# Supplementary material
Source: Research Square preprint supplement (doi:10.21203/rs.3.rs-9349369/v1)
Supplement: Supplementary file 1 [file 1c7b42b2a1d19cdc79216646.xlsx]

## Sheet: Root-hypoxia
Supplemental Table S6. Lists of root and shoot DEGs associated with GO:0001666 (Response to Hypoxia). These DEGs were clustered based on consistent expression patterns across the five genotypes used in APEX08 (Figure 5B). Organ-specific expression responses to spaceflight conditions are shown for the 5 genotypes included in APEX08. The results of GO- and transcription-factor target enrichment ana…
		Root
	Gene ID	Col	adc1	OXCuAO3	cdr7/cuao3	OXPtADC	Symbol	Annotation
a	AT3G49780	0.631446	0.981872	0.799516	0	0.96521	PSK4	phytosulfokine 4 precursor (PSK4); FUNCTIONS IN: growth factor activity; INVOLVED IN: cell proliferation, cell differentiation, response to wounding, organ morphogenesis; LOCATED IN: extracellular matrix; EXPRESSED IN: 25 plant structures; EXPRESSED DURING: 10 growth stages; CONTAINS InterPro DOMAIN/s: Phytosulfokine (InterPro:IPR009438); BEST Arabidopsis thaliana protein match is: phytosulfokine…
	AT3G06435	0.828527	1.07931	0.978074	0	0.833792	AT3G06435	Expressed protein; Has 35333 Blast hits to 34131 proteins in 2444 species: Archae - 798; Bacteria - 22429; Metazoa - 974; Fungi - 991; Plants - 531; Viruses - 0; Other Eukaryotes - 9610 (source: NCBI BLink).
	AT3G23150	0.625625	0.911857	0.60535	0	1.19289	ETR2	ethylene response 2 (ETR2); FUNCTIONS IN: ethylene binding, protein histidine kinase activity, receptor activity, glycogen synthase kinase 3 activity; INVOLVED IN: negative regulation of ethylene mediated signaling pathway; LOCATED IN: endomembrane system, endoplasmic reticulum membrane, membrane; EXPRESSED IN: 22 plant structures; EXPRESSED DURING: 7 growth stages; CONTAINS InterPro DOMAIN/s: Si…
	AT1g10140	0.517696	0.799042	0.954927	0.470485	0.920556	AT1G10140	Uncharacterised conserved protein UCP031279; FUNCTIONS IN: molecular_function unknown; INVOLVED IN: biological_process unknown; LOCATED IN: plasma membrane; EXPRESSED IN: 23 plant structures; EXPRESSED DURING: 13 growth stages; CONTAINS InterPro DOMAIN/s: Uncharacterised conserved protein UCP031279 (InterPro:IPR016972); BEST Arabidopsis thaliana protein match is: Uncharacterised conserved protein…
	AT4G32480	1.89349	2.20656	2.5272	1.91341	1.67828	AT4G32480	Protein of unknown function (DUF506) ; FUNCTIONS IN: molecular_function unknown; INVOLVED IN: biological_process unknown; LOCATED IN: cellular_component unknown; EXPRESSED IN: cultured cell; CONTAINS InterPro DOMAIN/s: Protein of unknown function DUF506, plant (InterPro:IPR006502); BEST Arabidopsis thaliana protein match is: Protein of unknown function (DUF506) (TAIR:AT2G20670.1); Has 1807 Blast …
	AT5G19120	1.3096	1.59122	1.58332	1.27642	1.3405	AT5G19120	Eukaryotic aspartyl protease family protein; FUNCTIONS IN: aspartic-type endopeptidase activity; INVOLVED IN: proteolysis; LOCATED IN: endomembrane system; EXPRESSED IN: 24 plant structures; EXPRESSED DURING: 13 growth stages; CONTAINS InterPro DOMAIN/s: Peptidase aspartic (InterPro:IPR021109), Peptidase aspartic, catalytic (InterPro:IPR009007), Peptidase A1 (InterPro:IPR001461); BEST Arabidopsis…
	AT2G15890	1.11793	1.76132	1.9061	1.09687	1.16799	MEE14	maternal effect embryo arrest 14 (MEE14); FUNCTIONS IN: molecular_function unknown; INVOLVED IN: defense response to fungus, embryo development ending in seed dormancy; LOCATED IN: chloroplast; EXPRESSED IN: 22 plant structures; EXPRESSED DURING: 13 growth stages; Has 87 Blast hits to 87 proteins in 44 species: Archae - 0; Bacteria - 0; Metazoa - 0; Fungi - 0; Plants - 85; Viruses - 0; Other Euka…
	AT4G38470	0.566397	0.835118	0.980994	0.895212	0.883277	STY46	ACT-like protein tyrosine kinase family protein; FUNCTIONS IN: protein serine/threonine/tyrosine kinase activity, protein kinase activity; INVOLVED IN: protein amino acid phosphorylation, metabolic process; LOCATED IN: cytosol; EXPRESSED IN: 25 plant structures; EXPRESSED DURING: 15 growth stages; CONTAINS InterPro DOMAIN/s: Serine/threonine-protein kinase domain (InterPro:IPR002290), Amino acid-…
	AT1G33055	1.67206	2.63628	2.27715	1.86619	2.28419	AT1G33055	unknown protein; FUNCTIONS IN: molecular_function unknown; INVOLVED IN: anaerobic respiration; LOCATED IN: endomembrane system; EXPRESSED IN: 13 plant structures; EXPRESSED DURING: 6 growth stages; Has 20 Blast hits to 20 proteins in 8 species: Archae - 0; Bacteria - 0; Metazoa - 0; Fungi - 0; Plants - 20; Viruses - 0; Other Eukaryotes - 0 (source: NCBI BLink).
	AT4G27450	1.42851	1.61431	1.49679	1.84388	1.42833	AT4G27450	Aluminium induced protein with YGL and LRDR motifs; FUNCTIONS IN: molecular_function unknown; INVOLVED IN: biological_process unknown; LOCATED IN: cytosol, nucleus, plasma membrane; EXPRESSED IN: 25 plant structures; EXPRESSED DURING: 14 growth stages; BEST Arabidopsis thaliana protein match is: Aluminium induced protein with YGL and LRDR motifs (TAIR:AT3G15450.1); Has 30201 Blast hits to 17322 p…
b	AT5G19230	0	0.641504	0	0	0	AT5G19230	Glycoprotein membrane precursor GPI-anchored; FUNCTIONS IN: molecular_function unknown; INVOLVED IN: biological_process unknown; LOCATED IN: anchored to plasma membrane, plasma membrane, anchored to membrane; EXPRESSED IN: callus; BEST Arabidopsis thaliana protein match is: Glycoprotein membrane precursor GPI-anchored (TAIR:AT5G19240.1); Has 1807 Blast hits to 1807 proteins in 277 species: Archae…
	AT5G27420	0	0.976991	0	0	0	CNI1	carbon/nitrogen insensitive 1 (CNI1); CONTAINS InterPro DOMAIN/s: Zinc finger, RING-type (InterPro:IPR001841), Zinc finger, C3HC4 RING-type (InterPro:IPR018957); BEST Arabidopsis thaliana protein match is: RING/U-box superfamily protein (TAIR:AT3G05200.1); Has 1807 Blast hits to 1807 proteins in 277 species: Archae - 0; Bacteria - 0; Metazoa - 736; Fungi - 347; Plants - 385; Viruses - 0; Other Eu…
	AT1G14540	0	1.90576	0	0	0	PER4	Peroxidase superfamily protein; FUNCTIONS IN: peroxidase activity, heme binding; INVOLVED IN: response to oxidative stress, oxidation reduction; LOCATED IN: endomembrane system; EXPRESSED IN: leaf apex, sepal, root, stamen; EXPRESSED DURING: 4 anthesis; CONTAINS InterPro DOMAIN/s: Haem peroxidase (InterPro:IPR010255), Plant peroxidase (InterPro:IPR000823), Peroxidases heam-ligand binding site (In…
	AT2G25735	0	2.40246	0	0	0	AT2G25735	unknown protein; Has 31 Blast hits to 31 proteins in 9 species: Archae - 0; Bacteria - 0; Metazoa - 0; Fungi - 0; Plants - 31; Viruses - 0; Other Eukaryotes - 0 (source: NCBI BLink).
	AT3G03670	0	2.3949	0	0	0	AT3G03670	Peroxidase superfamily protein; FUNCTIONS IN: peroxidase activity, heme binding; INVOLVED IN: oxidation reduction, response to oxidative stress; LOCATED IN: plant-type cell wall; EXPRESSED IN: 9 plant structures; EXPRESSED DURING: 4 anthesis, C globular stage, petal differentiation and expansion stage; CONTAINS InterPro DOMAIN/s: Haem peroxidase (InterPro:IPR010255), Plant peroxidase (InterPro:IP…
	AT5G13320	0	2.70401	0	0	-2.33659	PBS3	AVRPPHB SUSCEPTIBLE 3 (PBS3); CONTAINS InterPro DOMAIN/s: GH3 auxin-responsive promoter (InterPro:IPR004993); BEST Arabidopsis thaliana protein match is: Auxin-responsive GH3 family protein (TAIR:AT1G23160.1); Has 1807 Blast hits to 1807 proteins in 277 species: Archae - 0; Bacteria - 0; Metazoa - 736; Fungi - 347; Plants - 385; Viruses - 0; Other Eukaryotes - 339 (source: NCBI BLink).
c	AT3G07350	1.44402	1.79088	1.59054	0.693763	0	F21O3.6	Protein of unknown function (DUF506) ; CONTAINS InterPro DOMAIN/s: Protein of unknown function DUF506, plant (InterPro:IPR006502); BEST Arabidopsis thaliana protein match is: Protein of unknown function (DUF506) (TAIR:AT3G25240.1); Has 393 Blast hits to 390 proteins in 24 species: Archae - 0; Bacteria - 0; Metazoa - 0; Fungi - 0; Plants - 391; Viruses - 0; Other Eukaryotes - 2 (source: NCBI BLink…
	AT1G03220	0.514611	0.60014	0.558749	0	0	AT1G03220	Eukaryotic aspartyl protease family protein; FUNCTIONS IN: aspartic-type endopeptidase activity; INVOLVED IN: response to salt stress; LOCATED IN: cell wall, plasma membrane, membrane, plant-type cell wall; EXPRESSED IN: 6 plant structures; CONTAINS InterPro DOMAIN/s: Peptidase aspartic (InterPro:IPR021109), Peptidase aspartic, catalytic (InterPro:IPR009007), Peptidase A1 (InterPro:IPR001461); BE…
	AT1G78850	0.601259	0.596164	0.758181	0	0	AT1G78850	D-mannose binding lectin protein with Apple-like carbohydrate-binding domain; FUNCTIONS IN: sugar binding; LOCATED IN: apoplast, cell wall, plasma membrane, plant-type cell wall; EXPRESSED IN: phloem, stem, guard cell, cultured cell, callus; CONTAINS InterPro DOMAIN/s: Curculin-like (mannose-binding) lectin (InterPro:IPR001480), Apple-like (InterPro:IPR003609); BEST Arabidopsis thaliana protein m…
	AT5G26920	0.909058	1.95645	1.04666	0	0	CBP60G	Cam-binding protein 60-like G (CBP60G); CONTAINS InterPro DOMAIN/s: Calmodulin binding protein-like (InterPro:IPR012416); BEST Arabidopsis thaliana protein match is: Calmodulin-binding protein (TAIR:AT4G25800.2); Has 271 Blast hits to 271 proteins in 14 species: Archae - 0; Bacteria - 0; Metazoa - 0; Fungi - 0; Plants - 271; Viruses - 0; Other Eukaryotes - 0 (source: NCBI BLink).
	AT2G26560	1.82264	3.21519	1.72769	0	0	PLA2A	phospholipase A 2A (PLA2A); FUNCTIONS IN: lipase activity, nutrient reservoir activity; INVOLVED IN: in 6 processes; LOCATED IN: membrane, cytoplasm; EXPRESSED IN: 11 plant structures; EXPRESSED DURING: 8 growth stages; CONTAINS InterPro DOMAIN/s: Acyl transferase/acyl hydrolase/lysophospholipase (InterPro:IPR016035), Patatin (InterPro:IPR002641); BEST Arabidopsis thaliana protein match is: Acyl …
	AT1G26380	1.64375	2.76832	1.4951	0	0	AT1G26380	FAD-binding Berberine family protein; FUNCTIONS IN: electron carrier activity, oxidoreductase activity, FAD binding, catalytic activity; LOCATED IN: endomembrane system; EXPRESSED IN: 9 plant structures; EXPRESSED DURING: LP.06 six leaves visible, LP.04 four leaves visible, 4 anthesis, LP.08 eight leaves visible; CONTAINS InterPro DOMAIN/s: FAD-binding, type 2 (InterPro:IPR016166), Berberine/berb…
	AT5G65207	0.791058	1.33537	1.20294	0	0	AT5G65207	unknown protein; BEST Arabidopsis thaliana protein match is: unknown protein (TAIR:AT5G10040.1); Has 30201 Blast hits to 17322 proteins in 780 species: Archae - 12; Bacteria - 1396; Metazoa - 17338; Fungi - 3422; Plants - 5037; Viruses - 0; Other Eukaryotes - 2996 (source: NCBI BLink).
	AT1G72900	1.0783	1.79987	1.37993	0	0	AT1G72900	Toll-Interleukin-Resistance (TIR) domain-containing protein; FUNCTIONS IN: transmembrane receptor activity, ATP binding; INVOLVED IN: signal transduction, defense response, apoptosis, innate immune response; LOCATED IN: intrinsic to membrane; EXPRESSED IN: 20 plant structures; EXPRESSED DURING: 10 growth stages; CONTAINS InterPro DOMAIN/s: NB-ARC (InterPro:IPR002182), Toll-Interleukin receptor (I…
	AT5G57220	1.49334	1.94334	1.20874	0	0	CYP81F2	cytochrome P450, family 81, subfamily F, polypeptide 2 (CYP81F2); FUNCTIONS IN: electron carrier activity, monooxygenase activity, iron ion binding, oxygen binding, heme binding; INVOLVED IN: in 7 processes; LOCATED IN: endomembrane system; EXPRESSED IN: 8 plant structures; EXPRESSED DURING: 6 growth stages; CONTAINS InterPro DOMAIN/s: Cytochrome P450 (InterPro:IPR001128), Cytochrome P450, conser…
	AT1G26410	2.30866	2.78888	1.85653	0	0	AT1G26410	FAD-binding Berberine family protein; FUNCTIONS IN: electron carrier activity, oxidoreductase activity, FAD binding, catalytic activity; LOCATED IN: cellular_component unknown; CONTAINS InterPro DOMAIN/s: FAD-binding, type 2 (InterPro:IPR016166), Berberine/berberine-like (InterPro:IPR012951), FAD linked oxidase, N-terminal (InterPro:IPR006094); BEST Arabidopsis thaliana protein match is: FAD-bind…
	AT2G23270	2.51254	3.07644	1.97627	0	0	AT2G23270	unknown protein; FUNCTIONS IN: molecular_function unknown; INVOLVED IN: biological_process unknown; LOCATED IN: endomembrane system; EXPRESSED IN: stem, sperm cell, root, stamen; EXPRESSED DURING: 4 anthesis; BEST Arabidopsis thaliana protein match is: unknown protein (TAIR:AT4G37290.1); Has 36 Blast hits to 35 proteins in 6 species: Archae - 0; Bacteria - 0; Metazoa - 0; Fungi - 0; Plants - 36; …
d	AT1G55810	0.4276	0	0.438265	0.65518	0	UKL3	uridine kinase-like 3 (UKL3); FUNCTIONS IN: uracil phosphoribosyltransferase activity, phosphotransferase activity, alcohol group as acceptor, kinase activity, ATP binding; INVOLVED IN: biosynthetic process, metabolic process; LOCATED IN: cellular_component unknown; EXPRESSED IN: 22 plant structures; EXPRESSED DURING: 13 growth stages; CONTAINS InterPro DOMAIN/s: Phosphoribulokinase/uridine kinas…
	AT5G41080	0.892915	0.691382	0.991982	0.711912	0	GDPD2	PLC-like phosphodiesterases superfamily protein; FUNCTIONS IN: phosphoric diester hydrolase activity, glycerophosphodiester phosphodiesterase activity; INVOLVED IN: glycerol metabolic process, lipid metabolic process; EXPRESSED IN: 23 plant structures; EXPRESSED DURING: 14 growth stages; CONTAINS InterPro DOMAIN/s: PLC-like phosphodiesterase, TIM beta/alpha-barrel domain (InterPro:IPR017946), Gly…
	AT4G24230	0.943002	1.00908	1.14392	0.931858	0	ACBP3	acyl-CoA-binding domain 3 (ACBP3); FUNCTIONS IN: acyl-CoA binding; INVOLVED IN: fatty acid transport; LOCATED IN: extracellular region; EXPRESSED IN: 6 plant structures; CONTAINS InterPro DOMAIN/s: Acyl-CoA-binding protein, ACBP (InterPro:IPR000582), FERM/acyl-CoA-binding protein, 3-helical bundle (InterPro:IPR014352); BEST Arabidopsis thaliana protein match is: acyl-CoA binding protein 2 (TAIR:A…
	AT1G30720	1.10959	1.17814	1.3096	1.47432	0	AT1G30720	FAD-binding Berberine family protein; FUNCTIONS IN: electron carrier activity, oxidoreductase activity, FAD binding, catalytic activity; LOCATED IN: endomembrane system; CONTAINS InterPro DOMAIN/s: FAD-binding, type 2 (InterPro:IPR016166), Berberine/berberine-like (InterPro:IPR012951), FAD linked oxidase, N-terminal (InterPro:IPR006094); BEST Arabidopsis thaliana protein match is: FAD-binding Ber…
	AT5G20250	1.03793	1.38701	1.26544	1.41241	0	DIN10	DARK INDUCIBLE 10 (DIN10); FUNCTIONS IN: hydrolase activity, hydrolyzing O-glycosyl compounds; INVOLVED IN: response to karrikin, aging, response to light stimulus, response to cold, response to sucrose stimulus; LOCATED IN: chloroplast; EXPRESSED IN: 25 plant structures; EXPRESSED DURING: 14 growth stages; CONTAINS InterPro DOMAIN/s: Glycoside hydrolase, catalytic core (InterPro:IPR017853), Raff…
	AT5G25110	1.11497	1.18499	0.981915	1.29079	0	CIPK25	CBL-interacting protein kinase 25 (CIPK25); FUNCTIONS IN: protein serine/threonine kinase activity, protein kinase activity, kinase activity, ATP binding; INVOLVED IN: defense response to fungus; EXPRESSED IN: 9 plant structures; EXPRESSED DURING: 4 anthesis, C globular stage, petal differentiation and expansion stage; CONTAINS InterPro DOMAIN/s: Protein kinase, ATP binding site (InterPro:IPR0174…
	AT1G19530	1.12946	1.68962	1.8278	1.57148	0	AT1G19530	unknown protein; FUNCTIONS IN: molecular_function unknown; INVOLVED IN: N-terminal protein myristoylation, anaerobic respiration; LOCATED IN: cellular_component unknown; EXPRESSED IN: leaf apex, inflorescence meristem, hypocotyl, root, flower; EXPRESSED DURING: petal differentiation and expansion stage; Has 47 Blast hits to 47 proteins in 13 species: Archae - 0; Bacteria - 0; Metazoa - 0; Fungi -…
e	AT2G36580	-0.380413	-0.654796	-0.743803	0	-0.756851	AT2G36580	Pyruvate kinase family protein; FUNCTIONS IN: pyruvate kinase activity, potassium ion binding, magnesium ion binding, catalytic activity; INVOLVED IN: glycolysis; LOCATED IN: plasma membrane; EXPRESSED IN: guard cell; CONTAINS InterPro DOMAIN/s: Pyruvate/Phosphoenolpyruvate kinase, catalytic core (InterPro:IPR015813), Pyruvate kinase, alpha/beta (InterPro:IPR015794), Pyruvate kinase, beta-barrel-…
	AT5G58070	-0.984625	-0.590121	-0.532809	-0.701718	-0.551343	TIL	temperature-induced lipocalin (TIL); FUNCTIONS IN: binding, transporter activity; INVOLVED IN: transport, response to cold, response to light stimulus, response to heat; LOCATED IN: mitochondrion, endoplasmic reticulum, plasma membrane, vacuole; EXPRESSED IN: 26 plant structures; EXPRESSED DURING: 17 growth stages; CONTAINS InterPro DOMAIN/s: Lipocalin, bacterial (InterPro:IPR002446), Lipocalin, …
	AT1G67360	-0.984369	-1.22518	-1.18544	-1.29636	-0.992295	AT1G67360	Rubber elongation factor protein (REF); INVOLVED IN: biological_process unknown; LOCATED IN: vacuole; EXPRESSED IN: 24 plant structures; EXPRESSED DURING: 15 growth stages; CONTAINS InterPro DOMAIN/s: Rubber elongation factor (InterPro:IPR008802); BEST Arabidopsis thaliana protein match is: Rubber elongation factor protein (REF) (TAIR:AT2G47780.1); Has 125 Blast hits to 125 proteins in 21 species…
f	AT5G66650	-0.7945	0	0	0	0	AT5G66650	Protein of unknown function (DUF607); CONTAINS InterPro DOMAIN/s: Protein of unknown function DUF607 (InterPro:IPR006769); BEST Arabidopsis thaliana protein match is: Protein of unknown function (DUF607) (TAIR:AT2G23790.1); Has 1807 Blast hits to 1807 proteins in 277 species: Archae - 0; Bacteria - 0; Metazoa - 736; Fungi - 347; Plants - 385; Viruses - 0; Other Eukaryotes - 339 (source: NCBI BLin…
	AT2G41010	-0.801834	0	0	0	0	CAMBP25	calmodulin (CAM)-binding protein of 25 kDa (CAMBP25); CONTAINS InterPro DOMAIN/s: VQ (InterPro:IPR008889); BEST Arabidopsis thaliana protein match is: VQ motif-containing protein (TAIR:AT3G56880.1); Has 142 Blast hits to 142 proteins in 12 species: Archae - 0; Bacteria - 0; Metazoa - 0; Fungi - 0; Plants - 142; Viruses - 0; Other Eukaryotes - 0 (source: NCBI BLink).
	AT4G12720	-0.752344	0	0	0	0	NUDT7	NUDT7; FUNCTIONS IN: in 6 functions; INVOLVED IN: in 8 processes; LOCATED IN: cytosol; EXPRESSED IN: 23 plant structures; EXPRESSED DURING: 14 growth stages; CONTAINS InterPro DOMAIN/s: NUDIX hydrolase domain-like (InterPro:IPR015797), NUDIX hydrolase, conserved site (InterPro:IPR020084), Nudix hydrolase 6-like (InterPro:IPR003293), NUDIX hydrolase domain (InterPro:IPR000086); BEST Arabidopsis th…
	AT1G50740	-1.06971	0	0	0	0	AT1G50740	Transmembrane proteins 14C; FUNCTIONS IN: molecular_function unknown; INVOLVED IN: biological_process unknown; LOCATED IN: endomembrane system, membrane; EXPRESSED IN: 23 plant structures; EXPRESSED DURING: 15 growth stages; CONTAINS InterPro DOMAIN/s: Uncharacterised protein family UPF0136, Transmembrane (InterPro:IPR005349); BEST Arabidopsis thaliana protein match is: Transmembrane proteins 14C…
	AT3G52800	-0.763864	0	0	0	0	AT3G52800	A20/AN1-like zinc finger family protein; FUNCTIONS IN: DNA binding, zinc ion binding; INVOLVED IN: response to chitin; LOCATED IN: cellular_component unknown; EXPRESSED IN: 23 plant structures; EXPRESSED DURING: 15 growth stages; CONTAINS InterPro DOMAIN/s: Zinc finger, AN1-type (InterPro:IPR000058), Zinc finger, A20-type (InterPro:IPR002653); BEST Arabidopsis thaliana protein match is: A20/AN1-l…
	AT1G22220	-0.418107	0	0	0	0	AUF2	F-box family protein; CONTAINS InterPro DOMAIN/s: F-box domain, cyclin-like (InterPro:IPR001810); BEST Arabidopsis thaliana protein match is: F-box family protein (TAIR:AT1G78100.1); Has 155 Blast hits to 154 proteins in 12 species: Archae - 0; Bacteria - 0; Metazoa - 0; Fungi - 0; Plants - 155; Viruses - 0; Other Eukaryotes - 0 (source: NCBI BLink).
	AT4G01250	-1.21913	0	0	0	0	WRKY22	WRKY22; CONTAINS InterPro DOMAIN/s: DNA-binding WRKY (InterPro:IPR003657); BEST Arabidopsis thaliana protein match is: WRKY family transcription factor (TAIR:AT4G23550.1); Has 3274 Blast hits to 2836 proteins in 187 species: Archae - 0; Bacteria - 0; Metazoa - 0; Fungi - 3; Plants - 3256; Viruses - 0; Other Eukaryotes - 15 (source: NCBI BLink).
	AT3G15210	-0.589249	0	0	0	0	ERF4	ethylene responsive element binding factor 4 (ERF4); CONTAINS InterPro DOMAIN/s: DNA-binding, integrase-type (InterPro:IPR016177), Pathogenesis-related transcriptional factor/ERF, DNA-binding (InterPro:IPR001471); BEST Arabidopsis thaliana protein match is: ethylene response factor 8 (TAIR:AT1G53170.1); Has 6170 Blast hits to 5786 proteins in 253 species: Archae - 0; Bacteria - 0; Metazoa - 0; Fu…
	AT1G09070	-0.916716	0	0	0	0	SRC2	soybean gene regulated by cold-2 (SRC2); CONTAINS InterPro DOMAIN/s: C2 calcium/lipid-binding domain, CaLB (InterPro:IPR008973), C2 calcium-dependent membrane targeting (InterPro:IPR000008); BEST Arabidopsis thaliana protein match is: Calcium-dependent lipid-binding (CaLB domain) family protein (TAIR:AT3G16510.1); Has 25146 Blast hits to 15856 proteins in 1076 species: Archae - 6; Bacteria - 3010…
	AT1G01720	-0.411378	0	0	0	0	ATAF1	ATAF1; CONTAINS InterPro DOMAIN/s: No apical meristem (NAM) protein (InterPro:IPR003441); BEST Arabidopsis thaliana protein match is: NAC domain containing protein 32 (TAIR:AT1G77450.1); Has 3043 Blast hits to 3037 proteins in 75 species: Archae - 0; Bacteria - 0; Metazoa - 0; Fungi - 0; Plants - 3043; Viruses - 0; Other Eukaryotes - 0 (source: NCBI BLink).
	AT3G25250	-0.86217	0	0	0	0	AGC2-1	AGC2-1; FUNCTIONS IN: kinase activity; INVOLVED IN: protein amino acid phosphorylation; LOCATED IN: cellular_component unknown; EXPRESSED IN: hypocotyl, root, stamen, pollen tube; EXPRESSED DURING: 4 anthesis, petal differentiation and expansion stage; CONTAINS InterPro DOMAIN/s: Protein kinase, catalytic domain (InterPro:IPR000719), Serine/threonine-protein kinase domain (InterPro:IPR002290), Se…
	AT1G53840	-0.498534	0	0	0	0	PME1	pectin methylesterase 1 (PME1); FUNCTIONS IN: pectinesterase activity; INVOLVED IN: cell wall modification; LOCATED IN: extracellular region, plasma membrane, membrane, plant-type cell wall; EXPRESSED IN: 24 plant structures; EXPRESSED DURING: 13 growth stages; CONTAINS InterPro DOMAIN/s: Pectinesterase, active site (InterPro:IPR018040), Pectin lyase fold/virulence factor (InterPro:IPR011050), Pe…
	AT2G40140	-0.769874	0	0	0	0	CZF1	CZF1; CONTAINS InterPro DOMAIN/s: Zinc finger, CCCH-type (InterPro:IPR000571), Ankyrin repeat-containing domain (InterPro:IPR020683), Ankyrin repeat (InterPro:IPR002110); BEST Arabidopsis thaliana protein match is: salt-inducible zinc finger 1 (TAIR:AT3G55980.1); Has 1196 Blast hits to 1143 proteins in 183 species: Archae - 4; Bacteria - 47; Metazoa - 401; Fungi - 61; Plants - 441; Viruses - 2; O…
	AT3G28910	-0.509911	0	0	0	0	MYB30	myb domain protein 30 (MYB30); CONTAINS InterPro DOMAIN/s: SANT, DNA-binding (InterPro:IPR001005), Homeodomain-like (InterPro:IPR009057), Myb, DNA-binding (InterPro:IPR014778), HTH transcriptional regulator, Myb-type, DNA-binding (InterPro:IPR017930), Homeodomain-related (InterPro:IPR012287), Myb transcription factor (InterPro:IPR015495); BEST Arabidopsis thaliana protein match is: myb domain pro…
	AT5G13190	-0.687911	0	0	0	0	GILP	CONTAINS InterPro DOMAIN/s: LPS-induced tumor necrosis factor alpha factor (InterPro:IPR006629); Has 30201 Blast hits to 17322 proteins in 780 species: Archae - 12; Bacteria - 1396; Metazoa - 17338; Fungi - 3422; Plants - 5037; Viruses - 0; Other Eukaryotes - 2996 (source: NCBI BLink).
	AT5G47910	-0.459842	0	0	0	0	RBOHD	respiratory burst oxidase homologue D (RBOHD); FUNCTIONS IN: NAD(P)H oxidase activity; INVOLVED IN: oxygen and reactive oxygen species metabolic process, defense response to fungus, response to heat, defense response, negative regulation of programmed cell death; LOCATED IN: plasma membrane; EXPRESSED IN: 24 plant structures; EXPRESSED DURING: 13 growth stages; CONTAINS InterPro DOMAIN/s: Ferredo…
	AT5G06320	-0.941364	0	0	0	0	NHL3	NDR1/HIN1-like 3 (NHL3); FUNCTIONS IN: molecular_function unknown; INVOLVED IN: defense response to virus, defense response to bacterium, response to bacterium; LOCATED IN: plasma membrane; EXPRESSED IN: 28 plant structures; EXPRESSED DURING: 13 growth stages; CONTAINS InterPro DOMAIN/s: Late embryogenesis abundant protein, group 2 (InterPro:IPR004864); BEST Arabidopsis thaliana protein match is:…
	AT3G56880	-0.800108	0	0	0	0	AT3G56880	VQ motif-containing protein; CONTAINS InterPro DOMAIN/s: VQ (InterPro:IPR008889); BEST Arabidopsis thaliana protein match is: calmodulin (CAM)-binding protein of 25 kDa (TAIR:AT2G41010.1); Has 109 Blast hits to 109 proteins in 12 species: Archae - 0; Bacteria - 0; Metazoa - 0; Fungi - 3; Plants - 106; Viruses - 0; Other Eukaryotes - 0 (source: NCBI BLink).
	AT1G18300	-1.62969	0	0	0	0	NUDT4	nudix hydrolase homolog 4 (NUDT4); FUNCTIONS IN: hydrolase activity; LOCATED IN: cytosol; EXPRESSED IN: stem, root, leaf; CONTAINS InterPro DOMAIN/s: NUDIX hydrolase domain-like (InterPro:IPR015797), NUDIX hydrolase, conserved site (InterPro:IPR020084), NUDIX hydrolase domain (InterPro:IPR000086); BEST Arabidopsis thaliana protein match is: nudix hydrolase homolog 21 (TAIR:AT1G73540.1); Has 1264 …
	AT3G55980	-1.24553	0	0	0	0	SZF1	salt-inducible zinc finger 1 (SZF1); CONTAINS InterPro DOMAIN/s: Zinc finger, CCCH-type (InterPro:IPR000571), Ankyrin repeat-containing domain (InterPro:IPR020683), Ankyrin repeat (InterPro:IPR002110); BEST Arabidopsis thaliana protein match is: zinc finger (CCCH-type) family protein (TAIR:AT2G40140.2); Has 1623 Blast hits to 1414 proteins in 181 species: Archae - 2; Bacteria - 49; Metazoa - 777;…
	AT5G24590	-0.651395	0	0	0	0	TIP	TCV-interacting protein (TIP); CONTAINS InterPro DOMAIN/s: No apical meristem (NAM) protein (InterPro:IPR003441); BEST Arabidopsis thaliana protein match is: NAC domain containing protein 62 (TAIR:AT3G49530.1); Has 2952 Blast hits to 2945 proteins in 75 species: Archae - 0; Bacteria - 0; Metazoa - 0; Fungi - 0; Plants - 2952; Viruses - 0; Other Eukaryotes - 0 (source: NCBI BLink).
	AT2G01150	-0.987027	0	0	0	0	RHA2B	RING-H2 finger protein 2B (RHA2B); CONTAINS InterPro DOMAIN/s: Zinc finger, RING-type (InterPro:IPR001841), Zinc finger, C3HC4 RING-type (InterPro:IPR018957); BEST Arabidopsis thaliana protein match is: RING-H2 finger A2A (TAIR:AT1G15100.1); Has 8536 Blast hits to 8514 proteins in 269 species: Archae - 0; Bacteria - 0; Metazoa - 2151; Fungi - 713; Plants - 4534; Viruses - 16; Other Eukaryotes - 1…
	AT1G07150	-0.867993	0	0	0	0	MAPKKK13	mitogen-activated protein kinase kinase kinase 13 (MAPKKK13); FUNCTIONS IN: protein serine/threonine kinase activity, protein kinase activity, kinase activity, ATP binding; INVOLVED IN: protein amino acid phosphorylation; EXPRESSED IN: 8 plant structures; EXPRESSED DURING: LP.04 four leaves visible, 4 anthesis, LP.10 ten leaves visible, petal differentiation and expansion stage; CONTAINS InterPro…
	AT2G22500	-0.692409	0	0	0	0	UCP5	uncoupling protein 5 (UCP5); FUNCTIONS IN: binding, dicarboxylic acid transmembrane transporter activity; INVOLVED IN: transport, mitochondrial transport; LOCATED IN: mitochondrion, mitochondrial inner membrane, membrane; EXPRESSED IN: 23 plant structures; EXPRESSED DURING: 15 growth stages; CONTAINS InterPro DOMAIN/s: Mitochondrial substrate carrier (InterPro:IPR001993), Mitochondrial brown fat …
	AT5G42050	-0.555228	0	0	0	0	AT5G42050	DCD (Development and Cell Death) domain protein; CONTAINS InterPro DOMAIN/s: Development/cell death domain (InterPro:IPR013989), Kelch related (InterPro:IPR013089); BEST Arabidopsis thaliana protein match is: DCD (Development and Cell Death) domain protein (TAIR:AT3G27090.1); Has 30201 Blast hits to 17322 proteins in 780 species: Archae - 12; Bacteria - 1396; Metazoa - 17338; Fungi - 3422; Plants…
	AT1G23710	-0.604273	0	0	0	0	AT1G23710	Protein of unknown function (DUF1645); CONTAINS InterPro DOMAIN/s: Protein of unknown function DUF1645 (InterPro:IPR012442); BEST Arabidopsis thaliana protein match is: Protein of unknown function (DUF1645) (TAIR:AT1G70420.1); Has 288 Blast hits to 282 proteins in 52 species: Archae - 0; Bacteria - 6; Metazoa - 16; Fungi - 11; Plants - 191; Viruses - 0; Other Eukaryotes - 64 (source: NCBI BLink).
	AT4G34150	-1.16402	0	0	0	0	AT4G34150	Calcium-dependent lipid-binding (CaLB domain) family protein; CONTAINS InterPro DOMAIN/s: C2 membrane targeting protein (InterPro:IPR018029), C2 calcium/lipid-binding domain, CaLB (InterPro:IPR008973), C2 calcium-dependent membrane targeting (InterPro:IPR000008); BEST Arabidopsis thaliana protein match is: soybean gene regulated by cold-2 (TAIR:AT1G09070.1); Has 30201 Blast hits to 17322 proteins…
	AT5G42380	-1.79016	0	0	0	0	CML37	calmodulin like 37 (CML37); FUNCTIONS IN: calcium ion binding; INVOLVED IN: response to ozone; LOCATED IN: chloroplast; EXPRESSED IN: 12 plant structures; EXPRESSED DURING: 8 growth stages; CONTAINS InterPro DOMAIN/s: EF-Hand 1, calcium-binding site (InterPro:IPR018247), EF-HAND 2 (InterPro:IPR018249), EF-hand-like domain (InterPro:IPR011992), Calcium-binding EF-hand (InterPro:IPR002048), EF-hand…
	AT1G27730	-1.23227	0	0	0	0	STZ	salt tolerance zinc finger (STZ); CONTAINS InterPro DOMAIN/s: Zinc finger, C2H2-like (InterPro:IPR015880), Zinc finger, C2H2-type (InterPro:IPR007087); BEST Arabidopsis thaliana protein match is: zinc finger of Arabidopsis thaliana 6 (TAIR:AT5G04340.1); Has 5350 Blast hits to 3982 proteins in 146 species: Archae - 0; Bacteria - 0; Metazoa - 4198; Fungi - 48; Plants - 937; Viruses - 0; Other Eukar…
	AT1G72920	-1.26848	0	0	0	0	AT1G72920	Toll-Interleukin-Resistance (TIR) domain family protein; FUNCTIONS IN: transmembrane receptor activity; INVOLVED IN: response to wounding, defense response; LOCATED IN: intrinsic to membrane; EXPRESSED IN: 19 plant structures; EXPRESSED DURING: 10 growth stages; CONTAINS InterPro DOMAIN/s: Toll-Interleukin receptor (InterPro:IPR000157); BEST Arabidopsis thaliana protein match is: Toll-Interleukin…
	AT4G30280	-0.660734	0	0	0	0	XTH18	xyloglucan endotransglucosylase/hydrolase 18 (XTH18); FUNCTIONS IN: hydrolase activity, acting on glycosyl bonds, xyloglucan endotransglucosylase activity; INVOLVED IN: xyloglucan metabolic process; LOCATED IN: endomembrane system, apoplast, cell wall; EXPRESSED IN: 13 plant structures; EXPRESSED DURING: 7 growth stages; CONTAINS InterPro DOMAIN/s: Xyloglucan endotransglucosylase/hydrolase (Inter…
	AT1G13360	-0.359714	0	0	0	0	AT1G13360	unknown protein; BEST Arabidopsis thaliana protein match is: unknown protein (TAIR:AT3G25870.1); Has 69 Blast hits to 69 proteins in 16 species: Archae - 0; Bacteria - 0; Metazoa - 6; Fungi - 0; Plants - 63; Viruses - 0; Other Eukaryotes - 0 (source: NCBI BLink).
	AT3G23170	-0.750192	0	0	0	0	AT3G23170	unknown protein; BEST Arabidopsis thaliana protein match is: unknown protein (TAIR:AT4G14450.1); Has 74 Blast hits to 74 proteins in 6 species: Archae - 0; Bacteria - 0; Metazoa - 0; Fungi - 0; Plants - 74; Viruses - 0; Other Eukaryotes - 0 (source: NCBI BLink).
	AT5G66985	-0.491848	0	0	0	0	AT5G66985	unknown protein; Has 30201 Blast hits to 17322 proteins in 780 species: Archae - 12; Bacteria - 1396; Metazoa - 17338; Fungi - 3422; Plants - 5037; Viruses - 0; Other Eukaryotes - 2996 (source: NCBI BLink).
	AT2G33590	-0.327785	0	0	0	0	CRL1	NAD(P)-binding Rossmann-fold superfamily protein; FUNCTIONS IN: coenzyme binding, binding, cinnamoyl-CoA reductase activity, catalytic activity; INVOLVED IN: response to cadmium ion, lignin biosynthetic process; LOCATED IN: cellular_component unknown; EXPRESSED IN: 23 plant structures; EXPRESSED DURING: 13 growth stages; CONTAINS InterPro DOMAIN/s: NAD-dependent epimerase/dehydratase (InterPro:IP…
	AT4G30440	-0.572339	0	0	0	0	GAE1	UDP-D-glucuronate 4-epimerase 1 (GAE1); FUNCTIONS IN: UDP-glucuronate 4-epimerase activity, catalytic activity; INVOLVED IN: cellular metabolic process, carbohydrate metabolic process, nucleotide-sugar metabolic process, metabolic process; LOCATED IN: cellular_component unknown; EXPRESSED IN: 24 plant structures; EXPRESSED DURING: 15 growth stages; CONTAINS InterPro DOMAIN/s: NAD-dependent epimer…
	AT2G40000	-0.906802	0	0	0	0	HSPRO2	ortholog of sugar beet HS1 PRO-1 2 (HSPRO2); CONTAINS InterPro DOMAIN/s: Hs1pro-1, C-terminal (InterPro:IPR009743), Hs1pro-1, N-terminal (InterPro:IPR009869); BEST Arabidopsis thaliana protein match is: Hs1pro-1 protein (TAIR:AT3G55840.1); Has 71 Blast hits to 71 proteins in 18 species: Archae - 0; Bacteria - 0; Metazoa - 0; Fungi - 0; Plants - 60; Viruses - 0; Other Eukaryotes - 11 (source: NCBI…
	AT1G26270	-0.332073	0	0	0	0	AT1G26270	Phosphatidylinositol 3- and 4-kinase family protein; FUNCTIONS IN: inositol or phosphatidylinositol kinase activity, phosphotransferase activity, alcohol group as acceptor; LOCATED IN: cellular_component unknown; EXPRESSED IN: 23 plant structures; EXPRESSED DURING: 13 growth stages; CONTAINS InterPro DOMAIN/s: Phosphatidylinositol 3-/4-kinase, catalytic (InterPro:IPR000403); BEST Arabidopsis thal…
	AT3G52430	-0.554693	0	0	0	0	PAD4	PHYTOALEXIN DEFICIENT 4 (PAD4); CONTAINS InterPro DOMAIN/s: Lipase, class 3 (InterPro:IPR002921); BEST Arabidopsis thaliana protein match is: senescence-associated gene 101 (TAIR:AT5G14930.2); Has 722 Blast hits to 622 proteins in 73 species: Archae - 0; Bacteria - 23; Metazoa - 17; Fungi - 11; Plants - 620; Viruses - 1; Other Eukaryotes - 50 (source: NCBI BLink).
	AT1G07135	-1.81186	0	0	0	0	AT1G07135	glycine-rich protein; Has 22251 Blast hits to 8348 proteins in 789 species: Archae - 21; Bacteria - 7328; Metazoa - 6126; Fungi - 1280; Plants - 3980; Viruses - 524; Other Eukaryotes - 2992 (source: NCBI BLink).
	AT4G11660	-0.98163	0	0	0	0	AT-HSFB2B	AT-HSFB2B; FUNCTIONS IN: transcription repressor activity, sequence-specific DNA binding transcription factor activity; INVOLVED IN: response to chitin; LOCATED IN: nucleus; EXPRESSED IN: 24 plant structures; EXPRESSED DURING: 14 growth stages; CONTAINS InterPro DOMAIN/s: Winged helix-turn-helix transcription repressor DNA-binding (InterPro:IPR011991), Heat shock factor (HSF)-type, DNA-binding (I…
	AT1G15010	-1.35017	0	0	0	0	AT1G15010	unknown protein; BEST Arabidopsis thaliana protein match is: unknown protein (TAIR:AT2G01300.1); Has 71 Blast hits to 71 proteins in 13 species: Archae - 0; Bacteria - 2; Metazoa - 0; Fungi - 0; Plants - 69; Viruses - 0; Other Eukaryotes - 0 (source: NCBI BLink).
h	AT5G39890	0.635638	0	0	0	0	AT5G39890	Protein of unknown function (DUF1637); FUNCTIONS IN: cysteamine dioxygenase activity; INVOLVED IN: oxidation reduction; LOCATED IN: cellular_component unknown; EXPRESSED IN: 24 plant structures; EXPRESSED DURING: 15 growth stages; CONTAINS InterPro DOMAIN/s: Protein of unknown function DUF1637 (InterPro:IPR012864); BEST Arabidopsis thaliana protein match is: Protein of unknown function (DUF1637) …
	AT3G02550	0.676088	0	0	0	0	LBD41	LOB domain-containing protein 41 (LBD41); CONTAINS InterPro DOMAIN/s: Lateral organ boundaries, LOB (InterPro:IPR004883), Asymmetric leaves, AS2/LOB (InterPro:IPR017414); BEST Arabidopsis thaliana protein match is: LOB domain-containing protein 40 (TAIR:AT1G67100.1); Has 601 Blast hits to 600 proteins in 23 species: Archae - 0; Bacteria - 0; Metazoa - 0; Fungi - 0; Plants - 601; Viruses - 0; Othe…
	AT5G25250	0.969803	0	0	0	0	FLOT1	SPFH/Band 7/PHB domain-containing membrane-associated protein family; FUNCTIONS IN: molecular_function unknown; INVOLVED IN: biological_process unknown; LOCATED IN: plasma membrane, vacuole; EXPRESSED IN: cultured cell; CONTAINS InterPro DOMAIN/s: Band 7 protein (InterPro:IPR001107); BEST Arabidopsis thaliana protein match is: SPFH/Band 7/PHB domain-containing membrane-associated protein family (…
	AT2G44800	1.01154	0	0	0	0	AT2G44800	2-oxoglutarate (2OG) and Fe(II)-dependent oxygenase superfamily protein; FUNCTIONS IN: oxidoreductase activity, acting on paired donors, with incorporation or reduction of molecular oxygen, 2-oxoglutarate as one donor, and incorporation of one atom each of oxygen into both donors, oxidoreductase activity; INVOLVED IN: biological_process unknown; LOCATED IN: cellular_component unknown; CONTAINS In…
	AT5G15120	0.568691	0	0	0	0	AT5G15120	Protein of unknown function (DUF1637); FUNCTIONS IN: cysteamine dioxygenase activity; INVOLVED IN: anaerobic respiration; LOCATED IN: cellular_component unknown; EXPRESSED IN: 20 plant structures; EXPRESSED DURING: 8 growth stages; CONTAINS InterPro DOMAIN/s: Protein of unknown function DUF1637 (InterPro:IPR012864); BEST Arabidopsis thaliana protein match is: Protein of unknown function (DUF1637)…
	AT1G72330	0.721824	0	0	0	0	ALAAT2	alanine aminotransferase 2 (ALAAT2); FUNCTIONS IN: copper ion binding, L-alanine:2-oxoglutarate aminotransferase activity, ATP binding; INVOLVED IN: glycolysis, biosynthetic process, L-alanine biosynthetic process from pyruvate, L-alanine catabolic process, by transamination; LOCATED IN: mitochondrion; CONTAINS InterPro DOMAIN/s: 1-aminocyclopropane-1-carboxylate synthase (InterPro:IPR001176), Py…
	AT5G03730	0.276806	0	0	0	0	CTR1	CONSTITUTIVE TRIPLE RESPONSE 1 (CTR1); CONTAINS InterPro DOMAIN/s: Protein kinase, ATP binding site (InterPro:IPR017441), Serine/threonine-protein kinase domain (InterPro:IPR002290), Serine-threonine/tyrosine-protein kinase (InterPro:IPR001245), Protein kinase-like domain (InterPro:IPR011009), Serine/threonine-protein kinase, active site (InterPro:IPR008271), Protein kinase, catalytic domain (Int…
	AT5G20830	0.640792	0	0	0	0	SUS1	sucrose synthase 1 (SUS1); FUNCTIONS IN: UDP-glycosyltransferase activity, sucrose synthase activity; INVOLVED IN: in 6 processes; LOCATED IN: cellular_component unknown; EXPRESSED IN: 31 plant structures; EXPRESSED DURING: 14 growth stages; CONTAINS InterPro DOMAIN/s: Sucrose synthase, plant/cyanobacteria (InterPro:IPR012820), Sucrose synthase (InterPro:IPR000368), Glycosyl transferase, group 1 …
	AT1G77120	0.532095	0	0	0	0	ADH1	alcohol dehydrogenase 1 (ADH1); FUNCTIONS IN: alcohol dehydrogenase (NAD) activity; INVOLVED IN: response to cadmium ion, cellular respiration, response to salt stress, response to hypoxia, response to osmotic stress; LOCATED IN: cytosol, plasma membrane; EXPRESSED IN: 24 plant structures; EXPRESSED DURING: 12 growth stages; CONTAINS InterPro DOMAIN/s: GroES-like (InterPro:IPR011032), Alcohol deh…
	AT3G24715	0.452007	0	0	0	0	AT3G24715	Protein kinase superfamily protein with octicosapeptide/Phox/Bem1p domain; FUNCTIONS IN: protein serine/threonine kinase activity, protein kinase activity, ATP binding; INVOLVED IN: protein amino acid phosphorylation; EXPRESSED IN: 12 plant structures; EXPRESSED DURING: 4 anthesis, LP.10 ten leaves visible, C globular stage, petal differentiation and expansion stage; CONTAINS InterPro DOMAIN/s: O…
i	AT5G57560	-2.4445	0	-0.729278	0	0	TCH4	Touch 4 (TCH4); CONTAINS InterPro DOMAIN/s: Xyloglucan endotransglucosylase/hydrolase (InterPro:IPR016455), Xyloglucan endo-transglycosylase, C-terminal (InterPro:IPR010713), Concanavalin A-like lectin/glucanase, subgroup (InterPro:IPR013320), Concanavalin A-like lectin/glucanase (InterPro:IPR008985), Glycoside hydrolase, family 16 (InterPro:IPR000757), Glycoside hydrolase, family 16, active site…
	AT4G29780	-2.14798	0	-0.842789	0	0	AT4G29780	unknown protein; BEST Arabidopsis thaliana protein match is: unknown protein (TAIR:AT5G12010.1); Has 945 Blast hits to 944 proteins in 87 species: Archae - 0; Bacteria - 0; Metazoa - 519; Fungi - 43; Plants - 365; Viruses - 0; Other Eukaryotes - 18 (source: NCBI BLink).
	AT5G35735	-1.13754	0	-0.489137	0	0	AT5G35735	Auxin-responsive family protein; LOCATED IN: plasma membrane, membrane; EXPRESSED IN: 21 plant structures; EXPRESSED DURING: 12 growth stages; CONTAINS InterPro DOMAIN/s: Cytochrome b561, eukaryote (InterPro:IPR004877), Uncharacterised conserved protein UCP037471 (InterPro:IPR017214), Protein of unknown function DUF568, DOMON-like (InterPro:IPR007613), DOMON related (InterPro:IPR005018), Cytochro…
	AT2G36220	-1.04098	0	-0.585502	0	0	AT2G36220	unknown protein; BEST Arabidopsis thaliana protein match is: unknown protein (TAIR:AT3G52710.1); Has 74 Blast hits to 74 proteins in 10 species: Archae - 0; Bacteria - 0; Metazoa - 0; Fungi - 0; Plants - 74; Viruses - 0; Other Eukaryotes - 0 (source: NCBI BLink).
	AT1G61340	-1.614	0	-0.951635	0	0	FBS1	F-box family protein; CONTAINS InterPro DOMAIN/s: F-box domain, cyclin-like (InterPro:IPR001810); BEST Arabidopsis thaliana protein match is: F-box family protein (TAIR:AT4G05010.1); Has 91 Blast hits to 91 proteins in 14 species: Archae - 0; Bacteria - 0; Metazoa - 0; Fungi - 0; Plants - 91; Viruses - 0; Other Eukaryotes - 0 (source: NCBI BLink).
	AT4G27280	-1.32561	0	-0.653862	0	0	AT4G27280	Calcium-binding EF-hand family protein; FUNCTIONS IN: calcium ion binding; INVOLVED IN: response to karrikin; EXPRESSED IN: 23 plant structures; EXPRESSED DURING: 13 growth stages; CONTAINS InterPro DOMAIN/s: EF-Hand 1, calcium-binding site (InterPro:IPR018247), EF-HAND 2 (InterPro:IPR018249), EF-hand-like domain (InterPro:IPR011992); BEST Arabidopsis thaliana protein match is: pinoid-binding pro…
	AT5G05410	-2.14758	0	-1.06277	0	0	DREB2A	DRE-binding protein 2A (DREB2A); CONTAINS InterPro DOMAIN/s: DNA-binding, integrase-type (InterPro:IPR016177), Pathogenesis-related transcriptional factor/ERF, DNA-binding (InterPro:IPR001471); BEST Arabidopsis thaliana protein match is: DRE/CRT-binding protein 2B (TAIR:AT3G11020.1); Has 1807 Blast hits to 1807 proteins in 277 species: Archae - 0; Bacteria - 0; Metazoa - 736; Fungi - 347; Plants …
	AT4G24570	-2.31546	0	-1.18139	0	0	DIC2	dicarboxylate carrier 2 (DIC2); FUNCTIONS IN: binding, dicarboxylic acid transmembrane transporter activity; INVOLVED IN: transport, mitochondrial transport; LOCATED IN: mitochondrial inner membrane, membrane; EXPRESSED IN: 24 plant structures; EXPRESSED DURING: 14 growth stages; CONTAINS InterPro DOMAIN/s: Mitochondrial carrier protein (InterPro:IPR002067), Mitochondrial substrate carrier (Inter…
	AT1G74310	-1.01175	0	-0.64944	0	0	HSP101	heat shock protein 101 (HSP101); FUNCTIONS IN: protein binding, ATPase activity, ATP binding; INVOLVED IN: response to high light intensity, response to hydrogen peroxide, response to heat, protein unfolding; EXPRESSED IN: 12 plant structures; EXPRESSED DURING: 6 growth stages; CONTAINS InterPro DOMAIN/s: Clp ATPase, C-terminal (InterPro:IPR019489), ATPase, AAA+ type, core (InterPro:IPR003593), A…
	AT4G24160	-0.599985	0	-0.423561	0	0	AT4G24160	alpha/beta-Hydrolases superfamily protein; CONTAINS InterPro DOMAIN/s: Alpha/beta hydrolase fold-1 (InterPro:IPR000073); BEST Arabidopsis thaliana protein match is: alpha/beta-Hydrolases superfamily protein (TAIR:AT1G64670.1); Has 13697 Blast hits to 13658 proteins in 1951 species: Archae - 114; Bacteria - 10198; Metazoa - 427; Fungi - 417; Plants - 428; Viruses - 0; Other Eukaryotes - 2113 (sour…
	AT4G27657	-2.63086	0	-1.77191	0	0	AT4G27657	unknown protein; FUNCTIONS IN: molecular_function unknown; INVOLVED IN: biological_process unknown; LOCATED IN: endomembrane system; EXPRESSED IN: 15 plant structures; EXPRESSED DURING: 9 growth stages; BEST Arabidopsis thaliana protein match is: unknown protein (TAIR:AT5G54145.1); Has 30201 Blast hits to 17322 proteins in 780 species: Archae - 12; Bacteria - 1396; Metazoa - 17338; Fungi - 3422; …
	AT1G72940	-1.22863	0	-1.23449	0	0	AT1G72940	Toll-Interleukin-Resistance (TIR) domain-containing protein; FUNCTIONS IN: transmembrane receptor activity, ATP binding; INVOLVED IN: signal transduction, defense response, apoptosis, innate immune response; LOCATED IN: intrinsic to membrane; EXPRESSED IN: 22 plant structures; EXPRESSED DURING: 13 growth stages; CONTAINS InterPro DOMAIN/s: NB-ARC (InterPro:IPR002182), Toll-Interleukin receptor (I…
	AT1G78070	-1.17368	0	-0.980404	0	0	AT1G78070	Transducin/WD40 repeat-like superfamily protein; CONTAINS InterPro DOMAIN/s: WD40 repeat 2 (InterPro:IPR019782), WD40 repeat-like-containing domain (InterPro:IPR011046), WD40 repeat, conserved site (InterPro:IPR019775), WD40-repeat-containing domain (InterPro:IPR017986), WD40/YVTN repeat-like-containing domain (InterPro:IPR015943), WD40 repeat (InterPro:IPR001680), WD40 repeat, subgroup (InterPro…
	AT3G24500	-2.1699	0	-1.3655	0	-1.22175	MBF1C	multiprotein bridging factor 1C (MBF1C); CONTAINS InterPro DOMAIN/s: Lambda repressor-like, DNA-binding (InterPro:IPR010982), Multiprotein bridging factor 1, N-terminal (InterPro:IPR013729), Helix-turn-helix type 3 (InterPro:IPR001387); BEST Arabidopsis thaliana protein match is: multiprotein bridging factor 1B (TAIR:AT3G58680.1); Has 715 Blast hits to 715 proteins in 278 species: Archae - 65; Ba…

## Sheet: Shoot-hypoxia
Supplemental Table S6. Lists of root and shoot DEGs associated with GO:0001666 (Response to Hypoxia). These DEGs were clustered based on consistent expression patterns across the five genotypes used in APEX08 (Figure 5B). Organ-specific expression responses to spaceflight conditions are shown for the 5 genotypes included in APEX08. The results of GO- and transcription-factor target enrichment ana…
	Gene ID	Shoot
		Col	adc1	OXCuAO3	cdr7/cuao3	OXPtADC	Symbol	Annotation
a	AT1G43800	2.85812	1.90005	1.13501	3.1464	2.27507	FTM1	Plant stearoyl-acyl-carrier-protein desaturase family protein; FUNCTIONS IN: acyl-[acyl-carrier-protein] desaturase activity, oxidoreductase activity, transition metal ion binding; INVOLVED IN: oxidation reduction, fatty acid metabolic process, fatty acid biosynthetic process; LOCATED IN: membrane; EXPRESSED IN: 9 plant structures; EXPRESSED DURING: 6 growth stages; CONTAINS InterPro DOMAIN/s: Ri…
	AT1G77120	2.11262	1.52109	1.09798	0	1.65078	ADH1	alcohol dehydrogenase 1 (ADH1); FUNCTIONS IN: alcohol dehydrogenase (NAD) activity; INVOLVED IN: response to cadmium ion, cellular respiration, response to salt stress, response to hypoxia, response to osmotic stress; LOCATED IN: cytosol, plasma membrane; EXPRESSED IN: 24 plant structures; EXPRESSED DURING: 12 growth stages; CONTAINS InterPro DOMAIN/s: GroES-like (InterPro:IPR011032), Alcohol deh…
	AT1G30720	2.3978	3.51346	2.55446	0	2.56619	AT1G30720	FAD-binding Berberine family protein; FUNCTIONS IN: electron carrier activity, oxidoreductase activity, FAD binding, catalytic activity; LOCATED IN: endomembrane system; CONTAINS InterPro DOMAIN/s: FAD-binding, type 2 (InterPro:IPR016166), Berberine/berberine-like (InterPro:IPR012951), FAD linked oxidase, N-terminal (InterPro:IPR006094); BEST Arabidopsis thaliana protein match is: FAD-binding Ber…
	AT1G26380	4.45471	3.36405	2.93212	2.98345	2.20715	AT1G26380	FAD-binding Berberine family protein; FUNCTIONS IN: electron carrier activity, oxidoreductase activity, FAD binding, catalytic activity; LOCATED IN: endomembrane system; EXPRESSED IN: 9 plant structures; EXPRESSED DURING: LP.06 six leaves visible, LP.04 four leaves visible, 4 anthesis, LP.08 eight leaves visible; CONTAINS InterPro DOMAIN/s: FAD-binding, type 2 (InterPro:IPR016166), Berberine/berb…
	AT5G39890	3.69879	3.43404	2.65957	3.09986	2.15757	AT5G39890	Protein of unknown function (DUF1637); FUNCTIONS IN: cysteamine dioxygenase activity; INVOLVED IN: oxidation reduction; LOCATED IN: cellular_component unknown; EXPRESSED IN: 24 plant structures; EXPRESSED DURING: 15 growth stages; CONTAINS InterPro DOMAIN/s: Protein of unknown function DUF1637 (InterPro:IPR012864); BEST Arabidopsis thaliana protein match is: Protein of unknown function (DUF1637) …
	AT2G16060	2.54847	2.60053	2.61328	3.38517	2.14529	HB1	hemoglobin 1 (HB1); FUNCTIONS IN: oxygen binding; INVOLVED IN: response to hypoxia; LOCATED IN: cell wall, plasma membrane; EXPRESSED IN: 22 plant structures; EXPRESSED DURING: 14 growth stages; CONTAINS InterPro DOMAIN/s: Leghaemoglobin (InterPro:IPR001032), Globin-like (InterPro:IPR009050), Leghaemoglobin, iron-binding site (InterPro:IPR019824), Globin, subset (InterPro:IPR000971), Globin (Inte…
	AT3G02040	2.08585	2.15427	2.4049	1.78341	2.20635	SRG3	senescence-related gene 3 (SRG3); FUNCTIONS IN: phosphoric diester hydrolase activity, glycerophosphodiester phosphodiesterase activity; INVOLVED IN: glycerol metabolic process, lipid metabolic process; EXPRESSED IN: 18 plant structures; EXPRESSED DURING: 8 growth stages; CONTAINS InterPro DOMAIN/s: PLC-like phosphodiesterase, TIM beta/alpha-barrel domain (InterPro:IPR017946), Glycerophosphoryl d…
	AT3G10040	2.37213	2.70588	2.03262	2.49919	2.16516	AT3G10040	sequence-specific DNA binding transcription factors; BEST Arabidopsis thaliana protein match is: unknown protein (TAIR:AT1G76870.1); Has 3136 Blast hits to 1955 proteins in 249 species: Archae - 4; Bacteria - 147; Metazoa - 846; Fungi - 267; Plants - 330; Viruses - 57; Other Eukaryotes - 1485 (source: NCBI BLink).
	AT3G27220	1.54738	2.03203	1.77216	1.63465	1.31535	AT3G27220	Galactose oxidase/kelch repeat superfamily protein; CONTAINS InterPro DOMAIN/s: Galactose oxidase/kelch, beta-propeller (InterPro:IPR011043), Kelch related (InterPro:IPR013089), Kelch-type beta propeller (InterPro:IPR015915); BEST Arabidopsis thaliana protein match is: Galactose oxidase/kelch repeat superfamily protein (TAIR:AT1G51540.1); Has 1505 Blast hits to 1317 proteins in 198 species: Archa…
	AT4G19880	1.0891	1.36377	1.4192	1.06805	1.17673	AT4G19880	Glutathione S-transferase family protein; FUNCTIONS IN: molecular_function unknown; INVOLVED IN: response to cadmium ion; LOCATED IN: chloroplast; EXPRESSED IN: 23 plant structures; EXPRESSED DURING: 13 growth stages; CONTAINS InterPro DOMAIN/s: Glutathione S-transferase, predicted (InterPro:IPR016639), Glutathione S-transferase, C-terminal (InterPro:IPR004046), Glutathione S-transferase, C-termi…
	AT1G33055	4.38742	5.29068	4.91432	4.38742	3.77345	AT1G33055	unknown protein; FUNCTIONS IN: molecular_function unknown; INVOLVED IN: anaerobic respiration; LOCATED IN: endomembrane system; EXPRESSED IN: 13 plant structures; EXPRESSED DURING: 6 growth stages; Has 20 Blast hits to 20 proteins in 8 species: Archae - 0; Bacteria - 0; Metazoa - 0; Fungi - 0; Plants - 20; Viruses - 0; Other Eukaryotes - 0 (source: NCBI BLink).
	AT4G24230	2.46922	2.66656	2.98346	2.63125	2.02124	ACBP3	acyl-CoA-binding domain 3 (ACBP3); FUNCTIONS IN: acyl-CoA binding; INVOLVED IN: fatty acid transport; LOCATED IN: extracellular region; EXPRESSED IN: 6 plant structures; CONTAINS InterPro DOMAIN/s: Acyl-CoA-binding protein, ACBP (InterPro:IPR000582), FERM/acyl-CoA-binding protein, 3-helical bundle (InterPro:IPR014352); BEST Arabidopsis thaliana protein match is: acyl-CoA binding protein 2 (TAIR:A…
	AT5G19120	2.18015	2.52526	2.88855	2.52451	2.09212	AT5G19120	Eukaryotic aspartyl protease family protein; FUNCTIONS IN: aspartic-type endopeptidase activity; INVOLVED IN: proteolysis; LOCATED IN: endomembrane system; EXPRESSED IN: 24 plant structures; EXPRESSED DURING: 13 growth stages; CONTAINS InterPro DOMAIN/s: Peptidase aspartic (InterPro:IPR021109), Peptidase aspartic, catalytic (InterPro:IPR009007), Peptidase A1 (InterPro:IPR001461); BEST Arabidopsis…
	AT4G38470	1.54665	1.87593	2.0059	1.50733	1.23171	STY46	ACT-like protein tyrosine kinase family protein; FUNCTIONS IN: protein serine/threonine/tyrosine kinase activity, protein kinase activity; INVOLVED IN: protein amino acid phosphorylation, metabolic process; LOCATED IN: cytosol; EXPRESSED IN: 25 plant structures; EXPRESSED DURING: 15 growth stages; CONTAINS InterPro DOMAIN/s: Serine/threonine-protein kinase domain (InterPro:IPR002290), Amino acid-…
	AT5G20250	2.56603	2.64209	2.74494	2.81222	2.38971	DIN10	DARK INDUCIBLE 10 (DIN10); FUNCTIONS IN: hydrolase activity, hydrolyzing O-glycosyl compounds; INVOLVED IN: response to karrikin, aging, response to light stimulus, response to cold, response to sucrose stimulus; LOCATED IN: chloroplast; EXPRESSED IN: 25 plant structures; EXPRESSED DURING: 14 growth stages; CONTAINS InterPro DOMAIN/s: Glycoside hydrolase, catalytic core (InterPro:IPR017853), Raff…
	AT2G31810	1.72102	1.58756	1.76718	1.94088	1.36712	AT2G31810	ACT domain-containing small subunit of acetolactate synthase protein; FUNCTIONS IN: acetolactate synthase activity, amino acid binding; INVOLVED IN: branched chain family amino acid biosynthetic process; LOCATED IN: chloroplast; EXPRESSED IN: 24 plant structures; EXPRESSED DURING: 13 growth stages; CONTAINS InterPro DOMAIN/s: Acetolactate synthase, small subunit (InterPro:IPR004789), Amino acid-b…
	AT1G55810	1.57092	1.4864	1.43796	1.77268	1.21708	UKL3	uridine kinase-like 3 (UKL3); FUNCTIONS IN: uracil phosphoribosyltransferase activity, phosphotransferase activity, alcohol group as acceptor, kinase activity, ATP binding; INVOLVED IN: biosynthetic process, metabolic process; LOCATED IN: cellular_component unknown; EXPRESSED IN: 22 plant structures; EXPRESSED DURING: 13 growth stages; CONTAINS InterPro DOMAIN/s: Phosphoribulokinase/uridine kinas…
	AT5G64260	1.43429	1.45364	1.57729	1.29694	1.03759	EXL2	EXORDIUM like 2 (EXL2); FUNCTIONS IN: molecular_function unknown; INVOLVED IN: biological_process unknown; LOCATED IN: cell wall, plant-type cell wall; EXPRESSED IN: 23 plant structures; EXPRESSED DURING: 13 growth stages; CONTAINS InterPro DOMAIN/s: Phosphate-induced protein 1 (InterPro:IPR006766); BEST Arabidopsis thaliana protein match is: EXORDIUM like 4 (TAIR:AT5G09440.1); Has 1807 Blast hit…
	AT2G18670	1.87264	1.36626	1.63084	1.81596	1.49838	AT2G18670	RING/U-box superfamily protein; FUNCTIONS IN: zinc ion binding; EXPRESSED IN: 21 plant structures; EXPRESSED DURING: 14 growth stages; CONTAINS InterPro DOMAIN/s: Zinc finger, RING-type (InterPro:IPR001841), Zinc finger, C3HC4 RING-type (InterPro:IPR018957); BEST Arabidopsis thaliana protein match is: RING/U-box superfamily protein (TAIR:AT4G30370.1); Has 8378 Blast hits to 8356 proteins in 272 s…
	AT5G03730	1.11053	0.925224	1.03299	1.00685	0.740161	CTR1	CONSTITUTIVE TRIPLE RESPONSE 1 (CTR1); CONTAINS InterPro DOMAIN/s: Protein kinase, ATP binding site (InterPro:IPR017441), Serine/threonine-protein kinase domain (InterPro:IPR002290), Serine-threonine/tyrosine-protein kinase (InterPro:IPR001245), Protein kinase-like domain (InterPro:IPR011009), Serine/threonine-protein kinase, active site (InterPro:IPR008271), Protein kinase, catalytic domain (Int…
	AT3G23150	1.38532	1.15952	1.83477	1.5637	1.39903	ETR2	ethylene response 2 (ETR2); FUNCTIONS IN: ethylene binding, protein histidine kinase activity, receptor activity, glycogen synthase kinase 3 activity; INVOLVED IN: negative regulation of ethylene mediated signaling pathway; LOCATED IN: endomembrane system, endoplasmic reticulum membrane, membrane; EXPRESSED IN: 22 plant structures; EXPRESSED DURING: 7 growth stages; CONTAINS InterPro DOMAIN/s: Si…
	AT2G15890	2.34691	2.23377	2.84466	2.22094	2.13815	MEE14	maternal effect embryo arrest 14 (MEE14); FUNCTIONS IN: molecular_function unknown; INVOLVED IN: defense response to fungus, embryo development ending in seed dormancy; LOCATED IN: chloroplast; EXPRESSED IN: 22 plant structures; EXPRESSED DURING: 13 growth stages; Has 87 Blast hits to 87 proteins in 44 species: Archae - 0; Bacteria - 0; Metazoa - 0; Fungi - 0; Plants - 85; Viruses - 0; Other Euka…
	AT3G20770	0.717922	0.590367	0.764152	0.804611	0.601454	EIN3	ETHYLENE-INSENSITIVE3 (EIN3); CONTAINS InterPro DOMAIN/s: Ethylene insensitive 3 (InterPro:IPR006957); BEST Arabidopsis thaliana protein match is: ETHYLENE-INSENSITIVE3-like 1 (TAIR:AT2G27050.1); Has 12681 Blast hits to 4386 proteins in 108 species: Archae - 12; Bacteria - 9; Metazoa - 78; Fungi - 631; Plants - 331; Viruses - 0; Other Eukaryotes - 11620 (source: NCBI BLink).
	AT5G15120	2.75753	2.8606	3.37257	2.65035	2.07398	AT5G15120	Protein of unknown function (DUF1637); FUNCTIONS IN: cysteamine dioxygenase activity; INVOLVED IN: anaerobic respiration; LOCATED IN: cellular_component unknown; EXPRESSED IN: 20 plant structures; EXPRESSED DURING: 8 growth stages; CONTAINS InterPro DOMAIN/s: Protein of unknown function DUF1637 (InterPro:IPR012864); BEST Arabidopsis thaliana protein match is: Protein of unknown function (DUF1637)…
	AT4G27450	3.78159	3.58038	4.09953	4.17638	3.20552	AT4G27450	Aluminium induced protein with YGL and LRDR motifs; FUNCTIONS IN: molecular_function unknown; INVOLVED IN: biological_process unknown; LOCATED IN: cytosol, nucleus, plasma membrane; EXPRESSED IN: 25 plant structures; EXPRESSED DURING: 14 growth stages; BEST Arabidopsis thaliana protein match is: Aluminium induced protein with YGL and LRDR motifs (TAIR:AT3G15450.1); Has 30201 Blast hits to 17322 p…
	AT3G14230	1.11461	1.13957	1.28	1.35968	1.13168	RAP2.2	related to AP2 2 (RAP2.2); CONTAINS InterPro DOMAIN/s: DNA-binding, integrase-type (InterPro:IPR016177), Pathogenesis-related transcriptional factor/ERF, DNA-binding (InterPro:IPR001471); BEST Arabidopsis thaliana protein match is: related to AP2 12 (TAIR:AT1G53910.2); Has 6244 Blast hits to 5852 proteins in 259 species: Archae - 0; Bacteria - 2; Metazoa - 0; Fungi - 0; Plants - 6195; Viruses - 4…
	AT4G27460	1.90535	2.2183	3.18452	2.78151	2.59816	CBSX5	Cystathionine beta-synthase (CBS) family protein; CONTAINS InterPro DOMAIN/s: Cystathionine beta-synthase, core (InterPro:IPR000644); BEST Arabidopsis thaliana protein match is: CBS domain-containing protein (TAIR:AT5G53750.1); Has 145 Blast hits to 145 proteins in 17 species: Archae - 0; Bacteria - 0; Metazoa - 1; Fungi - 0; Plants - 144; Viruses - 0; Other Eukaryotes - 0 (source: NCBI BLink).
	AT1g10140	1.37038	1.67264	2.26538	1.54162	1.41604	AT1G10140	Uncharacterised conserved protein UCP031279; FUNCTIONS IN: molecular_function unknown; INVOLVED IN: biological_process unknown; LOCATED IN: plasma membrane; EXPRESSED IN: 23 plant structures; EXPRESSED DURING: 13 growth stages; CONTAINS InterPro DOMAIN/s: Uncharacterised conserved protein UCP031279 (InterPro:IPR016972); BEST Arabidopsis thaliana protein match is: Uncharacterised conserved protein…
	AT4G32480	1.42046	2.08046	2.47051	1.57838	1.78032	AT4G32480	Protein of unknown function (DUF506) ; FUNCTIONS IN: molecular_function unknown; INVOLVED IN: biological_process unknown; LOCATED IN: cellular_component unknown; EXPRESSED IN: cultured cell; CONTAINS InterPro DOMAIN/s: Protein of unknown function DUF506, plant (InterPro:IPR006502); BEST Arabidopsis thaliana protein match is: Protein of unknown function (DUF506) (TAIR:AT2G20670.1); Has 1807 Blast …
	AT3G10020	1.00945	1.57589	1.88279	1.02209	1.19144	AT3G10020	unknown protein; FUNCTIONS IN: molecular_function unknown; INVOLVED IN: response to oxidative stress, anaerobic respiration; LOCATED IN: cellular_component unknown; EXPRESSED IN: 23 plant structures; EXPRESSED DURING: 13 growth stages; Has 47 Blast hits to 47 proteins in 12 species: Archae - 0; Bacteria - 0; Metazoa - 1; Fungi - 0; Plants - 46; Viruses - 0; Other Eukaryotes - 0 (source: NCBI BLin…
	AT3G02550	2.51623	3.87131	3.4092	2.86377	2.88306	LBD41	LOB domain-containing protein 41 (LBD41); CONTAINS InterPro DOMAIN/s: Lateral organ boundaries, LOB (InterPro:IPR004883), Asymmetric leaves, AS2/LOB (InterPro:IPR017414); BEST Arabidopsis thaliana protein match is: LOB domain-containing protein 40 (TAIR:AT1G67100.1); Has 601 Blast hits to 600 proteins in 23 species: Archae - 0; Bacteria - 0; Metazoa - 0; Fungi - 0; Plants - 601; Viruses - 0; Othe…
	AT3G07350	1.46129	2.04031	2.31358	1.6331	2.08879	F21O3.6	Protein of unknown function (DUF506) ; CONTAINS InterPro DOMAIN/s: Protein of unknown function DUF506, plant (InterPro:IPR006502); BEST Arabidopsis thaliana protein match is: Protein of unknown function (DUF506) (TAIR:AT3G25240.1); Has 393 Blast hits to 390 proteins in 24 species: Archae - 0; Bacteria - 0; Metazoa - 0; Fungi - 0; Plants - 391; Viruses - 0; Other Eukaryotes - 2 (source: NCBI BLink…
	AT1G25550	0.688647	0.984733	1.01431	0.988444	0.916165	AT1G25550	myb-like transcription factor family protein; CONTAINS InterPro DOMAIN/s: Homeodomain-like (InterPro:IPR009057), Myb, DNA-binding (InterPro:IPR014778), Myb-like DNA-binding domain, SHAQKYF class (InterPro:IPR006447), HTH transcriptional regulator, Myb-type, DNA-binding (InterPro:IPR017930), Homeodomain-related (InterPro:IPR012287); BEST Arabidopsis thaliana protein match is: myb-like transcriptio…
	AT1G72330	0.540338	0.729292	0.772975	0.635097	0.712484	ALAAT2	alanine aminotransferase 2 (ALAAT2); FUNCTIONS IN: copper ion binding, L-alanine:2-oxoglutarate aminotransferase activity, ATP binding; INVOLVED IN: glycolysis, biosynthetic process, L-alanine biosynthetic process from pyruvate, L-alanine catabolic process, by transamination; LOCATED IN: mitochondrion; CONTAINS InterPro DOMAIN/s: 1-aminocyclopropane-1-carboxylate synthase (InterPro:IPR001176), Py…
	AT3G30775	1.58913	1.45643	1.21063	1.68695	0.994224	ERD5	EARLY RESPONSIVE TO DEHYDRATION 5 (ERD5); CONTAINS InterPro DOMAIN/s: Proline dehydrogenase (InterPro:IPR002872), Proline oxidase (InterPro:IPR015659); BEST Arabidopsis thaliana protein match is: Methylenetetrahydrofolate reductase family protein (TAIR:AT5G38710.1); Has 2269 Blast hits to 2250 proteins in 878 species: Archae - 1; Bacteria - 1355; Metazoa - 205; Fungi - 217; Plants - 85; Viruses -…
	AT1G66180	1.18854	0.916195	0.91622	1.23998	1.20814	AT1G66180	Eukaryotic aspartyl protease family protein; FUNCTIONS IN: aspartic-type endopeptidase activity; INVOLVED IN: proteolysis; LOCATED IN: endomembrane system; EXPRESSED IN: 22 plant structures; EXPRESSED DURING: 13 growth stages; CONTAINS InterPro DOMAIN/s: Peptidase aspartic (InterPro:IPR021109), Peptidase aspartic, catalytic (InterPro:IPR009007), Peptidase A1 (InterPro:IPR001461); BEST Arabidopsis…
	AT3G58670	0.559079	0	0.689074	0.764012	0.717527	AT3G58670	Protein of unknown function (DUF1637); FUNCTIONS IN: cysteamine dioxygenase activity; INVOLVED IN: oxidation reduction; LOCATED IN: cellular_component unknown; EXPRESSED IN: 23 plant structures; EXPRESSED DURING: 12 growth stages; CONTAINS InterPro DOMAIN/s: Protein of unknown function DUF1637 (InterPro:IPR012864); BEST Arabidopsis thaliana protein match is: Protein of unknown function (DUF1637) …
	AT4G20380	0.719461	0	0.611183	0.663228	0	LSD1	LESION SIMULATING DISEASE (LSD1); CONTAINS InterPro DOMAIN/s: Zinc finger, LSD1-type (InterPro:IPR005735); BEST Arabidopsis thaliana protein match is: lsd one like 1 (TAIR:AT1G32540.1); Has 361 Blast hits to 293 proteins in 54 species: Archae - 0; Bacteria - 0; Metazoa - 49; Fungi - 0; Plants - 249; Viruses - 0; Other Eukaryotes - 63 (source: NCBI BLink).
b	AT4G01360	0	1.3422	0	0	0	BPS3	unknown protein; BEST Arabidopsis thaliana protein match is: Protein of unknown function (DUF793) (TAIR:AT1G01550.2); Has 99 Blast hits to 99 proteins in 25 species: Archae - 0; Bacteria - 10; Metazoa - 0; Fungi - 0; Plants - 89; Viruses - 0; Other Eukaryotes - 0 (source: NCBI BLink).
	AT1G68690	0	0.929286	0	0	0	PERK9	Protein kinase superfamily protein; FUNCTIONS IN: protein serine/threonine kinase activity, protein kinase activity, ATP binding; INVOLVED IN: protein amino acid phosphorylation; LOCATED IN: chloroplast; EXPRESSED IN: 13 plant structures; EXPRESSED DURING: LP.06 six leaves visible, LP.04 four leaves visible, 4 anthesis, petal differentiation and expansion stage; CONTAINS InterPro DOMAIN/s: Protei…
	AT2G46500	0	0.404248	0	0	0	PI4K GAMMA 4	phosphoinositide 4-kinase gamma 4 (PI4K GAMMA 4); CONTAINS InterPro DOMAIN/s: Phosphatidylinositol 3-/4-kinase, catalytic (InterPro:IPR000403), Ubiquitin subgroup (InterPro:IPR019956), Ubiquitin (InterPro:IPR000626), Ubiquitin supergroup (InterPro:IPR019955); BEST Arabidopsis thaliana protein match is: Phosphatidylinositol 3- and 4-kinase ;Ubiquitin family protein (TAIR:AT5G24240.1); Has 12754 Bl…
	AT4G34131	0	1.37591	0	0	0	UGT73B3	UDP-glucosyl transferase 73B3 (UGT73B3); FUNCTIONS IN: transferase activity, transferring hexosyl groups, quercetin 3-O-glucosyltransferase activity, UDP-glycosyltransferase activity, UDP-glucosyltransferase activity; INVOLVED IN: response to cyclopentenone, response to other organism; LOCATED IN: endomembrane system; CONTAINS InterPro DOMAIN/s: UDP-glucuronosyl/UDP-glucosyltransferase (InterPro:…
	AT5G20830	0	0.589452	0	0	0	SUS1	sucrose synthase 1 (SUS1); FUNCTIONS IN: UDP-glycosyltransferase activity, sucrose synthase activity; INVOLVED IN: in 6 processes; LOCATED IN: cellular_component unknown; EXPRESSED IN: 31 plant structures; EXPRESSED DURING: 14 growth stages; CONTAINS InterPro DOMAIN/s: Sucrose synthase, plant/cyanobacteria (InterPro:IPR012820), Sucrose synthase (InterPro:IPR000368), Glycosyl transferase, group 1 …
	AT5G66650	0	0.704774	0	0	0	AT5G66650	Protein of unknown function (DUF607); CONTAINS InterPro DOMAIN/s: Protein of unknown function DUF607 (InterPro:IPR006769); BEST Arabidopsis thaliana protein match is: Protein of unknown function (DUF607) (TAIR:AT2G23790.1); Has 1807 Blast hits to 1807 proteins in 277 species: Archae - 0; Bacteria - 0; Metazoa - 736; Fungi - 347; Plants - 385; Viruses - 0; Other Eukaryotes - 339 (source: NCBI BLin…
c	AT5G41080	1.57603	2.14603	1.89162	0	0	GDPD2	PLC-like phosphodiesterases superfamily protein; FUNCTIONS IN: phosphoric diester hydrolase activity, glycerophosphodiester phosphodiesterase activity; INVOLVED IN: glycerol metabolic process, lipid metabolic process; EXPRESSED IN: 23 plant structures; EXPRESSED DURING: 14 growth stages; CONTAINS InterPro DOMAIN/s: PLC-like phosphodiesterase, TIM beta/alpha-barrel domain (InterPro:IPR017946), Gly…
	AT5G19550	0.843895	0.874251	0.7549	0	0	ASP2	aspartate aminotransferase 2 (ASP2); FUNCTIONS IN: L-aspartate:2-oxoglutarate aminotransferase activity, copper ion binding; INVOLVED IN: nitrogen compound metabolic process; LOCATED IN: cytosol, cell wall, plasma membrane; EXPRESSED IN: 26 plant structures; EXPRESSED DURING: 14 growth stages; CONTAINS InterPro DOMAIN/s: Aminotransferase, class I/classII (InterPro:IPR004839), Pyridoxal phosphate-…
	AT1G13300	1.38555	1.44955	1.69656	0	0	HRS1	HYPERSENSITIVITY TO LOW PI-ELICITED PRIMARY ROOT SHORTENING 1 (HRS1); CONTAINS InterPro DOMAIN/s: Homeodomain-like (InterPro:IPR009057), Myb, DNA-binding (InterPro:IPR014778), HTH transcriptional regulator, Myb-type, DNA-binding (InterPro:IPR017930), Myb-like DNA-binding domain, SHAQKYF class (InterPro:IPR006447), Homeodomain-related (InterPro:IPR012287); BEST Arabidopsis thaliana protein match i…
	AT1G72360	0.870354	0.998069	1.03138	0	0	ERF73	HYPOXIA RESPONSIVE ERF (ETHYLENE RESPONSE FACTOR) 1 (HRE1); CONTAINS InterPro DOMAIN/s: DNA-binding, integrase-type (InterPro:IPR016177), Pathogenesis-related transcriptional factor/ERF, DNA-binding (InterPro:IPR001471); BEST Arabidopsis thaliana protein match is: Integrase-type DNA-binding superfamily protein (TAIR:AT2G47520.1); Has 6115 Blast hits to 5780 proteins in 251 species: Archae - 0; Ba…
	AT1G69890	1.15526	2.12328	2.3313	0	0	AT1G69890	CONTAINS InterPro DOMAIN/s: Protein of unknown function DUF569 (InterPro:IPR007679), Actin cross-linking (InterPro:IPR008999); BEST Arabidopsis thaliana protein match is: Actin cross-linking protein (TAIR:AT1G27100.1); Has 237 Blast hits to 216 proteins in 14 species: Archae - 0; Bacteria - 0; Metazoa - 0; Fungi - 0; Plants - 237; Viruses - 0; Other Eukaryotes - 0 (source: NCBI BLink).
	AT3G49780	0.871665	1.50804	1.45572	0	0	PSK4	phytosulfokine 4 precursor (PSK4); FUNCTIONS IN: growth factor activity; INVOLVED IN: cell proliferation, cell differentiation, response to wounding, organ morphogenesis; LOCATED IN: extracellular matrix; EXPRESSED IN: 25 plant structures; EXPRESSED DURING: 10 growth stages; CONTAINS InterPro DOMAIN/s: Phytosulfokine (InterPro:IPR009438); BEST Arabidopsis thaliana protein match is: phytosulfokine…
	AT1G68670	0.405206	0.753187	0.694127	0	0	AT1G68670	myb-like transcription factor family protein; CONTAINS InterPro DOMAIN/s: Homeodomain-like (InterPro:IPR009057), Myb, DNA-binding (InterPro:IPR014778), HTH transcriptional regulator, Myb-type, DNA-binding (InterPro:IPR017930), Myb-like DNA-binding domain, SHAQKYF class (InterPro:IPR006447), Homeodomain-related (InterPro:IPR012287); BEST Arabidopsis thaliana protein match is: myb-like transcriptio…
	AT4G30280	0.708203	1.83548	1.86262	0	0	XTH18	xyloglucan endotransglucosylase/hydrolase 18 (XTH18); FUNCTIONS IN: hydrolase activity, acting on glycosyl bonds, xyloglucan endotransglucosylase activity; INVOLVED IN: xyloglucan metabolic process; LOCATED IN: endomembrane system, apoplast, cell wall; EXPRESSED IN: 13 plant structures; EXPRESSED DURING: 7 growth stages; CONTAINS InterPro DOMAIN/s: Xyloglucan endotransglucosylase/hydrolase (Inter…
d	AT2G26560	2.70837	2.95649	4.03346	2.57627	1.36051	PLA2A	phospholipase A 2A (PLA2A); FUNCTIONS IN: lipase activity, nutrient reservoir activity; INVOLVED IN: in 6 processes; LOCATED IN: membrane, cytoplasm; EXPRESSED IN: 11 plant structures; EXPRESSED DURING: 8 growth stages; CONTAINS InterPro DOMAIN/s: Acyl transferase/acyl hydrolase/lysophospholipase (InterPro:IPR016035), Patatin (InterPro:IPR002641); BEST Arabidopsis thaliana protein match is: Acyl …
	AT5G20230	1.80014	2.29152	2.86067	1.84133	0.963234	BCB	blue-copper-binding protein (BCB); FUNCTIONS IN: electron carrier activity, copper ion binding; INVOLVED IN: response to oxidative stress, response to salt stress, aluminum ion transport, response to wounding, response to absence of light; LOCATED IN: anchored to plasma membrane, plasma membrane, vacuole, anchored to membrane; EXPRESSED IN: 24 plant structures; EXPRESSED DURING: 12 growth stages;…
	AT5G57220	1.87299	2.73552	3.02254	1.6084	1.07176	CYP81F2	cytochrome P450, family 81, subfamily F, polypeptide 2 (CYP81F2); FUNCTIONS IN: electron carrier activity, monooxygenase activity, iron ion binding, oxygen binding, heme binding; INVOLVED IN: in 7 processes; LOCATED IN: endomembrane system; EXPRESSED IN: 8 plant structures; EXPRESSED DURING: 6 growth stages; CONTAINS InterPro DOMAIN/s: Cytochrome P450 (InterPro:IPR001128), Cytochrome P450, conser…
	AT1G03220	1.13617	1.37009	1.09712	0.991562	0.707567	AT1G03220	Eukaryotic aspartyl protease family protein; FUNCTIONS IN: aspartic-type endopeptidase activity; INVOLVED IN: response to salt stress; LOCATED IN: cell wall, plasma membrane, membrane, plant-type cell wall; EXPRESSED IN: 6 plant structures; CONTAINS InterPro DOMAIN/s: Peptidase aspartic (InterPro:IPR021109), Peptidase aspartic, catalytic (InterPro:IPR009007), Peptidase A1 (InterPro:IPR001461); BE…
	AT1G19530	4.15995	3.64416	3.61439	5.96683	0	AT1G19530	unknown protein; FUNCTIONS IN: molecular_function unknown; INVOLVED IN: N-terminal protein myristoylation, anaerobic respiration; LOCATED IN: cellular_component unknown; EXPRESSED IN: leaf apex, inflorescence meristem, hypocotyl, root, flower; EXPRESSED DURING: petal differentiation and expansion stage; Has 47 Blast hits to 47 proteins in 13 species: Archae - 0; Bacteria - 0; Metazoa - 0; Fungi -…
	AT3G06435	1.34144	1.17007	1.10926	1.80328	0	AT3G06435	Expressed protein; Has 35333 Blast hits to 34131 proteins in 2444 species: Archae - 798; Bacteria - 22429; Metazoa - 974; Fungi - 991; Plants - 531; Viruses - 0; Other Eukaryotes - 9610 (source: NCBI BLink).
	AT3G14100	0.53352	0.457032	0.549651	0.435786	0	AT3G14100	RNA-binding (RRM/RBD/RNP motifs) family protein; FUNCTIONS IN: mRNA 3'-UTR binding; EXPRESSED IN: 25 plant structures; EXPRESSED DURING: 14 growth stages; CONTAINS InterPro DOMAIN/s: RNA recognition motif, RNP-1 (InterPro:IPR000504), Nucleotide-binding, alpha-beta plait (InterPro:IPR012677); BEST Arabidopsis thaliana protein match is: oligouridylate-binding protein 1A (TAIR:AT1G54080.1); Has 3313…
	AT1G26270	0.745129	0.782472	0.692753	0.436731	0	AT1G26270	Phosphatidylinositol 3- and 4-kinase family protein; FUNCTIONS IN: inositol or phosphatidylinositol kinase activity, phosphotransferase activity, alcohol group as acceptor; LOCATED IN: cellular_component unknown; EXPRESSED IN: 23 plant structures; EXPRESSED DURING: 13 growth stages; CONTAINS InterPro DOMAIN/s: Phosphatidylinositol 3-/4-kinase, catalytic (InterPro:IPR000403); BEST Arabidopsis thal…
	AT1G53910	0.381382	0.419751	0.34842	0.32968	0	RAP2.12	related to AP2 12 (RAP2.12); FUNCTIONS IN: DNA binding, sequence-specific DNA binding transcription factor activity; INVOLVED IN: regulation of transcription, DNA-dependent; LOCATED IN: nucleus; EXPRESSED IN: 23 plant structures; EXPRESSED DURING: 14 growth stages; CONTAINS InterPro DOMAIN/s: DNA-binding, integrase-type (InterPro:IPR016177), Pathogenesis-related transcriptional factor/ERF, DNA-bi…
	AT1G15010	1.35693	1.99278	2.35912	2.0873	0	AT1G15010	unknown protein; BEST Arabidopsis thaliana protein match is: unknown protein (TAIR:AT2G01300.1); Has 71 Blast hits to 71 proteins in 13 species: Archae - 0; Bacteria - 2; Metazoa - 0; Fungi - 0; Plants - 69; Viruses - 0; Other Eukaryotes - 0 (source: NCBI BLink).
	AT3G13310	0.810835	1.25501	1.28915	0.729939	0	AT3G13310	Chaperone DnaJ-domain superfamily protein; FUNCTIONS IN: unfolded protein binding, heat shock protein binding; INVOLVED IN: protein folding; EXPRESSED IN: 23 plant structures; EXPRESSED DURING: 13 growth stages; CONTAINS InterPro DOMAIN/s: Molecular chaperone, heat shock protein, Hsp40, DnaJ (InterPro:IPR015609), Heat shock protein DnaJ, N-terminal (InterPro:IPR001623), Heat shock protein DnaJ (I…
	AT5G19230	1.37236	1.78907	2.05325	1.43209	0	AT5G19230	Glycoprotein membrane precursor GPI-anchored; FUNCTIONS IN: molecular_function unknown; INVOLVED IN: biological_process unknown; LOCATED IN: anchored to plasma membrane, plasma membrane, anchored to membrane; EXPRESSED IN: callus; BEST Arabidopsis thaliana protein match is: Glycoprotein membrane precursor GPI-anchored (TAIR:AT5G19240.1); Has 1807 Blast hits to 1807 proteins in 277 species: Archae…
	AT2G41430	0.674625	0.88869	1.13292	0.818065	0	ERD15	EARLY RESPONSIVE TO DEHYDRATION 15 (ERD15); BEST Arabidopsis thaliana protein match is: unknown protein (TAIR:AT4G14270.2); Has 169 Blast hits to 169 proteins in 23 species: Archae - 0; Bacteria - 0; Metazoa - 0; Fungi - 0; Plants - 169; Viruses - 0; Other Eukaryotes - 0 (source: NCBI BLink).
	AT4G01250	0.786427	1.52756	1.47953	1.3507	0	WRKY22	WRKY22; CONTAINS InterPro DOMAIN/s: DNA-binding WRKY (InterPro:IPR003657); BEST Arabidopsis thaliana protein match is: WRKY family transcription factor (TAIR:AT4G23550.1); Has 3274 Blast hits to 2836 proteins in 187 species: Archae - 0; Bacteria - 0; Metazoa - 0; Fungi - 3; Plants - 3256; Viruses - 0; Other Eukaryotes - 15 (source: NCBI BLink).
e	AT2G41090	-1.01028	-0.698447	0	-0.657323	-0.849569	AT2G41090	Calcium-binding EF-hand family protein; FUNCTIONS IN: calcium ion binding; LOCATED IN: cellular_component unknown; EXPRESSED IN: 21 plant structures; EXPRESSED DURING: 14 growth stages; CONTAINS InterPro DOMAIN/s: EF-Hand 1, calcium-binding site (InterPro:IPR018247), EF-HAND 2 (InterPro:IPR018249), EF-hand-like domain (InterPro:IPR011992), Calcium-binding EF-hand (InterPro:IPR002048), EF-hand (In…
	AT5G19240	-2.04906	0	-1.04039	-1.71344	-1.56814	AT5G19240	Glycoprotein membrane precursor GPI-anchored; FUNCTIONS IN: molecular_function unknown; INVOLVED IN: biological_process unknown; LOCATED IN: endomembrane system; EXPRESSED IN: 24 plant structures; EXPRESSED DURING: 14 growth stages; BEST Arabidopsis thaliana protein match is: Glycoprotein membrane precursor GPI-anchored (TAIR:AT5G19230.1); Has 1807 Blast hits to 1807 proteins in 277 species: Arch…
	AT1G78070	-1.09982	-0.772799	-1.32238	-1.74051	-1.18961	AT1G78070	Transducin/WD40 repeat-like superfamily protein; CONTAINS InterPro DOMAIN/s: WD40 repeat 2 (InterPro:IPR019782), WD40 repeat-like-containing domain (InterPro:IPR011046), WD40 repeat, conserved site (InterPro:IPR019775), WD40-repeat-containing domain (InterPro:IPR017986), WD40/YVTN repeat-like-containing domain (InterPro:IPR015943), WD40 repeat (InterPro:IPR001680), WD40 repeat, subgroup (InterPro…
	AT1G67360	-1.64593	-1.32453	-1.64585	-1.98064	-1.58111	AT1G67360	Rubber elongation factor protein (REF); INVOLVED IN: biological_process unknown; LOCATED IN: vacuole; EXPRESSED IN: 24 plant structures; EXPRESSED DURING: 15 growth stages; CONTAINS InterPro DOMAIN/s: Rubber elongation factor (InterPro:IPR008802); BEST Arabidopsis thaliana protein match is: Rubber elongation factor protein (REF) (TAIR:AT2G47780.1); Has 125 Blast hits to 125 proteins in 21 species…
	AT4G11660	-1.41756	-1.68886	-1.57451	-1.37975	-1.22537	AT-HSFB2B	AT-HSFB2B; FUNCTIONS IN: transcription repressor activity, sequence-specific DNA binding transcription factor activity; INVOLVED IN: response to chitin; LOCATED IN: nucleus; EXPRESSED IN: 24 plant structures; EXPRESSED DURING: 14 growth stages; CONTAINS InterPro DOMAIN/s: Winged helix-turn-helix transcription repressor DNA-binding (InterPro:IPR011991), Heat shock factor (HSF)-type, DNA-binding (I…
	AT3G22550	-1.00755	-1.09315	-0.965207	-0.970873	-0.859744	AT3G22550	Protein of unknown function (DUF581); CONTAINS InterPro DOMAIN/s: Protein of unknown function DUF581 (InterPro:IPR007650); BEST Arabidopsis thaliana protein match is: Protein of unknown function (DUF581) (TAIR:AT3G63210.1); Has 558 Blast hits to 549 proteins in 19 species: Archae - 0; Bacteria - 0; Metazoa - 0; Fungi - 0; Plants - 558; Viruses - 0; Other Eukaryotes - 0 (source: NCBI BLink).
	AT5G54470	-2.51079	-2.09653	-2.30993	-1.83463	-1.92978	BBX29	B-box type zinc finger family protein; FUNCTIONS IN: sequence-specific DNA binding transcription factor activity, zinc ion binding; INVOLVED IN: response to cold, regulation of transcription; LOCATED IN: intracellular; EXPRESSED IN: 11 plant structures; EXPRESSED DURING: 4 anthesis, F mature embryo stage, petal differentiation and expansion stage, E expanded cotyledon stage, D bilateral stage; CO…
	AT1G54050	-1.56263	-1.56044	-1.21066	-2.04272	-1.68799	AT1G54050	HSP20-like chaperones superfamily protein; CONTAINS InterPro DOMAIN/s: Heat shock protein Hsp20 (InterPro:IPR002068), HSP20-like chaperone (InterPro:IPR008978); BEST Arabidopsis thaliana protein match is: heat shock protein 17.6A (TAIR:AT5G12030.1); Has 4491 Blast hits to 4491 proteins in 1181 species: Archae - 166; Bacteria - 2520; Metazoa - 2; Fungi - 140; Plants - 1242; Viruses - 0; Other Euka…
f	AT5G35735	-0.554132	0	0.416125	0	0	AT5G35735	Auxin-responsive family protein; LOCATED IN: plasma membrane, membrane; EXPRESSED IN: 21 plant structures; EXPRESSED DURING: 12 growth stages; CONTAINS InterPro DOMAIN/s: Cytochrome b561, eukaryote (InterPro:IPR004877), Uncharacterised conserved protein UCP037471 (InterPro:IPR017214), Protein of unknown function DUF568, DOMON-like (InterPro:IPR007613), DOMON related (InterPro:IPR005018), Cytochro…
	AT1G72940	-0.553007	0	0	0	0	AT1G72940	Toll-Interleukin-Resistance (TIR) domain-containing protein; FUNCTIONS IN: transmembrane receptor activity, ATP binding; INVOLVED IN: signal transduction, defense response, apoptosis, innate immune response; LOCATED IN: intrinsic to membrane; EXPRESSED IN: 22 plant structures; EXPRESSED DURING: 13 growth stages; CONTAINS InterPro DOMAIN/s: NB-ARC (InterPro:IPR002182), Toll-Interleukin receptor (I…
	AT2G47730	-0.584074	0	0	0	0	GSTF8	glutathione S-transferase phi 8 (GSTF8); FUNCTIONS IN: glutathione transferase activity, glutathione binding; INVOLVED IN: in 8 processes; LOCATED IN: in 7 components; EXPRESSED IN: 25 plant structures; EXPRESSED DURING: 16 growth stages; CONTAINS InterPro DOMAIN/s: Thioredoxin fold (InterPro:IPR012335), Glutathione S-transferase, C-terminal (InterPro:IPR004046), Glutathione S-transferase, C-term…
	AT2G36800	-0.53807	0	0	0	0	DOGT1	don-glucosyltransferase 1 (DOGT1); CONTAINS InterPro DOMAIN/s: UDP-glucuronosyl/UDP-glucosyltransferase (InterPro:IPR002213); BEST Arabidopsis thaliana protein match is: UDP-glucosyl transferase 73C6 (TAIR:AT2G36790.1); Has 7663 Blast hits to 7564 proteins in 401 species: Archae - 0; Bacteria - 196; Metazoa - 2172; Fungi - 32; Plants - 5134; Viruses - 64; Other Eukaryotes - 65 (source: NCBI BLink…
	AT5G06320	-0.714283	0	0	0	0	NHL3	NDR1/HIN1-like 3 (NHL3); FUNCTIONS IN: molecular_function unknown; INVOLVED IN: defense response to virus, defense response to bacterium, response to bacterium; LOCATED IN: plasma membrane; EXPRESSED IN: 28 plant structures; EXPRESSED DURING: 13 growth stages; CONTAINS InterPro DOMAIN/s: Late embryogenesis abundant protein, group 2 (InterPro:IPR004864); BEST Arabidopsis thaliana protein match is:…
	AT5G58120	-0.787403	0	0	0	0	AT5G58120	Disease resistance protein (TIR-NBS-LRR class) family; FUNCTIONS IN: transmembrane receptor activity, nucleoside-triphosphatase activity, nucleotide binding, ATP binding; INVOLVED IN: signal transduction, apoptosis, defense response, innate immune response; LOCATED IN: intrinsic to membrane; EXPRESSED IN: 16 plant structures; EXPRESSED DURING: 9 growth stages; CONTAINS InterPro DOMAIN/s: ATPase, …
	AT1G66090	-0.816639	0	0	0	0	AT1G66090	Disease resistance protein (TIR-NBS class); FUNCTIONS IN: transmembrane receptor activity, nucleoside-triphosphatase activity, nucleotide binding, ATP binding; INVOLVED IN: signal transduction, defense response, apoptosis, innate immune response; LOCATED IN: intrinsic to membrane, chloroplast; EXPRESSED IN: 22 plant structures; EXPRESSED DURING: 10 growth stages; CONTAINS InterPro DOMAIN/s: ATPas…
	AT4G24570	-1.10425	0	0	0	0	DIC2	dicarboxylate carrier 2 (DIC2); FUNCTIONS IN: binding, dicarboxylic acid transmembrane transporter activity; INVOLVED IN: transport, mitochondrial transport; LOCATED IN: mitochondrial inner membrane, membrane; EXPRESSED IN: 24 plant structures; EXPRESSED DURING: 14 growth stages; CONTAINS InterPro DOMAIN/s: Mitochondrial carrier protein (InterPro:IPR002067), Mitochondrial substrate carrier (Inter…
	AT5G03380	-0.50344	0	0	0	0	AT5G03380	Heavy metal transport/detoxification superfamily protein ; FUNCTIONS IN: metal ion binding; INVOLVED IN: metal ion transport; EXPRESSED IN: 24 plant structures; EXPRESSED DURING: 13 growth stages; CONTAINS InterPro DOMAIN/s: Heavy metal transport/detoxification protein (InterPro:IPR006121); BEST Arabidopsis thaliana protein match is: Heavy metal transport/detoxification superfamily protein (TAIR:…
	AT2G33590	-0.635975	0	0	0	0	CRL1	NAD(P)-binding Rossmann-fold superfamily protein; FUNCTIONS IN: coenzyme binding, binding, cinnamoyl-CoA reductase activity, catalytic activity; INVOLVED IN: response to cadmium ion, lignin biosynthetic process; LOCATED IN: cellular_component unknown; EXPRESSED IN: 23 plant structures; EXPRESSED DURING: 13 growth stages; CONTAINS InterPro DOMAIN/s: NAD-dependent epimerase/dehydratase (InterPro:IP…
	AT3G23170	-0.966124	0	0	0	0	AT3G23170	unknown protein; BEST Arabidopsis thaliana protein match is: unknown protein (TAIR:AT4G14450.1); Has 74 Blast hits to 74 proteins in 6 species: Archae - 0; Bacteria - 0; Metazoa - 0; Fungi - 0; Plants - 74; Viruses - 0; Other Eukaryotes - 0 (source: NCBI BLink).
	AT5G54960	-0.411601	0	0	0	0	PDC2	pyruvate decarboxylase-2 (PDC2); FUNCTIONS IN: pyruvate decarboxylase activity, magnesium ion binding, carboxy-lyase activity, thiamin pyrophosphate binding, catalytic activity; INVOLVED IN: response to hypoxia; LOCATED IN: cellular_component unknown; EXPRESSED IN: 24 plant structures; EXPRESSED DURING: 13 growth stages; CONTAINS InterPro DOMAIN/s: Thiamine pyrophosphate enzyme, central domain (I…
	AT4G24160	-0.705396	0	0	0	0	AT4G24160	alpha/beta-Hydrolases superfamily protein; CONTAINS InterPro DOMAIN/s: Alpha/beta hydrolase fold-1 (InterPro:IPR000073); BEST Arabidopsis thaliana protein match is: alpha/beta-Hydrolases superfamily protein (TAIR:AT1G64670.1); Has 13697 Blast hits to 13658 proteins in 1951 species: Archae - 114; Bacteria - 10198; Metazoa - 427; Fungi - 417; Plants - 428; Viruses - 0; Other Eukaryotes - 2113 (sour…
	AT4G34150	-0.740794	0	0	0	0	AT4G34150	Calcium-dependent lipid-binding (CaLB domain) family protein; CONTAINS InterPro DOMAIN/s: C2 membrane targeting protein (InterPro:IPR018029), C2 calcium/lipid-binding domain, CaLB (InterPro:IPR008973), C2 calcium-dependent membrane targeting (InterPro:IPR000008); BEST Arabidopsis thaliana protein match is: soybean gene regulated by cold-2 (TAIR:AT1G09070.1); Has 30201 Blast hits to 17322 proteins…
	AT5G04340	-0.752969	0	0	0	0	ZAT6	zinc finger of Arabidopsis thaliana 6 (ZAT6); FUNCTIONS IN: sequence-specific DNA binding transcription factor activity, zinc ion binding, nucleic acid binding; LOCATED IN: intracellular; EXPRESSED IN: 15 plant structures; EXPRESSED DURING: 8 growth stages; CONTAINS InterPro DOMAIN/s: Zinc finger, C2H2-like (InterPro:IPR015880), Zinc finger, C2H2-type (InterPro:IPR007087); BEST Arabidopsis thalia…
	AT1G61340	-0.804026	0	0	0	0	FBS1	F-box family protein; CONTAINS InterPro DOMAIN/s: F-box domain, cyclin-like (InterPro:IPR001810); BEST Arabidopsis thaliana protein match is: F-box family protein (TAIR:AT4G05010.1); Has 91 Blast hits to 91 proteins in 14 species: Archae - 0; Bacteria - 0; Metazoa - 0; Fungi - 0; Plants - 91; Viruses - 0; Other Eukaryotes - 0 (source: NCBI BLink).
	AT4G19520	-0.76173	0	0	0	0	AT4G19520	disease resistance protein (TIR-NBS-LRR class) family; FUNCTIONS IN: transmembrane receptor activity, ATP binding; INVOLVED IN: signal transduction, apoptosis, defense response, innate immune response; LOCATED IN: intrinsic to membrane; CONTAINS InterPro DOMAIN/s: NB-ARC (InterPro:IPR002182), Leucine-rich repeat (InterPro:IPR001611), Disease resistance protein (InterPro:IPR000767), Toll-Interleuk…
	AT1G27730	-1.02375	0	0	0	0	STZ	salt tolerance zinc finger (STZ); CONTAINS InterPro DOMAIN/s: Zinc finger, C2H2-like (InterPro:IPR015880), Zinc finger, C2H2-type (InterPro:IPR007087); BEST Arabidopsis thaliana protein match is: zinc finger of Arabidopsis thaliana 6 (TAIR:AT5G04340.1); Has 5350 Blast hits to 3982 proteins in 146 species: Archae - 0; Bacteria - 0; Metazoa - 4198; Fungi - 48; Plants - 937; Viruses - 0; Other Eukar…
	AT2G46400	-1.14013	0	0	0	0	WRKY46	WRKY DNA-binding protein 46 (WRKY46); CONTAINS InterPro DOMAIN/s: DNA-binding WRKY (InterPro:IPR003657); BEST Arabidopsis thaliana protein match is: WRKY family transcription factor (TAIR:AT4G23810.1); Has 3385 Blast hits to 2951 proteins in 185 species: Archae - 0; Bacteria - 0; Metazoa - 0; Fungi - 0; Plants - 3370; Viruses - 0; Other Eukaryotes - 15 (source: NCBI BLink).
	AT5G47910	-0.477507	0	0	0	0	RBOHD	respiratory burst oxidase homologue D (RBOHD); FUNCTIONS IN: NAD(P)H oxidase activity; INVOLVED IN: oxygen and reactive oxygen species metabolic process, defense response to fungus, response to heat, defense response, negative regulation of programmed cell death; LOCATED IN: plasma membrane; EXPRESSED IN: 24 plant structures; EXPRESSED DURING: 13 growth stages; CONTAINS InterPro DOMAIN/s: Ferredo…
	AT5G42380	-1.53749	0	0	0	0	CML37	calmodulin like 37 (CML37); FUNCTIONS IN: calcium ion binding; INVOLVED IN: response to ozone; LOCATED IN: chloroplast; EXPRESSED IN: 12 plant structures; EXPRESSED DURING: 8 growth stages; CONTAINS InterPro DOMAIN/s: EF-Hand 1, calcium-binding site (InterPro:IPR018247), EF-HAND 2 (InterPro:IPR018249), EF-hand-like domain (InterPro:IPR011992), Calcium-binding EF-hand (InterPro:IPR002048), EF-hand…
	AT1G13260	-0.552803	0	0	0	0	RAV1	related to ABI3/VP1 1 (RAV1); CONTAINS InterPro DOMAIN/s: DNA-binding, integrase-type (InterPro:IPR016177), Transcriptional factor B3 (InterPro:IPR003340), Pathogenesis-related transcriptional factor/ERF, DNA-binding (InterPro:IPR001471); BEST Arabidopsis thaliana protein match is: ethylene response DNA binding factor 3 (TAIR:AT3G25730.1); Has 6277 Blast hits to 6015 proteins in 258 species: Arch…
	AT5G58070	-0.828341	0	0	0	0	TIL	temperature-induced lipocalin (TIL); FUNCTIONS IN: binding, transporter activity; INVOLVED IN: transport, response to cold, response to light stimulus, response to heat; LOCATED IN: mitochondrion, endoplasmic reticulum, plasma membrane, vacuole; EXPRESSED IN: 26 plant structures; EXPRESSED DURING: 17 growth stages; CONTAINS InterPro DOMAIN/s: Lipocalin, bacterial (InterPro:IPR002446), Lipocalin, …
	AT1G72910	-2.0233	0	0	0	0	AT1G72910	Toll-Interleukin-Resistance (TIR) domain-containing protein; FUNCTIONS IN: transmembrane receptor activity, ATP binding; INVOLVED IN: signal transduction, defense response, apoptosis, innate immune response; LOCATED IN: intrinsic to membrane; CONTAINS InterPro DOMAIN/s: NB-ARC (InterPro:IPR002182), Toll-Interleukin receptor (InterPro:IPR000157); BEST Arabidopsis thaliana protein match is: Toll-In…
	AT1G72920	-1.71133	0	0	0	0	AT1G72920	Toll-Interleukin-Resistance (TIR) domain family protein; FUNCTIONS IN: transmembrane receptor activity; INVOLVED IN: response to wounding, defense response; LOCATED IN: intrinsic to membrane; EXPRESSED IN: 19 plant structures; EXPRESSED DURING: 10 growth stages; CONTAINS InterPro DOMAIN/s: Toll-Interleukin receptor (InterPro:IPR000157); BEST Arabidopsis thaliana protein match is: Toll-Interleukin…
	AT3G56400	-1.38728	0	0	0	0	WRKY70	WRKY DNA-binding protein 70 (WRKY70); CONTAINS InterPro DOMAIN/s: DNA-binding WRKY (InterPro:IPR003657); BEST Arabidopsis thaliana protein match is: WRKY DNA-binding protein 54 (TAIR:AT2G40750.1); Has 3203 Blast hits to 2772 proteins in 182 species: Archae - 0; Bacteria - 0; Metazoa - 0; Fungi - 0; Plants - 3190; Viruses - 0; Other Eukaryotes - 13 (source: NCBI BLink).
g	AT4G17230	0	0.713623	0.70944	0	0	SCL13	SCARECROW-like 13 (SCL13); CONTAINS InterPro DOMAIN/s: Transcription factor GRAS (InterPro:IPR005202); BEST Arabidopsis thaliana protein match is: scarecrow-like 5 (TAIR:AT1G50600.1); Has 2512 Blast hits to 2467 proteins in 302 species: Archae - 0; Bacteria - 4; Metazoa - 0; Fungi - 0; Plants - 2508; Viruses - 0; Other Eukaryotes - 0 (source: NCBI BLink).
	AT1G32928	0	1.50132	1.3877	0	0	AT1G32928	unknown protein; BEST Arabidopsis thaliana protein match is: unknown protein (TAIR:AT1G32920.1); Has 35333 Blast hits to 34131 proteins in 2444 species: Archae - 798; Bacteria - 22429; Metazoa - 974; Fungi - 991; Plants - 531; Viruses - 0; Other Eukaryotes - 9610 (source: NCBI BLink).
	AT5G63790	0	0.780936	0.738239	0	0	NAC102	NAC domain containing protein 102 (NAC102); CONTAINS InterPro DOMAIN/s: No apical meristem (NAM) protein (InterPro:IPR003441); BEST Arabidopsis thaliana protein match is: NAC (No Apical Meristem) domain transcriptional regulator superfamily protein (TAIR:AT5G08790.1); Has 3012 Blast hits to 3006 proteins in 75 species: Archae - 0; Bacteria - 0; Metazoa - 0; Fungi - 0; Plants - 3012; Viruses - 0; …
	AT1G14540	0	2.64722	2.51404	0	0	PER4	Peroxidase superfamily protein; FUNCTIONS IN: peroxidase activity, heme binding; INVOLVED IN: response to oxidative stress, oxidation reduction; LOCATED IN: endomembrane system; EXPRESSED IN: leaf apex, sepal, root, stamen; EXPRESSED DURING: 4 anthesis; CONTAINS InterPro DOMAIN/s: Haem peroxidase (InterPro:IPR010255), Plant peroxidase (InterPro:IPR000823), Peroxidases heam-ligand binding site (In…
	AT3G52800	0	0.705728	0.662341	0	0	AT3G52800	A20/AN1-like zinc finger family protein; FUNCTIONS IN: DNA binding, zinc ion binding; INVOLVED IN: response to chitin; LOCATED IN: cellular_component unknown; EXPRESSED IN: 23 plant structures; EXPRESSED DURING: 15 growth stages; CONTAINS InterPro DOMAIN/s: Zinc finger, AN1-type (InterPro:IPR000058), Zinc finger, A20-type (InterPro:IPR002653); BEST Arabidopsis thaliana protein match is: A20/AN1-l…
	AT4G20860	0	0.980834	0.768458	0	0	AT4G20860	FAD-binding Berberine family protein; FUNCTIONS IN: electron carrier activity, oxidoreductase activity, FAD binding, catalytic activity; INVOLVED IN: response to cyclopentenone; LOCATED IN: endomembrane system; EXPRESSED IN: 10 plant structures; EXPRESSED DURING: LP.06 six leaves visible, LP.04 four leaves visible, 4 anthesis, LP.10 ten leaves visible, LP.08 eight leaves visible; CONTAINS InterPr…
	AT3G05120	0	0.500547	0.556529	0	0	GID1A	GA INSENSITIVE DWARF1A (GID1A); FUNCTIONS IN: hydrolase activity; INVOLVED IN: floral organ morphogenesis, raffinose family oligosaccharide biosynthetic process, positive regulation of gibberellic acid mediated signaling pathway, response to gibberellin stimulus, gibberellin mediated signaling pathway; LOCATED IN: nucleus, cytoplasm; EXPRESSED IN: 27 plant structures; EXPRESSED DURING: 15 growth …
	AT1G17290	0	0.628335	0.662806	0	0	AlaAT1	alanine aminotransferas (AlaAT1); FUNCTIONS IN: L-alanine:2-oxoglutarate aminotransferase activity, ATP binding; INVOLVED IN: response to cadmium ion, response to hypoxia, L-alanine catabolic process, by transamination; LOCATED IN: mitochondrion, chloroplast; EXPRESSED IN: 9 plant structures; EXPRESSED DURING: L mature pollen stage, M germinated pollen stage; CONTAINS InterPro DOMAIN/s: 1-aminocy…
	AT1G73500	0	0.783004	0.838102	0	0	MKK9	MAP kinase kinase 9 (MKK9); FUNCTIONS IN: protein kinase activator activity, MAP kinase kinase activity, kinase activity; INVOLVED IN: in 7 processes; LOCATED IN: mitochondrion; EXPRESSED IN: 21 plant structures; EXPRESSED DURING: 13 growth stages; CONTAINS InterPro DOMAIN/s: Protein kinase, ATP binding site (InterPro:IPR017441), Protein kinase, catalytic domain (InterPro:IPR000719), Serine/threo…
	AT2G41100	0	1.37416	1.46527	0	0	TCH3	TOUCH 3 (TCH3); FUNCTIONS IN: calcium ion binding; INVOLVED IN: response to mechanical stimulus, response to temperature stimulus, thigmotropism, response to absence of light; LOCATED IN: plasma membrane; EXPRESSED IN: 26 plant structures; EXPRESSED DURING: 14 growth stages; CONTAINS InterPro DOMAIN/s: EF-Hand 1, calcium-binding site (InterPro:IPR018247), EF-HAND 2 (InterPro:IPR018249), Calcium-b…
	AT1G68620	0	1.03173	1.22331	0	0	AT1G68620	alpha/beta-Hydrolases superfamily protein; FUNCTIONS IN: hydrolase activity; INVOLVED IN: metabolic process; LOCATED IN: cellular_component unknown; EXPRESSED IN: 11 plant structures; EXPRESSED DURING: LP.06 six leaves visible, LP.04 four leaves visible, 4 anthesis, C globular stage, petal differentiation and expansion stage; CONTAINS InterPro DOMAIN/s: Lipase, GDXG, active site (InterPro:IPR0021…
	AT1G72900	0	0.883347	1.0335	0	0	AT1G72900	Toll-Interleukin-Resistance (TIR) domain-containing protein; FUNCTIONS IN: transmembrane receptor activity, ATP binding; INVOLVED IN: signal transduction, defense response, apoptosis, innate immune response; LOCATED IN: intrinsic to membrane; EXPRESSED IN: 20 plant structures; EXPRESSED DURING: 10 growth stages; CONTAINS InterPro DOMAIN/s: NB-ARC (InterPro:IPR002182), Toll-Interleukin receptor (I…
	AT3G08720	0	0.83279	1.0537	0	0	S6K2	serine/threonine protein kinase 2 (S6K2); CONTAINS InterPro DOMAIN/s: Protein kinase, ATP binding site (InterPro:IPR017441), Serine/threonine-protein kinase domain (InterPro:IPR002290), Serine/threonine-protein kinase-like domain (InterPro:IPR017442), AGC-kinase, C-terminal (InterPro:IPR000961), Protein kinase, C-terminal (InterPro:IPR017892), Serine/threonine-protein kinase, active site (InterPr…
	AT5G57560	0	0.761636	0.931645	0	0	TCH4	Touch 4 (TCH4); CONTAINS InterPro DOMAIN/s: Xyloglucan endotransglucosylase/hydrolase (InterPro:IPR016455), Xyloglucan endo-transglycosylase, C-terminal (InterPro:IPR010713), Concanavalin A-like lectin/glucanase, subgroup (InterPro:IPR013320), Concanavalin A-like lectin/glucanase (InterPro:IPR008985), Glycoside hydrolase, family 16 (InterPro:IPR000757), Glycoside hydrolase, family 16, active site…
	AT2G40000	0	0.77457	1.16558	0	0	HSPRO2	ortholog of sugar beet HS1 PRO-1 2 (HSPRO2); CONTAINS InterPro DOMAIN/s: Hs1pro-1, C-terminal (InterPro:IPR009743), Hs1pro-1, N-terminal (InterPro:IPR009869); BEST Arabidopsis thaliana protein match is: Hs1pro-1 protein (TAIR:AT3G55840.1); Has 71 Blast hits to 71 proteins in 18 species: Archae - 0; Bacteria - 0; Metazoa - 0; Fungi - 0; Plants - 60; Viruses - 0; Other Eukaryotes - 11 (source: NCBI…
	AT2G36220	0	0.469952	0.791781	0	0	AT2G36220	unknown protein; BEST Arabidopsis thaliana protein match is: unknown protein (TAIR:AT3G52710.1); Has 74 Blast hits to 74 proteins in 10 species: Archae - 0; Bacteria - 0; Metazoa - 0; Fungi - 0; Plants - 74; Viruses - 0; Other Eukaryotes - 0 (source: NCBI BLink).
	AT1G73010	0	1.69813	1.41957	0	1.17611	PS2	phosphate starvation-induced gene 2 (PS2); FUNCTIONS IN: phosphatase activity; INVOLVED IN: metabolic process; LOCATED IN: cellular_component unknown; EXPRESSED IN: 19 plant structures; EXPRESSED DURING: 10 growth stages; CONTAINS InterPro DOMAIN/s: Pyridoxal phosphate phosphatase, PHOSPHO2 (InterPro:IPR016965), HAD-superfamily hydrolase, subfamily IB, PSPase-like (InterPro:IPR006383), Pyridoxal …
	AT5G65207	0	2.22867	2.99877	0	1.44751	AT5G65207	unknown protein; BEST Arabidopsis thaliana protein match is: unknown protein (TAIR:AT5G10040.1); Has 30201 Blast hits to 17322 proteins in 780 species: Archae - 12; Bacteria - 1396; Metazoa - 17338; Fungi - 3422; Plants - 5037; Viruses - 0; Other Eukaryotes - 2996 (source: NCBI BLink).
h	AT5G66985	1.73355	0	0	0	0	AT5G66985	unknown protein; Has 30201 Blast hits to 17322 proteins in 780 species: Archae - 12; Bacteria - 1396; Metazoa - 17338; Fungi - 3422; Plants - 5037; Viruses - 0; Other Eukaryotes - 2996 (source: NCBI BLink).
	AT4G33560	1.06781	0	0	0	0	AT4G33560	Wound-responsive family protein; CONTAINS InterPro DOMAIN/s: Protein of unknown function wound-induced (InterPro:IPR022251); BEST Arabidopsis thaliana protein match is: wound-responsive protein-related (TAIR:AT2G14070.1); Has 146 Blast hits to 145 proteins in 15 species: Archae - 0; Bacteria - 0; Metazoa - 0; Fungi - 0; Plants - 146; Viruses - 0; Other Eukaryotes - 0 (source: NCBI BLink).
	AT3G43190	1.72622	1.59982	0	0	0	SUS4	sucrose synthase 4 (SUS4); FUNCTIONS IN: UDP-glycosyltransferase activity, sucrose synthase activity, transferase activity, transferring glycosyl groups; INVOLVED IN: sucrose biosynthetic process, response to hypoxia; LOCATED IN: plasma membrane, vacuole, membrane; EXPRESSED IN: 15 plant structures; EXPRESSED DURING: 6 growth stages; CONTAINS InterPro DOMAIN/s: Sucrose synthase, plant/cyanobacter…
	AT3G03270	1.03592	1.00785	0	0	0	AT3G03270	Adenine nucleotide alpha hydrolases-like superfamily protein; INVOLVED IN: response to stress; LOCATED IN: plasma membrane, membrane; EXPRESSED IN: 23 plant structures; EXPRESSED DURING: 13 growth stages; CONTAINS InterPro DOMAIN/s: UspA (InterPro:IPR006016), Rossmann-like alpha/beta/alpha sandwich fold (InterPro:IPR014729); BEST Arabidopsis thaliana protein match is: Adenine nucleotide alpha hyd…
	AT3G02555	0.672622	0.704385	0	0	0	AT3G02555	unknown protein; BEST Arabidopsis thaliana protein match is: unknown protein (TAIR:AT5G16110.1); Has 130 Blast hits to 130 proteins in 18 species: Archae - 0; Bacteria - 0; Metazoa - 0; Fungi - 0; Plants - 130; Viruses - 0; Other Eukaryotes - 0 (source: NCBI BLink).
j	AT5G54940	0	0	0.446995	0	0	AT5G54940	Translation initiation factor SUI1 family protein; FUNCTIONS IN: translation initiation factor activity; INVOLVED IN: translational initiation, translation; LOCATED IN: cellular_component unknown; EXPRESSED IN: 24 plant structures; EXPRESSED DURING: 15 growth stages; CONTAINS InterPro DOMAIN/s: Translation initiation factor SUI1 (InterPro:IPR001950), Eukaryotic translation initiation factor SUI1 …
	AT5G63130	0	0	1.03019	0	0	AT5G63130	Octicosapeptide/Phox/Bem1p family protein; CONTAINS InterPro DOMAIN/s: Octicosapeptide/Phox/Bem1p (InterPro:IPR000270); BEST Arabidopsis thaliana protein match is: Octicosapeptide/Phox/Bem1p family protein (TAIR:AT3G48240.1); Has 353 Blast hits to 353 proteins in 15 species: Archae - 0; Bacteria - 0; Metazoa - 0; Fungi - 0; Plants - 353; Viruses - 0; Other Eukaryotes - 0 (source: NCBI BLink).
	AT3G04640	0	0	1.24928	0	0	AT3G04640	glycine-rich protein; Has 42937 Blast hits to 13549 proteins in 1124 species: Archae - 42; Bacteria - 16604; Metazoa - 12821; Fungi - 2296; Plants - 5249; Viruses - 609; Other Eukaryotes - 5316 (source: NCBI BLink).
	AT2G13790	0	0	0.521133	0	0	SERK4	somatic embryogenesis receptor-like kinase 4 (SERK4); FUNCTIONS IN: protein kinase activity, transmembrane receptor protein serine/threonine kinase activity; INVOLVED IN: in 6 processes; LOCATED IN: endomembrane system; EXPRESSED IN: rosette leaf, cauline leaf, fruit, root, flower; CONTAINS InterPro DOMAIN/s: Protein kinase, ATP binding site (InterPro:IPR017441), Protein kinase, catalytic domain …
	AT4G22780	0	0	0.462837	0	0	ACR7	ACT domain repeat 7 (ACR7); FUNCTIONS IN: amino acid binding; INVOLVED IN: metabolic process; LOCATED IN: cytosol; EXPRESSED IN: 24 plant structures; EXPRESSED DURING: 15 growth stages; CONTAINS InterPro DOMAIN/s: Amino acid-binding ACT (InterPro:IPR002912); BEST Arabidopsis thaliana protein match is: ACT domain repeat 8 (TAIR:AT1G12420.1); Has 2549 Blast hits to 1855 proteins in 571 species: Arc…
	AT5G45340	0	0	0.876719	0	0	CYP707A3	cytochrome P450, family 707, subfamily A, polypeptide 3 (CYP707A3); FUNCTIONS IN: oxygen binding, (+)-abscisic acid 8'-hydroxylase activity; INVOLVED IN: in 8 processes; LOCATED IN: endomembrane system; EXPRESSED IN: 25 plant structures; EXPRESSED DURING: 12 growth stages; CONTAINS InterPro DOMAIN/s: Cytochrome P450 (InterPro:IPR001128), Cytochrome P450, E-class, group I (InterPro:IPR002401), Cyt…
	AT2G26660	0	0	0.662352	0	0	SPX2	SPX domain gene 2 (SPX2); CONTAINS InterPro DOMAIN/s: SPX, N-terminal (InterPro:IPR004331); BEST Arabidopsis thaliana protein match is: SPX domain gene 1 (TAIR:AT5G20150.1); Has 1206 Blast hits to 1202 proteins in 209 species: Archae - 0; Bacteria - 6; Metazoa - 245; Fungi - 512; Plants - 320; Viruses - 0; Other Eukaryotes - 123 (source: NCBI BLink).
	AT1G78850	0	0	0.565992	0	0	AT1G78850	D-mannose binding lectin protein with Apple-like carbohydrate-binding domain; FUNCTIONS IN: sugar binding; LOCATED IN: apoplast, cell wall, plasma membrane, plant-type cell wall; EXPRESSED IN: phloem, stem, guard cell, cultured cell, callus; CONTAINS InterPro DOMAIN/s: Curculin-like (mannose-binding) lectin (InterPro:IPR001480), Apple-like (InterPro:IPR003609); BEST Arabidopsis thaliana protein m…
	AT2G42670	0	0	0.871999	0	0	AT2G42670	Protein of unknown function (DUF1637); FUNCTIONS IN: cysteamine dioxygenase activity; INVOLVED IN: oxidation reduction; LOCATED IN: cellular_component unknown; EXPRESSED IN: 24 plant structures; EXPRESSED DURING: 15 growth stages; CONTAINS InterPro DOMAIN/s: Protein of unknown function DUF1637 (InterPro:IPR012864); BEST Arabidopsis thaliana protein match is: Protein of unknown function (DUF1637) …
	AT5G24590	0	0	0.449922	0	0	TIP	TCV-interacting protein (TIP); CONTAINS InterPro DOMAIN/s: No apical meristem (NAM) protein (InterPro:IPR003441); BEST Arabidopsis thaliana protein match is: NAC domain containing protein 62 (TAIR:AT3G49530.1); Has 2952 Blast hits to 2945 proteins in 75 species: Archae - 0; Bacteria - 0; Metazoa - 0; Fungi - 0; Plants - 2952; Viruses - 0; Other Eukaryotes - 0 (source: NCBI BLink).
	AT1G64280	0	0	0.500064	0	0	NPR1	NONEXPRESSER OF PR GENES 1 (NPR1); CONTAINS InterPro DOMAIN/s: BTB/POZ (InterPro:IPR013069), NPR1/NIM1 like, C-terminal (InterPro:IPR021094), BTB/POZ fold (InterPro:IPR011333), Ankyrin repeat-containing domain (InterPro:IPR020683), BTB/POZ-like (InterPro:IPR000210), Ankyrin repeat (InterPro:IPR002110); BEST Arabidopsis thaliana protein match is: Ankyrin repeat family protein / BTB/POZ domain-cont…
	AT5G13190	0	0	0.392402	0	0	GILP	CONTAINS InterPro DOMAIN/s: LPS-induced tumor necrosis factor alpha factor (InterPro:IPR006629); Has 30201 Blast hits to 17322 proteins in 780 species: Archae - 12; Bacteria - 1396; Metazoa - 17338; Fungi - 3422; Plants - 5037; Viruses - 0; Other Eukaryotes - 2996 (source: NCBI BLink).
	AT1G19020	0	0	1.23804	0	0	AT1G19020	unknown protein; BEST Arabidopsis thaliana protein match is: unknown protein (TAIR:AT3G48180.1); Has 88 Blast hits to 88 proteins in 15 species: Archae - 0; Bacteria - 0; Metazoa - 0; Fungi - 0; Plants - 88; Viruses - 0; Other Eukaryotes - 0 (source: NCBI BLink).
	AT2G22500	0	0	0.39847	0	0	UCP5	uncoupling protein 5 (UCP5); FUNCTIONS IN: binding, dicarboxylic acid transmembrane transporter activity; INVOLVED IN: transport, mitochondrial transport; LOCATED IN: mitochondrion, mitochondrial inner membrane, membrane; EXPRESSED IN: 23 plant structures; EXPRESSED DURING: 15 growth stages; CONTAINS InterPro DOMAIN/s: Mitochondrial substrate carrier (InterPro:IPR001993), Mitochondrial brown fat …
	AT1G09070	0	0	0.581027	0	0	SRC2	soybean gene regulated by cold-2 (SRC2); CONTAINS InterPro DOMAIN/s: C2 calcium/lipid-binding domain, CaLB (InterPro:IPR008973), C2 calcium-dependent membrane targeting (InterPro:IPR000008); BEST Arabidopsis thaliana protein match is: Calcium-dependent lipid-binding (CaLB domain) family protein (TAIR:AT3G16510.1); Has 25146 Blast hits to 15856 proteins in 1076 species: Archae - 6; Bacteria - 3010…
	AT5G27420	0	0	1.79413	0	0	CNI1	carbon/nitrogen insensitive 1 (CNI1); CONTAINS InterPro DOMAIN/s: Zinc finger, RING-type (InterPro:IPR001841), Zinc finger, C3HC4 RING-type (InterPro:IPR018957); BEST Arabidopsis thaliana protein match is: RING/U-box superfamily protein (TAIR:AT3G05200.1); Has 1807 Blast hits to 1807 proteins in 277 species: Archae - 0; Bacteria - 0; Metazoa - 736; Fungi - 347; Plants - 385; Viruses - 0; Other Eu…
	AT5G20790	0	0	1.40869	0	0	AT5G20790	unknown protein; FUNCTIONS IN: molecular_function unknown; INVOLVED IN: biological_process unknown; LOCATED IN: endomembrane system; EXPRESSED IN: 11 plant structures; EXPRESSED DURING: LP.04 four leaves visible, 4 anthesis, petal differentiation and expansion stage; BEST Arabidopsis thaliana protein match is: unknown protein (TAIR:AT3G43110.1); Has 30201 Blast hits to 17322 proteins in 780 speci…

## Sheet: Cluster-a
GO- and Transcription Factor- Enrichment analyses of Cluster a genes
Root					Log2FC					TF target
Gene ID	Symbol	Description			Col	adc1	OXCuAO3	cdr7/cuao3	OXPtADC	N.S.
AT1G10140	AT1G10140	Uncharacterized conserved protein UCP031279 [Source:NCBI gene (formerly Entrezgene);Acc:837551]			0.517696	0.799042	0.954927	0.470485	0.920556
AT1G33055	AT1G33055				1.67206	2.63628	2.27715	1.86619	2.28419
AT2G15890	MEE14	maternal effect embryo arrest 14 [Source:NCBI gene (formerly Entrezgene);Acc:816085]			1.11793	1.76132	1.9061	1.09687	1.16799
AT3G06435	AT3G06435	Expressed protein [Source:NCBI gene (formerly Entrezgene);Acc:28718918]			0.828527	1.07931	0.978074	0	0.833792
AT3G23150	ETR2	Signal transduction histidine kinase, hybrid-type, ethylene sensor [Source:NCBI gene (formerly Entrezgene);Acc:821891]			0.625625	0.911857	0.60535	0	1.19289
AT3G49780	PSK4	phytosulfokine 4 [Source:NCBI gene (formerly Entrezgene);Acc:824140]			0.631446	0.981872	0.799516	0	0.96521
AT4G27450	AT4G27450	aluminum induced protein with YGL and LRDR motifs [Source:NCBI gene (formerly Entrezgene);Acc:828854]			1.42851	1.61431	1.49679	1.84388	1.42833
AT4G32480	AT4G32480	sugar phosphate exchanger, putative (DUF506) [Source:NCBI gene (formerly Entrezgene);Acc:829383]			1.89349	2.20656	2.5272	1.91341	1.67828
AT4G38470	STY46	ACT-like protein tyrosine kinase family protein [Source:NCBI gene (formerly Entrezgene);Acc:830003]			0.566397	0.835118	0.980994	0.895212	0.883277
AT5G19120	AT5G19120	Eukaryotic aspartyl protease family protein [Source:NCBI gene (formerly Entrezgene);Acc:832032]			1.3096	1.59122	1.58332	1.27642	1.3405
GO enrichment analysis
GO-BP
Enrichment FDR	nGenes	Biological Process (BP)	Pathway Genes	Fold Enrichment
0.0252758	1	GO:0009061 anaerobic respiration	9	306.978
0.0461701	1	GO:0010105 negative reg. of ethylene-activated signaling pathway	19	145.411
0.0461701	1	GO:0070298 negative reg. of phosphorelay signal transduction system	19	145.411
7.4256e-20	10	GO:0071456 cellular response to hypoxia	240	115.117
7.4256e-20	10	GO:0036294 cellular response to decreased oxygen levels	242	114.165
1.22003e-19	10	GO:0001666 response to hypoxia	267	103.476
1.22003e-19	10	GO:0070482 response to oxygen levels	272	101.574
5.96904e-13	10	GO:0033554 cellular response to stress	1272	21.7201
1.6161e-11	10	GO:0070887 cellular response to chemical stimulus	1791	15.426
9.83716e-11	10	GO:0009628 response to abiotic stimulus	2170	12.7318
3.06334e-09	10	GO:0042221 response to chemical	3091	8.93821
2.99691e-08	10	GO:0006950 response to stress	3953	6.98912
GO-MF
Enrichment FDR	nGenes	Molecular Function (MF)	Pathway Genes	Fold Enrichment
0.0265258	1	GO:0038199 ethylene receptor activity	5	552.56
0.0265258	1	GO:0051740 ethylene binding	5	552.56
0.0265258	1	GO:0072328 alkene binding	5	552.56
0.0450059	1	GO:0000155 phosphorelay sensor kinase activity	16	172.675
0.0450059	1	GO:0004673 protein histidine kinase activity	17	162.518
0.0450059	1	GO:0016775 phosphotransferase activity nitrogenous group as acceptor	17	162.518
0.0498819	1	GO:0008083 growth factor activity	22	125.582
GO-CC
Enrichment FDR	nGenes	Cellular Component (CC)	Pathway Genes	Fold Enrichment
NS
Transcription factor enrichment analysis
TF-AGRIS
Enrichment FDR	nGenes	Transcription Factor Binding Motif	Pathway Genes	Fold Enrichment
NS
Shoot					Log2FC					TF target
Gene ID	Symbol	Description			Col	adc1	OXCuAO3	cdr7/cuao3	OXPtADC	ATBHLH15	BZIP16	GBF5	ABF2	SEPALLATA3	ABI5	AREB3
AT1G43800	FTM1	Plant stearoyl-acyl-carrier-protein desaturase family protein [Source:NCBI gene (formerly Entrezgene);Acc:840977]			2.85812	1.90005	1.13501	3.1464	2.27507						x		a' sub
AT1G77120	ADH1	alcohol dehydrogenase 1 [Source:NCBI gene (formerly Entrezgene);Acc:844047]			2.11262	1.52109	1.09798	0	1.65078		x	x	x		x	x
AT1G30720	AT1G30720	FAD-binding Berberine family protein [Source:NCBI gene (formerly Entrezgene);Acc:839952]			2.3978	3.51346	2.55446	0	2.56619		x	x			x	x
AT1G26380	AT1G26380	FAD-binding Berberine family protein [Source:NCBI gene (formerly Entrezgene);Acc:839180]			4.45471	3.36405	2.93212	2.98345	2.20715				x		x
AT5G39890	AT5G39890	2-aminoethanethiol dioxygenase, putative (DUF1637) [Source:NCBI gene (formerly Entrezgene);Acc:833986]			3.69879	3.43404	2.65957	3.09986	2.15757
AT2G16060	HB1	hemoglobin 1 [Source:NCBI gene (formerly Entrezgene);Acc:816103]			2.54847	2.60053	2.61328	3.38517	2.14529
AT3G02040	SRG3	senescence-related 3 [Source:NCBI gene (formerly Entrezgene);Acc:821175]			2.08585	2.15427	2.4049	1.78341	2.20635	x	x	x	x	x	x	x
AT3G10040	AT3G10040	sequence-specific DNA binding transcription factor [Source:NCBI gene (formerly Entrezgene);Acc:820165]			2.37213	2.70588	2.03262	2.49919	2.16516					x
AT3G27220	AT3G27220	Galactose oxidase/kelch repeat superfamily protein [Source:NCBI gene (formerly Entrezgene);Acc:822341]			1.54738	2.03203	1.77216	1.63465	1.31535
AT4G19880	AT4G19880	Glutathione S-transferase family protein [Source:NCBI gene (formerly Entrezgene);Acc:827734]			1.0891	1.36377	1.4192	1.06805	1.17673
AT1G10140	AT1G10140	Uncharacterized conserved protein UCP031279 [Source:NCBI gene (formerly Entrezgene);Acc:837551]			1.37038	1.67264	2.26538	1.54162	1.41604
AT1G25550	AT1G25550	myb-like transcription factor family protein [Source:NCBI gene (formerly Entrezgene);Acc:839142]			0.688647	0.984733	1.01431	0.988444	0.916165	x				x
AT1G33055	AT1G33055				4.38742	5.29068	4.91432	4.38742	3.77345
AT1G55810	UKL3	uridine kinase-like 3 [Source:NCBI gene (formerly Entrezgene);Acc:842031]			1.57092	1.4864	1.43796	1.77268	1.21708			x		x
AT1G66180	AT1G66180	Eukaryotic aspartyl protease family protein [Source:NCBI gene (formerly Entrezgene);Acc:842933]			1.18854	0.916195	0.91622	1.23998	1.20814						x	x
AT1G72330	ALAAT2	alanine aminotransferase 2 [Source:NCBI gene (formerly Entrezgene);Acc:843565]			0.540338	0.729292	0.772975	0.635097	0.712484
AT2G15890	MEE14	maternal effect embryo arrest 14 [Source:NCBI gene (formerly Entrezgene);Acc:816085]			2.34691	2.23377	2.84466	2.22094	2.13815
AT2G18670	AT2G18670	RING/U-box superfamily protein [Source:NCBI gene (formerly Entrezgene);Acc:816382]			1.87264	1.36626	1.63084	1.81596	1.49838					x	x	x
AT2G31810	AT2G31810	ACT domain-containing small subunit of acetolactate synthase protein [Source:NCBI gene (formerly Entrezgene);Acc:817738]			1.72102	1.58756	1.76718	1.94088	1.36712					x
AT3G02550	LBD41	LOB domain-containing protein 41 [Source:NCBI gene (formerly Entrezgene);Acc:821112]			2.51623	3.87131	3.4092	2.86377	2.88306	x	x		x	x	x	x
AT3G07350	F21O3.6				1.46129	2.04031	2.31358	1.6331	2.08879			x	x	x	x	x
AT3G10020	AT3G10020	plant/protein [Source:NCBI gene (formerly Entrezgene);Acc:820163]			1.00945	1.57589	1.88279	1.02209	1.19144	x	x	x	x	x	x	x
AT3G14230	RAP2.2	related to AP2 2 [Source:NCBI gene (formerly Entrezgene);Acc:820643]			1.11461	1.13957	1.28	1.35968	1.13168	x		x		x
AT3G20770	EIN3	Ethylene insensitive 3 family protein [Source:NCBI gene (formerly Entrezgene);Acc:821625]			0.717922	0.590367	0.764152	0.804611	0.601454
AT3G23150	ETR2	Signal transduction histidine kinase, hybrid-type, ethylene sensor [Source:NCBI gene (formerly Entrezgene);Acc:821891]			1.38532	1.15952	1.83477	1.5637	1.39903
AT3G30775	ERD5	Methylenetetrahydrofolate reductase family protein [Source:NCBI gene (formerly Entrezgene);Acc:822833]			1.58913	1.45643	1.21063	1.68695	0.994224	x				x	x	x
AT3G58670	AT3G58670	2-aminoethanethiol dioxygenase, putative (DUF1637) [Source:NCBI gene (formerly Entrezgene);Acc:825036]			0.559079	0	0.689074	0.764012	0.717527
AT4G20380	LSD1	LSD1 zinc finger family protein [Source:NCBI gene (formerly Entrezgene);Acc:827786]			0.719461	0	0.611183	0.663228	0
AT4G24230	ACBP3	acyl-CoA-binding domain 3 [Source:NCBI gene (formerly Entrezgene);Acc:828524]			2.46922	2.66656	2.98346	2.63125	2.02124					x
AT4G27450	AT4G27450	aluminum induced protein with YGL and LRDR motifs [Source:NCBI gene (formerly Entrezgene);Acc:828854]			3.78159	3.58038	4.09953	4.17638	3.20552	x				x
AT4G27460	CBSX5	Cystathionine beta-synthase (CBS) family protein [Source:NCBI gene (formerly Entrezgene);Acc:828855]			1.90535	2.2183	3.18452	2.78151	2.59816	x
AT4G32480	AT4G32480	sugar phosphate exchanger, putative (DUF506) [Source:NCBI gene (formerly Entrezgene);Acc:829383]			1.42046	2.08046	2.47051	1.57838	1.78032	x	x	x	x	x	x	x
AT4G38470	STY46	ACT-like protein tyrosine kinase family protein [Source:NCBI gene (formerly Entrezgene);Acc:830003]			1.54665	1.87593	2.0059	1.50733	1.23171					x	x
AT5G03730	CTR1	Protein kinase superfamily protein [Source:NCBI gene (formerly Entrezgene);Acc:831748]			1.11053	0.925224	1.03299	1.00685	0.740161		x	x	x		x	x
AT5G15120	AT5G15120	2-aminoethanethiol dioxygenase, putative (DUF1637) [Source:NCBI gene (formerly Entrezgene);Acc:831364]			2.75753	2.8606	3.37257	2.65035	2.07398		x	x	x		x	x
AT5G19120	AT5G19120	Eukaryotic aspartyl protease family protein [Source:NCBI gene (formerly Entrezgene);Acc:832032]			2.18015	2.52526	2.88855	2.52451	2.09212					x
AT5G20250	DIN10	Raffinose synthase family protein [Source:NCBI gene (formerly Entrezgene);Acc:832147]			2.56603	2.64209	2.74494	2.81222	2.38971		x	x	x	x	x	x
AT5G64260	EXL2	EXORDIUM like 2 [Source:NCBI gene (formerly Entrezgene);Acc:836547]			1.43429	1.45364	1.57729	1.29694	1.03759	x	x	x	x	x	x	x
GO enrichment analysis
GO-BP
Enrichment FDR	nGenes	Pathways	Pathway Genes	Fold Enrichment
6.93201e-07	3	GO:0018158 protein oxidation	5	436.232
6.93201e-07	3	GO:0018171 peptidyl-cysteine oxidation	5	436.232
1.22213e-06	3	GO:0003032 detection of oxygen	6	363.526
1.22213e-06	3	GO:0070483 detection of hypoxia	6	363.526
1.27301e-08	4	GO:0009061 anaerobic respiration	9	323.135
5.44303e-76	38	GO:0001666 response to hypoxia	267	103.476
5.44303e-76	38	GO:0036293 response to decreased oxygen levels	271	101.948
3.28314e-59	32	GO:0071456 cellular response to hypoxia	240	96.9404
3.28314e-59	32	GO:0036294 cellular response to decreased oxygen levels	242	96.1392
0.000182542	3	GO:0009593 detection of chemical stimulus	28	77.8985
0.000182542	3	GO:0010104 reg. of ethylene-activated signaling pathway	30	72.7053
9.93493e-38	33	GO:0033554 cellular response to stress	1272	18.8622
0.000182542	5	GO:0009873 ethylene-activated signaling pathway	202	17.9964
4.02577e-39	36	GO:0070887 cellular response to chemical stimulus	1791	14.6141
4.74379e-41	38	GO:0009628 response to abiotic stimulus	2170	12.7318
1.04733e-30	36	GO:0042221 response to chemical	3091	8.46778
3.04092e-31	38	GO:0006950 response to stress	3953	6.98912
GO-MF
Enrichment FDR	nGenes	Pathways	Pathway Genes	Fold Enrichment
2.9469e-06	3	GO:0017172 cysteine dioxygenase activity	5	436.232
0.0383463	1	GO:0003984 acetolactate synthase activity	3	242.351
0.0383463	1	GO:0005344 oxygen carrier activity	3	242.351
0.0383463	1	GO:0004021 L-alanine:2-oxoglutarate aminotransferase activity	5	145.411
0.0383463	1	GO:0004849 uridine kinase activity	5	145.411
0.0383463	1	GO:0019825 oxygen binding	5	145.411
0.0383463	1	GO:0038199 ethylene receptor activity	5	145.411
0.0383463	1	GO:0047274 galactinol-sucrose galactosyltransferase activity	5	145.411
0.0383463	1	GO:0047635 alanine-oxo-acid transaminase activity	5	145.411
0.0383463	1	GO:0051740 ethylene binding	5	145.411
0.000646155	3	GO:0016702 oxidoreductase activity acting on single donors with incorporation of molecular oxygen in	31	70.3599
0.00563694	3	GO:0071949 FAD binding	80	27.2645
0.0383463	2	GO:0004190 aspartic-type endopeptidase activity	75	19.3881
0.0222617	3	GO:0051213 dioxygenase activity	147	14.8378
0.0232687	3	GO:0050660 flavin adenine dinucleotide binding	165	13.2191
0.0222617	8	GO:0016491 oxidoreductase activity	1598	3.63981
0.00862407	13	GO:0036094 small molecule binding	3360	2.813
0.0323832	11	GO:0000166 nucleotide binding	3145	2.54295
0.0323832	11	GO:1901265 nucleoside phosphate binding	3145	2.54295
GO-CC
Enrichment FDR	nGenes	Pathways	Pathway Genes	Fold Enrichment
0.0397462	4	GO:0009505 plant-type cell wall	386	7.53422
0.0397462	4	GO:0005618 cell wall	421	6.90786
0.0397462	4	GO:0030312 external encapsulating structure	450	6.46269
0.0397462	10	GO:0005829 cytosol	2789	2.60686
Transcription factor enrichment analysis
TF-AGRIS
Enrichment FDR	nGenes	Pathways	Pathway Genes	Fold Enrichment
7.49638e-06	10	ATBHLH15 target	749	9.70698
0.00160723	10	BZIP16 target	1631	4.45771
0.00127035	12	GBF5 target	2268	3.84684
0.00229181	11	ABF2 target	2112	3.78673
0.000153347	18	SEPALLATA3 target	4100	3.19194
0.000691773	17	ABI5 target	4189	2.95056
0.0101862	14	AREB3 target	3936	2.58606

## Sheet: Cluster-b
GO- and Transcription Factor- Enrichment analyses of Cluster b genes
Root					Log2FC					TF target
Gene ID	Symbol	Description			Col	adc1	OXCuAO3	cdr7/cuao3	OXPtADC	N.S.
AT1G14540	PER4	Peroxidase superfamily protein			0	1.90576	0	0	0
AT2G25735	AT2G25735	Uncharacterized protein			0	2.40246	0	0	0
AT3G03670	AT3G03670	Peroxidase superfamily protein			0	2.3949	0	0	0
AT5G13320	PBS3	Auxin-responsive GH3 family protein			0	2.70401	0	0	-2.33659
AT5G19230	AT5G19230	Glycoprotein membrane GPI-anchored			0	0.641504	0	0	0
AT5G27420	CNI1	Carbon/nitrogen insensitive 1			0	0.976991	0	0	0
GO enrichment analysis
GO-BP
Enrichment FDR	nGenes	Biological Process (BP)	Pathway Genes	Fold Enrichment
0.00403824	1	GO:0018874 Benzoate metabolic proc.	3	1534.94
0.0043855	1	GO:0098543 Detection of other organism	4	1151.21
1.42893e-11	6	GO:0071456 Cellular response to hypoxia	240	115.121
1.42893e-11	6	GO:0036294 Cellular response to decreased oxygen levels	242	114.169
1.45049e-11	6	GO:0001666 Response to hypoxia	267	103.479
1.45049e-11	6	GO:0036293 Response to decreased oxygen levels	271	101.952
0.00146739	2	GO:0042744 Hydrogen peroxide catabolic proc.	99	93.0269
0.00206862	2	GO:0042743 Hydrogen peroxide metabolic proc.	122	75.4891
0.00400732	2	GO:0098869 Cellular oxidant detoxification	176	52.3277
0.00403824	2	GO:1990748 Cellular detoxification	194	47.4725
0.00403824	2	GO:0097237 Cellular response to toxic substance	195	47.2291
0.00403824	2	GO:0072593 Reactive oxygen species metabolic proc.	199	46.2797
1.08333e-07	6	GO:0033554 Cellular response to stress	1225	22.5543
7.41703e-07	6	GO:0070887 Cellular response to chemical stimulus	1725	16.0168
2.61021e-06	6	GO:0009628 Response to abiotic stimulus	2169	12.7381
1.63144e-05	6	GO:0042221 Response to chemical	2995	9.22504
6.75946e-05	6	GO:0006950 Response to stress	3912	7.06263
GO-MF
Enrichment FDR	nGenes	Molecular Function (MF)	Pathway Genes	Fold Enrichment
0.0177984	1	GO:0016881 Acid-amino acid ligase activity	29	158.787
0.00303811	2	GO:0004601 Peroxidase activity	137	67.2238
0.00303811	2	GO:0016684 Oxidoreductase activity acting on peroxide as acceptor	143	64.4033
0.0377294	1	GO:0016879 Ligase activity forming carbon-nitrogen bonds	72	63.956
0.00303811	2	GO:0016209 Antioxidant activity	167	55.1477
0.011344	2	GO:0020037 Heme binding	385	23.9212
0.011344	2	GO:0046906 Tetrapyrrole binding	421	21.8757
GO-CC
Enrichment FDR	nGenes	Cellular Component (CC)	Pathway Genes	Fold Enrichment
NS
Transcription factor enrichment analysis
TF-AGRIS
Enrichment FDR	nGenes	Transcription Factor Binding Motif	Pathway Genes	Fold Enrichment
NS
Shoot					Log2FC					TF target
Gene ID	Symbol	Description			Col	adc1	OXCuAO3	cdr7/cuao3	OXPtADC	N.S.
AT1G68690	PERK9	Protein kinase superfamily protein			0	0.929286	0	0	0
AT2G46500	PI4K GAMMA 4	Phosphoinositide 4-kinase gamma 4			0	0.404248	0	0	0
AT4G01360	BPS3	BPS1-like protein			0	1.3422	0	0	0
AT4G34131	UGT73B3	UDP-glucosyl transferase 73B3			0	1.37591	0	0	0
AT5G20830	SUS1	Sucrose synthase 1			0	0.589452	0	0	0
AT5G66650	AT5G66650	Calcium uniporter (DUF607)			0	0.704774	0	0	0
GO enrichment analysis
GO-BP
Enrichment FDR	nGenes	Pathways	Pathway Genes	Fold Enrichment
0.00541139	1	GO:0070509 Calcium ion import	3	1534.94
0.00965213	1	GO:0009413 Response to flooding	6	767.472
0.00965213	1	GO:0006851 Mitochondrial calcium ion transmembrane transport	7	657.833
0.00965213	1	GO:0036444 Calcium import into the mitochondrion	7	657.833
0.00965213	1	GO:0051560 Mitochondrial calcium ion homeostasis	7	657.833
0.0208194	1	GO:0010555 Response to mannitol	16	287.802
0.0397523	1	GO:0006874 Intracellular calcium ion homeostasis	34	135.436
1.52797e-11	6	GO:0071456 Cellular response to hypoxia	240	115.121
1.52797e-11	6	GO:0036294 Cellular response to decreased oxygen levels	242	114.169
1.55102e-11	6	GO:0001666 Response to hypoxia	267	103.479
1.55102e-11	6	GO:0036293 Response to decreased oxygen levels	271	101.952
1.15841e-07	6	GO:0033554 Cellular response to stress	1225	22.5543
0.0327803	2	GO:0006970 Response to osmotic stress	557	16.5344
7.93109e-07	6	GO:0070887 Cellular response to chemical stimulus	1725	16.0168
2.79111e-06	6	GO:0009628 Response to abiotic stimulus	2169	12.7381
1.74451e-05	6	GO:0042221 Response to chemical	2995	9.22504
7.22794e-05	6	GO:0006950 Response to stress	3912	7.06263
GO-MF
Enrichment FDR	nGenes	Pathways	Pathway Genes	Fold Enrichment
0.0200929	1	GO:0015292 Uniporter activity	6	767.472
0.0200929	1	GO:0016157 Sucrose synthase activity	9	511.648
0.0200929	1	GO:0047893 Flavonol 3-o-glucosyltransferase activity	11	418.621
0.0200929	1	GO:0004430 1-phosphatidylinositol 4-kinase activity	13	354.218
0.0370376	1	GO:0052742 Phosphatidylinositol kinase activity	30	153.494
0.0398433	1	GO:0005262 Calcium channel activity	39	118.073
0.0398433	1	GO:0001727 Lipid kinase activity	42	109.639
0.0484946	1	GO:0004714 Transmembrane receptor protein tyrosine kinase activity	61	75.4891
0.0484946	1	GO:0080043 Quercetin 3-o-glucosyltransferase activity	64	71.9505
0.0484946	1	GO:0015085 Calcium ion transmembrane transporter activity	67	68.7289
0.0179332	2	GO:0035251 Udp-glucosyltransferase activity	143	64.4033
0.0179332	2	GO:0046527 Glucosyltransferase activity	181	50.8821
0.0200929	2	GO:0008194 Udp-glycosyltransferase activity	302	30.4956
0.0200929	2	GO:0016758 Hexosyltransferase activity	364	25.3013
0.0378495	2	GO:0016757 Glycosyltransferase activity	629	14.6418
0.0484946	2	GO:0004674 Protein serine/threonine kinase activity	865	10.647
0.0368226	4	GO:0016740 Transferase activity	4132	4.45773
GO-CC
Enrichment FDR	nGenes	Pathways	Pathway Genes	Fold Enrichment
0.0220301	1	GO:0034704 Calcium channel complex	7	657.833
0.0220301	1	GO:1990246 Uniplex complex	7	657.833
Transcription factor enrichment analysis
TF-AGRIS
Enrichment FDR	nGenes	Pathways	Pathway Genes	Fold Enrichment
NS

## Sheet: Cluster-c
GO- and Transcription Factor- Enrichment analyses of Cluster c genes
Root					Log2FC					TF target
Gene ID	Symbol	Description			Col	adc1	OXCuAO3	cdr7/cuao3	OXPtADC	N.S.
AT1G03220	AT1G03220	Eukaryotic aspartyl protease family protein [Source:NCBI gene (formerly Entrezgene);Acc:838517]			0.514611	0.60014	0.558749	0	0
AT1G26380	AT1G26380	FAD-binding Berberine family protein [Source:NCBI gene (formerly Entrezgene);Acc:839180]			1.64375	2.76832	1.4951	0	0
AT1G26410	AT1G26410	FAD-binding Berberine family protein [Source:NCBI gene (formerly Entrezgene);Acc:839183]			2.30866	2.78888	1.85653	0	0
AT1G72900	AT1G72900	Toll-Interleukin-Resistance (TIR) domain-containing protein [Source:NCBI gene (formerly Entrezgene);Acc:843621]			1.0783	1.79987	1.37993	0	0
AT1G78850	AT1G78850	D-mannose binding lectin protein with Apple-like carbohydrate-binding domain-containing protein [Source:NCBI gene (formerly Entrezgene);Acc:844222]			0.601259	0.596164	0.758181	0	0
AT2G23270	AT2G23270	transmembrane protein [Source:NCBI gene (formerly Entrezgene);Acc:816859]			2.51254	3.07644	1.97627	0	0
AT2G26560	PLA2A	phospholipase A 2A [Source:NCBI gene (formerly Entrezgene);Acc:817197]			1.82264	3.21519	1.72769	0	0
AT3G07350	F21O3.6				1.44402	1.79088	1.59054	0.693763	0
AT5G26920	CBP60G	Cam-binding protein 60-like G [Source:NCBI gene (formerly Entrezgene);Acc:832750]			0.909058	1.95645	1.04666	0	0
AT5G57220	CYP81F2	cytochrome P450, family 81, subfamily F, polypeptide 2 [Source:NCBI gene (formerly Entrezgene);Acc:835828]			1.49334	1.94334	1.20874	0	0
AT5G65207	AT5G65207				0.791058	1.33537	1.20294	0	0
GO enrichment analysis
GO-BP
Enrichment FDR	nGenes	Biological Process (BP)	Pathway Genes	Fold Enrichment
1.16108e-21	11	GO:0071456 cellular response to hypoxia	240	115.117
1.16108e-21	11	GO:0036294 cellular response to decreased oxygen levels	242	114.165
2.15435e-21	11	GO:0001666 response to hypoxia	267	103.476
2.15435e-21	11	GO:0070482 response to oxygen levels	272	101.574
0.00547961	2	GO:0009626 plant-type hypersensitive response	87	57.7388
0.00547961	2	GO:0034050 programmed cell death induced by symbiont	88	57.0826
0.00547961	2	GO:0051702 biological proc. involved in interaction with symbiont	89	56.4413
3.16506e-05	4	GO:0045087 innate immune response	254	39.5533
4.45047e-05	4	GO:0006955 immune response	282	35.626
4.51522e-05	4	GO:0002376 immune system proc.	288	34.8838
5.07702e-14	11	GO:0033554 cellular response to stress	1272	21.7201
1.93989e-12	11	GO:0070887 cellular response to chemical stimulus	1791	15.426
1.43208e-11	11	GO:0009628 response to abiotic stimulus	2170	12.7318
6.36109e-10	11	GO:0042221 response to chemical	3091	8.93821
0.00801704	4	GO:0098542 defense response to other organism	1178	8.52848
0.00351822	5	GO:0006952 defense response	1704	7.36983
7.96424e-09	11	GO:0006950 response to stress	3953	6.98912
GO-MF
Enrichment FDR	nGenes	Molecular Function (MF)	Pathway Genes	Fold Enrichment
0.0268652	1	GO:0005539 glycosaminoglycan binding	3	837.212
0.0201489	2	GO:0071949 FAD binding	80	62.7909
0.0282308	2	GO:0050660 flavin adenine dinucleotide binding	165	30.4441
GO-CC
Enrichment FDR	nGenes	Cellular Component (CC)	Pathway Genes	Fold Enrichment
0.0495832	2	GO:0099503 secretory vesicle	173	29.0363
Transcription factor enrichment analysis
TF-AGRIS
Enrichment FDR	nGenes	Transcription Factor Binding Motif	Pathway Genes	Fold Enrichment
NS
Shoot					Log2FC					TF target
Gene ID	Symbol	Description			Col	adc1	OXCuAO3	cdr7/cuao3	OXPtADC	N.S.
AT5G41080	HRS1	Myb-like transcription factor family protein			1.57603	2.14603	1.89162	0	0
AT5G19550	AT1G68670	Myb-like transcription factor family protein			0.843895	0.874251	0.7549	0	0
AT1G13300	AT1G69890	Actin cross-linking protein (DUF569)			1.38555	1.44955	1.69656	0	0
AT1G72360	ERF73	Integrase-type DNA-binding superfamily protein			0.870354	0.998069	1.03138	0	0
AT1G69890	PSK4	Phytosulfokine 4			1.15526	2.12328	2.3313	0	0
AT3G49780	XTH18	Xyloglucan endotransglucosylase/hydrolase 18			0.871665	1.50804	1.45572	0	0
AT1G68670	ASP2	Aspartate aminotransferase 2			0.405206	0.753187	0.694127	0	0
AT4G30280	GDPD2	PLC-like phosphodiesterases superfamily protein			0.708203	1.83548	1.86262	0	0
GO enrichment analysis
GO-BP
Enrichment FDR	nGenes	Pathways	Pathway Genes	Fold Enrichment
0.00972644	1	GO:0046475 Glycerophospholipid catabolic proc.	3	1151.21
0.00972644	1	GO:0071454 Cellular response to anoxia	3	1151.21
0.0151937	1	GO:0006103 2-oxoglutarate metabolic proc.	5	690.725
0.0162046	1	GO:0006531 Aspartate metabolic proc.	6	575.604
0.0162046	1	GO:0071731 Response to nitric oxide	6	575.604
0.0170716	1	GO:0034059 Response to anoxia	7	493.375
1.72764e-15	8	GO:0071456 Cellular response to hypoxia	240	115.121
1.72764e-15	8	GO:0036294 Cellular response to decreased oxygen levels	242	114.169
2.22897e-15	8	GO:0001666 Response to hypoxia	267	103.479
2.22897e-15	8	GO:0036293 Response to decreased oxygen levels	271	101.952
0.00853592	2	GO:1901698 Response to nitrogen compound	136	50.7886
0.0170716	2	GO:0045892 Neg. reg. of dna-templated transcription	246	28.0783
3.50648e-10	8	GO:0033554 Cellular response to stress	1225	22.5543
4.7752e-09	8	GO:0070887 Cellular response to chemical stimulus	1725	16.0168
2.66103e-08	8	GO:0009628 Response to abiotic stimulus	2169	12.7381
3.17643e-07	8	GO:0042221 Response to chemical	2995	9.22504
2.24764e-06	8	GO:0006950 Response to stress	3912	7.06263
GO-MF
Enrichment FDR	nGenes	Pathways	Pathway Genes	Fold Enrichment
1.8922e-05	2	GO:0001217 Dna-binding transcription repressor activity	4	1726.81
0.0497586	1	GO:0004069 L-aspartate:2-oxoglutarate aminotransferase activity	8	431.703
GO-CC
Enrichment FDR	nGenes	Pathways	Pathway Genes	Fold Enrichment
0.0045231	3	GO:0030312 External encapsulating structure	450	23.0242
Transcription factor enrichment analysis
TF-AGRIS
Enrichment FDR	nGenes	Pathways	Pathway Genes	Fold Enrichment
NS	N.S

## Sheet: Cluster-d
GO- and Transcription Factor- Enrichment analyses of Cluster d genes
Root					Log2FC					TF target
Gene ID	Symbol	Description			Col	adc1	OXCuAO3	cdr7/cuao3	OXPtADC	N.S.
AT1G19530	AT1G19530	DNA polymerase epsilon catalytic subunit A [Source:NCBI gene (formerly Entrezgene);Acc:838540]			1.12946	1.68962	1.8278	1.57148	0
AT1G30720	AT1G30720	FAD-binding Berberine family protein [Source:NCBI gene (formerly Entrezgene);Acc:839952]			1.10959	1.17814	1.3096	1.47432	0
AT1G55810	UKL3	uridine kinase-like 3 [Source:NCBI gene (formerly Entrezgene);Acc:842031]			0.4276	0	0.438265	0.65518	0
AT4G24230	ACBP3	acyl-CoA-binding domain 3 [Source:NCBI gene (formerly Entrezgene);Acc:828524]			0.943002	1.00908	1.14392	0.931858	0
AT5G20250	DIN10	Raffinose synthase family protein [Source:NCBI gene (formerly Entrezgene);Acc:832147]			1.03793	1.38701	1.26544	1.41241	0
AT5G25110	CIPK25	CBL-interacting protein kinase 25 [Source:NCBI gene (formerly Entrezgene);Acc:832582]			1.11497	1.18499	0.981915	1.29079	0
AT5G41080	GDPD2	PLC-like phosphodiesterases superfamily protein [Source:NCBI gene (formerly Entrezgene);Acc:834110]			0.892915	0.691382	0.991982	0.711912	0
GO enrichment analysis
GO-BP
Enrichment FDR	nGenes	Biological Process (BP)	Pathway Genes	Fold Enrichment
0.00882692	1	GO:0046475 glycerophospholipid catabolic proc.	3	1315.62
0.0127458	1	GO:0044211 CTP salvage	5	789.371
0.0127458	1	GO:0010138 pyrimidine ribonucleotide salvage	6	657.81
0.0127458	1	GO:0030007 cellular potassium ion homeostasis	6	657.81
0.0127458	1	GO:0032262 pyrimidine nucleotide salvage	6	657.81
0.0127458	1	GO:0044206 UMP salvage	6	657.81
0.0172013	1	GO:0009061 anaerobic respiration	9	438.54
0.0172013	1	GO:0046503 glycerolipid catabolic proc.	9	438.54
4.17755e-13	7	GO:0001666 response to hypoxia	267	103.476
4.17755e-13	7	GO:0036293 response to decreased oxygen levels	271	101.948
7.42399e-11	6	GO:0071456 cellular response to hypoxia	240	98.6714
7.42399e-11	6	GO:0036294 cellular response to decreased oxygen levels	242	97.856
1.1954e-06	6	GO:0033554 cellular response to stress	1272	18.6173
7.35189e-06	6	GO:0070887 cellular response to chemical stimulus	1791	13.2223
3.94252e-07	7	GO:0009628 response to abiotic stimulus	2170	12.7318
5.97379e-06	7	GO:0051716 cellular response to stimulus	3315	8.33424
0.000155531	6	GO:0042221 response to chemical	3091	7.66132
1.67744e-05	7	GO:0006950 response to stress	3953	6.98912
GO-MF
Enrichment FDR	nGenes	Molecular Function (MF)	Pathway Genes	Fold Enrichment
0.0126614	1	GO:0004849 uridine kinase activity	5	789.371
0.0126614	1	GO:0047274 galactinol-sucrose galactosyltransferase activity	5	789.371
0.0126614	1	GO:0000062 fatty-acyl-CoA binding	6	657.81
0.0126614	1	GO:0004845 uracil phosphoribosyltransferase activity	6	657.81
0.0126614	1	GO:0120227 acyl-CoA binding	6	657.81
0.0126614	1	GO:1901567 fatty acid derivative binding	6	657.81
0.0180799	1	GO:0019206 nucleoside kinase activity	10	394.686
0.0205592	1	GO:0008889 glycerophosphodiester phosphodiesterase activity	13	303.604
0.0360422	1	GO:0019205 nucleobase-containing compound kinase activity	39	101.201
0.0360422	1	GO:1901681 sulfur compound binding	40	98.6714
0.0369873	1	GO:0008378 galactosyltransferase activity	44	89.7013
0.0440751	1	GO:0008081 phosphoric diester hydrolase activity	56	70.4796
0.048837	1	GO:0016763 pentosyltransferase activity	66	59.8009
0.0360422	2	GO:0016757 glycosyltransferase activity	629	12.5496
0.0220635	4	GO:0000166 nucleotide binding	3145	5.01985
0.0220635	4	GO:1901265 nucleoside phosphate binding	3145	5.01985
0.0256059	4	GO:0036094 small molecule binding	3360	4.69864
GO-CC
Enrichment FDR	nGenes	Cellular Component (CC)	Pathway Genes	Fold Enrichment
NS
Transcription factor enrichment analysis
TF-AGRIS
Enrichment FDR	nGenes	Transcription Factor Binding Motif	Pathway Genes	Fold Enrichment
NS
Shoot					Log2FC					TF target
Gene ID	Symbol	Description			Col	adc1	OXCuAO3	cdr7/cuao3	OXPtADC	N.S.
AT1G03220	AT1G03220	Eukaryotic aspartyl protease family protein [Source:NCBI gene (formerly Entrezgene);Acc:838517]			1.13617	1.37009	1.09712	0.991562	0.707567
AT1G15010	AT1G15010	mediator of RNA polymerase II transcription subunit [Source:NCBI gene (formerly Entrezgene);Acc:838066]			1.35693	1.99278	2.35912	2.0873	0
AT1G19530	AT1G19530	DNA polymerase epsilon catalytic subunit A [Source:NCBI gene (formerly Entrezgene);Acc:838540]			4.15995	3.64416	3.61439	5.96683	0
AT1G26270	AT1G26270	Phosphatidylinositol 3- and 4-kinase family protein [Source:NCBI gene (formerly Entrezgene);Acc:839168]			0.745129	0.782472	0.692753	0.436731	0
AT1G53910	RAP2.12	related to AP2 12 [Source:NCBI gene (formerly Entrezgene);Acc:841829]			0.381382	0.419751	0.34842	0.32968	0
AT2G26560	PLA2A	phospholipase A 2A [Source:NCBI gene (formerly Entrezgene);Acc:817197]			2.70837	2.95649	4.03346	2.57627	1.36051
AT2G41430	ERD15	dehydration-induced protein (ERD15) [Source:NCBI gene (formerly Entrezgene);Acc:818741]			0.674625	0.88869	1.13292	0.818065	0
AT3G06435	AT3G06435	Expressed protein [Source:NCBI gene (formerly Entrezgene);Acc:28718918]			1.34144	1.17007	1.10926	1.80328	0
AT3G13310	AT3G13310	Chaperone DnaJ-domain superfamily protein [Source:NCBI gene (formerly Entrezgene);Acc:820531]			0.810835	1.25501	1.28915	0.729939	0
AT3G14100	AT3G14100	RNA-binding (RRM/RBD/RNP motifs) family protein [Source:NCBI gene (formerly Entrezgene);Acc:820626]			0.53352	0.457032	0.549651	0.435786	0
AT4G01250	WRKY22	WRKY family transcription factor [Source:NCBI gene (formerly Entrezgene);Acc:827896]			0.786427	1.52756	1.47953	1.3507	0
AT5G19230	AT5G19230	Glycoprotein membrane GPI-anchored [Source:NCBI gene (formerly Entrezgene);Acc:832043]			1.37236	1.78907	2.05325	1.43209	0
AT5G20230	BCB	blue-copper-binding protein [Source:NCBI gene (formerly Entrezgene);Acc:832145]			1.80014	2.29152	2.86067	1.84133	0.963234
AT5G57220	CYP81F2	cytochrome P450, family 81, subfamily F, polypeptide 2 [Source:NCBI gene (formerly Entrezgene);Acc:835828]			1.87299	2.73552	3.02254	1.6084	1.07176
GO enrichment analysis
GO-BP
Enrichment FDR	nGenes	Pathways	Pathway Genes	Fold Enrichment
0.0320384	1	GO:0003032 detection of oxygen	6	328.905
0.0320384	1	GO:0070483 detection of hypoxia	6	328.905
6.30568e-25	13	GO:0071456 cellular response to hypoxia	240	106.894
6.30568e-25	13	GO:0036294 cellular response to decreased oxygen levels	242	106.011
4.03554e-27	14	GO:0001666 response to hypoxia	267	103.476
4.03554e-27	14	GO:0036293 response to decreased oxygen levels	271	101.948
0.0272439	2	GO:0009642 response to light intensity	143	27.6004
1.39262e-15	13	GO:0033554 cellular response to stress	1272	20.1687
6.6518e-16	14	GO:0070887 cellular response to chemical stimulus	1791	15.426
7.66945e-15	14	GO:0009628 response to abiotic stimulus	2170	12.7318
9.8947e-13	14	GO:0042221 response to chemical	3091	8.93821
2.5978e-11	14	GO:0006950 response to stress	3953	6.98912
0.00849312	5	GO:0043207 response to external biotic stimulus	1485	6.64454
0.00849312	5	GO:0051707 response to other organism	1485	6.64454
0.00849312	5	GO:0044419 biological proc. involved in interspecies interaction between organisms	1507	6.54754
GO-MF
Enrichment FDR	nGenes	Pathways	Pathway Genes	Fold Enrichment
NS
GO-CC
Enrichment FDR	nGenes	Pathways	Pathway Genes	Fold Enrichment
NS
Transcription factor enrichment analysis
TF-AGRIS
Enrichment FDR	nGenes	Pathways	Pathway Genes	Fold Enrichment
NS

## Sheet: Cluster-e
GO- and Transcription Factor- Enrichment analyses of Cluster e genes
Root					Log2FC					TF target
Gene ID	Symbol	Description			Col	adc1	OXCuAO3	cdr7/cuao3	OXPtADC	N.S.
AT1G67360	AT1G67360	Rubber elongation factor protein (REF)			-0.984369	-1.22518	-1.18544	-1.29636	-0.992295
AT2G36580	AT2G36580	Pyruvate kinase family protein			-0.380413	-0.654796	-0.743803	0	-0.756851
AT5G58070	TIL	Temperature-induced lipocalin			-0.984625	-0.590121	-0.532809	-0.701718	-0.551343
GO enrichment analysis
GO-BP
Enrichment FDR	nGenes	Biological Process (BP)	Pathway Genes	Fold Enrichment
0.0052732	1	GO:0006883 Intracellular sodium ion homeostasis	4	2302.42
0.0052732	1	GO:0055081 Monoatomic anion homeostasis	4	2302.42
0.0052732	1	GO:1901562 Response to paraquat	5	1841.93
0.0052732	1	GO:1902884 Pos. reg. of response to oxidative stress	5	1841.93
0.00664327	1	GO:0055078 Sodium ion homeostasis	9	1023.3
0.00664327	1	GO:1902882 Reg. of response to oxidative stress	9	1023.3
2.13915e-05	3	GO:0071456 Cellular response to hypoxia	240	115.121
2.13915e-05	3	GO:0036294 Cellular response to decreased oxygen levels	242	114.169
2.13915e-05	3	GO:0001666 Response to hypoxia	267	103.479
2.13915e-05	3	GO:0036293 Response to decreased oxygen levels	271	101.952
0.0042855	2	GO:0048584 Pos. reg. of response to stimulus	270	68.2198
0.00571346	2	GO:0080134 Reg. of response to stress	414	44.4911
0.00571346	2	GO:0009414 Response to water deprivation	418	44.0654
0.00571346	2	GO:0009415 Response to water	429	42.9355
0.00617355	2	GO:0001101 Response to acid chemical	459	40.1293
0.00168942	3	GO:0033554 Cellular response to stress	1225	22.5543
0.00413059	3	GO:0070887 Cellular response to chemical stimulus	1725	16.0168
0.0052732	3	GO:0009628 Response to abiotic stimulus	2169	12.7381
GO-MF
Enrichment FDR	nGenes	Molecular Function (MF)	Pathway Genes	Fold Enrichment
0.0150485	1	GO:0004743 Pyruvate kinase activity	14	657.833
0.0150485	1	GO:0030955 Potassium ion binding	14	657.833
0.0150485	1	GO:0031420 Alkali metal ion binding	16	575.604
0.0190381	1	GO:0045735 Nutrient reservoir activity	27	341.099
GO-CC
Enrichment FDR	nGenes	Cellular Component (CC)	Pathway Genes	Fold Enrichment
0.0182226	1	GO:0009898 Cytoplasmic side of plasma membrane	29	317.575
0.0192294	1	GO:0098552 Side of membrane	38	242.36
0.0219966	1	GO:0005811 Lipid droplet	58	158.787
0.0182226	2	GO:0000325 Plant-type vacuole	818	22.5175
0.00259322	3	GO:0005783 Endoplasmic reticulum	1251	22.0855
0.0215339	2	GO:0005773 Vacuole	1188	15.5045
0.0113347	3	GO:0012505 Endomembrane system	2576	10.7255
Transcription factor enrichment analysis
TF-AGRIS
Enrichment FDR	nGenes	Transcription Factor Binding Motif	Pathway Genes	Fold Enrichment
NS
Shoot					Log2FC					TF target
Gene ID	Symbol	Description			Col	adc1	OXCuAO3	cdr7/cuao3	OXPtADC	N.S.
AT1G54050	AT1G54050	HSP20-like chaperones superfamily protein			-1.56263	-1.56044	-1.21066	-2.04272	-1.68799
AT1G67360	AT1G67360	Rubber elongation factor protein (REF)			-1.64593	-1.32453	-1.64585	-1.98064	-1.58111
AT1G78070	AT1G78070	Transducin/WD40 repeat-like superfamily protein			-1.09982	-0.772799	-1.32238	-1.74051	-1.18961
AT2G41090	AT2G41090	Calcium-binding EF-hand family protein			-1.01028	-0.698447	0	-0.657323	-0.849569
AT3G22550	AT3G22550	NAD(P)H-quinone oxidoreductase subunit, putative (DUF581)			-1.00755	-1.09315	-0.965207	-0.970873	-0.859744
AT4G11660	AT-HSFB2B	Winged-helix DNA-binding transcription factor family protein			-1.41756	-1.68886	-1.57451	-1.37975	-1.22537
AT5G19240	AT5G19240	Glycoprotein membrane GPI-anchored			-2.04906	0	-1.04039	-1.71344	-1.56814
AT5G54470	BBX29	B-box type zinc finger family protein			-2.51079	-2.09653	-2.30993	-1.83463	-1.92978
GO enrichment analysis
GO-BP
Enrichment FDR	nGenes	Pathways	Pathway Genes	Fold Enrichment
0.0191626	1	GO:2000082 Reg. of l-ascorbic acid biosynthetic proc.	7	493.375
0.0260844	1	GO:0030656 Reg. of vitamin metabolic proc.	11	313.966
0.0260844	1	GO:0034389 Lipid droplet organization	11	313.966
0.0313691	1	GO:0080186 Developmental vegetative growth	15	230.242
0.0355381	1	GO:1902584 Pos. reg. of response to water deprivation	18	191.868
1.26488e-15	8	GO:0071456 Cellular response to hypoxia	240	115.121
1.26488e-15	8	GO:0036294 Cellular response to decreased oxygen levels	242	114.169
1.63193e-15	8	GO:0001666 Response to hypoxia	267	103.479
1.63193e-15	8	GO:0036293 Response to decreased oxygen levels	271	101.952
2.56725e-10	8	GO:0033554 Cellular response to stress	1225	22.5543
0.0313691	2	GO:0009555 Pollen development	352	19.6229
3.49613e-09	8	GO:0070887 Cellular response to chemical stimulus	1725	16.0168
0.0451329	2	GO:0006979 Response to oxidative stress	453	15.2478
0.0451329	2	GO:0048229 Gametophyte development	463	14.9185
1.94825e-08	8	GO:0009628 Response to abiotic stimulus	2169	12.7381
2.3256e-07	8	GO:0042221 Response to chemical	2995	9.22504
1.6456e-06	8	GO:0006950 Response to stress	3912	7.06263
GO-MF
Enrichment FDR	nGenes	Pathways	Pathway Genes	Fold Enrichment
NS
GO-CC
Enrichment FDR	nGenes	Pathways	Pathway Genes	Fold Enrichment
NS
Transcription factor enrichment analysis
TF-AGRIS
Enrichment FDR	nGenes	Pathways	Pathway Genes	Fold Enrichment
NS

## Sheet: Cluster-f
GO- and Transcription Factor- Enrichment analyses of Cluster f genes
Root					Log2FC					TF target
Gene ID	Symbol	Description			Col	adc1	OXCuAO3	cdr7/cuao3	OXPtADC	HY5	CAMTA5	ATBHLH15	CAMTA1	WRKY3	AT1G44830	LOB	AT5G18450	WRKY20	SEPALLATA3	ESE3	AT3G42860	AT2G15740	LFY	WRKY14	RRTF1	WRKY33	ABI5	ERF4	ANAC042
AT1G01720	ATAF1	NAC (No Apical Meristem) domain transcriptional regulator superfamily protein			-0.411378	0	0	0	0		x	x					x		x	x		x	x		x		x	x	x
AT1G07135	AT1G07135	Glycine-rich protein			-1.81186	0	0	0	0	x			x		x		x		x	x					x
AT1G07150	MAPKKK13	Mitogen-activated protein kinase kinase kinase 13			-0.867993	0	0	0	0			x	x	x				x	x		x			x		x	x
AT1G09070	SRC2	Soybean regulated by cold-2			-0.916716	0	0	0	0	x	x		x		x	x	x		x	x		x			x			x	x
AT1G13360	AT1G13360	Uncharacterized protein			-0.359714	0	0	0	0				x						x			x	x					x
AT1G15010	AT1G15010	Mediator of RNA polymerase II transcription subunit			-1.35017	0	0	0	0				x												x
AT1G18300	NUDT4	Nudix hydrolase homolog 4			-1.62969	0	0	0	0	x	x		x									x		x					x
AT1G22220	AUF2	F-box family protein			-0.418107	0	0	0	0		x		x		x					x
AT1G23710	AT1G23710				-0.604273	0	0	0	0			x	x	x				x	x		x	x	x	x		x	x	x	x
AT1G26270	AT1G26270	Phosphatidylinositol 3- and 4-kinase family protein			-0.332073	0	0	0	0			x	x					x	x							x	x
AT1G27730	STZ	Salt tolerance zinc finger			-1.23227	0	0	0	0		x		x	x		x		x		x	x		x	x		x
AT1G50740	AT1G50740	Transmembrane proteins 14C			-1.06971	0	0	0	0
AT1G53840	PME1	Pectin methylesterase 1			-0.498534	0	0	0	0								x		x						x			x	x
AT1G72920	AT1G72920	Toll-Interleukin-Resistance (TIR) domain family protein			-1.26848	0	0	0	0
AT2G01150	RHA2B	RING-H2 finger protein 2B			-0.987027	0	0	0	0			x							x
AT2G22500	UCP5	Uncoupling protein 5			-0.692409	0	0	0	0	x						x				x	x	x	x		x	x	x
AT2G33590	CRL1	NAD(P)-binding Rossmann-fold superfamily protein			-0.327785	0	0	0	0										x
AT2G40000	HSPRO2	Ortholog of sugar beet HS1 PRO-1 2			-0.906802	0	0	0	0				x				x		x	x		x						x
AT2G40140	CZF1	Zinc finger (CCCH-type) family protein			-0.769874	0	0	0	0				x						x								x
AT2G41010	CAMBP25	Calmodulin (CAM)-binding protein of 25 kDa			-0.801834	0	0	0	0				x						x	x			x		x	x	x	x
AT3G15210	ERF4	Ethylene responsive element binding factor 4			-0.589249	0	0	0	0		x	x	x			x	x		x	x		x	x		x		x	x
AT3G23170	AT3G23170	Uncharacterized protein			-0.750192	0	0	0	0				x		x		x		x	x		x	x		x			x
AT3G25250	AGC2-1	AGC (cAMP-dependent, cGMP-dependent and protein kinase C) kinase family protein			-0.86217	0	0	0	0	x					x			x	x	x		x		x		x		x	x
AT3G28910	MYB30	Myb domain protein 30			-0.509911	0	0	0	0				x						x				x	x		x			x
AT3G52430	PAD4	Alpha/beta-Hydrolases superfamily protein			-0.554693	0	0	0	0						x		x		x	x		x			x		x	x	x
AT3G52800	AT3G52800	A20/AN1-like zinc finger family protein			-0.763864	0	0	0	0				x	x	x	x			x	x	x			x		x	x
AT3G55980	SZF1	Salt-inducible zinc finger 1			-1.24553	0	0	0	0	x	x	x	x	x				x	x				x	x		x			x
AT3G56880	AT3G56880	VQ motif-containing protein			-0.800108	0	0	0	0	x			x		x			x	x	x	x			x	x	x		x	x
AT4G01250	WRKY22	WRKY family transcription factor			-1.21913	0	0	0	0		x	x	x						x	x	x			x		x			x
AT4G11660	AT-HSFB2B	Winged-helix DNA-binding transcription factor family protein			-0.98163	0	0	0	0						x		x			x					x			x
AT4G12720	NUDT7	MutT/nudix family protein			-0.752344	0	0	0	0
AT4G30280	XTH18	Xyloglucan endotransglucosylase/hydrolase 18			-0.660734	0	0	0	0												x			x		x
AT4G30440	GAE1	UDP-D-glucuronate 4-epimerase 1			-0.572339	0	0	0	0					x			x	x	x	x	x	x		x	x	x	x		x
AT4G34150	AT4G34150	Calcium-dependent lipid-binding (CaLB domain) family protein			-1.16402	0	0	0	0	x			x	x				x			x			x		x
AT5G06320	NHL3	NDR1/HIN1-like 3			-0.941364	0	0	0	0				x	x		x	x	x		x	x			x	x	x	x	x	x
AT5G13190	GILP	GSH-induced LITAF domain protein			-0.687911	0	0	0	0				x	x									x						x
AT5G24590	TIP	TCV-interacting protein			-0.651395	0	0	0	0		x		x
AT5G42050	AT5G42050	DCD (Development and Cell Death) domain protein			-0.555228	0	0	0	0					x	x		x	x		x		x		x		x	x		x
AT5G42380	CML37	Calmodulin like 37			-1.79016	0	0	0	0								x			x					x			x	x
AT5G47910	RBOHD	Respiratory burst oxidase homologue D			-0.459842	0	0	0	0							x		x	x	x				x	x	x		x
AT5G66650	AT5G66650	Calcium uniporter (DUF607)			-0.7945	0	0	0	0	x						x				x		x	x				x
AT5G66985	AT5G66985	Uncharacterized protein			-0.491848	0	0	0	0								x			x							x
GO enrichment analysis
GO-BP
Enrichment FDR	nGenes	Biological Process (BP)	Pathway Genes	Fold Enrichment
1.14389e-79	40	GO:0071456 Cellular response to hypoxia	240	109.639
1.14389e-79	40	GO:0036294 Cellular response to decreased oxygen levels	242	108.733
3.02542e-84	42	GO:0001666 Response to hypoxia	267	103.479
3.02542e-84	42	GO:0036293 Response to decreased oxygen levels	271	101.952
5.59576e-06	6	GO:0012501 Programmed cell death	168	23.494
5.06295e-56	42	GO:0033554 Cellular response to stress	1225	22.5543
9.99262e-06	6	GO:0008219 Cell death	190	20.7737
6.18028e-47	41	GO:0070887 Cellular response to chemical stimulus	1725	15.6355
1.41805e-45	42	GO:0009628 Response to abiotic stimulus	2169	12.7381
1.09591e-39	42	GO:0042221 Response to chemical	2995	9.22504
4.25772e-07	13	GO:0098542 Defense response to other organism	1185	7.21674
7.2809e-35	42	GO:0006950 Response to stress	3912	7.06263
5.48758e-09	17	GO:0006952 Defense response	1707	6.55136
5.40213e-06	13	GO:0043207 Response to external biotic stimulus	1489	5.74334
5.40213e-06	13	GO:0051707 Response to other organism	1489	5.74334
5.59576e-06	13	GO:0044419 Biological proc. involved in interspecies interaction between organisms	1510	5.66347
GO-MF
Enrichment FDR	nGenes	Molecular Function (MF)	Pathway Genes	Fold Enrichment
0.0412931	1	GO:0015117 Thiosulfate transmembrane transporter activity	3	219.278
0.0412931	1	GO:0017077 Oxidative phosphorylation uncoupler activity	3	219.278
0.00305652	2	GO:0000210 Nad+ diphosphatase activity	8	164.458
0.0488932	1	GO:0015141 Succinate transmembrane transporter activity	4	164.458
0.00305652	2	GO:0047631 Adp-ribose diphosphatase activity	10	131.567
0.00522702	2	GO:0004551 Dinucleotide phosphatase activity	16	82.2292
0.0412931	2	GO:0005342 Organic acid transmembrane transporter activity	68	19.348
0.0412931	2	GO:0046943 Carboxylic acid transmembrane transporter activity	68	19.348
0.015665	3	GO:0019900 Kinase binding	142	13.8979
0.00305652	8	GO:0000976 Transcription cis-regulatory region binding	979	5.37555
0.00305652	8	GO:0001067 Transcription regulatory region nucleic acid binding	979	5.37555
0.00305652	8	GO:1990837 Sequence-specific double-stranded dna binding	998	5.27321
0.00522702	8	GO:0003690 Double-stranded dna binding	1112	4.73261
0.00975688	8	GO:0043565 Sequence-specific dna binding	1270	4.14383
0.0111369	9	GO:0003700 Dna-binding transcription factor activity	1660	3.56657
0.015665	9	GO:0140110 Transcription regulator activity	1814	3.26378
0.0149027	11	GO:0003677 Dna binding	2528	2.86241
GO-CC
Enrichment FDR	nGenes	Cellular Component (CC)	Pathway Genes	Fold Enrichment
NS
Transcription factor enrichment analysis
TF-AGRIS
Enrichment FDR	nGenes	Transcription Factor Binding Motif	Pathway Genes	Fold Enrichment
1.48769e-08	9	HY5 target gene	264	22.4261
1.99058e-05	9	CAMTA5 target gene	673	8.79718
0.000335288	8	ATBHLH15 target gene	749	7.02626
1.34334e-13	24	CAMTA1 target gene	2295	6.8793
0.00096105	9	WRKY3 target gene	1216	4.86883
0.000557536	10	AT1G44830 target gene	1401	4.69546
0.00336331	8	LOB target gene	1184	4.44482
3.68423e-05	14	AT5G18450 target gene	2095	4.39602
0.000557536	12	WRKY20 target gene	2018	3.91179
1.48769e-08	24	SEPALLATA3 target gene	4100	3.85073
1.2439e-06	22	ESE3 target gene	4281	3.3806
0.00314719	11	AT3G42860 target gene	2167	3.33926
0.000557536	14	AT2G15740 target gene	2781	3.31164
0.00414137	12	LFY target gene	2679	2.94662
0.0013597	16	WRKY14 target gene	3937	2.67344
0.0013597	16	RRTF1 target gene	3946	2.66734
0.000557536	18	WRKY33 target gene	4472	2.64781
0.00669043	15	ABI5 target gene	4189	2.35557
0.00322713	17	ERF4 target gene	4762	2.34842
0.00473672	17	ANAC042 target gene	4985	2.24336
Shoot					Log2FC					TF target
Gene ID	Symbol	Description			Col	adc1	OXCuAO3	cdr7/cuao3	OXPtADC	TGA9	TGA4	SEPALLATA3
AT1G13260	RAV1	Uncharacterized protein			-0.552803	0	0	0	0	x		x
AT1G27730	STZ	Salt tolerance zinc finger			-1.02375	0	0	0	0
AT1G61340	FBS1	F-box family protein			-0.804026	0	0	0	0	x	x
AT1G66090	AT1G66090	Disease resistance protein (TIR-NBS class)			-0.816639	0	0	0	0
AT1G72910	AT1G72910	Toll-Interleukin-Resistance (TIR) domain-containing protein			-2.0233	0	0	0	0
AT1G72920	AT1G72920	Toll-Interleukin-Resistance (TIR) domain family protein			-1.71133	0	0	0	0
AT1G72940	AT1G72940	Toll-Interleukin-Resistance (TIR) domain-containing protein			-0.553007	0	0	0	0			x
AT2G33590	CRL1	NAD(P)-binding Rossmann-fold superfamily protein			-0.635975	0	0	0	0			x
AT2G36800	DOGT1	Don-glucosyltransferase 1			-0.53807	0	0	0	0	x	x	x
AT2G46400	WRKY46	WRKY DNA-binding protein 46			-1.14013	0	0	0	0	x	x
AT2G47730	GSTF8	Glutathione S-transferase phi 8			-0.584074	0	0	0	0			x
AT3G23170	AT3G23170	Uncharacterized protein			-0.966124	0	0	0	0			x
AT3G56400	WRKY70	WRKY DNA-binding protein 70			-1.38728	0	0	0	0	x	x	x
AT4G19520	AT4G19520	Disease resistance protein (TIR-NBS-LRR class) family			-0.76173	0	0	0	0
AT4G24160	AT4G24160	Alpha/beta-Hydrolases superfamily protein			-0.705396	0	0	0	0	x	x
AT4G24570	DIC2	Dicarboxylate carrier 2			-1.10425	0	0	0	0	x	x	x
AT4G34150	AT4G34150	Calcium-dependent lipid-binding (CaLB domain) family protein			-0.740794	0	0	0	0
AT5G03380	AT5G03380	Heavy metal transport/detoxification superfamily protein			-0.50344	0	0	0	0			x
AT5G04340	ZAT6				-0.752969	0	0	0	0	x	x
AT5G06320	NHL3	NDR1/HIN1-like 3			-0.714283	0	0	0	0
AT5G35735	AT5G35735	Auxin-responsive family protein			-0.554132	0	0.416125	0	0	x	x
AT5G42380	CML37	Calmodulin like 37			-1.53749	0	0	0	0	x
AT5G47910	RBOHD	Respiratory burst oxidase homologue D			-0.477507	0	0	0	0	x	x	x
AT5G54960	PDC2	Pyruvate decarboxylase-2			-0.411601	0	0	0	0
AT5G58070	TIL	Temperature-induced lipocalin			-0.828341	0	0	0	0	x	x	x
AT5G58120	AT5G58120	Disease resistance protein (TIR-NBS-LRR class) family			-0.787403	0	0	0	0
GO enrichment analysis
GO-BP
Enrichment FDR	nGenes	Pathways	Pathway Genes	Fold Enrichment
8.95064e-53	26	GO:0071456 Cellular response to hypoxia	240	115.121
8.95064e-53	26	GO:0036294 Cellular response to decreased oxygen levels	242	114.169
9.89865e-52	26	GO:0001666 Response to hypoxia	267	103.479
1.09487e-51	26	GO:0036293 Response to decreased oxygen levels	271	101.952
5.56573e-05	5	GO:0009611 Response to wounding	233	22.8037
2.42701e-34	26	GO:0033554 Cellular response to stress	1225	22.5543
1.68212e-30	26	GO:0070887 Cellular response to chemical stimulus	1725	16.0168
0.000247601	5	GO:0014070 Response to organic cyclic compound	341	15.5814
7.89123e-05	6	GO:0001101 Response to acid chemical	459	13.8909
5.99564e-28	26	GO:0009628 Response to abiotic stimulus	2169	12.7381
2.47581e-24	26	GO:0042221 Response to chemical	2995	9.22504
3.28694e-07	12	GO:0006952 Defense response	1707	7.47033
2.19629e-21	26	GO:0006950 Response to stress	3912	7.06263
0.000232271	9	GO:1901700 Response to oxygen-containing compound	1675	5.70978
0.000133721	10	GO:0007165 Signal transduction	1980	5.36694
0.000152393	10	GO:0023052 Signaling	2023	5.25286
0.00016122	10	GO:0007154 Cell communication	2049	5.18621
GO-MF
Enrichment FDR	nGenes	Pathways	Pathway Genes	Fold Enrichment
0.0307442	1	GO:0015117 Thiosulfate transmembrane transporter activity	3	354.218
0.0307442	1	GO:0050403 Trans-zeatin o-beta-d-glucosyltransferase activity	3	354.218
0.0307442	1	GO:0050502 Cis-zeatin o-beta-d-glucosyltransferase activity	3	354.218
0.031767	1	GO:0004737 Pyruvate decarboxylase activity	4	265.663
0.031767	1	GO:0015141 Succinate transmembrane transporter activity	4	265.663
0.0365671	1	GO:0015131 Oxaloacetate transmembrane transporter activity	5	212.531
0.0397815	1	GO:0003841 1-acylglycerol-3-phosphate o-acyltransferase activity	7	151.808
0.0397815	1	GO:0004623 Phospholipase a2 activity	7	151.808
0.0397815	1	GO:0042171 Lysophosphatidic acid acyltransferase activity	7	151.808
0.0408996	1	GO:0080046 Quercetin 4-o-glucosyltransferase activity	8	132.832
0.0118036	2	GO:1901681 Sulfur compound binding	40	53.1327
6.02364e-05	5	GO:0043531 Adp binding	174	30.536
0.0408996	2	GO:0004601 Peroxidase activity	137	15.5132
0.00737842	6	GO:0000976 Transcription cis-regulatory region binding	979	6.51269
0.00737842	6	GO:0001067 Transcription regulatory region nucleic acid binding	979	6.51269
0.00737842	6	GO:1990837 Sequence-specific double-stranded dna binding	998	6.3887
0.010526	6	GO:0003690 Double-stranded dna binding	1112	5.73374
0.0151208	6	GO:0043565 Sequence-specific dna binding	1270	5.02041
0.031767	6	GO:0003700 Dna-binding transcription factor activity	1660	3.84092
0.0397815	6	GO:0140110 Transcription regulator activity	1814	3.51484
GO-CC
Enrichment FDR	nGenes	Pathways	Pathway Genes	Fold Enrichment
NS
Transcription factor enrichment analysis
TF-AGRIS
Enrichment FDR	nGenes	Pathways	Pathway Genes	Fold Enrichment
0.00884653	12	TGA9 target gene	3761	3.39055
0.0413165	10	TGA4 target gene	3516	3.02234
0.0413165	11	SEPALLATA3 target gene	4100	2.85102

## Sheet: Cluster-g
GO- and Transcription Factor- Enrichment analyses of Cluster g genes
Root
Gene ID	Symbol	Description
No Cluster
Shoot					Log2FC					TF target
Gene ID	Symbol	Description			Col	adc1	OXCuAO3	cdr7/cuao3	OXPtADC	HY5	FAR1	CAMTA1	GT3A	LBD23
AT1G14540	PER4	Peroxidase superfamily protein			0	2.64722	2.51404	0	0
AT1G17290	AlaAT1	Alanine aminotransferas			0	0.628335	0.662806	0	0
AT1G32928	AT1G32928	Avr9/Cf-9 rapidly elicited protein			0	1.50132	1.3877	0	0		x	x		x
AT1G68620	AT1G68620	Alpha/beta-Hydrolases superfamily protein			0	1.03173	1.22331	0	0	x	x	x	x	x
AT1G72900	AT1G72900	Toll-Interleukin-Resistance (TIR) domain-containing protein			0	0.883347	1.0335	0	0
AT1G73010	PS2	Inorganic pyrophosphatase 1			0	1.69813	1.41957	0	1.17611			x
AT1G73500	MKK9	MAP kinase kinase 9			0	0.783004	0.838102	0	0	x			x	x
AT2G36220	AT2G36220	Uncharacterized protein			0	0.469952	0.791781	0	0	x	x	x		x
AT2G40000	HSPRO2	Ortholog of sugar beet HS1 PRO-1 2			0	0.77457	1.16558	0	0			x
AT2G41100	TCH3	Calcium-binding EF hand family protein			0	1.37416	1.46527	0	0	x
AT3G05120	GID1A	Alpha/beta-Hydrolases superfamily protein			0	0.500547	0.556529	0	0				x
AT3G08720	S6K2	Serine/threonine protein kinase 2			0	0.83279	1.0537	0	0				x
AT3G52800	AT3G52800	A20/AN1-like zinc finger family protein			0	0.705728	0.662341	0	0			x		x
AT4G17230	SCL13	SCARECROW-like 13			0	0.713623	0.70944	0	0		x	x
AT4G20860	AT4G20860	FAD-binding Berberine family protein			0	0.980834	0.768458	0	0			x
AT5G57560	TCH4	Xyloglucan endotransglucosylase/hydrolase family protein			0	0.761636	0.931645	0	0			x
AT5G63790	NAC102	NAC domain containing protein 102			0	0.780936	0.738239	0	0			x	x
AT5G65207	AT5G65207	Uncharacterized protein			0	2.22867	2.99877	0	1.44751
GO enrichment analysis
GO-BP
Enrichment FDR	nGenes	Pathways	Pathway Genes	Fold Enrichment
0.0344694	1	GO:0010729 Pos. reg. of hydrogen peroxide biosynthetic proc.	3	511.648
0.0348583	1	GO:0006522 Alanine metabolic proc.	5	306.989
0.0348583	1	GO:0006524 Alanine catabolic proc.	5	306.989
0.0348583	1	GO:0009652 Thigmotropism	5	306.989
0.0017455	2	GO:0009612 Response to mechanical stimulus	20	153.494
1.06145e-32	17	GO:0071456 Cellular response to hypoxia	240	108.725
1.06145e-32	17	GO:0036294 Cellular response to decreased oxygen levels	242	107.827
4.12443e-32	17	GO:0001666 Response to hypoxia	267	97.7305
4.12443e-32	17	GO:0036293 Response to decreased oxygen levels	271	96.288
0.0269965	2	GO:0042430 Indole-containing compound metabolic proc.	81	37.8999
0.03036	2	GO:1901606 Alpha-amino acid catabolic proc.	89	34.4931
0.0337368	2	GO:0009063 Amino acid catabolic proc.	97	31.6483
6.57325e-21	17	GO:0033554 Cellular response to stress	1225	21.3013
1.96407e-18	17	GO:0070887 Cellular response to chemical stimulus	1725	15.127
8.57016e-17	17	GO:0009628 Response to abiotic stimulus	2169	12.0305
1.83509e-14	17	GO:0042221 Response to chemical	2995	8.71254
1.39865e-12	17	GO:0006950 Response to stress	3912	6.67026
GO-MF
Enrichment FDR	nGenes	Pathways	Pathway Genes	Fold Enrichment
NS
GO-CC
Enrichment FDR	nGenes	Pathways	Pathway Genes	Fold Enrichment
NS
Transcription factor enrichment analysis
TF-AGRIS
Enrichment FDR	nGenes	Pathways	Pathway Genes	Fold Enrichment
0.00142483	4	HY5 target gene	264	23.2567
0.0365684	4	FAR1 target gene	749	8.1973
4.57307e-05	10	CAMTA1 target gene	2295	6.68821
0.0365684	5	GT3A target gene	1235	6.21435
0.0365684	5	LBD23 target gene	1361	5.63903

## Sheet: Cluster-h
GO- and Transcription Factor- Enrichment analyses of Cluster h genes
Root					Log2FC					TF target
Gene ID	Symbol	Description			Col	adc1	OXCuAO3	cdr7/cuao3	OXPtADC	N.S.
AT1G72330	ALAAT2	Alanine aminotransferase 2			0.721824	0	0	0	0
AT1G77120	ADH1	Alcohol dehydrogenase 1			0.532095	0	0	0	0
AT2G44800	AT2G44800	2-oxoglutarate (2OG) and Fe(II)-dependent oxygenase superfamily protein			1.01154	0	0	0	0
AT3G02550	LBD41	LOB domain-containing protein 41			0.676088	0	0	0	0
AT3G24715	AT3G24715	Kinase superfamily with octicosapeptide/Phox/Bem1p domain-containing protein			0.452007	0	0	0	0
AT5G03730	CTR1	Protein kinase superfamily protein			0.276806	0	0	0	0
AT5G15120	AT5G15120	2-aminoethanethiol dioxygenase, putative (DUF1637)			0.568691	0	0	0	0
AT5G20830	SUS1	Sucrose synthase 1			0.640792	0	0	0	0
AT5G25250	FLOT1	SPFH/Band 7/PHB domain-containing membrane-associated protein family			0.969803	0	0	0	0
AT5G39890	AT5G39890	2-aminoethanethiol dioxygenase, putative (DUF1637)			0.635638	0	0	0	0
GO enrichment analysis
GO-BP
Enrichment FDR	nGenes	Biological Process (BP)	Pathway Genes	Fold Enrichment
1.80962e-05	2	GO:0018158 Protein oxidation	5	1105.16
1.80962e-05	2	GO:0018171 Peptidyl-cysteine oxidation	5	1105.16
2.23498e-05	2	GO:0003032 Detection of oxygen	6	920.967				``
2.23498e-05	2	GO:0009413 Response to flooding	6	920.967
2.23498e-05	2	GO:0070483 Detection of hypoxia	6	920.967
2.82733e-05	3	GO:0009744 Response to sucrose	76	109.062
2.89749e-05	3	GO:0034285 Response to disaccharide	78	106.265
5.19231e-19	10	GO:0001666 Response to hypoxia	267	103.479
5.19231e-19	10	GO:0036293 Response to decreased oxygen levels	271	101.952
4.90004e-14	8	GO:0071456 Cellular response to hypoxia	240	92.0967
4.90004e-14	8	GO:0036294 Cellular response to decreased oxygen levels	242	91.3355
0.000386154	3	GO:0009743 Response to carbohydrate	188	44.0888
1.45002e-08	8	GO:0033554 Cellular response to stress	1225	18.0434
3.58643e-09	9	GO:0070887 Cellular response to chemical stimulus	1725	14.4151
2.67897e-10	10	GO:0009628 Response to abiotic stimulus	2169	12.7381
3.60757e-07	9	GO:0042221 Response to chemical	2995	8.30254
6.89418e-08	10	GO:0006950 Response to stress	3912	7.06263
GO-MF
Enrichment FDR	nGenes	Molecular Function (MF)	Pathway Genes	Fold Enrichment
6.12745e-05	2	GO:0017172 Cysteine dioxygenase activity	5	1105.16
0.0134347	1	GO:0004021 L-alanine:2-oxoglutarate aminotransferase activity	5	552.58
0.0134347	1	GO:0047635 Alanine-oxo-acid transaminase activity	5	552.58
0.0187963	1	GO:0016157 Sucrose synthase activity	9	306.989
0.0187963	1	GO:0051903 S-(hydroxymethyl)glutathione dehydrogenase [nad(p)+] activity	9	306.989
0.0014175	2	GO:0016702 Oxidoreductase activity acting on single donors with incorporation of molecular oxygen in	31	178.252
0.0350686	1	GO:0004022 Alcohol dehydrogenase (nad+) activity	19	145.416
0.0134347	2	GO:0051213 Dioxygenase activity	147	37.5905
0.0350686	2	GO:0005506 Iron ion binding	368	15.0158
0.0134347	4	GO:0016491 Oxidoreductase activity	1478	7.4774
0.0384887	3	GO:0046914 Transition metal ion binding	1258	6.58879
GO-CC
Enrichment FDR	nGenes	Cellular Component (CC)	Pathway Genes	Fold Enrichment
0.0126637	1	GO:0005901 Caveola	3	920.967
0.0126637	1	GO:0044853 Plasma membrane raft	3	920.967
0.0126637	1	GO:0045121 Membrane raft	3	920.967
0.0158245	1	GO:0098857 Membrane microdomain	5	552.58
Transcription factor enrichment analysis
TF-AGRIS
Enrichment FDR	nGenes	Transcription Factor Binding Motif	Pathway Genes	Fold Enrichment
NS
Shoot					Log2FC					TF target
Gene ID	Symbol	Description			Col	adc1	OXCuAO3	cdr7/cuao3	OXPtADC	N.S.
AT3G02555	AT3G02555	Uncharacterized protein			0.672622	0.704385	0	0	0
AT3G03270	AT3G03270	Adenine nucleotide alpha hydrolases-like superfamily protein			1.03592	1.00785	0	0	0
AT3G43190	SUS4	Sucrose synthase 4			1.72622	1.59982	0	0	0
AT4G33560	AT4G33560	Wound-responsive family protein			1.06781	0	0	0	0
AT5G66985	AT5G66985	Uncharacterized protein			1.73355	0	0	0	0
GO enrichment analysis
GO-BP
Enrichment FDR	nGenes	Pathways	Pathway Genes	Fold Enrichment
0.00999104	1	GO:0005985 Sucrose metabolic proc.	45	122.796
2.37733e-10	5	GO:0071456 Cellular response to hypoxia	240	115.121
2.37733e-10	5	GO:0036294 Cellular response to decreased oxygen levels	242	114.169
2.37733e-10	5	GO:0001666 Response to hypoxia	267	103.479
2.37733e-10	5	GO:0036293 Response to decreased oxygen levels	271	101.952
0.0150195	1	GO:0005984 Disaccharide metabolic proc.	73	75.6959
0.015927	1	GO:0009311 Oligosaccharide metabolic proc.	83	66.5759
3.88583e-07	5	GO:0033554 Cellular response to stress	1225	22.5543
1.88707e-06	5	GO:0070887 Cellular response to chemical stimulus	1725	16.0168
5.27841e-06	5	GO:0009628 Response to abiotic stimulus	2169	12.7381
2.38773e-05	5	GO:0042221 Response to chemical	2995	9.22504
7.57101e-05	5	GO:0006950 Response to stress	3912	7.06263
GO-MF
Enrichment FDR	nGenes	Pathways	Pathway Genes	Fold Enrichment
0.0130222	1	GO:0016157 Sucrose synthase activity	9	613.978
GO-CC
Enrichment FDR	nGenes	Pathways	Pathway Genes	Fold Enrichment
NS
Transcription factor enrichment analysis
TF-AGRIS
Enrichment FDR	nGenes	Pathways	Pathway Genes	Fold Enrichment
NS

[truncated: 2 more sheets: Cluster-i , Cluster-j]
