# Supplementary material
Source: Research Square preprint supplement (doi:10.21203/rs.3.rs-9349369/v1)
Supplement: Supplementary file 2 [file 46d2f50f3c4f4f7f8665aac8.xlsx]

## Sheet: Root-ROS
Supplemental Table S8. Lists of root and shoot DEGs associated with GO:0006979 (Response to Oxidative Stress). These DEGs were clustered based on consistent expression patterns across the five genotypes used in APEX08 (Figure 6B). Organ-specific expression responses to spaceflight conditions are shown for the 5 genotypes included in APEX08. The results of GO- and transcription-factor target enric…
		Root
	Gene ID	Col	adc1	OXCuAO3	cdr7/cuao3	OXPtADC	Symbol	Annotation
a	AT1G65970	0.943285	1.22482	0.894949	0.870474	1.19174	TPX2	thioredoxin-dependent peroxidase 2 [Source:NCBI gene (formerly Entrezgene);Acc:842909]
	AT5G63160	1.27356	1.71989	1.6579	1.35026	1.40643	BT1	BTB and TAZ domain protein 1 [Source:NCBI gene (formerly Entrezgene);Acc:836437]
	AT1G73260	1.51236	1.68088	1.53955	1.47739	1.05238	KTI1	kunitz trypsin inhibitor 1 [Source:NCBI gene (formerly Entrezgene);Acc:843660]
	AT4G35770	1.42526	3.1708	1.83345	1.65228	1.38083	SEN1	Rhodanese/Cell cycle control phosphatase superfamily protein [Source:NCBI gene (formerly Entrezgene);Acc:829730]
	AT5G21940	0.858364	1.39012	1.31121	0	0.915825	AT5G21940	hybrid signal transduction histidine kinase M-like protein [Source:NCBI gene (formerly Entrezgene);Acc:832254]
	AT3G17790	1.84559	1.92268	2.15472	0	1.36878	PAP17	purple acid phosphatase 17 [Source:NCBI gene (formerly Entrezgene);Acc:821047]
	AT4G21830	1.51007	1.22719	1.13424	0	1.18371	MSRB7	methionine sulfoxide reductase B7 [Source:NCBI gene (formerly Entrezgene);Acc:828271]
b	AT4G14030	0.3139	0	0	0	0	SBP1	selenium-binding protein 1 [Source:NCBI gene (formerly Entrezgene);Acc:827039]
	AT1G52760	0.338804	0	0	0	0	LysoPL2	lysophospholipase 2 [Source:NCBI gene (formerly Entrezgene);Acc:841709]
	AT5G58940	0.552527	0	0	0	0	CRCK1	calmodulin-binding receptor-like cytoplasmic kinase 1 [Source:NCBI gene (formerly Entrezgene);Acc:836011]
	AT1G32230	0.307765	0	0	0	0	RCD1	WWE protein-protein interaction domain protein family [Source:NCBI gene (formerly Entrezgene);Acc:840115]
	AT3G57520	0.380727	0	0	0	0	SIP2	seed imbibition 2 [Source:NCBI gene (formerly Entrezgene);Acc:824919]
	AT1G77120	0.532095	0	0	0	0	ADH1	alcohol dehydrogenase 1 [Source:NCBI gene (formerly Entrezgene);Acc:844047]
	AT4G11850	0.29842	0	0	0	0	PLDGAMMA1	phospholipase D gamma 1 [Source:NCBI gene (formerly Entrezgene);Acc:826791]
	AT1G35580	0.276299	0	0	0	0	CINV1	cytosolic invertase 1 [Source:NCBI gene (formerly Entrezgene);Acc:840454]
	AT4G12570	0.332079	0	0	0	0	UPL5	ubiquitin protein ligase 5 [Source:NCBI gene (formerly Entrezgene);Acc:826870]
	AT3G13610	0.643669	0	0	0	0	AT3G13610	2-oxoglutarate (2OG) and Fe(II)-dependent oxygenase superfamily protein [Source:NCBI gene (formerly Entrezgene);Acc:820564]
	AT1G60740	1.32175	0	0	0	0	AT1G60740	Thioredoxin superfamily protein [Source:NCBI gene (formerly Entrezgene);Acc:842368]
	AT5G64100	0.492418	0	0	0	0	AT5G64100	Peroxidase superfamily protein [Source:NCBI gene (formerly Entrezgene);Acc:836531]
c	AT5G64120	0.344278	0.745967	0.674333	0	0	AT5G64120	Peroxidase superfamily protein [Source:NCBI gene (formerly Entrezgene);Acc:836533]
	AT4G11170	1.27083	2.63359	1.584	0	0	AT4G11170	Disease resistance protein (TIR-NBS-LRR class) family [Source:NCBI gene (formerly Entrezgene);Acc:826718]
	AT5G27600	0.475225	0.5746	0.464364	0	0	LACS7	long-chain acyl-CoA synthetase 7 [Source:NCBI gene (formerly Entrezgene);Acc:832820]
	AT1G14870	0.863636	1.01283	0.637589	0	0	PCR2	PLANT CADMIUM RESISTANCE 2 [Source:NCBI gene (formerly Entrezgene);Acc:838052]
	AT5G44380	0.699952	0.691074	0.722032	0	0	AT5G44380	FAD-binding Berberine family protein [Source:NCBI gene (formerly Entrezgene);Acc:834464]
	AT3G01420	0.910521	1.19252	0.947792	0	-0.716495	DOX1	Peroxidase superfamily protein [Source:NCBI gene (formerly Entrezgene);Acc:821135]
d	AT3G10985	0.37248	0.604671	0.591758	0.605074	0	SAG20	senescence associated 20 [Source:NCBI gene (formerly Entrezgene);Acc:2745879]
	AT4G37520	1.02766	1.1185	1.10152	1.24936	0	AT4G37520	Peroxidase superfamily protein [Source:NCBI gene (formerly Entrezgene);Acc:829907]
	AT5G20250	1.03793	1.38701	1.26544	1.41241	0	DIN10	Raffinose synthase family protein [Source:NCBI gene (formerly Entrezgene);Acc:832147]
	AT5G56550	1.77725	1.8332	2.36253	1.53686	0	OXS3	oxidative stress 3 [Source:NCBI gene (formerly Entrezgene);Acc:835756]
	AT3G30775	0	0.56469	0.717196	0.950869	0	ERD5	Methylenetetrahydrofolate reductase family protein [Source:NCBI gene (formerly Entrezgene);Acc:822833]
e	AT5G64940	-1.28322	-0.815891	-1.0662	-1.20107	-0.720355	ATH13	ABC2 homolog 13 [Source:NCBI gene (formerly Entrezgene);Acc:836618]
	AT5G58070	-0.984625	-0.590121	-0.532809	-0.701718	-0.551343	TIL	temperature-induced lipocalin [Source:NCBI gene (formerly Entrezgene);Acc:835919]
f	AT5G06720	-1.20101	0	0	0	0	PA2	peroxidase 2 [Source:NCBI gene (formerly Entrezgene);Acc:830561]
	AT5G19875	-1.1011	0	0	0	0	AT5G19875	transmembrane protein [Source:NCBI gene (formerly Entrezgene);Acc:832109]
	AT1G27730	-1.23227	0	0	0	0	STZ	salt tolerance zinc finger [Source:NCBI gene (formerly Entrezgene);Acc:839666]
	AT4G09010	-1.2581	0	0	0	0	TL29	ascorbate peroxidase 4 [Source:NCBI gene (formerly Entrezgene);Acc:826480]
	AT5G42380	-1.79016	0	0	0	0	CML37	calmodulin like 37 [Source:NCBI gene (formerly Entrezgene);Acc:834244]
	AT3G10930	-0.726074	0	0	0	0	AT3G10930	0
	AT5G46350	-2.70408	0	0	0	0	WRKY8	WRKY DNA-binding protein 8 [Source:NCBI gene (formerly Entrezgene);Acc:834678]
	AT1G68850	-0.417972	0	0	0	0	AT1G68850	Peroxidase superfamily protein [Source:NCBI gene (formerly Entrezgene);Acc:843218]
	AT3G26060	-1.14934	0	0	0	0	PRXQ	Thioredoxin superfamily protein [Source:NCBI gene (formerly Entrezgene);Acc:822203]
	AT2G40000	-0.906802	0	0	0	0	HSPRO2	ortholog of sugar beet HS1 PRO-1 2 [Source:NCBI gene (formerly Entrezgene);Acc:818588]
	AT4G12720	-0.752344	0	0	0	0	NUDT7	MutT/nudix family protein [Source:NCBI gene (formerly Entrezgene);Acc:826884]
	AT5G67480	-0.622453	0	0	0	0	BT4	BTB and TAZ domain protein 4 [Source:NCBI gene (formerly Entrezgene);Acc:836884]
	AT1G44970	-0.562692	0	0	0	0	AT1G44970	Peroxidase superfamily protein [Source:NCBI gene (formerly Entrezgene);Acc:841062]
	AT5G66390	-0.385349	0	0	0	0	AT5G66390	Peroxidase superfamily protein [Source:NCBI gene (formerly Entrezgene);Acc:836771]
	AT3G02840	-2.28647	0	0	0	0	AT3G02840	ARM repeat superfamily protein [Source:NCBI gene (formerly Entrezgene);Acc:821225]
	AT5G59720	-1.16556	0	0	0	0	HSP18.2	heat shock protein 18.2 [Source:NCBI gene (formerly Entrezgene);Acc:836093]
	AT5G52310	-1.40775	0	0	0	0	LTI78	low-temperature-responsive protein 78 (LTI78) / desiccation-responsive protein 29A (RD29A) [Source:NCBI gene (formerly Entrezgene);Acc:835307]
	AT1G79600	-0.463242	0	0	0	0	AT1G79600	Protein kinase superfamily protein [Source:NCBI gene (formerly Entrezgene);Acc:844298]
	AT2G34060	-0.897982	0	0	0	0	AT2G34060	Peroxidase superfamily protein [Source:NCBI gene (formerly Entrezgene);Acc:817967]
	AT5G47650	-0.764615	0	0	0	0	NUDT2	nudix hydrolase homolog 2 [Source:NCBI gene (formerly Entrezgene);Acc:834816]
	AT4G17490	-0.502186	0	0	0	0	ERF6	ethylene responsive element binding factor 6 [Source:NCBI gene (formerly Entrezgene);Acc:827463]
	AT5G60890	-0.279964	0	0	0	0	MYB34	myb domain protein 34 [Source:NCBI gene (formerly Entrezgene);Acc:836210]
	AT5G38000	-0.602913	0	0	0	0	AT5G38000	Zinc-binding dehydrogenase family protein [Source:NCBI gene (formerly Entrezgene);Acc:833779]
	AT4G37610	-0.477591	0	0	0	0	BT5	BTB and TAZ domain protein 5 [Source:NCBI gene (formerly Entrezgene);Acc:829915]
	AT5G01600	-0.440995	0	0	0	0	FER1	ferretin 1 [Source:NCBI gene (formerly Entrezgene);Acc:831720]
	AT4G20830	-1.07816	0	0	0	0	AT4G20830	FAD-binding Berberine family protein [Source:NCBI gene (formerly Entrezgene);Acc:827831]
	AT1G76080	-0.910229	0	0	0	0	CDSP32	chloroplastic drought-induced stress protein of 32 kD [Source:NCBI gene (formerly Entrezgene);Acc:843940]
	AT3G25250	-0.86217	0	0	0	0	AGC2-1	AGC (cAMP-dependent, cGMP-dependent and protein kinase C) kinase family protein [Source:NCBI gene (formerly Entrezgene);Acc:822119]
	AT1G66330	-0.414178	0	0	0	0	AT1G66330	senescence-associated family protein [Source:NCBI gene (formerly Entrezgene);Acc:842950]
	AT4G08780	-0.619125	0	0	0	0	AT4G08780	Peroxidase superfamily protein [Source:NCBI gene (formerly Entrezgene);Acc:826448]
	AT1G53670	-0.576984	0	0	0	0	MSRB1	methionine sulfoxide reductase B 1 [Source:NCBI gene (formerly Entrezgene);Acc:841804]
	AT2G38380	-0.547125	0	0	0	0	AT2G38380	Peroxidase superfamily protein [Source:NCBI gene (formerly Entrezgene);Acc:818419]
	AT3G52960	-0.339041	0	0	0	0	AT3G52960	Thioredoxin superfamily protein [Source:NCBI gene (formerly Entrezgene);Acc:824462]
	AT5G18100	-0.476715	0	0	0	0	CSD3	copper/zinc superoxide dismutase 3 [Source:NCBI gene (formerly Entrezgene);Acc:831928]
	AT4G35090	-0.300827	0	0	0	0	CAT2	catalase 2 [Source:NCBI gene (formerly Entrezgene);Acc:829661]
	AT2G39800	-0.608471	0	0	0	0	P5CS1	delta1-pyrroline-5-carboxylate synthase 1 [Source:NCBI gene (formerly Entrezgene);Acc:818566]
	AT5G06290	-0.607446	0	0	0	0	2-Cys Prx B	2-cysteine peroxiredoxin B [Source:NCBI gene (formerly Entrezgene);Acc:830517]
h	AT2G47180	-1.5791	-0.816106	-1.25446	-1.42938	0	GolS1	galactinol synthase 1 [Source:NCBI gene (formerly Entrezgene);Acc:819331]
	AT2G18150	-1.47465	-1.21119	-1.21226	-1.11366	0	AT2G18150	Peroxidase superfamily protein [Source:NCBI gene (formerly Entrezgene);Acc:816328]
	AT1G09350	-2.38346	-2.59672	-3.30368	-2.86478	0	GolS3	galactinol synthase 3 [Source:NCBI gene (formerly Entrezgene);Acc:837457]
	AT5G40390	-0.647469	-0.895556	-0.823294	-0.942115	0	SIP1	Raffinose synthase family protein [Source:NCBI gene (formerly Entrezgene);Acc:834037]
i	AT5G13930	-1.44207	0	-0.96189	0	0	TT4	Chalcone and stilbene synthase family protein [Source:NCBI gene (formerly Entrezgene);Acc:831241]
	AT4G32770	-1.30289	0	-0.989688	0	0	VTE1	tocopherol cyclase, chloroplast / vitamin E deficient 1 (VTE1) / sucrose export defective 1 (SXD1) [Source:NCBI gene (formerly Entrezgene);Acc:829413]
	AT5G37770	-1.40354	0	-1.05894	0	0	TCH2	EF hand calcium-binding protein family [Source:NCBI gene (formerly Entrezgene);Acc:833755]
	AT3G53260	-0.607547	0	-0.455527	0	0	PAL2	phenylalanine ammonia-lyase 2 [Source:NCBI gene (formerly Entrezgene);Acc:824493]
	AT5G21100	-1.11209	0	-1.05799	0	0	AT5G21100	Plant L-ascorbate oxidase [Source:NCBI gene (formerly Entrezgene);Acc:832234]
	AT3G62030	-0.647734	0	-0.548818	0	0	ROC4	rotamase CYP 4 [Source:NCBI gene (formerly Entrezgene);Acc:825376]
	AT4G25130	-0.582651	0	-0.506814	0	0	PMSR4	peptide met sulfoxide reductase 4 [Source:NCBI gene (formerly Entrezgene);Acc:828616]
	AT5G40370	-0.472747	0	-0.597194	0	0	GRXC2	Glutaredoxin family protein [Source:NCBI gene (formerly Entrezgene);Acc:834035]
j	AT1G53130	0	0	-2.29039	0	0	GRI	Stigma-specific Stig1 family protein [Source:NCBI gene (formerly Entrezgene);Acc:841747]
	AT2G26150	0	0	-2.41829	0	0	HSFA2	heat shock transcription factor A2 [Source:NCBI gene (formerly Entrezgene);Acc:817155]
	AT3G01190	0	0	-0.726282	0	0	AT3G01190	Peroxidase superfamily protein [Source:NCBI gene (formerly Entrezgene);Acc:821314]
	AT4G26970	0	0	-0.549182	0	0	ACO2	aconitase 2 [Source:NCBI gene (formerly Entrezgene);Acc:828805]
k	AT5G05340	-1.23967	0	1.94199	0	0	PRX52	Peroxidase superfamily protein [Source:NCBI gene (formerly Entrezgene);Acc:830416]
	AT2G19810	0	0	0.946397	0	0	OZF1	CCCH-type zinc finger family protein [Source:NCBI gene (formerly Entrezgene);Acc:816500]
	AT1G20630	0	0	0.649454	0	0	CAT1	catalase 1 [Source:NCBI gene (formerly Entrezgene);Acc:838652]
	AT2G22420	0	0	0.630719	0	0	AT2G22420	Peroxidase superfamily protein [Source:NCBI gene (formerly Entrezgene);Acc:816773]
	AT5G64110	0	0	1.45598	0	0	AT5G64110	Peroxidase superfamily protein [Source:NCBI gene (formerly Entrezgene);Acc:836532]
	AT1G56600	0	0	1.15636	0	0	GolS2	galactinol synthase 2 [Source:NCBI gene (formerly Entrezgene);Acc:842114]
l	AT1G02930	0.698615	1.29141	0	0	0	GSTF6	glutathione S-transferase 6 [Source:NCBI gene (formerly Entrezgene);Acc:839515]
	AT1G03850	0.666939	0.924474	0	0	0	GRXS13	Glutaredoxin family protein [Source:NCBI gene (formerly Entrezgene);Acc:839392]
	AT1G71695	0.745981	0.94099	0	0	0	AT1G71695	Peroxidase superfamily protein [Source:NCBI gene (formerly Entrezgene);Acc:843498]

## Sheet: Shoot-ROS
Supplemental Table S8. Lists of root and shoot DEGs associated with GO:0006979 (Response to Oxidative Stress). These DEGs were clustered based on consistent expression patterns across the five genotypes used in APEX08 (Figure 6B). Organ-specific expression responses to spaceflight conditions are shown for the 5 genotypes included in APEX08. The results of GO- and transcription-factor target enric…
		Shoot
	Gene ID	Col	adc1	OXCuAO3	cdr7/cuao3	OXPtADC	Symbol	Annotation
a	AT4G33420	0.556833	1.55079	0.953224	0.769142	0.78718	AT4G33420	Peroxidase superfamily protein [Source:NCBI gene (formerly Entrezgene);Acc:829479]
	AT1G20620	0.959539	0.902185	1.3722	0.605771	0.996133	CAT3	catalase 3 [Source:NCBI gene (formerly Entrezgene);Acc:838651]
	AT2G37130	2.29342	1.55337	2.52115	2.13301	2.35144	AT2G37130	Peroxidase superfamily protein [Source:NCBI gene (formerly Entrezgene);Acc:818289]
	AT5G01600	1.38444	1.23486	1.48805	1.17853	1.59266	FER1	ferretin 1 [Source:NCBI gene (formerly Entrezgene);Acc:831720]
	AT5G67480	1.91528	1.85305	2.2299	1.76047	1.86095	BT4	BTB and TAZ domain protein 4 [Source:NCBI gene (formerly Entrezgene);Acc:836884]
	AT5G39610	2.82689	3.18437	3.53368	2.90123	3.3374	NAC6	NAC domain containing protein 6 [Source:NCBI gene (formerly Entrezgene);Acc:833957]
	AT5G27600	0.715902	0.851645	0.881068	0.749945	0.842304	LACS7	long-chain acyl-CoA synthetase 7 [Source:NCBI gene (formerly Entrezgene);Acc:832820]
	AT3G29035	1.44517	1.846	1.8265	1.16057	2.00211	NAC3	NAC domain containing protein 3 [Source:NCBI gene (formerly Entrezgene);Acc:822547]
	AT3G10985	1.76292	1.68609	1.77672	1.93776	1.16574	SAG20	senescence associated 20 [Source:NCBI gene (formerly Entrezgene);Acc:2745879]
	AT3G57520	1.50706	1.60611	1.49014	1.17578	1.07351	SIP2	seed imbibition 2 [Source:NCBI gene (formerly Entrezgene);Acc:824919]
	AT3G48360	1.92996	2.37089	2.52786	2.0805	2.18259	BT2	BTB and TAZ domain protein 2 [Source:NCBI gene (formerly Entrezgene);Acc:823994]
	AT5G20250	2.56603	2.64209	2.74494	2.81222	2.38971	DIN10	Raffinose synthase family protein [Source:NCBI gene (formerly Entrezgene);Acc:832147]
	AT4G02380	2.19056	2.2603	2.52635	2.49765	1.92948	SAG21	senescence-associated 21 [Source:NCBI gene (formerly Entrezgene);Acc:828053]
	AT5G63160	2.02481	2.19256	2.29022	2.21361	1.84267	BT1	BTB and TAZ domain protein 1 [Source:NCBI gene (formerly Entrezgene);Acc:836437]
	AT5G24890	1.00506	1.18095	1.28005	1.23557	0.930192	AT5G24890	stress response NST1-like protein [Source:NCBI gene (formerly Entrezgene);Acc:832558]
	AT1G52200	1.86607	2.33984	2.74453	2.47363	1.72384	AT1G52200	PLAC8 family protein [Source:NCBI gene (formerly Entrezgene);Acc:841650]
	AT4G31510	0.697508	0.882046	1.22046	0.879826	0.692365	AT4G31510	major centromere autoantigen B-like protein [Source:NCBI gene (formerly Entrezgene);Acc:829278]
	AT3G10020	1.00945	1.57589	1.88279	1.02209	1.19144	AT3G10020	plant/protein [Source:NCBI gene (formerly Entrezgene);Acc:820163]
	AT1G73260	2.28778	1.86034	3.31791	2.12581	1.43152	KTI1	kunitz trypsin inhibitor 1 [Source:NCBI gene (formerly Entrezgene);Acc:843660]
	AT4G37520	1.89277	1.28514	1.48803	2.00916	1.46161	AT4G37520	Peroxidase superfamily protein [Source:NCBI gene (formerly Entrezgene);Acc:829907]
	AT4G35770	4.67678	3.87745	4.67366	4.67678	4.3551	SEN1	Rhodanese/Cell cycle control phosphatase superfamily protein [Source:NCBI gene (formerly Entrezgene);Acc:829730]
	AT3G62770	1.1915	0.630776	1.05388	0.86677	0.824471	AtATG18a	Transducin/WD40 repeat-like superfamily protein [Source:NCBI gene (formerly Entrezgene);Acc:825452]
	AT1G34370	1.22001	1.28372	1.17276	1.25004	1.02746	STOP1	C2H2 and C2HC zinc fingers superfamily protein [Source:NCBI gene (formerly Entrezgene);Acc:840339]
	AT4G12570	1.19514	0.981808	1.17949	1.11086	0.68836	UPL5	ubiquitin protein ligase 5 [Source:NCBI gene (formerly Entrezgene);Acc:826870]
	AT5G54500	0.95093	0.927782	1.02806	0.907755	0.594064	FQR1	flavodoxin-like quinone reductase 1 [Source:NCBI gene (formerly Entrezgene);Acc:835538]
	AT4G17070	1.37951	1.35253	1.41319	1.3911	0.813482	AT4G17070	peptidyl-prolyl cis-trans isomerase [Source:NCBI gene (formerly Entrezgene);Acc:827415]
	AT3G30775	1.58913	1.45643	1.21063	1.68695	0.994224	ERD5	Methylenetetrahydrofolate reductase family protein [Source:NCBI gene (formerly Entrezgene);Acc:822833]
b	AT3G02860	0.565218	0	0	0	0	AT3G02860	zinc ion binding protein [Source:NCBI gene (formerly Entrezgene);Acc:821212]
	AT5G66390	1.28996	0	0	0	0	AT5G66390	Peroxidase superfamily protein [Source:NCBI gene (formerly Entrezgene);Acc:836771]
	AT5G64100	1.44258	0	0	0	0	AT5G64100	Peroxidase superfamily protein [Source:NCBI gene (formerly Entrezgene);Acc:836531]
	AT5G44660	0.701159	0	0	0	0	AT5G44660	0
	AT4G13540	1.17841	0	0	0	0	AT4G13540	golgin family A protein [Source:NCBI gene (formerly Entrezgene);Acc:826986]
	AT5G13240	0.563075	0	0	0	0	AT5G13240	transcription regulator [Source:NCBI gene (formerly Entrezgene);Acc:831164]
	AT5G41150	0.551089	0	0	0	0	UVH1	Restriction endonuclease, type II-like superfamily protein [Source:NCBI gene (formerly Entrezgene);Acc:834117]
	AT3G08670	0.896817	0	0	0	0.734146	AT3G08670	serine/arginine repetitive matrix-like protein [Source:NCBI gene (formerly Entrezgene);Acc:820014]
c	AT4G30170	1.25209	0.892533	1.20631	0	0	AT4G30170	Peroxidase family protein [Source:NCBI gene (formerly Entrezgene);Acc:829140]
	AT4G08770	1.68692	0.894964	1.40168	0	0	Prx37	Peroxidase superfamily protein [Source:NCBI gene (formerly Entrezgene);Acc:826447]
	AT5G44380	1.53516	0.883431	1.21005	0	0	AT5G44380	FAD-binding Berberine family protein [Source:NCBI gene (formerly Entrezgene);Acc:834464]
	AT1G02930	0.8601	0.947649	1.21045	0	0	GSTF6	glutathione S-transferase 6 [Source:NCBI gene (formerly Entrezgene);Acc:839515]
	AT5G16470	0.441147	0.57451	0.61242	0	0	AT5G16470	zinc finger (C2H2 type) family protein [Source:NCBI gene (formerly Entrezgene);Acc:831508]
	AT4G08920	0.384196	0.441159	0.67171	0	0	CRY1	cryptochrome 1 [Source:NCBI gene (formerly Entrezgene);Acc:826470]
	AT5G54810	0.477527	0.390202	0.705494	0	0	TSB1	tryptophan synthase beta-subunit 1 [Source:NCBI gene (formerly Entrezgene);Acc:835571]
	AT3G05970	0.446896	0	0.394979	0	0	LACS6	long-chain acyl-CoA synthetase 6 [Source:NCBI gene (formerly Entrezgene);Acc:819767]
	AT3G21650	0.616177	0	0.537856	0	0	AT3G21650	Protein phosphatase 2A regulatory B subunit family protein [Source:NCBI gene (formerly Entrezgene);Acc:821719]
	AT3G49120	0.486394	0	0.668664	0	0	PRXCB	peroxidase CB [Source:NCBI gene (formerly Entrezgene);Acc:824073]
d	AT4G11850	0.550036	0.763126	1.13249	0.593036	0	PLDGAMMA1	phospholipase D gamma 1 [Source:NCBI gene (formerly Entrezgene);Acc:826791]
	AT1G14870	1.39386	1.91488	2.14429	1.4424	0	PCR2	PLANT CADMIUM RESISTANCE 2 [Source:NCBI gene (formerly Entrezgene);Acc:838052]
	AT2G19810	1.18757	1.88959	1.65415	1.03583	0	OZF1	CCCH-type zinc finger family protein [Source:NCBI gene (formerly Entrezgene);Acc:816500]
	AT1G03850	1.75342	1.79971	2.23377	1.52598	0	GRXS13	Glutaredoxin family protein [Source:NCBI gene (formerly Entrezgene);Acc:839392]
	AT3G20340	2.36617	2.38474	2.61282	2.00348	0	AT3G20340	protein expression protein [Source:NCBI gene (formerly Entrezgene);Acc:821578]
	AT5G56550	1.77432	2.14623	2.39279	1.92172	0	OXS3	oxidative stress 3 [Source:NCBI gene (formerly Entrezgene);Acc:835756]
	AT1G15380	1.23081	1.14533	1.29319	1.33001	0	GLYI4	Lactoylglutathione lyase / glyoxalase I family protein [Source:NCBI gene (formerly Entrezgene);Acc:838107]
	AT4G24520	0.578397	0.453462	0.615961	0.620319	0	ATR1	P450 reductase 1 [Source:NCBI gene (formerly Entrezgene);Acc:828554]
	AT5G20230	1.80014	2.29152	2.86067	1.84133	0.963234	BCB	blue-copper-binding protein [Source:NCBI gene (formerly Entrezgene);Acc:832145]
	AT1G35580	1.13595	1.0003	0.756681	1.16442	0	CINV1	cytosolic invertase 1 [Source:NCBI gene (formerly Entrezgene);Acc:840454]
	AT2G43790	0.746023	0.5545	0.469723	0.445561	0	MPK6	MAP kinase 6 [Source:NCBI gene (formerly Entrezgene);Acc:818982]
	AT1G32230	0.666983	0.385394	0.426763	0.412318	0	RCD1	WWE protein-protein interaction domain protein family [Source:NCBI gene (formerly Entrezgene);Acc:840115]
	AT4G34890	0.800282	0.496335	0.479695	0.677212	0	XDH1	xanthine dehydrogenase 1 [Source:NCBI gene (formerly Entrezgene);Acc:829641]
	AT2G23140	0.633303	0.695045	0.465569	0.525821	0	PUB4	RING/U-box superfamily protein with ARM repeat domain-containing protein [Source:NCBI gene (formerly Entrezgene);Acc:816846]
	AT1G65970	2.00524	1.45508	1.76246	1.89783	0	TPX2	thioredoxin-dependent peroxidase 2 [Source:NCBI gene (formerly Entrezgene);Acc:842909]
	AT1G07530	0.590837	0.553014	0.776592	0.714186	0	SCL14	SCARECROW-like 14 [Source:NCBI gene (formerly Entrezgene);Acc:837267]
	AT1G09970	0.794763	0.77732	0.891105	0.813788	0	LRR XI-23	Leucine-rich receptor-like protein kinase family protein [Source:NCBI gene (formerly Entrezgene);Acc:837531]
	AT5G03280	0.495792	0.50099	0.501368	0.386952	0	EIN2	NRAMP metal ion transporter family protein [Source:NCBI gene (formerly Entrezgene);Acc:831889]
e	AT5G13930	-1.48958	-1.35767	-2.22942	-1.64781	-2.08953	TT4	Chalcone and stilbene synthase family protein [Source:NCBI gene (formerly Entrezgene);Acc:831241]
	AT2G37040	-0.923904	-0.776808	-1.29646	-0.690232	-1.21525	PAL1	PHE ammonia lyase 1 [Source:NCBI gene (formerly Entrezgene);Acc:818280]
	AT3G53260	-0.639166	-0.481372	-0.563625	-0.424987	-0.69084	PAL2	phenylalanine ammonia-lyase 2 [Source:NCBI gene (formerly Entrezgene);Acc:824493]
	AT1G54050	-1.56263	-1.56044	-1.21066	-2.04272	-1.68799	AT1G54050	HSP20-like chaperones superfamily protein [Source:NCBI gene (formerly Entrezgene);Acc:841843]
	AT1G32220	-1.10134	-0.589126	-0.857664	-0.662684	-0.738614	AT1G32220	NAD(P)-binding Rossmann-fold superfamily protein [Source:NCBI gene (formerly Entrezgene);Acc:840114]
	AT5G20140	-1.02279	-0.663131	-0.869425	-0.978175	-0.724831	HBP5	SOUL heme-binding family protein [Source:NCBI gene (formerly Entrezgene);Acc:832136]
	AT4G09010	-0.924759	-0.769371	-0.60997	-0.696631	-0.706885	TL29	ascorbate peroxidase 4 [Source:NCBI gene (formerly Entrezgene);Acc:826480]
	AT1G09350	-4.58659	-3.0736	-3.08774	-3.24658	-3.53377	GolS3	galactinol synthase 3 [Source:NCBI gene (formerly Entrezgene);Acc:837457]
	AT5G63310	-0.942189	-0.730247	-0.818341	-1.13124	-0.779822	NDPK2	nucleoside diphosphate kinase 2 [Source:NCBI gene (formerly Entrezgene);Acc:836451]
	AT4G32770	-1.60821	-0.99927	-1.42321	-1.16723	-1.19035	VTE1	tocopherol cyclase, chloroplast / vitamin E deficient 1 (VTE1) / sucrose export defective 1 (SXD1) [Source:NCBI gene (formerly Entrezgene);Acc:829413]
	AT3G62030	-1.17544	-0.746335	-0.872241	-0.984724	-0.75394	ROC4	rotamase CYP 4 [Source:NCBI gene (formerly Entrezgene);Acc:825376]
	AT5G43750	-1.71761	-1.36569	-1.4186	-1.43994	-1.18046	PnsB5	NAD(P)H dehydrogenase 18 [Source:NCBI gene (formerly Entrezgene);Acc:834396]
	AT3G52960	-0.897934	-0.921336	-1.21468	-0.827121	-0.875918	AT3G52960	Thioredoxin superfamily protein [Source:NCBI gene (formerly Entrezgene);Acc:824462]
	AT5G23310	-0.968086	-0.660739	-1.12029	-1.09877	-0.812128	FSD3	Fe superoxide dismutase 3 [Source:NCBI gene (formerly Entrezgene);Acc:832395]
	AT5G64940	-0.966537	-1.01014	-0.914366	-0.409096	-0.626561	ATH13	ABC2 homolog 13 [Source:NCBI gene (formerly Entrezgene);Acc:836618]
	AT4G25130	-1.01946	-0.816392	-0.81414	-0.845837	-0.597714	PMSR4	peptide met sulfoxide reductase 4 [Source:NCBI gene (formerly Entrezgene);Acc:828616]
	AT5G63980	-1.15827	-0.992441	-0.819737	-1.51478	-0.664478	SAL1	SAL1 phosphatase-like protein [Source:NCBI gene (formerly Entrezgene);Acc:836519]
	AT5G44650	-1.028	-1.11572	-1.0297	-0.756934	-0.545095	CEST	death domain associated protein [Source:NCBI gene (formerly Entrezgene);Acc:834494]
f	AT1G22770	-1.59922	0	0	0	0	GI	gigantea protein (GI) [Source:NCBI gene (formerly Entrezgene);Acc:838883]
	AT5G42380	-1.53749	0	0	0	0	CML37	calmodulin like 37 [Source:NCBI gene (formerly Entrezgene);Acc:834244]
	AT4G11600	-0.666873	0	0	0	0	GPX6	glutathione peroxidase 6 [Source:NCBI gene (formerly Entrezgene);Acc:826765]
	AT1G27730	-1.02375	0	0	0	0	STZ	salt tolerance zinc finger [Source:NCBI gene (formerly Entrezgene);Acc:839666]
	AT5G58070	-0.828341	0	0	0	0	TIL	temperature-induced lipocalin [Source:NCBI gene (formerly Entrezgene);Acc:835919]
	AT1G78380	-0.570641	0	0	0	0	GSTU19	glutathione S-transferase TAU 19 [Source:NCBI gene (formerly Entrezgene);Acc:844174]
	AT3G53990	-0.502299	0	0	0	0	AT3G53990	Adenine nucleotide alpha hydrolases-like superfamily protein [Source:NCBI gene (formerly Entrezgene);Acc:824566]
	AT1G12480	-0.972343	0	0	0	0	OZS1	C4-dicarboxylate transporter/malic acid transport protein [Source:NCBI gene (formerly Entrezgene);Acc:837805]
	AT2G31570	-0.414533	0	0	0	0	GPX2	glutathione peroxidase 2 [Source:NCBI gene (formerly Entrezgene);Acc:817715]
	AT3G47860	-0.380253	0	0	0	0	CHL	chloroplastic lipocalin [Source:NCBI gene (formerly Entrezgene);Acc:823942]
	AT3G56400	-1.38728	0	0	0	0	WRKY70	WRKY DNA-binding protein 70 [Source:NCBI gene (formerly Entrezgene);Acc:824807]
	AT4G09320	-0.604755	0	0	0	0	NDPK1	nucleoside diphosphate kinase [Source:NCBI gene (formerly Entrezgene);Acc:826515]
	AT5G64110	-1.01024	0	0	0	0	AT5G64110	Peroxidase superfamily protein [Source:NCBI gene (formerly Entrezgene);Acc:836532]
	AT5G42980	-0.506737	0	0	0	0	TRX3	thioredoxin 3 [Source:NCBI gene (formerly Entrezgene);Acc:834313]
	AT1G27350	-0.772974	0	0	0	0	AT1G27350	Ribosome associated membrane protein RAMP4 [Source:NCBI gene (formerly Entrezgene);Acc:839624]
	AT5G26030	-0.661186	0	0	0	0	FC1	ferrochelatase 1 [Source:NCBI gene (formerly Entrezgene);Acc:832672]
	AT4G37610	-0.684228	0	0	0	0	BT5	BTB and TAZ domain protein 5 [Source:NCBI gene (formerly Entrezgene);Acc:829915]
	AT2G20270	-0.562788	0	0	0	0	AT2G20270	Thioredoxin superfamily protein [Source:NCBI gene (formerly Entrezgene);Acc:816546]
	AT1G72520	-0.640933	0	0	0	0	LOX4	PLAT/LH2 domain-containing lipoxygenase family protein [Source:NCBI gene (formerly Entrezgene);Acc:843584]
	AT3G10920	-0.496194	0	0	0	0	MSD1	manganese superoxide dismutase 1 [Source:NCBI gene (formerly Entrezgene);Acc:820263]
	AT5G17000	-0.583239	0	0	0	0	AT5G17000	Zinc-binding dehydrogenase family protein [Source:NCBI gene (formerly Entrezgene);Acc:831563]
	AT1G05680	-2.13856	0	0	0	0	UGT74E2	Uridine diphosphate glycosyltransferase 74E2 [Source:NCBI gene (formerly Entrezgene);Acc:837075]
	AT4G35460	-0.881473	0	0	0	0	NTRB	NADPH-dependent thioredoxin reductase B [Source:NCBI gene (formerly Entrezgene);Acc:829698]
	AT4G17040	-0.443062	0	0	0	0	CLPR4	CLP protease R subunit 4 [Source:NCBI gene (formerly Entrezgene);Acc:827412]
	AT4G00860	-0.576453	0	0	0	0	ATOZI1	monopolar spindle protein (DUF1138) [Source:NCBI gene (formerly Entrezgene);Acc:826213]
g	AT5G37770	-0.991682	-0.813798	-0.542105	0	0	TCH2	EF hand calcium-binding protein family [Source:NCBI gene (formerly Entrezgene);Acc:833755]
	AT1G76080	-1.17093	-0.620953	-0.695385	0	0	CDSP32	chloroplastic drought-induced stress protein of 32 kD [Source:NCBI gene (formerly Entrezgene);Acc:843940]
	AT3G25530	-0.850096	-0.450767	-0.428531	0	0	GLYR1	glyoxylate reductase 1 [Source:NCBI gene (formerly Entrezgene);Acc:822139]
	AT2G19310	-1.54624	-1.02281	-0.735314	0	0	AT2G19310	HSP20-like chaperones superfamily protein [Source:NCBI gene (formerly Entrezgene);Acc:816448]
	AT5G57345	-0.944897	-0.536892	-0.405422	0	0	AT5G57345	transmembrane protein [Source:NCBI gene (formerly Entrezgene);Acc:835840]
	AT1G66330	-1.07032	-0.823291	-0.858982	0	0	AT1G66330	senescence-associated family protein [Source:NCBI gene (formerly Entrezgene);Acc:842950]
	AT2G37860	-0.854017	-0.632125	-0.669156	0	0	LCD1	reticulata-like protein, putative (DUF3411) [Source:NCBI gene (formerly Entrezgene);Acc:818362]
	AT2G39460	-0.595825	-0.438447	-0.611954	0	0	RPL23AA	ribosomal protein L23AA [Source:NCBI gene (formerly Entrezgene);Acc:818531]
	AT3G26060	-0.822526	-0.811457	-0.978179	0	0	PRXQ	Thioredoxin superfamily protein [Source:NCBI gene (formerly Entrezgene);Acc:822203]
	AT3G11630	-0.709013	-0.755754	-0.872731	0	0	AT3G11630	Thioredoxin superfamily protein [Source:NCBI gene (formerly Entrezgene);Acc:820335]
	AT2G41680	-0.707193	-0.773589	-0.951543	0	0	NTRC	NADPH-dependent thioredoxin reductase C [Source:NCBI gene (formerly Entrezgene);Acc:818766]
	AT5G13650	-0.589154	-0.667405	-0.861912	0	0	SVR3	elongation factor family protein [Source:NCBI gene (formerly Entrezgene);Acc:831209]
	AT4G08390	-0.58552	-0.761567	-0.68515	0	0	SAPX	stromal ascorbate peroxidase [Source:NCBI gene (formerly Entrezgene);Acc:826396]
	AT5G01820	-0.991161	-1.24497	-1.32312	0	0	SR1	serine/threonine protein kinase 1 [Source:NCBI gene (formerly Entrezgene);Acc:831765]
h	AT5G40390	-0.99784	-0.874661	-1.26996	-1.50188	0	SIP1	Raffinose synthase family protein [Source:NCBI gene (formerly Entrezgene);Acc:834037]
	AT4G35090	-0.56124	-0.448599	-1.03127	-0.380715	0	CAT2	catalase 2 [Source:NCBI gene (formerly Entrezgene);Acc:829661]
	AT5G60890	-0.764127	-1.53991	-1.69816	-1.01847	0	MYB34	myb domain protein 34 [Source:NCBI gene (formerly Entrezgene);Acc:836210]
	AT3G23400	-0.873015	-0.6946	-0.763668	-0.868944	0	FIB4	Plastid-lipid associated protein PAP / fibrillin family protein [Source:NCBI gene (formerly Entrezgene);Acc:821921]
	AT5G12080	-1.02185	-0.748462	-0.843255	-0.964119	0	MSL10	mechanosensitive channel of small conductance-like 10 [Source:NCBI gene (formerly Entrezgene);Acc:831081]
	AT1G03680	-0.638765	-0.378021	-0.415455	-0.651587	0	THM1	thioredoxin M-type 1 [Source:NCBI gene (formerly Entrezgene);Acc:839436]
	AT3G04120	-0.859823	-0.525693	-0.660205	-0.900276	0	GAPC1	glyceraldehyde-3-phosphate dehydrogenase C subunit 1 [Source:NCBI gene (formerly Entrezgene);Acc:819567]
	AT5G28030	-2.29184	-1.97699	-1.3927	-2.23573	0	DES1	L-cysteine desulfhydrase 1 [Source:NCBI gene (formerly Entrezgene);Acc:832873]
	AT3G15360	-1.12294	-0.905126	-0.875946	-0.945272	0	TRX-M4	thioredoxin M-type 4 [Source:NCBI gene (formerly Entrezgene);Acc:820775]
	AT5G21100	-1.34641	-1.12598	-1.03933	-1.17561	0	AT5G21100	Plant L-ascorbate oxidase [Source:NCBI gene (formerly Entrezgene);Acc:832234]
	AT4G12000	-1.46507	-1.5047	-1.1959	-1.98733	0	AT4G12000	SNARE associated Golgi protein family [Source:NCBI gene (formerly Entrezgene);Acc:826807]
i	AT2G34060	-0.978969	0	-1.04456	0	0	AT2G34060	Peroxidase superfamily protein [Source:NCBI gene (formerly Entrezgene);Acc:817967]
	AT1G05690	-0.935758	0	-1.2158	0	0	BT3	BTB and TAZ domain protein 3 [Source:NCBI gene (formerly Entrezgene);Acc:837076]
	AT2G29450	-2.271	0	-1.33703	0	0	GSTU5	glutathione S-transferase tau 5 [Source:NCBI gene (formerly Entrezgene);Acc:817494]
	AT3G17800	-0.592071	0	-0.486177	0	0	AT3G17800	alanine-tRNA ligase, putative (DUF760) [Source:NCBI gene (formerly Entrezgene);Acc:821048]
	AT4G28730	-0.622329	0	-0.541117	0	0	GrxC5	Glutaredoxin family protein [Source:NCBI gene (formerly Entrezgene);Acc:828994]
	AT5G55120	-0.452634	0	-0.406233	0	0	VTC5	GDP-L-galactose phosphorylase VITAMIN C DEFECTIVE 5 (VTC5) [Source:NCBI gene (formerly Entrezgene);Acc:835603]
j	AT5G06290	0	0	-0.621762	0	0	2-Cys Prx B	2-cysteine peroxiredoxin B [Source:NCBI gene (formerly Entrezgene);Acc:830517]
	AT1G59860	0	0	-1.72943	0	0	AT1G59860	HSP20-like chaperones superfamily protein [Source:NCBI gene (formerly Entrezgene);Acc:842280]
	AT2G28190	0	0	-1.20668	0	0	CSD2	copper/zinc superoxide dismutase 2 [Source:NCBI gene (formerly Entrezgene);Acc:817365]
	AT5G25620	0	0	-1.06174	0	0	YUC6	Flavin-binding monooxygenase family protein [Source:NCBI gene (formerly Entrezgene);Acc:832638]
	AT1G18150	0	0	-0.583652	0	0	ATMPK8	Protein kinase superfamily protein [Source:NCBI gene (formerly Entrezgene);Acc:838394]
	AT1G71695	0	0	-0.414532	0	0	AT1G71695	Peroxidase superfamily protein [Source:NCBI gene (formerly Entrezgene);Acc:843498]
	AT4G11280	0	0	-0.521873	0	0	ACS6	1-aminocyclopropane-1-carboxylic acid (acc) synthase 6 [Source:NCBI gene (formerly Entrezgene);Acc:826730]
	AT4G31390	0	0	-0.47153	0	0	ACDO1	Protein kinase superfamily protein [Source:NCBI gene (formerly Entrezgene);Acc:829266]
	AT4G32551	0	0	-0.409727	0	0	LUG	transcriptional corepressor LEUNIG [Source:NCBI gene (formerly Entrezgene);Acc:829390]
k	AT5G27830	0	0	0.740983	0	0	AT5G27830	folate receptor family protein [Source:NCBI gene (formerly Entrezgene);Acc:832845]
	AT4G26070	0	0	0.545263	0	0	MEK1	MAP kinase/ ERK kinase 1 [Source:NCBI gene (formerly Entrezgene);Acc:828713]
	AT5G07470	0	0	0.399426	0	0	PMSR3	peptidemethionine sulfoxide reductase 3 [Source:NCBI gene (formerly Entrezgene);Acc:830638]
	AT1G78410	0	0	2.4808	0	0	AT1G78410	VQ motif-containing protein [Source:NCBI gene (formerly Entrezgene);Acc:844177]
	AT1G19020	0	0	1.23804	0	0	AT1G19020	CDP-diacylglycerol-glycerol-3-phosphate 3-phosphatidyltransferase [Source:NCBI gene (formerly Entrezgene);Acc:838483]
	AT1G61120	0	0	1.27324	0	0	TPS04	terpene synthase 04 [Source:NCBI gene (formerly Entrezgene);Acc:842405]
	AT3G02840	0	0	1.30971	0	0	AT3G02840	ARM repeat superfamily protein [Source:NCBI gene (formerly Entrezgene);Acc:821225]
	AT4G39640	0	0	0.627832	0	0	GGT1	gamma-glutamyl transpeptidase 1 [Source:NCBI gene (formerly Entrezgene);Acc:830118]
	AT4G18880	0	0	0.64747	0	0	HSF A4A	heat shock transcription factor A4A [Source:NCBI gene (formerly Entrezgene);Acc:827622]
	AT4G26965	0	0	0.733848	0	0	AT4G26965	NADH:ubiquinone oxidoreductase, 17.2kDa subunit [Source:NCBI gene (formerly Entrezgene);Acc:828804]
	AT5G59080	0	0	0.979602	0	0	AT5G59080	0
	AT4G23810	0	0	1.13772	0	0	WRKY53	WRKY family transcription factor [Source:NCBI gene (formerly Entrezgene);Acc:828481]
	AT1G15520	0	0	1.75687	0	0	ABCG40	pleiotropic drug resistance 12 [Source:NCBI gene (formerly Entrezgene);Acc:838122]
	AT3G50310	0	0	1.7858	0	0	MAPKKK20	mitogen-activated protein kinase kinase kinase 20 [Source:NCBI gene (formerly Entrezgene);Acc:824193]
	AT5G05300	0	0	2.55444	0	0	AT5G05300	0
l	AT1G52760	0.473345	0.481624	0	0	0	LysoPL2	lysophospholipase 2 [Source:NCBI gene (formerly Entrezgene);Acc:841709]
	AT3G56090	0.674996	0.573785	0	0	0	FER3	ferritin 3 [Source:NCBI gene (formerly Entrezgene);Acc:824775]
	AT4G21830	2.56499	1.55233	0	0	0	MSRB7	methionine sulfoxide reductase B7 [Source:NCBI gene (formerly Entrezgene);Acc:828271]
	AT1G49540	0.775006	0.456854	0	0	0	ELP2	elongator protein 2 [Source:NCBI gene (formerly Entrezgene);Acc:841378]
	AT3G22380	0.730964	0.387915	0	0	0	TIC	time for coffee [Source:NCBI gene (formerly Entrezgene);Acc:821807]
m	AT2G39770	0	0.606514	0.502321	0	0	CYT1	Glucose-1-phosphate adenylyltransferase family protein [Source:NCBI gene (formerly Entrezgene);Acc:818562]
	AT2G22080	0	0.610372	0.590125	0	0	AT2G22080	transmembrane protein [Source:NCBI gene (formerly Entrezgene);Acc:816743]
	AT1G73680	0	0.464513	0.443721	0	0	ALPHA DOX2	alpha dioxygenase [Source:NCBI gene (formerly Entrezgene);Acc:843703]
	AT1G14540	0	2.64722	2.51404	0	0	PER4	Peroxidase superfamily protein [Source:NCBI gene (formerly Entrezgene);Acc:838016]
	AT3G07930	0	0.876499	0.797235	0	0	AT3G07930	DNA glycosylase superfamily protein [Source:NCBI gene (formerly Entrezgene);Acc:819984]
	AT1G01230	0	0.575387	0.591315	0	0	AT1G01230	ORMDL family protein [Source:NCBI gene (formerly Entrezgene);Acc:839331]
	AT5G49570	0	0.457282	0.499395	0	0	PNG1	peptide-N-glycanase 1 [Source:NCBI gene (formerly Entrezgene);Acc:835019]
	AT3G46930	0	0.696957	0.7384	0	0	AT3G46930	Protein kinase superfamily protein [Source:NCBI gene (formerly Entrezgene);Acc:823846]
	AT3G06110	0	0.581703	0.729823	0	0	MKP2	MAPK phosphatase 2 [Source:NCBI gene (formerly Entrezgene);Acc:819784]
	AT1G70520	0	0.735041	0.927946	0	0	CRK2	cysteine-rich RLK (RECEPTOR-like protein kinase) 2 [Source:NCBI gene (formerly Entrezgene);Acc:843389]
	AT4G17490	0	0.84802	1.01029	0	0	ERF6	ethylene responsive element binding factor 6 [Source:NCBI gene (formerly Entrezgene);Acc:827463]
	AT4G23190	0	0.937671	1.07007	0	0	CRK11	cysteine-rich RLK (RECEPTOR-like protein kinase) 11 [Source:NCBI gene (formerly Entrezgene);Acc:828418]
	AT2G40000	0	0.77457	1.16558	0	0	HSPRO2	ortholog of sugar beet HS1 PRO-1 2 [Source:NCBI gene (formerly Entrezgene);Acc:818588]
	AT3G10930	0	0.88471	1.34599	0	0	AT3G10930	0
	AT1G45145	0	0.752566	1.3631	0	0	TRX5	thioredoxin H-type 5 [Source:NCBI gene (formerly Entrezgene);Acc:841082]
n	AT5G52310	-0.971845	0	-1.25883	-2.61861	-1.86673	LTI78	low-temperature-responsive protein 78 (LTI78) / desiccation-responsive protein 29A (RD29A) [Source:NCBI gene (formerly Entrezgene);Acc:835307]
	AT5G47650	-0.697864	0	-0.800135	-0.837379	-0.836939	NUDT2	nudix hydrolase homolog 2 [Source:NCBI gene (formerly Entrezgene);Acc:834816]
	AT3G16670	-1.23672	0	-0.649444	-0.922802	-1.28342	AT3G16670	Pollen Ole e 1 allergen and extensin family protein [Source:NCBI gene (formerly Entrezgene);Acc:820919]
	AT2G16500	-1.15711	0	-0.979962	-0.800787	-0.733565	ADC1	arginine decarboxylase 1 [Source:NCBI gene (formerly Entrezgene);Acc:816149]
o	AT5G36920	0	-1.35485	0	0	0	AT5G36920	transmembrane protein [Source:NCBI gene (formerly Entrezgene);Acc:833660]
	AT2G26150	0	-3.68099	0	0	0	HSFA2	heat shock transcription factor A2 [Source:NCBI gene (formerly Entrezgene);Acc:817155]
	AT3G49110	0	-0.592718	0	0	0	PRXCA	peroxidase CA [Source:NCBI gene (formerly Entrezgene);Acc:824072]
	AT3G08640	0	-0.447213	0	0	0	AT3G08640	alphavirus core family protein (DUF3411) [Source:NCBI gene (formerly Entrezgene);Acc:820011]
	AT5G58390	0	-1.01053	0	0	0	AT5G58390	Peroxidase superfamily protein [Source:NCBI gene (formerly Entrezgene);Acc:835952]
	AT5G59720	0	-0.98728	0	0	0	HSP18.2	heat shock protein 18.2 [Source:NCBI gene (formerly Entrezgene);Acc:836093]
	AT2G38380	0	-0.743831	0	0	0	AT2G38380	Peroxidase superfamily protein [Source:NCBI gene (formerly Entrezgene);Acc:818419]
p	AT5G40370	-0.79653	0	0	-0.525704	0	GRXC2	Glutaredoxin family protein [Source:NCBI gene (formerly Entrezgene);Acc:834035]
	AT5G05410	-0.78266	0	0	-1.09028	0	DREB2A	DRE-binding protein 2A [Source:NCBI gene (formerly Entrezgene);Acc:830424]
	AT5G07460	-0.506957	0	0	-0.83676	0	PMSR2	peptidemethionine sulfoxide reductase 2 [Source:NCBI gene (formerly Entrezgene);Acc:830637]
	AT1G75280	-0.978399	0	0	-0.808105	0	AT1G75280	NmrA-like negative transcriptional regulator family protein [Source:NCBI gene (formerly Entrezgene);Acc:843865]

## Sheet: Cluster-a
GO- and Transcription Factor- Enrichment analyses of Cluster a genes
Root					Log2FC					TF target
Gene ID	Symbol	Description			Col	adc1	OXCuAO3	cdr7/cuao3	OXPtADC	N.S.
AT1G65970	TPX2	Thioredoxin-dependent peroxidase 2			0.943285	1.22482	0.894949	0.870474	1.19174
AT1G73260	KTI1	Kunitz trypsin inhibitor 1			1.51236	1.68088	1.53955	1.47739	1.05238
AT3G17790	PAP17	Purple acid phosphatase 17			1.84559	1.92268	2.15472	0	1.36878
AT4G21830	MSRB7	Methionine sulfoxide reductase B7			1.51007	1.22719	1.13424	0	1.18371
AT4G35770	SEN1	Rhodanese/Cell cycle control phosphatase superfamily protein			1.42526	3.1708	1.83345	1.65228	1.38083
AT5G21940	AT5G21940	Hybrid signal transduction histidine kinase M-like protein			0.858364	1.39012	1.31121	0	0.915825
AT5G63160	BT1	BTB and TAZ domain protein 1			1.27356	1.71989	1.6579	1.35026	1.40643
GO enrichment analysis
GO-BP
Enrichment FDR	nGenes	Biological Process (BP)	Pathway Genes	Fold Enrichment
0.01431	1	GO:0030643 Intracellular phosphate ion homeostasis	4	986.75
0.0309747	1	GO:0000304 Response to singlet oxygen	13	303.615
0.036193	1	GO:0002238 Response to molecule of fungal origin	19	207.737
0.036193	1	GO:0055062 Phosphate ion homeostasis	19	207.737
1.66522e-05	3	GO:0042542 Response to hydrogen peroxide	72	164.458
0.0481758	1	GO:0030091 Protein repair	27	146.185
2.16678e-06	4	GO:0000302 Response to reactive oxygen species	161	98.0621
3.43803e-11	7	GO:0006979 Response to oxidative stress	453	60.9912
0.01431	2	GO:0009751 Response to salicylic acid	183	43.1366
0.016901	2	GO:0009611 Response to wounding	233	33.8798
0.016901	2	GO:0019725 Cellular homeostasis	237	33.308
0.0309747	2	GO:0014070 Response to organic cyclic compound	341	23.1496
0.036193	2	GO:0042592 Homeostatic proc.	405	19.4914
0.000290464	5	GO:1901700 Response to oxygen-containing compound	1675	11.7821
6.58357e-06	7	GO:0042221 Response to chemical	2995	9.22504
2.5665e-05	7	GO:0006950 Response to stress	3912	7.06263
GO-MF
Enrichment FDR	nGenes	Molecular Function (MF)	Pathway Genes	Fold Enrichment
0.0194873	1	GO:0008379 Thioredoxin peroxidase activity	8	493.375
0.0194873	1	GO:0140824 Thioredoxin-dependent peroxiredoxin activity	8	493.375
0.0194873	1	GO:0033743 Peptide-methionine (r)-s-oxide reductase activity	9	438.556
0.0194873	1	GO:0008199 Ferric iron binding	11	358.818
0.0194873	1	GO:0051920 Peroxiredoxin activity	11	358.818
0.0206616	1	GO:0004869 Cysteine-type endopeptidase inhibitor activity	14	281.929
0.022123	1	GO:0008198 Ferrous iron binding	20	197.35
0.0282316	1	GO:0004867 Serine-type endopeptidase inhibitor activity	31	127.323
0.0282316	1	GO:0003993 Acid phosphatase activity	43	91.7907
0.0282316	1	GO:0004866 Endopeptidase inhibitor activity	45	87.7111
0.0282316	1	GO:0016671 Oxidoreductase activity acting on a sulfur group of donors disulfide as acceptor	45	87.7111
0.0282316	1	GO:0030414 Peptidase inhibitor activity	46	85.8043
0.0282316	1	GO:0061135 Endopeptidase regulator activity	46	85.8043
0.0282316	1	GO:0061134 Peptidase regulator activity	48	82.2292
0.022123	3	GO:0016491 Oxidoreductase activity	1478	8.0115
GO-CC
Enrichment FDR	nGenes	Cellular Component (CC)	Pathway Genes	Fold Enrichment
0.0417585	1	GO:0009986 Cell surface	11	358.818
Transcription factor enrichment analysis
TF-AGRIS
Enrichment FDR	nGenes	Transcription Factor Binding Motif	Pathway Genes	Fold Enrichment
NS
Shoot					Log2FC					TF target
Gene ID	Symbol	Description			Col	adc1	OXCuAO3	cdr7/cuao3	OXPtADC	ATBHLH15
AT1G20620	CAT3	Catalase 3			0.959539	0.902185	1.3722	0.605771	0.996133	x
AT1G34370	STOP1	C2H2 and C2HC zinc fingers superfamily protein			1.22001	1.28372	1.17276	1.25004	1.02746
AT1G52200	AT1G52200	PLAC8 family protein			1.86607	2.33984	2.74453	2.47363	1.72384
AT1G73260	KTI1	Kunitz trypsin inhibitor 1			2.28778	1.86034	3.31791	2.12581	1.43152
AT2G37130	AT2G37130	Peroxidase superfamily protein			2.29342	1.55337	2.52115	2.13301	2.35144
AT3G10020	AT3G10020	Plant/protein			1.00945	1.57589	1.88279	1.02209	1.19144	x
AT3G10985	SAG20	Senescence associated 20			1.76292	1.68609	1.77672	1.93776	1.16574
AT3G29035	NAC3	NAC domain containing protein 3			1.44517	1.846	1.8265	1.16057	2.00211
AT3G30775	ERD5	Methylenetetrahydrofolate reductase family protein			1.58913	1.45643	1.21063	1.68695	0.994224	x
AT3G48360	BT2	BTB and TAZ domain protein 2			1.92996	2.37089	2.52786	2.0805	2.18259	x
AT3G57520	SIP2	Seed imbibition 2			1.50706	1.60611	1.49014	1.17578	1.07351	x
AT3G62770	AtATG18a	Transducin/WD40 repeat-like superfamily protein			1.1915	0.630776	1.05388	0.86677	0.824471
AT4G02380	SAG21	Senescence-associated 21			2.19056	2.2603	2.52635	2.49765	1.92948
AT4G12570	UPL5	Ubiquitin protein ligase 5			1.19514	0.981808	1.17949	1.11086	0.68836
AT4G17070	AT4G17070	Peptidyl-prolyl cis-trans isomerase			1.37951	1.35253	1.41319	1.3911	0.813482
AT4G31510	AT4G31510	Major centromere autoantigen B-like protein			0.697508	0.882046	1.22046	0.879826	0.692365
AT4G33420	AT4G33420	Peroxidase superfamily protein			0.556833	1.55079	0.953224	0.769142	0.78718
AT4G35770	SEN1	Rhodanese/Cell cycle control phosphatase superfamily protein			4.67678	3.87745	4.67366	4.67678	4.3551
AT4G37520	AT4G37520	Peroxidase superfamily protein			1.89277	1.28514	1.48803	2.00916	1.46161
AT5G01600	FER1	Ferretin 1			1.38444	1.23486	1.48805	1.17853	1.59266
AT5G20250	DIN10	Raffinose synthase family protein			2.56603	2.64209	2.74494	2.81222	2.38971
AT5G24890	AT5G24890	Stress response NST1-like protein			1.00506	1.18095	1.28005	1.23557	0.930192
AT5G27600	LACS7	Long-chain acyl-CoA synthetase 7			0.715902	0.851645	0.881068	0.749945	0.842304
AT5G39610	NAC6	NAC domain containing protein 6			2.82689	3.18437	3.53368	2.90123	3.3374
AT5G54500	FQR1	Flavodoxin-like quinone reductase 1			0.95093	0.927782	1.02806	0.907755	0.594064
AT5G63160	BT1	BTB and TAZ domain protein 1			2.02481	2.19256	2.29022	2.21361	1.84267
AT5G67480	BT4	BTB and TAZ domain protein 4			1.91528	1.85305	2.2299	1.76047	1.86095	x
GO enrichment analysis
GO-BP
Enrichment FDR	nGenes	Pathways	Pathway Genes	Fold Enrichment
0.00018444	2	GO:0051091 Pos. reg. of dna-binding transcription factor activity	5	409.319
4.26414e-18	10	GO:0042542 Response to hydrogen peroxide	72	142.124
1.41669e-18	12	GO:0000302 Response to reactive oxygen species	161	76.2705
0.000275255	3	GO:1900055 Reg. of leaf senescence	50	61.3978
1.72583e-43	26	GO:0006979 Response to oxidative stress	453	58.7322
6.35e-05	4	GO:0042744 Hydrogen peroxide catabolic proc.	99	41.3453
3.10165e-07	6	GO:0010150 Leaf senescence	150	40.9319
3.56819e-07	6	GO:0090693 Plant organ senescence	157	39.1069
0.000127672	4	GO:0042743 Hydrogen peroxide metabolic proc.	122	33.5507
2.99566e-06	6	GO:0009611 Response to wounding	233	26.351
2.99566e-06	7	GO:0048366 Leaf development	395	18.1344
0.000124932	6	GO:0009651 Response to salt stress	474	12.9531
2.2361e-05	7	GO:0048827 Phyllome development	559	12.8141
0.00018444	6	GO:0044248 Cellular catabolic proc.	524	11.7171
0.000247076	6	GO:0006970 Response to osmotic stress	557	11.0229
2.60441e-10	15	GO:1901700 Response to oxygen-containing compound	1675	9.16385
1.41669e-18	24	GO:0042221 Response to chemical	2995	8.20004
1.92718e-21	27	GO:0006950 Response to stress	3912	7.06263
8.77429e-06	11	GO:0070887 Cellular response to chemical stimulus	1725	6.52537
8.77429e-06	12	GO:0009628 Response to abiotic stimulus	2169	5.66139
GO-MF
Enrichment FDR	nGenes	Pathways	Pathway Genes	Fold Enrichment
0.000388901	2	GO:0047274 Galactinol-sucrose galactosyltransferase activity	5	409.319
0.0282244	1	GO:0004096 Catalase activity	3	341.099
0.0282244	1	GO:0102391 Decanoate-coa ligase activity	3	341.099
0.0304094	1	GO:0004322 Ferroxidase activity	5	204.659
0.0304094	1	GO:0004557 Alpha-galactosidase activity	5	204.659
0.0304094	1	GO:0008753 Nadph dehydrogenase (quinone) activity	5	204.659
0.0304094	1	GO:0016649 Oxidoreductase activity acting on the ch-nh group of donors quinone or similar compound a	5	204.659
0.0304094	1	GO:0016724 Oxidoreductase activity acting on metal ions oxygen as acceptor	5	204.659
0.0304094	1	GO:0052692 Raffinose alpha-galactosidase activity	5	204.659
0.0344478	1	GO:0003955 Nad(p)h dehydrogenase (quinone) activity	6	170.549
0.0112391	2	GO:0008378 Galactosyltransferase activity	44	46.5135
0.000388901	4	GO:0004601 Peroxidase activity	137	29.8773
0.000388901	4	GO:0016684 Oxidoreductase activity acting on peroxide as acceptor	143	28.6237
0.000537199	4	GO:0016209 Antioxidant activity	167	24.5101
0.0212318	3	GO:0005516 Calmodulin binding	249	12.3289
0.00892975	4	GO:0020037 Heme binding	385	10.6316
0.0106989	4	GO:0046906 Tetrapyrrole binding	421	9.72253
0.00892975	7	GO:0016491 Oxidoreductase activity	1478	4.84646
0.0416318	9	GO:0046872 Metal ion binding	3803	2.42168
0.0416318	9	GO:0043169 Cation binding	3826	2.40713
GO-CC
Enrichment FDR	nGenes	Pathways	Pathway Genes	Fold Enrichment
0.043282	6	GO:0005773 Vacuole	1188	5.16816
Transcription factor enrichment analysis
TF-AGRIS
Enrichment FDR	nGenes	Pathways	Pathway Genes	Fold Enrichment
0.01019	6	ATBHLH15 target gene	749	8.1973

## Sheet: Cluster-b
GO- and Transcription Factor- Enrichment analyses of Cluster b genes
Root					Log2FC					TF target
Gene ID	Symbol	Description			Col	adc1	OXCuAO3	cdr7/cuao3	OXPtADC	N.S.
AT1G32230	RCD1	WWE protein-protein interaction domain protein family			0.307765	0	0	0	0
AT1G35580	CINV1	Cytosolic invertase 1			0.276299	0	0	0	0
AT1G52760	LysoPL2	Lysophospholipase 2			0.338804	0	0	0	0
AT1G60740	AT1G60740	Thioredoxin superfamily protein			1.32175	0	0	0	0
AT1G77120	ADH1	Alcohol dehydrogenase 1			0.532095	0	0	0	0
AT3G13610	AT3G13610	2-oxoglutarate (2OG) and Fe(II)-dependent oxygenase superfamily protein			0.643669	0	0	0	0
AT3G57520	SIP2	Seed imbibition 2			0.380727	0	0	0	0
AT4G11850	PLDGAMMA1	Phospholipase D gamma 1			0.29842	0	0	0	0
AT4G12570	UPL5	Ubiquitin protein ligase 5			0.332079	0	0	0	0
AT4G14030	SBP1	Selenium-binding protein 1			0.3139	0	0	0	0
AT5G58940	CRCK1	Calmodulin-binding receptor-like cytoplasmic kinase 1			0.552527	0	0	0	0
AT5G64100	AT5G64100	Peroxidase superfamily protein			0.492418	0	0	0	0
GO enrichment analysis
GO-BP
Enrichment FDR	nGenes	Biological Process (BP)	Pathway Genes	Fold Enrichment
0.000500021	2	GO:0009313 Oligosaccharide catabolic proc.	15	306.989
1.70125e-11	6	GO:0042542 Response to hydrogen peroxide	72	191.868
5.98121e-14	8	GO:0000302 Response to reactive oxygen species	161	114.406
0.00580747	2	GO:0046686 Response to cadmium ion	73	63.0799
7.21787e-20	12	GO:0006979 Response to oxidative stress	453	60.9912
0.0067123	2	GO:0034599 Cellular response to oxidative stress	81	56.8498
0.0067123	2	GO:0009311 Oligosaccharide metabolic proc.	83	55.4799
0.00131214	3	GO:1990748 Cellular detoxification	194	35.6044
0.00131214	3	GO:0097237 Cellular response to toxic substance	195	35.4218
0.00131214	3	GO:0072593 Reactive oxygen species metabolic proc.	199	34.7098
0.00164022	3	GO:0010038 Response to metal ion	220	31.3966
0.0037831	3	GO:0098754 Detoxification	299	23.1012
0.00516895	3	GO:0009636 Response to toxic substance	340	20.3154
0.00123985	4	GO:0044248 Cellular catabolic proc.	524	17.5757
2.6274e-06	8	GO:1901700 Response to oxygen-containing compound	1675	10.9966
0.00736394	4	GO:0033993 Response to lipid	999	9.21889
0.000105095	7	GO:0009056 Catabolic proc.	1836	8.77828
1.14166e-08	11	GO:0042221 Response to chemical	2995	8.45629
0.000960303	6	GO:0070887 Cellular response to chemical stimulus	1725	8.00841
3.53541e-09	12	GO:0006950 Response to stress	3912	7.06263
GO-MF
Enrichment FDR	nGenes	Molecular Function (MF)	Pathway Genes	Fold Enrichment
0.0226845	1	GO:0008430 Selenium binding	3	767.472
0.0226845	1	GO:0004557 Alpha-galactosidase activity	5	460.483
0.0226845	1	GO:0047274 Galactinol-sucrose galactosyltransferase activity	5	460.483
0.0226845	1	GO:0052692 Raffinose alpha-galactosidase activity	5	460.483
0.0226845	1	GO:0008379 Thioredoxin peroxidase activity	8	287.802
0.0226845	1	GO:0140824 Thioredoxin-dependent peroxiredoxin activity	8	287.802
0.0226845	1	GO:0003950 Nad+-protein poly-adp-ribosyltransferase activity	9	255.824
0.0226845	1	GO:0033926 Endo-alpha-n-acetylgalactosaminidase activity	9	255.824
0.0226845	1	GO:0051903 S-(hydroxymethyl)glutathione dehydrogenase [nad(p)+] activity	9	255.824
0.0226845	1	GO:1990404 Nad+-protein adp-ribosyltransferase activity	9	255.824
0.0237177	1	GO:0004575 Sucrose alpha-glucosidase activity	10	230.242
0.0241824	1	GO:0051920 Peroxiredoxin activity	11	209.311
0.0241824	1	GO:0004630 Phospholipase d activity	12	191.868
0.0241824	1	GO:0070290 N-acylphosphatidylethanolamine-specific phospholipase d activity	12	191.868
0.0226845	2	GO:0004620 Phospholipase activity	60	76.7472
0.0226845	2	GO:0016298 Lipase activity	129	35.6964
0.0226845	2	GO:0004601 Peroxidase activity	137	33.6119
0.0226845	2	GO:0016684 Oxidoreductase activity acting on peroxide as acceptor	143	32.2016
0.0226845	2	GO:0016209 Antioxidant activity	167	27.5739
0.0226845	4	GO:0016491 Oxidoreductase activity	1478	6.23117
GO-CC
Enrichment FDR	nGenes	Cellular Component (CC)	Pathway Genes	Fold Enrichment
0.0156109	1	GO:0016363 Nuclear matrix	9	255.824
0.0242257	1	GO:0034399 Nuclear periphery	21	109.639
0.00215558	4	GO:0005911 Cell-cell junction	897	10.2672
0.00215558	4	GO:0009506 Plasmodesma	897	10.2672
0.00215558	4	GO:0070161 Anchoring junction	897	10.2672
0.00215558	4	GO:0055044 Symplast	898	10.2558
0.00215558	4	GO:0030054 Cell junction	900	10.233
0.0157973	5	GO:0005886 Plasma membrane	2804	4.10559
0.0242257	5	GO:0071944 Cell periphery	3232	3.56191
Transcription factor enrichment analysis
TF-AGRIS
Enrichment FDR	nGenes	Transcription Factor Binding Motif	Pathway Genes	Fold Enrichment
NS
Shoot					Log2FC					TF target
Gene ID	Symbol	Description			Col	adc1	OXCuAO3	cdr7/cuao3	OXPtADC	N.S.
AT3G02860	AT3G02860	Zinc ion binding protein			0.565218	0	0	0	0
AT3G08670	AT3G08670	Serine/arginine repetitive matrix-like protein			0.896817	0	0	0	0.734146
AT4G13540	AT4G13540	Golgin family A protein			1.17841	0	0	0	0
AT5G13240	AT5G13240	Transcription regulator			0.563075	0	0	0	0
AT5G41150	UVH1	Restriction endonuclease, type II-like superfamily protein			0.551089	0	0	0	0
AT5G44660	AT5G44660	Uncharacterized protein			0.701159	0	0	0	0
AT5G64100	AT5G64100	Peroxidase superfamily protein			1.44258	0	0	0	0
AT5G66390	AT5G66390	Peroxidase superfamily protein			1.28996	0	0	0	0
GO enrichment analysis
GO-BP
Enrichment FDR	nGenes	Pathways	Pathway Genes	Fold Enrichment
0.0114606	1	GO:0033194 Response to hydroperoxide	3	1151.21
0.0114606	1	GO:0072718 Response to cisplatin	3	1151.21
0.0114606	1	GO:1903427 Neg. reg. of reactive oxygen species biosynthetic proc.	3	1151.21
0.0125526	1	GO:0120194 Reg. of anther dehiscence	4	863.406
0.00382383	2	GO:0042542 Response to hydrogen peroxide	72	95.934
0.000238369	3	GO:0042743 Hydrogen peroxide metabolic proc.	122	84.9252
0.00657169	2	GO:0042744 Hydrogen peroxide catabolic proc.	99	69.7702
1.22711e-05	4	GO:0072593 Reactive oxygen species metabolic proc.	199	69.4196
1.012e-12	8	GO:0006979 Response to oxidative stress	453	60.9912
0.000555855	3	GO:0098869 Cellular oxidant detoxification	176	58.8686
0.000555855	3	GO:1990748 Cellular detoxification	194	53.4066
0.000555855	3	GO:0097237 Cellular response to toxic substance	195	53.1327
0.0114606	2	GO:0000302 Response to reactive oxygen species	161	42.9022
0.00173804	3	GO:0098754 Detoxification	299	34.6518
0.0139475	2	GO:0048609 Multicellular organismal reproductive proc.	205	33.6939
0.00226165	3	GO:0009636 Response to toxic substance	340	30.4732
1.22711e-05	8	GO:0006950 Response to stress	3912	7.06263
0.0108129	5	GO:0042221 Response to chemical	2995	5.76565
0.0114606	5	GO:0051716 Cellular response to stimulus	3266	5.28724
GO-MF
Enrichment FDR	nGenes	Pathways	Pathway Genes	Fold Enrichment
0.0141772	1	GO:0000014 Single-stranded dna endodeoxyribonuclease activity	7	493.375
0.025137	1	GO:0043175 Rna polymerase core enzyme binding	22	156.983
0.025137	1	GO:0004520 Dna endonuclease activity	26	132.832
0.025137	1	GO:0070063 Rna polymerase binding	28	123.344
0.0322536	1	GO:0003684 Damaged dna binding	40	86.3406
0.0322536	1	GO:0004536 Dna nuclease activity	44	78.4915
0.00926662	2	GO:0004601 Peroxidase activity	137	50.4179
0.00926662	2	GO:0016684 Oxidoreductase activity acting on peroxide as acceptor	143	48.3024
0.00926662	2	GO:0016209 Antioxidant activity	167	41.3608
0.025137	2	GO:0020037 Heme binding	385	17.9409
0.025137	2	GO:0046906 Tetrapyrrole binding	421	16.4068
GO-CC
Enrichment FDR	nGenes	Pathways	Pathway Genes	Fold Enrichment
NS
Transcription factor enrichment analysis
TF-AGRIS
Enrichment FDR	nGenes	Pathways	Pathway Genes	Fold Enrichment
NS

## Sheet: Cluster-c
GO- and Transcription Factor- Enrichment analyses of Cluster c genes
Root					Log2FC					TF target
Gene ID	Symbol	Description			Col	adc1	OXCuAO3	cdr7/cuao3	OXPtADC	N.S.
AT1G14870	PCR2	PLANT CADMIUM RESISTANCE 2			0.863636	1.01283	0.637589	0	0
AT3G01420	DOX1	Peroxidase superfamily protein			0.910521	1.19252	0.947792	0	-0.716495
AT4G11170	AT4G11170	Disease resistance protein (TIR-NBS-LRR class) family			1.27083	2.63359	1.584	0	0
AT5G27600	LACS7	Long-chain acyl-CoA synthetase 7			0.475225	0.5746	0.464364	0	0
AT5G44380	AT5G44380	FAD-binding Berberine family protein			0.699952	0.691074	0.722032	0	0
AT5G64120	AT5G64120	Peroxidase superfamily protein			0.344278	0.745967	0.674333	0	0
GO enrichment analysis
GO-BP
Enrichment FDR	nGenes	Biological Process (BP)	Pathway Genes	Fold Enrichment
0.00964907	1	GO:0071732 Cellular response to nitric oxide	4	1151.21
0.0108542	1	GO:0045730 Respiratory burst	5	920.967
0.0118399	1	GO:0071731 Response to nitric oxide	6	767.472
0.0203333	1	GO:1902170 Cellular response to reactive nitrogen species	15	306.989
0.000517226	2	GO:0010193 Response to ozone	33	279.081
0.0263727	1	GO:0006636 Unsaturated fatty acid biosynthetic proc.	27	170.549
0.0019403	2	GO:0001676 Long-chain fatty acid metabolic proc.	71	129.714
0.000191732	3	GO:0000302 Response to reactive oxygen species	161	85.8043
1.88016e-09	6	GO:0006979 Response to oxidative stress	453	60.9912
0.00912054	2	GO:0098869 Cellular oxidant detoxification	176	52.3277
0.00912054	2	GO:1990748 Cellular detoxification	194	47.4725
0.00912054	2	GO:0097237 Cellular response to toxic substance	195	47.2291
0.0129676	2	GO:0098754 Detoxification	299	30.8016
0.0129676	2	GO:0006631 Fatty acid metabolic proc.	309	29.8047
0.0146136	2	GO:0009636 Response to toxic substance	340	27.0873
0.0263727	2	GO:0032787 Monocarboxylic acid metabolic proc.	533	17.2789
0.0227059	3	GO:1901700 Response to oxygen-containing compound	1675	8.24746
0.0227059	3	GO:0006952 Defense response	1707	8.09285
0.000267701	6	GO:0006950 Response to stress	3912	7.06263
0.0129676	4	GO:0042221 Response to chemical	2995	6.15003
GO-MF
Enrichment FDR	nGenes	Molecular Function (MF)	Pathway Genes	Fold Enrichment
0.0068394	1	GO:0102391 Decanoate-coa ligase activity	3	1534.94
0.0146969	1	GO:0031956 Medium-chain fatty acid-coa ligase activity	9	511.648
0.0146969	1	GO:0004467 Long-chain fatty acid-coa ligase activity	12	383.736
0.0165549	1	GO:0120515 Fatty acid-coa ligase activity	19	242.36
0.0165549	1	GO:0015645 Fatty acid ligase activity	20	230.242
0.0165871	1	GO:0003953 Nad+ nucleosidase activity	30	153.494
0.0165871	1	GO:0016405 Coa-ligase activity	30	153.494
0.0165871	1	GO:0016878 Acid-thiol ligase activity	30	153.494
0.0165871	1	GO:0050135 Nadp+ nucleosidase activity	30	153.494
0.0165871	1	GO:0061809 Nad+ nucleotidase cyclic adp-ribose generating	30	153.494
0.0165871	1	GO:0016702 Oxidoreductase activity acting on single donors with incorporation of molecular oxygen in	31	148.543
0.0243718	1	GO:0016877 Ligase activity forming carbon-sulfur bonds	51	90.2908
0.0068394	2	GO:0004601 Peroxidase activity	137	67.2238
0.0068394	2	GO:0016684 Oxidoreductase activity acting on peroxide as acceptor	143	64.4033
0.0326248	1	GO:0016799 Hydrolase activity hydrolyzing n-glycosyl compounds	72	63.956
0.0068394	2	GO:0016209 Antioxidant activity	167	55.1477
0.0146969	2	GO:0020037 Heme binding	385	23.9212
0.0155702	2	GO:0046906 Tetrapyrrole binding	421	21.8757
0.0146969	3	GO:0016491 Oxidoreductase activity	1478	9.34675
GO-CC
Enrichment FDR	nGenes	Cellular Component (CC)	Pathway Genes	Fold Enrichment
NS
Transcription factor enrichment analysis
TF-AGRIS
Enrichment FDR	nGenes	Transcription Factor Binding Motif	Pathway Genes	Fold Enrichment
NS
Shoot					Log2FC					TF target
Gene ID	Symbol	Description			Col	adc1	OXCuAO3	cdr7/cuao3	OXPtADC	N.S.
AT1G02930	GSTF6	Glutathione S-transferase 6			0.8601	0.947649	1.21045	0	0
AT3G05970	LACS6	Long-chain acyl-CoA synthetase 6			0.446896	0	0.394979	0	0
AT3G21650	AT3G21650	Protein phosphatase 2A regulatory B subunit family protein			0.616177	0	0.537856	0	0
AT3G49120	PRXCB	Peroxidase CB			0.486394	0	0.668664	0	0
AT4G08770	Prx37	Peroxidase superfamily protein			1.68692	0.894964	1.40168	0	0
AT4G08920	CRY1	Cryptochrome 1			0.384196	0.441159	0.67171	0	0
AT4G30170	AT4G30170	Peroxidase family protein			1.25209	0.892533	1.20631	0	0
AT5G16470	AT5G16470	Zinc finger (C2H2 type) family protein			0.441147	0.57451	0.61242	0	0
AT5G44380	AT5G44380	FAD-binding Berberine family protein			1.53516	0.883431	1.21005	0	0
AT5G54810	TSB1	Tryptophan synthase beta-subunit 1			0.477527	0.390202	0.705494	0	0
GO enrichment analysis
GO-BP
Enrichment FDR	nGenes	Pathways	Pathway Genes	Fold Enrichment
0.000164403	2	GO:0071452 Cellular response to singlet oxygen	8	690.725
0.000288275	2	GO:0000304 Response to singlet oxygen	13	425.062
0.000288275	2	GO:0080183 Response to photooxidative stress	13	425.062
0.00136101	2	GO:0034614 Cellular response to reactive oxygen species	37	149.346
8.65991e-06	4	GO:0042743 Hydrogen peroxide metabolic proc.	122	90.5869
0.000203901	3	GO:0042744 Hydrogen peroxide catabolic proc.	99	83.7242
4.44034e-16	10	GO:0006979 Response to oxidative stress	453	60.9912
4.62498e-05	4	GO:0072593 Reactive oxygen species metabolic proc.	199	55.5357
0.000607155	3	GO:0000302 Response to reactive oxygen species	161	51.4826
0.000686543	3	GO:0098869 Cellular oxidant detoxification	176	47.0949
0.000822301	3	GO:1990748 Cellular detoxification	194	42.7253
0.000822301	3	GO:0097237 Cellular response to toxic substance	195	42.5062
0.000866309	3	GO:0002831 Reg. of response to biotic stimulus	206	40.2364
0.000156	4	GO:0098754 Detoxification	299	36.9619
0.000194697	4	GO:0009636 Response to toxic substance	340	32.5047
0.000611525	4	GO:0044248 Cellular catabolic proc.	524	21.0908
0.000288275	6	GO:0070887 Cellular response to chemical stimulus	1725	9.61009
4.85258e-05	8	GO:0042221 Response to chemical	2995	7.38003
5.59551e-07	10	GO:0006950 Response to stress	3912	7.06263
GO-MF
Enrichment FDR	nGenes	Pathways	Pathway Genes	Fold Enrichment
0.0143211	1	GO:0004834 Tryptophan synthase activity	6	460.483
0.0143211	1	GO:0009882 Blue light photoreceptor activity	6	460.483
0.0260129	1	GO:0004467 Long-chain fatty acid-coa ligase activity	12	230.242
0.0280166	1	GO:0043295 Glutathione binding	19	145.416
0.0280166	1	GO:0120515 Fatty acid-coa ligase activity	19	145.416
0.0280166	1	GO:1900750 Oligopeptide binding	19	145.416
0.0280166	1	GO:0015645 Fatty acid ligase activity	20	138.145
0.0290967	1	GO:0009881 Photoreceptor activity	22	125.586
0.0338026	1	GO:0072341 Modified amino acid binding	27	102.33
0.0339649	1	GO:0016405 Coa-ligase activity	30	92.0967
0.00428206	2	GO:0071949 Fad binding	80	69.0725
0.000523506	3	GO:0004601 Peroxidase activity	137	60.5015
0.000523506	3	GO:0016684 Oxidoreductase activity acting on peroxide as acceptor	143	57.9629
0.000555021	3	GO:0016209 Antioxidant activity	167	49.6329
0.0127529	2	GO:0050660 Flavin adenine dinucleotide binding	165	33.4897
0.00428206	3	GO:0020037 Heme binding	385	21.5291
0.00428206	3	GO:0046906 Tetrapyrrole binding	421	19.6881
0.0124479	4	GO:0016491 Oxidoreductase activity	1478	7.4774
0.0280166	5	GO:0046872 Metal ion binding	3803	3.63253
0.0280166	5	GO:0043169 Cation binding	3826	3.61069
GO-CC
Enrichment FDR	nGenes	Pathways	Pathway Genes	Fold Enrichment
0.0191702	1	GO:0046861 Glyoxysomal membrane	4	690.725
0.0191702	1	GO:0016605 Pml body	5	552.58
0.0355555	1	GO:0009514 Glyoxysome	13	212.531
0.0449815	1	GO:0000159 Protein phosphatase type 2a complex	23	120.126
0.0449815	1	GO:0010494 Cytoplasmic stress granule	29	95.2724
0.0449815	1	GO:0008287 Protein serine/threonine phosphatase complex	33	83.7242
0.0449815	1	GO:1903293 Phosphatase complex	33	83.7242
0.0449815	2	GO:0009505 Plant-type cell wall	386	14.3155
0.0449815	2	GO:0005618 Cell wall	421	13.1254
0.0449815	2	GO:0030312 External encapsulating structure	450	12.2796
0.0234537	3	GO:0000325 Plant-type vacuole	818	10.1329
0.0153672	4	GO:0005773 Vacuole	1188	9.30269
0.0143595	5	GO:0005576 Extracellular region	1876	7.36381
0.0191702	5	GO:0005829 Cytosol	2784	4.9621
Transcription factor enrichment analysis
TF-AGRIS
Enrichment FDR	nGenes	Pathways	Pathway Genes	Fold Enrichment
NS	N.S

## Sheet: Cluster-d
GO- and Transcription Factor- Enrichment analyses of Cluster d genes
Root					Log2FC					TF target
Gene ID	Symbol	Description			Col	adc1	OXCuAO3	cdr7/cuao3	OXPtADC	N.S.
AT3G10985	SAG20	Senescence associated 20			0.37248	0.604671	0.591758	0.605074	0
AT3G30775	ERD5	Methylenetetrahydrofolate reductase family protein			0	0.56469	0.717196	0.950869	0
AT4G37520	AT4G37520	Peroxidase superfamily protein			1.02766	1.1185	1.10152	1.24936	0
AT5G20250	DIN10	Raffinose synthase family protein			1.03793	1.38701	1.26544	1.41241	0
AT5G56550	OXS3	Oxidative stress 3			1.77725	1.8332	2.36253	1.53686	0
GO enrichment analysis
GO-BP
Enrichment FDR	nGenes	Biological Process (BP)	Pathway Genes	Fold Enrichment
0.00860837	1	GO:0006562 Proline catabolic proc.	3	1841.93
0.00860837	1	GO:0010133 Proline catabolic proc. to glutamate	3	1841.93
0.0170139	1	GO:0006560 Proline metabolic proc.	16	345.363
0.0172115	1	GO:0009065 Glutamine family amino acid catabolic proc.	18	306.989
0.0172115	1	GO:0002238 Response to molecule of fungal origin	19	290.832
1.15932e-07	5	GO:0006979 Response to oxidative stress	453	60.9912
0.00860837	2	GO:0071456 Cellular response to hypoxia	240	46.0483
0.00860837	2	GO:0036294 Cellular response to decreased oxygen levels	242	45.6678
0.00860837	2	GO:0001666 Response to hypoxia	267	41.3918
0.00860837	2	GO:0036293 Response to decreased oxygen levels	271	40.7808
0.015546	2	GO:0009414 Response to water deprivation	418	26.4392
0.015546	2	GO:0009415 Response to water	429	25.7613
0.0166501	2	GO:0001101 Response to acid chemical	459	24.0776
0.0172115	2	GO:0044248 Cellular catabolic proc.	524	21.0908
0.015546	3	GO:1901700 Response to oxygen-containing compound	1675	9.89696
0.015546	3	GO:0070887 Cellular response to chemical stimulus	1725	9.61009
0.000746165	5	GO:0042221 Response to chemical	2995	9.22504
0.00189275	5	GO:0006950 Response to stress	3912	7.06263
GO-MF
Enrichment FDR	nGenes	Molecular Function (MF)	Pathway Genes	Fold Enrichment
0.010855	1	GO:0016649 Oxidoreductase activity acting on the ch-nh group of donors quinone or similar compound a	5	1105.16
0.010855	1	GO:0047274 Galactinol-sucrose galactosyltransferase activity	5	1105.16
0.044783	1	GO:0016645 Oxidoreductase activity acting on the ch-nh group of donors	31	178.252
0.0476274	1	GO:0008378 Galactosyltransferase activity	44	125.586
GO-CC
Enrichment FDR	nGenes	Cellular Component (CC)	Pathway Genes	Fold Enrichment
NS
Transcription factor enrichment analysis
TF-AGRIS
Enrichment FDR	nGenes	Transcription Factor Binding Motif	Pathway Genes	Fold Enrichment
NS
Shoot					Log2FC					TF target
Gene ID	Symbol	Description			Col	adc1	OXCuAO3	cdr7/cuao3	OXPtADC	N.S.
AT1G03850	GRXS13	Glutaredoxin family protein			1.75342	1.79971	2.23377	1.52598	0
AT1G07530	SCL14	SCARECROW-like 14			0.590837	0.553014	0.776592	0.714186	0
AT1G09970	LRR XI-23	Leucine-rich receptor-like protein kinase family protein			0.794763	0.77732	0.891105	0.813788	0
AT1G14870	PCR2	PLANT CADMIUM RESISTANCE 2			1.39386	1.91488	2.14429	1.4424	0
AT1G15380	GLYI4	Lactoylglutathione lyase / glyoxalase I family protein			1.23081	1.14533	1.29319	1.33001	0
AT1G32230	RCD1	WWE protein-protein interaction domain protein family			0.666983	0.385394	0.426763	0.412318	0
AT1G35580	CINV1	Cytosolic invertase 1			1.13595	1.0003	0.756681	1.16442	0
AT1G65970	TPX2	Thioredoxin-dependent peroxidase 2			2.00524	1.45508	1.76246	1.89783	0
AT2G19810	OZF1	CCCH-type zinc finger family protein			1.18757	1.88959	1.65415	1.03583	0
AT2G23140	PUB4	RING/U-box superfamily protein with ARM repeat domain-containing protein			0.633303	0.695045	0.465569	0.525821	0
AT2G43790	MPK6	MAP kinase 6			0.746023	0.5545	0.469723	0.445561	0
AT3G20340	AT3G20340	Protein expression protein			2.36617	2.38474	2.61282	2.00348	0
AT4G11850	PLDGAMMA1	Phospholipase D gamma 1			0.550036	0.763126	1.13249	0.593036	0
AT4G24520	ATR1	P450 reductase 1			0.578397	0.453462	0.615961	0.620319	0
AT4G34890	XDH1	Xanthine dehydrogenase 1			0.800282	0.496335	0.479695	0.677212	0
AT5G03280	EIN2	NRAMP metal ion transporter family protein			0.495792	0.50099	0.501368	0.386952	0
AT5G20230	BCB	Blue-copper-binding protein			1.80014	2.29152	2.86067	1.84133	0.963234
AT5G56550	OXS3	Oxidative stress 3			1.77432	2.14623	2.39279	1.92172	0
GO enrichment analysis
GO-BP
Enrichment FDR	nGenes	Pathways	Pathway Genes	Fold Enrichment
0.000936143	2	GO:0080183 Response to photooxidative stress	13	236.145
2.65171e-27	17	GO:0006979 Response to oxidative stress	453	57.6028
5.73603e-06	5	GO:0000302 Response to reactive oxygen species	161	47.6691
0.00158813	3	GO:0009867 Jasmonic acid mediated signaling pathway	123	37.4377
0.00169847	3	GO:0071395 Cellular response to jasmonic acid stimulus	128	35.9753
0.000175344	5	GO:0140546 Defense response to symbiont	379	20.2499
0.000285855	5	GO:0001101 Response to acid chemical	459	16.7205
0.000960946	5	GO:0048364 Root development	614	12.4995
0.000960946	5	GO:0022622 Root system development	615	12.4792
0.000190964	7	GO:0098542 Defense response to other organism	1185	9.06718
0.00012128	8	GO:0043207 Response to external biotic stimulus	1489	8.24685
0.00012128	8	GO:0051707 Response to other organism	1489	8.24685
0.00012128	8	GO:0044419 Biological proc. involved in interspecies interaction between organisms	1510	8.13216
0.000190964	8	GO:1901700 Response to oxygen-containing compound	1675	7.33108
0.000190964	8	GO:0006952 Defense response	1707	7.19365
1.14064e-13	18	GO:0006950 Response to stress	3912	7.06263
2.11873e-07	13	GO:0042221 Response to chemical	2995	6.66253
0.00157973	7	GO:0070887 Cellular response to chemical stimulus	1725	6.22876
GO-MF
Enrichment FDR	nGenes	Pathways	Pathway Genes	Fold Enrichment
0.049957	1	GO:0003958 Nadph-hemoprotein reductase activity	4	383.736
0.049957	1	GO:0016653 Oxidoreductase activity acting on nad(p)h heme protein as acceptor	7	219.278
0.049957	1	GO:0008379 Thioredoxin peroxidase activity	8	191.868
0.049957	1	GO:0016725 Oxidoreductase activity acting on ch or ch2 groups	8	191.868
0.049957	1	GO:0140824 Thioredoxin-dependent peroxiredoxin activity	8	191.868
0.049957	1	GO:0003950 Nad+-protein poly-adp-ribosyltransferase activity	9	170.549
0.049957	1	GO:0033926 Endo-alpha-n-acetylgalactosaminidase activity	9	170.549
0.049957	1	GO:1990404 Nad+-protein adp-ribosyltransferase activity	9	170.549
0.049957	1	GO:0004575 Sucrose alpha-glucosidase activity	10	153.494
0.049957	1	GO:0051920 Peroxiredoxin activity	11	139.54
0.049957	1	GO:0004630 Phospholipase d activity	12	127.912
0.049957	1	GO:0015086 Cadmium ion transmembrane transporter activity	12	127.912
0.049957	1	GO:0070290 N-acylphosphatidylethanolamine-specific phospholipase d activity	12	127.912
0.049957	2	GO:0051537 2 iron 2 sulfur cluster binding	65	47.2291
0.049957	2	GO:0050660 Flavin adenine dinucleotide binding	165	18.6054
0.049957	2	GO:0051536 Iron-sulfur cluster binding	169	18.165
0.049957	2	GO:0051540 Metal cluster binding	169	18.165
GO-CC
Enrichment FDR	nGenes	Pathways	Pathway Genes	Fold Enrichment
0.0210224	7	GO:0005886 Plasma membrane	2804	3.83189
0.016933	8	GO:0071944 Cell periphery	3232	3.79937
Transcription factor enrichment analysis
TF-AGRIS
Enrichment FDR	nGenes	Pathways	Pathway Genes	Fold Enrichment
NS

## Sheet: Cluster-e
GO- and Transcription Factor- Enrichment analyses of Cluster e genes
Root					Log2FC					TF target
Gene ID	Symbol	Description			Col	adc1	OXCuAO3	cdr7/cuao3	OXPtADC	N.S.
AT5G58070	TIL	Temperature-induced lipocalin			-0.984625	-0.590121	-0.532809	-0.701718	-0.551343
AT5G64940	ATH13	ABC2 homolog 13			-1.28322	-0.815891	-1.0662	-1.20107	-0.720355
GO enrichment analysis
GO-BP
Enrichment FDR	nGenes	Biological Process (BP)	Pathway Genes	Fold Enrichment
0.00299186	1	GO:1901031 Reg. of response to reactive oxygen species	3	4604.83
0.00299186	1	GO:0006883 Intracellular sodium ion homeostasis	4	3453.62
0.00299186	1	GO:0055081 Monoatomic anion homeostasis	4	3453.62
8.77204e-06	2	GO:1902882 Reg. of response to oxidative stress	9	3069.89
0.0030598	1	GO:1901562 Response to paraquat	5	2762.9
0.0030598	1	GO:1902884 Pos. reg. of response to oxidative stress	5	2762.9
0.00504831	1	GO:0055078 Sodium ion homeostasis	9	1534.94
0.00588916	1	GO:1990641 Response to iron ion starvation	14	986.75
0.00913389	1	GO:0050826 Response to freezing	26	531.327
0.000230388	2	GO:0009644 Response to high light intensity	62	445.629
0.000784611	2	GO:0000302 Response to reactive oxygen species	161	171.609
0.00299186	2	GO:0006979 Response to oxidative stress	453	60.9912
0.00512702	2	GO:0009416 Response to light stimulus	772	35.7889
0.00512702	2	GO:0048583 Reg. of response to stimulus	785	35.1962
0.00512702	2	GO:0009314 Response to radiation	795	34.7535
0.00913389	2	GO:0006629 Lipid metabolic proc.	1174	23.5341
0.00913389	2	GO:0033554 Cellular response to stress	1225	22.5543
GO-MF
Enrichment FDR	nGenes	Molecular Function (MF)	Pathway Genes	Fold Enrichment
0.0429781	1	GO:0045735 Nutrient reservoir activity	27	511.648
GO-CC
Enrichment FDR	nGenes	Cellular Component (CC)	Pathway Genes	Fold Enrichment
0.00894907	1	GO:0009898 Cytoplasmic side of plasma membrane	29	476.362
0.00894907	1	GO:0098552 Side of membrane	38	363.539
0.00276386	2	GO:0031969 Chloroplast membrane	291	94.945
0.00535698	2	GO:0042170 Plastid membrane	682	40.5117
0.00535698	2	GO:0009941 Chloroplast envelope	701	39.4137
0.00809795	2	GO:0009526 Plastid envelope	995	27.7678
0.00894907	2	GO:0031967 Organelle envelope	1479	18.6809
0.0204285	2	GO:0009507 Chloroplast	2403	11.4977
0.0204285	2	GO:0031090 Organelle membrane	2498	11.0604
0.025204	2	GO:0009536 Plastid	2910	9.4945
Transcription factor enrichment analysis
TF-AGRIS
Enrichment FDR	nGenes	Transcription Factor Binding Motif	Pathway Genes	Fold Enrichment
NS
Shoot					Log2FC					TF target
Gene ID	Symbol	Description			Col	adc1	OXCuAO3	cdr7/cuao3	OXPtADC	N.S.
AT1G09350	GolS3	Galactinol synthase 3			-4.58659	-3.0736	-3.08774	-3.24658	-3.53377
AT1G32220	AT1G32220	NAD(P)-binding Rossmann-fold superfamily protein			-1.10134	-0.589126	-0.857664	-0.662684	-0.738614
AT1G54050	AT1G54050	HSP20-like chaperones superfamily protein			-1.56263	-1.56044	-1.21066	-2.04272	-1.68799
AT2G37040	PAL1	PHE ammonia lyase 1			-0.923904	-0.776808	-1.29646	-0.690232	-1.21525
AT3G52960	AT3G52960	Thioredoxin superfamily protein			-0.897934	-0.921336	-1.21468	-0.827121	-0.875918
AT3G53260	PAL2	Phenylalanine ammonia-lyase 2			-0.639166	-0.481372	-0.563625	-0.424987	-0.69084
AT3G62030	ROC4	Rotamase CYP 4			-1.17544	-0.746335	-0.872241	-0.984724	-0.75394
AT4G09010	TL29	Ascorbate peroxidase 4			-0.924759	-0.769371	-0.60997	-0.696631	-0.706885
AT4G25130	PMSR4	Peptide met sulfoxide reductase 4			-1.01946	-0.816392	-0.81414	-0.845837	-0.597714
AT4G32770	VTE1	Tocopherol cyclase, chloroplast / vitamin E deficient 1 (VTE1) / sucrose export defective 1 (SXD1)			-1.60821	-0.99927	-1.42321	-1.16723	-1.19035
AT5G13930	TT4	Chalcone and stilbene synthase family protein			-1.48958	-1.35767	-2.22942	-1.64781	-2.08953
AT5G20140	HBP5	SOUL heme-binding family protein			-1.02279	-0.663131	-0.869425	-0.978175	-0.724831
AT5G23310	FSD3	Fe superoxide dismutase 3			-0.968086	-0.660739	-1.12029	-1.09877	-0.812128
AT5G43750	PnsB5	NAD(P)H dehydrogenase 18			-1.71761	-1.36569	-1.4186	-1.43994	-1.18046
AT5G44650	CEST	Death domain associated protein			-1.028	-1.11572	-1.0297	-0.756934	-0.545095
AT5G63310	NDPK2	Nucleoside diphosphate kinase 2			-0.942189	-0.730247	-0.818341	-1.13124	-0.779822
AT5G63980	SAL1	SAL1 phosphatase-like protein			-1.15827	-0.992441	-0.819737	-1.51478	-0.664478
AT5G64940	ATH13	ABC2 homolog 13			-0.966537	-1.01014	-0.914366	-0.409096	-0.626561
GO enrichment analysis
GO-BP
Enrichment FDR	nGenes	Pathways	Pathway Genes	Fold Enrichment
0.000115027	2	GO:0009800 Cinnamic acid biosynthetic proc.	5	613.978
0.000145939	2	GO:0009803 Cinnamic acid metabolic proc.	6	511.648
0.000555226	2	GO:0006559 L-phenylalanine catabolic proc.	12	255.824
0.000614927	2	GO:1902222 Erythrose 4-phosphate/phosphoenolpyruvate family amino acid catabolic proc.	13	236.145
0.00130074	2	GO:0009074 Aromatic amino acid family catabolic proc.	21	146.185
1.67343e-07	5	GO:0034599 Cellular response to oxidative stress	81	94.7497
0.000303867	3	GO:0042542 Response to hydrogen peroxide	72	63.956
1.15289e-06	5	GO:0062197 Cellular response to chemical stress	129	59.494
1.85796e-27	17	GO:0006979 Response to oxidative stress	453	57.6028
2.29659e-06	5	GO:0000302 Response to reactive oxygen species	161	47.6691
0.000966139	3	GO:0009411 Response to uv	113	40.7507
1.10528e-05	7	GO:0009416 Response to light stimulus	772	13.9179
1.2127e-05	7	GO:0009314 Response to radiation	795	13.5152
1.15289e-06	10	GO:1901700 Response to oxygen-containing compound	1675	9.16385
0.00130074	6	GO:0033554 Cellular response to stress	1225	7.5181
0.000145939	8	GO:0070887 Cellular response to chemical stimulus	1725	7.11858
8.37033e-06	10	GO:0009628 Response to abiotic stimulus	2169	7.07674
8.83949e-12	17	GO:0006950 Response to stress	3912	6.67026
1.34528e-06	12	GO:0042221 Response to chemical	2995	6.15003
0.00124902	7	GO:0044281 Small molecule metabolic proc.	1758	6.11184
GO-MF
Enrichment FDR	nGenes	Pathways	Pathway Genes	Fold Enrichment
0.00017785	2	GO:0045548 Phenylalanine ammonia-lyase activity	4	767.472
0.000222141	2	GO:0016841 Ammonia-lyase activity	6	511.648
0.0240681	1	GO:0004441 Inositol-1,4-bisphosphate 1-phosphatase activity	4	383.736
0.0240681	1	GO:0016312 Inositol bisphosphate phosphatase activity	4	383.736
0.0240681	1	GO:0008113 Peptide-methionine (s)-s-oxide reductase activity	5	306.989
0.0240681	1	GO:0033744 L-methionine:thioredoxin-disulfide s-oxidoreductase activity	5	306.989
0.0240681	1	GO:0036456 L-methionine-(s)-s-oxide reductase activity	5	306.989
0.0240681	1	GO:0008441 3-prime(2),5-prime-bisphosphate nucleotidase activity	6	255.824
0.0256568	1	GO:0008379 Thioredoxin peroxidase activity	8	191.868
0.0256568	1	GO:0047216 Inositol 3-alpha-galactosyltransferase activity	8	191.868
0.0256568	1	GO:0140824 Thioredoxin-dependent peroxiredoxin activity	8	191.868
0.0267094	1	GO:0004550 Nucleoside diphosphate kinase activity	9	170.549
0.00186575	2	GO:0016840 Carbon-nitrogen lyase activity	20	153.494
0.0267094	1	GO:0004784 Superoxide dismutase activity	10	153.494
0.0267094	1	GO:0016721 Oxidoreductase activity acting on superoxide radicals as acceptor	10	153.494
0.0278255	1	GO:0051920 Peroxiredoxin activity	11	139.54
0.0336125	1	GO:0008252 Nucleotidase activity	14	109.639
0.00306273	3	GO:0016209 Antioxidant activity	167	27.5739
0.0240681	2	GO:0004601 Peroxidase activity	137	22.4079
0.0240681	2	GO:0016684 Oxidoreductase activity acting on peroxide as acceptor	143	21.4678
GO-CC
Enrichment FDR	nGenes	Pathways	Pathway Genes	Fold Enrichment
3.79057e-11	10	GO:0009579 Thylakoid	601	25.5398
1.26142e-07	7	GO:0009534 Chloroplast thylakoid	520	20.6627
1.26142e-07	7	GO:0031976 Plastid thylakoid	522	20.5835
1.8738e-05	5	GO:0009535 Chloroplast thylakoid membrane	423	18.1436
1.8738e-05	5	GO:0055035 Plastid thylakoid membrane	425	18.0582
5.30714e-08	8	GO:0009941 Chloroplast envelope	701	17.5172
2.06656e-05	5	GO:0042651 Thylakoid membrane	444	17.2854
2.06656e-05	5	GO:0034357 Photosynthetic membrane	445	17.2466
6.9507e-07	7	GO:0042170 Plastid membrane	682	15.7546
2.71618e-09	10	GO:0009526 Plastid envelope	995	15.4266
1.33961e-06	7	GO:0009570 Chloroplast stroma	767	14.0086
5.18274e-05	5	GO:0019867 Outer membrane	551	13.9287
5.18274e-05	5	GO:0031968 Organelle outer membrane	551	13.9287
1.33961e-06	7	GO:0009532 Plastid stroma	774	13.8819
5.30714e-08	10	GO:0031967 Organelle envelope	1479	10.3783
3.15719e-08	12	GO:0009507 Chloroplast	2403	7.66514
1.26142e-07	12	GO:0009536 Plastid	2910	6.32967
3.40522e-06	10	GO:0043228 Non-membrane-bounded organelle	2550	6.01939
3.40522e-06	10	GO:0043232 Intracellular non-membrane-bounded organelle	2550	6.01939
0.000193773	8	GO:0031090 Organelle membrane	2498	4.91575
Transcription factor enrichment analysis
TF-AGRIS
Enrichment FDR	nGenes	Pathways	Pathway Genes	Fold Enrichment
NS

## Sheet: Cluster-f
GO- and Transcription Factor- Enrichment analyses of Cluster f genes
Root					Log2FC					TF target
Gene ID	Symbol	Description			Col	adc1	OXCuAO3	cdr7/cuao3	OXPtADC	N.S.
AT1G27730	STZ	Salt tolerance zinc finger			-1.23227	0	0	0	0
AT1G44970	AT1G44970	Peroxidase superfamily protein			-0.562692	0	0	0	0
AT1G53670	MSRB1	Methionine sulfoxide reductase B 1			-0.576984	0	0	0	0
AT1G66330	AT1G66330	Senescence-associated family protein			-0.414178	0	0	0	0
AT1G68850	AT1G68850	Peroxidase superfamily protein			-0.417972	0	0	0	0
AT1G76080	CDSP32	Chloroplastic drought-induced stress protein of 32 kD			-0.910229	0	0	0	0
AT1G79600	AT1G79600	Protein kinase superfamily protein			-0.463242	0	0	0	0
AT2G34060	AT2G34060	Peroxidase superfamily protein			-0.897982	0	0	0	0
AT2G38380	AT2G38380	Peroxidase superfamily protein			-0.547125	0	0	0	0
AT2G39800	P5CS1	Delta1-pyrroline-5-carboxylate synthase 1			-0.608471	0	0	0	0
AT2G40000	HSPRO2	Ortholog of sugar beet HS1 PRO-1 2			-0.906802	0	0	0	0
AT3G02840	AT3G02840	ARM repeat superfamily protein			-2.28647	0	0	0	0
AT3G10930	AT3G10930	Uncharacterized protein			-0.726074	0	0	0	0
AT3G25250	AGC2-1	AGC (cAMP-dependent, cGMP-dependent and protein kinase C) kinase family protein			-0.86217	0	0	0	0
AT3G26060	PRXQ	Thioredoxin superfamily protein			-1.14934	0	0	0	0
AT3G52960	AT3G52960	Thioredoxin superfamily protein			-0.339041	0	0	0	0
AT4G08780	AT4G08780	Peroxidase superfamily protein			-0.619125	0	0	0	0
AT4G09010	TL29	Ascorbate peroxidase 4			-1.2581	0	0	0	0
AT4G12720	NUDT7	MutT/nudix family protein			-0.752344	0	0	0	0
AT4G17490	ERF6	Ethylene responsive element binding factor 6			-0.502186	0	0	0	0
AT4G20830	AT4G20830	FAD-binding Berberine family protein			-1.07816	0	0	0	0
AT4G35090	CAT2	Catalase 2			-0.300827	0	0	0	0
AT4G37610	BT5	BTB and TAZ domain protein 5			-0.477591	0	0	0	0
AT5G01600	FER1	Ferretin 1			-0.440995	0	0	0	0
AT5G06290	2-Cys Prx B	2-cysteine peroxiredoxin B			-0.607446	0	0	0	0
AT5G06720	PA2	Peroxidase 2			-1.20101	0	0	0	0
AT5G18100	CSD3	Copper/zinc superoxide dismutase 3			-0.476715	0	0	0	0
AT5G19875	AT5G19875	Uncharacterized protein			-1.1011	0	0	0	0
AT5G38000	AT5G38000	Zinc-binding dehydrogenase family protein			-0.602913	0	0	0	0
AT5G42380	CML37	Calmodulin like 37			-1.79016	0	0	0	0
AT5G46350	WRKY8	WRKY DNA-binding protein 8			-2.70408	0	0	0	0
AT5G47650	NUDT2	Nudix hydrolase homolog 2			-0.764615	0	0	0	0
AT5G52310	LTI78	Low-temperature-responsive protein 78 (LTI78) / desiccation-responsive protein 29A (RD29A)			-1.40775	0	0	0	0
AT5G59720	HSP18.2	Heat shock protein 18.2			-1.16556	0	0	0	0
AT5G60890	MYB34	Myb domain protein 34			-0.279964	0	0	0	0
AT5G66390	AT5G66390	Peroxidase superfamily protein			-0.385349	0	0	0	0
AT5G67480	BT4	BTB and TAZ domain protein 4			-0.622453	0	0	0	0
GO enrichment analysis
GO-BP
Enrichment FDR	nGenes	Biological Process (BP)	Pathway Genes	Fold Enrichment
2.6995e-15	10	GO:0042744 Hydrogen peroxide catabolic proc.	99	75.4272
1.32164e-10	7	GO:0042542 Response to hydrogen peroxide	72	72.5987
1.52614e-20	14	GO:0000302 Response to reactive oxygen species	161	64.933
1.79972e-14	10	GO:0042743 Hydrogen peroxide metabolic proc.	122	61.2074
2.15994e-58	35	GO:0006979 Response to oxidative stress	453	57.6943
2.18257e-08	6	GO:0034599 Cellular response to oxidative stress	81	55.3133
4.34282e-18	13	GO:0098869 Cellular oxidant detoxification	176	55.1562
1.21165e-17	13	GO:1990748 Cellular detoxification	194	50.0386
1.21165e-17	13	GO:0097237 Cellular response to toxic substance	195	49.782
1.05906e-15	12	GO:0072593 Reactive oxygen species metabolic proc.	199	45.0289
2.59082e-15	13	GO:0098754 Detoxification	299	32.4665
1.03163e-14	13	GO:0009636 Response to toxic substance	340	28.5514
1.20205e-09	11	GO:0044248 Cellular catabolic proc.	524	15.6756
7.67736e-15	21	GO:0070887 Cellular response to chemical stimulus	1725	9.09062
4.99554e-09	14	GO:0033554 Cellular response to stress	1225	8.53405
1.13738e-12	19	GO:1901700 Response to oxygen-containing compound	1675	8.47037
1.6331e-22	31	GO:0042221 Response to chemical	2995	7.72909
6.4247e-30	37	GO:0006950 Response to stress	3912	7.06263
9.97637e-11	19	GO:0009628 Response to abiotic stimulus	2169	6.5412
1.28852e-11	23	GO:0051716 Cellular response to stimulus	3266	5.25866
GO-MF
Enrichment FDR	nGenes	Molecular Function (MF)	Pathway Genes	Fold Enrichment
0.0224216	1	GO:0004096 Catalase activity	3	248.91
4.46604e-06	3	GO:0051920 Peroxiredoxin activity	11	203.654
0.000384848	2	GO:0000210 Nad+ diphosphatase activity	8	186.682
0.000384848	2	GO:0008379 Thioredoxin peroxidase activity	8	186.682
0.000384848	2	GO:0140824 Thioredoxin-dependent peroxiredoxin activity	8	186.682
0.000569964	2	GO:0047631 Adp-ribose diphosphatase activity	10	149.346
0.030212	1	GO:0004322 Ferroxidase activity	5	149.346
0.000774927	2	GO:0035529 Nadh pyrophosphatase activity	12	124.455
0.00131059	2	GO:0004551 Dinucleotide phosphatase activity	16	93.3412
1.06894e-17	12	GO:0004601 Peroxidase activity	137	65.407
1.21158e-17	12	GO:0016684 Oxidoreductase activity acting on peroxide as acceptor	143	62.6626
2.66715e-18	13	GO:0016209 Antioxidant activity	167	58.1287
0.00989181	2	GO:0016671 Oxidoreductase activity acting on a sulfur group of donors disulfide as acceptor	45	33.188
1.16339e-09	10	GO:0020037 Heme binding	385	19.3956
0.0265927	2	GO:0051287 Nad binding	79	18.9046
2.31806e-09	10	GO:0046906 Tetrapyrrole binding	421	17.737
1.02518e-13	19	GO:0016491 Oxidoreductase activity	1478	9.59937
4.46604e-06	18	GO:0046872 Metal ion binding	3803	3.53435
4.46604e-06	18	GO:0043169 Cation binding	3826	3.5131
GO-CC
Enrichment FDR	nGenes	Cellular Component (CC)	Pathway Genes	Fold Enrichment
0.043963	1	GO:0009533 Chloroplast stromal thylakoid	9	82.97
0.00861633	2	GO:0010319 Stromule	39	38.2938
0.0117413	2	GO:0009543 Chloroplast thylakoid lumen	51	29.2835
0.0117413	2	GO:0031978 Plastid thylakoid lumen	51	29.2835
0.0143779	2	GO:0010287 Plastoglobule	62	24.0881
0.0187667	2	GO:0031977 Thylakoid lumen	74	20.1819
0.00119496	7	GO:0009570 Chloroplast stroma	767	6.815
0.00119496	7	GO:0009532 Plastid stroma	774	6.75337
0.000137826	10	GO:0005773 Vacuole	1188	6.2856
0.00281855	7	GO:0009526 Plastid envelope	995	5.25337
0.0325743	4	GO:0009579 Thylakoid	601	4.96992
0.00178451	10	GO:0005576 Extracellular region	1876	3.98044
0.0143779	7	GO:0031967 Organelle envelope	1479	3.53422
0.00743947	10	GO:0009507 Chloroplast	2403	3.10749
0.00281855	12	GO:0009536 Plastid	2910	3.0793
Transcription factor enrichment analysis
TF-AGRIS
Enrichment FDR	nGenes	Transcription Factor Binding Motif	Pathway Genes	Fold Enrichment
NS
Shoot					Log2FC					TF target
Gene ID	Symbol	Description			Col	adc1	OXCuAO3	cdr7/cuao3	OXPtADC	N.S.
AT1G05680	UGT74E2	Uridine diphosphate glycosyltransferase 74E2			-2.13856	0	0	0	0
AT1G12480	OZS1	C4-dicarboxylate transporter/malic acid transport protein			-0.972343	0	0	0	0
AT1G22770	GI	Gigantea protein (GI)			-1.59922	0	0	0	0
AT1G27350	AT1G27350	Ribosome associated membrane protein RAMP4			-0.772974	0	0	0	0
AT1G27730	STZ	Salt tolerance zinc finger			-1.02375	0	0	0	0
AT1G72520	LOX4	PLAT/LH2 domain-containing lipoxygenase family protein			-0.640933	0	0	0	0
AT1G78380	GSTU19	Glutathione S-transferase TAU 19			-0.570641	0	0	0	0
AT2G20270	AT2G20270	Thioredoxin superfamily protein			-0.562788	0	0	0	0
AT2G31570	GPX2	Glutathione peroxidase 2			-0.414533	0	0	0	0
AT3G10920	MSD1	Manganese superoxide dismutase 1			-0.496194	0	0	0	0
AT3G47860	CHL	Chloroplastic lipocalin			-0.380253	0	0	0	0
AT3G53990	AT3G53990	Adenine nucleotide alpha hydrolases-like superfamily protein			-0.502299	0	0	0	0
AT3G56400	WRKY70	WRKY DNA-binding protein 70			-1.38728	0	0	0	0
AT4G00860	ATOZI1	Monopolar spindle protein (DUF1138)			-0.576453	0	0	0	0
AT4G09320	NDPK1	Nucleoside diphosphate kinase			-0.604755	0	0	0	0
AT4G11600	GPX6	Glutathione peroxidase 6			-0.666873	0	0	0	0
AT4G17040	CLPR4	CLP protease R subunit 4			-0.443062	0	0	0	0
AT4G35460	NTRB	NADPH-dependent thioredoxin reductase B			-0.881473	0	0	0	0
AT4G37610	BT5	BTB and TAZ domain protein 5			-0.684228	0	0	0	0
AT5G17000	AT5G17000	Zinc-binding dehydrogenase family protein			-0.583239	0	0	0	0
AT5G26030	FC1	Ferrochelatase 1			-0.661186	0	0	0	0
AT5G42380	CML37	Calmodulin like 37			-1.53749	0	0	0	0
AT5G42980	TRX3	Thioredoxin 3			-0.506737	0	0	0	0
AT5G58070	TIL	Temperature-induced lipocalin			-0.828341	0	0	0	0
AT5G64110	AT5G64110	Peroxidase superfamily protein			-1.01024	0	0	0	0
GO enrichment analysis
GO-BP
Enrichment FDR	nGenes	Pathways	Pathway Genes	Fold Enrichment
7.06355e-07	4	GO:0010193 Response to ozone	33	133.959
1.06147e-06	4	GO:0034614 Cellular response to reactive oxygen species	37	119.477
6.2963e-21	13	GO:0000302 Response to reactive oxygen species	161	89.2365
4.63729e-07	5	GO:0034599 Cellular response to oxidative stress	81	68.2198
8.99467e-40	24	GO:0006979 Response to oxidative stress	453	58.5515
2.75386e-06	5	GO:0062197 Cellular response to chemical stress	129	42.8357
4.63729e-07	6	GO:0098869 Cellular oxidant detoxification	176	37.6759
6.58035e-07	6	GO:1990748 Cellular detoxification	194	34.1802
6.58035e-07	6	GO:0097237 Cellular response to toxic substance	195	34.0049
6.58035e-07	7	GO:0009636 Response to toxic substance	340	22.7533
5.37063e-06	6	GO:0098754 Detoxification	299	22.1771
2.30815e-06	7	GO:0009415 Response to water	429	18.0329
3.07621e-06	7	GO:0001101 Response to acid chemical	459	16.8543
3.55596e-12	16	GO:1901700 Response to oxygen-containing compound	1675	10.5568
1.84545e-07	11	GO:0033554 Cellular response to stress	1225	9.92389
2.37169e-09	14	GO:0070887 Cellular response to chemical stimulus	1725	8.96941
4.94295e-15	21	GO:0042221 Response to chemical	2995	7.74904
8.79033e-20	25	GO:0006950 Response to stress	3912	7.06263
2.75386e-06	12	GO:0009628 Response to abiotic stimulus	2169	6.1143
6.75048e-08	16	GO:0051716 Cellular response to stimulus	3266	5.41413
GO-MF
Enrichment FDR	nGenes	Pathways	Pathway Genes	Fold Enrichment
0.0340529	1	GO:0004325 Ferrochelatase activity	3	368.387
0.0408458	1	GO:0016165 Linoleate 13s-lipoxygenase activity	4	276.29
0.000795846	2	GO:0004602 Glutathione peroxidase activity	10	221.032
0.00439238	2	GO:0045735 Nutrient reservoir activity	27	81.8637
0.0107325	2	GO:0015036 Disulfide oxidoreductase activity	45	49.1182
8.10769e-07	6	GO:0016209 Antioxidant activity	167	39.7063
0.00137455	3	GO:0016667 Oxidoreductase activity acting on a sulfur group of donors	90	36.8387
0.000225933	4	GO:0004601 Peroxidase activity	137	32.2674
0.000225933	4	GO:0016684 Oxidoreductase activity acting on peroxide as acceptor	143	30.9136
1.64165e-05	10	GO:0016491 Oxidoreductase activity	1478	7.4774
GO-CC
Enrichment FDR	nGenes	Pathways	Pathway Genes	Fold Enrichment
0.0412075	1	GO:0009368 Endopeptidase clp complex	10	110.516
0.0235511	3	GO:0005777 Peroxisome	353	9.39229
0.0235511	3	GO:0042579 Microbody	353	9.39229
0.0235511	4	GO:0009941 Chloroplast envelope	701	6.30619
0.0245908	4	GO:0009570 Chloroplast stroma	767	5.76355
0.0245908	4	GO:0009532 Plastid stroma	774	5.71142
0.0177613	5	GO:0009526 Plastid envelope	995	5.55357
0.000356818	9	GO:0005739 Mitochondrion	1853	5.36775
0.000356818	10	GO:0009507 Chloroplast	2403	4.59908
0.000356818	11	GO:0005829 Cytosol	2784	4.36665
0.000356818	11	GO:0009536 Plastid	2910	4.17758
0.0412075	5	GO:0031967 Organelle envelope	1479	3.73617
0.0215369	8	GO:0005886 Plasma membrane	2804	3.1531
0.017457	9	GO:0071944 Cell periphery	3232	3.07749
Transcription factor enrichment analysis
TF-AGRIS
Enrichment FDR	nGenes	Pathways	Pathway Genes	Fold Enrichment
NS

## Sheet: Cluster-g
GO- and Transcription Factor- Enrichment analyses of Cluster g genes
Root
Gene ID	Symbol	Description
No Cluster
Shoot					Log2FC					TF target
Gene ID	Symbol	Description			Col	adc1	OXCuAO3	cdr7/cuao3	OXPtADC	NS
AT1G66330	AT1G66330	Senescence-associated family protein			-1.07032	-0.823291	-0.858982	0	0
AT1G76080	CDSP32	Chloroplastic drought-induced stress protein of 32 kD			-1.17093	-0.620953	-0.695385	0	0
AT2G19310	AT2G19310	HSP20-like chaperones superfamily protein			-1.54624	-1.02281	-0.735314	0	0
AT2G37860	LCD1	Reticulata-like protein, putative (DUF3411)			-0.854017	-0.632125	-0.669156	0	0
AT2G39460	RPL23AA	Ribosomal protein L23AA			-0.595825	-0.438447	-0.611954	0	0
AT2G41680	NTRC	NADPH-dependent thioredoxin reductase C			-0.707193	-0.773589	-0.951543	0	0
AT3G11630	AT3G11630	Thioredoxin superfamily protein			-0.709013	-0.755754	-0.872731	0	0
AT3G25530	GLYR1	Glyoxylate reductase 1			-0.850096	-0.450767	-0.428531	0	0
AT3G26060	PRXQ	Thioredoxin superfamily protein			-0.822526	-0.811457	-0.978179	0	0
AT4G08390	SAPX	Stromal ascorbate peroxidase			-0.58552	-0.761567	-0.68515	0	0
AT5G01820	SR1	Serine/threonine protein kinase 1			-0.991161	-1.24497	-1.32312	0	0
AT5G13650	SVR3	Elongation factor family protein			-0.589154	-0.667405	-0.861912	0	0
AT5G37770	TCH2	EF hand calcium-binding protein family			-0.991682	-0.813798	-0.542105	0	0
AT5G57345	AT5G57345	Uncharacterized protein			-0.944897	-0.536892	-0.405422	0	0
GO enrichment analysis
GO-BP
Enrichment FDR	nGenes	Pathways	Pathway Genes	Fold Enrichment
1.26517e-07	4	GO:0045454 Cell redox homeostasis	42	187.952
1.4536e-08	5	GO:0034599 Cellular response to oxidative stress	81	121.821
1.26517e-07	5	GO:0062197 Cellular response to chemical stress	129	76.4922
6.66129e-09	6	GO:0000302 Response to reactive oxygen species	161	73.5466
1.39552e-20	13	GO:0006979 Response to oxidative stress	453	56.6347
2.45e-05	4	GO:0098869 Cellular oxidant detoxification	176	44.8523
3.15769e-05	4	GO:1990748 Cellular detoxification	194	40.6907
3.15769e-05	4	GO:0097237 Cellular response to toxic substance	195	40.4821
6.38782e-05	4	GO:0019725 Cellular homeostasis	237	33.308
9.17213e-05	4	GO:0009408 Response to heat	264	29.9015
0.000140978	4	GO:0098754 Detoxification	299	26.4013
1.96703e-05	5	GO:0009409 Response to cold	400	24.6687
0.000220511	4	GO:0009636 Response to toxic substance	340	23.2176
2.72664e-07	7	GO:0009266 Response to temperature stimulus	648	21.3187
0.000413868	4	GO:0042592 Homeostatic proc.	405	19.4914
7.52136e-06	8	GO:1901700 Response to oxygen-containing compound	1675	9.42567
3.34336e-06	9	GO:0009628 Response to abiotic stimulus	2169	8.1888
9.2346e-09	12	GO:0042221 Response to chemical	2995	7.90718
1.23754e-10	14	GO:0006950 Response to stress	3912	7.06263
0.0011058	6	GO:0070887 Cellular response to chemical stimulus	1725	6.86435
GO-MF
Enrichment FDR	nGenes	Pathways	Pathway Genes	Fold Enrichment
0.000510096	2	GO:0051920 Peroxiredoxin activity	11	358.818
0.0263058	1	GO:0030267 Glyoxylate reductase (nadph) activity	7	281.929
0.0263058	1	GO:0106345 Glyoxylate reductase activity	7	281.929
0.0263058	1	GO:0008379 Thioredoxin peroxidase activity	8	246.688
0.0263058	1	GO:0016688 L-ascorbate peroxidase activity	8	246.688
0.0263058	1	GO:0140824 Thioredoxin-dependent peroxiredoxin activity	8	246.688
0.0273111	1	GO:0004791 Thioredoxin-disulfide reductase (nadph) activity	9	219.278
0.039403	1	GO:0047134 Protein-disulfide reductase (nad(p)h) activity	14	140.964
0.0030306	2	GO:0016671 Oxidoreductase activity acting on a sulfur group of donors disulfide as acceptor	45	87.7111
9.58918e-05	4	GO:0016209 Antioxidant activity	167	47.2695
0.000749026	3	GO:0004601 Peroxidase activity	137	43.2153
0.000749026	3	GO:0016684 Oxidoreductase activity acting on peroxide as acceptor	143	41.4021
0.000749026	6	GO:0016491 Oxidoreductase activity	1478	8.0115
GO-CC
Enrichment FDR	nGenes	Pathways	Pathway Genes	Fold Enrichment
0.0341389	1	GO:0009533 Chloroplast stromal thylakoid	9	219.278
3.5243e-05	6	GO:0009570 Chloroplast stroma	767	15.4381
3.5243e-05	6	GO:0009532 Plastid stroma	774	15.2984
0.00402882	4	GO:0009941 Chloroplast envelope	701	11.2611
0.0125309	4	GO:0009526 Plastid envelope	995	7.93367
0.0001204	8	GO:0009507 Chloroplast	2403	6.57012
0.000376277	8	GO:0009536 Plastid	2910	5.42543
0.0354108	4	GO:0031967 Organelle envelope	1479	5.33739
0.0131047	6	GO:0005829 Cytosol	2784	4.25323
Transcription factor enrichment analysis
TF-AGRIS
Enrichment FDR	nGenes	Pathways	Pathway Genes	Fold Enrichment
NS

## Sheet: Cluster-h
GO- and Transcription Factor- Enrichment analyses of Cluster h genes
Root					Log2FC					TF target
Gene ID	Symbol	Description			Col	adc1	OXCuAO3	cdr7/cuao3	OXPtADC	CBF3
AT1G09350	GolS3	Galactinol synthase 3			-2.38346	-2.59672	-3.30368	-2.86478	0	x
AT2G18150	AT2G18150	Peroxidase superfamily protein			-1.47465	-1.21119	-1.21226	-1.11366	0	x
AT2G47180	GolS1	Galactinol synthase 1			-1.5791	-0.816106	-1.25446	-1.42938	0	x
AT5G40390	SIP1	Raffinose synthase family protein			-0.647469	-0.895556	-0.823294	-0.942115	0	x
GO enrichment analysis
GO-BP
Enrichment FDR	nGenes	Biological Process (BP)	Pathway Genes	Fold Enrichment
8.93069e-05	2	GO:0006012 Galactose metabolic proc.	26	531.327
0.0016975	2	GO:0019318 Hexose metabolic proc.	137	100.836
0.00186688	2	GO:0005996 Monosaccharide metabolic proc.	185	74.673				``
0.0356417	1	GO:0042744 Hydrogen peroxide catabolic proc.	99	69.7702
2.49648e-06	4	GO:0006979 Response to oxidative stress	453	60.9912
0.0409428	1	GO:0042743 Hydrogen peroxide metabolic proc.	122	56.6168
0.0475034	1	GO:0098869 Cellular oxidant detoxification	176	39.2457
0.0475034	1	GO:0097237 Cellular response to toxic substance	195	35.4218
0.0475034	1	GO:0072593 Reactive oxygen species metabolic proc.	199	34.7098
0.00549759	2	GO:0009409 Response to cold	400	34.5363
0.00549759	2	GO:0009414 Response to water deprivation	418	33.049
0.00549759	2	GO:0009415 Response to water	429	32.2016
0.00565663	2	GO:0001101 Response to acid chemical	459	30.0969
0.00931471	2	GO:0009266 Response to temperature stimulus	648	21.3187
0.00186688	3	GO:0005975 Carbohydrate metabolic proc.	1133	18.2893
0.00578822	3	GO:0009628 Response to abiotic stimulus	2169	9.5536
0.0444076	2	GO:1901700 Response to oxygen-containing compound	1675	8.24746
0.0458505	2	GO:0044281 Small molecule metabolic proc.	1758	7.85808
0.00234142	4	GO:0006950 Response to stress	3912	7.06263
0.0125921	3	GO:0042221 Response to chemical	2995	6.91878
GO-MF
Enrichment FDR	nGenes	Molecular Function (MF)	Pathway Genes	Fold Enrichment
3.52037e-06	2	GO:0047216 Inositol 3-alpha-galactosyltransferase activity	8	1726.81
0.00165422	1	GO:0047274 Galactinol-sucrose galactosyltransferase activity	5	1381.45
1.00543e-05	2	GO:0035250 Udp-galactosyltransferase activity	16	863.406
2.4089e-07	3	GO:0008378 Galactosyltransferase activity	44	470.949
3.59344e-05	3	GO:0016758 Hexosyltransferase activity	364	56.9279
0.0273918	1	GO:0004601 Peroxidase activity	137	50.4179
0.0273918	1	GO:0016684 Oxidoreductase activity acting on peroxide as acceptor	143	48.3024
0.00165422	2	GO:0008194 Udp-glycosyltransferase activity	302	45.7434
0.0294898	1	GO:0016209 Antioxidant activity	167	41.3608
0.000147773	3	GO:0016757 Glycosyltransferase activity	629	32.944
0.016912	3	GO:0046872 Metal ion binding	3803	5.44879
0.016912	3	GO:0043169 Cation binding	3826	5.41604
0.0189961	3	GO:0016740 Transferase activity	4132	5.01494
GO-CC
Enrichment FDR	nGenes	Cellular Component (CC)	Pathway Genes	Fold Enrichment
NS
Transcription factor enrichment analysis
TF-AGRIS
Enrichment FDR	nGenes	Transcription Factor Binding Motif	Pathway Genes	Fold Enrichment
0.0397398	4	CBF3 target gene	4064	6.79847
Shoot					Log2FC					TF target
Gene ID	Symbol	Description			Col	adc1	OXCuAO3	cdr7/cuao3	OXPtADC	N.S.
AT1G03680	THM1	Thioredoxin M-type 1			-0.638765	-0.378021	-0.415455	-0.651587	0
AT3G04120	GAPC1	Glyceraldehyde-3-phosphate dehydrogenase C subunit 1			-0.859823	-0.525693	-0.660205	-0.900276	0
AT3G15360	TRX-M4	Thioredoxin M-type 4			-1.12294	-0.905126	-0.875946	-0.945272	0
AT3G23400	FIB4	Plastid-lipid associated protein PAP / fibrillin family protein			-0.873015	-0.6946	-0.763668	-0.868944	0
AT4G12000	AT4G12000	SNARE associated Golgi protein family			-1.46507	-1.5047	-1.1959	-1.98733	0
AT4G35090	CAT2	Catalase 2			-0.56124	-0.448599	-1.03127	-0.380715	0
AT5G12080	MSL10	Mechanosensitive channel of small conductance-like 10			-1.02185	-0.748462	-0.843255	-0.964119	0
AT5G21100	AT5G21100	Plant L-ascorbate oxidase			-1.34641	-1.12598	-1.03933	-1.17561	0
AT5G28030	DES1	L-cysteine desulfhydrase 1			-2.29184	-1.97699	-1.3927	-2.23573	0
AT5G40390	SIP1	Raffinose synthase family protein			-0.99784	-0.874661	-1.26996	-1.50188	0
AT5G60890	MYB34	Myb domain protein 34			-0.764127	-1.53991	-1.69816	-1.01847	0
GO enrichment analysis
GO-BP
Enrichment FDR	nGenes	Pathways	Pathway Genes	Fold Enrichment
0.0202228	1	GO:0050687 Neg. reg. of defense response to virus	3	837.242
0.0202228	1	GO:0050982 Detection of mechanical stimulus	3	837.242
0.000186862	3	GO:0042542 Response to hydrogen peroxide	72	104.655
3.8417e-07	5	GO:0000302 Response to reactive oxygen species	161	78.004
0.0121694	2	GO:0006109 Reg. of carbohydrate metabolic proc.	76	66.0981
2.10365e-10	8	GO:0006979 Response to oxidative stress	453	44.3572
0.0202228	2	GO:0043085 Pos. reg. of catalytic activity	119	42.2139
0.0202228	2	GO:0044093 Pos. reg. of molecular function	131	38.347
0.0273745	2	GO:0009267 Cellular response to starvation	164	30.6308
0.0273745	2	GO:0005996 Monosaccharide metabolic proc.	185	27.1538
0.0273745	2	GO:0008219 Cell death	190	26.4392
0.0273745	3	GO:0009266 Response to temperature stimulus	648	11.6284
0.00167174	5	GO:0005975 Carbohydrate metabolic proc.	1133	11.0844
0.0126792	4	GO:0019752 Carboxylic acid metabolic proc.	1005	9.99692
0.000945521	6	GO:1901700 Response to oxygen-containing compound	1675	8.99723
0.016798	4	GO:0043436 Oxoacid metabolic proc.	1135	8.8519
0.016798	4	GO:0006082 Organic acid metabolic proc.	1136	8.84411
0.00257464	6	GO:0009628 Response to abiotic stimulus	2169	6.94807
2.77706e-06	10	GO:0006950 Response to stress	3912	6.42057
0.00167174	7	GO:0042221 Response to chemical	2995	5.87048
GO-MF
Enrichment FDR	nGenes	Pathways	Pathway Genes	Fold Enrichment
0.00679642	1	GO:0004096 Catalase activity	3	837.242
0.00679642	1	GO:0004123 Cystathionine gamma-lyase activity	3	837.242
0.00679642	1	GO:0008447 L-ascorbate oxidase activity	3	837.242
0.00679642	1	GO:0080146 L-cysteine desulfhydrase activity	3	837.242
0.00981349	1	GO:0047274 Galactinol-sucrose galactosyltransferase activity	5	502.345
0.0114449	1	GO:0004365 Glyceraldehyde-3-phosphate dehydrogenase (nad+) (phosphorylating) activity	7	358.818
0.0114449	1	GO:0043891 Glyceraldehyde-3-phosphate dehydrogenase [nad(p)+] (phosphorylating) activity	7	358.818
0.0139354	1	GO:0004124 Cysteine synthase activity	9	279.081
0.00226789	2	GO:1901149 Salicylic acid binding	28	179.409
0.00226789	2	GO:0015035 Protein-disulfide reductase activity	31	162.047
0.00226789	2	GO:0015036 Disulfide oxidoreductase activity	45	111.632
0.00226789	2	GO:0016671 Oxidoreductase activity acting on a sulfur group of donors disulfide as acceptor	45	111.632
0.00422923	2	GO:0033293 Monocarboxylic acid binding	70	71.7636
0.00679642	2	GO:0031406 Carboxylic acid binding	115	43.6822
0.00679642	2	GO:0043177 Organic acid binding	115	43.6822
0.00971108	2	GO:0008047 Enzyme activator activity	163	30.8187
0.0114449	2	GO:0005507 Copper ion binding	194	25.8941
0.0141693	2	GO:0004857 Enzyme inhibitor activity	243	20.6727
0.00226789	5	GO:0016491 Oxidoreductase activity	1478	8.49705
GO-CC
Enrichment FDR	nGenes	Pathways	Pathway Genes	Fold Enrichment
0.0196251	1	GO:0009514 Glyoxysome	13	193.21
0.00194721	2	GO:0010319 Stromule	39	128.807
0.0093944	3	GO:0009579 Thylakoid	601	12.5377
0.0314221	2	GO:0009535 Chloroplast thylakoid membrane	423	11.8758
0.0314221	2	GO:0055035 Plastid thylakoid membrane	425	11.8199
0.0314221	2	GO:0042651 Thylakoid membrane	444	11.3141
0.0314221	2	GO:0034357 Photosynthetic membrane	445	11.2887
0.0314221	2	GO:0048046 Apoplast	457	10.9922
0.0125096	3	GO:0009941 Chloroplast envelope	701	10.7492
0.00427904	4	GO:0009526 Plastid envelope	995	10.0974
0.012894	3	GO:0009570 Chloroplast stroma	767	9.82423
0.012894	3	GO:0009532 Plastid stroma	774	9.73538
0.0321614	2	GO:0009534 Chloroplast thylakoid	520	9.66049
0.00194721	5	GO:0031967 Organelle envelope	1479	8.4913
0.00121906	7	GO:0009536 Plastid	2910	6.04196
0.0093944	5	GO:0009507 Chloroplast	2403	5.22623
0.0314221	4	GO:0043228 Non-membrane-bounded organelle	2550	3.93996
0.0314221	4	GO:0043232 Intracellular non-membrane-bounded organelle	2550	3.93996
0.0321614	4	GO:0005829 Cytosol	2784	3.6088
0.0321614	4	GO:0005886 Plasma membrane	2804	3.58306
Transcription factor enrichment analysis
TF-AGRIS
Enrichment FDR	nGenes	Pathways	Pathway Genes	Fold Enrichment
NS

[truncated: 8 more sheets: Cluster-i , Cluster-j, Cluster-k, Cluster-l, Cluster-m, Cluster-n, Cluster-o, Cluster-p]
