# Supplementary material
Source: Research Square preprint supplement (doi:10.21203/rs.3.rs-9349369/v1)
Supplement: Supplementary file 3 [file 4d1af404ab0025c75bfb8d62.xlsx]

## Sheet: Supplemental Table S1
Supplemental Table S1. The expression of genes involved in polyamine metabolism is not affected by spaceflight conditions. The transcriptome data from five previous spaceflight experiments in Arabidopsis were used. Key genes from the polyamine metabolism pathways were analyzed for their transcriptional responses to spaceflight conditions. Expression responses are reported as Log2(Fold expression …
		ABRS growth chamber/OSD-7						BRIC19/GLDS-37				BRIC-20/GLDS-38		APEX04		PS and PRR		APEX08
		Pual et al., 2013						Choi et al., 2019				Wyatt-2020		Paul et al., 2021		Land et al., 2024		This work
Tissue type		Col-Leaf		Col-Hypo		Col-Root		Col	Ler	cvi	Ws	Col-whole		Col-Shoot	Col-Root	Col-Shoot		Col-Root		Col-Shoot
Gene ID	Name	Log2FC	padj	Log2FC	padj	Log2FC	padj	Log2FC	Log2FC	Log2FC	Log2FC	Log2FC	padj	Log2FC	Log2FC	Log2FC	padj	Log2FC	padj	Log2FC	padj
AT2G16500	ADC1	NS		NS		NS		NS	NS	2.83	NS	NS		NS	NS	NS		NS		-1.15711	6.25028e-14
AT4G34710	ADC2	NS		NS		NS		NS	NS	NS	NS	NS		NS	NS	NS		-0.501972	0.000132204	NS
AT4G08900	ARGAH1	NS		NS		NS		NS	NS	NS	NS	NS		NS	NS	NS		NS		NS
AT4G08870	ARGAH2	NS		NS		NS		NS	NS	NS	NS	2.0236	3.60344e-05	NS	NS	-0.885815	0.000189473	NS		-1.13192	0.000156198
AT1G65840	PAO4	NS		NS		NS		NS	NS	NS	NS	NS		NS	NS	0.916634	0.00216762	NS		NS
AT4G29720	PAO5	NS		NS		NS		NS	NS	NS	NS	NS		NS	NS	NS		NS		-0.529124	0.00563249
AT2G43020	PAO2	NS		NS		NS		NS	NS	NS	NS	NS		NS	NS	NS		NS		-1.00277	5.11605e-06
AT3G59050	PAO3	NS		NS		NS		2.83	NS	NS	NS	NS		NS	NS	NS		NS		-0.668833	0.000860693
AT5G13700	PAO1	NS		NS		NS		NS	NS	NS	NS	NS		NS	NS	-0.941358	5.02436e-07	-1.36589	1.63e-07	NS
AT5G53120	SPDS3	NS		NS		NS		NS	NS	NS	NS	NS		NS	NS	NS		NS		-0.983162	5.84981e-05
AT1G70310	SPDS2	NS		NS		NS		NS	NS	NS	NS	NS		NS	NS	NS		NS		NS
AT1G23820	SPDS1	NS		NS		NS		NS	NS	NS	NS	NS		NS	NS	NS		NS		NS
AT3G02470	SAMDC	NS		NS		NS		NS	NS	NS	NS	NS		NS	NS	NS		NS		NS
AT5G15950	SAMDC2	NS		NS		NS		NS	NS	NS	NS	NS		NS	NS	-0.716992	0.000240473	-2.96264	3.28e-43	-2.92371	8.53683e-34
AT3G25570	SAMDC3	NS		NS		NS		NS	NS	NS	NS	NS		NS	NS	NS		NS		-0.967243	0.00209416
AT5G18930	SAMDC4	NS		NS		NS		NS	NS	NS	NS	NS		NS	NS	NS		NS		NS
AT3G17715	SAMDC5	NS		NS		NS		NS	NS	NS	NS	NS		NS	NS	NS		NS		NS
AT1G62810	AtCuAO1	NS		NS		NS		NS	NS	NS	NS	NS		NS	NS	NS		0.806004	1.03e-12	0.815626	3.57418e-05
AT1G31710	AtCuAO2	NS		NS		NS		NS	NS	NS	0.45	NS		NS	NS	NS		NS		NS
AT2G42490	AtCuAO3	NS		NS		NS		NS	NS	NS	NS	NS		NS	NS	NS		NS		NS
AT4G14940	ATAO1	NS		NS		NS		NS	NS	NS	NS	NS		NS	NS	NS		NS		NS
