# Supplementary material
Source: Research Square preprint supplement (doi:10.21203/rs.3.rs-9349369/v1)
Supplement: Supplementary file 5 [file 58bc377c420e9adcbeb11ce3.xlsx]

## Sheet: Supplemental table S11
Supplemental Table S11. Cell wall-related GO groups are enriched in the lists of spaceflight-responsive Col DEGs.
				Arabidopsis genome	Root-down			Root-up			Shoot-down			Shoot-up
				Gene number	Gene number	Fold Enrichment	FDR	Gene number	Fold Enrichment	FDR	Gene number	Fold Enrichment	FDR	Gene number	Fold Enrichment	FDR
			Input	27475	1619			1156			3230			3008
cell periphery (GO:0071944)				3225	307	1.63	2.36e-14	200	1.5	1.68e-06	515	1.39	8.16e-15	503	1.44	2.86e-16
	external encapsulating structure (GO:0030312)			538	79	2.52	1.26e-13	39	1.75	0.0246	108	1.75	8.52e-08	84	1.44	0.00747
		cell wall (GO:0005618)		516	79	2.62	1.27e-12	38	1.78	0.0202	107	1.8	1.78e-08	82	1.47	0.00592
			plant-type cell wall (GO:0009505)	500	79	2.71	3.38e-17	37	1.79	0.0245	106	1.84	6e-09	80	1.48	0.00502
