# Supplementary material
Source: Research Square preprint supplement (doi:10.21203/rs.3.rs-9349369/v1)
Supplement: Supplementary file 6 [file 5aa7e7f54d81426c581e79b4.xlsx]

## Sheet: Supplemental Table S3
Supplemental Table S3. GO enrichment analysis of spaceflight-associated DEGs for all genotypes and organs included in APEX08. Numbers represent the FDR-value for enrichment significance.NS represents no significance.
		Root-up	Root-up	Root-up	Root-up	Root-up	Root-down	Root-down	Root-down	Root-down	Root-down	Shoot-up	Shoot-up	Shoot-up	Shoot-up	Shoot-up	Shoot-down	Shoot-down	Shoot-down	Shoot-down	Shoot-down	Root-all	Root-all	Root-all	Root-all	Root-all	Shoot-all	Shoot-all	Shoot-all	Shoot-all	Shoot-all
GO-group ID	Description	Col	adc1	OXCuAO3	cuao3	OXPtADC	Col	adc1	OXCuAO3	cuao3	OXPtADC	Col	adc1	OXCuAO3	cuao3	OXPtADC	Col	adc1	OXCuAO3	cuao3	OXPtADC	Col	adc1	OXCuAO3	cuao3	OXPtADC	Col	adc1	OXCuAO3	cuao3	OXPtADC
0009415	response to water (GO:0009415)	NS	NS	0.0255	NS	NS	1.57e-14	7.62e-05	7.73e-08	1.03e-06	6.37e-05	9.39e-06	8.15e-11	2.52e-10	2.36e-05	4.29e-05	0.000265	0.0064	NS	0.0186	NS	9.31e-15	3.62e-06	2.47e-10	1.95e-08	6.61e-05	1.46e-11	2.7e-14	1.07e-09	4.68e-08	1.28e-06
0009059	macromolecule biosynthetic process (GO:0009059)	1.23e-06	2.42e-09	6.77e-09	NS	0.00404	NS	0.0307	0.015	NS	0.0115	NS	0.0235	7.18e-07	NS	0.000433	3.65e-16	3.8e-14	7.17e-28	NS	NS	0.000156	1.43e-11	1.14e-10	0.0466	1.63e-06	9.9e-12	0.000757	8.75e-06	NS	0.00876
0010467	gene expression (GO:0010467)	9.48e-07	1.28e-07	4.88e-07	NS	0.031	NS	NS	0.0216	NS	0.00171	NS	NS	1.53e-06	NS	0.00011	1.06e-16	6.5e-13	2.99e-27	NS	NS	0.000158	5.6e-09	3.12e-09	NS	2.19e-06	4.76e-12	0.000667	5.28e-06	NS	0.000427
0034641	cellular nitrogen compound metabolic process (GO:0034641)	0.00205	0.000364	1.17e-06	NS	0.000705	NS	NS	NS	NS	NS	NS	0.016	0.0007	0.0393	3.55e-05	5.04e-18	1.46e-12	2.5e-32	NS	NS	5.13e-05	1.9e-05	3.56e-08	NS	NS	1.65e-09	0.00525	9.71e-10	NS	0.0361
0009768	photosynthesis, light harvesting in photosystem I (GO:0009768)	NS	NS	NS	NS	NS	1.44e-14	NS	NS	0.000368	NS	NS	NS	NS	NS	NS	4.88e-16	5.83e-11	0.00707	NS	NS	6.61e-11	NS	NS	0.00616	NS	2.09e-10	1.32e-06	NS	NS	NS
0019748	secondary metabolic process (GO:0019748)	0.00428	0.000288	0.0251	NS	NS	5.44e-08	0.000782	0.000265	9.39e-05	6.97e-08	NS	0.016	0.00809	NS	NS	0.000157	0.00355	0.0166	6.64e-10	7.71e-05	4.15e-12	1.04e-08	3.6e-07	4.71e-05	1.19e-07	5.27e-06	3.09e-06	1.11e-05	1.68e-08	0.000882
0043687	post-translational protein modification (GO:0043687)	NS	NS	NS	NS	NS	NS	NS	NS	NS	NS	9.31e-13	6.56e-13	3.08e-12	2.52e-09	0.000525	5.24e-07	3.76e-09	8.79e-08	NS	NS	NS	NS	NS	NS	NS	NS	NS	NS	0.00349	NS
0090304	nucleic acid metabolic process (GO:0090304)	9.68e-07	1.43e-05	3.35e-06	NS	0.00144	4.73e-10	NS	1.38e-06	NS	0.0017	NS	NS	2.17e-07	NS	3.2e-05	NS	NS	0.0477	0.0151	NS	2.05e-18	4.97e-08	8.33e-14	0.000949	7.92e-08	NS	NS	NS	0.000136	4.19e-05
0032446	protein modification by small protein conjugation (GO:0032446)	NS	NS	NS	NS	NS	NS	NS	NS	NS	NS	2.9e-14	3.37e-15	2.51e-13	1.31e-10	0.000175	2.85e-06	1.17e-08	9.18e-08	NS	NS	NS	NS	NS	NS	NS	0.0407	NS	NS	0.000831	NS
0016070	RNA metabolic process (GO:0016070)	2.79e-05	0.000474	0.000891	NS	0.0346	2.94e-07	NS	1.75e-05	NS	0.0126	NS	NS	0.000113	NS	0.00307	0.0189	NS	NS	2.41e-06	0.00485	7.41e-14	7.09e-06	4.85e-10	0.0477	1.48e-05	NS	NS	0.00252	1.64e-05	9.81e-07
0006979	response to oxidative stress (GO:0006979)	0.000195	7.66e-05	0.00263	NS	0.00379	1.91e-12	NS	0.000203	0.000435	7.73e-06	0.000936	1.79e-07	1.31e-09	6.25e-05	0.00227	4.91e-08	0.0178	0.00332	2.8e-05	0.0076	2.18e-18	1.52e-06	4.12e-08	2.91e-05	1.7e-09	5.21e-13	1.96e-10	7.71e-14	6.05e-11	1.64e-06
0007623	circadian rhythm (GO:0007623)	NS	NS	NS	NS	NS	3.51e-10	0.0485	1.98e-05	NS	NS	0.000184	0.00363	0.000725	NS	0.00287	8.12e-05	4.33e-07	5.24e-06	0.000281	0.00104	1.08e-08	NS	0.00208	NS	NS	4.11e-11	6.84e-12	9.66e-12	3.58e-05	2.65e-07
0001101	response to acid chemical (GO:0001101)	NS	0.0408	0.0352	NS	NS	2.51e-13	0.000203	5.54e-08	3.13e-06	0.000143	5.01e-06	5.02e-10	5.4e-10	1.24e-05	0.000103	0.000104	0.00366	NS	0.0369	NS	2.48e-14	1.07e-06	2.54e-10	1.07e-07	0.000199	1.56e-12	4.81e-14	3.47e-09	4.73e-08	9.44e-06
0001666	response to hypoxia (GO:0001666)	7.1e-15	1.82e-25	2.5e-17	1.53e-07	1.21e-06	2.23e-22	NS	8e-05	0.0211	0.0293	5.13e-11	5.83e-28	1.71e-34	5.53e-15	2.66e-15	NS	NS	0.031	NS	NS	5.3e-43	3.18e-21	1.33e-22	1.39e-10	6.69e-09	4.43e-12	3.23e-15	7.79e-17	2.51e-10	1.62e-11
0016567	protein ubiquitination (GO:0016567)	NS	NS	0.0348	NS	NS	NS	NS	NS	NS	NS	1.81e-14	5.62e-15	1.5e-13	8.05e-12	4.82e-05	5.09e-06	7.1e-08	7.24e-07	NS	NS	NS	NS	NS	NS	NS	0.0247	NS	NS	0.000118	NS
0048511	rhythmic process (GO:0048511)	NS	NS	NS	NS	NS	3.43e-10	0.048	1.95e-05	NS	NS	0.000183	0.00362	0.000722	NS	0.00285	8.08e-05	4.28e-07	5.2e-06	0.000279	0.00103	1.07e-08	NS	0.00206	NS	NS	4.06e-11	6.73e-12	9.53e-12	3.55e-05	2.59e-07
0050896	response to stimulus (GO:0050896)	1.75e-17	9.42e-26	2.88e-17	0.00151	1.13e-06	1.41e-52	1.72e-10	2.68e-24	1.23e-16	1.99e-12	6.73e-40	1.56e-61	4.23e-77	6.16e-37	7.05e-29	3.8e-24	2.45e-15	9.66e-15	7.34e-17	3.4e-10	3.44e-74	1.47e-37	9.96e-44	1.27e-19	2.45e-20	6.2e-74	1.36e-79	1.79e-93	1.44e-57	5.83e-40
0036211	protein modification process (GO:0036211)	NS	NS	NS	NS	NS	NS	0.0332	NS	0.0165	0.0095	3.49e-16	2.85e-15	4.35e-22	1.02e-12	0.00833	4.5e-07	1.07e-07	4.42e-05	NS	NS	NS	NS	NS	0.025	0.0423	NS	NS	9.16e-05	6.05e-05	NS
0010114	response to red light (GO:0010114)	NS	NS	NS	NS	NS	3.7e-10	7.71e-07	5.79e-09	1.21e-06	0.0244	0.00218	0.00495	0.00249	0.00174	0.0109	0.00161	1.73e-06	0.000939	NS	NS	4.79e-07	2.57e-05	9.36e-06	6.44e-06	NS	5.76e-08	4.68e-11	3.98e-08	9.95e-06	8.26e-05
0016108	tetraterpenoid metabolic process (GO:0016108)	NS	NS	NS	NS	NS	0.000604	0.048	0.0483	NS	NS	NS	NS	NS	NS	NS	1.83e-06	1.35e-05	1.83e-08	2.21e-05	0.0454	0.00734	NS	NS	NS	NS	0.00178	0.00488	9.98e-05	0.00408	NS
0010033	response to organic substance (GO:0010033)	0.000133	4.12e-07	0.00169	NS	NS	1.37e-12	0.00489	3.77e-06	0.00508	0.00161	4.31e-22	2.02e-30	5.49e-35	9.11e-17	5.28e-15	0.002	0.00332	NS	0.000213	NS	1.98e-18	1.08e-10	3.01e-10	0.000879	0.000168	2.39e-25	4.77e-31	3.82e-31	1.48e-21	6.53e-14
1901576	organic substance biosynthetic process (GO:1901576)	NS	0.0379	0.00854	NS	NS	2.57e-07	NS	0.0484	0.00686	NS	NS	0.0428	0.00647	NS	0.00659	1.8e-62	2e-44	2.39e-69	6.31e-22	2.83e-06	0.0371	NS	NS	NS	NS	4.66e-38	3.33e-18	8.05e-30	1.18e-07	NS
0033554	cellular response to stress (GO:0033554)	6.91e-07	4.37e-18	1.91e-10	0.00191	3.71e-06	7.93e-16	NS	8.37e-06	6.88e-05	0.00539	1.61e-09	6.94e-18	2.41e-22	1.46e-12	6.12e-08	2.01e-06	NS	0.00265	0.00973	0.00499	5.49e-25	7.37e-17	2.94e-17	2.77e-09	3.61e-09	1.13e-18	9.36e-17	4.4e-25	4.71e-15	3.43e-11
1901259	chloroplast rRNA processing (GO:1901259)	NS	NS	NS	NS	NS	NS	NS	NS	NS	NS	NS	NS	NS	NS	NS	2.28e-07	4.29e-06	1.4e-06	NS	NS	NS	NS	NS	NS	NS	0.00012	0.00331	0.00236	NS	NS
0006949	syncytium formation (GO:0006949)	NS	NS	NS	NS	NS	0.0313	0.000176	0.00235	NS	NS	NS	NS	NS	NS	NS	0.017	0.00852	0.0124	0.0152	NS	0.0108	0.000299	0.00496	NS	NS	0.0359	0.0173	0.0298	NS	NS
0042793	plastid transcription (GO:0042793)	NS	NS	NS	NS	NS	NS	NS	NS	NS	NS	NS	NS	NS	NS	NS	0.00193	9.31e-06	1.39e-06	NS	NS	NS	NS	NS	NS	NS	0.00476	0.000264	8.15e-05	NS	NS
0044281	small molecule metabolic process (GO:0044281)	NS	0.00141	NS	0.0393	NS	6.38e-08	0.0296	3.72e-08	5.29e-05	3.8e-06	NS	0.0171	1.38e-07	NS	NS	6.74e-31	3.89e-17	4.41e-23	1.33e-22	0.000104	1.93e-10	1.94e-06	1.81e-09	5.31e-08	8.38e-05	1.24e-24	6.79e-19	6.48e-34	3.81e-20	7.58e-06
0008610	lipid biosynthetic process (GO:0008610)	NS	NS	NS	NS	NS	3.13e-05	0.0484	0.00332	NS	NS	NS	NS	NS	NS	NS	7.27e-09	0.000114	7.39e-08	1.49e-05	NS	9.46e-06	NS	0.0026	NS	NS	2.97e-05	0.0105	1.01e-06	0.006	NS
0019684	photosynthesis, light reaction (GO:0019684)	NS	NS	NS	NS	NS	1.38e-18	NS	0.00331	0.000149	NS	0.00148	0.00125	0.000149	NS	NS	6.73e-43	1.41e-39	2.76e-23	4.46e-15	6.29e-05	3.7e-11	NS	NS	0.0215	NS	1.85e-22	8.33e-21	1.94e-09	3.52e-06	NS
0032544	plastid translation (GO:0032544)	NS	NS	NS	NS	NS	NS	NS	NS	NS	NS	NS	NS	NS	NS	NS	5.03e-06	1.19e-05	2.83e-05	NS	NS	NS	NS	NS	NS	NS	0.00358	0.005	0.0111	NS	NS
0016116	carotenoid metabolic process (GO:0016116)	NS	NS	NS	NS	NS	0.000608	0.0486	0.0485	NS	NS	NS	NS	NS	NS	NS	1.84e-06	1.37e-05	1.85e-08	2.24e-05	0.0457	0.00737	NS	NS	NS	NS	0.00179	0.00489	0.0001	0.0041	NS
0071555	cell wall organization (GO:0071555)	NS	NS	NS	NS	NS	0.0311	0.000529	0.00333	NS	NS	NS	NS	NS	NS	NS	NS	NS	NS	NS	NS	0.0389	0.000633	0.0124	NS	NS	NS	NS	0.0246	NS	NS
0006725	cellular aromatic compound metabolic process (GO:0006725)	NS	NS	0.0122	NS	0.00464	NS	NS	NS	NS	NS	NS	NS	0.034	NS	0.0028	0.000161	3.01e-05	6.53e-10	NS	NS	0.0306	NS	0.00348	NS	NS	0.000754	NS	0.019	NS	NS
0043436	oxoacid metabolic process (GO:0043436)	NS	0.000202	0.0485	NS	NS	2.28e-09	NS	5.09e-07	0.00311	0.0006	NS	0.000255	7.51e-08	0.0211	0.0316	9.29e-23	4.19e-11	3.86e-17	9.6e-18	0.00363	1.29e-11	2.96e-06	4.64e-09	8.69e-06	0.000782	3.73e-22	7.57e-17	1.01e-28	1.07e-17	1.8e-05
0044085	cellular component biogenesis (GO:0044085)	NS	NS	NS	NS	NS	NS	NS	NS	NS	NS	NS	NS	NS	NS	NS	2.05e-05	3.01e-05	2.68e-05	NS	NS	NS	NS	NS	NS	NS	5.42e-05	0.0111	0.0295	NS	NS
0043572	plastid fission (GO:0043572)	NS	NS	NS	NS	NS	NS	NS	NS	NS	NS	NS	NS	NS	NS	NS	1.72e-05	3.52e-05	1.39e-06	NS	NS	NS	NS	NS	NS	NS	0.00965	0.00328	0.000521	NS	NS
0009828	plant-type cell wall loosening (GO:0009828)	NS	NS	NS	NS	NS	0.0223	5.93e-05	0.000317	NS	NS	NS	NS	NS	NS	NS	NS	NS	NS	0.0317	NS	0.00111	0.000648	0.00502	NS	NS	NS	NS	NS	NS	NS
0010020	chloroplast fission (GO:0010020)	NS	NS	NS	NS	NS	NS	NS	NS	NS	NS	NS	NS	NS	NS	NS	1.73e-05	3.55e-05	1.41e-06	NS	NS	NS	NS	NS	NS	NS	0.00968	0.00332	0.000523	NS	NS
0042221	response to chemical (GO:0042221)	3.07e-15	4.14e-23	1.35e-15	5.4e-06	3.26e-08	1.19e-35	2.78e-08	1.52e-18	2.63e-10	1.03e-11	8.03e-30	1.5e-57	8.24e-64	9.83e-31	1.92e-29	1.61e-09	0.000453	0.028	2.33e-06	0.0183	4.67e-55	4.72e-32	2.13e-36	2.77e-17	2.99e-21	8.8e-44	2.61e-54	8.54e-54	2.44e-37	1.11e-27
0046483	heterocycle metabolic process (GO:0046483)	0.0104	0.023	0.000229	NS	0.00055	NS	NS	NS	NS	NS	NS	NS	0.0136	NS	0.000648	0.000667	8.54e-05	7.4e-10	NS	NS	0.000102	0.0112	5.25e-05	NS	NS	0.00362	NS	0.0369	NS	NS
0046501	protoporphyrinogen IX metabolic process (GO:0046501)	NS	NS	NS	NS	NS	NS	NS	NS	NS	NS	NS	NS	NS	NS	NS	2.56e-05	0.000103	0.00135	NS	NS	NS	NS	NS	NS	NS	0.00475	0.00195	0.0182	NS	NS
0006082	organic acid metabolic process (GO:0006082)	NS	0.0002	0.0485	NS	NS	2.31e-09	NS	5.03e-07	0.00306	0.000603	NS	0.00032	4.22e-08	0.0212	0.0318	9.62e-23	5.79e-11	4.04e-17	9.5e-18	0.00458	1.33e-11	2.95e-06	4.6e-09	8.6e-06	0.000777	5.48e-22	7.94e-17	6.71e-29	1.1e-17	1.75e-05
0010035	response to inorganic substance (GO:0010035)	0.00291	2.68e-05	4.54e-05	0.0295	0.00395	9.57e-15	2.62e-05	1.12e-11	1.64e-05	2.18e-05	2.65e-06	3.52e-13	8.79e-15	4.04e-08	2.34e-09	2.21e-06	0.00386	NS	0.00858	0.0356	5.95e-19	2.3e-11	8.41e-18	1.17e-08	5.32e-09	7.19e-15	1.03e-16	3.21e-15	3.79e-11	2.62e-11
0009900	dehiscence (GO:0009900)	NS	NS	NS	NS	NS	0.0314	0.0385	0.00642	NS	NS	NS	NS	NS	NS	NS	NS	NS	NS	NS	NS	NS	NS	0.027	NS	NS	NS	NS	NS	NS	NS
0009827	plant-type cell wall modification (GO:0009827)	NS	NS	NS	NS	NS	0.00281	2.76e-05	0.000101	NS	NS	NS	NS	NS	NS	NS	NS	NS	NS	NS	NS	0.0017	0.00141	0.00238	NS	NS	NS	NS	NS	NS	NS
0006950	response to stress (GO:0006950)	3.59e-15	4.05e-28	1.38e-17	0.00056	2.76e-10	9.21e-40	0.00155	4.52e-13	1.7e-12	6.02e-08	3.85e-28	2.04e-48	1.52e-61	1.73e-25	2.71e-18	3.91e-20	9.84e-10	6.75e-07	6.29e-12	6.74e-08	1.8e-59	5.69e-30	1.25e-33	7.36e-17	3.86e-20	9.29e-57	5.6e-59	2.48e-65	2.78e-40	8.67e-28
0070482	response to oxygen levels (GO:0070482)	1.04e-14	2.02e-25	3.03e-17	7.51e-08	1.35e-06	7.68e-22	NS	0.000111	0.0246	0.0332	2.3e-11	4.2e-29	2.19e-35	1.01e-15	1.55e-15	NS	NS	0.0433	NS	NS	6.65e-42	7.02e-21	4.17e-22	1.77e-10	9.78e-09	3.3e-12	2.62e-16	6.8e-18	1.01e-10	1.44e-11
0006782	protoporphyrinogen IX biosynthetic process (GO:0006782)	NS	NS	NS	NS	NS	NS	NS	NS	NS	NS	NS	NS	NS	NS	NS	2.6e-05	0.000106	0.00136	NS	NS	NS	NS	NS	NS	NS	0.00477	0.00196	0.0184	NS	NS
0019752	carboxylic acid metabolic process (GO:0019752)	NS	0.00541	NS	NS	NS	1.57e-07	NS	3.51e-05	NS	0.00225	NS	0.0143	2.27e-05	NS	0.0405	3.17e-23	5.64e-11	1.93e-17	5.56e-16	0.0176	4.59e-08	0.000738	4.52e-06	0.0102	0.0156	4.46e-20	6.2e-14	2.5e-25	1.7e-14	8.83e-05
0036293	response to decreased oxygen levels (GO:0036293)	1.07e-14	2.07e-25	2.59e-17	9.92e-08	1.3e-06	5.22e-22	NS	0.0001	0.0235	0.032	3.82e-11	1.03e-28	3.92e-35	2.84e-15	4.44e-15	NS	NS	0.0425	NS	NS	2.99e-42	5.58e-21	2.95e-22	1.71e-10	8.77e-09	4.46e-12	3.91e-16	9.85e-18	2.88e-10	2.93e-11
0006790	sulfur compound metabolic process (GO:0006790)	0.00128	9.32e-06	0.0172	0.0476	NS	0.00137	NS	8.21e-05	0.000338	8.16e-05	NS	NS	0.000232	NS	NS	0.000491	0.0284	NS	2.35e-07	NS	5.88e-08	5.55e-08	9.03e-08	4.99e-07	1.27e-06	0.00107	0.00119	9.7e-06	4.86e-06	0.0128
1901700	response to oxygen-containing compound (GO:1901700)	5.52e-06	9.21e-09	1.15e-06	0.0058	0.000356	7.91e-19	0.000682	1.8e-07	1.71e-05	8.7e-07	5.58e-19	1.25e-31	3.38e-35	1.32e-16	4.19e-16	3.15e-08	1.14e-06	0.00197	2.35e-07	0.0103	3.35e-26	2.99e-13	2.32e-15	2.78e-09	1.08e-11	2.89e-31	1.08e-39	5.26e-36	8.14e-26	6.67e-18
0051716	cellular response to stimulus (GO:0051716)	3.21e-07	1.89e-18	5.98e-09	NS	0.00408	8.04e-12	0.0477	9.18e-05	0.00656	0.0442	5.37e-19	9.48e-26	2.19e-37	1.28e-19	6.49e-10	1.05e-05	0.0316	0.000641	0.00135	0.00732	3.98e-21	5.88e-19	2.15e-14	1.62e-05	1.96e-05	8.6e-27	2.68e-24	1.24e-38	1.07e-22	1.36e-12
0009628	response to abiotic stimulus (GO:0009628)	4.46e-05	9.37e-09	1.86e-06	0.00828	0.00608	1.03e-71	1.59e-14	4.61e-37	3.83e-25	6.85e-09	4.64e-23	5.28e-35	1.08e-36	2.06e-20	1.74e-20	5.05e-36	1.79e-26	8.61e-21	1.81e-18	6.72e-13	7.49e-71	5.12e-24	1.24e-40	2e-25	2.75e-12	2.04e-70	9.73e-72	4.54e-67	5.57e-43	5.37e-36
0009605	response to external stimulus (GO:0009605)	1.02e-14	6.18e-20	4.44e-14	NS	0.000174	1.29e-10	NS	0.00729	NS	0.00258	1.3e-19	2.22e-31	7.12e-47	9.88e-18	4.6e-12	0.000687	0.00846	NS	NS	0.0322	2.8e-27	9.42e-16	5.15e-16	0.000934	2.29e-08	2.5e-24	8.16e-31	1.38e-37	7.85e-18	3.05e-13
0045229	external encapsulating structure organization (GO:0045229)	NS	NS	NS	NS	NS	0.0354	0.000323	0.00112	NS	NS	NS	NS	NS	NS	NS	NS	NS	NS	NS	NS	0.0392	0.00011	0.00547	NS	NS	NS	NS	NS	NS	NS
0031668	cellular response to extracellular stimulus (GO:0031668)	1.89e-06	9.49e-07	2.3e-06	NS	3.05e-07	NS	NS	NS	0.00861	0.000695	0.00106	3.74e-05	5.92e-08	0.000325	2.52e-05	NS	NS	NS	NS	NS	7.58e-06	3.08e-06	7.13e-08	0.000569	1.51e-11	0.000137	2.42e-05	5.58e-08	0.000942	4.07e-05
0071496	cellular response to external stimulus (GO:0071496)	3.71e-06	1.53e-06	3.93e-06	NS	3.67e-07	NS	NS	NS	0.0106	0.000886	0.00194	8.57e-05	8.81e-08	0.000741	4.32e-05	NS	NS	NS	NS	NS	1.92e-05	5.25e-06	1.62e-07	0.000829	2.77e-11	0.000133	2.25e-05	1.36e-08	0.0012	0.000101
0009723	response to ethylene (GO:0009723)	6.85e-05	0.0191	0.00591	NS	NS	NS	NS	NS	NS	NS	7.48e-06	6.54e-11	2.59e-13	1.21e-06	0.00336	NS	NS	NS	NS	NS	0.000821	0.0308	0.0118	NS	NS	0.000905	3.19e-05	7.38e-07	0.000371	NS
0007154	cell communication (GO:0007154)	0.00478	1.92e-06	0.0116	NS	NS	NS	NS	NS	NS	NS	3.93e-11	1.23e-10	2.44e-20	1.3e-08	0.000864	NS	NS	NS	NS	NS	0.000399	2.12e-06	0.00104	NS	NS	2.53e-09	1.94e-08	6.64e-17	5.17e-08	0.000375
0042545	cell wall modification (GO:0042545)	NS	NS	NS	NS	NS	0.00339	0.000269	2.82e-05	NS	NS	NS	NS	NS	NS	NS	NS	NS	NS	NS	NS	0.00118	0.000363	0.000329	NS	NS	NS	NS	NS	NS	NS
0071554	cell wall organization or biogenesis (GO:0071554)	NS	NS	NS	NS	NS	0.0163	0.000439	0.00109	NS	NS	NS	NS	NS	NS	NS	NS	NS	NS	NS	NS	0.0082	8.83e-05	0.00168	NS	NS	NS	NS	NS	NS	NS
0042343	indole glucosinolate metabolic process (GO:0042343)	0.000109	4.71e-06	0.00176	NS	NS	NS	NS	NS	NS	NS	NS	0.0307	0.00043	NS	NS	NS	NS	NS	NS	NS	0.000283	9.29e-05	0.0144	NS	NS	NS	NS	0.0154	NS	NS
0071840	cellular component organization or biogenesis (GO:0071840)	0.035	0.025	0.0169	NS	NS	NS	NS	NS	NS	NS	NS	NS	NS	NS	NS	7.82e-13	3.56e-13	8.63e-22	0.0266	2.16e-05	NS	NS	NS	NS	NS	1e-12	4.09e-10	1.3e-11	NS	NS
0034605	cellular response to heat (GO:0034605)	NS	NS	NS	NS	NS	0.00644	0.0368	0.000735	NS	NS	NS	NS	NS	NS	NS	0.033	NS	0.0412	NS	NS	NS	NS	0.0052	NS	NS	NS	NS	0.0141	NS	NS
0006996	organelle organization (GO:0006996)	0.0047	0.00124	0.000408	NS	NS	NS	NS	NS	NS	NS	NS	NS	NS	NS	NS	1.52e-15	1.22e-16	7.67e-26	5.47e-05	2.58e-10	NS	NS	NS	NS	NS	3.04e-10	9.21e-12	1.25e-13	NS	0.00346
1901698	response to nitrogen compound (GO:1901698)	NS	0.0465	NS	NS	NS	NS	NS	0.0385	NS	NS	0.00806	NS	0.00348	0.0234	NS	NS	NS	NS	NS	NS	NS	0.0063	0.0349	NS	NS	0.0103	NS	NS	0.0134	NS
0006721	terpenoid metabolic process (GO:0006721)	NS	NS	NS	NS	NS	0.0209	0.0292	NS	NS	NS	NS	NS	NS	NS	NS	NS	NS	NS	NS	NS	0.00138	NS	0.0285	NS	NS	NS	NS	NS	NS	NS
0010817	regulation of hormone levels (GO:0010817)	NS	NS	NS	NS	NS	0.0243	NS	0.0303	NS	NS	0.000197	0.0134	0.0152	NS	NS	NS	NS	NS	NS	NS	0.0233	NS	0.0284	NS	NS	0.0037	0.00119	0.0102	0.0419	NS
0033993	response to lipid (GO:0033993)	0.0327	0.0021	0.00164	NS	NS	3.31e-07	NS	0.0207	NS	NS	2.1e-14	3.46e-22	7.21e-22	9.65e-11	1.47e-11	0.0138	0.0212	NS	0.00355	NS	3.22e-10	0.00119	2.64e-06	NS	0.00879	3.31e-17	2e-22	3.33e-19	4.86e-14	1.55e-12
0009725	response to hormone (GO:0009725)	0.00331	0.00164	0.00594	NS	NS	1.29e-07	NS	0.000469	NS	NS	4.72e-18	2.5e-25	5.82e-25	3.48e-12	2.26e-14	NS	NS	NS	NS	NS	7.1e-12	1.81e-05	1.99e-07	NS	0.0415	2.28e-18	1.03e-22	8.84e-21	6.56e-13	1.39e-12
0006139	nucleobase-containing compound metabolic process (GO:0006139)	0.000171	1.16e-05	2.31e-05	NS	5.96e-05	2.9e-06	NS	0.013	NS	NS	NS	0.0384	9.57e-05	NS	0.000336	NS	NS	4.37e-05	NS	NS	7.39e-12	2.46e-06	3.52e-08	NS	0.0152	NS	NS	NS	NS	0.00213
0044282	small molecule catabolic process (GO:0044282)	NS	NS	0.0491	NS	NS	0.044	NS	0.00772	NS	NS	0.000107	4.73e-11	4.34e-10	2.54e-08	7.58e-06	NS	NS	NS	0.0464	NS	0.000427	NS	4.3e-05	0.0403	NS	6.49e-05	1.83e-08	7.44e-09	1.89e-10	3.9e-05
0009312	oligosaccharide biosynthetic process (GO:0009312)	NS	0.0344	NS	NS	NS	0.0112	0.0126	NS	0.0373	NS	NS	NS	NS	NS	NS	0.000157	0.0252	0.00152	0.0033	NS	0.000833	2.2e-05	0.0025	0.00161	NS	8.19e-05	0.00198	0.000246	0.00209	0.00879
0046351	disaccharide biosynthetic process (GO:0046351)	NS	0.0234	NS	NS	NS	0.00551	0.00805	NS	0.0286	NS	NS	NS	NS	NS	NS	3.71e-05	0.0114	0.000479	0.00148	NS	0.000255	8.42e-06	0.00499	0.000892	NS	3.93e-05	0.0166	0.000506	0.000638	0.00375
0048583	regulation of response to stimulus (GO:0048583)	NS	0.00355	0.0313	NS	NS	1e-07	NS	0.00412	NS	NS	1.19e-15	4.98e-22	5.87e-25	3.76e-10	4.72e-06	NS	NS	NS	NS	NS	3e-08	0.000185	1.34e-05	NS	NS	2.27e-11	1.55e-16	5.42e-17	1.49e-08	1.01e-05
0006412	translation (GO:0006412)	NS	NS	0.0489	NS	NS	NS	NS	NS	NS	NS	5.95e-08	1.09e-05	5.21e-08	0.000184	0.00166	6.01e-40	8.73e-22	1.39e-50	0.0159	NS	NS	0.000184	0.000392	NS	NS	5.71e-13	1.11e-05	1.42e-18	NS	NS
0031667	response to nutrient levels (GO:0031667)	2.62e-09	2.39e-09	4.63e-10	0.0288	1.21e-09	NS	NS	NS	NS	NS	3.48e-06	4.69e-08	8.49e-10	4.54e-07	4.01e-09	NS	NS	0.0399	NS	NS	7.02e-07	1.5e-08	2.96e-10	0.000262	4.53e-11	8.43e-08	4.64e-09	5.28e-12	1.59e-07	1.24e-10
0006807	nitrogen compound metabolic process (GO:0006807)	NS	NS	0.0133	NS	NS	NS	NS	NS	NS	NS	2.93e-06	0.000582	4.22e-05	0.000618	NS	9.98e-14	6.63e-08	8.57e-21	0.0041	NS	NS	0.0337	0.0107	NS	NS	2.02e-22	4.38e-13	8.01e-27	1.8e-07	NS
1901360	organic cyclic compound metabolic process (GO:1901360)	NS	NS	0.00838	NS	0.000468	NS	NS	NS	NS	NS	NS	NS	NS	NS	0.00163	1.63e-06	5.76e-07	1.3e-11	0.0162	NS	NS	NS	0.0414	NS	NS	2.58e-05	0.0253	0.00139	NS	NS
0110102	ribulose bisphosphate carboxylase complex assembly (GO:0110102)	NS	NS	NS	NS	NS	NS	NS	NS	NS	NS	NS	NS	NS	NS	NS	0.000216	0.000108	0.000164	NS	NS	NS	NS	NS	NS	NS	0.00937	0.00488	0.00779	NS	NS
1901657	glycosyl compound metabolic process (GO:1901657)	0.0408	0.00535	NS	0.0449	NS	NS	NS	NS	NS	NS	NS	0.0146	0.0103	NS	NS	0.0189	0.0357	NS	6.51e-05	NS	0.0269	0.00714	0.0216	0.00524	NS	0.00104	5.02e-05	0.000689	6.25e-06	NS
0031425	chloroplast RNA processing (GO:0031425)	NS	NS	NS	NS	NS	NS	NS	NS	NS	NS	NS	NS	NS	NS	NS	0.00847	0.000138	1.15e-06	NS	NS	NS	NS	NS	NS	NS	NS	0.0115	0.00278	NS	NS
0019760	glucosinolate metabolic process (GO:0019760)	NS	0.00258	NS	0.0407	NS	NS	NS	NS	NS	NS	NS	0.0121	0.00454	NS	NS	0.0364	0.033	NS	0.000109	NS	0.00524	0.00191	0.0058	0.00185	NS	0.00187	3.76e-05	0.000706	5.4e-05	NS
0042594	response to starvation (GO:0042594)	2.99e-08	2.69e-07	3.28e-08	NS	1.7e-08	NS	NS	NS	NS	NS	0.000144	0.000128	8.28e-06	0.000982	5.08e-05	NS	NS	NS	NS	0.0276	4.25e-06	8.61e-07	9.45e-08	0.0241	3.6e-09	0.000133	4.4e-05	6.75e-07	2.23e-05	1.08e-07
1900865	chloroplast RNA modification (GO:1900865)	NS	NS	NS	NS	NS	NS	NS	NS	NS	NS	NS	NS	NS	NS	NS	0.0171	0.000195	0.00222	NS	NS	NS	NS	NS	NS	NS	NS	0.0174	NS	NS	NS
0019757	glycosinolate metabolic process (GO:0019757)	NS	0.00254	NS	0.0389	NS	NS	NS	NS	NS	NS	NS	0.0121	0.00453	NS	NS	0.0364	0.0329	NS	0.000108	NS	0.00522	0.00189	0.00577	0.00182	NS	0.00187	3.74e-05	0.000703	5.36e-05	NS
0016143	S-glycoside metabolic process (GO:0016143)	NS	0.00261	NS	0.0428	NS	NS	NS	NS	NS	NS	NS	0.0122	0.00456	NS	NS	0.0365	0.0331	NS	0.00011	NS	0.00527	0.00193	0.00584	0.00189	NS	0.00188	3.78e-05	0.000708	5.44e-05	NS
0006260	DNA replication (GO:0006260)	NS	NS	NS	NS	NS	NS	NS	NS	NS	NS	NS	0.0127	0.0123	0.0148	NS	0.0343	0.000204	2.71e-07	NS	NS	0.00993	NS	0.0274	NS	NS	NS	NS	NS	NS	NS
0043043	peptide biosynthetic process (GO:0043043)	NS	NS	0.0482	NS	NS	NS	NS	NS	NS	NS	1.12e-07	4.78e-05	9.98e-07	0.000922	0.00382	2.87e-39	3.52e-21	8.93e-50	0.0219	NS	NS	0.000187	0.000393	NS	NS	7.96e-13	7.53e-06	5.09e-19	NS	NS
0030091	protein repair (GO:0030091)	NS	NS	NS	NS	NS	NS	NS	NS	NS	NS	NS	NS	NS	NS	NS	0.000112	0.000225	0.00947	NS	NS	NS	NS	NS	NS	NS	0.00261	0.000743	0.0247	NS	NS
0006970	response to osmotic stress (GO:0006970)	NS	NS	NS	NS	NS	4.24e-07	0.05	0.0021	0.000782	0.00461	3.29e-07	4.68e-11	5.08e-10	1.43e-05	0.00284	NS	NS	NS	0.0403	NS	9.73e-08	0.00456	0.00163	0.0424	0.0459	6.65e-08	5.34e-12	2.05e-08	6.41e-08	0.000876
0104004	cellular response to environmental stimulus (GO:0104004)	NS	NS	NS	NS	NS	9.76e-09	0.000176	3.72e-06	2.52e-05	8.09e-06	0.0271	0.0494	0.00285	0.0313	NS	2.31e-07	4.33e-08	2.26e-05	0.00404	0.00052	4.07e-06	0.0114	0.000367	0.000384	0.000427	1.36e-10	1.69e-10	7.02e-10	1.52e-05	3.95e-05
0009414	response to water deprivation (GO:0009414)	NS	NS	NS	NS	NS	3.25e-15	6.21e-05	3.68e-08	6.86e-07	4.53e-05	4.21e-05	6.86e-10	4e-10	0.000111	0.000191	0.000276	0.0042	NS	0.0112	NS	2.63e-15	1.96e-06	4.88e-10	1.29e-07	0.000117	8.02e-11	7.66e-14	1.7e-09	1.02e-07	3.47e-06
0009637	response to blue light (GO:0009637)	NS	NS	NS	NS	NS	4.61e-06	0.0003	3.71e-06	0.000506	NS	0.00144	0.00158	0.00313	0.0314	NS	0.00031	0.000301	0.000457	0.000339	0.00887	0.000392	0.0152	0.0021	0.00772	NS	2.22e-09	5.9e-09	2.55e-08	1.77e-06	0.000203
0009657	plastid organization (GO:0009657)	NS	NS	NS	NS	NS	5.56e-07	NS	0.00057	0.00457	NS	0.0176	NS	0.00689	0.0223	NS	6.68e-33	4.03e-31	5.74e-34	1.02e-08	3.13e-07	0.0136	NS	NS	NS	NS	1.43e-15	5.27e-17	1.61e-15	0.0434	0.0395
0015979	photosynthesis (GO:0015979)	NS	NS	NS	NS	NS	1.26e-23	NS	0.00146	0.00283	NS	0.00246	0.00129	2.71e-05	0.0188	NS	3.33e-55	2.47e-49	3.89e-32	9.37e-17	0.000429	3.46e-14	NS	NS	NS	NS	4.38e-30	1.71e-26	4.56e-13	5.36e-06	NS
0043207	response to external biotic stimulus (GO:0043207)	1.82e-07	7.55e-15	4.24e-07	NS	NS	1.09e-10	NS	0.036	NS	NS	6.68e-14	3.09e-22	3.98e-35	8.12e-12	3.51e-06	0.00296	NS	NS	NS	NS	3.11e-20	1.96e-11	3.87e-09	NS	NS	6.6e-18	9.25e-21	4.39e-26	9.52e-12	1.75e-07
0052482	defense response by cell wall thickening (GO:0052482)	NS	0.0113	NS	NS	NS	NS	NS	NS	NS	NS	0.0202	0.0123	0.000614	NS	NS	NS	NS	NS	NS	NS	NS	0.0412	NS	NS	NS	NS	0.0266	0.0032	0.0235	NS
1901615	organic hydroxy compound metabolic process (GO:1901615)	NS	NS	NS	NS	NS	0.000342	0.0122	1.75e-06	0.00045	0.025	NS	NS	0.0342	NS	NS	0.00421	0.00149	NS	0.000261	NS	4.52e-05	0.0034	1.13e-05	0.0325	NS	0.00362	0.000148	0.00125	1.86e-05	NS
0065003	protein-containing complex assembly (GO:0065003)	NS	NS	NS	NS	NS	NS	NS	NS	NS	NS	NS	NS	NS	NS	NS	9.72e-07	0.000228	0.000579	NS	NS	NS	NS	NS	NS	NS	0.0031	0.0454	NS	NS	NS
0072596	establishment of protein localization to chloroplast (GO:0072596)	NS	NS	NS	NS	NS	NS	NS	NS	NS	NS	NS	NS	NS	NS	NS	2.72e-07	0.000275	1.68e-05	NS	NS	NS	NS	NS	NS	NS	0.000171	NS	0.0382	NS	NS
0009314	response to radiation (GO:0009314)	NS	NS	NS	NS	NS	8.36e-34	6.09e-11	3.36e-25	2.46e-13	0.000128	5.14e-07	2.63e-05	0.000195	0.000182	1.32e-06	2e-34	6.17e-28	3.65e-24	1.13e-20	9.81e-15	2.09e-24	1.14e-06	3.28e-15	5.17e-09	0.00455	5.07e-45	1.06e-34	6.83e-30	2.01e-24	1.47e-22
0010218	response to far red light (GO:0010218)	NS	NS	NS	NS	NS	1.66e-06	3.98e-06	2.65e-08	7.71e-07	0.0051	8.48e-06	3.79e-05	3.79e-05	0.000133	0.000614	NS	0.0026	NS	NS	NS	3.22e-06	3.2e-06	2.43e-08	9.18e-08	NS	1.21e-08	4.19e-10	1.06e-06	4.77e-07	0.000113
0009058	biosynthetic process (GO:0009058)	NS	NS	NS	NS	NS	1.96e-07	NS	NS	0.0112	NS	NS	NS	0.0411	NS	0.0201	2.03e-62	2.6e-44	1.24e-68	2.46e-22	1.33e-06	0.0074	NS	NS	NS	NS	5.45e-39	2.74e-19	4.36e-31	1.48e-08	NS
0043604	amide biosynthetic process (GO:0043604)	NS	NS	NS	NS	NS	NS	NS	0.0358	NS	NS	4.73e-07	8.1e-05	0.000118	0.00668	0.00559	2.41e-36	1.09e-20	9.38e-49	0.00876	NS	NS	0.000225	0.000273	NS	NS	1.64e-11	1.43e-05	3.29e-20	NS	0.0494
0022613	ribonucleoprotein complex biogenesis (GO:0022613)	NS	NS	NS	NS	NS	NS	NS	0.0249	NS	NS	NS	NS	0.000318	NS	NS	NS	NS	0.0174	NS	NS	0.00787	NS	0.000842	NS	NS	NS	NS	NS	NS	0.0053
0044419	biological process involved in interspecies interaction between organisms (GO:0044419)	1.56e-07	1.13e-14	7.22e-07	NS	NS	1.27e-10	NS	0.0378	NS	NS	4.65e-14	1.25e-22	4.67e-35	1.94e-12	3e-06	0.00199	NS	NS	NS	NS	2.83e-20	3.81e-11	6.89e-09	NS	NS	2.22e-18	4.03e-21	2.77e-26	3.15e-12	8.36e-08
0009642	response to light intensity (GO:0009642)	NS	NS	NS	NS	NS	1.15e-20	NS	1.32e-07	2.92e-06	NS	0.0437	0.0194	NS	0.000893	1.34e-05	9.96e-13	2.46e-10	5.64e-06	6.39e-06	0.0069	1.41e-16	NS	7.39e-06	2.87e-05	NS	1.68e-15	1.35e-13	3.72e-08	2.19e-10	5.28e-09
0071214	cellular response to abiotic stimulus (GO:0071214)	NS	NS	NS	NS	NS	9.57e-09	0.000171	3.64e-06	2.42e-05	7.81e-06	0.027	0.0493	0.00284	0.0311	NS	2.29e-07	4.28e-08	2.25e-05	0.00402	0.000513	4.03e-06	0.0114	0.000363	0.000375	0.000419	1.34e-10	1.66e-10	6.95e-10	1.51e-05	3.9e-05
0032787	monocarboxylic acid metabolic process (GO:0032787)	NS	NS	NS	NS	NS	2.59e-06	NS	0.00168	NS	6.44e-05	NS	NS	0.0016	NS	NS	3.02e-11	2.16e-08	1.51e-12	4.91e-09	0.0037	3.55e-05	0.00367	0.00148	NS	0.0085	3.97e-10	8.28e-10	1.85e-17	1.82e-07	0.00555
0009607	response to biotic stimulus (GO:0009607)	1.75e-07	7.56e-15	4.16e-07	NS	NS	1.56e-10	NS	0.036	NS	NS	4.97e-14	1.41e-22	3.41e-35	7.85e-12	2.52e-06	0.00302	NS	NS	NS	NS	4.49e-20	1.99e-11	3.95e-09	NS	NS	5.53e-18	7.93e-21	3.72e-26	1.34e-11	1.33e-07
34660	ncRNA metabolic process (GO:0034660)	NS	NS	NS	NS	NS	0.0235	NS	0.0174	NS	NS	NS	NS	7.44e-05	NS	0.00861	NS	NS	0.0308	NS	NS	0.000418	NS	0.005	NS	NS	NS	NS	NS	0.0128	0.00117
9409	response to cold (GO:0009409)	NS	NS	NS	NS	NS	4.69e-21	0.00235	1.62e-07	6.26e-09	0.024	NS	0.0208	0.0391	NS	NS	7.3e-14	1.86e-06	2.89e-06	0.000261	0.0396	1.12e-15	NS	7.31e-05	2.78e-05	NS	2.25e-11	1.91e-09	5.35e-09	2.2e-05	0.00129
71704	organic substance metabolic process (GO:0071704)	NS	NS	NS	NS	NS	4.56e-05	NS	0.000217	0.0295	NS	5.34e-08	4.55e-06	2.59e-08	5.99e-05	NS	2.03e-33	2.37e-21	1.67e-42	2.11e-15	2.12e-05	0.000248	NS	NS	NS	NS	1.32e-43	9.23e-29	2.38e-51	9.4e-20	0.000591
6629	lipid metabolic process (GO:0006629)	NS	NS	NS	NS	NS	2.84e-05	NS	0.0331	NS	0.038	NS	NS	1.53e-05	NS	NS	1.63e-05	0.00745	3e-05	0.000714	NS	7.16e-08	0.00649	0.000737	NS	NS	2.24e-07	4.31e-05	1.68e-12	5.43e-05	NS
10027	thylakoid membrane organization (GO:0010027)	NS	NS	NS	NS	NS	NS	NS	NS	NS	NS	NS	NS	NS	NS	NS	0.000369	0.000276	6.26e-05	NS	NS	NS	NS	NS	NS	NS	NS	NS	0.0159	NS	NS
9639	response to red or far red light (GO:0009639)	NS	NS	NS	NS	NS	2.89e-11	2.63e-08	5.29e-11	5.95e-09	0.00222	0.000113	0.000125	0.000116	0.000807	0.000255	0.000111	3.52e-07	0.00072	2.54e-05	0.00033	4.15e-07	7.55e-05	2.48e-07	3.91e-08	NS	3.38e-11	9.98e-14	9.57e-10	9.48e-10	4.23e-09
9416	response to light stimulus (GO:0009416)	NS	NS	NS	NS	NS	1.68e-34	3.83e-11	7.3e-26	1.27e-13	8.71e-05	1.79e-07	7.49e-06	5.22e-05	6.82e-05	4.92e-07	7.89e-35	4.3e-28	3.49e-23	1.23e-20	4.75e-14	2.1e-25	6.47e-07	5.17e-16	2.55e-09	0.00326	2.33e-46	5.63e-36	5.05e-30	7.58e-25	1.95e-22
9719	response to endogenous stimulus (GO:0009719)	0.00127	0.000528	0.00675	NS	NS	2.48e-07	NS	0.00055	NS	NS	6.71e-18	9.97e-25	1.04e-24	6.03e-12	4.6e-14	0.046	NS	NS	NS	NS	4.4e-12	1.05e-05	2e-07	NS	NS	1.27e-18	7.73e-23	4.8e-21	1.23e-12	4.41e-12
51707	response to other organism (GO:0051707)	1.71e-07	7.08e-15	4.03e-07	NS	NS	1.06e-10	NS	0.0359	NS	NS	6.4e-14	2.94e-22	3.65e-35	7.75e-12	3.41e-06	0.00295	NS	NS	NS	NS	2.95e-20	1.85e-11	3.76e-09	NS	NS	6.43e-18	8.88e-21	4.23e-26	9.19e-12	1.7e-07
71489	cellular response to red or far red light (GO:0071489)	NS	NS	NS	NS	NS	0.000487	6.64e-05	0.000125	0.000189	0.000756	NS	NS	0.0276	NS	NS	0.0154	0.00448	NS	0.00158	0.00895	0.00571	0.00801	0.0189	0.00803	0.0195	0.000118	0.000434	0.000251	3.1e-05	0.000873
9889	regulation of biosynthetic process (GO:0009889)	NS	NS	NS	NS	NS	0.000684	NS	0.0392	NS	NS	1.53e-08	0.00025	0.00596	0.00154	0.000497	NS	NS	NS	NS	NS	0.00223	NS	NS	NS	NS	0.00857	0.00494	0.00736	NS	0.0373
46907	intracellular transport (GO:0046907)	NS	NS	NS	NS	NS	0.0437	NS	0.00776	NS	NS	1.72e-08	0.0134	7.25e-05	NS	NS	0.0154	0.0085	7.96e-05	0.000551	NS	0.00191	0.00368	0.000555	NS	NS	NS	NS	NS	NS	NS
8152	metabolic process (GO:0008152)	NS	NS	NS	NS	NS	8.78e-11	NS	3.48e-05	0.0037	NS	5.39e-09	2.43e-07	7.17e-10	2.85e-06	NS	1.72e-46	1.3e-30	4.46e-48	1.29e-18	9.03e-06	7.51e-10	0.0337	0.00317	NS	NS	8.8e-57	8.42e-39	6.98e-59	1.55e-24	2.66e-05
9987	cellular process (GO:0009987)	NS	NS	NS	NS	NS	5.79e-19	NS	3.32e-07	0.000146	0.00961	2.59e-14	9.07e-12	7.86e-15	4.21e-09	NS	2.21e-64	1.73e-42	4.29e-68	2.02e-18	5.34e-14	8.27e-18	0.000387	9.46e-06	0.015	0.0305	1.06e-81	1.56e-56	1.42e-84	3.78e-28	3.04e-08
6261	DNA-templated DNA replication (GO:0006261)	NS	NS	NS	NS	NS	NS	NS	NS	NS	NS	NS	0.0402	0.0135	0.0387	NS	0.0371	0.000348	1.21e-06	NS	NS	0.0308	NS	NS	NS	NS	NS	NS	NS	NS	NS
22607	cellular component assembly (GO:0022607)	NS	NS	NS	NS	NS	NS	NS	NS	NS	NS	NS	NS	NS	NS	NS	5.72e-05	0.000467	0.00051	NS	NS	NS	NS	NS	NS	NS	6.07e-05	0.00624	0.00665	NS	NS
10411	xyloglucan metabolic process (GO:0010411)	NS	NS	NS	NS	NS	0.0439	NS	0.0335	NS	NS	NS	NS	NS	NS	0.00833	NS	NS	NS	NS	NS	0.0155	NS	0.0127	NS	NS	NS	NS	NS	NS	0.00856
65007	biological regulation (GO:0065007)	NS	NS	NS	NS	NS	8.58e-06	NS	0.0119	NS	NS	5.3e-25	7.37e-20	2.01e-22	1.06e-10	2.02e-08	NS	NS	NS	NS	NS	1.94e-07	NS	0.0036	NS	NS	1.47e-12	1.54e-15	2.55e-20	1.29e-07	8.3e-07
9404	toxin metabolic process (GO:0009404)	NS	0.0307	NS	NS	NS	NS	NS	NS	NS	0.00114	NS	NS	NS	NS	NS	NS	NS	NS	NS	NS	0.00163	0.00329	NS	NS	0.00594	0.0301	NS	NS	NS	NS
71396	cellular response to lipid (GO:0071396)	NS	NS	0.00602	NS	NS	NS	NS	NS	NS	NS	1.13e-07	4.22e-10	2.76e-10	8.84e-06	2e-06	NS	NS	NS	NS	NS	0.042	NS	0.0263	NS	NS	7.21e-05	8.76e-06	1.24e-05	0.000277	1.76e-05
16036	cellular response to phosphate starvation (GO:0016036)	4.34e-05	0.0014	0.000535	NS	1.93e-05	NS	NS	NS	NS	NS	NS	0.00241	0.00467	NS	NS	NS	NS	NS	NS	NS	0.000536	0.00192	0.00206	NS	4.68e-05	NS	0.00718	0.00432	NS	NS
9267	cellular response to starvation (GO:0009267)	6.12e-07	1.61e-06	8.65e-07	NS	3.87e-07	NS	NS	NS	NS	NS	0.00367	0.000608	7.36e-06	0.00486	0.000297	NS	NS	NS	NS	NS	4.89e-05	1.82e-05	2.12e-06	NS	8.19e-08	0.0118	0.00747	3e-05	0.00669	0.000159
2831	regulation of response to biotic stimulus (GO:0002831)	NS	0.00252	NS	NS	NS	NS	NS	NS	NS	NS	5.68e-05	1.31e-07	3.82e-15	0.0133	NS	NS	NS	NS	NS	NS	0.00835	0.0109	NS	NS	NS	7.79e-05	3.83e-05	1.93e-09	0.0187	NS
1901701	cellular response to oxygen-containing compound (GO:1901701)	NS	0.0386	0.0251	NS	NS	NS	NS	NS	NS	NS	4.04e-10	2.4e-10	4.36e-11	7.68e-07	5.41e-05	NS	NS	NS	NS	NS	0.000902	0.041	0.00918	NS	NS	5.5e-09	3.01e-09	3.18e-08	7.51e-07	2.2e-05
23052	signaling (GO:0023052)	NS	0.0131	NS	NS	NS	NS	NS	NS	NS	NS	1.96e-09	4.69e-08	1.56e-15	2.29e-06	NS	NS	NS	NS	NS	NS	NS	0.00633	NS	NS	NS	6.2e-07	2.81e-06	1.05e-12	3.85e-06	0.0369
42435	indole-containing compound biosynthetic process (GO:0042435)	NS	0.0247	NS	NS	NS	NS	NS	NS	NS	NS	NS	0.0381	0.000581	NS	NS	NS	NS	NS	NS	NS	NS	0.0421	NS	NS	NS	0.0257	0.0159	0.00455	NS	NS
43617	cellular response to sucrose starvation (GO:0043617)	NS	0.011	NS	NS	NS	NS	NS	NS	NS	NS	0.000299	0.0359	0.0498	0.0114	0.00395	NS	NS	NS	NS	NS	NS	0.0277	NS	NS	NS	0.00999	NS	NS	NS	0.0277
31669	cellular response to nutrient levels (GO:0031669)	3.29e-07	2.1e-07	1.1e-06	NS	1.91e-07	NS	NS	NS	NS	NS	0.00179	0.000178	1.11e-06	0.00092	1.8e-05	NS	NS	NS	NS	NS	3.19e-05	1.45e-06	5.27e-07	0.00856	2.22e-09	0.00474	0.00278	4.28e-06	0.00263	3.61e-05
9081	branched-chain amino acid metabolic process (GO:0009081)	NS	NS	NS	0.0398	NS	NS	NS	NS	NS	NS	NS	NS	NS	0.0232	0.00252	NS	NS	NS	NS	NS	NS	NS	NS	0.0312	NS	0.00272	0.0459	NS	0.0026	0.0185
52544	defense response by callose deposition in cell wall (GO:0052544)	NS	0.00908	NS	NS	NS	NS	NS	NS	NS	NS	0.014	0.0084	0.00247	0.0406	NS	NS	NS	NS	NS	NS	0.048	0.0335	NS	NS	NS	0.0359	0.0174	0.00763	0.0167	NS
6886	intracellular protein transport (GO:0006886)	NS	NS	NS	NS	NS	NS	NS	0.0348	NS	NS	1.37e-06	0.0143	0.00161	NS	NS	0.0151	0.00825	1.57e-05	0.00141	NS	0.0105	NS	0.00153	NS	NS	NS	NS	NS	NS	NS
398	mRNA splicing, via spliceosome (GO:0000398)	NS	NS	NS	NS	NS	0.00186	NS	NS	NS	NS	6.84e-06	0.0406	0.0217	NS	NS	2.48e-05	0.0015	0.000185	0.00912	NS	0.00608	NS	NS	NS	NS	NS	NS	NS	NS	NS
50778	positive regulation of immune response (GO:0050778)	NS	0.00305	NS	NS	NS	NS	NS	NS	NS	NS	0.000174	0.000125	1.07e-06	0.00417	NS	NS	NS	NS	NS	NS	NS	0.0422	NS	NS	NS	0.00105	0.0205	0.00794	NS	NS
9738	abscisic acid-activated signaling pathway (GO:0009738)	NS	NS	0.0489	NS	NS	NS	NS	NS	NS	NS	0.00443	0.000256	8.65e-05	0.00311	0.0066	NS	NS	NS	NS	NS	NS	NS	0.0443	NS	NS	NS	0.0352	NS	NS	NS
9755	hormone-mediated signaling pathway (GO:0009755)	NS	NS	0.0388	NS	NS	NS	NS	NS	NS	NS	4.34e-08	1.24e-11	2.55e-10	3.86e-05	0.000335	NS	NS	NS	NS	NS	0.0105	NS	0.0312	NS	NS	0.000209	3.68e-06	1.7e-06	0.00228	0.00207
10243	response to organonitrogen compound (GO:0010243)	NS	0.0478	NS	NS	NS	NS	NS	NS	NS	NS	0.00835	NS	0.0199	0.0326	NS	NS	NS	NS	NS	NS	NS	0.0419	NS	NS	NS	0.0393	NS	NS	0.0232	NS
10029	regulation of seed germination (GO:0010029)	NS	NS	NS	NS	NS	0.00506	NS	0.0367	NS	NS	4.91e-06	0.000191	0.000155	0.000441	4.63e-06	NS	NS	NS	NS	NS	0.000141	NS	0.00996	0.0423	NS	0.000222	6.94e-06	6.04e-05	0.000203	1.69e-05
9627	systemic acquired resistance (GO:0009627)	NS	0.00208	NS	NS	NS	NS	NS	NS	NS	NS	NS	NS	0.0186	NS	NS	NS	NS	NS	NS	NS	0.0482	0.00702	NS	NS	NS	0.0153	NS	0.0128	NS	NS
7165	signal transduction (GO:0007165)	NS	0.0114	NS	NS	NS	NS	NS	NS	NS	NS	2.88e-10	1.57e-08	2.32e-16	3.94e-07	NS	NS	NS	NS	NS	NS	0.0308	0.00529	NS	NS	NS	1.56e-07	2.27e-06	3.5e-13	1.36e-06	0.0282
71495	cellular response to endogenous stimulus (GO:0071495)	NS	NS	0.0178	NS	NS	NS	NS	NS	NS	NS	7.34e-09	1.73e-12	1.36e-11	4.49e-06	1.85e-05	NS	NS	NS	NS	NS	0.00544	NS	0.0169	NS	NS	6.77e-06	3.7e-08	3.49e-08	0.000352	0.000717
70413	trehalose metabolism in response to stress (GO:0070413)	NS	0.00231	0.0154	0.0375	NS	NS	NS	NS	NS	NS	NS	0.0359	NS	0.00846	0.00231	NS	NS	NS	NS	NS	NS	0.000578	0.00579	NS	NS	0.0404	NS	0.0341	0.0013	0.00315
42759	long-chain fatty acid biosynthetic process (GO:0042759)	NS	0.019	NS	NS	NS	NS	NS	NS	NS	NS	NS	NS	0.0453	NS	NS	NS	NS	NS	NS	NS	NS	0.018	NS	NS	NS	0.0237	0.0234	0.00832	NS	NS
46395	carboxylic acid catabolic process (GO:0046395)	NS	NS	NS	NS	NS	0.004	NS	0.019	NS	NS	0.000212	4.59e-11	9.19e-10	5.31e-08	1.78e-06	NS	NS	NS	NS	NS	1.87e-05	NS	0.000342	0.0095	NS	0.00052	4.15e-08	1.82e-08	5.55e-10	1.26e-06
6355	regulation of DNA-templated transcription (GO:0006355)	NS	NS	NS	NS	NS	0.000379	NS	0.0327	NS	NS	0.00102	0.0428	NS	0.00555	6.1e-05	NS	NS	NS	NS	NS	0.00018	NS	0.0386	0.0494	NS	NS	NS	NS	NS	0.0232
32870	cellular response to hormone stimulus (GO:0032870)	NS	NS	0.018	NS	NS	NS	NS	NS	NS	NS	3.76e-09	1.73e-13	7.69e-12	2.88e-06	7.81e-06	NS	NS	NS	NS	NS	0.00803	NS	0.0131	NS	NS	7.18e-06	3.56e-08	4.18e-08	0.000202	0.000239
1676	long-chain fatty acid metabolic process (GO:0001676)	NS	0.00546	NS	NS	NS	NS	NS	NS	NS	NS	NS	0.00317	9.6e-05	NS	NS	NS	NS	NS	NS	NS	NS	0.0135	NS	NS	NS	0.03	0.00212	0.000588	NS	NS
42752	regulation of circadian rhythm (GO:0042752)	NS	NS	NS	NS	NS	0.00547	NS	0.0361	NS	NS	4.22e-05	0.00152	0.000565	NS	0.0357	NS	NS	NS	NS	NS	0.0182	NS	NS	NS	NS	4.27e-06	3.36e-06	1.53e-05	0.0158	0.000293
2684	positive regulation of immune system process (GO:0002684)	NS	0.00301	NS	NS	NS	NS	NS	NS	NS	NS	0.000173	0.000124	1.06e-06	0.00415	NS	NS	NS	NS	NS	NS	NS	0.0419	NS	NS	NS	0.00104	0.0204	0.00793	NS	NS
99402	plant organ development (GO:0099402)	NS	NS	NS	NS	NS	NS	NS	NS	NS	NS	0.000347	0.0141	0.0209	NS	NS	NS	NS	0.00551	NS	NS	NS	NS	NS	NS	NS	0.00967	0.0281	1.06e-05	NS	NS
45089	positive regulation of innate immune response (GO:0045089)	NS	0.00247	NS	NS	NS	NS	NS	NS	NS	NS	0.000287	0.000219	7.39e-06	0.00842	NS	NS	NS	NS	NS	NS	NS	0.034	NS	NS	NS	0.000859	0.0404	0.0217	NS	NS
32101	regulation of response to external stimulus (GO:0032101)	NS	0.000433	0.00449	NS	NS	NS	NS	NS	NS	NS	1.55e-05	2.4e-08	1.77e-17	0.0187	NS	NS	NS	NS	NS	NS	0.00118	0.00357	0.0113	NS	NS	2.62e-05	4.8e-06	1.02e-11	0.0243	NS
16054	organic acid catabolic process (GO:0016054)	NS	NS	NS	NS	NS	0.00402	NS	0.0191	NS	NS	0.000213	4.68e-11	9.3e-10	5.44e-08	1.84e-06	NS	NS	NS	NS	NS	1.89e-05	NS	0.000346	0.00963	NS	0.000522	4.19e-08	1.84e-08	5.69e-10	1.28e-06
2001141	regulation of RNA biosynthetic process (GO:2001141)	NS	NS	NS	NS	NS	0.000263	NS	0.0327	NS	NS	0.00102	0.0465	NS	0.00557	7.57e-05	NS	NS	NS	NS	NS	0.000156	NS	0.0439	0.0493	NS	NS	NS	NS	NS	0.0232
44272	sulfur compound biosynthetic process (GO:0044272)	NS	0.0048	NS	NS	NS	NS	NS	NS	NS	NS	NS	NS	NS	NS	NS	3.2e-05	0.00214	0.00844	9.46e-08	NS	0.0251	0.00653	0.0368	NS	NS	0.00412	0.00958	0.000572	8.93e-05	NS
16192	vesicle-mediated transport (GO:0016192)	NS	NS	0.00776	NS	NS	NS	NS	NS	NS	NS	4.88e-07	NS	9.42e-06	0.0143	NS	3.33e-05	4.95e-07	9.69e-07	0.00212	NS	0.000415	0.000343	2.34e-05	NS	0.00854	NS	NS	NS	NS	NS
48573	photoperiodism, flowering (GO:0048573)	NS	NS	NS	NS	NS	NS	NS	NS	NS	NS	0.005	0.0332	0.0339	NS	NS	NS	NS	NS	0.0484	NS	NS	NS	NS	NS	NS	0.000203	0.000992	0.00529	0.0102	NS
6458	'de novo' protein folding (GO:0006458)	NS	NS	NS	NS	NS	0.00034	NS	0.017	NS	NS	NS	NS	NS	NS	NS	6.33e-06	6.86e-07	7.98e-07	0.0181	NS	0.0297	NS	NS	NS	NS	0.00158	0.000146	0.000368	NS	NS
10286	heat acclimation (GO:0010286)	NS	NS	NS	NS	NS	0.000106	NS	0.036	NS	NS	NS	NS	NS	NS	NS	0.00285	0.0147	0.0345	0.0473	NS	0.000798	NS	0.0391	NS	NS	0.0228	0.0166	0.00275	NS	0.00988
10038	response to metal ion (GO:0010038)	NS	NS	NS	NS	NS	NS	NS	0.00245	NS	NS	NS	NS	0.0109	NS	0.00656	NS	NS	NS	NS	NS	0.0123	0.0065	0.00024	NS	NS	NS	NS	0.00322	NS	0.00195
51085	chaperone cofactor-dependent protein refolding (GO:0051085)	NS	NS	NS	NS	NS	0.000126	NS	0.0104	NS	NS	NS	NS	NS	NS	NS	2.19e-05	1.65e-05	1.4e-05	0.01	NS	0.0132	NS	NS	NS	NS	0.0116	0.000772	0.00145	NS	NS
51084	'de novo' post-translational protein folding (GO:0051084)	NS	NS	NS	NS	NS	0.000125	NS	0.0103	NS	NS	NS	NS	NS	NS	NS	2.18e-05	1.63e-05	1.39e-05	0.00998	NS	0.0132	NS	NS	NS	NS	0.0116	0.000769	0.00144	NS	NS
9737	response to abscisic acid (GO:0009737)	NS	NS	NS	NS	NS	1.56e-07	NS	0.0276	0.0479	0.00195	6.63e-06	9.49e-11	5.94e-09	2.59e-05	5.82e-05	NS	NS	NS	NS	NS	1.69e-07	0.0479	0.00207	NS	0.00971	7.73e-08	2.29e-11	2.07e-07	2.85e-07	6.6e-06
6457	protein folding (GO:0006457)	NS	NS	NS	NS	NS	9.75e-07	NS	0.00778	NS	NS	NS	NS	NS	NS	NS	3.5e-14	4.97e-11	1.3e-13	2.75e-05	NS	0.0121	NS	NS	NS	NS	1.61e-07	8.81e-05	1.55e-05	0.017	NS
16122	xanthophyll metabolic process (GO:0016122)	NS	NS	NS	NS	NS	0.000106	NS	0.0267	NS	NS	NS	NS	NS	NS	NS	0.000836	0.000335	8.81e-06	0.000292	0.0128	0.000422	NS	NS	NS	NS	NS	0.0265	0.00319	0.0234	NS
44042	glucan metabolic process (GO:0044042)	NS	NS	NS	NS	NS	0.00612	NS	0.00732	NS	NS	NS	NS	NS	NS	NS	1.12e-05	2.26e-05	5.94e-05	0.000328	0.0135	0.0097	NS	NS	NS	NS	2.03e-06	2.13e-05	0.000168	0.000119	0.000658
48366	leaf development (GO:0048366)	NS	NS	NS	NS	NS	NS	NS	NS	NS	NS	0.00121	0.000609	0.00176	NS	NS	NS	NS	0.0242	NS	NS	NS	NS	NS	NS	NS	0.000419	0.000229	3.77e-06	0.00967	NS
9787	regulation of abscisic acid-activated signaling pathway (GO:0009787)	NS	NS	NS	NS	NS	0.0209	NS	NS	NS	NS	0.0105	0.000622	0.0107	NS	NS	NS	NS	NS	NS	NS	NS	NS	NS	NS	NS	NS	NS	NS	NS	NS
1905957	regulation of cellular response to alcohol (GO:1905957)	NS	NS	NS	NS	NS	0.0209	NS	NS	NS	NS	0.0104	0.000619	0.0107	NS	NS	NS	NS	NS	NS	NS	NS	NS	NS	NS	NS	NS	NS	NS	NS	NS
9651	response to salt stress (GO:0009651)	NS	NS	NS	NS	NS	6.62e-05	NS	0.00775	0.00309	0.0227	1.7e-07	2.78e-10	1.27e-09	4.49e-06	0.0017	NS	NS	NS	NS	NS	9.11e-06	0.00768	0.00435	NS	NS	2.82e-07	1.39e-09	1.19e-07	1.99e-07	0.00195
9649	entrainment of circadian clock (GO:0009649)	NS	NS	NS	NS	NS	NS	NS	NS	NS	NS	0.0378	0.00487	0.00165	NS	NS	NS	NS	NS	NS	NS	NS	NS	NS	NS	NS	0.0401	0.000893	0.000466	NS	NS
48580	regulation of post-embryonic development (GO:0048580)	NS	NS	NS	NS	NS	0.00535	0.0306	0.0228	0.0124	NS	1.1e-06	1.57e-05	0.000433	9.44e-05	0.000287	NS	NS	NS	NS	NS	0.00187	NS	0.0471	NS	NS	0.000132	4.13e-06	0.00019	0.000187	0.000496
7142	male meiosis II (GO:0007142)	NS	NS	NS	NS	NS	0.0325	NS	0.00731	NS	NS	NS	NS	NS	NS	NS	NS	NS	0.00935	NS	0.0184	NS	NS	0.0312	NS	NS	NS	NS	NS	NS	NS
71484	cellular response to light intensity (GO:0071484)	NS	NS	NS	NS	NS	0.000142	NS	0.0109	NS	NS	NS	NS	NS	NS	NS	0.00431	0.0145	0.00308	NS	NS	0.00271	NS	NS	NS	NS	0.0298	NS	0.0248	NS	NS
71486	cellular response to high light intensity (GO:0071486)	NS	NS	NS	NS	NS	0.00018	NS	0.0125	NS	NS	NS	NS	NS	NS	NS	0.0285	0.0189	0.0212	0.0357	NS	0.00164	NS	NS	NS	NS	NS	NS	NS	NS	NS
5976	polysaccharide metabolic process (GO:0005976)	NS	NS	NS	NS	NS	0.00155	NS	0.00167	NS	NS	NS	NS	NS	NS	0.0463	0.00589	0.0229	0.00552	NS	NS	0.0049	NS	0.00438	NS	NS	0.00181	NS	0.0127	0.00778	0.0232
48646	anatomical structure formation involved in morphogenesis (GO:0048646)	NS	NS	NS	NS	NS	0.0375	NS	0.0326	NS	NS	NS	NS	NS	NS	NS	NS	NS	0.0154	NS	NS	NS	NS	NS	NS	NS	NS	NS	NS	0.0103	NS
9269	response to desiccation (GO:0009269)	NS	NS	NS	NS	NS	0.00137	NS	0.0132	NS	NS	NS	NS	NS	NS	NS	NS	NS	NS	NS	NS	0.0287	NS	NS	NS	NS	NS	NS	NS	NS	NS
6720	isoprenoid metabolic process (GO:0006720)	NS	NS	NS	NS	NS	0.0268	NS	0.0304	NS	NS	NS	NS	NS	NS	NS	NS	NS	NS	NS	NS	0.00274	NS	0.0208	NS	NS	NS	NS	NS	NS	NS
42754	negative regulation of circadian rhythm (GO:0042754)	NS	NS	NS	NS	NS	0.00518	NS	0.049	NS	NS	NS	NS	NS	NS	NS	NS	NS	NS	NS	NS	0.0192	NS	NS	NS	NS	NS	NS	NS	NS	NS
51234	establishment of localization (GO:0051234)	NS	NS	NS	NS	NS	NS	NS	NS	NS	NS	4.7e-09	1.71e-05	1.75e-06	NS	NS	NS	NS	NS	NS	NS	NS	NS	NS	NS	NS	0.00016	0.00508	0.00283	NS	NS
272	polysaccharide catabolic process (GO:0000272)	NS	NS	NS	NS	NS	0.00258	NS	0.00605	NS	NS	NS	NS	NS	NS	NS	NS	NS	NS	NS	NS	0.0207	0.0366	0.0101	NS	NS	NS	NS	NS	NS	NS
97305	response to alcohol (GO:0097305)	NS	NS	NS	NS	NS	2.01e-07	NS	0.0306	NS	0.00223	3.81e-06	8.25e-11	3.07e-09	1.96e-05	4.26e-05	NS	NS	NS	NS	NS	1.96e-07	NS	0.00166	NS	0.0105	7.25e-08	4.63e-11	1.04e-07	3.38e-07	5.15e-06
71398	cellular response to fatty acid (GO:0071398)	NS	NS	NS	NS	NS	NS	NS	NS	NS	NS	0.026	0.0486	0.0402	NS	NS	NS	NS	NS	NS	NS	NS	NS	NS	NS	NS	0.0205	NS	0.0357	NS	NS
6952	defense response (GO:0006952)	4.35e-06	5.45e-15	4.38e-07	NS	NS	1.01e-06	NS	NS	NS	NS	4.41e-07	3.73e-14	1.31e-25	1.5e-05	0.0243	0.00067	NS	NS	0.0441	NS	4.59e-14	8.69e-09	1.48e-06	NS	NS	2.26e-12	1.47e-14	6.35e-17	8.26e-08	0.000503
9743	response to carbohydrate (GO:0009743)	NS	0.00313	NS	NS	NS	0.000162	NS	NS	NS	NS	0.000967	0.00318	0.00241	0.000674	0.000652	NS	0.00333	0.00224	0.000838	NS	1.69e-06	0.000128	0.0295	NS	0.00383	5.09e-05	3.23e-07	1.31e-07	3.89e-08	2.72e-05
9063	amino acid catabolic process (GO:0009063)	0.0238	0.0422	0.0491	NS	NS	0.0342	NS	NS	NS	NS	0.00127	3.01e-08	6.02e-06	2.93e-07	4.62e-06	NS	NS	NS	NS	NS	6.05e-05	NS	0.00401	0.0246	NS	0.000223	8.66e-07	1.77e-06	2.39e-09	2.1e-06
9751	response to salicylic acid (GO:0009751)	0.000821	0.00042	0.039	NS	NS	0.00873	NS	NS	NS	NS	0.0176	3.07e-05	2.04e-10	0.00418	NS	NS	NS	NS	NS	NS	1.45e-06	0.00458	0.0294	NS	NS	0.00033	8.25e-06	2.21e-06	0.00107	0.0088
2000026	regulation of multicellular organismal development (GO:2000026)	NS	NS	NS	NS	NS	0.00647	0.039	0.0302	0.0169	NS	5.1e-07	3.55e-05	0.00055	0.000133	0.000255	NS	NS	NS	NS	NS	0.00178	NS	0.0409	0.0455	NS	0.000185	1.64e-05	0.000446	0.000361	0.000662
70542	response to fatty acid (GO:0070542)	0.000285	5.1e-05	7.38e-06	NS	0.0121	0.0315	NS	NS	NS	NS	0.000145	1.56e-06	1.52e-09	0.000188	0.00163	0.0149	NS	NS	0.0127	NS	6.56e-07	0.000395	3.59e-06	NS	0.035	9.9e-08	1.67e-07	2.16e-10	1.79e-07	5.77e-05
9753	response to jasmonic acid (GO:0009753)	0.0049	0.000749	2.26e-05	NS	0.0106	0.0192	NS	NS	NS	NS	0.000489	6.02e-06	6.36e-09	0.000327	0.00124	0.0191	NS	NS	0.0108	NS	8.4e-06	0.00301	6.96e-06	NS	0.0304	3.66e-07	3.48e-07	4.52e-10	2.4e-07	4.11e-05
1901575	organic substance catabolic process (GO:1901575)	NS	NS	NS	NS	NS	NS	NS	0.0043	NS	NS	3.96e-08	1.41e-12	7.59e-12	6.17e-10	0.00041	NS	NS	NS	NS	NS	0.0182	NS	0.00337	NS	NS	7.14e-06	2.58e-06	2.85e-06	8.12e-10	0.0182
9620	response to fungus (GO:0009620)	1.82e-05	1.11e-10	0.000308	NS	NS	0.000817	NS	NS	NS	NS	2.28e-08	2.08e-15	1.27e-19	0.000177	NS	NS	NS	NS	NS	NS	4.5e-10	3.85e-10	0.000101	NS	NS	5.22e-08	1.1e-12	5.18e-11	0.000194	NS
80134	regulation of response to stress (GO:0080134)	NS	0.00244	0.0491	NS	NS	0.00068	NS	NS	NS	NS	3.25e-08	6.81e-11	2.54e-17	0.000225	NS	NS	NS	NS	NS	NS	4.83e-05	0.00594	0.00135	NS	NS	7.23e-08	5.58e-08	2.19e-11	0.000405	NS
16051	carbohydrate biosynthetic process (GO:0016051)	NS	NS	NS	NS	NS	0.0299	NS	0.0191	NS	0.00813	NS	NS	NS	NS	NS	2.13e-06	5.24e-07	8e-07	9.55e-06	0.0205	0.0239	NS	NS	NS	NS	0.000464	0.000801	0.00239	0.000136	NS
6094	gluconeogenesis (GO:0006094)	NS	NS	NS	NS	NS	0.031	NS	0.000114	NS	0.00279	NS	NS	NS	NS	NS	1.11e-06	2.05e-05	0.000296	2.87e-07	NS	NS	NS	0.00572	NS	0.0286	0.000325	0.00198	0.017	5.39e-05	NS
72526	pyridine-containing compound catabolic process (GO:0072526)	NS	NS	NS	NS	NS	0.00809	NS	3.59e-06	NS	7.27e-06	NS	NS	NS	NS	NS	0.00079	0.0019	0.00151	2.16e-05	NS	0.0448	NS	0.00207	NS	0.000628	NS	NS	NS	0.00573	NS
140546	defense response to symbiont (GO:0140546)	NS	0.000192	0.0208	NS	NS	0.0189	NS	NS	NS	NS	0.00935	0.0037	6.06e-07	0.0123	NS	NS	NS	NS	NS	NS	8.35e-05	0.00706	NS	NS	NS	0.01	0.0372	0.000892	NS	NS
6091	generation of precursor metabolites and energy (GO:0006091)	NS	NS	NS	NS	NS	1.92e-16	NS	1.77e-09	0.000324	3.25e-07	NS	NS	NS	NS	NS	2.1e-32	1.66e-26	6.54e-16	1.28e-14	0.0104	5.77e-10	NS	2.3e-05	0.00161	0.000118	2.64e-18	1.73e-15	1.12e-07	6.94e-08	NS
9137	purine nucleoside diphosphate catabolic process (GO:0009137)	NS	NS	NS	NS	NS	0.016	NS	1.18e-05	NS	6.06e-06	NS	NS	NS	NS	NS	0.00302	0.00263	0.00194	4.73e-05	NS	NS	NS	0.00395	NS	0.000412	NS	NS	NS	0.00728	NS
3018	vascular process in circulatory system (GO:0003018)	NS	NS	NS	NS	NS	NS	NS	0.0093	NS	NS	NS	NS	NS	NS	NS	NS	NS	0.0202	0.0108	NS	NS	NS	0.000735	0.00544	NS	NS	0.018	NS	NS	NS
46032	ADP catabolic process (GO:0046032)	NS	NS	NS	NS	NS	0.0162	NS	1.24e-05	NS	7.07e-06	NS	NS	NS	NS	NS	0.00305	0.00266	0.00196	4.88e-05	NS	NS	NS	0.00403	NS	0.000435	NS	NS	NS	0.00736	NS
51553	flavone biosynthetic process (GO:0051553)	NS	NS	NS	NS	NS	0.000145	5.86e-05	0.00138	0.000377	NS	NS	NS	NS	NS	NS	NS	0.00423	0.0263	0.0021	0.0438	0.00108	0.00232	0.027	0.00625	NS	NS	0.00199	NS	0.0346	0.00858
9261	ribonucleotide catabolic process (GO:0009261)	NS	NS	NS	NS	NS	0.0263	NS	2.16e-05	NS	7.76e-06	NS	NS	NS	NS	NS	0.00691	0.0054	0.00437	0.0001	NS	NS	NS	0.00672	NS	0.000648	NS	NS	NS	0.00578	NS
10275	NAD(P)H dehydrogenase complex assembly (GO:0010275)	NS	NS	NS	NS	NS	NS	NS	NS	NS	NS	NS	NS	NS	NS	NS	6.82e-06	0.000643	8.05e-05	NS	NS	NS	NS	NS	NS	NS	0.000994	0.0216	0.0067	NS	NS
10646	regulation of cell communication (GO:0010646)	NS	0.013	0.0492	NS	NS	0.00581	NS	NS	NS	NS	1.29e-07	8.94e-12	1.04e-12	0.00136	7.87e-05	NS	NS	NS	NS	NS	0.00119	0.0412	0.008	NS	NS	0.0014	4.29e-07	3.26e-07	NS	0.00281
9181	purine ribonucleoside diphosphate catabolic process (GO:0009181)	NS	NS	NS	NS	NS	0.016	NS	1.2e-05	NS	6.36e-06	NS	NS	NS	NS	NS	0.00303	0.00264	0.00195	4.78e-05	NS	NS	NS	0.00398	NS	0.000419	NS	NS	NS	0.0073	NS
42742	defense response to bacterium (GO:0042742)	0.0226	1.79e-08	0.0143	NS	NS	0.000267	NS	NS	NS	NS	7.97e-06	9.12e-12	5.57e-17	0.000133	NS	0.00883	NS	NS	NS	NS	1.92e-07	1.07e-06	0.00207	NS	NS	1.45e-09	5.76e-11	2.51e-14	3.41e-05	0.0301
72598	protein localization to chloroplast (GO:0072598)	NS	NS	NS	NS	NS	NS	NS	NS	NS	NS	NS	NS	NS	NS	NS	1.31e-06	0.000728	3.26e-06	NS	NS	NS	NS	NS	NS	NS	0.000791	NS	0.021	NS	NS
31347	regulation of defense response (GO:0031347)	NS	0.00182	0.0327	NS	NS	0.0301	NS	NS	NS	NS	5.03e-07	7.99e-10	6.67e-18	0.000146	NS	NS	NS	NS	NS	NS	0.00156	0.0232	0.0176	NS	NS	1.81e-06	6.89e-07	1.21e-10	0.000699	NS
9117	nucleotide metabolic process (GO:0009117)	NS	NS	NS	NS	NS	NS	NS	0.021	NS	8.88e-06	NS	NS	NS	NS	NS	0.000363	0.00125	7.99e-05	0.000709	NS	NS	NS	NS	NS	0.0148	NS	NS	0.000567	NS	NS
1901292	nucleoside phosphate catabolic process (GO:1901292)	NS	NS	NS	NS	NS	0.0474	NS	3.69e-05	NS	3.93e-05	NS	NS	NS	NS	NS	0.0025	0.00389	0.00151	1.93e-05	0.0453	NS	NS	0.0143	NS	0.00307	NS	NS	NS	0.00196	NS
98542	defense response to other organism (GO:0098542)	0.00356	1.21e-13	0.00034	NS	NS	4.68e-06	NS	NS	NS	NS	1.25e-08	1.61e-16	1.83e-28	4.12e-08	0.00336	0.00223	NS	NS	NS	NS	3.37e-10	1.07e-08	0.000373	NS	NS	4.39e-13	4.49e-16	1.15e-20	1.6e-08	0.000982
72523	purine-containing compound catabolic process (GO:0072523)	NS	NS	NS	NS	NS	NS	NS	5.68e-05	NS	4.96e-05	NS	NS	NS	NS	NS	0.0118	0.0199	0.0166	0.000447	NS	NS	NS	0.00688	NS	0.00395	NS	NS	0.0292	0.00121	NS
50789	regulation of biological process (GO:0050789)	NS	NS	NS	NS	NS	5.22e-05	NS	NS	NS	NS	5.38e-25	5.22e-20	5.15e-23	1.6e-11	7.84e-09	NS	NS	0.0344	NS	NS	5.08e-07	0.0475	0.00683	NS	NS	6.56e-13	2.01e-16	5.99e-22	1.79e-08	1.65e-07
9134	nucleoside diphosphate catabolic process (GO:0009134)	NS	NS	NS	NS	NS	0.0356	NS	3.52e-05	NS	9.86e-06	NS	NS	NS	NS	NS	0.00436	0.00895	0.00272	3.78e-05	NS	NS	NS	0.00988	NS	0.000856	NS	NS	NS	0.00364	NS
42026	protein refolding (GO:0042026)	NS	NS	NS	NS	NS	4.36e-07	NS	0.0127	0.0262	NS	NS	NS	NS	NS	NS	1.54e-09	1.19e-10	3.09e-14	3.85e-05	0.00279	0.000183	NS	NS	NS	NS	9.32e-05	2.56e-06	7.71e-08	0.00668	NS
42168	heme metabolic process (GO:0042168)	NS	NS	NS	NS	NS	NS	NS	NS	NS	NS	NS	NS	NS	NS	NS	8.08e-05	0.000769	0.0212	NS	NS	NS	NS	NS	NS	NS	0.0104	0.0115	NS	NS	NS
9813	flavonoid biosynthetic process (GO:0009813)	NS	NS	NS	NS	NS	2.26e-09	4.15e-10	2.63e-08	3.73e-05	NS	NS	NS	NS	NS	NS	2.53e-05	2.49e-08	6.84e-09	1.28e-10	2.47e-11	1.59e-07	4.77e-08	1.49e-05	0.00298	NS	0.0016	3.33e-06	2.99e-06	1.71e-07	4.72e-09
9135	purine nucleoside diphosphate metabolic process (GO:0009135)	NS	NS	NS	NS	NS	0.00607	NS	1.61e-05	NS	6.93e-06	NS	NS	NS	NS	NS	0.00156	0.00125	0.0029	6.73e-05	NS	0.0341	NS	0.0052	NS	0.000506	NS	NS	NS	0.0106	NS
6631	fatty acid metabolic process (GO:0006631)	NS	NS	NS	NS	NS	0.0095	NS	NS	NS	NS	NS	NS	0.0025	NS	NS	1.85e-06	0.000168	8.15e-10	0.000826	0.0152	0.0481	NS	NS	NS	NS	8.78e-06	2.67e-05	9.29e-15	0.00624	0.0273
9154	purine ribonucleotide catabolic process (GO:0009154)	NS	NS	NS	NS	NS	0.0262	NS	2.13e-05	NS	7.51e-06	NS	NS	NS	NS	NS	0.00689	0.00538	0.00436	9.96e-05	NS	NS	NS	0.00668	NS	0.000638	NS	NS	NS	0.00575	NS
44255	cellular lipid metabolic process (GO:0044255)	NS	NS	NS	NS	NS	0.000976	NS	NS	NS	NS	NS	NS	3.89e-05	NS	NS	5.76e-06	0.00151	8.05e-07	0.000193	NS	5.3e-05	0.0108	0.0135	NS	NS	3.61e-07	2.7e-05	6.63e-14	0.000201	NS
19637	organophosphate metabolic process (GO:0019637)	NS	NS	NS	NS	NS	NS	NS	0.0344	NS	0.00024	NS	NS	NS	NS	NS	1.4e-05	0.003	4.46e-05	0.000125	NS	NS	NS	NS	NS	0.033	0.000809	NS	2.06e-05	0.0294	NS
9772	photosynthetic electron transport in photosystem II (GO:0009772)	NS	NS	NS	NS	NS	0.000283	NS	NS	NS	NS	NS	NS	NS	NS	NS	0.0364	0.000279	0.00407	NS	NS	0.00384	NS	NS	NS	NS	NS	0.0115	NS	NS	NS
44249	cellular biosynthetic process (GO:0044249)	NS	NS	0.0317	NS	NS	0.00527	NS	NS	NS	NS	NS	0.0453	0.015	NS	0.00259	4.46e-51	5.37e-35	6.47e-59	2.23e-14	0.011	NS	NS	NS	NS	NS	6.61e-32	1.5e-13	6.6e-25	0.000159	NS
43455	regulation of secondary metabolic process (GO:0043455)	NS	NS	0.0454	NS	NS	0.0152	NS	NS	NS	NS	NS	NS	NS	NS	NS	NS	NS	NS	NS	NS	0.00123	NS	0.00396	NS	NS	0.00657	NS	NS	NS	NS
9617	response to bacterium (GO:0009617)	0.00184	2.34e-09	0.0169	NS	NS	1.74e-05	NS	NS	NS	NS	8.6e-07	3.47e-12	1.56e-20	4.28e-05	NS	0.000589	NS	NS	NS	NS	5.14e-10	4.92e-07	0.000359	0.0493	NS	2.71e-12	2.02e-12	4.27e-18	2.25e-06	0.00851
3008	system process (GO:0003008)	NS	NS	NS	NS	NS	NS	NS	0.00918	NS	NS	NS	NS	NS	NS	NS	NS	NS	0.0201	0.0107	NS	NS	NS	0.000722	0.00528	NS	NS	0.0179	NS	NS	NS
46451	diaminopimelate metabolic process (GO:0046451)	NS	NS	NS	NS	NS	NS	NS	NS	NS	NS	NS	NS	NS	NS	NS	0.00025	0.000886	0.000183	NS	NS	NS	NS	NS	NS	NS	0.022	0.0403	0.0182	NS	NS
19318	hexose metabolic process (GO:0019318)	NS	NS	NS	NS	NS	0.0006	NS	2.8e-06	NS	3.73e-06	NS	NS	NS	NS	NS	0.00157	0.0198	0.0132	6.9e-05	NS	0.0017	NS	1.71e-06	0.0254	9.26e-05	NS	NS	NS	0.00594	NS
1901606	alpha-amino acid catabolic process (GO:1901606)	0.0355	NS	0.0316	NS	NS	0.0425	NS	NS	NS	NS	0.00755	2.63e-07	3.39e-05	5.64e-06	0.000124	NS	NS	NS	0.0111	NS	0.000124	NS	0.0131	NS	NS	0.000585	3.49e-07	7.65e-06	3.07e-09	2.13e-05
9191	ribonucleoside diphosphate catabolic process (GO:0009191)	NS	NS	NS	NS	NS	0.0161	NS	1.22e-05	NS	6.7e-06	NS	NS	NS	NS	NS	0.00304	0.00265	0.00195	4.83e-05	NS	NS	NS	0.00401	NS	0.000427	NS	NS	NS	0.00733	NS
6090	pyruvate metabolic process (GO:0006090)	NS	NS	NS	NS	NS	0.00685	NS	4.25e-05	NS	4.19e-05	NS	NS	NS	NS	NS	0.0094	0.00447	0.000642	0.000335	NS	NS	NS	0.0162	NS	0.00332	NS	NS	0.00796	0.0174	NS
9451	RNA modification (GO:0009451)	0.00513	NS	0.0385	NS	NS	6.89e-05	NS	NS	NS	NS	0.00251	0.0431	8.94e-08	0.00233	0.00165	NS	NS	NS	NS	0.00948	4.12e-09	0.00175	0.00027	NS	NS	1.52e-05	0.0216	7.37e-05	2.06e-05	5.85e-07
9698	phenylpropanoid metabolic process (GO:0009698)	NS	NS	NS	NS	NS	4.14e-07	0.00701	0.0089	NS	1.22e-05	NS	NS	NS	NS	NS	NS	0.0298	0.00946	2.59e-05	0.000387	1.85e-06	0.00557	0.00198	NS	0.00256	NS	0.0218	0.0205	0.00263	0.0458
6779	porphyrin-containing compound biosynthetic process (GO:0006779)	NS	NS	NS	NS	NS	4.56e-06	NS	0.0477	0.00924	NS	NS	NS	NS	NS	NS	1.28e-10	1.43e-07	2.43e-08	0.000584	3.49e-06	0.00164	NS	NS	NS	NS	5.29e-06	0.000102	1.51e-05	0.0301	0.000907
46434	organophosphate catabolic process (GO:0046434)	NS	NS	NS	NS	NS	NS	NS	0.000158	NS	0.000277	NS	NS	NS	NS	NS	0.00567	NS	0.0141	5.42e-05	NS	0.0308	NS	0.000395	NS	0.000916	0.000367	0.025	0.0218	1.89e-05	NS
9089	lysine biosynthetic process via diaminopimelate (GO:0009089)	NS	NS	NS	NS	NS	NS	NS	NS	NS	NS	NS	NS	NS	NS	NS	0.000252	0.000891	0.000183	NS	NS	NS	NS	NS	NS	NS	0.0221	0.0404	0.0182	NS	NS
10224	response to UV-B (GO:0010224)	NS	NS	NS	NS	NS	1.74e-06	0.000415	1.87e-07	0.000896	NS	NS	NS	NS	NS	NS	3.07e-06	0.000597	0.00023	1.48e-07	3.16e-07	1.96e-05	0.00296	2.9e-05	0.0334	NS	1.51e-06	0.00868	0.00465	1.51e-06	5.35e-05
70141	response to UV-A (GO:0070141)	NS	NS	NS	NS	NS	0.000454	NS	0.00335	0.0305	NS	NS	NS	NS	NS	NS	0.00324	0.00232	0.00245	0.00984	NS	0.00273	NS	0.0158	NS	NS	0.0284	0.0191	0.0241	NS	NS
9260	ribonucleotide biosynthetic process (GO:0009260)	NS	NS	NS	NS	NS	NS	NS	NS	NS	NS	NS	NS	NS	NS	NS	0.0428	0.00267	0.00134	NS	NS	NS	NS	NS	NS	NS	NS	NS	0.0226	NS	NS
45727	positive regulation of translation (GO:0045727)	NS	NS	NS	NS	NS	NS	NS	NS	NS	NS	NS	NS	NS	NS	NS	0.0335	0.00358	0.00529	NS	NS	NS	NS	NS	NS	NS	NS	0.00259	0.00577	NS	0.0432
71310	cellular response to organic substance (GO:0071310)	0.0295	NS	0.0478	NS	NS	0.0227	NS	NS	NS	NS	5.85e-10	2.53e-12	3.43e-12	4.82e-07	3.16e-05	NS	NS	NS	NS	NS	4.81e-05	0.0109	0.00568	NS	NS	1.07e-08	1.17e-10	3.24e-10	2.15e-06	4.29e-05
71482	cellular response to light stimulus (GO:0071482)	NS	NS	NS	NS	NS	3.14e-08	2.5e-06	7.13e-07	2.62e-05	6.42e-05	NS	NS	NS	NS	NS	7.8e-07	1.37e-06	1.25e-05	1.24e-05	1.13e-05	1.91e-05	0.00355	0.00104	0.00493	0.00763	1.7e-09	1.05e-06	4.66e-08	3.37e-06	5.14e-06
19319	hexose biosynthetic process (GO:0019319)	NS	NS	NS	NS	NS	NS	NS	0.000261	NS	0.0041	NS	NS	NS	NS	NS	7.56e-06	9.37e-05	0.000952	1.35e-06	NS	NS	NS	0.00232	NS	0.0415	0.000463	0.00214	0.00582	5.04e-06	NS
33260	nuclear DNA replication (GO:0033260)	NS	NS	NS	NS	NS	NS	NS	NS	NS	NS	NS	NS	NS	NS	NS	0.00721	0.00367	0.0052	NS	NS	NS	NS	NS	NS	NS	0.0122	0.0254	0.0417	NS	NS
2000030	regulation of response to red or far red light (GO:2000030)	NS	NS	NS	NS	NS	0.000277	5.24e-05	0.000553	0.00014	NS	NS	NS	NS	NS	NS	NS	0.0211	NS	NS	NS	0.0258	0.00599	0.0391	0.00615	NS	0.0406	0.0189	NS	NS	NS
1905156	negative regulation of photosynthesis (GO:1905156)	NS	NS	NS	NS	NS	0.000248	NS	NS	NS	NS	NS	NS	NS	NS	NS	0.00108	0.000491	0.00518	NS	NS	0.00464	NS	NS	NS	NS	0.0122	0.000853	0.0103	NS	NS
9644	response to high light intensity (GO:0009644)	NS	NS	NS	NS	NS	9.35e-23	0.0159	1.17e-08	3.53e-08	NS	NS	NS	NS	NS	NS	1.31e-17	1.09e-13	3.48e-07	2.75e-07	0.000578	1.43e-15	NS	5.32e-05	1.81e-05	NS	3.69e-11	2.39e-09	0.000504	0.000874	NS
10233	phloem transport (GO:0010233)	NS	NS	NS	NS	NS	NS	NS	0.00941	NS	NS	NS	NS	NS	NS	NS	NS	NS	0.0203	0.0108	NS	NS	NS	0.000749	0.00562	NS	NS	0.018	NS	NS	NS
9166	nucleotide catabolic process (GO:0009166)	NS	NS	NS	NS	NS	0.0221	NS	1.26e-05	NS	1.66e-05	NS	NS	NS	NS	NS	0.00151	0.000956	0.000901	2.11e-05	NS	NS	NS	0.00582	NS	0.00146	NS	NS	NS	0.00335	NS
9150	purine ribonucleotide metabolic process (GO:0009150)	NS	NS	NS	NS	NS	NS	NS	NS	NS	0.000235	NS	NS	NS	NS	NS	0.0027	0.000155	0.000332	9.18e-05	NS	NS	NS	NS	NS	0.0425	NS	NS	0.0106	NS	NS
9765	photosynthesis, light harvesting (GO:0009765)	NS	NS	NS	NS	NS	2.67e-15	NS	0.000119	4.16e-05	NS	NS	NS	NS	NS	NS	9.34e-21	3.76e-17	3.51e-07	0.000914	0.00814	1.44e-10	NS	0.0131	0.00207	NS	4.22e-12	8.25e-10	0.0053	NS	NS
31323	regulation of cellular metabolic process (GO:0031323)	NS	NS	NS	NS	NS	0.000975	NS	NS	NS	NS	7.18e-10	2.97e-05	0.00146	0.000641	0.000147	NS	NS	NS	NS	NS	0.00555	NS	NS	NS	NS	4.57e-05	4.1e-06	1.59e-05	0.02	0.00166
6163	purine nucleotide metabolic process (GO:0006163)	NS	NS	NS	NS	NS	0.0425	NS	0.00323	NS	2.31e-06	NS	NS	NS	NS	NS	0.00326	0.00153	0.000813	0.000217	NS	NS	NS	NS	NS	0.00297	NS	NS	0.0115	NS	NS
1901362	organic cyclic compound biosynthetic process (GO:1901362)	NS	NS	NS	NS	NS	3.06e-07	NS	NS	0.00872	NS	NS	NS	NS	NS	NS	2.02e-12	3.76e-11	2.24e-12	9.46e-08	2.2e-05	4.38e-05	NS	NS	NS	NS	2.47e-08	5.37e-05	1.05e-07	0.00267	NS
1901135	carbohydrate derivative metabolic process (GO:1901135)	NS	NS	NS	NS	NS	NS	NS	NS	NS	0.0222	NS	NS	NS	NS	NS	7.42e-05	0.000241	0.000569	1.87e-06	NS	NS	NS	NS	NS	0.0169	0.00666	0.0101	9.92e-05	0.000172	NS
9179	purine ribonucleoside diphosphate metabolic process (GO:0009179)	NS	NS	NS	NS	NS	0.0061	NS	1.64e-05	NS	7.22e-06	NS	NS	NS	NS	NS	0.00157	0.00125	0.00291	6.79e-05	NS	0.0342	NS	0.00523	NS	0.000515	NS	NS	NS	0.0106	NS
50794	regulation of cellular process (GO:0050794)	NS	NS	NS	NS	NS	0.00376	NS	NS	NS	NS	1.35e-19	2.59e-16	1.1e-18	3.17e-10	6.1e-07	NS	NS	NS	NS	NS	0.000317	NS	NS	NS	NS	1.33e-09	4.97e-13	2.34e-17	3.68e-06	1.78e-05
9966	regulation of signal transduction (GO:0009966)	NS	NS	NS	NS	NS	0.00323	NS	NS	NS	NS	7.6e-08	6.89e-12	3.55e-12	0.000685	0.000106	NS	NS	NS	NS	NS	0.00182	NS	0.0194	NS	NS	0.0011	5.89e-07	1.25e-06	0.0469	0.00232
10232	vascular transport (GO:0010232)	NS	NS	NS	NS	NS	NS	NS	0.00936	NS	NS	NS	NS	NS	NS	NS	NS	NS	0.0203	0.0108	NS	NS	NS	0.000742	0.00553	NS	NS	0.018	NS	NS	NS
5996	monosaccharide metabolic process (GO:0005996)	NS	NS	NS	NS	NS	0.00185	NS	8.77e-06	NS	3.92e-05	NS	NS	NS	NS	NS	0.00278	0.0163	0.0139	5.6e-05	NS	0.00225	0.0458	3.86e-06	NS	0.000408	NS	NS	NS	0.0176	NS
3013	circulatory system process (GO:0003013)	NS	NS	NS	NS	NS	NS	NS	0.00924	NS	NS	NS	NS	NS	NS	NS	NS	NS	0.0202	0.0107	NS	NS	NS	0.000729	0.00536	NS	NS	0.0179	NS	NS	NS
31326	regulation of cellular biosynthetic process (GO:0031326)	NS	NS	NS	NS	NS	0.00192	NS	NS	NS	NS	1.79e-08	0.000255	0.00686	0.00248	0.000455	NS	NS	NS	NS	NS	0.00483	NS	NS	NS	NS	0.0193	0.0141	0.0163	NS	NS
9185	ribonucleoside diphosphate metabolic process (GO:0009185)	NS	NS	NS	NS	NS	0.0122	NS	3.57e-05	NS	1.01e-05	NS	NS	NS	NS	NS	0.00156	0.00333	0.00779	0.000168	NS	NS	NS	0.00993	NS	0.000869	0.0188	NS	NS	0.00967	NS
61077	chaperone-mediated protein folding (GO:0061077)	NS	NS	NS	NS	NS	0.000255	NS	0.0143	0.0301	NS	NS	NS	NS	NS	NS	4.05e-09	2.97e-08	5.15e-08	0.000568	NS	0.0454	NS	NS	NS	NS	3.91e-05	7.15e-06	0.000103	0.0202	NS
6753	nucleoside phosphate metabolic process (GO:0006753)	NS	NS	NS	NS	NS	NS	NS	0.0275	NS	1.23e-05	NS	NS	NS	NS	NS	0.000342	0.00237	0.000114	0.000819	NS	NS	NS	NS	NS	0.0187	NS	NS	0.000941	NS	NS
48522	positive regulation of cellular process (GO:0048522)	NS	NS	NS	NS	NS	0.0107	NS	NS	NS	NS	3.47e-05	2.67e-06	0.000139	0.0188	NS	NS	NS	NS	NS	NS	0.0141	NS	NS	NS	NS	NS	0.00284	0.0111	NS	NS
48585	negative regulation of response to stimulus (GO:0048585)	NS	NS	NS	NS	NS	0.001	NS	NS	NS	NS	0.000228	1.8e-06	2.55e-06	0.00127	0.00712	NS	NS	NS	NS	NS	0.000619	NS	0.0066	NS	NS	0.00817	5.2e-06	8.9e-05	0.00263	0.0162
1900140	regulation of seedling development (GO:1900140)	NS	NS	NS	NS	NS	0.00376	NS	NS	NS	NS	2.31e-06	7.79e-05	2.53e-05	0.000344	7.09e-07	NS	NS	NS	NS	NS	0.000165	NS	0.0182	NS	NS	9.78e-05	3.87e-06	3.77e-06	9.61e-05	1.46e-06
62012	regulation of small molecule metabolic process (GO:0062012)	NS	NS	NS	NS	NS	0.000146	NS	NS	NS	NS	NS	NS	0.0273	NS	NS	NS	NS	NS	NS	NS	0.00178	NS	0.0332	NS	NS	0.000845	0.0259	NS	0.0487	NS
9144	purine nucleoside triphosphate metabolic process (GO:0009144)	NS	NS	NS	NS	NS	0.0438	NS	0.00473	NS	0.000385	NS	NS	NS	NS	NS	0.000347	2.68e-05	0.00309	0.000327	NS	NS	NS	NS	NS	0.0236	NS	0.0303	NS	NS	NS
9812	flavonoid metabolic process (GO:0009812)	NS	NS	NS	NS	NS	2.04e-10	2.31e-10	2.92e-08	1.27e-05	NS	NS	NS	NS	NS	NS	1.12e-05	1.03e-08	3.96e-09	6.64e-12	7.96e-12	1.08e-08	7.33e-09	6.27e-06	0.00158	NS	0.000359	2.11e-06	1.17e-06	8.47e-08	6e-09
9699	phenylpropanoid biosynthetic process (GO:0009699)	NS	NS	NS	NS	NS	3.67e-07	0.0478	0.0191	NS	1.61e-05	NS	NS	NS	NS	NS	NS	NS	0.0117	5.31e-05	0.00584	0.000159	NS	0.0243	NS	0.00218	NS	NS	NS	0.0264	NS
6006	glucose metabolic process (GO:0006006)	NS	NS	NS	NS	NS	0.000127	NS	5.61e-06	NS	4.12e-06	NS	NS	NS	NS	NS	9.73e-07	0.000284	5.52e-05	3.36e-06	NS	0.00448	NS	0.00209	NS	0.000246	0.00165	0.0193	0.00471	0.000993	NS
51171	regulation of nitrogen compound metabolic process (GO:0051171)	NS	NS	NS	NS	NS	0.000263	NS	NS	NS	NS	2.53e-05	0.014	NS	0.0316	0.00104	NS	NS	NS	NS	NS	0.00134	NS	NS	NS	NS	0.0259	0.00755	0.0216	NS	0.00229
6096	glycolytic process (GO:0006096)	NS	NS	NS	NS	NS	0.0159	NS	1.16e-05	NS	5.78e-06	NS	NS	NS	NS	NS	0.00301	0.00262	0.00193	4.68e-05	NS	NS	NS	0.00393	NS	0.000404	NS	NS	NS	0.00725	NS
9640	photomorphogenesis (GO:0009640)	NS	NS	NS	NS	NS	6.08e-05	0.00689	2.84e-05	0.0124	NS	NS	NS	NS	NS	NS	0.000982	0.00126	0.00435	9.96e-05	0.0114	0.0126	NS	0.000629	0.0167	NS	7.39e-06	0.000243	0.000342	1.72e-06	0.000374
5975	carbohydrate metabolic process (GO:0005975)	NS	NS	NS	NS	NS	5.9e-08	1.46e-06	4.51e-13	NS	5.46e-05	NS	NS	NS	NS	NS	0.000149	0.00383	0.000256	0.000583	0.0163	2.47e-09	4.99e-07	9.37e-12	0.000451	7.6e-05	0.000379	0.00118	4.48e-05	0.000202	0.000594
9266	response to temperature stimulus (GO:0009266)	NS	NS	NS	NS	NS	3.38e-33	3.83e-07	4.5e-16	6.98e-16	0.0041	NS	NS	NS	NS	NS	1.98e-24	2.4e-15	2.77e-15	6.78e-10	1.2e-05	2.45e-22	0.00455	1.47e-09	8.41e-09	NS	8.99e-19	4.66e-16	1.81e-16	1.38e-08	2.13e-06
10565	regulation of cellular ketone metabolic process (GO:0010565)	NS	NS	NS	NS	NS	0.00457	NS	NS	NS	NS	NS	NS	0.0386	NS	NS	NS	NS	NS	NS	NS	0.00609	NS	NS	NS	NS	0.0177	NS	NS	NS	NS
80090	regulation of primary metabolic process (GO:0080090)	NS	NS	NS	NS	NS	0.0011	NS	NS	NS	NS	3.54e-05	0.0144	NS	NS	0.00219	NS	NS	NS	NS	NS	0.00301	NS	NS	NS	NS	0.0256	0.00266	0.0185	NS	0.00623
15995	chlorophyll biosynthetic process (GO:0015995)	NS	NS	NS	NS	NS	0.000154	NS	NS	0.0406	NS	NS	NS	NS	NS	NS	1.09e-10	3.97e-08	4.27e-09	0.000778	4.29e-06	0.0127	NS	NS	NS	NS	7.87e-06	6.42e-05	5.76e-06	NS	0.00299
1901617	organic hydroxy compound biosynthetic process (GO:1901617)	NS	NS	NS	NS	NS	3.3e-05	0.00153	2.88e-06	0.000296	NS	NS	NS	NS	NS	NS	8.21e-05	0.000228	0.0202	3.72e-06	0.00104	4.92e-05	0.031	0.000156	0.0174	NS	0.00177	0.000606	0.043	4.92e-06	0.0018
44550	secondary metabolite biosynthetic process (GO:0044550)	NS	NS	NS	NS	NS	6.78e-07	0.0368	0.0226	NS	0.000115	NS	NS	NS	NS	NS	9.03e-06	5.45e-05	0.000424	3.65e-11	8.46e-05	3.06e-05	0.00212	0.00312	NS	0.00136	0.000282	6.27e-05	0.000389	1.26e-07	0.0279
48518	positive regulation of biological process (GO:0048518)	NS	NS	NS	NS	NS	0.000874	NS	NS	NS	NS	3.99e-11	2.89e-12	1.35e-11	2.87e-06	0.000867	NS	NS	NS	NS	NS	0.000214	0.043	0.0259	NS	NS	0.000761	1.92e-06	6.71e-07	0.000159	0.00603
19364	pyridine nucleotide catabolic process (GO:0019364)	NS	NS	NS	NS	NS	0.00605	NS	2.61e-06	NS	6.66e-06	NS	NS	NS	NS	NS	0.00156	0.00124	0.000946	1.45e-05	NS	0.0338	NS	0.00154	NS	0.000498	NS	NS	NS	0.00389	NS
46364	monosaccharide biosynthetic process (GO:0046364)	NS	NS	NS	NS	NS	NS	NS	0.00943	NS	0.0327	NS	NS	NS	NS	NS	6.5e-05	0.000867	0.00195	1.68e-05	NS	NS	NS	0.022	NS	NS	0.00455	0.00523	0.00764	0.000768	NS
9408	response to heat (GO:0009408)	NS	NS	NS	NS	NS	9.83e-15	7.11e-06	1.39e-10	1.46e-09	NS	NS	NS	NS	NS	NS	3.29e-08	1.07e-07	2.1e-07	8.88e-06	0.00729	8.86e-09	0.00351	6.72e-07	2.24e-05	NS	3.09e-05	2.7e-05	3.89e-07	0.00134	0.0443
71483	cellular response to blue light (GO:0071483)	NS	NS	NS	NS	NS	0.000116	0.000166	0.000435	0.000864	NS	NS	NS	NS	NS	NS	0.000659	0.00108	0.00792	0.000184	5.66e-05	0.00573	0.00621	0.0164	0.0143	NS	6.93e-05	0.000316	0.00119	0.000576	4.34e-05
9074	aromatic amino acid family catabolic process (GO:0009074)	NS	NS	NS	NS	NS	0.0369	NS	NS	NS	NS	NS	0.00544	0.0402	0.0498	NS	NS	NS	NS	NS	NS	0.00157	NS	NS	NS	NS	NS	0.0119	NS	0.0445	NS
46148	pigment biosynthetic process (GO:0046148)	NS	NS	NS	NS	NS	2.23e-13	3.76e-07	4.42e-06	3.98e-07	NS	NS	NS	NS	NS	NS	8.74e-16	1.87e-16	9.38e-19	8.32e-13	2.51e-13	7e-10	0.000279	0.00353	0.000256	NS	6.33e-09	2.58e-11	1.64e-13	4.27e-08	3.95e-10
33014	tetrapyrrole biosynthetic process (GO:0033014)	NS	NS	NS	NS	NS	1.39e-05	NS	NS	0.0122	NS	NS	NS	NS	NS	NS	2.53e-12	2.31e-08	4.19e-09	0.00115	8.14e-06	0.00389	NS	NS	NS	NS	6e-07	4.23e-05	7.47e-06	NS	0.00213
19222	regulation of metabolic process (GO:0019222)	NS	NS	NS	NS	NS	0.000791	NS	NS	NS	NS	1.72e-09	2.68e-05	0.00336	0.0022	0.000206	NS	NS	NS	NS	NS	0.00274	NS	NS	NS	NS	2.74e-05	1.7e-06	2.3e-05	0.0231	0.00161
72521	purine-containing compound metabolic process (GO:0072521)	NS	NS	NS	NS	NS	NS	NS	0.0031	NS	5.03e-06	NS	NS	NS	NS	NS	0.00293	0.00262	0.00143	0.000809	NS	NS	NS	NS	NS	0.0022	NS	NS	0.00456	NS	NS
9132	nucleoside diphosphate metabolic process (GO:0009132)	NS	NS	NS	NS	NS	0.0305	NS	0.000114	NS	2.28e-05	NS	NS	NS	NS	NS	0.00269	0.012	0.0151	0.000142	NS	NS	NS	0.00833	NS	0.00199	0.0135	NS	NS	0.00213	NS
51552	flavone metabolic process (GO:0051552)	NS	NS	NS	NS	NS	0.000208	6.63e-05	0.00173	0.00043	NS	NS	NS	NS	NS	NS	NS	0.00578	0.0338	0.0028	NS	0.00028	0.000304	0.00712	0.00744	NS	NS	0.00329	NS	0.0443	0.0114
9199	ribonucleoside triphosphate metabolic process (GO:0009199)	NS	NS	NS	NS	NS	NS	NS	0.00828	NS	0.000619	NS	NS	NS	NS	NS	0.000435	0.000111	0.00172	0.000254	NS	NS	NS	NS	NS	0.0363	NS	0.0208	NS	0.0468	NS
42440	pigment metabolic process (GO:0042440)	NS	NS	NS	NS	NS	5.94e-14	6.71e-07	1.73e-05	5.2e-07	NS	NS	NS	NS	NS	NS	3.77e-17	8.79e-17	2.83e-19	1.2e-14	3.79e-13	4.41e-10	0.000237	0.00652	0.000504	NS	4.51e-10	4.08e-12	3.39e-14	2.67e-09	3.57e-10
46031	ADP metabolic process (GO:0046031)	NS	NS	NS	NS	NS	0.00613	NS	1.66e-05	NS	7.53e-06	NS	NS	NS	NS	NS	0.00158	0.00126	0.00292	6.85e-05	NS	0.0343	NS	0.00526	NS	0.000523	NS	NS	NS	0.0106	NS
9658	chloroplast organization (GO:0009658)	NS	NS	NS	NS	NS	2.5e-06	NS	0.000237	0.00703	NS	NS	NS	NS	NS	NS	3e-27	3.37e-24	8.01e-29	1.33e-07	3.71e-08	0.0212	NS	NS	NS	NS	8.21e-14	2.25e-14	1.1e-14	0.0376	0.00568
51239	regulation of multicellular organismal process (GO:0051239)	NS	NS	NS	NS	NS	0.0468	NS	NS	NS	NS	3.52e-06	0.000112	0.00211	0.000489	0.00104	NS	NS	NS	NS	NS	0.0181	NS	NS	0.0334	NS	0.00186	4.22e-05	0.000622	0.00448	0.0104
31325	positive regulation of cellular metabolic process (GO:0031325)	NS	NS	NS	NS	NS	0.00284	NS	NS	NS	NS	0.00405	0.00186	0.0112	0.0249	NS	NS	NS	NS	NS	NS	0.0279	NS	NS	NS	NS	NS	0.00965	0.0205	NS	NS
44283	small molecule biosynthetic process (GO:0044283)	NS	NS	NS	NS	NS	4.52e-07	NS	3.66e-06	0.0294	0.00908	NS	NS	NS	NS	NS	3.94e-28	9.54e-14	1.02e-19	6.89e-19	0.00102	2.49e-05	NS	0.000443	0.0239	NS	2.94e-16	7.21e-08	1.32e-14	1.1e-10	0.0286
23051	regulation of signaling (GO:0023051)	NS	NS	NS	NS	NS	0.00382	NS	NS	NS	NS	1.69e-07	1.27e-11	1.07e-11	0.000857	0.000138	NS	NS	NS	NS	NS	0.00221	NS	0.0216	NS	NS	0.0016	3.73e-07	8.43e-07	NS	0.00371
51554	flavonol metabolic process (GO:0051554)	NS	NS	NS	NS	NS	0.00021	6.88e-05	0.00174	0.00044	NS	NS	NS	NS	NS	NS	NS	0.0058	0.0339	0.00281	NS	0.000282	0.000308	0.00716	0.00754	NS	NS	0.0033	NS	0.0444	0.0114
71492	cellular response to UV-A (GO:0071492)	NS	NS	NS	NS	NS	0.000457	NS	0.00345	0.0317	NS	NS	NS	NS	NS	NS	0.00325	0.00234	0.00246	0.00996	NS	0.00274	NS	0.0161	NS	NS	0.0286	0.0193	0.0243	NS	NS
71478	cellular response to radiation (GO:0071478)	NS	NS	NS	NS	NS	6.97e-08	3.57e-06	1.24e-06	3.3e-05	8.15e-05	NS	NS	NS	NS	NS	6.26e-07	3.34e-06	9.56e-06	2.1e-05	4.24e-06	4.12e-05	0.00476	0.00165	0.00605	0.00964	4.28e-09	3.78e-06	8.72e-08	7.91e-06	3.19e-06
45037	protein import into chloroplast stroma (GO:0045037)	NS	NS	NS	NS	NS	NS	NS	NS	NS	NS	NS	NS	NS	NS	NS	0.000126	0.0045	8.38e-05	NS	NS	NS	NS	NS	NS	NS	0.00135	NS	0.0127	NS	NS
9624	response to nematode (GO:0009624)	NS	NS	NS	NS	NS	0.00146	NS	NS	NS	NS	NS	NS	NS	NS	0.0381	NS	NS	NS	NS	NS	0.00045	NS	0.0242	NS	NS	NS	NS	NS	NS	0.000278
9205	purine ribonucleoside triphosphate metabolic process (GO:0009205)	NS	NS	NS	NS	NS	0.0325	NS	0.00345	NS	0.000295	NS	NS	NS	NS	NS	0.000473	3.79e-05	0.00135	0.000213	NS	NS	NS	NS	NS	0.0189	NS	0.0361	NS	NS	NS
43632	modification-dependent macromolecule catabolic process (GO:0043632)	NS	NS	NS	NS	NS	0.00187	NS	NS	NS	NS	0.00127	4.66e-05	0.000766	0.00478	NS	1.41e-05	0.000567	2.83e-05	NS	NS	NS	NS	NS	NS	NS	NS	NS	NS	NS	NS
6195	purine nucleotide catabolic process (GO:0006195)	NS	NS	NS	NS	NS	0.0159	NS	8.24e-06	NS	1.25e-05	NS	NS	NS	NS	NS	0.00641	0.00453	0.00405	5.39e-05	NS	NS	NS	0.00403	NS	0.00106	NS	NS	NS	0.0053	NS
9411	response to UV (GO:0009411)	NS	NS	NS	NS	NS	1.99e-07	2.33e-05	2.55e-08	0.00451	NS	NS	NS	NS	NS	NS	9.2e-08	9.75e-05	1.56e-05	5.15e-09	4.43e-08	9.83e-06	0.00212	2.08e-05	NS	NS	6.69e-08	0.000198	0.000176	1.02e-07	1.38e-05
51555	flavonol biosynthetic process (GO:0051555)	NS	NS	NS	NS	NS	0.000147	6.12e-05	0.0014	0.000387	NS	NS	NS	NS	NS	NS	NS	0.00424	0.0263	0.00211	0.044	0.00109	0.00234	0.0271	0.00634	NS	NS	0.002	NS	0.0347	0.00862
19438	aromatic compound biosynthetic process (GO:0019438)	NS	NS	NS	NS	NS	0.000454	NS	NS	NS	NS	NS	NS	NS	NS	NS	5.85e-09	5.47e-08	6.75e-10	3.77e-05	0.000823	0.0132	NS	NS	NS	NS	6.73e-06	0.00333	2.75e-06	0.0421	NS
42548	regulation of photosynthesis, light reaction (GO:0042548)	NS	NS	NS	NS	NS	0.0012	NS	NS	NS	NS	NS	NS	NS	NS	NS	9.63e-06	2.21e-07	6.42e-06	0.0105	NS	0.0327	NS	NS	NS	NS	5.35e-05	4.16e-05	0.00084	NS	NS
43155	negative regulation of photosynthesis, light reaction (GO:0043155)	NS	NS	NS	NS	NS	3.46e-05	NS	NS	NS	NS	NS	NS	NS	NS	NS	0.000111	5.11e-05	0.000906	0.0256	NS	0.000799	NS	NS	NS	NS	0.001	0.00039	0.0068	NS	NS
51480	regulation of cytosolic calcium ion concentration (GO:0051480)	NS	NS	NS	NS	NS	NS	NS	NS	NS	NS	0.00508	0.000187	0.0051	NS	NS	NS	NS	NS	NS	NS	NS	NS	NS	NS	NS	NS	0.000288	0.00834	NS	NS
10143	cutin biosynthetic process (GO:0010143)	NS	NS	NS	NS	NS	0.00605	NS	NS	NS	NS	NS	NS	NS	NS	NS	0.00223	0.000881	4.65e-05	0.0132	NS	0.0225	NS	NS	NS	NS	0.00148	0.000398	0.000264	0.0094	NS
6778	porphyrin-containing compound metabolic process (GO:0006778)	NS	NS	NS	NS	NS	2.08e-05	NS	NS	NS	NS	NS	NS	NS	NS	NS	8.1e-12	3.69e-08	7e-10	9.96e-06	3.73e-06	0.0155	NS	NS	NS	NS	9.13e-06	2.8e-05	7.21e-06	0.00177	0.000426
46283	anthocyanin-containing compound metabolic process (GO:0046283)	NS	NS	NS	NS	NS	0.0158	NS	NS	NS	NS	NS	NS	NS	NS	NS	0.00849	0.000766	9.01e-06	1.94e-05	3.89e-06	0.017	NS	NS	NS	NS	0.0406	0.0115	3.88e-06	0.00037	0.000203
46394	carboxylic acid biosynthetic process (GO:0046394)	NS	NS	NS	NS	NS	0.000262	NS	NS	NS	NS	NS	NS	NS	NS	NS	1.18e-18	2.47e-08	1.24e-13	6.35e-10	NS	0.00156	NS	NS	NS	NS	8.01e-11	0.000429	3.15e-10	0.000266	NS
43170	macromolecule metabolic process (GO:0043170)	0.00807	0.0133	0.000646	NS	0.0308	NS	0.0289	NS	NS	0.000599	1.75e-07	0.0143	NS	0.0108	NS	0.00134	0.00495	3.98e-12	NS	NS	7.52e-05	1.83e-05	4.57e-06	0.000949	1.1e-06	3.42e-12	5.09e-06	1.22e-12	NS	NS
19941	modification-dependent protein catabolic process (GO:0019941)	NS	NS	NS	NS	NS	0.00236	NS	NS	NS	NS	0.0014	6.73e-05	0.000345	0.00286	NS	2.88e-05	0.000885	7.23e-05	NS	NS	NS	NS	NS	NS	NS	NS	NS	NS	NS	NS
43412	macromolecule modification (GO:0043412)	NS	NS	NS	NS	NS	0.000926	0.00152	NS	0.000864	0.000624	4.98e-10	6.37e-10	1.48e-11	7.87e-08	NS	5.63e-09	4.74e-07	0.000292	0.0181	0.0174	0.0127	0.0456	NS	0.000328	0.000939	NS	NS	NS	NS	NS
9085	lysine biosynthetic process (GO:0009085)	NS	NS	NS	NS	NS	NS	NS	NS	NS	NS	NS	NS	NS	NS	NS	0.00223	0.0051	0.00153	NS	NS	NS	NS	NS	NS	NS	0.0403	NS	0.0332	NS	NS
170040	proteinogenic amino acid catabolic process (GO:0170040)	NS	NS	NS	NS	NS	NS	NS	NS	NS	NS	NS	0.000503	0.00516	0.000758	0.00455	NS	NS	0.0372	0.00161	NS	0.000826	NS	0.0195	NS	NS	0.000922	6.81e-06	1.27e-05	4e-08	0.000106
170035	L-amino acid catabolic process (GO:0170035)	NS	NS	NS	NS	NS	NS	NS	NS	NS	NS	NS	0.0005	0.00515	0.000751	0.00452	NS	NS	0.0371	0.0016	NS	0.000821	NS	0.0194	NS	NS	0.000918	6.76e-06	1.26e-05	3.93e-08	0.000105
42371	vitamin K biosynthetic process (GO:0042371)	NS	NS	NS	NS	NS	NS	NS	NS	NS	NS	NS	NS	NS	NS	NS	0.00998	0.00545	0.0422	NS	NS	NS	NS	NS	NS	NS	NS	0.0218	NS	NS	NS
6793	phosphorus metabolic process (GO:0006793)	NS	NS	NS	NS	NS	NS	NS	NS	NS	NS	0.00111	0.0316	2.57e-10	0.00967	NS	NS	NS	0.0134	0.0362	NS	0.042	NS	NS	NS	NS	9.3e-05	0.00563	4.29e-13	5.05e-05	NS
44271	cellular nitrogen compound biosynthetic process (GO:0044271)	NS	NS	NS	NS	NS	NS	NS	NS	NS	NS	NS	0.00186	NS	NS	NS	7.14e-43	5.54e-26	1.33e-50	7.66e-07	NS	NS	NS	0.0243	NS	NS	6.37e-20	3.1e-08	8.01e-25	NS	NS
22402	cell cycle process (GO:0022402)	NS	NS	0.00947	NS	NS	NS	NS	NS	NS	NS	NS	NS	0.00464	NS	NS	6.82e-08	1.57e-11	1.12e-23	1.13e-09	7.57e-18	NS	NS	NS	NS	NS	0.00694	0.00032	9.2e-09	0.00963	4.31e-07
7049	cell cycle (GO:0007049)	NS	NS	0.00376	NS	NS	NS	NS	NS	NS	NS	NS	NS	0.0107	0.0386	0.0253	7.31e-09	6.43e-13	1.51e-26	8.29e-10	9.32e-18	NS	NS	NS	NS	NS	0.00403	0.000105	1.78e-10	0.0238	2.1e-06
42373	vitamin K metabolic process (GO:0042373)	NS	NS	NS	NS	NS	NS	NS	NS	NS	NS	NS	NS	NS	NS	NS	0.01	0.00546	0.0423	NS	NS	NS	NS	NS	NS	NS	NS	0.0219	NS	NS	NS
9165	nucleotide biosynthetic process (GO:0009165)	NS	NS	NS	NS	NS	NS	NS	NS	NS	NS	NS	NS	NS	NS	NS	0.014	0.007	0.000429	NS	NS	NS	NS	NS	NS	NS	NS	NS	0.00684	NS	NS
1901293	nucleoside phosphate biosynthetic process (GO:1901293)	NS	NS	NS	NS	NS	NS	NS	NS	NS	NS	NS	NS	NS	NS	NS	0.014	0.00702	0.00043	NS	NS	NS	NS	NS	NS	NS	NS	NS	0.00685	NS	NS
10258	NADH dehydrogenase complex (plastoquinone) assembly (GO:0010258)	NS	NS	NS	NS	NS	NS	NS	NS	NS	NS	NS	NS	NS	NS	NS	6.29e-05	0.00765	0.000857	NS	NS	NS	NS	NS	NS	NS	0.00311	NS	0.0222	NS	NS
22900	electron transport chain (GO:0022900)	NS	NS	NS	NS	NS	0.0006	NS	NS	NS	NS	NS	NS	NS	NS	NS	8.89e-09	1.37e-07	0.000127	0.0125	NS	0.0292	NS	NS	NS	NS	6.27e-06	9.91e-05	0.0182	0.019	NS
10207	photosystem II assembly (GO:0010207)	NS	NS	NS	NS	NS	0.000934	NS	NS	NS	NS	NS	NS	NS	NS	NS	9.14e-08	1.27e-08	2.45e-05	0.000238	NS	0.0268	NS	NS	NS	NS	0.000598	0.000115	0.0243	0.0433	NS
9664	plant-type cell wall organization (GO:0009664)	NS	NS	NS	NS	0.0242	NS	0.000928	NS	NS	NS	NS	NS	NS	NS	NS	NS	NS	NS	NS	NS	NS	0.00661	NS	NS	NS	NS	NS	NS	NS	NS
9759	indole glucosinolate biosynthetic process (GO:0009759)	NS	0.00163	NS	NS	NS	NS	NS	NS	NS	NS	NS	NS	NS	NS	NS	NS	NS	NS	NS	NS	0.0282	0.00609	NS	NS	NS	NS	NS	NS	0.0375	NS
55085	transmembrane transport (GO:0055085)	0.00895	NS	0.00324	NS	NS	NS	NS	0.00469	0.028	0.000127	NS	0.0015	NS	NS	NS	NS	NS	NS	NS	NS	0.000227	NS	8.29e-07	NS	0.00156	0.0187	0.000332	0.0179	NS	NS
6995	cellular response to nitrogen starvation (GO:0006995)	NS	NS	0.0425	NS	NS	NS	NS	NS	NS	NS	NS	NS	0.0337	NS	NS	NS	NS	NS	NS	NS	NS	NS	0.0249	NS	NS	NS	NS	NS	NS	NS
2000022	regulation of jasmonic acid mediated signaling pathway (GO:2000022)	NS	0.0412	NS	NS	NS	NS	NS	NS	NS	NS	NS	0.0111	0.00072	NS	NS	NS	NS	NS	NS	NS	NS	0.0454	NS	NS	NS	NS	NS	NS	NS	NS
43562	cellular response to nitrogen levels (GO:0043562)	NS	NS	0.0267	NS	NS	NS	NS	NS	NS	NS	NS	NS	0.00251	0.0427	0.00617	NS	NS	NS	NS	NS	NS	NS	0.00749	NS	0.0114	NS	NS	NS	NS	NS
140255	regulation of cellular response to phosphate starvation (GO:0140255)	NS	0.0403	NS	NS	0.0339	NS	NS	NS	NS	NS	NS	NS	0.0199	NS	NS	NS	NS	NS	NS	NS	NS	NS	NS	NS	0.0364	NS	NS	NS	NS	NS
80040	positive regulation of cellular response to phosphate starvation (GO:0080040)	NS	0.0397	NS	NS	0.0308	NS	NS	NS	NS	NS	NS	NS	0.0197	NS	NS	NS	NS	NS	NS	NS	NS	NS	NS	NS	0.0355	NS	NS	NS	NS	NS
9395	phospholipid catabolic process (GO:0009395)	0.0179	NS	0.0233	NS	NS	NS	NS	NS	NS	NS	0.000171	0.0028	0.023	0.0072	NS	NS	NS	NS	NS	NS	NS	NS	0.0223	NS	NS	0.00361	NS	NS	0.0268	NS
71702	organic substance transport (GO:0071702)	NS	NS	NS	NS	NS	NS	NS	NS	NS	NS	0.00115	0.00949	0.00101	NS	NS	NS	NS	NS	NS	NS	NS	NS	NS	NS	NS	0.0116	NS	NS	NS	NS
6974	DNA damage response (GO:0006974)	NS	NS	0.0292	NS	NS	NS	NS	NS	NS	NS	NS	NS	NS	NS	NS	NS	NS	0.000309	NS	NS	0.00041	NS	0.019	NS	NS	NS	NS	NS	NS	NS
71462	cellular response to water stimulus (GO:0071462)	NS	NS	NS	NS	NS	NS	NS	NS	NS	0.0229	NS	NS	NS	NS	NS	NS	NS	NS	NS	NS	NS	NS	NS	NS	0.00588	NS	0.0204	NS	NS	NS
19253	reductive pentose-phosphate cycle (GO:0019253)	NS	NS	NS	NS	NS	0.00234	NS	NS	NS	NS	NS	NS	NS	NS	NS	1.07e-05	5.13e-05	8.66e-05	0.000836	NS	0.0259	NS	NS	NS	NS	0.000323	0.00557	0.0103	0.0367	NS
6833	water transport (GO:0006833)	NS	NS	NS	NS	NS	NS	NS	0.0142	NS	NS	NS	NS	NS	NS	NS	NS	NS	NS	NS	NS	0.0142	NS	NS	NS	NS	NS	NS	0.0401	NS	NS
33013	tetrapyrrole metabolic process (GO:0033013)	NS	NS	NS	NS	NS	3e-05	NS	NS	NS	NS	NS	NS	NS	NS	NS	5.73e-13	3.13e-09	5.29e-11	1.42e-05	4.83e-06	0.0176	NS	NS	NS	NS	1.41e-06	6.89e-06	1.01e-06	0.00252	0.000586
42044	fluid transport (GO:0042044)	NS	NS	NS	NS	NS	NS	NS	0.0141	NS	NS	NS	NS	NS	NS	NS	NS	NS	NS	NS	NS	0.0142	NS	NS	NS	NS	NS	NS	0.0399	NS	NS
42631	cellular response to water deprivation (GO:0042631)	NS	NS	NS	NS	NS	NS	NS	NS	NS	0.0213	NS	NS	NS	NS	NS	NS	NS	NS	NS	NS	NS	NS	NS	NS	0.00539	NS	0.0167	NS	NS	NS
34285	response to disaccharide (GO:0034285)	NS	NS	NS	NS	NS	0.0356	NS	NS	NS	NS	NS	NS	NS	NS	NS	NS	NS	0.0126	NS	NS	0.00204	NS	NS	NS	NS	0.042	0.0083	0.000664	0.00787	0.0322
44237	cellular metabolic process (GO:0044237)	NS	NS	NS	NS	NS	1.56e-07	NS	NS	NS	NS	NS	NS	NS	NS	NS	4.91e-63	2.06e-46	1.67e-68	1.63e-21	2.21e-05	0.000159	NS	NS	NS	NS	7.41e-51	8.38e-32	1.19e-51	4.67e-14	NS
16053	organic acid biosynthetic process (GO:0016053)	NS	NS	NS	NS	NS	0.000264	NS	NS	NS	NS	NS	NS	NS	NS	NS	1.21e-18	2.5e-08	1.27e-13	6.57e-10	NS	0.00157	NS	NS	NS	NS	8.11e-11	0.000431	3.18e-10	0.000268	NS
43467	regulation of generation of precursor metabolites and energy (GO:0043467)	NS	NS	NS	NS	NS	0.00193	NS	NS	NS	NS	NS	NS	NS	NS	NS	2.46e-05	6.81e-07	1.67e-05	0.0148	NS	0.0478	NS	NS	NS	NS	0.000178	0.000134	0.00224	NS	NS
19685	photosynthesis, dark reaction (GO:0019685)	NS	NS	NS	NS	NS	0.00349	NS	NS	NS	NS	NS	NS	NS	NS	NS	2.55e-05	0.000102	0.000182	0.00127	NS	0.0357	NS	NS	NS	NS	0.000811	0.0104	0.0181	NS	NS
9767	photosynthetic electron transport chain (GO:0009767)	NS	NS	NS	NS	NS	0.000455	NS	NS	NS	NS	NS	NS	NS	NS	NS	3.58e-14	1.74e-13	1.27e-09	2.57e-06	NS	0.0302	NS	NS	NS	NS	6.28e-08	1.06e-07	8.41e-05	0.00264	NS
15977	carbon fixation (GO:0015977)	NS	NS	NS	NS	NS	0.000394	NS	NS	NS	NS	NS	NS	NS	NS	NS	2.58e-05	0.000105	0.000184	0.00129	NS	0.00733	NS	NS	NS	NS	0.00082	0.0105	0.0183	NS	NS
10205	photoinhibition (GO:0010205)	NS	NS	NS	NS	NS	3.42e-05	NS	NS	NS	NS	NS	NS	NS	NS	NS	0.00011	5.07e-05	0.000894	0.0255	NS	0.000794	NS	NS	NS	NS	0.00099	0.000388	0.00668	NS	NS
15994	chlorophyll metabolic process (GO:0015994)	NS	NS	NS	NS	NS	0.000149	NS	NS	NS	NS	NS	NS	NS	NS	NS	3.32e-12	1.04e-08	1.19e-11	3.89e-06	1.96e-06	0.0239	NS	NS	NS	NS	2.95e-06	7.37e-06	1.31e-07	0.00117	0.000426
19362	pyridine nucleotide metabolic process (GO:0019362)	NS	NS	NS	NS	NS	0.00151	0.0402	9.25e-08	NS	6.57e-08	NS	NS	NS	NS	NS	0.00629	0.0389	0.0186	0.000466	0.0466	0.0118	NS	0.000394	NS	3.57e-05	NS	NS	NS	NS	NS
72524	pyridine-containing compound metabolic process (GO:0072524)	NS	NS	NS	NS	NS	0.00399	NS	6.42e-08	NS	1.03e-07	NS	NS	NS	NS	NS	0.00432	NS	0.0121	0.000141	NS	0.0175	NS	0.000393	NS	7.73e-05	NS	NS	NS	NS	NS
46034	ATP metabolic process (GO:0046034)	NS	NS	NS	NS	NS	0.0403	NS	0.00179	NS	0.000168	NS	NS	NS	NS	NS	0.00177	7.69e-05	0.00237	0.000914	NS	NS	NS	NS	NS	0.0128	NS	NS	NS	NS	NS
72330	monocarboxylic acid biosynthetic process (GO:0072330)	NS	NS	NS	NS	NS	0.000271	NS	NS	NS	NS	NS	NS	NS	NS	NS	1.47e-10	2e-06	4.51e-11	3.75e-06	0.0359	0.0114	NS	NS	NS	NS	5.39e-06	0.000787	4.88e-08	0.0083	NS
51156	glucose 6-phosphate metabolic process (GO:0051156)	NS	NS	NS	NS	NS	0.00794	NS	7.05e-06	NS	0.00163	NS	NS	NS	NS	NS	NS	NS	NS	0.0413	NS	NS	NS	0.00177	NS	0.0266	NS	NS	NS	NS	NS
46496	nicotinamide nucleotide metabolic process (GO:0046496)	NS	NS	NS	NS	NS	0.00138	0.0392	8.27e-08	NS	7.36e-08	NS	NS	NS	NS	NS	0.00588	0.0368	0.0179	0.000423	0.0446	0.0108	NS	0.000355	NS	3.33e-05	NS	NS	NS	NS	NS
140694	non-membrane-bounded organelle assembly (GO:0140694)	NS	NS	NS	NS	NS	NS	NS	NS	NS	NS	NS	NS	NS	NS	NS	0.00229	0.0112	9.67e-05	NS	NS	NS	NS	NS	NS	NS	0.0499	NS	NS	NS	NS
6635	fatty acid beta-oxidation (GO:0006635)	NS	NS	NS	NS	NS	NS	NS	NS	NS	NS	0.0259	0.00366	0.000665	NS	NS	NS	NS	NS	NS	NS	NS	NS	NS	NS	NS	NS	NS	0.0248	NS	NS
9648	photoperiodism (GO:0009648)	NS	NS	NS	NS	NS	NS	NS	NS	NS	NS	0.00126	0.0154	0.00422	NS	NS	NS	NS	NS	NS	NS	NS	NS	NS	NS	NS	6.92e-05	0.000153	0.000988	0.0111	NS
1901136	carbohydrate derivative catabolic process (GO:1901136)	NS	NS	NS	NS	NS	NS	NS	0.017	NS	0.000548	NS	NS	NS	NS	NS	NS	NS	NS	0.0407	NS	NS	NS	0.05	NS	0.0144	NS	NS	NS	NS	NS
6259	DNA metabolic process (GO:0006259)	NS	NS	NS	NS	NS	0.00508	NS	NS	NS	NS	NS	NS	0.00975	NS	0.0201	NS	NS	8.08e-07	NS	NS	0.000179	NS	0.00234	0.046	NS	NS	NS	NS	NS	NS
43648	dicarboxylic acid metabolic process (GO:0043648)	NS	NS	NS	NS	NS	NS	NS	NS	NS	NS	NS	NS	NS	NS	NS	6.32e-07	0.0132	0.000367	NS	NS	NS	NS	NS	NS	NS	0.000509	0.0133	0.0172	NS	NS
43153	entrainment of circadian clock by photoperiod (GO:0043153)	NS	NS	NS	NS	NS	NS	NS	NS	NS	NS	0.00182	0.00132	0.0019	NS	NS	NS	NS	NS	NS	NS	NS	NS	NS	NS	NS	0.0302	0.0193	0.0256	NS	NS
71365	cellular response to auxin stimulus (GO:0071365)	NS	NS	NS	NS	NS	NS	NS	NS	NS	NS	4.19e-06	0.00754	0.00831	NS	NS	NS	NS	NS	NS	NS	NS	NS	NS	NS	NS	0.00173	NS	NS	NS	NS
10647	positive regulation of cell communication (GO:0010647)	NS	NS	NS	NS	NS	NS	NS	NS	NS	NS	0.0281	0.00602	0.000891	NS	NS	NS	NS	NS	NS	NS	NS	NS	NS	NS	NS	NS	NS	0.0475	NS	NS
1901419	regulation of response to alcohol (GO:1901419)	NS	NS	NS	NS	NS	0.0208	NS	NS	NS	NS	0.0104	0.000615	0.0106	NS	NS	NS	NS	NS	NS	NS	NS	NS	NS	NS	NS	NS	NS	NS	NS	NS
23056	positive regulation of signaling (GO:0023056)	NS	NS	NS	NS	NS	NS	NS	NS	NS	NS	0.0402	0.00948	0.00865	NS	NS	NS	NS	NS	NS	NS	NS	NS	NS	NS	NS	NS	NS	NS	NS	NS
6796	phosphate-containing compound metabolic process (GO:0006796)	NS	NS	NS	NS	NS	NS	NS	NS	NS	NS	0.000909	0.0163	9.7e-11	0.00969	NS	NS	NS	NS	NS	NS	0.048	NS	NS	NS	NS	0.000463	0.0094	5.58e-12	0.000117	NS
1900458	negative regulation of brassinosteroid mediated signaling pathway (GO:1900458)	NS	NS	NS	NS	NS	NS	NS	NS	NS	NS	0.0488	0.0362	0.00511	NS	NS	NS	NS	NS	NS	NS	NS	NS	NS	NS	NS	NS	NS	NS	NS	NS
34284	response to monosaccharide (GO:0034284)	NS	NS	NS	NS	NS	NS	NS	NS	NS	NS	0.00691	0.0274	NS	0.0234	0.00524	NS	NS	NS	NS	NS	NS	0.0203	0.03	NS	0.00594	0.00244	0.00348	0.0382	0.00292	0.0363
959	mitochondrial RNA metabolic process (GO:0000959)	NS	NS	NS	NS	NS	NS	NS	NS	NS	NS	NS	0.0272	0.0115	NS	NS	NS	NS	NS	NS	NS	0.0199	NS	NS	NS	NS	0.00437	0.026	NS	NS	NS
12501	programmed cell death (GO:0012501)	NS	NS	NS	NS	NS	NS	NS	NS	NS	NS	3.57e-05	0.0066	0.00221	0.00206	0.042	NS	NS	NS	NS	NS	0.025	NS	NS	NS	NS	0.0326	NS	NS	0.0342	NS
9746	response to hexose (GO:0009746)	NS	NS	NS	NS	NS	NS	NS	NS	NS	NS	0.0193	NS	NS	NS	0.0408	NS	NS	NS	NS	NS	NS	0.0144	0.0213	0.0418	0.0043	0.0108	0.0167	NS	0.0117	NS
9967	positive regulation of signal transduction (GO:0009967)	NS	NS	NS	NS	NS	NS	NS	NS	NS	NS	0.0264	0.00852	0.0081	NS	NS	NS	NS	NS	NS	NS	NS	NS	NS	NS	NS	NS	NS	NS	NS	NS
19722	calcium-mediated signaling (GO:0019722)	NS	NS	NS	NS	NS	NS	NS	NS	NS	NS	0.0278	0.00965	0.027	NS	NS	NS	NS	NS	NS	NS	NS	NS	NS	NS	NS	NS	NS	NS	NS	NS
9646	response to absence of light (GO:0009646)	NS	NS	NS	NS	NS	NS	NS	NS	NS	NS	1.61e-06	6.46e-06	0.000121	3.45e-07	2.22e-08	NS	NS	NS	NS	NS	0.00694	NS	0.0212	NS	NS	6.43e-05	0.000138	0.0012	2.14e-06	7.17e-07
19725	cellular homeostasis (GO:0019725)	NS	NS	NS	NS	NS	NS	NS	NS	NS	NS	NS	0.000566	NS	NS	NS	NS	NS	NS	NS	NS	NS	0.0267	0.0389	NS	0.0437	NS	0.000351	NS	NS	NS
48519	negative regulation of biological process (GO:0048519)	NS	NS	NS	NS	NS	NS	NS	NS	NS	NS	4.23e-11	1.67e-08	6.3e-06	0.00407	0.000542	NS	NS	NS	NS	NS	0.0107	NS	NS	NS	NS	1.03e-05	2.72e-06	7.11e-07	NS	0.0214
71705	nitrogen compound transport (GO:0071705)	NS	NS	NS	NS	NS	NS	NS	NS	NS	NS	0.000276	0.00361	0.00149	NS	NS	NS	NS	NS	NS	NS	NS	NS	NS	NS	NS	NS	NS	NS	NS	NS
2832	negative regulation of response to biotic stimulus (GO:0002832)	NS	NS	NS	NS	NS	NS	NS	NS	NS	NS	NS	NS	8.7e-05	NS	NS	NS	NS	NS	NS	NS	NS	NS	0.01	NS	NS	NS	NS	9.17e-05	NS	NS
10193	response to ozone (GO:0010193)	NS	NS	NS	NS	NS	NS	NS	NS	NS	NS	NS	NS	0.00906	NS	NS	NS	NS	NS	NS	NS	0.0197	NS	NS	NS	NS	NS	NS	0.0264	NS	NS
31348	negative regulation of defense response (GO:0031348)	NS	NS	NS	NS	NS	NS	NS	NS	NS	NS	NS	0.0208	9.8e-06	0.041	NS	NS	NS	NS	NS	NS	0.049	NS	0.0214	NS	NS	NS	0.0372	0.000769	NS	NS
8219	cell death (GO:0008219)	NS	NS	NS	NS	NS	NS	NS	NS	NS	NS	1.79e-05	0.00194	0.000582	0.000916	0.0489	NS	NS	NS	NS	NS	0.029	NS	NS	NS	NS	0.0261	NS	NS	0.0234	NS
55082	intracellular chemical homeostasis (GO:0055082)	NS	NS	NS	NS	NS	NS	NS	NS	NS	NS	NS	0.000186	NS	NS	NS	NS	NS	NS	NS	NS	NS	NS	0.0269	NS	NS	NS	0.00741	NS	NS	NS
10030	positive regulation of seed germination (GO:0010030)	NS	NS	NS	NS	NS	NS	NS	NS	NS	NS	0.00319	NS	NS	0.0147	0.0171	NS	NS	NS	NS	NS	0.0356	NS	NS	NS	NS	0.00431	0.0489	NS	0.00432	0.0148
42537	benzene-containing compound metabolic process (GO:0042537)	NS	NS	NS	NS	NS	NS	NS	NS	NS	NS	NS	0.0334	0.0498	NS	NS	NS	NS	NS	NS	NS	0.0449	NS	NS	NS	NS	NS	0.0238	NS	0.015	0.0116
34470	ncRNA processing (GO:0034470)	NS	NS	NS	NS	NS	NS	NS	NS	NS	NS	NS	NS	0.00154	NS	NS	NS	NS	NS	NS	NS	0.0282	NS	NS	NS	NS	NS	NS	NS	NS	0.000352
10017	red or far-red light signaling pathway (GO:0010017)	NS	NS	NS	NS	NS	0.00527	0.00472	0.00367	0.0123	0.000624	0.0474	NS	0.0199	NS	NS	NS	0.0247	NS	0.0182	NS	0.0297	NS	NS	NS	0.0168	0.000449	0.00158	0.00144	0.000265	0.0071
48584	positive regulation of response to stimulus (GO:0048584)	NS	NS	NS	NS	NS	NS	NS	NS	NS	NS	1.12e-08	1.71e-12	1.25e-14	0.00242	NS	NS	NS	NS	NS	NS	0.0113	0.041	0.0243	NS	NS	6.77e-06	2.84e-06	7.48e-06	NS	NS
9695	jasmonic acid biosynthetic process (GO:0009695)	NS	NS	NS	NS	NS	NS	NS	NS	NS	NS	NS	NS	0.0311	NS	NS	NS	NS	NS	NS	NS	NS	0.0393	NS	NS	NS	NS	NS	0.0127	NS	NS
8104	protein localization (GO:0008104)	NS	NS	0.0473	NS	NS	NS	NS	NS	NS	NS	7.9e-05	NS	0.0362	NS	NS	NS	NS	NS	0.0257	NS	0.012	NS	0.000236	NS	0.00595	NS	NS	NS	NS	NS
51641	cellular localization (GO:0051641)	NS	NS	NS	NS	NS	NS	NS	NS	NS	NS	2.98e-07	NS	0.00083	NS	NS	NS	NS	NS	NS	NS	0.0417	NS	0.00501	NS	0.00991	0.00812	NS	NS	NS	NS
16072	rRNA metabolic process (GO:0016072)	NS	NS	NS	NS	NS	NS	NS	NS	NS	NS	NS	NS	4.31e-05	0.028	NS	NS	NS	NS	NS	NS	NS	NS	0.026	NS	NS	NS	NS	NS	0.0369	0.0367
32102	negative regulation of response to external stimulus (GO:0032102)	NS	NS	NS	NS	NS	NS	NS	NS	NS	NS	NS	NS	8.65e-05	NS	NS	NS	NS	NS	NS	NS	NS	NS	0.00997	NS	NS	NS	NS	9.13e-05	NS	NS
70727	cellular macromolecule localization (GO:0070727)	NS	NS	NS	NS	NS	NS	NS	NS	NS	NS	1.76e-05	NS	0.00845	NS	NS	NS	NS	NS	NS	NS	0.0491	NS	0.00233	NS	0.0195	0.0286	NS	NS	NS	NS
90407	organophosphate biosynthetic process (GO:0090407)	NS	NS	NS	NS	NS	NS	NS	NS	NS	NS	NS	NS	NS	NS	NS	0.00112	0.0148	0.00199	NS	NS	NS	NS	NS	NS	NS	NS	NS	0.00288	NS	NS
9744	response to sucrose (GO:0009744)	NS	NS	NS	NS	NS	NS	NS	NS	NS	NS	NS	NS	NS	NS	NS	NS	NS	0.00988	NS	NS	0.0041	NS	NS	NS	NS	0.0268	0.0044	0.000489	0.00451	0.0259
1901659	glycosyl compound biosynthetic process (GO:1901659)	NS	NS	NS	NS	NS	NS	NS	NS	NS	NS	NS	NS	NS	NS	NS	9.94e-06	0.000127	0.0111	1.19e-08	NS	NS	0.0218	NS	NS	NS	0.000121	0.000152	0.0466	1.2e-06	NS
19758	glycosinolate biosynthetic process (GO:0019758)	NS	NS	NS	NS	NS	NS	NS	NS	NS	NS	NS	NS	NS	NS	NS	3.25e-06	1.45e-05	0.00796	9.27e-09	NS	NS	0.0456	NS	NS	NS	5.91e-05	2.63e-05	0.042	1.89e-06	NS
43335	protein unfolding (GO:0043335)	NS	NS	NS	NS	NS	NS	NS	NS	NS	NS	NS	NS	NS	NS	NS	0.0215	0.0157	0.0167	NS	NS	NS	NS	NS	NS	NS	NS	NS	NS	NS	NS
170039	proteinogenic amino acid metabolic process (GO:0170039)	NS	NS	NS	NS	NS	NS	NS	NS	NS	NS	NS	NS	NS	NS	NS	7.37e-08	0.000789	6.68e-05	1.66e-06	NS	0.0424	NS	NS	NS	NS	5.42e-05	0.00102	1.65e-05	6.94e-06	NS
19761	glucosinolate biosynthetic process (GO:0019761)	NS	NS	NS	NS	NS	NS	NS	NS	NS	NS	NS	NS	NS	NS	NS	3.28e-06	1.46e-05	0.00798	9.51e-09	NS	NS	0.0458	NS	NS	NS	5.95e-05	2.64e-05	0.042	1.91e-06	NS
9793	embryo development ending in seed dormancy (GO:0009793)	NS	NS	NS	NS	NS	NS	NS	NS	NS	NS	NS	NS	NS	NS	NS	NS	0.0444	1.81e-05	NS	NS	NS	NS	0.0243	NS	NS	NS	0.0362	0.0163	NS	NS
6520	amino acid metabolic process (GO:0006520)	NS	NS	NS	NS	NS	NS	NS	NS	NS	NS	NS	NS	NS	NS	NS	3.19e-12	8.8e-05	1.87e-06	5.88e-07	NS	NS	NS	NS	0.0139	NS	3.54e-10	1.84e-05	7.32e-08	1.23e-06	NS
2000070	regulation of response to water deprivation (GO:2000070)	NS	NS	NS	NS	NS	NS	NS	NS	NS	NS	NS	NS	NS	NS	NS	0.0119	NS	NS	0.0185	NS	NS	NS	0.0419	NS	NS	0.00245	0.0115	0.0419	0.0103	NS
9790	embryo development (GO:0009790)	NS	NS	NS	NS	NS	NS	NS	NS	NS	NS	NS	NS	NS	NS	NS	NS	0.0107	6.32e-06	NS	NS	NS	NS	0.0134	NS	NS	0.0454	0.0211	0.0151	NS	NS
16144	S-glycoside biosynthetic process (GO:0016144)	NS	NS	NS	NS	NS	NS	NS	NS	NS	NS	NS	NS	NS	NS	NS	3.3e-06	1.48e-05	0.008	9.76e-09	NS	NS	0.0461	NS	NS	NS	5.98e-05	2.66e-05	0.0421	1.93e-06	NS
278	mitotic cell cycle (GO:0000278)	NS	NS	NS	NS	NS	NS	NS	NS	NS	NS	NS	NS	NS	NS	NS	1.2e-07	1.58e-13	2.41e-24	7.07e-10	1.01e-14	NS	NS	0.0288	NS	NS	0.0097	7.89e-06	1.09e-11	0.0051	4.33e-06
10065	primary meristem tissue development (GO:0010065)	NS	NS	NS	NS	NS	NS	NS	NS	NS	NS	NS	NS	NS	NS	NS	NS	NS	0.0424	NS	NS	0.0421	NS	NS	NS	NS	NS	NS	0.0341	NS	NS
7018	microtubule-based movement (GO:0007018)	NS	NS	NS	NS	NS	0.0108	NS	NS	NS	NS	NS	NS	0.0327	NS	NS	5e-11	1.07e-10	3.05e-18	3.08e-05	7.28e-12	NS	NS	NS	NS	NS	4.48e-05	9.06e-05	3.6e-09	NS	1.27e-06
19538	protein metabolic process (GO:0019538)	NS	NS	NS	NS	NS	NS	0.0144	NS	NS	0.00123	2.32e-06	2.72e-07	1.84e-09	1.12e-06	NS	2.72e-05	0.0177	6.73e-09	NS	NS	NS	0.00943	0.0381	0.0263	0.000678	2.6e-13	4.61e-10	2.63e-21	3.28e-05	NS
9124	nucleoside monophosphate biosynthetic process (GO:0009124)	NS	NS	NS	NS	NS	NS	NS	NS	NS	NS	NS	NS	NS	NS	NS	0.00749	0.0212	0.00155	NS	NS	NS	NS	NS	NS	NS	NS	NS	NS	NS	NS
51649	establishment of localization in cell (GO:0051649)	NS	NS	NS	NS	NS	NS	NS	NS	NS	NS	1.11e-06	NS	0.000933	NS	NS	NS	NS	0.015	0.0229	NS	0.00361	0.00451	0.00168	NS	NS	NS	NS	NS	NS	NS
1900055	regulation of leaf senescence (GO:1900055)	NS	0.0285	NS	NS	NS	NS	NS	NS	NS	NS	0.00729	0.00773	0.0203	NS	0.0253	NS	NS	NS	NS	NS	NS	NS	NS	NS	NS	0.0438	0.0467	NS	NS	0.0443
2833	positive regulation of response to biotic stimulus (GO:0002833)	NS	0.0342	NS	NS	NS	NS	NS	NS	NS	NS	0.000422	5.59e-05	1.55e-07	0.0234	NS	NS	NS	NS	NS	NS	NS	NS	NS	NS	NS	0.00146	0.01	0.0046	NS	NS
32107	regulation of response to nutrient levels (GO:0032107)	NS	NS	0.0404	NS	NS	NS	NS	NS	NS	NS	NS	NS	0.00944	NS	NS	NS	NS	NS	NS	NS	NS	NS	NS	NS	NS	NS	NS	0.00427	NS	NS
71215	cellular response to abscisic acid stimulus (GO:0071215)	NS	NS	0.0497	NS	NS	NS	NS	NS	NS	NS	0.00503	6.11e-05	3.37e-05	0.00056	0.00249	NS	NS	NS	NS	NS	NS	NS	NS	NS	NS	0.0135	0.00304	0.0197	0.015	0.0261
32103	positive regulation of response to external stimulus (GO:0032103)	NS	0.00251	NS	NS	NS	NS	NS	NS	NS	NS	0.000303	3.78e-05	8.45e-09	0.0432	NS	NS	NS	NS	NS	NS	NS	NS	NS	NS	NS	0.00186	0.0085	0.00122	NS	NS
97306	cellular response to alcohol (GO:0097306)	NS	NS	0.0493	NS	NS	NS	NS	NS	NS	NS	0.00501	6.06e-05	3.35e-05	0.000554	0.00247	NS	NS	NS	NS	NS	NS	NS	NS	NS	NS	0.0135	0.00303	0.0196	0.0149	0.026
52542	defense response by callose deposition (GO:0052542)	NS	0.0441	NS	NS	NS	NS	NS	NS	NS	NS	NS	0.036	0.00104	NS	NS	NS	NS	NS	NS	NS	NS	NS	NS	NS	NS	NS	NS	0.0179	0.0221	NS
32104	regulation of response to extracellular stimulus (GO:0032104)	NS	NS	0.04	NS	NS	NS	NS	NS	NS	NS	NS	NS	0.00941	NS	NS	NS	NS	NS	NS	NS	NS	NS	NS	NS	NS	NS	NS	0.00426	NS	NS
45088	regulation of innate immune response (GO:0045088)	NS	0.0295	NS	NS	NS	NS	NS	NS	NS	NS	0.000667	3.32e-05	1.88e-08	0.00313	NS	NS	NS	NS	NS	NS	NS	NS	NS	NS	NS	0.000765	0.00238	9.13e-05	0.0261	NS
31349	positive regulation of defense response (GO:0031349)	NS	0.0165	NS	NS	NS	NS	NS	NS	NS	NS	4.46e-05	1.5e-06	3.95e-09	0.00477	NS	NS	NS	NS	NS	NS	NS	NS	NS	NS	NS	0.00086	0.00238	0.00128	NS	NS
46487	glyoxylate metabolic process (GO:0046487)	0.0456	NS	0.0172	NS	NS	NS	NS	NS	NS	NS	NS	NS	NS	NS	NS	NS	NS	NS	NS	NS	NS	NS	0.0311	NS	NS	NS	NS	NS	NS	NS
8150	biological_process (GO:0008150)	0.0363	NS	0.0205	NS	NS	NS	NS	NS	NS	NS	0.00143	0.000371	7.77e-06	0.00985	6.79e-05	0.0118	0.00855	NS	NS	NS	0.0466	NS	0.0453	NS	NS	1.02e-06	2.01e-07	3.23e-06	NS	0.0139
6189	'de novo' IMP biosynthetic process (GO:0006189)	NS	NS	NS	NS	NS	NS	NS	NS	NS	NS	NS	NS	NS	NS	NS	0.0367	0.0213	0.0271	NS	NS	NS	NS	NS	NS	NS	NS	NS	NS	NS	NS
16043	cellular component organization (GO:0016043)	NS	NS	0.0474	NS	NS	NS	NS	NS	NS	NS	NS	NS	NS	NS	NS	6.32e-13	1.25e-12	6.71e-22	0.01	4.31e-07	NS	NS	NS	NS	NS	4.33e-13	3.21e-11	3.22e-14	0.0377	0.023
9733	response to auxin (GO:0009733)	NS	NS	NS	NS	NS	NS	NS	0.019	NS	NS	9.06e-06	0.00185	0.00136	0.015	9.93e-05	NS	NS	NS	NS	NS	NS	NS	NS	NS	NS	0.00347	0.0258	0.0105	0.0282	0.000658
6810	transport (GO:0006810)	NS	NS	NS	NS	NS	NS	NS	NS	NS	0.0295	6.11e-10	1.16e-06	2.41e-07	0.0196	NS	NS	NS	NS	NS	NS	NS	NS	NS	NS	NS	0.000216	0.00662	0.00593	NS	NS
45454	cell redox homeostasis (GO:0045454)	NS	NS	NS	NS	NS	0.0113	NS	NS	NS	NS	NS	NS	NS	NS	NS	0.00235	0.00827	0.00508	NS	NS	0.0105	NS	NS	NS	NS	NS	0.0167	0.00721	NS	NS
9615	response to virus (GO:0009615)	NS	NS	NS	NS	NS	0.0438	NS	NS	NS	NS	NS	NS	NS	NS	NS	NS	NS	NS	NS	NS	0.0372	NS	0.0138	NS	NS	NS	NS	0.000793	NS	NS
55086	nucleobase-containing small molecule metabolic process (GO:0055086)	NS	NS	NS	NS	NS	NS	NS	NS	NS	0.000207	NS	NS	NS	NS	NS	1.02e-05	0.000303	3.03e-06	0.000629	NS	NS	NS	NS	NS	NS	0.00455	0.0488	2.69e-06	0.0147	NS
19439	aromatic compound catabolic process (GO:0019439)	NS	NS	NS	NS	NS	NS	NS	0.0118	NS	0.00188	NS	NS	NS	NS	NS	NS	NS	NS	0.0242	NS	NS	NS	NS	NS	NS	NS	NS	NS	0.0137	NS
51252	regulation of RNA metabolic process (GO:0051252)	NS	NS	NS	NS	NS	0.000482	NS	NS	NS	NS	0.000111	0.0163	NS	0.00415	0.000511	NS	NS	NS	NS	NS	0.000443	NS	NS	NS	NS	NS	NS	NS	NS	NS
46467	membrane lipid biosynthetic process (GO:0046467)	NS	NS	NS	NS	NS	NS	NS	NS	NS	NS	0.0403	NS	0.00195	NS	NS	NS	NS	NS	NS	NS	NS	NS	NS	NS	NS	NS	NS	0.0404	0.0471	NS
2221	pattern recognition receptor signaling pathway (GO:0002221)	NS	NS	NS	NS	NS	NS	NS	NS	NS	NS	0.0235	NS	0.000293	NS	NS	NS	NS	NS	NS	NS	NS	NS	NS	NS	NS	NS	NS	0.0343	NS	NS
9141	nucleoside triphosphate metabolic process (GO:0009141)	NS	NS	NS	NS	NS	NS	NS	0.0134	NS	0.000934	NS	NS	NS	NS	NS	0.000108	2e-05	0.000928	0.000193	NS	NS	NS	NS	NS	NS	0.0299	0.00501	NS	0.027	NS
42181	ketone biosynthetic process (GO:0042181)	NS	NS	NS	NS	NS	NS	NS	0.016	NS	NS	NS	NS	NS	NS	NS	1.12e-05	6.22e-05	3.7e-05	0.00183	0.0181	NS	NS	NS	NS	NS	0.00922	0.00208	0.0248	NS	NS
1901463	regulation of tetrapyrrole biosynthetic process (GO:1901463)	NS	NS	NS	NS	NS	NS	0.0293	NS	NS	NS	NS	NS	NS	NS	NS	0.000657	5.04e-06	1.53e-05	0.0341	0.00364	NS	NS	NS	NS	NS	0.00034	1.11e-05	0.000276	NS	0.00156
9259	ribonucleotide metabolic process (GO:0009259)	NS	NS	NS	NS	NS	NS	NS	NS	NS	0.000621	NS	NS	NS	NS	NS	0.000837	0.000116	6.53e-05	0.000235	NS	NS	NS	NS	NS	NS	NS	NS	0.00428	NS	NS
71806	protein transmembrane transport (GO:0071806)	NS	NS	NS	NS	NS	NS	NS	NS	NS	NS	NS	NS	NS	NS	NS	0.00296	0.0218	0.0105	NS	NS	NS	NS	NS	NS	NS	0.0103	NS	NS	NS	NS
9750	response to fructose (GO:0009750)	NS	NS	NS	NS	NS	NS	NS	NS	NS	NS	0.0202	NS	0.0199	NS	NS	NS	NS	NS	NS	NS	NS	NS	NS	NS	NS	0.0036	0.0265	0.0459	NS	NS
19219	regulation of nucleobase-containing compound metabolic process (GO:0019219)	NS	NS	NS	NS	NS	0.00528	NS	NS	NS	NS	5.12e-05	0.00843	NS	0.00623	0.000903	NS	NS	NS	NS	NS	0.00482	NS	NS	NS	NS	NS	NS	NS	NS	NS
70417	cellular response to cold (GO:0070417)	NS	NS	NS	NS	NS	0.016	NS	NS	NS	NS	NS	NS	0.0143	0.0228	NS	NS	NS	NS	NS	NS	0.0292	NS	NS	NS	NS	NS	NS	NS	NS	NS
42180	cellular ketone metabolic process (GO:0042180)	NS	NS	NS	NS	NS	NS	NS	0.0185	NS	NS	NS	NS	NS	NS	NS	0.000134	9.9e-05	0.000302	0.00583	NS	NS	NS	NS	NS	NS	0.00634	1.86e-05	0.00376	0.0105	NS
30388	fructose 1,6-bisphosphate metabolic process (GO:0030388)	NS	NS	NS	NS	NS	NS	NS	0.00827	NS	NS	NS	NS	NS	NS	NS	0.00247	0.00126	0.0124	0.000331	0.0276	NS	NS	NS	NS	NS	NS	0.0386	NS	0.0168	NS
19693	ribose phosphate metabolic process (GO:0019693)	NS	NS	NS	NS	NS	NS	NS	NS	NS	0.00102	NS	NS	NS	NS	NS	0.000277	0.000146	5.06e-05	0.000124	NS	NS	NS	NS	NS	NS	NS	NS	0.00175	NS	NS
42744	hydrogen peroxide catabolic process (GO:0042744)	NS	NS	NS	NS	NS	0.0315	NS	NS	NS	NS	NS	NS	NS	NS	NS	0.000426	0.00995	0.00483	NS	NS	0.0126	NS	NS	NS	NS	0.00527	0.0155	0.0373	NS	NS
2239	response to oomycetes (GO:0002239)	NS	NS	NS	NS	NS	NS	NS	NS	NS	NS	0.0467	NS	0.00195	NS	NS	NS	NS	NS	NS	NS	NS	NS	NS	NS	NS	0.0158	0.0284	0.00661	NS	NS
1901361	organic cyclic compound catabolic process (GO:1901361)	NS	NS	NS	NS	NS	NS	NS	0.00743	NS	0.00249	NS	NS	NS	NS	NS	NS	NS	NS	0.0191	NS	NS	NS	NS	NS	NS	0.0445	NS	NS	0.00637	NS
7005	mitochondrion organization (GO:0007005)	NS	NS	NS	NS	NS	0.0165	NS	NS	NS	NS	NS	NS	NS	NS	NS	NS	NS	0.0216	NS	NS	0.00611	NS	NS	NS	NS	NS	NS	NS	NS	NS
42372	phylloquinone biosynthetic process (GO:0042372)	NS	NS	NS	NS	NS	NS	NS	NS	NS	NS	NS	NS	NS	NS	NS	0.0368	0.0232	0.0276	NS	NS	NS	NS	NS	NS	NS	NS	NS	NS	NS	NS
48193	Golgi vesicle transport (GO:0048193)	NS	NS	NS	NS	NS	0.0301	NS	NS	NS	NS	NS	NS	NS	NS	NS	0.0329	NS	0.0338	0.0314	NS	0.00134	NS	0.00169	NS	NS	NS	NS	NS	NS	NS
9808	lignin metabolic process (GO:0009808)	NS	NS	NS	NS	NS	0.0208	NS	NS	NS	NS	NS	NS	NS	NS	NS	NS	NS	NS	0.0058	NS	0.034	NS	NS	NS	NS	NS	NS	NS	NS	NS
51603	proteolysis involved in protein catabolic process (GO:0051603)	NS	NS	NS	NS	NS	0.0403	NS	NS	NS	NS	0.000257	1.53e-05	0.000266	0.00164	NS	0.000504	0.0164	0.000582	NS	NS	NS	NS	NS	NS	NS	NS	NS	NS	NS	NS
42374	phylloquinone metabolic process (GO:0042374)	NS	NS	NS	NS	NS	NS	NS	NS	NS	NS	NS	NS	NS	NS	NS	0.0368	0.0232	0.0277	NS	NS	NS	NS	NS	NS	NS	NS	NS	NS	NS	NS
48574	long-day photoperiodism, flowering (GO:0048574)	NS	NS	NS	NS	NS	NS	NS	0.0365	NS	NS	NS	NS	NS	NS	NS	NS	NS	NS	0.0314	NS	NS	NS	NS	NS	NS	NS	NS	0.00959	0.0429	NS
9156	ribonucleoside monophosphate biosynthetic process (GO:0009156)	NS	NS	NS	NS	NS	NS	NS	NS	NS	NS	NS	NS	NS	NS	NS	0.0235	0.0252	0.0159	NS	NS	NS	NS	NS	NS	NS	NS	NS	NS	NS	NS
9893	positive regulation of metabolic process (GO:0009893)	NS	NS	NS	NS	NS	0.00974	NS	NS	NS	NS	0.00407	0.0029	0.0189	0.0336	NS	NS	NS	NS	NS	NS	NS	NS	NS	NS	NS	NS	0.0114	0.0099	0.0297	NS
10380	regulation of chlorophyll biosynthetic process (GO:0010380)	NS	NS	NS	NS	NS	NS	0.0225	NS	NS	NS	NS	NS	NS	NS	NS	0.00628	9.44e-05	0.000196	NS	0.00225	NS	NS	NS	NS	NS	0.00188	9.45e-05	0.00166	NS	0.000808
9123	nucleoside monophosphate metabolic process (GO:0009123)	NS	NS	NS	NS	NS	NS	NS	NS	NS	NS	NS	NS	NS	NS	NS	0.00303	0.0252	0.00196	NS	NS	NS	NS	NS	NS	NS	NS	NS	NS	NS	NS
90056	regulation of chlorophyll metabolic process (GO:0090056)	NS	NS	NS	NS	NS	NS	0.0408	NS	NS	NS	NS	NS	NS	NS	NS	0.0304	0.000872	0.0017	NS	0.00736	NS	NS	NS	NS	NS	0.000179	0.000135	0.000602	NS	0.001
51604	protein maturation (GO:0051604)	NS	NS	NS	NS	NS	0.000254	NS	NS	NS	NS	NS	NS	NS	NS	NS	7.23e-13	1.26e-11	1.67e-11	0.000192	NS	NS	NS	NS	NS	NS	1.16e-06	2.89e-05	0.000187	NS	NS
42362	fat-soluble vitamin biosynthetic process (GO:0042362)	NS	NS	NS	NS	NS	0.0158	NS	NS	NS	NS	NS	NS	NS	NS	NS	0.000608	0.000226	0.0023	0.0386	NS	NS	NS	NS	NS	NS	0.00484	0.000303	0.0155	NS	NS
6633	fatty acid biosynthetic process (GO:0006633)	NS	NS	NS	NS	NS	0.00469	NS	NS	NS	NS	NS	NS	NS	NS	NS	1.68e-07	6.16e-05	3.88e-11	0.000425	NS	NS	NS	NS	NS	NS	0.00283	0.03	9.95e-08	NS	NS
209	protein polyubiquitination (GO:0000209)	NS	NS	NS	NS	NS	NS	NS	NS	NS	NS	NS	NS	NS	NS	NS	0.00673	0.0267	0.00808	NS	NS	NS	NS	NS	NS	NS	NS	NS	NS	NS	NS
33036	macromolecule localization (GO:0033036)	NS	NS	NS	NS	NS	NS	NS	NS	NS	NS	9.07e-06	NS	0.000226	NS	NS	NS	NS	0.0442	NS	NS	NS	NS	NS	NS	NS	NS	NS	NS	NS	NS
9789	positive regulation of abscisic acid-activated signaling pathway (GO:0009789)	NS	NS	NS	NS	NS	NS	NS	NS	NS	NS	0.0473	NS	0.0198	NS	NS	NS	NS	NS	NS	NS	NS	NS	NS	NS	NS	NS	NS	NS	NS	NS
1901703	protein localization involved in auxin polar transport (GO:1901703)	NS	NS	NS	NS	NS	NS	NS	NS	NS	NS	0.0457	NS	0.0474	NS	NS	NS	NS	NS	NS	NS	NS	NS	NS	NS	NS	NS	NS	NS	NS	NS
7051	spindle organization (GO:0007051)	NS	NS	NS	NS	NS	NS	NS	NS	NS	NS	NS	0.0382	NS	NS	NS	0.0364	0.00142	4.45e-05	0.0232	8.57e-05	NS	NS	NS	NS	NS	NS	NS	NS	NS	0.0419
6518	peptide metabolic process (GO:0006518)	NS	NS	NS	NS	NS	NS	NS	NS	NS	NS	5.71e-07	0.000689	3.09e-05	0.00284	0.00724	3.1e-39	8.15e-20	4.98e-44	0.00585	NS	NS	NS	NS	NS	NS	6.79e-13	8.14e-06	7.57e-17	NS	NS
50793	regulation of developmental process (GO:0050793)	NS	NS	NS	NS	NS	NS	NS	NS	NS	NS	1.42e-07	6.85e-05	0.00625	0.000785	0.000369	NS	NS	0.024	NS	NS	NS	NS	NS	NS	NS	0.00146	2.66e-05	1.51e-05	0.015	0.0346
1901605	alpha-amino acid metabolic process (GO:1901605)	NS	NS	NS	NS	NS	NS	NS	NS	NS	NS	NS	NS	0.0124	NS	NS	2.23e-07	0.00211	0.000537	1.93e-07	NS	NS	NS	NS	NS	NS	1.07e-06	4.08e-05	2.57e-07	1.09e-07	NS
48878	chemical homeostasis (GO:0048878)	NS	NS	NS	NS	NS	NS	NS	NS	NS	NS	0.00345	0.000125	NS	NS	NS	NS	NS	NS	NS	NS	NS	NS	0.00328	NS	NS	0.0279	0.0042	NS	NS	NS
43603	amide metabolic process (GO:0043603)	NS	NS	NS	NS	NS	NS	NS	NS	NS	NS	7.42e-05	0.0154	0.0231	0.0302	NS	2.43e-35	1.31e-18	1.44e-42	0.000635	NS	NS	NS	NS	NS	NS	2.68e-12	3.7e-06	1.61e-19	NS	NS
42592	homeostatic process (GO:0042592)	NS	NS	NS	NS	NS	NS	NS	NS	NS	NS	0.0197	0.000388	NS	NS	NS	NS	NS	NS	NS	NS	0.0125	NS	0.00647	NS	NS	0.00299	0.000152	NS	NS	NS
9991	response to extracellular stimulus (GO:0009991)	1.83e-08	9.97e-09	1.32e-09	0.0271	1.49e-09	NS	NS	0.0496	0.0174	0.00166	2.51e-06	1.11e-08	2.33e-11	2.54e-07	7.96e-09	0.0215	0.0282	0.0161	NS	NS	1.66e-07	3.76e-08	4.71e-11	1.34e-05	3.84e-13	1.7e-09	2.29e-11	3.09e-14	8.32e-08	3.18e-10
98771	inorganic ion homeostasis (GO:0098771)	NS	NS	NS	NS	NS	NS	NS	NS	NS	NS	0.0171	0.00298	NS	NS	NS	NS	NS	NS	NS	NS	NS	0.0413	0.00183	NS	NS	NS	0.0155	NS	NS	NS
90696	post-embryonic plant organ development (GO:0090696)	NS	NS	NS	NS	NS	NS	NS	NS	NS	NS	0.0162	0.0208	NS	NS	NS	NS	NS	NS	NS	NS	NS	NS	0.0264	NS	NS	NS	NS	0.0451	NS	NS
31328	positive regulation of cellular biosynthetic process (GO:0031328)	NS	NS	NS	NS	NS	0.00225	NS	NS	NS	NS	0.0232	0.0407	NS	NS	NS	NS	NS	NS	NS	NS	0.019	NS	NS	NS	NS	NS	NS	NS	NS	NS
9161	ribonucleoside monophosphate metabolic process (GO:0009161)	NS	NS	NS	NS	NS	NS	NS	NS	NS	NS	NS	NS	NS	NS	NS	0.00962	0.0302	0.0187	NS	NS	NS	NS	NS	NS	NS	NS	NS	NS	NS	NS
44238	primary metabolic process (GO:0044238)	NS	NS	NS	NS	NS	NS	NS	NS	NS	NS	1.35e-07	3.79e-05	7.25e-07	0.000195	NS	3.49e-18	9.86e-11	6.87e-28	0.000107	NS	NS	NS	NS	NS	NS	7.05e-29	1.76e-17	4.37e-36	1.12e-09	NS
70647	protein modification by small protein conjugation or removal (GO:0070647)	NS	NS	NS	NS	NS	NS	NS	NS	NS	NS	5.28e-13	5.75e-13	2.48e-12	4.01e-09	0.000898	1.47e-07	1.59e-09	2.19e-08	NS	0.045	NS	NS	NS	NS	NS	NS	NS	NS	0.00638	NS
80154	regulation of fertilization (GO:0080154)	NS	NS	NS	NS	NS	NS	NS	NS	NS	NS	NS	NS	NS	NS	NS	0.0145	0.0327	0.0122	NS	NS	0.0379	NS	NS	NS	NS	0.000967	0.0236	0.000113	NS	NS
1901566	organonitrogen compound biosynthetic process (GO:1901566)	NS	NS	NS	NS	NS	NS	NS	NS	NS	NS	0.00862	0.0252	NS	NS	NS	3.21e-52	2.47e-26	3.83e-47	1.51e-12	NS	NS	NS	NS	NS	NS	2.55e-23	8.74e-10	2.37e-26	0.000146	NS
10109	regulation of photosynthesis (GO:0010109)	NS	NS	NS	NS	NS	0.00279	NS	NS	NS	NS	NS	NS	NS	NS	NS	7.21e-09	4.54e-10	3.82e-09	0.000125	NS	NS	NS	NS	NS	NS	1.15e-06	3.66e-07	8.4e-07	0.00407	NS
48508	embryonic meristem development (GO:0048508)	NS	NS	NS	NS	NS	NS	NS	NS	NS	NS	0.0109	0.0177	NS	NS	NS	NS	NS	0.00296	NS	NS	NS	NS	NS	NS	NS	NS	0.00486	9.93e-05	NS	NS
226	microtubule cytoskeleton organization (GO:0000226)	NS	NS	NS	NS	NS	NS	NS	NS	NS	NS	NS	NS	0.0217	NS	NS	0.000128	5.21e-07	2.31e-10	0.0219	6.29e-07	NS	NS	NS	NS	NS	NS	0.0352	0.00282	NS	0.0183
7017	microtubule-based process (GO:0007017)	NS	NS	NS	NS	NS	NS	NS	NS	NS	NS	NS	0.00557	0.000593	0.0172	NS	9.35e-09	2.82e-11	3.19e-16	0.000483	2.08e-11	NS	NS	NS	NS	NS	0.00445	0.00262	5.95e-05	NS	0.000306
1901564	organonitrogen compound metabolic process (GO:1901564)	NS	NS	NS	NS	NS	NS	NS	NS	NS	NS	1.03e-05	8.78e-09	9.02e-16	1.15e-08	NS	4.82e-23	3.39e-10	6.13e-21	5.28e-08	NS	NS	NS	NS	NS	NS	2.23e-30	1.58e-21	1.63e-42	4.57e-18	NS
9625	response to insect (GO:0009625)	NS	0.0409	NS	NS	NS	NS	NS	NS	NS	NS	NS	NS	NS	NS	NS	NS	NS	NS	NS	NS	NS	NS	NS	NS	0.0379	NS	NS	NS	NS	NS
55062	phosphate ion homeostasis (GO:0055062)	NS	0.0198	0.0165	NS	NS	NS	NS	NS	NS	NS	NS	NS	NS	NS	NS	NS	NS	NS	NS	NS	NS	NS	0.0145	NS	0.0177	NS	NS	NS	NS	NS
16998	cell wall macromolecule catabolic process (GO:0016998)	NS	0.0147	NS	NS	NS	NS	NS	NS	NS	NS	NS	NS	NS	NS	NS	NS	NS	NS	NS	NS	NS	0.00231	0.00996	0.0263	NS	NS	NS	NS	NS	NS
2000762	regulation of phenylpropanoid metabolic process (GO:2000762)	0.0472	NS	0.0466	NS	NS	NS	NS	NS	NS	NS	NS	NS	NS	NS	NS	NS	NS	NS	NS	NS	NS	NS	NS	NS	NS	NS	NS	NS	NS	NS
46506	sulfolipid biosynthetic process (GO:0046506)	0.00699	0.000538	0.00272	NS	0.033	NS	NS	NS	NS	NS	NS	NS	NS	NS	NS	NS	NS	NS	NS	NS	0.0191	0.00156	0.00552	NS	0.0362	NS	NS	NS	NS	NS
46505	sulfolipid metabolic process (GO:0046505)	0.00687	0.000529	0.00266	NS	0.0322	NS	NS	NS	NS	NS	NS	NS	NS	NS	NS	NS	NS	NS	NS	NS	0.0191	0.00155	0.00549	NS	0.0359	NS	NS	NS	NS	NS
30643	intracellular phosphate ion homeostasis (GO:0030643)	NS	0.00358	NS	NS	NS	NS	NS	NS	NS	NS	NS	NS	NS	NS	NS	NS	NS	NS	NS	NS	NS	0.00958	NS	NS	NS	NS	NS	NS	NS	NS
10043	response to zinc ion (GO:0010043)	NS	NS	0.0293	NS	NS	NS	NS	NS	NS	NS	NS	NS	NS	NS	NS	NS	NS	NS	NS	NS	0.0409	NS	0.00872	NS	NS	NS	NS	NS	NS	NS
6097	glyoxylate cycle (GO:0006097)	NS	NS	NS	NS	0.0315	NS	NS	NS	NS	NS	NS	NS	NS	NS	NS	NS	NS	NS	NS	NS	NS	NS	NS	NS	0.0357	NS	NS	NS	NS	NS
6863	purine nucleobase transport (GO:0006863)	NS	NS	0.0314	NS	NS	NS	NS	NS	NS	NS	NS	NS	NS	NS	NS	NS	NS	NS	NS	NS	NS	NS	0.0325	NS	NS	NS	NS	NS	NS	NS
6986	response to unfolded protein (GO:0006986)	NS	NS	NS	NS	NS	NS	NS	NS	0.00179	NS	NS	NS	NS	NS	NS	NS	NS	NS	NS	NS	NS	NS	NS	0.0261	NS	NS	NS	NS	NS	NS
18974	2,4,6-trinitrotoluene metabolic process (GO:0018974)	NS	NS	NS	NS	NS	NS	NS	NS	NS	0.00408	NS	NS	NS	NS	NS	NS	NS	NS	NS	NS	NS	NS	NS	NS	0.0149	NS	NS	NS	NS	NS
16109	tetraterpenoid biosynthetic process (GO:0016109)	NS	NS	NS	NS	NS	0.0311	NS	NS	NS	NS	NS	NS	NS	NS	NS	0.000424	0.00426	4.68e-05	0.0133	NS	NS	NS	NS	NS	NS	0.0206	NS	0.00519	NS	NS
10189	vitamin E biosynthetic process (GO:0010189)	NS	NS	NS	NS	NS	0.0324	NS	NS	NS	NS	NS	NS	NS	NS	NS	0.0363	0.0231	NS	0.018	NS	NS	NS	NS	NS	NS	0.0214	0.0114	NS	0.00574	NS
10345	suberin biosynthetic process (GO:0010345)	NS	NS	NS	NS	NS	0.00474	NS	NS	NS	0.000129	NS	NS	NS	NS	NS	NS	NS	NS	NS	NS	NS	NS	NS	NS	0.00261	NS	NS	NS	NS	NS
71669	plant-type cell wall organization or biogenesis (GO:0071669)	NS	NS	NS	NS	NS	NS	0.00154	NS	NS	NS	NS	NS	NS	NS	NS	NS	NS	NS	NS	NS	NS	0.00683	NS	NS	NS	NS	NS	NS	NS	NS
6749	glutathione metabolic process (GO:0006749)	NS	NS	NS	NS	NS	0.0123	0.0476	0.00736	0.0189	0.000108	NS	NS	NS	NS	NS	NS	NS	NS	NS	NS	0.000116	0.00295	0.00998	NS	0.000881	NS	NS	NS	NS	NS
10099	regulation of photomorphogenesis (GO:0010099)	NS	NS	NS	NS	NS	0.0006	0.00119	0.00445	0.00454	NS	NS	NS	NS	NS	NS	NS	NS	NS	NS	NS	0.0303	0.0387	NS	NS	NS	NS	NS	NS	NS	NS
19326	nitrotoluene metabolic process (GO:0019326)	NS	NS	NS	NS	NS	NS	NS	NS	NS	0.00401	NS	NS	NS	NS	NS	NS	NS	NS	NS	NS	NS	NS	NS	NS	0.0146	NS	NS	NS	NS	NS
35337	fatty-acyl-CoA metabolic process (GO:0035337)	NS	NS	NS	NS	NS	NS	NS	NS	NS	0.0032	NS	NS	NS	NS	NS	NS	NS	NS	NS	NS	NS	NS	NS	NS	0.0194	NS	NS	NS	NS	NS
5982	starch metabolic process (GO:0005982)	NS	NS	NS	NS	NS	0.044	NS	NS	NS	NS	NS	NS	NS	NS	NS	2.39e-10	8.92e-08	6.62e-07	2.14e-06	0.00103	NS	NS	NS	NS	NS	9.39e-06	0.000301	0.0024	0.00532	0.0238
42360	vitamin E metabolic process (GO:0042360)	NS	NS	NS	NS	NS	0.0325	NS	NS	NS	NS	NS	NS	NS	NS	NS	0.0367	0.0231	NS	0.0181	NS	NS	NS	NS	NS	NS	0.0214	0.0115	NS	0.00579	NS
160062	cutin-based cuticle development (GO:0160062)	NS	NS	NS	NS	NS	0.0158	NS	NS	NS	NS	NS	NS	NS	NS	NS	3.33e-06	1.49e-05	5.43e-08	0.000919	NS	NS	NS	NS	NS	NS	6.02e-05	0.000102	1.03e-05	0.00336	NS
46260	trinitrotoluene catabolic process (GO:0046260)	NS	NS	NS	NS	NS	NS	NS	NS	NS	0.00423	NS	NS	NS	NS	NS	NS	NS	NS	NS	NS	NS	NS	NS	NS	0.0154	NS	NS	NS	NS	NS
6694	steroid biosynthetic process (GO:0006694)	NS	NS	NS	NS	NS	NS	NS	0.00596	NS	NS	NS	NS	NS	NS	NS	NS	NS	NS	NS	NS	0.0217	NS	0.00758	NS	NS	NS	NS	NS	NS	NS
9407	toxin catabolic process (GO:0009407)	NS	NS	NS	NS	NS	NS	NS	NS	NS	0.000303	NS	NS	NS	NS	NS	NS	NS	NS	NS	NS	0.000816	0.0136	NS	NS	0.00134	NS	NS	NS	NS	NS
98754	detoxification (GO:0098754)	NS	NS	NS	NS	NS	0.00215	0.0153	0.00591	0.00343	1.77e-07	NS	NS	NS	NS	NS	NS	NS	NS	NS	NS	9.34e-05	0.00463	0.0185	0.0249	4.48e-05	NS	NS	NS	NS	NS
6775	fat-soluble vitamin metabolic process (GO:0006775)	NS	NS	NS	NS	NS	0.0159	NS	NS	NS	NS	NS	NS	NS	NS	NS	0.000611	0.000227	0.0023	0.0387	NS	NS	NS	NS	NS	NS	0.00485	0.000305	0.0155	NS	NS
16117	carotenoid biosynthetic process (GO:0016117)	NS	NS	NS	NS	NS	0.0312	NS	NS	NS	NS	NS	NS	NS	NS	NS	0.000426	0.00427	4.7e-05	0.0133	NS	NS	NS	NS	NS	NS	0.0207	NS	0.0052	NS	NS
18973	trinitrotoluene metabolic process (GO:0018973)	NS	NS	NS	NS	NS	NS	NS	NS	NS	0.00405	NS	NS	NS	NS	NS	NS	NS	NS	NS	NS	NS	NS	NS	NS	0.0147	NS	NS	NS	NS	NS
1905039	carboxylic acid transmembrane transport (GO:1905039)	NS	NS	NS	NS	NS	NS	NS	0.0157	NS	NS	NS	NS	NS	NS	NS	NS	NS	NS	NS	NS	NS	NS	0.046	NS	NS	NS	NS	NS	NS	NS
34620	cellular response to unfolded protein (GO:0034620)	NS	NS	NS	NS	NS	NS	NS	NS	0.00182	NS	NS	NS	NS	NS	NS	NS	NS	NS	NS	NS	NS	NS	NS	0.0266	NS	NS	NS	NS	NS	NS
10315	auxin export across the plasma membrane (GO:0010315)	NS	NS	NS	NS	NS	0.049	NS	NS	NS	NS	NS	NS	NS	NS	NS	NS	0.0177	NS	NS	NS	NS	NS	NS	NS	NS	NS	0.0115	0.0215	NS	NS
6740	NADPH regeneration (GO:0006740)	NS	NS	NS	NS	NS	0.00376	NS	2.84e-06	NS	0.00101	NS	NS	NS	NS	NS	NS	NS	NS	NS	NS	NS	NS	0.000745	NS	0.0173	NS	NS	NS	NS	NS
1905392	plant organ morphogenesis (GO:1905392)	NS	NS	NS	NS	NS	NS	NS	NS	NS	NS	0.00625	0.0408	NS	NS	NS	NS	NS	0.0326	NS	NS	NS	NS	NS	NS	NS	NS	NS	0.00212	NS	NS
6511	ubiquitin-dependent protein catabolic process (GO:0006511)	NS	NS	NS	NS	NS	0.00181	NS	NS	NS	NS	0.000638	0.00014	0.000498	0.00162	NS	5.12e-06	0.000918	2.96e-05	0.0274	NS	NS	NS	NS	NS	NS	NS	NS	NS	NS	NS
43933	protein-containing complex organization (GO:0043933)	NS	NS	NS	NS	NS	0.0122	NS	NS	NS	NS	NS	NS	NS	NS	NS	0.00396	0.026	0.00731	NS	NS	0.0079	NS	NS	NS	NS	0.000287	0.0213	NS	NS	NS
6739	NADP metabolic process (GO:0006739)	NS	NS	NS	NS	NS	0.00765	NS	4.52e-06	NS	0.00356	NS	NS	NS	NS	NS	NS	NS	NS	NS	NS	NS	NS	0.00182	NS	NS	NS	NS	NS	NS	NS
42908	xenobiotic transport (GO:0042908)	NS	NS	NS	NS	NS	0.0298	NS	NS	NS	0.000899	NS	NS	NS	NS	NS	NS	NS	NS	NS	NS	NS	NS	NS	0.0462	0.0234	NS	NS	NS	NS	NS
140115	export across plasma membrane (GO:0140115)	NS	NS	NS	NS	NS	0.00113	NS	NS	NS	0.000924	NS	NS	NS	NS	NS	NS	NS	NS	NS	NS	0.0084	NS	NS	0.0206	0.0363	NS	NS	NS	NS	NS
46263	nitrotoluene catabolic process (GO:0046263)	NS	NS	NS	NS	NS	NS	NS	NS	NS	0.00427	NS	NS	NS	NS	NS	NS	NS	NS	NS	NS	NS	NS	NS	NS	0.0155	NS	NS	NS	NS	NS
46256	2,4,6-trinitrotoluene catabolic process (GO:0046256)	NS	NS	NS	NS	NS	NS	NS	NS	NS	0.00419	NS	NS	NS	NS	NS	NS	NS	NS	NS	NS	NS	NS	NS	NS	0.0152	NS	NS	NS	NS	NS
15849	organic acid transport (GO:0015849)	NS	NS	NS	NS	NS	NS	NS	0.0139	NS	NS	NS	NS	NS	NS	NS	NS	NS	NS	NS	NS	NS	NS	0.00334	NS	NS	NS	NS	NS	NS	NS
9643	photosynthetic acclimation (GO:0009643)	NS	NS	NS	NS	NS	0.0447	NS	NS	NS	NS	NS	NS	NS	NS	NS	0.00993	0.0356	0.0419	NS	NS	NS	NS	NS	NS	NS	NS	NS	NS	NS	NS
30968	endoplasmic reticulum unfolded protein response (GO:0030968)	NS	NS	NS	NS	NS	NS	NS	NS	0.000976	NS	NS	NS	NS	NS	NS	NS	NS	NS	NS	NS	NS	NS	NS	0.0166	NS	NS	NS	NS	NS	NS
46890	regulation of lipid biosynthetic process (GO:0046890)	NS	NS	NS	NS	NS	0.00879	NS	NS	NS	NS	NS	NS	NS	NS	NS	NS	NS	NS	NS	NS	0.0243	NS	0.0498	NS	NS	NS	NS	NS	NS	NS
72351	tricarboxylic acid biosynthetic process (GO:0072351)	NS	NS	NS	NS	NS	NS	NS	0.00337	0.0308	NS	NS	NS	NS	NS	NS	NS	NS	NS	NS	NS	NS	NS	0.0159	NS	NS	NS	NS	NS	NS	NS
30417	nicotianamine metabolic process (GO:0030417)	NS	NS	NS	NS	NS	NS	NS	0.0034	0.0311	NS	NS	NS	NS	NS	NS	NS	NS	NS	NS	NS	NS	NS	0.016	NS	NS	NS	NS	NS	NS	NS
35967	cellular response to topologically incorrect protein (GO:0035967)	NS	NS	NS	NS	NS	NS	NS	NS	0.00366	NS	NS	NS	NS	NS	NS	NS	NS	NS	NS	NS	NS	NS	NS	0.0489	NS	NS	NS	NS	NS	NS
10304	PSII associated light-harvesting complex II catabolic process (GO:0010304)	NS	NS	NS	NS	NS	0.0149	NS	0.0275	0.0045	NS	NS	NS	NS	NS	NS	NS	NS	NS	NS	NS	NS	NS	NS	0.0246	NS	NS	NS	NS	NS	NS
72491	toluene-containing compound catabolic process (GO:0072491)	NS	NS	NS	NS	NS	NS	NS	NS	NS	0.00415	NS	NS	NS	NS	NS	NS	NS	NS	NS	NS	NS	NS	NS	NS	0.0151	NS	NS	NS	NS	NS
10928	regulation of auxin mediated signaling pathway (GO:0010928)	NS	NS	NS	NS	NS	0.00646	NS	NS	NS	NS	NS	NS	NS	NS	NS	NS	NS	NS	NS	NS	0.00277	NS	NS	NS	NS	NS	NS	NS	NS	NS
9636	response to toxic substance (GO:0009636)	NS	NS	NS	NS	NS	0.00137	0.0337	0.0167	0.00174	1.16e-07	NS	NS	NS	NS	NS	NS	NS	NS	NS	NS	4.04e-05	0.0056	0.0337	0.0216	9.01e-06	NS	NS	NS	NS	NS
35336	long-chain fatty-acyl-CoA metabolic process (GO:0035336)	NS	NS	NS	NS	NS	NS	NS	NS	NS	0.00223	NS	NS	NS	NS	NS	NS	NS	NS	NS	NS	NS	NS	NS	NS	0.015	NS	NS	NS	NS	NS
45490	pectin catabolic process (GO:0045490)	NS	NS	NS	NS	NS	NS	NS	0.00331	NS	NS	NS	NS	NS	NS	NS	NS	NS	NS	NS	NS	NS	NS	0.0225	NS	NS	NS	NS	NS	NS	NS
42547	cell wall modification involved in multidimensional cell growth (GO:0042547)	NS	NS	NS	NS	NS	0.0448	NS	NS	NS	NS	NS	NS	NS	NS	NS	NS	NS	NS	NS	NS	NS	NS	0.042	NS	NS	NS	NS	NS	NS	NS
43414	macromolecule methylation (GO:0043414)	NS	NS	NS	NS	NS	0.0254	NS	NS	NS	NS	NS	NS	NS	NS	NS	NS	NS	NS	NS	NS	0.0184	NS	NS	NS	NS	NS	NS	NS	NS	NS
6098	pentose-phosphate shunt (GO:0006098)	NS	NS	NS	NS	NS	0.00245	NS	1.71e-06	NS	0.000808	NS	NS	NS	NS	NS	NS	NS	NS	NS	NS	NS	NS	0.000436	NS	0.0147	NS	NS	NS	NS	NS
46942	carboxylic acid transport (GO:0046942)	NS	NS	NS	NS	NS	NS	NS	0.0126	NS	NS	NS	NS	NS	NS	NS	NS	NS	NS	NS	NS	NS	NS	0.00281	NS	NS	NS	NS	NS	NS	NS
8202	steroid metabolic process (GO:0008202)	NS	NS	NS	NS	NS	NS	NS	0.0137	NS	NS	NS	NS	NS	NS	NS	NS	NS	NS	NS	NS	NS	NS	0.039	NS	NS	NS	NS	NS	NS	NS
72490	toluene-containing compound metabolic process (GO:0072490)	NS	NS	NS	NS	NS	NS	NS	NS	NS	0.00412	NS	NS	NS	NS	NS	NS	NS	NS	NS	NS	NS	NS	NS	NS	0.015	NS	NS	NS	NS	NS
30418	nicotianamine biosynthetic process (GO:0030418)	NS	NS	NS	NS	NS	NS	NS	0.00342	0.0314	NS	NS	NS	NS	NS	NS	NS	NS	NS	NS	NS	NS	NS	0.016	NS	NS	NS	NS	NS	NS	NS
60341	regulation of cellular localization (GO:0060341)	NS	NS	NS	NS	NS	NS	NS	NS	NS	NS	NS	NS	NS	NS	NS	NS	NS	NS	NS	NS	0.00739	NS	NS	NS	NS	0.0175	NS	0.0434	NS	NS
32880	regulation of protein localization (GO:0032880)	NS	NS	NS	NS	NS	NS	NS	NS	NS	NS	NS	NS	NS	NS	NS	NS	NS	NS	NS	NS	0.0102	NS	NS	NS	NS	0.00483	NS	0.0154	NS	NS
71322	cellular response to carbohydrate stimulus (GO:0071322)	NS	NS	NS	NS	NS	NS	NS	NS	NS	NS	NS	NS	NS	NS	NS	NS	NS	NS	NS	NS	NS	0.0486	NS	NS	NS	NS	0.0468	0.037	0.00122	NS
9819	drought recovery (GO:0009819)	NS	NS	NS	NS	NS	NS	NS	NS	NS	NS	NS	NS	NS	NS	NS	NS	NS	NS	NS	NS	0.042	NS	NS	NS	NS	NS	0.0217	0.00675	NS	0.0249
8643	carbohydrate transport (GO:0008643)	NS	NS	NS	NS	NS	NS	NS	NS	NS	NS	NS	NS	NS	NS	NS	NS	NS	NS	NS	NS	NS	NS	0.0194	NS	NS	NS	NS	NS	NS	0.0381
34050	symbiont-induced defense-related programmed cell death (GO:0034050)	NS	NS	NS	NS	NS	NS	NS	NS	NS	NS	0.00335	NS	0.0106	0.00365	NS	NS	NS	NS	NS	NS	0.039	NS	NS	NS	NS	NS	NS	NS	NS	NS
9626	plant-type hypersensitive response (GO:0009626)	NS	NS	NS	NS	NS	NS	NS	NS	NS	NS	0.00272	NS	0.00892	0.0031	NS	NS	NS	NS	NS	NS	0.0339	NS	NS	NS	NS	NS	NS	NS	NS	NS
2213	defense response to insect (GO:0002213)	NS	NS	NS	NS	NS	NS	NS	NS	NS	NS	NS	0.0269	0.00149	NS	NS	NS	NS	NS	NS	NS	0.0347	NS	NS	NS	NS	NS	NS	NS	NS	NS
10410	hemicellulose metabolic process (GO:0010410)	NS	NS	NS	NS	NS	NS	NS	NS	NS	NS	NS	NS	NS	0.0451	0.013	NS	NS	NS	NS	NS	NS	NS	0.0345	NS	NS	NS	NS	NS	NS	NS
6281	DNA repair (GO:0006281)	NS	NS	NS	NS	NS	NS	NS	NS	NS	NS	NS	NS	NS	NS	NS	NS	NS	3.33e-05	NS	NS	0.00177	NS	0.01	NS	NS	NS	NS	NS	NS	NS
103	sulfate assimilation (GO:0000103)	NS	NS	NS	NS	NS	NS	NS	NS	NS	NS	NS	NS	NS	NS	NS	0.00707	NS	NS	NS	0.0061	NS	NS	0.0222	NS	NS	NS	NS	NS	NS	NS
27	ribosomal large subunit assembly (GO:0000027)	NS	NS	NS	NS	NS	NS	NS	NS	NS	NS	NS	NS	NS	NS	NS	0.024	0.0381	0.00431	NS	NS	NS	NS	NS	NS	NS	NS	NS	NS	NS	NS
34654	nucleobase-containing compound biosynthetic process (GO:0034654)	NS	NS	NS	NS	NS	NS	NS	NS	NS	NS	NS	NS	NS	NS	NS	NS	0.00848	0.000616	NS	NS	NS	NS	NS	NS	0.0462	NS	NS	NS	NS	NS
6310	DNA recombination (GO:0006310)	NS	NS	NS	NS	NS	NS	NS	NS	NS	NS	NS	NS	NS	NS	NS	NS	NS	8.63e-05	NS	NS	0.0201	NS	NS	NS	NS	NS	NS	NS	NS	NS
10256	endomembrane system organization (GO:0010256)	NS	NS	NS	NS	NS	NS	NS	NS	NS	NS	NS	NS	NS	NS	NS	NS	NS	0.0255	NS	NS	NS	NS	0.0273	NS	NS	NS	NS	NS	NS	NS
80168	abscisic acid transport (GO:0080168)	NS	NS	0.0292	NS	NS	NS	NS	NS	NS	NS	NS	NS	0.0256	NS	NS	NS	NS	NS	NS	NS	NS	NS	NS	NS	NS	NS	NS	NS	NS	NS
80037	negative regulation of cytokinin-activated signaling pathway (GO:0080037)	NS	NS	0.0419	NS	NS	NS	NS	NS	NS	NS	NS	NS	0.0497	NS	NS	NS	NS	NS	NS	NS	NS	NS	NS	NS	NS	NS	NS	NS	NS	NS
22414	reproductive process (GO:0022414)	NS	0.0261	NS	NS	NS	NS	NS	NS	NS	NS	NS	NS	NS	NS	NS	NS	NS	6.22e-05	NS	NS	NS	NS	NS	NS	NS	NS	NS	NS	NS	NS
3	reproduction (GO:0000003)	NS	0.0217	NS	NS	NS	NS	NS	NS	NS	NS	NS	NS	NS	NS	NS	NS	NS	9.82e-05	NS	NS	NS	NS	NS	NS	NS	NS	NS	NS	NS	NS
2001057	reactive nitrogen species metabolic process (GO:2001057)	NS	NS	NS	NS	NS	NS	NS	0.0367	NS	NS	NS	NS	NS	NS	NS	NS	NS	NS	NS	NS	NS	NS	NS	NS	NS	NS	NS	0.0331	0.0106	NS
6399	tRNA metabolic process (GO:0006399)	NS	NS	NS	NS	NS	0.0301	NS	NS	NS	NS	NS	NS	NS	NS	NS	NS	NS	NS	NS	NS	0.00134	NS	NS	NS	NS	NS	NS	NS	NS	NS
19216	regulation of lipid metabolic process (GO:0019216)	NS	NS	NS	NS	NS	0.0469	NS	NS	NS	NS	NS	NS	NS	NS	NS	NS	NS	NS	NS	NS	0.0393	NS	NS	NS	NS	NS	NS	NS	NS	NS
19747	regulation of isoprenoid metabolic process (GO:0019747)	NS	NS	NS	NS	NS	0.00951	NS	NS	NS	NS	NS	NS	NS	NS	NS	NS	NS	NS	NS	NS	NS	NS	NS	NS	NS	0.0412	NS	NS	NS	NS
51173	positive regulation of nitrogen compound metabolic process (GO:0051173)	NS	NS	NS	NS	NS	0.0387	NS	NS	NS	NS	NS	0.0303	NS	NS	NS	NS	NS	NS	NS	NS	NS	NS	NS	NS	NS	NS	NS	NS	NS	NS
30003	intracellular monoatomic cation homeostasis (GO:0030003)	NS	NS	NS	NS	NS	NS	NS	0.0367	NS	NS	NS	0.0251	NS	NS	NS	NS	NS	NS	NS	NS	NS	NS	NS	NS	NS	NS	NS	NS	NS	NS
6873	intracellular monoatomic ion homeostasis (GO:0006873)	NS	NS	NS	NS	NS	NS	NS	0.0494	NS	NS	NS	0.0146	NS	NS	NS	NS	NS	NS	NS	NS	NS	NS	NS	NS	NS	NS	NS	NS	NS	NS
48367	shoot system development (GO:0048367)	NS	NS	NS	NS	NS	NS	NS	NS	NS	NS	0.0156	0.00537	NS	NS	NS	NS	NS	0.00529	NS	NS	NS	NS	NS	NS	NS	0.0354	0.0244	0.000447	NS	NS
31324	negative regulation of cellular metabolic process (GO:0031324)	NS	NS	NS	NS	NS	NS	NS	NS	NS	NS	2.4e-05	0.0163	NS	NS	NS	NS	NS	NS	NS	NS	NS	NS	NS	NS	NS	0.000862	0.0294	NS	NS	NS
7140	male meiotic nuclear division (GO:0007140)	NS	NS	NS	NS	NS	NS	NS	0.018	NS	NS	NS	NS	NS	NS	NS	NS	NS	0.0167	NS	0.00228	NS	NS	NS	NS	NS	NS	NS	NS	NS	NS
9734	auxin-activated signaling pathway (GO:0009734)	NS	NS	NS	NS	NS	NS	NS	NS	NS	NS	8.94e-05	0.0188	NS	NS	NS	NS	NS	NS	NS	NS	NS	NS	NS	NS	NS	0.00734	NS	NS	NS	NS
42254	ribosome biogenesis (GO:0042254)	NS	NS	NS	NS	NS	NS	NS	NS	NS	NS	NS	0.0386	2.42e-07	0.0235	NS	0.00151	0.0384	0.000196	NS	NS	NS	NS	0.00495	NS	NS	NS	NS	NS	NS	0.0142
9309	amine biosynthetic process (GO:0009309)	NS	NS	NS	NS	NS	NS	NS	NS	0.0476	NS	NS	NS	NS	NS	NS	0.0379	NS	NS	0.00549	NS	NS	NS	NS	NS	NS	NS	NS	NS	NS	NS
42401	biogenic amine biosynthetic process (GO:0042401)	NS	NS	NS	NS	NS	NS	NS	NS	0.0472	NS	NS	NS	NS	NS	NS	0.0379	NS	NS	0.00546	NS	NS	NS	NS	NS	NS	NS	NS	NS	NS	NS
38	very long-chain fatty acid metabolic process (GO:0000038)	NS	NS	NS	NS	NS	NS	NS	NS	NS	NS	NS	NS	NS	NS	NS	0.000138	0.0485	0.00397	NS	NS	NS	NS	NS	NS	NS	0.0129	NS	NS	NS	NS
32543	mitochondrial translation (GO:0032543)	NS	NS	NS	NS	NS	NS	NS	NS	NS	NS	NS	NS	NS	NS	NS	0.0368	0.0496	0.00225	NS	NS	NS	NS	NS	NS	NS	NS	NS	NS	NS	NS
71453	cellular response to oxygen levels (GO:0071453)	1.04e-14	1.94e-25	2.15e-17	3.73e-07	3.31e-07	2.63e-23	NS	1.8e-05	0.0111	0.0163	4.2e-10	1.34e-28	2.62e-34	4.61e-13	1.33e-13	0.0371	NS	0.049	NS	NS	1.24e-43	3.28e-21	1.71e-23	2.8e-10	1.24e-09	8.49e-13	7.78e-17	2.18e-17	1.5e-09	9.27e-11
9083	branched-chain amino acid catabolic process (GO:0009083)	NS	NS	NS	NS	NS	NS	NS	NS	NS	NS	0.0235	0.0129	0.0238	0.00503	0.000688	NS	NS	NS	NS	NS	NS	NS	NS	NS	NS	NS	NS	NS	0.0275	0.00565
9926	auxin polar transport (GO:0009926)	NS	NS	NS	NS	NS	NS	NS	NS	NS	NS	0.000112	0.00263	0.00333	0.00963	NS	NS	NS	NS	NS	NS	NS	NS	NS	NS	NS	0.00726	0.00485	0.0108	0.0276	NS
10558	negative regulation of macromolecule biosynthetic process (GO:0010558)	NS	NS	NS	NS	NS	NS	NS	NS	NS	NS	6.46e-05	0.0406	NS	NS	NS	NS	NS	NS	NS	NS	NS	NS	NS	NS	NS	0.026	NS	NS	NS	NS
10492	maintenance of shoot apical meristem identity (GO:0010492)	NS	NS	NS	NS	NS	NS	NS	NS	NS	NS	NS	0.0391	NS	0.027	NS	NS	NS	NS	NS	NS	NS	NS	NS	NS	NS	NS	0.00305	0.00702	NS	NS
9873	ethylene-activated signaling pathway (GO:0009873)	NS	NS	NS	NS	NS	NS	NS	NS	NS	NS	NS	0.000227	7.41e-05	NS	NS	NS	NS	NS	NS	NS	NS	NS	NS	NS	NS	NS	0.0193	0.0064	NS	NS
90421	embryonic meristem initiation (GO:0090421)	NS	NS	NS	NS	NS	NS	NS	NS	NS	NS	0.023	0.0489	NS	NS	NS	NS	NS	NS	NS	NS	NS	NS	NS	NS	NS	NS	NS	0.0111	NS	NS
51560	mitochondrial calcium ion homeostasis (GO:0051560)	NS	NS	NS	NS	NS	NS	NS	NS	NS	NS	NS	0.0361	NS	NS	NS	NS	NS	NS	NS	NS	NS	NS	NS	NS	NS	NS	0.0451	NS	NS	NS
1900037	regulation of cellular response to hypoxia (GO:1900037)	NS	NS	NS	NS	NS	NS	NS	NS	NS	NS	0.0204	0.0161	0.0197	NS	0.00308	NS	NS	NS	NS	NS	NS	NS	NS	NS	NS	NS	NS	NS	NS	0.0143
72665	protein localization to vacuole (GO:0072665)	NS	NS	NS	NS	NS	NS	NS	NS	NS	NS	8.68e-05	0.0291	9.25e-05	0.000237	NS	NS	NS	NS	NS	NS	NS	NS	NS	NS	NS	NS	NS	NS	0.0312	NS
22411	cellular component disassembly (GO:0022411)	NS	NS	NS	NS	NS	NS	NS	NS	NS	NS	0.000342	0.00112	0.000397	0.0155	NS	NS	NS	NS	NS	NS	NS	NS	NS	NS	NS	NS	NS	0.00078	NS	NS
30258	lipid modification (GO:0030258)	NS	NS	NS	NS	NS	NS	NS	NS	NS	NS	NS	NS	0.00278	NS	NS	NS	NS	NS	NS	NS	NS	NS	NS	NS	NS	NS	NS	0.00754	NS	NS
50776	regulation of immune response (GO:0050776)	NS	NS	NS	NS	NS	NS	NS	NS	NS	NS	0.000285	1.31e-05	7.82e-10	0.0017	NS	NS	NS	NS	NS	NS	NS	NS	NS	NS	NS	0.00129	0.00151	3.95e-05	0.0281	NS
9593	detection of chemical stimulus (GO:0009593)	NS	NS	NS	NS	NS	NS	NS	NS	NS	NS	NS	NS	0.00387	NS	NS	NS	NS	NS	NS	NS	NS	NS	NS	NS	NS	NS	NS	0.00905	NS	NS
10071	root meristem specification (GO:0010071)	NS	NS	NS	NS	NS	NS	NS	NS	NS	NS	0.011	NS	NS	0.0189	NS	NS	NS	NS	NS	NS	NS	NS	NS	NS	NS	0.0267	NS	0.00276	0.00125	NS
9403	toxin biosynthetic process (GO:0009403)	NS	NS	NS	NS	NS	NS	NS	NS	NS	NS	NS	NS	0.00149	NS	NS	NS	NS	NS	NS	NS	NS	NS	NS	NS	NS	NS	NS	0.0184	NS	NS
10605	negative regulation of macromolecule metabolic process (GO:0010605)	NS	NS	NS	NS	NS	NS	NS	NS	NS	NS	5.88e-05	0.00833	NS	NS	NS	NS	NS	NS	NS	NS	NS	NS	NS	NS	NS	0.0172	NS	NS	NS	NS
16042	lipid catabolic process (GO:0016042)	NS	NS	NS	NS	NS	NS	NS	NS	NS	NS	0.000287	1.32e-05	5.25e-06	0.00171	NS	NS	NS	NS	NS	NS	NS	NS	NS	NS	NS	NS	0.0401	0.00757	0.00708	NS
9694	jasmonic acid metabolic process (GO:0009694)	NS	NS	NS	NS	NS	NS	NS	NS	NS	NS	NS	NS	0.00318	NS	NS	NS	NS	NS	NS	NS	NS	NS	NS	NS	NS	NS	0.022	0.0162	NS	NS
9850	auxin metabolic process (GO:0009850)	NS	NS	NS	NS	NS	NS	NS	NS	NS	NS	0.016	0.00206	NS	NS	NS	NS	NS	NS	NS	NS	NS	NS	NS	NS	NS	0.0407	0.00966	NS	NS	NS
31327	negative regulation of cellular biosynthetic process (GO:0031327)	NS	NS	NS	NS	NS	NS	NS	NS	NS	NS	2.41e-05	0.0456	NS	NS	NS	NS	NS	NS	NS	NS	NS	NS	NS	NS	NS	0.0187	NS	NS	NS	NS
7031	peroxisome organization (GO:0007031)	NS	NS	NS	NS	NS	NS	NS	NS	NS	NS	NS	0.00293	0.022	NS	NS	NS	NS	NS	NS	NS	NS	NS	NS	NS	NS	NS	0.0349	NS	NS	NS
9892	negative regulation of metabolic process (GO:0009892)	NS	NS	NS	NS	NS	NS	NS	NS	NS	NS	1.32e-05	0.00267	NS	NS	NS	NS	NS	NS	NS	NS	NS	NS	NS	NS	NS	0.00107	0.0149	NS	NS	NS
9890	negative regulation of biosynthetic process (GO:0009890)	NS	NS	NS	NS	NS	NS	NS	NS	NS	NS	2.72e-05	0.0324	NS	NS	NS	NS	NS	NS	NS	NS	NS	NS	NS	NS	NS	0.0229	NS	NS	NS	NS
9583	detection of light stimulus (GO:0009583)	NS	NS	NS	NS	NS	NS	NS	NS	NS	NS	0.0229	0.0133	0.00543	0.0336	NS	NS	NS	NS	NS	NS	NS	NS	NS	NS	NS	0.00356	0.00498	0.000703	0.00666	NS
2764	immune response-regulating signaling pathway (GO:0002764)	NS	NS	NS	NS	NS	NS	NS	NS	NS	NS	2.66e-05	0.00016	1.41e-07	0.00564	NS	NS	NS	NS	NS	NS	NS	NS	NS	NS	NS	0.00186	0.00943	0.00172	NS	NS
45892	negative regulation of DNA-templated transcription (GO:0045892)	NS	NS	NS	NS	NS	NS	NS	NS	NS	NS	0.0343	NS	NS	NS	0.0225	NS	NS	NS	NS	NS	NS	NS	NS	NS	NS	NS	NS	NS	NS	0.038
2758	innate immune response-activating signaling pathway (GO:0002758)	NS	NS	NS	NS	NS	NS	NS	NS	NS	NS	6.12e-05	0.000391	3.52e-07	0.0147	NS	NS	NS	NS	NS	NS	NS	NS	NS	NS	NS	0.00273	0.0294	0.00251	NS	NS
9581	detection of external stimulus (GO:0009581)	NS	NS	NS	NS	NS	NS	NS	NS	NS	NS	0.0109	0.00545	0.0112	0.031	NS	NS	NS	NS	NS	NS	NS	NS	NS	NS	NS	0.000593	0.000538	0.000502	0.00372	NS
70588	calcium ion transmembrane transport (GO:0070588)	NS	NS	NS	NS	NS	NS	NS	NS	NS	NS	NS	0.0181	NS	NS	NS	NS	NS	NS	NS	NS	NS	NS	NS	NS	NS	NS	0.00969	NS	NS	NS
6670	sphingosine metabolic process (GO:0006670)	NS	NS	NS	NS	NS	NS	NS	NS	NS	NS	0.0336	0.0232	0.034	0.00552	NS	NS	NS	NS	NS	NS	NS	NS	NS	NS	NS	NS	NS	NS	0.00584	NS
48827	phyllome development (GO:0048827)	NS	NS	NS	NS	NS	NS	NS	NS	NS	NS	0.036	0.0446	NS	NS	NS	NS	NS	NS	NS	NS	NS	NS	NS	NS	NS	0.0373	NS	0.000836	NS	NS
60147	regulation of post-transcriptional gene silencing (GO:0060147)	NS	NS	NS	NS	NS	NS	NS	NS	NS	NS	0.00575	0.00348	NS	NS	NS	NS	NS	NS	NS	NS	NS	NS	NS	NS	NS	NS	NS	NS	NS	NS
7584	response to nutrient (GO:0007584)	NS	NS	NS	NS	NS	NS	NS	NS	NS	NS	NS	0.00837	0.00246	0.00728	0.00162	NS	NS	NS	NS	NS	NS	NS	NS	NS	NS	NS	0.0173	0.00762	NS	0.0255
9742	brassinosteroid mediated signaling pathway (GO:0009742)	NS	NS	NS	NS	NS	NS	NS	NS	NS	NS	0.00116	0.0217	0.00135	0.0149	0.00108	NS	NS	NS	NS	NS	NS	NS	NS	NS	NS	0.0452	NS	NS	NS	0.00617
6851	mitochondrial calcium ion transmembrane transport (GO:0006851)	NS	NS	NS	NS	NS	NS	NS	NS	NS	NS	NS	0.0364	NS	NS	NS	NS	NS	NS	NS	NS	NS	NS	NS	NS	NS	NS	0.0455	NS	NS	NS
52317	camalexin metabolic process (GO:0052317)	NS	NS	NS	NS	NS	NS	NS	NS	NS	NS	NS	NS	0.000432	NS	NS	NS	NS	NS	NS	NS	NS	NS	NS	NS	NS	NS	NS	0.0248	NS	NS
6552	leucine catabolic process (GO:0006552)	NS	NS	NS	NS	NS	NS	NS	NS	NS	NS	0.0491	0.00357	0.0501	0.0114	0.00397	NS	NS	NS	NS	NS	NS	NS	NS	NS	NS	NS	0.0452	NS	NS	0.0278
2009	morphogenesis of an epithelium (GO:0002009)	NS	NS	NS	NS	NS	NS	NS	NS	NS	NS	0.0204	0.0161	0.0198	0.00696	NS	NS	NS	NS	NS	NS	NS	NS	NS	NS	NS	NS	NS	NS	0.0232	NS
90697	post-embryonic plant organ morphogenesis (GO:0090697)	NS	NS	NS	NS	NS	NS	NS	NS	NS	NS	0.0162	0.00964	NS	NS	NS	NS	NS	NS	NS	NS	NS	NS	NS	NS	NS	NS	NS	NS	NS	NS
45934	negative regulation of nucleobase-containing compound metabolic process (GO:0045934)	NS	NS	NS	NS	NS	NS	NS	NS	NS	NS	0.0142	NS	NS	NS	0.0381	NS	NS	NS	NS	NS	NS	NS	NS	NS	NS	0.0171	NS	NS	NS	0.0458
40008	regulation of growth (GO:0040008)	NS	NS	NS	NS	NS	NS	NS	NS	NS	NS	0.00034	0.00196	NS	0.0393	0.00122	NS	NS	NS	NS	NS	NS	NS	NS	NS	NS	NS	0.0385	NS	NS	NS
34311	diol metabolic process (GO:0034311)	NS	NS	NS	NS	NS	NS	NS	NS	NS	NS	NS	NS	NS	0.0174	NS	NS	NS	NS	NS	NS	NS	NS	NS	NS	NS	NS	NS	NS	0.0253	NS
9638	phototropism (GO:0009638)	NS	NS	NS	NS	NS	NS	NS	NS	NS	NS	0.0103	NS	0.0106	0.0495	NS	NS	NS	NS	NS	NS	NS	NS	NS	NS	NS	0.0297	0.0362	0.00786	NS	0.0442
70483	detection of hypoxia (GO:0070483)	NS	NS	NS	NS	NS	NS	NS	NS	NS	NS	0.026	NS	0.00189	0.00603	0.0405	NS	NS	NS	NS	NS	NS	NS	NS	NS	NS	NS	NS	0.0255	0.0289	NS
48856	anatomical structure development (GO:0048856)	NS	0.0117	NS	NS	NS	0.000422	0.0433	0.0226	NS	NS	0.0012	NS	NS	NS	NS	0.012	0.00391	6.79e-11	NS	NS	0.0237	NS	NS	NS	NS	8.33e-07	0.00199	9.17e-09	NS	NS
1905037	autophagosome organization (GO:1905037)	NS	NS	NS	NS	NS	NS	NS	NS	NS	NS	0.00383	0.00151	3.29e-06	0.000622	0.000892	NS	NS	NS	NS	NS	NS	NS	NS	NS	NS	NS	0.0451	0.00383	0.00531	0.0184
6396	RNA processing (GO:0006396)	NS	0.0232	NS	NS	NS	2.9e-05	NS	0.00175	NS	NS	0.006	NS	NS	NS	NS	NS	NS	NS	0.00026	0.0131	4.88e-07	0.000124	2.89e-05	NS	0.0109	NS	NS	NS	NS	0.00027
7033	vacuole organization (GO:0007033)	NS	NS	NS	NS	NS	NS	NS	NS	NS	NS	0.000885	0.000601	3.41e-05	0.00038	0.00173	NS	NS	NS	NS	NS	NS	NS	NS	NS	NS	NS	NS	NS	0.00962	NS
9749	response to glucose (GO:0009749)	NS	NS	0.0471	NS	NS	NS	NS	NS	NS	NS	0.0234	NS	NS	NS	NS	NS	NS	NS	NS	NS	NS	0.0094	0.0131	0.0293	0.00284	NS	NS	NS	0.0148	NS
1901565	organonitrogen compound catabolic process (GO:1901565)	NS	NS	NS	NS	NS	NS	NS	NS	NS	NS	0.000136	2.63e-08	6.69e-08	1.98e-07	0.0126	NS	NS	NS	NS	NS	NS	NS	NS	NS	NS	0.01	0.000365	0.000607	1.02e-07	NS
6468	protein phosphorylation (GO:0006468)	NS	NS	NS	NS	NS	NS	NS	NS	NS	NS	8.71e-05	8.57e-05	1.34e-10	2.15e-05	NS	NS	NS	NS	NS	NS	NS	NS	NS	NS	NS	NS	0.0468	3.59e-08	0.00208	NS
6643	membrane lipid metabolic process (GO:0006643)	NS	NS	NS	NS	NS	NS	NS	NS	NS	NS	0.00181	0.0155	1.52e-05	0.00962	NS	NS	NS	NS	NS	NS	NS	NS	NS	NS	NS	NS	NS	0.00428	0.0178	NS
2237	response to molecule of bacterial origin (GO:0002237)	NS	NS	NS	NS	NS	NS	NS	NS	NS	NS	0.0348	0.0157	6.28e-06	0.021	NS	NS	NS	NS	NS	NS	NS	NS	NS	NS	NS	NS	NS	0.0118	NS	NS
32502	developmental process (GO:0032502)	NS	0.0111	NS	NS	NS	0.000874	NS	0.0359	NS	NS	0.00132	NS	NS	NS	NS	0.0155	0.00419	2.19e-10	NS	NS	NS	NS	NS	NS	NS	1.27e-06	0.00191	4.67e-08	NS	NS
6338	chromatin remodeling (GO:0006338)	NS	NS	NS	NS	NS	0.000135	NS	0.0275	NS	NS	0.00317	NS	NS	NS	NS	NS	NS	NS	NS	NS	0.0251	NS	NS	NS	NS	NS	NS	NS	NS	NS
71824	protein-DNA complex organization (GO:0071824)	NS	NS	NS	NS	NS	0.000325	NS	0.0434	NS	NS	0.00599	NS	NS	NS	NS	NS	NS	NS	NS	NS	0.00483	NS	NS	NS	NS	NS	NS	NS	NS	NS
52315	phytoalexin biosynthetic process (GO:0052315)	NS	NS	NS	NS	NS	NS	NS	NS	NS	NS	NS	NS	0.00149	NS	NS	NS	NS	NS	NS	NS	NS	NS	NS	NS	NS	NS	NS	0.0183	NS	NS
48545	response to steroid hormone (GO:0048545)	NS	NS	NS	NS	NS	NS	NS	NS	NS	NS	0.00297	0.0487	0.00332	0.025	0.00197	NS	NS	NS	NS	NS	NS	NS	NS	NS	NS	NS	NS	NS	NS	0.00461
48528	post-embryonic root development (GO:0048528)	NS	NS	NS	NS	NS	NS	NS	0.0399	NS	NS	0.0232	NS	NS	NS	NS	NS	NS	NS	NS	NS	NS	NS	0.0246	NS	NS	0.0451	NS	NS	NS	NS
32501	multicellular organismal process (GO:0032501)	NS	NS	NS	NS	NS	0.0208	NS	0.0359	NS	NS	0.00901	NS	NS	NS	NS	0.0246	NS	7.74e-09	NS	NS	NS	NS	NS	NS	NS	1.9e-05	0.0384	1.15e-05	NS	NS
1900424	regulation of defense response to bacterium (GO:1900424)	NS	NS	NS	NS	NS	NS	NS	NS	NS	NS	NS	0.00367	2.37e-05	NS	NS	NS	NS	NS	NS	NS	NS	NS	NS	NS	NS	NS	0.00407	0.00025	NS	NS
45184	establishment of protein localization (GO:0045184)	0.00908	NS	0.0134	NS	NS	NS	NS	NS	NS	NS	0.000674	NS	NS	NS	NS	NS	NS	NS	NS	NS	0.00811	0.0132	0.000244	NS	0.0256	NS	NS	NS	NS	NS
60255	regulation of macromolecule metabolic process (GO:0060255)	NS	NS	NS	NS	NS	NS	NS	NS	NS	NS	5.1e-07	0.00182	NS	0.0173	0.00177	NS	NS	NS	NS	NS	NS	NS	NS	NS	NS	NS	0.0231	0.0343	NS	NS
48523	negative regulation of cellular process (GO:0048523)	NS	NS	NS	NS	NS	NS	NS	NS	NS	NS	1.77e-07	6.18e-05	0.0125	NS	0.0102	NS	NS	NS	NS	NS	NS	NS	NS	NS	NS	0.000419	0.000411	8.7e-05	NS	NS
377	RNA splicing, via transesterification reactions with bulged adenosine as nucleophile (GO:0000377)	NS	NS	NS	NS	NS	0.00273	NS	NS	NS	NS	0.000142	NS	NS	NS	NS	0.00327	NS	0.0227	0.0169	NS	0.00274	0.0334	NS	NS	NS	NS	NS	NS	NS	NS
8380	RNA splicing (GO:0008380)	NS	NS	NS	NS	NS	0.00437	NS	NS	NS	NS	0.000172	NS	NS	NS	NS	0.0248	NS	NS	0.00884	NS	0.00176	NS	NS	NS	NS	NS	NS	NS	NS	NS
9062	fatty acid catabolic process (GO:0009062)	NS	NS	NS	NS	NS	NS	NS	NS	NS	NS	NS	0.00411	0.000956	NS	NS	NS	NS	NS	NS	NS	NS	NS	NS	NS	NS	NS	NS	0.0467	NS	NS
9566	fertilization (GO:0009566)	NS	NS	NS	NS	NS	NS	NS	NS	NS	NS	NS	NS	0.0494	NS	NS	NS	NS	NS	NS	NS	NS	NS	NS	NS	NS	NS	NS	0.0327	NS	NS
16071	mRNA metabolic process (GO:0016071)	NS	NS	NS	NS	NS	0.0302	NS	NS	NS	NS	3.72e-06	NS	NS	NS	NS	7.73e-07	0.0361	0.0278	0.000764	NS	0.0073	0.0202	0.0149	NS	NS	NS	NS	NS	NS	NS
375	RNA splicing, via transesterification reactions (GO:0000375)	NS	NS	NS	NS	NS	0.00272	NS	NS	NS	NS	0.000142	NS	NS	NS	NS	0.00326	NS	0.0227	0.0168	NS	0.00273	0.0332	NS	NS	NS	NS	NS	NS	NS	NS
9741	response to brassinosteroid (GO:0009741)	NS	NS	NS	NS	NS	NS	NS	NS	NS	NS	6.3e-05	0.000218	2.51e-05	0.00285	3.21e-06	NS	NS	NS	NS	NS	NS	NS	NS	NS	NS	0.00592	0.00821	0.00761	0.0246	5.32e-05
2218	activation of innate immune response (GO:0002218)	NS	NS	NS	NS	NS	NS	NS	NS	NS	NS	0.000886	0.00313	3.77e-06	0.0302	NS	NS	NS	NS	NS	NS	NS	NS	NS	NS	NS	0.00061	NS	0.00377	NS	NS
6569	tryptophan catabolic process (GO:0006569)	NS	NS	NS	NS	NS	NS	NS	NS	NS	NS	NS	0.00359	0.0503	NS	NS	NS	NS	NS	NS	NS	NS	NS	NS	NS	NS	NS	0.0453	NS	NS	NS
61024	membrane organization (GO:0061024)	NS	NS	NS	NS	NS	NS	NS	NS	NS	NS	NS	0.0341	0.0042	NS	NS	NS	NS	NS	NS	NS	NS	NS	NS	NS	NS	NS	0.0415	0.0147	NS	NS
10476	gibberellin mediated signaling pathway (GO:0010476)	NS	NS	NS	NS	NS	NS	NS	NS	NS	NS	NS	0.0157	NS	NS	NS	NS	NS	NS	NS	NS	NS	NS	NS	NS	NS	NS	0.0416	NS	NS	NS
6397	mRNA processing (GO:0006397)	NS	NS	NS	NS	NS	0.000793	NS	NS	NS	NS	2.02e-06	NS	NS	NS	NS	4.95e-05	0.0163	0.00121	0.00797	NS	0.00177	0.00349	0.0367	NS	NS	NS	NS	NS	NS	NS
422	autophagy of mitochondrion (GO:0000422)	NS	NS	NS	NS	NS	NS	NS	NS	NS	NS	0.000524	6.09e-06	3.26e-06	0.00418	0.00248	NS	NS	NS	NS	NS	NS	NS	NS	NS	NS	NS	0.0105	0.012	NS	NS
48268	clathrin coat assembly (GO:0048268)	NS	NS	NS	NS	NS	NS	NS	NS	NS	NS	0.00576	0.0005	0.00597	0.0133	NS	NS	NS	NS	NS	NS	NS	NS	NS	NS	NS	NS	0.0401	NS	NS	NS
36444	calcium import into the mitochondrion (GO:0036444)	NS	NS	NS	NS	NS	NS	NS	NS	NS	NS	NS	0.0358	NS	NS	NS	NS	NS	NS	NS	NS	NS	NS	NS	NS	NS	NS	0.0448	NS	NS	NS
98657	import into cell (GO:0098657)	NS	NS	NS	NS	NS	NS	NS	NS	NS	NS	3.02e-06	0.00327	3.05e-05	0.00142	NS	NS	NS	NS	NS	NS	NS	NS	NS	NS	NS	0.0401	NS	NS	NS	NS
46777	protein autophosphorylation (GO:0046777)	NS	NS	NS	NS	NS	NS	NS	NS	NS	NS	5.35e-05	0.000555	6.43e-07	3.35e-05	NS	NS	NS	NS	NS	NS	NS	NS	NS	NS	NS	0.0255	0.0377	4.1e-05	0.00266	NS
6898	receptor-mediated endocytosis (GO:0006898)	NS	NS	NS	NS	NS	NS	NS	NS	NS	NS	1.82e-05	0.00208	0.0169	0.00477	NS	NS	NS	NS	NS	NS	NS	NS	NS	NS	NS	0.0132	NS	NS	NS	NS
2000377	regulation of reactive oxygen species metabolic process (GO:2000377)	NS	NS	NS	NS	NS	NS	NS	NS	NS	NS	NS	NS	0.0037	NS	NS	NS	NS	NS	NS	NS	NS	NS	NS	NS	NS	0.0207	0.00442	0.00407	NS	NS
1900150	regulation of defense response to fungus (GO:1900150)	NS	NS	NS	NS	NS	NS	NS	NS	NS	NS	NS	NS	0.011	NS	NS	NS	NS	NS	NS	NS	NS	NS	NS	NS	NS	0.0121	NS	0.00432	NS	NS
72594	establishment of protein localization to organelle (GO:0072594)	NS	NS	NS	NS	NS	NS	NS	NS	NS	NS	0.0118	NS	NS	NS	NS	NS	NS	NS	NS	NS	NS	NS	0.033	NS	NS	0.0115	NS	NS	NS	NS
70298	negative regulation of phosphorelay signal transduction system (GO:0070298)	NS	NS	NS	NS	NS	NS	NS	NS	NS	NS	0.0492	0.0305	NS	0.0216	0.00513	NS	NS	NS	NS	NS	NS	NS	NS	NS	NS	NS	NS	NS	NS	0.0176
33365	protein localization to organelle (GO:0033365)	NS	NS	NS	NS	NS	NS	NS	NS	NS	NS	0.0299	NS	NS	NS	NS	NS	NS	NS	NS	NS	NS	NS	0.0282	NS	NS	0.0406	NS	NS	NS	NS
9914	hormone transport (GO:0009914)	NS	NS	NS	NS	NS	NS	NS	NS	NS	NS	8.89e-07	0.000113	3.36e-05	0.00492	NS	NS	NS	NS	NS	NS	NS	NS	NS	NS	NS	0.000508	5.74e-05	5.3e-05	0.0133	NS
6897	endocytosis (GO:0006897)	NS	NS	NS	NS	NS	NS	NS	NS	NS	NS	4.2e-06	0.00612	0.000169	0.00163	NS	NS	NS	NS	NS	NS	NS	NS	NS	NS	NS	0.0253	NS	NS	NS	NS
2253	activation of immune response (GO:0002253)	NS	NS	NS	NS	NS	NS	NS	NS	NS	NS	0.000516	0.0018	4.68e-07	0.0149	NS	NS	NS	NS	NS	NS	NS	NS	NS	NS	NS	0.000795	NS	0.00152	NS	NS
9968	negative regulation of signal transduction (GO:0009968)	NS	NS	NS	NS	NS	NS	NS	NS	NS	NS	0.000919	1.87e-05	0.000451	0.00717	0.00167	NS	NS	NS	NS	NS	NS	NS	NS	NS	NS	NS	0.000273	0.00837	0.037	0.024
16049	cell growth (GO:0016049)	NS	NS	NS	NS	NS	NS	NS	NS	NS	NS	0.00756	NS	NS	0.015	NS	NS	NS	NS	NS	NS	NS	NS	NS	NS	NS	NS	NS	NS	0.0294	NS
9582	detection of abiotic stimulus (GO:0009582)	NS	NS	NS	NS	NS	NS	NS	NS	NS	NS	0.0109	0.00548	0.0112	0.0311	NS	NS	NS	NS	NS	NS	NS	NS	NS	NS	NS	0.000596	0.00054	0.000504	0.00374	NS
1738	morphogenesis of a polarized epithelium (GO:0001738)	NS	NS	NS	NS	NS	NS	NS	NS	NS	NS	0.0205	0.0163	0.02	0.00703	NS	NS	NS	NS	NS	NS	NS	NS	NS	NS	NS	NS	NS	NS	0.0233	NS
51606	detection of stimulus (GO:0051606)	NS	NS	NS	NS	NS	NS	NS	NS	NS	NS	0.000369	0.00316	9.13e-06	0.00164	NS	NS	NS	NS	NS	NS	NS	NS	NS	NS	NS	2.69e-05	0.000654	1.45e-06	0.00177	0.0418
61817	endoplasmic reticulum-plasma membrane tethering (GO:0061817)	NS	NS	NS	NS	NS	NS	NS	NS	NS	NS	NS	0.00115	0.00195	0.0125	NS	NS	NS	NS	NS	NS	NS	NS	NS	NS	NS	NS	0.0387	NS	NS	NS
71407	cellular response to organic cyclic compound (GO:0071407)	NS	NS	NS	NS	NS	NS	NS	NS	NS	NS	0.000296	0.0029	4.46e-05	0.00761	NS	NS	NS	NS	NS	NS	NS	NS	NS	NS	NS	0.00475	0.0273	0.00415	0.0358	0.0185
10105	negative regulation of ethylene-activated signaling pathway (GO:0010105)	NS	NS	NS	NS	NS	NS	NS	NS	NS	NS	0.0491	0.0304	NS	0.0215	0.0051	NS	NS	NS	NS	NS	NS	NS	NS	NS	NS	NS	NS	NS	NS	0.0175
72329	monocarboxylic acid catabolic process (GO:0072329)	NS	NS	NS	NS	NS	NS	NS	NS	NS	NS	NS	0.00219	0.000879	NS	NS	NS	NS	NS	NS	NS	NS	NS	NS	NS	NS	NS	NS	0.0227	NS	NS
160	phosphorelay signal transduction system (GO:0000160)	NS	NS	NS	NS	NS	NS	NS	NS	NS	NS	NS	0.00194	0.00377	NS	NS	NS	NS	NS	NS	NS	NS	NS	NS	NS	NS	NS	NS	0.0266	NS	NS
6874	intracellular calcium ion homeostasis (GO:0006874)	NS	NS	NS	NS	NS	NS	NS	NS	NS	NS	NS	0.027	NS	NS	NS	NS	NS	NS	NS	NS	NS	NS	NS	NS	NS	NS	0.0143	NS	NS	NS
10150	leaf senescence (GO:0010150)	NS	NS	NS	NS	NS	NS	NS	NS	NS	NS	0.0011	2.99e-08	3.9e-09	0.0111	NS	NS	NS	NS	NS	NS	NS	NS	NS	NS	NS	0.00637	4.6e-06	5.63e-07	0.0133	NS
48582	positive regulation of post-embryonic development (GO:0048582)	NS	NS	NS	NS	NS	NS	NS	NS	NS	NS	0.000151	0.006	NS	0.00209	NS	NS	NS	NS	NS	NS	NS	NS	NS	NS	NS	0.00671	0.0142	NS	0.00451	NS
10648	negative regulation of cell communication (GO:0010648)	NS	NS	NS	NS	NS	NS	NS	NS	NS	NS	0.00183	3.79e-05	0.00107	0.0102	0.0023	NS	NS	NS	NS	NS	NS	NS	NS	NS	NS	NS	0.000342	0.00755	0.0458	0.0399
48527	lateral root development (GO:0048527)	NS	NS	NS	NS	NS	NS	NS	NS	NS	NS	0.0154	NS	NS	NS	NS	NS	NS	NS	NS	NS	NS	NS	0.0203	NS	NS	0.0442	NS	NS	NS	NS
72583	clathrin-dependent endocytosis (GO:0072583)	NS	NS	NS	NS	NS	NS	NS	NS	NS	NS	0.000143	0.00365	0.0273	0.0105	NS	NS	NS	NS	NS	NS	NS	NS	NS	NS	NS	0.0294	NS	NS	NS	NS
10325	raffinose family oligosaccharide biosynthetic process (GO:0010325)	NS	NS	NS	NS	NS	NS	NS	NS	NS	NS	NS	0.0465	NS	NS	NS	NS	NS	NS	NS	NS	NS	NS	NS	NS	NS	NS	0.0192	NS	NS	NS
6325	chromatin organization (GO:0006325)	NS	NS	NS	NS	NS	0.000419	NS	NS	NS	NS	0.00115	NS	NS	NS	NS	NS	NS	NS	NS	NS	0.0244	NS	NS	NS	NS	NS	NS	NS	NS	NS
51643	endoplasmic reticulum localization (GO:0051643)	NS	NS	NS	NS	NS	NS	NS	NS	NS	NS	NS	0.00115	0.00194	0.0124	NS	NS	NS	NS	NS	NS	NS	NS	NS	NS	NS	NS	0.0385	NS	NS	NS
1736	establishment of planar polarity (GO:0001736)	NS	NS	NS	NS	NS	NS	NS	NS	NS	NS	0.0205	0.0162	0.0199	0.00699	NS	NS	NS	NS	NS	NS	NS	NS	NS	NS	NS	NS	NS	NS	0.0233	NS
19395	fatty acid oxidation (GO:0019395)	NS	NS	NS	NS	NS	NS	NS	NS	NS	NS	NS	0.00269	0.000548	NS	NS	NS	NS	NS	NS	NS	NS	NS	NS	NS	NS	NS	NS	0.0127	NS	NS
1902532	negative regulation of intracellular signal transduction (GO:1902532)	NS	NS	NS	NS	NS	NS	NS	NS	NS	NS	NS	0.0168	NS	0.0409	0.0108	NS	NS	NS	NS	NS	NS	NS	NS	NS	NS	NS	NS	NS	0.0348	0.0366
9739	response to gibberellin (GO:0009739)	NS	NS	NS	NS	NS	NS	NS	NS	NS	NS	0.0462	6.31e-05	0.0135	NS	0.000372	NS	NS	NS	NS	NS	NS	NS	NS	NS	NS	NS	0.000429	NS	NS	0.00325
10188	response to microbial phytotoxin (GO:0010188)	NS	NS	NS	NS	NS	NS	NS	NS	NS	NS	NS	0.0191	0.0256	NS	NS	NS	NS	NS	NS	NS	NS	NS	NS	NS	NS	NS	0.0192	0.0253	NS	NS
51179	localization (GO:0051179)	NS	NS	NS	NS	NS	NS	NS	NS	NS	NS	4.89e-10	9.73e-07	8.97e-08	0.0142	NS	NS	NS	NS	NS	NS	NS	NS	NS	NS	NS	0.000179	0.00459	0.00142	NS	NS
9891	positive regulation of biosynthetic process (GO:0009891)	NS	NS	NS	NS	NS	0.00101	NS	NS	NS	NS	0.0318	NS	NS	NS	NS	NS	NS	NS	NS	NS	0.00987	NS	NS	NS	NS	NS	NS	NS	NS	NS
7275	multicellular organism development (GO:0007275)	NS	NS	NS	NS	NS	0.0188	NS	NS	NS	NS	0.00176	NS	NS	NS	NS	0.00363	0.0132	4.38e-10	NS	NS	NS	NS	NS	NS	NS	2.65e-07	0.00222	1.16e-07	NS	NS
60429	epithelium development (GO:0060429)	NS	NS	NS	NS	NS	NS	NS	NS	NS	NS	0.0203	0.016	0.0196	0.00692	NS	NS	NS	NS	NS	NS	NS	NS	NS	NS	NS	NS	NS	NS	0.0231	NS
44242	cellular lipid catabolic process (GO:0044242)	NS	NS	NS	NS	NS	NS	NS	NS	NS	NS	0.000383	1.57e-05	1.49e-06	0.00148	NS	NS	NS	NS	NS	NS	NS	NS	NS	NS	NS	0.0293	0.0267	0.00197	0.00374	NS
7602	phototransduction (GO:0007602)	NS	NS	NS	NS	NS	NS	NS	NS	NS	NS	0.0493	0.0306	0.0124	0.0217	NS	NS	NS	NS	NS	NS	NS	NS	NS	NS	NS	0.00483	0.0265	0.00431	0.00331	NS
48731	system development (GO:0048731)	NS	NS	NS	NS	NS	NS	NS	NS	NS	NS	0.000294	NS	NS	NS	NS	NS	NS	1.21e-06	NS	NS	NS	NS	NS	NS	NS	4.2e-05	0.00309	3.21e-06	NS	NS
34312	diol biosynthetic process (GO:0034312)	NS	NS	NS	NS	NS	NS	NS	NS	NS	NS	NS	NS	NS	0.0175	NS	NS	NS	NS	NS	NS	NS	NS	NS	NS	NS	NS	NS	NS	0.0254	NS
16236	macroautophagy (GO:0016236)	NS	NS	NS	NS	NS	NS	NS	NS	NS	NS	0.000681	0.000733	2.63e-06	0.00264	0.00288	NS	NS	NS	NS	NS	NS	NS	NS	NS	NS	NS	NS	0.00836	0.0234	NS
45	autophagosome assembly (GO:0000045)	NS	NS	NS	NS	NS	NS	NS	NS	NS	NS	0.00793	0.00334	7.81e-06	0.00172	0.00284	NS	NS	NS	NS	NS	NS	NS	NS	NS	NS	NS	NS	0.00531	0.0103	0.0386
61919	process utilizing autophagic mechanism (GO:0061919)	NS	NS	NS	NS	NS	NS	NS	NS	NS	NS	1.53e-05	1.11e-05	9.74e-07	0.00216	0.0014	NS	NS	NS	NS	NS	NS	NS	NS	NS	NS	NS	0.015	0.00543	0.0411	NS
6914	autophagy (GO:0006914)	NS	NS	NS	NS	NS	NS	NS	NS	NS	NS	1.51e-05	1.1e-05	9.66e-07	0.00215	0.00138	NS	NS	NS	NS	NS	NS	NS	NS	NS	NS	NS	0.0149	0.00542	0.041	NS
6364	rRNA processing (GO:0006364)	NS	NS	NS	NS	NS	NS	NS	NS	NS	NS	NS	NS	2.38e-05	NS	NS	NS	NS	NS	NS	NS	NS	NS	NS	NS	NS	NS	NS	NS	NS	0.0233
51240	positive regulation of multicellular organismal process (GO:0051240)	NS	NS	NS	NS	NS	NS	NS	NS	NS	NS	5.7e-05	0.00159	NS	0.000209	NS	NS	NS	NS	NS	NS	NS	NS	NS	NS	NS	0.00361	0.00216	NS	0.00165	NS
2000028	regulation of photoperiodism, flowering (GO:2000028)	NS	NS	NS	NS	NS	NS	NS	NS	NS	NS	0.0281	0.00599	NS	0.0123	NS	NS	NS	NS	NS	NS	NS	NS	NS	NS	NS	NS	0.0147	NS	NS	NS
46519	sphingoid metabolic process (GO:0046519)	NS	NS	NS	NS	NS	NS	NS	NS	NS	NS	NS	NS	0.02	0.0101	NS	NS	NS	NS	NS	NS	NS	NS	NS	NS	NS	NS	NS	NS	0.0234	NS
9061	anaerobic respiration (GO:0009061)	NS	NS	NS	NS	NS	NS	NS	NS	NS	NS	NS	0.00148	0.00228	0.0289	NS	NS	NS	NS	NS	NS	NS	NS	NS	NS	NS	NS	0.0318	0.0456	NS	NS
9585	red, far-red light phototransduction (GO:0009585)	NS	NS	NS	NS	NS	NS	NS	NS	NS	NS	0.049	0.0304	0.0123	0.0215	NS	NS	NS	NS	NS	NS	NS	NS	NS	NS	NS	0.00481	0.0265	0.00429	0.0033	NS
51172	negative regulation of nitrogen compound metabolic process (GO:0051172)	NS	NS	NS	NS	NS	NS	NS	NS	NS	NS	0.00307	NS	NS	NS	0.00843	NS	NS	NS	NS	NS	NS	NS	NS	NS	NS	0.00723	NS	NS	NS	0.0309
6164	purine nucleotide biosynthetic process (GO:0006164)	NS	NS	NS	NS	NS	NS	NS	NS	NS	NS	0.00979	NS	NS	NS	NS	NS	0.00897	0.00806	NS	NS	NS	NS	NS	NS	NS	NS	NS	0.0481	NS	NS
52314	phytoalexin metabolic process (GO:0052314)	NS	NS	NS	NS	NS	NS	NS	NS	NS	NS	NS	NS	0.00148	NS	NS	NS	NS	NS	NS	NS	NS	NS	NS	NS	NS	NS	NS	0.0183	NS	NS
90693	plant organ senescence (GO:0090693)	NS	NS	NS	NS	NS	NS	NS	NS	NS	NS	0.00201	1.56e-07	6.68e-09	0.0238	NS	NS	NS	NS	NS	NS	NS	NS	NS	NS	NS	0.0228	5.24e-06	2.26e-07	0.0271	NS
9700	indole phytoalexin biosynthetic process (GO:0009700)	NS	NS	NS	NS	NS	NS	NS	NS	NS	NS	NS	NS	0.00148	NS	NS	NS	NS	NS	NS	NS	NS	NS	NS	NS	NS	NS	NS	0.0181	NS	NS
48729	tissue morphogenesis (GO:0048729)	NS	NS	NS	NS	NS	NS	NS	NS	NS	NS	NS	NS	NS	0.0406	NS	NS	NS	NS	NS	NS	NS	NS	NS	NS	NS	NS	NS	NS	0.013	NS
43401	steroid hormone mediated signaling pathway (GO:0043401)	NS	NS	NS	NS	NS	NS	NS	NS	NS	NS	0.00116	0.0216	0.00134	0.0149	0.00107	NS	NS	NS	NS	NS	NS	NS	NS	NS	NS	0.0451	NS	NS	NS	0.00613
46512	sphingosine biosynthetic process (GO:0046512)	NS	NS	NS	NS	NS	NS	NS	NS	NS	NS	0.0335	0.0231	0.034	0.00549	NS	NS	NS	NS	NS	NS	NS	NS	NS	NS	NS	NS	NS	NS	0.00577	NS
9653	anatomical structure morphogenesis (GO:0009653)	NS	NS	NS	NS	NS	NS	NS	NS	NS	NS	0.0145	NS	NS	NS	NS	NS	NS	0.000353	NS	NS	NS	NS	NS	NS	NS	NS	NS	0.000718	NS	NS
10120	camalexin biosynthetic process (GO:0010120)	NS	NS	NS	NS	NS	NS	NS	NS	NS	NS	NS	NS	0.00043	NS	NS	NS	NS	NS	NS	NS	NS	NS	NS	NS	NS	NS	NS	0.0247	NS	NS
9791	post-embryonic development (GO:0009791)	NS	NS	NS	NS	NS	0.0109	NS	NS	NS	NS	0.0183	NS	NS	NS	NS	0.00858	0.0254	7.34e-08	NS	NS	NS	NS	NS	NS	NS	1.09e-05	0.00773	0.000103	NS	NS
23057	negative regulation of signaling (GO:0023057)	NS	NS	NS	NS	NS	NS	NS	NS	NS	NS	0.00182	3.76e-05	0.00106	0.0102	0.00229	NS	NS	NS	NS	NS	NS	NS	NS	NS	NS	NS	0.00034	0.00753	0.0457	0.0398
1900057	positive regulation of leaf senescence (GO:1900057)	NS	NS	NS	NS	NS	NS	NS	NS	NS	NS	0.0171	0.00966	0.00375	NS	0.000965	NS	NS	NS	NS	NS	NS	NS	NS	NS	NS	NS	NS	0.00704	NS	0.0047
40029	epigenetic regulation of gene expression (GO:0040029)	NS	NS	NS	NS	NS	0.00169	NS	NS	NS	NS	0.0079	NS	NS	NS	NS	NS	NS	NS	NS	NS	NS	NS	NS	NS	NS	NS	NS	NS	NS	NS
16310	phosphorylation (GO:0016310)	NS	NS	NS	NS	NS	NS	NS	NS	NS	NS	4.22e-05	0.00043	8.36e-11	1.38e-05	NS	NS	NS	NS	NS	NS	NS	NS	NS	NS	NS	NS	NS	7.87e-07	0.00156	NS
51094	positive regulation of developmental process (GO:0051094)	NS	NS	NS	NS	NS	NS	NS	NS	NS	NS	8.48e-07	8.16e-05	0.00377	3.15e-05	0.00118	NS	NS	NS	NS	NS	NS	NS	NS	NS	NS	0.000671	0.000696	0.00943	8.87e-05	0.0286
42274	ribosomal small subunit biogenesis (GO:0042274)	NS	NS	NS	NS	NS	NS	NS	NS	NS	NS	NS	NS	0.0106	NS	NS	NS	NS	NS	NS	NS	NS	NS	NS	NS	NS	NS	NS	NS	0.0377	0.0205
46217	indole phytoalexin metabolic process (GO:0046217)	NS	NS	NS	NS	NS	NS	NS	NS	NS	NS	NS	NS	0.00147	NS	NS	NS	NS	NS	NS	NS	NS	NS	NS	NS	NS	NS	NS	0.0181	NS	NS
72666	establishment of protein localization to vacuole (GO:0072666)	NS	NS	NS	NS	NS	NS	NS	NS	NS	NS	8.74e-05	0.0292	9.3e-05	0.00024	NS	NS	NS	NS	NS	NS	NS	NS	NS	NS	NS	NS	NS	NS	0.0313	NS
71383	cellular response to steroid hormone stimulus (GO:0071383)	NS	NS	NS	NS	NS	NS	NS	NS	NS	NS	0.00117	0.0217	0.00135	0.015	0.00109	NS	NS	NS	NS	NS	NS	NS	NS	NS	NS	0.0453	NS	NS	NS	0.0062
46520	sphingoid biosynthetic process (GO:0046520)	NS	NS	NS	NS	NS	NS	NS	NS	NS	NS	0.0142	0.0091	0.0139	0.00157	NS	NS	NS	NS	NS	NS	NS	NS	NS	NS	NS	NS	NS	NS	0.0026	NS
43069	negative regulation of programmed cell death (GO:0043069)	NS	NS	NS	NS	NS	NS	NS	NS	NS	NS	NS	0.0455	0.000113	NS	NS	NS	NS	NS	NS	NS	NS	NS	NS	NS	NS	NS	NS	0.0264	NS	NS
34440	lipid oxidation (GO:0034440)	NS	NS	NS	NS	NS	NS	NS	NS	NS	NS	NS	0.00644	0.00196	NS	NS	NS	NS	NS	NS	NS	NS	NS	NS	NS	NS	NS	NS	0.0134	NS	NS
2682	regulation of immune system process (GO:0002682)	NS	NS	NS	NS	NS	NS	NS	NS	NS	NS	0.000284	1.3e-05	7.72e-10	0.00169	NS	NS	NS	NS	NS	NS	NS	NS	NS	NS	NS	0.00129	0.00151	3.93e-05	0.028	NS
71369	cellular response to ethylene stimulus (GO:0071369)	NS	NS	NS	NS	NS	NS	NS	NS	NS	NS	NS	0.000114	1.22e-05	0.0168	NS	NS	NS	NS	NS	NS	NS	NS	NS	NS	NS	NS	0.0137	0.00462	NS	NS
32012	regulation of ARF protein signal transduction (GO:0032012)	NS	NS	NS	NS	NS	NS	NS	NS	NS	NS	0.000971	NS	NS	NS	NS	NS	NS	NS	NS	NS	NS	NS	NS	NS	NS	0.0266	NS	NS	NS	NS
1902347	response to strigolactone (GO:1902347)	NS	NS	NS	NS	NS	NS	NS	NS	NS	NS	NS	0.036	NS	NS	NS	NS	NS	NS	NS	NS	NS	NS	NS	NS	NS	NS	0.045	NS	NS	NS
1903008	organelle disassembly (GO:1903008)	NS	NS	NS	NS	NS	NS	NS	NS	NS	NS	6.53e-05	6.53e-05	1.72e-05	0.0102	NS	NS	NS	NS	NS	NS	NS	NS	NS	NS	NS	0.0117	0.0335	0.000504	NS	NS
30148	sphingolipid biosynthetic process (GO:0030148)	NS	NS	NS	NS	NS	NS	NS	NS	NS	NS	NS	0.0323	0.000487	NS	NS	NS	NS	NS	NS	NS	NS	NS	NS	NS	NS	NS	NS	0.04	NS	NS
1902531	regulation of intracellular signal transduction (GO:1902531)	NS	NS	NS	NS	NS	NS	NS	NS	NS	NS	0.000144	0.0468	NS	0.0076	0.043	NS	NS	NS	NS	NS	NS	NS	NS	NS	NS	0.0163	NS	NS	0.02	NS
22622	root system development (GO:0022622)	NS	NS	NS	NS	NS	NS	NS	NS	NS	NS	0.0011	NS	NS	NS	NS	NS	NS	NS	NS	NS	NS	NS	NS	NS	NS	NS	NS	0.0204	NS	NS
42436	indole-containing compound catabolic process (GO:0042436)	NS	NS	NS	NS	NS	NS	NS	NS	NS	NS	NS	0.00914	0.000194	NS	NS	NS	NS	NS	NS	NS	NS	NS	NS	NS	NS	NS	NS	0.0136	NS	NS
71367	cellular response to brassinosteroid stimulus (GO:0071367)	NS	NS	NS	NS	NS	NS	NS	NS	NS	NS	0.00245	0.0456	0.00277	0.0227	0.00173	NS	NS	NS	NS	NS	NS	NS	NS	NS	NS	NS	NS	NS	NS	0.0111
51253	negative regulation of RNA metabolic process (GO:0051253)	NS	NS	NS	NS	NS	NS	NS	NS	NS	NS	0.0187	NS	NS	NS	0.0312	NS	NS	NS	NS	NS	NS	NS	NS	NS	NS	0.0286	NS	NS	NS	NS
2000068	regulation of defense response to insect (GO:2000068)	NS	NS	NS	NS	NS	NS	NS	NS	NS	NS	NS	NS	0.00349	NS	NS	NS	NS	NS	NS	NS	NS	NS	NS	NS	NS	NS	NS	0.0248	NS	NS
2757	immune response-activating signaling pathway (GO:0002757)	NS	NS	NS	NS	NS	NS	NS	NS	NS	NS	2.64e-05	0.000159	1.4e-07	0.00561	NS	NS	NS	NS	NS	NS	NS	NS	NS	NS	NS	0.00185	0.0094	0.00171	NS	NS
18	regulation of DNA recombination (GO:0000018)	NS	NS	NS	NS	NS	NS	NS	NS	NS	NS	0.0183	NS	NS	NS	NS	NS	NS	NS	NS	NS	NS	NS	NS	NS	NS	0.0218	NS	NS	NS	NS
6665	sphingolipid metabolic process (GO:0006665)	NS	NS	NS	NS	NS	NS	NS	NS	NS	NS	0.00546	0.0065	1.8e-06	0.0233	NS	NS	NS	NS	NS	NS	NS	NS	NS	NS	NS	NS	NS	0.000704	NS	NS
10182	sugar mediated signaling pathway (GO:0010182)	NS	NS	NS	NS	NS	NS	NS	NS	NS	NS	0.0383	NS	NS	NS	NS	NS	NS	NS	NS	NS	NS	NS	NS	NS	NS	NS	0.0293	0.0342	0.0054	NS
3032	detection of oxygen (GO:0003032)	NS	NS	NS	NS	NS	NS	NS	NS	NS	NS	0.0258	NS	0.00188	0.006	0.0403	NS	NS	NS	NS	NS	NS	NS	NS	NS	NS	NS	NS	0.0254	0.0289	NS
43243	positive regulation of protein-containing complex disassembly (GO:0043243)	NS	NS	NS	NS	NS	NS	NS	NS	NS	NS	NS	NS	NS	NS	0.00209	NS	NS	NS	NS	NS	NS	NS	NS	NS	NS	NS	NS	NS	NS	0.0149
1902679	negative regulation of RNA biosynthetic process (GO:1902679)	NS	NS	NS	NS	NS	NS	NS	NS	NS	NS	0.0344	NS	NS	NS	0.0226	NS	NS	NS	NS	NS	NS	NS	NS	NS	NS	NS	NS	NS	NS	0.0381
60918	auxin transport (GO:0060918)	NS	NS	NS	NS	NS	NS	NS	NS	NS	NS	4.47e-07	6.58e-05	5.27e-05	0.00365	NS	NS	NS	NS	NS	NS	NS	NS	NS	NS	NS	0.000618	2.24e-05	6.01e-05	0.0193	NS
42538	hyperosmotic salinity response (GO:0042538)	NS	NS	NS	NS	NS	NS	NS	NS	NS	NS	NS	NS	NS	NS	NS	NS	NS	NS	0.0319	NS	NS	NS	NS	NS	NS	0.0164	NS	NS	NS	NS
5984	disaccharide metabolic process (GO:0005984)	NS	NS	NS	NS	NS	0.0123	0.00488	0.0328	NS	0.0284	NS	NS	NS	NS	NS	0.00104	NS	0.031	NS	NS	0.000634	0.000229	0.0097	0.0115	0.0221	0.00334	0.00495	0.0158	NS	0.0286
16052	carbohydrate catabolic process (GO:0016052)	NS	NS	NS	NS	NS	4.69e-06	0.039	3.83e-09	NS	6.45e-06	NS	NS	NS	NS	NS	0.00325	NS	0.0421	NS	NS	0.000194	NS	2.15e-06	NS	4.17e-05	0.0144	0.047	0.0098	NS	NS
9139	pyrimidine nucleoside diphosphate biosynthetic process (GO:0009139)	NS	NS	NS	NS	NS	NS	NS	NS	NS	NS	0.0263	NS	NS	NS	NS	NS	NS	NS	NS	NS	NS	NS	NS	NS	NS	0.0301	NS	NS	NS	NS
51247	positive regulation of protein metabolic process (GO:0051247)	NS	NS	NS	NS	NS	NS	NS	NS	NS	NS	NS	NS	NS	NS	NS	NS	NS	0.0385	NS	NS	NS	NS	NS	NS	NS	NS	NS	0.0343	NS	NS
7094	mitotic spindle assembly checkpoint signaling (GO:0007094)	NS	NS	NS	NS	NS	NS	NS	NS	NS	NS	NS	NS	NS	NS	NS	NS	NS	0.000425	NS	NS	NS	NS	NS	NS	NS	NS	NS	0.00286	NS	NS
9809	lignin biosynthetic process (GO:0009809)	NS	NS	NS	NS	NS	0.0112	NS	NS	NS	NS	NS	NS	NS	NS	NS	NS	NS	0.0413	0.00328	NS	NS	NS	NS	NS	NS	NS	NS	NS	NS	NS
7346	regulation of mitotic cell cycle (GO:0007346)	NS	NS	NS	NS	NS	NS	NS	NS	NS	NS	NS	NS	NS	NS	NS	NS	NS	0.000148	NS	NS	NS	NS	NS	NS	NS	NS	NS	0.0108	NS	NS
19220	regulation of phosphate metabolic process (GO:0019220)	NS	NS	NS	NS	NS	NS	NS	NS	NS	NS	NS	NS	NS	NS	NS	NS	NS	0.000327	0.0294	0.00904	NS	NS	NS	NS	NS	NS	NS	0.00217	NS	0.0364
10239	chloroplast mRNA processing (GO:0010239)	NS	NS	NS	NS	NS	NS	NS	NS	NS	NS	NS	NS	NS	NS	NS	NS	0.00543	0.000897	NS	NS	NS	NS	NS	NS	NS	NS	NS	0.034	NS	NS
42335	cuticle development (GO:0042335)	NS	NS	NS	NS	NS	NS	NS	NS	NS	NS	NS	NS	NS	NS	NS	0.0366	0.00315	0.000415	0.0181	NS	NS	NS	NS	NS	NS	NS	0.00143	0.00281	0.0376	NS
912	assembly of actomyosin apparatus involved in cytokinesis (GO:0000912)	NS	NS	NS	NS	NS	NS	NS	NS	NS	NS	NS	NS	NS	NS	NS	NS	NS	NS	NS	0.00607	NS	NS	NS	NS	NS	NS	NS	NS	NS	0.0441
7010	cytoskeleton organization (GO:0007010)	NS	NS	NS	NS	NS	NS	NS	NS	NS	NS	NS	NS	NS	NS	NS	0.00129	1.63e-05	2.06e-09	NS	3.46e-07	NS	NS	NS	NS	NS	NS	NS	0.00346	NS	0.00856
33478	UDP-rhamnose metabolic process (GO:0033478)	NS	NS	NS	NS	NS	NS	NS	NS	NS	NS	NS	NS	NS	NS	NS	NS	0.00235	0.00247	NS	NS	NS	NS	NS	NS	NS	NS	0.0194	0.0243	NS	NS
71174	mitotic spindle checkpoint signaling (GO:0071174)	NS	NS	NS	NS	NS	NS	NS	NS	NS	NS	NS	NS	NS	NS	NS	NS	NS	0.000414	NS	NS	NS	NS	NS	NS	NS	NS	NS	0.0028	NS	NS
16123	xanthophyll biosynthetic process (GO:0016123)	NS	NS	NS	NS	NS	0.0227	NS	NS	NS	NS	NS	NS	NS	NS	NS	0.0235	NS	0.00199	NS	NS	0.0174	NS	NS	NS	NS	NS	NS	0.0455	NS	NS
1901403	positive regulation of tetrapyrrole metabolic process (GO:1901403)	NS	NS	NS	NS	NS	NS	NS	NS	NS	NS	NS	NS	NS	NS	NS	NS	0.0213	0.0271	NS	NS	NS	NS	NS	NS	NS	NS	0.00555	0.0416	NS	NS
7389	pattern specification process (GO:0007389)	NS	NS	NS	NS	NS	NS	NS	NS	NS	NS	NS	NS	NS	NS	NS	NS	NS	1.68e-05	NS	NS	NS	NS	NS	NS	NS	NS	NS	0.0126	NS	NS
1902407	assembly of actomyosin apparatus involved in mitotic cytokinesis (GO:1902407)	NS	NS	NS	NS	NS	NS	NS	NS	NS	NS	NS	NS	NS	NS	NS	NS	NS	NS	NS	0.00617	NS	NS	NS	NS	NS	NS	NS	NS	NS	0.0444
9250	glucan biosynthetic process (GO:0009250)	NS	NS	NS	NS	NS	NS	NS	NS	NS	NS	NS	NS	NS	NS	NS	0.032	0.0113	0.00365	0.000839	0.0274	NS	NS	NS	NS	NS	NS	NS	NS	0.021	NS
6766	vitamin metabolic process (GO:0006766)	NS	NS	NS	NS	NS	NS	NS	NS	NS	NS	NS	NS	NS	NS	NS	9.83e-05	0.00924	0.00831	0.004	NS	NS	NS	NS	NS	NS	0.0172	NS	NS	NS	NS
46390	ribose phosphate biosynthetic process (GO:0046390)	NS	NS	NS	NS	NS	NS	NS	NS	NS	NS	NS	NS	NS	NS	NS	NS	0.00514	0.00105	NS	NS	NS	NS	NS	NS	NS	NS	NS	0.015	NS	NS
48285	organelle fission (GO:0048285)	NS	NS	NS	NS	NS	NS	NS	NS	NS	NS	NS	NS	NS	NS	NS	4.29e-08	7.35e-08	1.64e-13	0.000142	9.29e-10	NS	NS	NS	NS	NS	0.00214	0.000102	7.5e-06	NS	0.000657
48598	embryonic morphogenesis (GO:0048598)	NS	NS	NS	NS	NS	NS	NS	NS	NS	NS	NS	NS	NS	NS	NS	NS	NS	0.000424	NS	NS	NS	NS	NS	NS	NS	NS	NS	0.00719	NS	NS
51128	regulation of cellular component organization (GO:0051128)	NS	NS	NS	NS	NS	NS	NS	NS	NS	NS	NS	NS	NS	NS	NS	NS	NS	0.026	NS	NS	NS	NS	NS	NS	NS	NS	NS	0.0311	NS	NS
1901568	fatty acid derivative metabolic process (GO:1901568)	NS	NS	NS	NS	NS	NS	NS	NS	NS	0.0266	NS	NS	NS	NS	NS	0.00484	NS	0.00979	NS	NS	NS	NS	NS	NS	NS	0.0106	NS	0.00281	NS	NS
170033	L-amino acid metabolic process (GO:0170033)	NS	NS	NS	NS	NS	NS	NS	NS	NS	NS	NS	NS	NS	NS	NS	3.51e-07	0.0015	0.000154	7.17e-06	NS	NS	NS	NS	NS	NS	0.000117	0.00131	1.78e-05	6.12e-05	NS
45839	negative regulation of mitotic nuclear division (GO:0045839)	NS	NS	NS	NS	NS	NS	NS	NS	NS	NS	NS	NS	NS	NS	NS	NS	NS	0.0009	NS	NS	NS	NS	NS	NS	NS	NS	NS	0.00673	NS	NS
51246	regulation of protein metabolic process (GO:0051246)	NS	NS	NS	NS	NS	NS	NS	NS	NS	NS	NS	NS	NS	NS	NS	NS	NS	0.000594	NS	0.00749	NS	NS	NS	NS	NS	NS	NS	0.0114	NS	NS
46686	response to cadmium ion (GO:0046686)	NS	NS	NS	NS	NS	NS	NS	NS	NS	NS	NS	0.0219	0.0035	NS	NS	0.015	NS	0.0498	NS	NS	NS	NS	NS	NS	NS	0.0122	0.000239	1.58e-05	NS	NS
42743	hydrogen peroxide metabolic process (GO:0042743)	NS	NS	NS	NS	NS	NS	NS	NS	NS	NS	NS	NS	NS	NS	NS	0.00761	NS	0.0414	NS	NS	0.0302	NS	NS	NS	NS	NS	NS	NS	NS	NS
2181	cytoplasmic translation (GO:0002181)	NS	NS	NS	NS	NS	NS	NS	NS	NS	NS	NS	NS	NS	NS	NS	0.00232	0.00334	7.85e-08	0.000586	NS	NS	NS	NS	NS	NS	NS	NS	0.00643	NS	NS
71173	spindle assembly checkpoint signaling (GO:0071173)	NS	NS	NS	NS	NS	NS	NS	NS	NS	NS	NS	NS	NS	NS	NS	NS	NS	0.000412	NS	NS	NS	NS	NS	NS	NS	NS	NS	0.00279	NS	NS
34644	cellular response to UV (GO:0034644)	NS	NS	NS	NS	NS	0.0393	NS	NS	NS	NS	NS	NS	NS	NS	NS	0.0244	NS	0.0174	NS	NS	NS	NS	NS	NS	NS	NS	NS	NS	NS	NS
9066	aspartate family amino acid metabolic process (GO:0009066)	NS	NS	NS	NS	NS	NS	NS	NS	NS	NS	NS	NS	NS	NS	NS	0.0041	NS	0.0419	NS	NS	NS	NS	NS	NS	NS	0.0276	NS	0.00545	NS	NS
9112	nucleobase metabolic process (GO:0009112)	NS	NS	NS	NS	NS	NS	NS	NS	NS	NS	NS	NS	NS	NS	NS	NS	0.0302	0.0481	NS	NS	NS	NS	NS	NS	NS	NS	NS	0.0127	NS	NS
6972	hyperosmotic response (GO:0006972)	NS	NS	NS	NS	NS	NS	NS	NS	NS	NS	NS	NS	NS	NS	NS	NS	NS	NS	0.0315	NS	NS	NS	NS	NS	NS	0.0243	NS	NS	NS	NS
9668	plastid membrane organization (GO:0009668)	NS	NS	NS	NS	NS	NS	NS	NS	NS	NS	NS	NS	NS	NS	NS	0.000788	0.000149	0.000149	0.0433	NS	NS	NS	NS	NS	NS	NS	NS	0.0454	NS	NS
90558	plant epidermis development (GO:0090558)	NS	NS	NS	NS	NS	NS	NS	NS	NS	NS	NS	NS	NS	NS	NS	NS	NS	0.000321	NS	NS	NS	NS	NS	NS	NS	NS	NS	0.0334	NS	NS
51985	negative regulation of chromosome segregation (GO:0051985)	NS	NS	NS	NS	NS	NS	NS	NS	NS	NS	NS	NS	NS	NS	NS	NS	NS	0.000422	NS	NS	NS	NS	NS	NS	NS	NS	NS	0.00284	NS	NS
33047	regulation of mitotic sister chromatid segregation (GO:0033047)	NS	NS	NS	NS	NS	NS	NS	NS	NS	NS	NS	NS	NS	NS	NS	NS	NS	0.000903	NS	NS	NS	NS	NS	NS	NS	NS	NS	0.00678	NS	NS
70925	organelle assembly (GO:0070925)	NS	NS	NS	NS	NS	NS	NS	NS	NS	NS	NS	NS	NS	NS	NS	0.0464	NS	0.00431	NS	NS	NS	NS	NS	NS	NS	0.00664	NS	0.00565	NS	NS
1901661	quinone metabolic process (GO:1901661)	NS	NS	NS	NS	NS	NS	NS	NS	NS	NS	NS	NS	NS	NS	NS	3.73e-05	0.000206	0.000114	0.00784	NS	NS	NS	NS	NS	NS	0.0169	0.0046	0.0398	NS	NS
9225	nucleotide-sugar metabolic process (GO:0009225)	NS	NS	NS	NS	NS	NS	NS	NS	NS	NS	NS	NS	NS	NS	NS	0.0281	NS	0.00709	NS	NS	NS	NS	NS	NS	NS	NS	NS	0.0383	NS	NS
45841	negative regulation of mitotic metaphase/anaphase transition (GO:0045841)	NS	NS	NS	NS	NS	NS	NS	NS	NS	NS	NS	NS	NS	NS	NS	NS	NS	0.000409	NS	NS	NS	NS	NS	NS	NS	NS	NS	0.00277	NS	NS
51784	negative regulation of nuclear division (GO:0051784)	NS	NS	NS	NS	NS	NS	NS	NS	NS	NS	NS	NS	NS	NS	NS	NS	0.0412	3.99e-05	NS	NS	NS	NS	NS	NS	NS	NS	NS	0.00162	NS	NS
6417	regulation of translation (GO:0006417)	NS	NS	NS	NS	NS	NS	NS	NS	NS	NS	NS	NS	NS	NS	NS	NS	0.0385	0.00163	NS	NS	NS	NS	NS	NS	NS	NS	NS	0.00271	NS	NS
9067	aspartate family amino acid biosynthetic process (GO:0009067)	NS	NS	NS	NS	NS	NS	NS	NS	NS	NS	NS	NS	NS	NS	NS	0.00383	NS	0.0203	NS	NS	NS	NS	NS	NS	NS	NS	NS	0.025	NS	NS
34599	cellular response to oxidative stress (GO:0034599)	NS	NS	NS	NS	NS	NS	NS	NS	NS	NS	NS	NS	NS	NS	NS	7.86e-05	NS	NS	0.0125	0.0443	NS	NS	NS	NS	NS	0.00728	NS	NS	NS	NS
10025	wax biosynthetic process (GO:0010025)	NS	NS	NS	NS	NS	NS	NS	NS	NS	NS	NS	NS	NS	NS	NS	0.000192	NS	0.00062	NS	NS	NS	NS	NS	NS	NS	0.000601	NS	0.000506	NS	NS
9856	pollination (GO:0009856)	NS	NS	NS	NS	NS	NS	NS	NS	NS	NS	NS	NS	NS	NS	NS	0.0368	NS	0.0126	NS	NS	NS	NS	NS	NS	NS	0.04	0.0183	0.0405	NS	0.0445
10253	UDP-rhamnose biosynthetic process (GO:0010253)	NS	NS	NS	NS	NS	NS	NS	NS	NS	NS	NS	NS	NS	NS	NS	NS	0.00233	0.00246	NS	NS	NS	NS	NS	NS	NS	NS	0.0192	0.0242	NS	NS
16120	carotene biosynthetic process (GO:0016120)	NS	NS	NS	NS	NS	NS	NS	NS	NS	NS	NS	NS	NS	NS	NS	0.00116	NS	0.00086	NS	NS	NS	NS	NS	NS	NS	0.0266	NS	0.0222	NS	NS
34250	positive regulation of amide metabolic process (GO:0034250)	NS	NS	NS	NS	NS	NS	NS	NS	NS	NS	NS	NS	NS	NS	NS	NS	0.00736	0.0112	NS	NS	NS	NS	NS	NS	NS	NS	0.00172	0.0043	NS	NS
6544	glycine metabolic process (GO:0006544)	NS	NS	NS	NS	NS	NS	NS	NS	NS	NS	NS	NS	NS	NS	NS	0.0014	0.00359	0.000944	0.000426	NS	NS	NS	NS	NS	NS	0.0262	0.0402	0.0215	0.00733	NS
9888	tissue development (GO:0009888)	NS	NS	NS	NS	NS	NS	NS	NS	NS	NS	NS	NS	NS	NS	NS	NS	NS	3.68e-05	NS	NS	NS	NS	NS	NS	NS	NS	NS	0.00142	NS	NS
44706	multi-multicellular organism process (GO:0044706)	NS	NS	NS	NS	NS	NS	NS	NS	NS	NS	NS	NS	NS	NS	NS	0.0369	NS	0.0126	NS	NS	NS	NS	NS	NS	NS	0.0401	0.0184	0.0406	NS	0.0447
30705	cytoskeleton-dependent intracellular transport (GO:0030705)	NS	NS	NS	NS	NS	NS	NS	NS	NS	NS	NS	NS	NS	NS	NS	NS	NS	0.0176	NS	NS	NS	NS	NS	NS	NS	NS	NS	0.0459	NS	NS
10166	wax metabolic process (GO:0010166)	NS	NS	NS	NS	NS	NS	NS	NS	NS	NS	NS	NS	NS	NS	NS	0.000289	NS	0.000891	NS	NS	NS	NS	NS	NS	NS	0.000974	NS	0.000837	NS	NS
9965	leaf morphogenesis (GO:0009965)	NS	NS	NS	NS	NS	NS	NS	NS	NS	NS	NS	NS	NS	NS	NS	0.012	NS	0.000195	NS	NS	NS	NS	NS	NS	NS	NS	NS	0.00761	NS	NS
9069	serine family amino acid metabolic process (GO:0009069)	NS	NS	NS	NS	NS	NS	NS	NS	NS	NS	NS	NS	NS	NS	NS	0.000176	0.000124	0.000389	7.83e-09	NS	NS	NS	NS	NS	NS	0.0142	0.00788	0.00627	6.92e-06	NS
32790	ribosome disassembly (GO:0032790)	NS	NS	NS	NS	NS	NS	NS	NS	NS	NS	NS	NS	NS	NS	NS	NS	NS	0.0187	NS	NS	NS	NS	NS	NS	NS	0.0298	NS	0.00542	NS	NS
6011	UDP-glucose metabolic process (GO:0006011)	NS	NS	NS	NS	NS	NS	NS	NS	NS	NS	NS	NS	NS	NS	NS	0.0284	NS	0.0211	NS	NS	NS	NS	NS	NS	NS	NS	NS	0.0256	NS	NS
6366	transcription by RNA polymerase II (GO:0006366)	NS	NS	NS	NS	NS	NS	NS	NS	NS	NS	NS	NS	NS	NS	NS	NS	NS	0.00773	NS	NS	NS	NS	NS	NS	NS	NS	NS	0.0087	NS	NS
3002	regionalization (GO:0003002)	NS	NS	NS	NS	NS	NS	NS	NS	NS	NS	NS	NS	NS	NS	NS	NS	0.0495	3.96e-07	NS	NS	NS	NS	NS	NS	NS	NS	NS	0.00682	NS	NS
7097	nuclear migration (GO:0007097)	NS	NS	NS	NS	NS	NS	NS	NS	NS	NS	NS	NS	NS	NS	NS	NS	NS	0.0399	NS	NS	NS	NS	NS	NS	NS	0.01	0.00562	NS	NS	NS
42761	very long-chain fatty acid biosynthetic process (GO:0042761)	NS	NS	NS	NS	NS	NS	NS	NS	NS	NS	NS	NS	NS	NS	NS	0.000662	NS	0.00793	NS	NS	NS	NS	NS	NS	NS	0.0501	NS	NS	NS	NS
6546	glycine catabolic process (GO:0006546)	NS	NS	NS	NS	NS	NS	NS	NS	NS	NS	NS	NS	NS	NS	NS	0.00117	0.000657	4.68e-05	2.2e-05	NS	NS	NS	NS	NS	NS	0.0267	0.0155	0.00275	0.00125	NS
280	nuclear division (GO:0000280)	NS	NS	NS	NS	NS	NS	NS	NS	NS	NS	NS	NS	NS	NS	NS	4.23e-05	0.000286	2.41e-09	0.000294	2.36e-09	NS	NS	NS	NS	NS	0.0394	NS	0.00159	NS	0.000821
51276	chromosome organization (GO:0051276)	NS	NS	NS	NS	NS	NS	NS	NS	NS	NS	NS	NS	NS	NS	NS	0.0106	3.84e-05	2.04e-08	0.00723	5.19e-05	NS	NS	NS	NS	NS	NS	0.012	0.00237	NS	0.00916
10016	shoot system morphogenesis (GO:0010016)	NS	NS	NS	NS	NS	NS	NS	NS	NS	NS	NS	NS	NS	NS	NS	0.00748	NS	2.74e-06	NS	NS	NS	NS	NS	NS	NS	0.0299	NS	0.0039	NS	NS
2000896	amylopectin metabolic process (GO:2000896)	NS	NS	NS	NS	NS	NS	NS	NS	NS	NS	NS	NS	NS	NS	NS	0.00593	0.00365	0.00437	NS	0.00359	NS	NS	NS	NS	NS	NS	0.0454	NS	NS	0.0279
1901570	fatty acid derivative biosynthetic process (GO:1901570)	NS	NS	NS	NS	NS	NS	NS	NS	NS	NS	NS	NS	NS	NS	NS	0.000861	NS	0.00224	NS	NS	NS	NS	NS	NS	NS	0.00112	NS	0.00327	NS	NS
819	sister chromatid segregation (GO:0000819)	NS	NS	NS	NS	NS	NS	NS	NS	NS	NS	NS	NS	NS	NS	NS	7.54e-06	2.5e-08	1.3e-07	0.000124	4.14e-07	NS	NS	NS	NS	NS	0.0035	4e-05	0.000245	0.0201	0.000578
106049	regulation of cellular response to osmotic stress (GO:0106049)	NS	NS	NS	NS	NS	NS	NS	NS	NS	NS	NS	NS	NS	NS	NS	NS	NS	0.0467	NS	0.00901	NS	NS	NS	NS	NS	NS	NS	NS	NS	0.0403
99515	actin filament-based transport (GO:0099515)	NS	NS	NS	NS	NS	NS	NS	NS	NS	NS	NS	NS	NS	NS	NS	NS	NS	0.0075	NS	NS	NS	NS	NS	NS	NS	0.0405	0.0218	0.00677	NS	NS
140014	mitotic nuclear division (GO:0140014)	NS	NS	NS	NS	NS	NS	NS	NS	NS	NS	NS	NS	NS	NS	NS	0.000257	2.15e-06	1.89e-06	0.00041	1.48e-05	NS	NS	NS	NS	NS	0.0268	0.000155	0.00106	0.0223	0.00815
1905819	negative regulation of chromosome separation (GO:1905819)	NS	NS	NS	NS	NS	NS	NS	NS	NS	NS	NS	NS	NS	NS	NS	NS	NS	0.000406	NS	NS	NS	NS	NS	NS	NS	NS	NS	0.00276	NS	NS
80155	regulation of double fertilization forming a zygote and endosperm (GO:0080155)	NS	NS	NS	NS	NS	NS	NS	NS	NS	NS	NS	NS	NS	NS	NS	0.0207	NS	0.0245	NS	NS	NS	NS	NS	NS	NS	0.00294	0.0425	0.000396	NS	NS
10154	fruit development (GO:0010154)	NS	NS	NS	NS	NS	NS	NS	NS	NS	NS	NS	NS	NS	NS	NS	NS	0.036	3.64e-05	NS	NS	NS	NS	NS	NS	NS	NS	NS	0.0309	NS	NS
48564	photosystem I assembly (GO:0048564)	NS	NS	NS	NS	NS	NS	NS	NS	NS	NS	NS	NS	NS	NS	NS	0.000361	0.00094	0.00795	0.0313	NS	NS	NS	NS	NS	NS	0.0402	NS	NS	NS	NS
9718	anthocyanin-containing compound biosynthetic process (GO:0009718)	NS	NS	NS	NS	NS	NS	NS	NS	NS	NS	NS	NS	NS	NS	NS	0.0436	0.00508	3.55e-05	0.000609	2.3e-05	NS	NS	NS	NS	NS	NS	NS	7.12e-06	0.00219	0.000336
6414	translational elongation (GO:0006414)	NS	NS	NS	NS	NS	NS	NS	NS	NS	NS	NS	NS	NS	NS	NS	8.11e-05	NS	3.24e-07	NS	NS	NS	NS	NS	NS	NS	0.00482	NS	4.26e-06	NS	NS
42273	ribosomal large subunit biogenesis (GO:0042273)	NS	NS	NS	NS	NS	NS	NS	NS	NS	NS	NS	NS	0.0141	NS	NS	0.00963	NS	0.00193	NS	NS	NS	NS	NS	NS	NS	NS	NS	NS	NS	NS
8652	amino acid biosynthetic process (GO:0008652)	NS	NS	NS	NS	NS	NS	NS	NS	NS	NS	NS	NS	NS	NS	NS	0.0002	NS	0.0411	0.0151	NS	NS	NS	NS	NS	NS	0.0107	NS	NS	NS	NS
10236	plastoquinone biosynthetic process (GO:0010236)	NS	NS	NS	NS	NS	NS	NS	NS	NS	NS	NS	NS	NS	NS	NS	0.00589	0.000208	0.000292	0.00435	NS	NS	NS	NS	NS	NS	0.00997	0.000286	0.000557	0.00629	NS
51338	regulation of transferase activity (GO:0051338)	NS	NS	NS	NS	NS	NS	NS	NS	NS	NS	NS	NS	NS	NS	NS	NS	0.0179	0.000352	NS	0.000423	NS	NS	NS	NS	NS	NS	NS	0.0307	NS	0.00555
30163	protein catabolic process (GO:0030163)	NS	NS	NS	NS	NS	NS	NS	NS	NS	NS	0.00102	6.15e-05	0.00106	0.0038	NS	0.0319	NS	0.00923	NS	NS	NS	NS	NS	NS	NS	NS	NS	NS	NS	NS
51052	regulation of DNA metabolic process (GO:0051052)	NS	NS	NS	NS	NS	NS	NS	NS	NS	NS	NS	NS	NS	NS	NS	NS	0.00364	0.0288	NS	NS	NS	NS	NS	NS	NS	NS	0.00393	NS	NS	NS
79	regulation of cyclin-dependent protein serine/threonine kinase activity (GO:0000079)	NS	NS	NS	NS	NS	NS	NS	NS	NS	NS	NS	NS	NS	NS	NS	NS	0.00268	1.69e-05	NS	5.99e-05	NS	NS	NS	NS	NS	NS	NS	0.00504	NS	0.00299
141067	intracellular nitrogen homeostasis (GO:0141067)	NS	NS	NS	NS	NS	NS	NS	NS	NS	NS	NS	NS	NS	NS	NS	0.0285	NS	0.0213	NS	NS	NS	NS	NS	NS	NS	NS	NS	NS	NS	NS
48608	reproductive structure development (GO:0048608)	NS	NS	NS	NS	NS	NS	NS	NS	NS	NS	NS	NS	NS	NS	NS	NS	NS	3.57e-05	NS	NS	NS	NS	NS	NS	NS	0.00684	NS	0.0135	NS	NS
1932	regulation of protein phosphorylation (GO:0001932)	NS	NS	NS	NS	NS	NS	NS	NS	NS	NS	NS	NS	NS	NS	NS	0.0238	0.0212	1.22e-05	0.0163	0.000256	NS	NS	NS	NS	NS	NS	NS	0.00246	NS	0.0186
19676	ammonia assimilation cycle (GO:0019676)	NS	NS	NS	NS	NS	NS	NS	NS	NS	NS	NS	NS	NS	NS	NS	0.0283	NS	0.021	NS	NS	NS	NS	NS	NS	NS	NS	NS	NS	NS	NS
120255	olefinic compound biosynthetic process (GO:0120255)	NS	NS	NS	NS	NS	NS	NS	NS	NS	NS	NS	NS	NS	NS	NS	NS	NS	NS	0.0415	NS	NS	NS	NS	NS	NS	0.0343	NS	NS	NS	NS
9070	serine family amino acid biosynthetic process (GO:0009070)	NS	NS	NS	NS	NS	NS	NS	NS	NS	NS	NS	NS	NS	NS	NS	0.00759	0.00824	0.0414	2.2e-05	NS	NS	NS	NS	NS	NS	NS	NS	NS	0.00208	NS
51653	spindle localization (GO:0051653)	NS	NS	NS	NS	NS	NS	NS	NS	NS	NS	NS	NS	NS	NS	NS	NS	0.0461	0.0468	0.00992	0.00908	NS	NS	NS	NS	NS	NS	NS	NS	NS	0.0407
51293	establishment of spindle localization (GO:0051293)	NS	NS	NS	NS	NS	NS	NS	NS	NS	NS	NS	NS	NS	NS	NS	NS	0.0457	0.0465	0.00988	0.00888	NS	NS	NS	NS	NS	NS	NS	NS	NS	0.04
10103	stomatal complex morphogenesis (GO:0010103)	NS	NS	NS	NS	NS	NS	NS	NS	NS	NS	NS	NS	NS	NS	NS	0.0241	NS	0.0166	NS	NS	NS	NS	NS	NS	NS	NS	NS	NS	NS	NS
10564	regulation of cell cycle process (GO:0010564)	NS	NS	NS	NS	NS	NS	NS	NS	NS	NS	NS	NS	NS	NS	NS	NS	0.00127	6.58e-09	0.0239	0.00432	NS	NS	NS	NS	NS	NS	NS	0.00109	NS	NS
9955	adaxial/abaxial pattern specification (GO:0009955)	NS	NS	NS	NS	NS	NS	NS	NS	NS	NS	NS	NS	NS	NS	NS	0.0357	NS	0.0241	NS	NS	NS	NS	NS	NS	NS	NS	NS	NS	NS	NS
48532	anatomical structure arrangement (GO:0048532)	NS	NS	NS	NS	NS	NS	NS	NS	NS	NS	NS	NS	NS	NS	NS	NS	NS	0.00518	NS	NS	NS	NS	NS	NS	NS	NS	NS	0.0286	NS	NS
98813	nuclear chromosome segregation (GO:0098813)	NS	NS	NS	NS	NS	NS	NS	NS	NS	NS	NS	NS	NS	NS	NS	9.78e-05	1.13e-05	9.06e-08	0.000305	3.17e-07	NS	NS	NS	NS	NS	NS	0.0235	0.00386	NS	0.0028
51644	plastid localization (GO:0051644)	NS	NS	NS	NS	NS	NS	NS	NS	NS	NS	NS	NS	NS	NS	NS	NS	0.0115	0.00189	NS	NS	NS	NS	NS	NS	NS	NS	NS	0.0401	NS	NS
1902410	mitotic cytokinetic process (GO:1902410)	NS	NS	NS	NS	NS	NS	NS	NS	NS	NS	NS	NS	NS	NS	NS	NS	NS	NS	NS	0.00623	NS	NS	NS	NS	NS	NS	NS	NS	NS	0.0445
5977	glycogen metabolic process (GO:0005977)	NS	NS	NS	NS	NS	NS	NS	NS	NS	NS	NS	NS	NS	NS	NS	2.05e-06	0.000104	0.00136	0.00129	NS	NS	NS	NS	NS	NS	0.000817	0.0104	NS	NS	NS
42255	ribosome assembly (GO:0042255)	NS	NS	NS	NS	NS	NS	NS	NS	NS	NS	NS	NS	NS	NS	NS	0.000778	NS	0.00367	NS	NS	NS	NS	NS	NS	NS	NS	NS	NS	NS	NS
1903047	mitotic cell cycle process (GO:1903047)	NS	NS	NS	NS	NS	NS	NS	NS	NS	NS	NS	NS	NS	NS	NS	4.84e-08	1.27e-13	1.29e-22	7.19e-10	5.17e-17	NS	NS	NS	NS	NS	0.00227	2.89e-06	1.23e-10	0.000855	3.08e-08
19740	nitrogen utilization (GO:0019740)	NS	NS	NS	NS	NS	NS	NS	NS	NS	NS	NS	NS	NS	NS	NS	0.0283	NS	0.0211	NS	NS	NS	NS	NS	NS	NS	NS	NS	NS	NS	NS
75	cell cycle checkpoint signaling (GO:0000075)	NS	NS	NS	NS	NS	NS	NS	NS	NS	NS	NS	NS	NS	NS	NS	NS	NS	7.21e-06	NS	NS	NS	NS	NS	NS	NS	NS	NS	0.0128	NS	NS
1901137	carbohydrate derivative biosynthetic process (GO:1901137)	NS	NS	NS	NS	NS	NS	NS	NS	NS	NS	NS	NS	NS	NS	NS	0.00207	0.00165	0.0042	0.000259	NS	NS	NS	NS	NS	NS	NS	NS	0.0208	0.00592	NS
6268	DNA unwinding involved in DNA replication (GO:0006268)	NS	NS	NS	NS	NS	NS	NS	NS	NS	NS	NS	NS	NS	NS	NS	0.0257	0.000251	0.000416	NS	0.0364	NS	NS	NS	NS	NS	NS	0.0154	0.0054	NS	NS
30261	chromosome condensation (GO:0030261)	NS	NS	NS	NS	NS	NS	NS	NS	NS	NS	NS	NS	NS	NS	NS	0.0437	NS	0.0322	0.00509	0.00295	NS	NS	NS	NS	NS	0.000544	0.0179	0.00961	0.0106	0.00224
10021	amylopectin biosynthetic process (GO:0010021)	NS	NS	NS	NS	NS	NS	NS	NS	NS	NS	NS	NS	NS	NS	NS	0.00594	0.00367	0.00438	NS	0.00362	NS	NS	NS	NS	NS	NS	0.0455	NS	NS	0.028
6553	lysine metabolic process (GO:0006553)	NS	NS	NS	NS	NS	NS	NS	NS	NS	NS	NS	NS	NS	NS	NS	0.000981	0.00222	0.000648	0.0465	NS	NS	NS	NS	NS	NS	0.0286	0.0386	0.00705	NS	NS
30522	intracellular receptor signaling pathway (GO:0030522)	NS	NS	NS	NS	NS	NS	NS	NS	NS	NS	NS	NS	NS	NS	NS	NS	NS	NS	NS	0.0382	NS	NS	NS	NS	NS	0.0036	0.0181	0.0344	0.0267	0.00629
51726	regulation of cell cycle (GO:0051726)	NS	NS	NS	NS	NS	NS	NS	NS	NS	NS	NS	NS	NS	NS	NS	NS	6e-05	1.4e-11	0.00567	3.91e-06	NS	NS	NS	NS	NS	NS	NS	5.41e-05	NS	0.0021
7093	mitotic cell cycle checkpoint signaling (GO:0007093)	NS	NS	NS	NS	NS	NS	NS	NS	NS	NS	NS	NS	NS	NS	NS	NS	NS	0.000294	NS	NS	NS	NS	NS	NS	NS	NS	NS	0.0373	NS	NS
1902099	regulation of metaphase/anaphase transition of cell cycle (GO:1902099)	NS	NS	NS	NS	NS	NS	NS	NS	NS	NS	NS	NS	NS	NS	NS	NS	NS	0.00793	NS	NS	NS	NS	NS	NS	NS	NS	NS	0.033	NS	NS
9769	photosynthesis, light harvesting in photosystem II (GO:0009769)	NS	NS	NS	NS	NS	0.00371	NS	NS	NS	NS	NS	NS	NS	NS	NS	0.00557	0.000277	NS	NS	NS	0.0283	NS	NS	NS	NS	NS	0.0115	NS	NS	NS
1901401	regulation of tetrapyrrole metabolic process (GO:1901401)	NS	NS	NS	NS	NS	NS	NS	NS	NS	NS	NS	NS	NS	NS	NS	0.00161	1.99e-05	5.53e-05	NS	0.00227	NS	NS	NS	NS	NS	1.07e-05	6.85e-06	3.97e-05	0.0495	0.000511
9704	de-etiolation (GO:0009704)	NS	NS	NS	NS	NS	NS	NS	NS	NS	NS	NS	NS	NS	NS	NS	0.00746	0.0176	0.024	0.025	NS	NS	NS	NS	NS	NS	0.0262	NS	NS	0.0316	NS
31647	regulation of protein stability (GO:0031647)	NS	NS	NS	NS	NS	NS	NS	NS	NS	NS	NS	NS	NS	NS	NS	0.00103	0.0419	0.0241	NS	0.0179	NS	NS	NS	NS	NS	0.00388	NS	NS	NS	NS
9645	response to low light intensity stimulus (GO:0009645)	NS	NS	NS	NS	NS	2.51e-05	NS	NS	NS	NS	NS	NS	NS	NS	NS	0.00222	0.000935	NS	NS	NS	0.00115	NS	NS	NS	NS	0.00273	0.00463	NS	NS	NS
51640	organelle localization (GO:0051640)	NS	NS	NS	NS	NS	NS	NS	NS	NS	NS	NS	NS	NS	NS	NS	NS	NS	NS	NS	0.0111	NS	NS	NS	NS	NS	NS	NS	0.00786	NS	NS
9145	purine nucleoside triphosphate biosynthetic process (GO:0009145)	NS	NS	NS	NS	NS	NS	NS	NS	NS	NS	NS	NS	NS	NS	NS	0.0333	0.00391	NS	NS	NS	NS	NS	NS	NS	NS	NS	NS	NS	NS	NS
80183	response to photooxidative stress (GO:0080183)	NS	NS	NS	NS	NS	NS	NS	NS	NS	NS	NS	NS	NS	NS	NS	NS	NS	NS	NS	0.0362	NS	NS	NS	NS	NS	0.0297	NS	0.00539	NS	NS
9933	meristem structural organization (GO:0009933)	NS	NS	NS	NS	NS	NS	NS	NS	NS	NS	NS	NS	NS	NS	NS	NS	NS	0.0121	NS	NS	NS	NS	NS	NS	NS	NS	NS	0.0186	NS	NS
9142	nucleoside triphosphate biosynthetic process (GO:0009142)	NS	NS	NS	NS	NS	NS	NS	NS	NS	NS	NS	NS	NS	NS	NS	0.032	0.00644	NS	NS	NS	NS	NS	NS	NS	NS	NS	0.0268	NS	NS	NS
1902850	microtubule cytoskeleton organization involved in mitosis (GO:1902850)	NS	NS	NS	NS	NS	NS	NS	NS	NS	NS	NS	NS	NS	NS	NS	0.00934	0.000179	8.36e-05	0.000497	0.000165	NS	NS	NS	NS	NS	NS	NS	NS	NS	0.0184
44248	cellular catabolic process (GO:0044248)	0.00181	0.0193	NS	NS	NS	0.00098	NS	0.0019	NS	6.75e-05	1.49e-07	6.5e-11	1.72e-10	3.31e-08	7.91e-06	0.0171	NS	NS	9.17e-05	NS	4.4e-08	0.00655	1.12e-05	NS	0.000146	1.08e-10	9.5e-10	1.73e-10	7.96e-14	4.9e-06
9251	glucan catabolic process (GO:0009251)	NS	NS	NS	NS	NS	0.0189	NS	NS	NS	NS	NS	NS	NS	NS	NS	2.19e-05	0.0177	NS	NS	NS	NS	NS	NS	NS	NS	6.97e-05	0.0165	NS	NS	NS
6515	protein quality control for misfolded or incompletely synthesized proteins (GO:0006515)	NS	NS	NS	NS	NS	NS	NS	NS	NS	NS	NS	NS	NS	NS	NS	0.0337	0.0177	NS	NS	NS	NS	NS	NS	NS	NS	NS	0.0401	NS	NS	NS
51656	establishment of organelle localization (GO:0051656)	NS	NS	NS	NS	NS	NS	NS	NS	NS	NS	NS	NS	NS	NS	NS	NS	0.00367	0.00237	NS	5.64e-05	NS	NS	NS	NS	NS	NS	NS	NS	NS	0.024
6357	regulation of transcription by RNA polymerase II (GO:0006357)	NS	NS	NS	NS	NS	NS	NS	NS	NS	NS	NS	NS	NS	NS	NS	0.004	0.0227	NS	NS	NS	NS	NS	NS	NS	NS	0.0275	0.0352	0.031	NS	NS
9126	purine nucleoside monophosphate metabolic process (GO:0009126)	NS	NS	NS	NS	NS	NS	NS	NS	NS	NS	NS	NS	NS	NS	NS	0.0238	0.0377	NS	NS	NS	NS	NS	NS	NS	NS	NS	NS	NS	NS	NS
80022	primary root development (GO:0080022)	NS	NS	NS	NS	NS	NS	NS	NS	NS	NS	NS	NS	NS	NS	NS	NS	NS	0.024	0.0364	NS	NS	NS	NS	NS	NS	NS	NS	0.0035	NS	NS
18130	heterocycle biosynthetic process (GO:0018130)	NS	NS	NS	NS	NS	NS	NS	NS	NS	NS	NS	NS	NS	NS	NS	3.18e-09	1.16e-08	2.11e-10	0.0002	0.00415	NS	NS	NS	NS	NS	1.66e-06	0.00113	8.1e-07	NS	NS
31539	positive regulation of anthocyanin metabolic process (GO:0031539)	NS	NS	NS	NS	NS	NS	NS	NS	NS	NS	NS	NS	NS	NS	NS	NS	NS	0.021	NS	NS	NS	NS	NS	NS	NS	NS	NS	0.0254	NS	NS
9127	purine nucleoside monophosphate biosynthetic process (GO:0009127)	NS	NS	NS	NS	NS	NS	NS	NS	NS	NS	NS	NS	NS	NS	NS	0.0239	0.0378	NS	NS	NS	NS	NS	NS	NS	NS	NS	NS	NS	NS	NS
48316	seed development (GO:0048316)	NS	NS	NS	NS	NS	NS	NS	NS	NS	NS	NS	NS	NS	NS	NS	NS	NS	2.54e-05	NS	NS	NS	NS	NS	NS	NS	NS	NS	0.0243	NS	NS
10148	transpiration (GO:0010148)	NS	NS	NS	NS	NS	NS	NS	NS	NS	NS	NS	NS	NS	NS	NS	NS	NS	0.0209	NS	NS	NS	NS	NS	NS	NS	NS	NS	0.0253	NS	NS
9167	purine ribonucleoside monophosphate metabolic process (GO:0009167)	NS	NS	NS	NS	NS	NS	NS	NS	NS	NS	NS	NS	NS	NS	NS	0.0239	0.0379	NS	NS	NS	NS	NS	NS	NS	NS	NS	NS	NS	NS	NS
9168	purine ribonucleoside monophosphate biosynthetic process (GO:0009168)	NS	NS	NS	NS	NS	NS	NS	NS	NS	NS	NS	NS	NS	NS	NS	0.024	0.038	NS	NS	NS	NS	NS	NS	NS	NS	NS	NS	NS	NS	NS
61640	cytoskeleton-dependent cytokinesis (GO:0061640)	NS	NS	NS	NS	NS	NS	NS	NS	NS	NS	NS	NS	NS	NS	NS	NS	0.0152	0.000471	0.00777	0.000505	NS	NS	NS	NS	NS	NS	NS	0.0186	NS	0.0116
50832	defense response to fungus (GO:0050832)	0.0483	2.01e-07	NS	NS	NS	0.00158	NS	NS	NS	NS	3.56e-05	1.63e-10	1.05e-13	0.0011	0.0407	NS	NS	NS	NS	NS	3.8e-06	2.19e-07	0.0085	NS	NS	5.33e-07	1.12e-09	3.1e-09	0.000269	0.0376
33046	negative regulation of sister chromatid segregation (GO:0033046)	NS	NS	NS	NS	NS	NS	NS	NS	NS	NS	NS	NS	NS	NS	NS	NS	NS	0.000417	NS	NS	NS	NS	NS	NS	NS	NS	NS	0.00282	NS	NS
2001251	negative regulation of chromosome organization (GO:2001251)	NS	NS	NS	NS	NS	NS	NS	NS	NS	NS	NS	NS	NS	NS	NS	NS	NS	0.000196	NS	NS	NS	NS	NS	NS	NS	NS	NS	0.00251	NS	NS
44772	mitotic cell cycle phase transition (GO:0044772)	NS	NS	NS	NS	NS	NS	NS	NS	NS	NS	NS	NS	NS	NS	NS	NS	0.00238	6.75e-06	NS	0.000496	NS	NS	NS	NS	NS	NS	NS	0.0132	NS	0.0217
9071	serine family amino acid catabolic process (GO:0009071)	NS	NS	NS	NS	NS	NS	NS	NS	NS	NS	NS	NS	NS	NS	NS	0.00561	0.00316	0.00042	0.000108	NS	NS	NS	NS	NS	NS	NS	0.0116	0.00283	0.00582	NS
44770	cell cycle phase transition (GO:0044770)	NS	NS	NS	NS	NS	NS	NS	NS	NS	NS	NS	NS	NS	NS	NS	NS	0.00292	1.9e-06	NS	0.000571	NS	NS	NS	NS	NS	NS	NS	0.00766	NS	0.0249
99518	vesicle cytoskeletal trafficking (GO:0099518)	NS	NS	NS	NS	NS	NS	NS	NS	NS	NS	NS	NS	NS	NS	NS	NS	NS	0.00948	NS	NS	NS	NS	NS	NS	NS	NS	NS	0.0222	NS	0.0439
281	mitotic cytokinesis (GO:0000281)	NS	NS	NS	NS	NS	NS	NS	NS	NS	NS	NS	NS	NS	NS	NS	0.0281	0.0101	0.00195	0.0163	0.000232	NS	NS	NS	NS	NS	NS	NS	NS	NS	0.0108
14070	response to organic cyclic compound (GO:0014070)	0.00215	0.00183	NS	NS	NS	0.0227	NS	NS	NS	NS	2.05e-08	8.97e-12	1.96e-17	8.23e-08	4.56e-08	NS	NS	NS	NS	NS	7.6e-06	0.0134	NS	NS	NS	1.23e-07	8.21e-10	1.43e-10	4.04e-07	2.53e-07
2376	immune system process (GO:0002376)	0.0325	0.000223	NS	NS	NS	NS	NS	NS	NS	NS	2.36e-06	6.16e-05	7.28e-08	0.00194	NS	NS	NS	NS	NS	NS	0.000737	0.0118	NS	NS	NS	0.00218	0.025	0.00457	NS	NS
1901607	alpha-amino acid biosynthetic process (GO:1901607)	NS	NS	NS	NS	NS	NS	NS	NS	NS	NS	NS	NS	NS	NS	NS	3e-06	0.00379	0.00235	6.76e-05	NS	NS	NS	NS	NS	NS	0.000788	NS	0.00651	0.0171	NS
43447	alkane biosynthetic process (GO:0043447)	NS	NS	NS	NS	NS	NS	NS	NS	NS	NS	NS	NS	NS	NS	NS	NS	NS	0.0463	NS	NS	NS	NS	NS	NS	NS	0.0285	NS	0.0242	NS	NS
70	mitotic sister chromatid segregation (GO:0000070)	NS	NS	NS	NS	NS	NS	NS	NS	NS	NS	NS	NS	NS	NS	NS	3.77e-05	1.62e-07	7.87e-07	0.000276	1.1e-06	NS	NS	NS	NS	NS	0.00701	9.56e-05	0.000508	0.0259	0.000882
36294	cellular response to decreased oxygen levels (GO:0036294)	9.87e-15	2.18e-25	2.2e-17	4.19e-07	3.4e-07	2.23e-23	NS	1.75e-05	0.011	0.016	7.08e-10	4.92e-28	9.33e-34	1.36e-12	4.7e-13	0.0367	NS	NS	NS	NS	8.67e-44	3.18e-21	1.55e-23	2.82e-10	1.23e-09	1.46e-12	2.17e-16	3.92e-17	3.24e-09	2.38e-10
35556	intracellular signal transduction (GO:0035556)	NS	NS	NS	NS	NS	NS	NS	NS	NS	NS	NS	NS	NS	NS	NS	NS	NS	0.0345	NS	NS	NS	NS	NS	NS	NS	NS	NS	0.000982	NS	NS
1902326	positive regulation of chlorophyll biosynthetic process (GO:1902326)	NS	NS	NS	NS	NS	NS	NS	NS	NS	NS	NS	NS	NS	NS	NS	NS	0.0357	0.0421	NS	NS	NS	NS	NS	NS	NS	NS	0.0217	NS	NS	NS
43549	regulation of kinase activity (GO:0043549)	NS	NS	NS	NS	NS	NS	NS	NS	NS	NS	NS	NS	NS	NS	NS	NS	0.00421	3.66e-05	NS	8.96e-05	NS	NS	NS	NS	NS	NS	NS	0.0076	NS	0.00478
10014	meristem initiation (GO:0010014)	NS	NS	NS	NS	NS	NS	NS	NS	NS	NS	NS	NS	NS	NS	NS	NS	NS	0.0455	NS	NS	NS	NS	NS	NS	NS	NS	NS	0.0344	NS	NS
71456	cellular response to hypoxia (GO:0071456)	9.4e-15	2.32e-25	3.98e-17	4.61e-07	3.31e-07	1.48e-23	NS	1.6e-05	0.0104	0.0152	6.03e-10	1.16e-27	2.28e-33	1.08e-12	3.97e-13	0.0357	NS	NS	NS	NS	3.72e-44	2.64e-21	1.11e-23	2.59e-10	1.12e-09	1.04e-12	3.22e-16	5.65e-17	2.39e-09	1.73e-10
42430	indole-containing compound metabolic process (GO:0042430)	0.00316	0.000193	NS	NS	NS	NS	NS	NS	NS	NS	NS	0.000193	3.89e-08	NS	NS	NS	NS	NS	NS	NS	0.00108	0.00155	NS	NS	NS	0.0321	0.000742	3.12e-05	0.0199	NS
120254	olefinic compound metabolic process (GO:0120254)	NS	NS	NS	NS	NS	NS	NS	NS	NS	NS	NS	NS	NS	NS	NS	NS	NS	NS	0.0122	NS	NS	NS	NS	NS	NS	0.0119	0.0124	0.0101	NS	NS
7059	chromosome segregation (GO:0007059)	NS	NS	NS	NS	NS	NS	NS	NS	NS	NS	NS	NS	NS	NS	NS	0.000237	0.000133	4.96e-08	0.00135	5.32e-07	NS	NS	NS	NS	NS	NS	NS	0.00542	NS	0.0207
9785	blue light signaling pathway (GO:0009785)	NS	NS	NS	NS	NS	NS	NS	NS	NS	NS	NS	NS	NS	NS	NS	NS	NS	NS	NS	0.038	NS	NS	NS	NS	NS	0.00357	0.0181	0.0343	0.0266	0.00625
51174	regulation of phosphorus metabolic process (GO:0051174)	NS	NS	NS	NS	NS	NS	NS	NS	NS	NS	NS	NS	NS	NS	NS	NS	NS	0.000397	0.032	0.00959	NS	NS	NS	NS	NS	NS	NS	0.00352	NS	NS
19252	starch biosynthetic process (GO:0019252)	NS	NS	NS	NS	NS	NS	NS	NS	NS	NS	NS	NS	NS	NS	NS	3.33e-08	1.93e-06	1.51e-07	2.93e-06	0.00187	NS	NS	NS	NS	NS	0.000523	0.00491	0.00157	0.00412	NS
6955	immune response (GO:0006955)	0.0157	0.00548	NS	NS	NS	NS	NS	NS	NS	NS	0.0031	0.0153	0.00147	0.0458	NS	NS	NS	NS	NS	NS	0.000314	NS	NS	NS	NS	NS	NS	NS	NS	NS
170034	L-amino acid biosynthetic process (GO:0170034)	NS	NS	NS	NS	NS	NS	NS	NS	NS	NS	NS	NS	NS	NS	NS	4e-05	0.0203	0.0103	0.00279	NS	NS	NS	NS	NS	NS	0.02	NS	0.0416	NS	NS
30071	regulation of mitotic metaphase/anaphase transition (GO:0030071)	NS	NS	NS	NS	NS	NS	NS	NS	NS	NS	NS	NS	NS	NS	NS	NS	NS	0.00796	NS	NS	NS	NS	NS	NS	NS	NS	NS	0.0331	NS	NS
45859	regulation of protein kinase activity (GO:0045859)	NS	NS	NS	NS	NS	NS	NS	NS	NS	NS	NS	NS	NS	NS	NS	NS	0.00422	3.68e-05	NS	9.1e-05	NS	NS	NS	NS	NS	NS	NS	0.00761	NS	0.0048
1900069	regulation of cellular hyperosmotic salinity response (GO:1900069)	NS	NS	NS	NS	NS	NS	NS	NS	NS	NS	NS	NS	NS	NS	NS	NS	NS	0.0466	NS	0.00894	NS	NS	NS	NS	NS	NS	NS	NS	NS	0.0401
1905157	positive regulation of photosynthesis (GO:1905157)	NS	NS	NS	NS	NS	NS	NS	NS	NS	NS	NS	NS	NS	NS	NS	NS	0.0462	NS	NS	NS	NS	NS	NS	NS	NS	0.0285	0.0193	NS	NS	NS
9092	homoserine metabolic process (GO:0009092)	NS	NS	NS	NS	NS	NS	NS	NS	NS	NS	NS	NS	NS	NS	NS	0.0236	0.0142	0.0172	0.000858	NS	NS	NS	NS	NS	NS	NS	0.0318	0.0457	0.00295	NS
7076	mitotic chromosome condensation (GO:0007076)	NS	NS	NS	NS	NS	NS	NS	NS	NS	NS	NS	NS	NS	NS	NS	0.00117	0.00767	4.71e-05	2.22e-05	0.000314	NS	NS	NS	NS	NS	0.00312	0.0156	0.000138	5.86e-05	0.00518
1901465	positive regulation of tetrapyrrole biosynthetic process (GO:1901465)	NS	NS	NS	NS	NS	NS	NS	NS	NS	NS	NS	NS	NS	NS	NS	NS	0.00898	0.0123	NS	NS	NS	NS	NS	NS	NS	NS	0.00822	NS	NS	NS
9611	response to wounding (GO:0009611)	NS	9.74e-06	NS	NS	NS	1.13e-06	NS	NS	NS	NS	0.000722	2.45e-07	3.09e-12	0.00024	0.00385	0.000991	NS	NS	NS	NS	4.17e-09	0.000383	0.00734	0.00298	0.00239	1.03e-08	2.88e-06	3.06e-09	1.94e-06	0.000143
42325	regulation of phosphorylation (GO:0042325)	NS	NS	NS	NS	NS	NS	NS	NS	NS	NS	NS	NS	NS	NS	NS	NS	0.0377	3.99e-05	0.0256	0.000498	NS	NS	NS	NS	NS	NS	NS	0.00279	NS	0.0115
32506	cytokinetic process (GO:0032506)	NS	NS	NS	NS	NS	NS	NS	NS	NS	NS	NS	NS	NS	NS	NS	0.0365	NS	0.0276	NS	0.00104	NS	NS	NS	NS	NS	NS	NS	NS	NS	0.0161
45087	innate immune response (GO:0045087)	0.00737	0.00328	NS	NS	NS	NS	NS	NS	NS	NS	0.00134	0.0108	0.00203	0.0214	NS	NS	NS	NS	NS	NS	0.000471	0.0461	NS	NS	NS	NS	NS	NS	NS	NS
31577	spindle checkpoint signaling (GO:0031577)	NS	NS	NS	NS	NS	NS	NS	NS	NS	NS	NS	NS	NS	NS	NS	NS	NS	0.000408	NS	NS	NS	NS	NS	NS	NS	NS	NS	0.00277	NS	NS
48826	cotyledon morphogenesis (GO:0048826)	NS	NS	NS	NS	NS	NS	NS	NS	NS	NS	NS	NS	NS	NS	NS	NS	NS	0.000654	0.0198	NS	NS	NS	NS	NS	NS	NS	NS	0.0121	NS	NS
33044	regulation of chromosome organization (GO:0033044)	NS	NS	NS	NS	NS	NS	NS	NS	NS	NS	NS	NS	NS	NS	NS	NS	NS	0.00239	NS	NS	NS	NS	NS	NS	NS	NS	NS	0.0469	NS	NS
914	phragmoplast assembly (GO:0000914)	NS	NS	NS	NS	NS	NS	NS	NS	NS	NS	NS	NS	NS	NS	NS	NS	NS	NS	NS	0.00612	NS	NS	NS	NS	NS	NS	NS	NS	NS	0.0442
1901987	regulation of cell cycle phase transition (GO:1901987)	NS	NS	NS	NS	NS	NS	NS	NS	NS	NS	NS	NS	NS	NS	NS	NS	NS	9.04e-07	NS	NS	NS	NS	NS	NS	NS	NS	NS	0.0109	NS	NS
10581	regulation of starch biosynthetic process (GO:0010581)	NS	NS	NS	NS	NS	NS	NS	NS	NS	NS	NS	NS	NS	NS	NS	NS	0.036	0.0395	NS	NS	NS	NS	NS	NS	NS	NS	0.0449	NS	NS	NS
51647	nucleus localization (GO:0051647)	NS	NS	NS	NS	NS	NS	NS	NS	NS	NS	NS	NS	NS	NS	NS	NS	NS	0.0396	NS	NS	NS	NS	NS	NS	NS	0.01	0.0056	NS	NS	NS
70887	cellular response to chemical stimulus (GO:0070887)	5.62e-12	2.49e-18	4.06e-13	4.21e-05	0.000171	3.99e-20	NS	2.21e-06	0.000539	0.00413	1.43e-16	6.38e-33	2.6e-34	2.65e-16	4e-13	0.000292	NS	NS	NS	NS	1.99e-35	5.58e-19	2.05e-20	6.93e-10	5.17e-08	2.41e-22	5.47e-27	3.99e-25	1.94e-15	1.85e-12
1904029	regulation of cyclin-dependent protein kinase activity (GO:1904029)	NS	NS	NS	NS	NS	NS	NS	NS	NS	NS	NS	NS	NS	NS	NS	NS	0.00266	1.67e-05	NS	5.79e-05	NS	NS	NS	NS	NS	NS	NS	0.00501	NS	0.00295
10206	photosystem II repair (GO:0010206)	NS	NS	NS	NS	NS	NS	NS	NS	NS	NS	NS	NS	NS	NS	NS	3.82e-06	2.16e-05	4e-05	NS	0.00415	NS	NS	NS	NS	NS	0.000931	0.00275	0.00538	NS	0.048
10117	photoprotection (GO:0010117)	NS	NS	NS	NS	NS	NS	NS	NS	NS	NS	NS	NS	NS	NS	NS	0.00108	0.0212	0.027	0.00866	NS	NS	NS	NS	NS	NS	0.000322	0.0253	0.0415	0.0365	NS
9098	leucine biosynthetic process (GO:0009098)	NS	NS	NS	NS	NS	NS	NS	NS	NS	NS	NS	NS	NS	NS	NS	0.0114	0.0303	NS	0.0114	NS	NS	NS	NS	NS	NS	0.0221	NS	NS	NS	NS
9056	catabolic process (GO:0009056)	0.0292	NS	NS	NS	NS	NS	NS	0.000992	NS	0.00537	2.47e-10	1.43e-15	4.79e-15	1.15e-11	3.5e-06	NS	NS	NS	NS	NS	0.000194	NS	0.000658	NS	0.0142	4.42e-09	1.29e-08	1.5e-08	3.59e-12	0.000425
7019	microtubule depolymerization (GO:0007019)	NS	NS	NS	NS	NS	NS	NS	NS	NS	NS	NS	NS	NS	NS	NS	NS	NS	0.00199	NS	NS	NS	NS	NS	NS	NS	NS	NS	0.0458	NS	NS
1901988	negative regulation of cell cycle phase transition (GO:1901988)	NS	NS	NS	NS	NS	NS	NS	NS	NS	NS	NS	NS	NS	NS	NS	NS	NS	1.06e-05	NS	NS	NS	NS	NS	NS	NS	NS	NS	0.015	NS	NS
90698	post-embryonic plant morphogenesis (GO:0090698)	NS	NS	NS	NS	NS	NS	NS	NS	NS	NS	NS	NS	NS	NS	NS	NS	NS	0.0149	NS	NS	NS	NS	NS	NS	NS	NS	NS	0.0478	NS	NS
9090	homoserine biosynthetic process (GO:0009090)	NS	NS	NS	NS	NS	NS	NS	NS	NS	NS	NS	NS	NS	NS	NS	0.0121	0.0081	0.00933	0.000819	NS	NS	NS	NS	NS	NS	NS	NS	NS	0.0131	NS
6112	energy reserve metabolic process (GO:0006112)	NS	NS	NS	NS	NS	NS	NS	NS	NS	NS	NS	NS	NS	NS	NS	2.03e-06	0.000104	0.00135	0.00128	NS	NS	NS	NS	NS	NS	0.000814	0.0104	NS	NS	NS
61458	reproductive system development (GO:0061458)	NS	NS	NS	NS	NS	NS	NS	NS	NS	NS	NS	NS	NS	NS	NS	NS	NS	2.94e-05	NS	NS	NS	NS	NS	NS	NS	0.0062	NS	0.0124	NS	NS
42542	response to hydrogen peroxide (GO:0042542)	0.00699	NS	NS	NS	NS	0.0111	NS	NS	NS	0.0269	0.0212	0.0413	0.0108	0.00671	0.000301	NS	NS	NS	NS	NS	3.72e-06	NS	NS	NS	0.000154	0.000559	0.0114	0.00257	0.00176	0.00128
51301	cell division (GO:0051301)	NS	NS	NS	NS	NS	NS	NS	NS	NS	NS	NS	NS	NS	NS	NS	0.000845	0.000808	9.38e-09	0.00026	7.05e-05	NS	NS	NS	NS	NS	0.00814	0.0014	7.43e-08	0.0173	0.023
2000816	negative regulation of mitotic sister chromatid separation (GO:2000816)	NS	NS	NS	NS	NS	NS	NS	NS	NS	NS	NS	NS	NS	NS	NS	NS	NS	0.000424	NS	NS	NS	NS	NS	NS	NS	NS	NS	0.00285	NS	NS
65008	regulation of biological quality (GO:0065008)	NS	NS	NS	NS	NS	NS	NS	NS	NS	NS	0.00528	NS	NS	NS	NS	NS	NS	NS	NS	NS	NS	NS	NS	NS	NS	0.00964	0.00875	0.0155	NS	NS
33048	negative regulation of mitotic sister chromatid segregation (GO:0033048)	NS	NS	NS	NS	NS	NS	NS	NS	NS	NS	NS	NS	NS	NS	NS	NS	NS	0.000419	NS	NS	NS	NS	NS	NS	NS	NS	NS	0.00282	NS	NS
5991	trehalose metabolic process (GO:0005991)	NS	0.00355	NS	NS	NS	NS	NS	NS	NS	NS	NS	NS	NS	0.05	0.0135	0.0462	NS	NS	NS	NS	0.0286	0.000312	0.0324	NS	NS	0.000615	0.0363	0.00235	0.0127	0.000405
42794	plastid rRNA transcription (GO:0042794)	NS	NS	NS	NS	NS	NS	NS	NS	NS	NS	NS	NS	NS	NS	NS	NS	0.00815	0.000395	NS	NS	NS	NS	NS	NS	NS	NS	NS	0.00708	NS	NS
1901663	quinone biosynthetic process (GO:1901663)	NS	NS	NS	NS	NS	NS	NS	NS	NS	NS	NS	NS	NS	NS	NS	3.75e-05	0.000207	0.000115	0.00788	NS	NS	NS	NS	NS	NS	0.017	0.00462	0.0399	NS	NS
9311	oligosaccharide metabolic process (GO:0009311)	NS	NS	NS	NS	NS	0.027	0.00833	NS	NS	0.0419	NS	0.0232	NS	NS	NS	0.0044	NS	NS	NS	NS	0.000317	0.00056	0.00284	0.0208	0.0365	0.00576	0.00118	0.00791	NS	0.0406
6783	heme biosynthetic process (GO:0006783)	NS	NS	NS	NS	NS	NS	NS	NS	NS	NS	NS	NS	NS	NS	NS	3.82e-05	0.000581	0.00493	NS	0.0384	NS	NS	NS	NS	NS	0.00362	0.00501	0.0344	NS	NS
5992	trehalose biosynthetic process (GO:0005992)	NS	0.00264	NS	NS	NS	NS	NS	NS	NS	NS	NS	NS	NS	NS	NS	0.0285	NS	NS	NS	NS	0.0171	0.000183	0.0221	0.0436	NS	0.000811	NS	0.00312	0.0266	0.00111
10468	regulation of gene expression (GO:0010468)	NS	NS	NS	NS	NS	0.0313	NS	NS	NS	NS	5.11e-07	0.00138	NS	0.00374	0.00064	0.0213	NS	NS	NS	NS	0.0347	NS	NS	NS	NS	NS	NS	NS	NS	NS
19464	glycine decarboxylation via glycine cleavage system (GO:0019464)	NS	NS	NS	NS	NS	NS	NS	NS	NS	NS	NS	NS	NS	NS	NS	0.00224	0.00137	5.69e-05	7.65e-05	NS	NS	NS	NS	NS	NS	0.0299	0.0192	0.00211	0.00249	NS
10556	regulation of macromolecule biosynthetic process (GO:0010556)	NS	NS	NS	NS	NS	0.0333	NS	NS	NS	NS	1.83e-07	0.00175	0.0497	0.00356	0.000877	0.0227	NS	NS	NS	NS	0.0442	NS	NS	NS	NS	NS	NS	NS	NS	NS
34248	regulation of amide metabolic process (GO:0034248)	NS	NS	NS	NS	NS	NS	NS	NS	NS	NS	NS	NS	NS	NS	NS	NS	0.0452	0.00232	NS	NS	NS	NS	NS	NS	NS	NS	0.0377	0.00193	NS	NS
70125	mitochondrial translational elongation (GO:0070125)	NS	NS	NS	NS	NS	NS	NS	NS	NS	NS	NS	NS	NS	NS	NS	NS	NS	0.0209	NS	NS	NS	NS	NS	NS	NS	NS	NS	0.0253	NS	NS
170038	proteinogenic amino acid biosynthetic process (GO:0170038)	NS	NS	NS	NS	NS	NS	NS	NS	NS	NS	NS	NS	NS	NS	NS	4.03e-05	0.0204	0.0103	0.0028	NS	NS	NS	NS	NS	NS	0.0201	NS	0.0416	NS	NS
9773	photosynthetic electron transport in photosystem I (GO:0009773)	NS	NS	NS	NS	NS	NS	NS	NS	NS	NS	NS	NS	NS	NS	NS	6.34e-08	3.55e-06	7.81e-05	2.32e-06	0.0127	NS	NS	NS	NS	NS	9.37e-05	0.00133	0.0132	0.000817	NS
910	cytokinesis (GO:0000910)	NS	NS	NS	NS	NS	NS	NS	NS	NS	NS	NS	NS	NS	NS	NS	0.001	0.000296	9.66e-07	1.07e-05	8.93e-08	NS	NS	NS	NS	NS	0.0173	0.000754	0.000126	0.00512	0.000428
1900871	chloroplast mRNA modification (GO:1900871)	NS	NS	NS	NS	NS	NS	NS	NS	NS	NS	NS	NS	NS	NS	NS	NS	0.00236	0.0469	NS	NS	NS	NS	NS	NS	NS	NS	0.0194	NS	NS	NS
1902100	negative regulation of metaphase/anaphase transition of cell cycle (GO:1902100)	NS	NS	NS	NS	NS	NS	NS	NS	NS	NS	NS	NS	NS	NS	NS	NS	NS	0.000411	NS	NS	NS	NS	NS	NS	NS	NS	NS	0.00278	NS	NS
71900	regulation of protein serine/threonine kinase activity (GO:0071900)	NS	NS	NS	NS	NS	NS	NS	NS	NS	NS	NS	NS	NS	NS	NS	NS	0.00267	1.68e-05	NS	5.89e-05	NS	NS	NS	NS	NS	NS	NS	0.00502	NS	0.00297
9110	vitamin biosynthetic process (GO:0009110)	NS	NS	NS	NS	NS	NS	NS	NS	NS	NS	NS	NS	NS	NS	NS	0.000155	0.0187	0.0151	0.00546	NS	NS	NS	NS	NS	NS	0.0145	NS	NS	NS	NS
50821	protein stabilization (GO:0050821)	NS	NS	NS	NS	NS	NS	NS	NS	NS	NS	NS	NS	NS	NS	NS	3.49e-05	0.00594	0.00265	NS	0.0043	NS	NS	NS	NS	NS	0.00746	NS	NS	NS	NS
31537	regulation of anthocyanin metabolic process (GO:0031537)	NS	NS	NS	NS	NS	NS	NS	NS	NS	NS	NS	NS	NS	NS	NS	NS	NS	0.0266	NS	NS	NS	NS	NS	NS	NS	NS	0.0165	NS	NS	NS
6270	DNA replication initiation (GO:0006270)	NS	NS	NS	NS	NS	NS	NS	NS	NS	NS	NS	NS	NS	NS	NS	NS	0.00186	0.00307	NS	NS	NS	NS	NS	NS	NS	NS	0.0488	NS	NS	NS
6081	cellular aldehyde metabolic process (GO:0006081)	NS	NS	NS	NS	NS	NS	NS	NS	NS	NS	NS	NS	NS	NS	NS	0.000993	0.0176	0.00527	0.00215	NS	NS	NS	NS	NS	NS	0.000218	0.0159	0.00454	0.0177	NS
911	cytokinesis by cell plate formation (GO:0000911)	NS	NS	NS	NS	NS	NS	NS	NS	NS	NS	NS	NS	NS	NS	NS	0.00382	0.00246	8.07e-06	0.000195	8.28e-07	NS	NS	NS	NS	NS	NS	0.00344	0.00059	0.0235	0.0033
90333	regulation of stomatal closure (GO:0090333)	NS	NS	NS	NS	NS	0.0437	NS	NS	NS	NS	NS	NS	0.0203	NS	NS	0.028	NS	NS	NS	NS	NS	NS	NS	NS	NS	0.0151	0.0204	0.0127	NS	NS
19953	sexual reproduction (GO:0019953)	NS	NS	NS	NS	NS	NS	NS	NS	NS	NS	NS	NS	0.00628	NS	NS	NS	NS	0.00408	NS	NS	NS	NS	NS	NS	NS	NS	NS	NS	NS	NS
9138	pyrimidine nucleoside diphosphate metabolic process (GO:0009138)	NS	NS	NS	NS	NS	NS	NS	NS	NS	NS	0.0262	NS	NS	NS	NS	NS	NS	NS	NS	NS	NS	NS	NS	NS	NS	0.0301	NS	NS	NS	NS
31146	SCF-dependent proteasomal ubiquitin-dependent protein catabolic process (GO:0031146)	NS	NS	NS	NS	NS	NS	NS	NS	NS	NS	0.00924	0.000853	0.00469	0.0127	NS	NS	NS	0.0155	NS	NS	NS	NS	NS	NS	NS	NS	NS	NS	NS	NS
45893	positive regulation of DNA-templated transcription (GO:0045893)	NS	NS	NS	NS	NS	0.0214	NS	NS	NS	NS	NS	NS	NS	NS	NS	0.0244	NS	NS	NS	NS	0.0489	NS	NS	NS	NS	NS	NS	NS	NS	NS
9057	macromolecule catabolic process (GO:0009057)	NS	NS	NS	NS	NS	NS	NS	NS	NS	NS	0.00115	0.000558	0.00557	0.0225	NS	NS	NS	0.0341	NS	NS	NS	NS	NS	NS	NS	NS	NS	NS	NS	NS
7034	vacuolar transport (GO:0007034)	NS	NS	NS	NS	NS	NS	NS	NS	NS	NS	0.00159	NS	0.000384	0.0202	NS	NS	0.0263	0.031	NS	NS	NS	NS	NS	NS	NS	NS	NS	NS	NS	NS
10374	stomatal complex development (GO:0010374)	NS	NS	NS	NS	NS	NS	NS	NS	NS	NS	NS	NS	0.0109	NS	NS	NS	NS	0.000238	NS	NS	NS	NS	NS	NS	NS	NS	NS	NS	NS	NS
1902680	positive regulation of RNA biosynthetic process (GO:1902680)	NS	NS	NS	NS	NS	0.0214	NS	NS	NS	NS	NS	NS	NS	NS	NS	0.0245	NS	NS	NS	NS	0.049	NS	NS	NS	NS	NS	NS	NS	NS	NS
51254	positive regulation of RNA metabolic process (GO:0051254)	NS	NS	NS	NS	NS	0.0225	NS	NS	NS	NS	NS	NS	NS	NS	NS	0.02	NS	NS	NS	NS	0.0451	NS	NS	NS	NS	NS	NS	NS	NS	NS
9756	carbohydrate mediated signaling (GO:0009756)	NS	NS	NS	NS	NS	NS	NS	NS	NS	NS	0.0384	NS	NS	NS	NS	NS	NS	NS	NS	NS	NS	NS	NS	NS	NS	NS	0.0294	0.0343	0.00542	NS
10228	vegetative to reproductive phase transition of meristem (GO:0010228)	NS	NS	NS	NS	NS	NS	NS	NS	NS	NS	0.0272	NS	NS	NS	NS	NS	NS	NS	NS	NS	NS	NS	NS	NS	NS	0.00749	NS	NS	NS	NS
46865	terpenoid transport (GO:0046865)	NS	NS	NS	NS	NS	NS	NS	NS	NS	NS	NS	NS	NS	NS	NS	NS	NS	NS	NS	NS	NS	NS	0.014	NS	NS	NS	NS	NS	NS	NS
120252	hydrocarbon metabolic process (GO:0120252)	NS	NS	NS	NS	NS	NS	NS	NS	NS	NS	NS	NS	NS	NS	NS	NS	NS	NS	NS	NS	0.0304	NS	NS	NS	NS	NS	NS	NS	NS	NS
1902221	erythrose 4-phosphate/phosphoenolpyruvate family amino acid metabolic process (GO:1902221)	NS	NS	NS	NS	NS	NS	NS	NS	NS	NS	NS	NS	NS	NS	NS	NS	NS	NS	NS	NS	0.0478	NS	NS	NS	NS	NS	NS	NS	NS	NS
90332	stomatal closure (GO:0090332)	NS	NS	NS	NS	NS	NS	NS	NS	NS	NS	NS	NS	NS	NS	NS	NS	NS	NS	NS	NS	0.0479	NS	NS	NS	NS	NS	NS	NS	NS	NS
6722	triterpenoid metabolic process (GO:0006722)	NS	NS	NS	NS	NS	NS	NS	NS	NS	NS	NS	NS	NS	NS	NS	NS	NS	NS	NS	NS	0.0126	NS	NS	NS	NS	NS	NS	NS	NS	NS
46864	isoprenoid transport (GO:0046864)	NS	NS	NS	NS	NS	NS	NS	NS	NS	NS	NS	NS	NS	NS	NS	NS	NS	NS	NS	NS	NS	NS	0.014	NS	NS	NS	NS	NS	NS	NS
80170	hydrogen peroxide transmembrane transport (GO:0080170)	NS	NS	NS	NS	NS	NS	NS	NS	NS	NS	NS	NS	NS	NS	NS	NS	NS	NS	NS	NS	0.0233	NS	NS	NS	NS	NS	NS	NS	NS	NS
71588	hydrogen peroxide mediated signaling pathway (GO:0071588)	NS	NS	NS	NS	NS	NS	NS	NS	NS	NS	NS	NS	NS	NS	NS	NS	NS	NS	NS	NS	0.0102	NS	NS	NS	NS	NS	NS	NS	NS	NS
15749	monosaccharide transmembrane transport (GO:0015749)	NS	NS	NS	NS	NS	NS	NS	NS	NS	NS	NS	NS	NS	NS	NS	NS	NS	NS	NS	NS	NS	0.0435	NS	NS	NS	NS	NS	NS	NS	NS
15698	inorganic anion transport (GO:0015698)	NS	NS	NS	NS	NS	NS	NS	NS	NS	NS	NS	NS	NS	NS	NS	NS	NS	NS	NS	NS	0.0338	NS	NS	NS	NS	NS	NS	NS	NS	NS
22618	protein-RNA complex assembly (GO:0022618)	NS	NS	NS	NS	NS	NS	NS	NS	NS	NS	NS	NS	NS	NS	NS	NS	NS	NS	NS	NS	0.012	NS	NS	NS	NS	NS	NS	NS	NS	NS
42445	hormone metabolic process (GO:0042445)	NS	NS	NS	NS	NS	NS	NS	NS	NS	NS	NS	NS	NS	NS	NS	NS	NS	NS	NS	NS	0.0423	NS	NS	NS	NS	NS	NS	NS	NS	NS
51668	localization within membrane (GO:0051668)	NS	NS	NS	NS	NS	NS	NS	NS	NS	NS	NS	NS	NS	NS	NS	NS	NS	NS	NS	NS	NS	NS	0.0186	NS	NS	NS	NS	NS	NS	NS
6809	nitric oxide biosynthetic process (GO:0006809)	NS	NS	NS	NS	NS	NS	NS	NS	NS	NS	NS	NS	NS	NS	NS	NS	NS	NS	NS	NS	0.0234	NS	NS	NS	NS	NS	NS	NS	NS	NS
51592	response to calcium ion (GO:0051592)	NS	NS	NS	NS	NS	NS	NS	NS	NS	NS	NS	NS	NS	NS	NS	NS	NS	NS	NS	NS	NS	NS	0.0494	NS	NS	NS	NS	NS	NS	NS
34219	carbohydrate transmembrane transport (GO:0034219)	NS	NS	NS	NS	NS	NS	NS	NS	NS	NS	NS	NS	NS	NS	NS	NS	NS	NS	NS	NS	NS	0.0135	0.0368	NS	NS	NS	NS	NS	NS	NS
6012	galactose metabolic process (GO:0006012)	NS	NS	NS	NS	NS	NS	NS	NS	NS	NS	NS	NS	NS	NS	NS	NS	NS	NS	NS	NS	NS	NS	0.0463	NS	NS	NS	NS	NS	NS	NS
6558	L-phenylalanine metabolic process (GO:0006558)	NS	NS	NS	NS	NS	NS	NS	NS	NS	NS	NS	NS	NS	NS	NS	NS	NS	NS	NS	NS	0.0481	NS	NS	NS	NS	NS	NS	NS	NS	NS
46209	nitric oxide metabolic process (GO:0046209)	NS	NS	NS	NS	NS	NS	NS	NS	NS	NS	NS	NS	NS	NS	NS	NS	NS	NS	NS	NS	0.0232	NS	NS	NS	NS	NS	NS	NS	NS	NS
6817	phosphate ion transport (GO:0006817)	NS	NS	NS	NS	NS	NS	NS	NS	NS	NS	NS	NS	NS	NS	NS	NS	NS	NS	NS	NS	0.0054	NS	NS	NS	NS	NS	NS	NS	NS	NS
31408	oxylipin biosynthetic process (GO:0031408)	NS	NS	NS	NS	NS	NS	NS	NS	NS	NS	NS	NS	NS	NS	NS	NS	NS	NS	NS	NS	0.0225	NS	NS	NS	NS	NS	NS	NS	NS	NS
1510	RNA methylation (GO:0001510)	NS	NS	NS	NS	NS	NS	NS	NS	NS	NS	NS	NS	NS	NS	NS	NS	NS	NS	NS	NS	0.0141	NS	NS	NS	NS	NS	NS	NS	NS	NS
15706	nitrate transmembrane transport (GO:0015706)	NS	NS	NS	NS	NS	NS	NS	NS	NS	NS	NS	NS	NS	NS	NS	NS	NS	NS	NS	NS	NS	NS	NS	NS	0.0329	NS	NS	NS	NS	NS
18193	peptidyl-amino acid modification (GO:0018193)	NS	NS	NS	NS	NS	NS	NS	NS	NS	NS	NS	NS	NS	NS	NS	NS	NS	NS	NS	NS	NS	0.0166	NS	NS	NS	NS	NS	NS	NS	NS
10067	procambium histogenesis (GO:0010067)	NS	NS	NS	NS	NS	NS	NS	NS	NS	NS	NS	NS	NS	NS	NS	NS	NS	NS	NS	NS	0.0284	NS	NS	NS	NS	NS	NS	NS	NS	NS
71826	protein-RNA complex organization (GO:0071826)	NS	NS	NS	NS	NS	NS	NS	NS	NS	NS	NS	NS	NS	NS	NS	NS	NS	NS	NS	NS	0.0309	NS	NS	NS	NS	NS	NS	NS	NS	NS
98661	inorganic anion transmembrane transport (GO:0098661)	NS	NS	NS	NS	NS	NS	NS	NS	NS	NS	NS	NS	NS	NS	NS	NS	NS	NS	NS	NS	NS	NS	NS	NS	0.0141	NS	NS	NS	NS	NS
31407	oxylipin metabolic process (GO:0031407)	NS	NS	NS	NS	NS	NS	NS	NS	NS	NS	NS	NS	NS	NS	NS	NS	NS	NS	NS	NS	0.0355	NS	NS	NS	NS	NS	NS	NS	NS	NS
2000895	hemicellulose catabolic process (GO:2000895)	NS	NS	NS	NS	0.0434	NS	NS	NS	NS	NS	NS	NS	NS	NS	NS	NS	NS	NS	NS	NS	NS	NS	NS	NS	NS	NS	NS	NS	NS	NS
302	response to reactive oxygen species (GO:0000302)	0.00619	NS	NS	NS	NS	0.00123	NS	NS	NS	0.00142	NS	0.000805	4.12e-05	0.0324	0.00933	0.000127	NS	NS	NS	NS	2.59e-07	0.0417	0.0223	NS	5.83e-05	4.53e-07	8.97e-05	6.76e-07	0.000873	0.00537
15802	basic amino acid transport (GO:0015802)	NS	0.0406	NS	NS	NS	NS	NS	NS	NS	NS	NS	NS	NS	NS	NS	NS	NS	NS	NS	NS	NS	NS	NS	NS	NS	NS	NS	NS	NS	NS
6664	glycolipid metabolic process (GO:0006664)	NS	0.025	NS	NS	0.0247	NS	NS	NS	NS	NS	NS	NS	NS	NS	NS	NS	NS	NS	NS	NS	NS	NS	NS	NS	NS	NS	NS	NS	NS	NS
1903509	liposaccharide metabolic process (GO:1903509)	NS	0.0243	NS	NS	0.024	NS	NS	NS	NS	NS	NS	NS	NS	NS	NS	NS	NS	NS	NS	NS	NS	NS	NS	NS	NS	NS	NS	NS	NS	NS
15850	organic hydroxy compound transport (GO:0015850)	NS	NS	0.0126	NS	NS	NS	NS	NS	NS	NS	NS	NS	NS	NS	NS	NS	NS	NS	NS	NS	NS	NS	NS	NS	NS	NS	NS	NS	NS	NS
46475	glycerophospholipid catabolic process (GO:0046475)	NS	0.04	NS	NS	NS	NS	NS	NS	NS	NS	NS	NS	NS	NS	NS	NS	NS	NS	NS	NS	NS	NS	NS	NS	NS	NS	NS	NS	NS	NS
46503	glycerolipid catabolic process (GO:0046503)	NS	NS	0.0423	NS	NS	NS	NS	NS	NS	NS	NS	NS	NS	NS	NS	NS	NS	NS	NS	NS	NS	NS	NS	NS	NS	NS	NS	NS	NS	NS
71417	cellular response to organonitrogen compound (GO:0071417)	NS	0.0309	NS	NS	NS	NS	NS	NS	NS	NS	NS	NS	NS	NS	NS	NS	NS	NS	NS	NS	NS	NS	NS	NS	NS	NS	NS	NS	NS	NS
10683	tricyclic triterpenoid metabolic process (GO:0010683)	0.0224	NS	NS	NS	NS	NS	NS	NS	NS	NS	NS	NS	NS	NS	NS	NS	NS	NS	NS	NS	NS	NS	NS	NS	NS	NS	NS	NS	NS	NS
30001	metal ion transport (GO:0030001)	0.021	NS	NS	NS	NS	NS	NS	NS	NS	NS	NS	NS	NS	NS	NS	NS	NS	NS	NS	NS	NS	NS	NS	NS	NS	NS	NS	NS	NS	NS
51259	protein complex oligomerization (GO:0051259)	NS	NS	NS	NS	0.024	NS	NS	NS	NS	NS	NS	NS	NS	NS	NS	NS	NS	NS	NS	NS	NS	NS	NS	NS	NS	NS	NS	NS	NS	NS
120251	hydrocarbon biosynthetic process (GO:0120251)	0.0227	NS	NS	NS	NS	NS	NS	NS	NS	NS	NS	NS	NS	NS	NS	NS	NS	NS	NS	NS	NS	NS	NS	NS	NS	NS	NS	NS	NS	NS
80027	response to herbivore (GO:0080027)	NS	0.0352	NS	NS	NS	NS	NS	NS	NS	NS	NS	NS	NS	NS	NS	NS	NS	NS	NS	NS	NS	NS	NS	NS	NS	NS	NS	NS	NS	NS
15851	nucleobase transport (GO:0015851)	NS	NS	0.0471	NS	NS	NS	NS	NS	NS	NS	NS	NS	NS	NS	NS	NS	NS	NS	NS	NS	NS	NS	NS	NS	NS	NS	NS	NS	NS	NS
1901699	cellular response to nitrogen compound (GO:1901699)	NS	0.0245	NS	NS	NS	NS	NS	NS	NS	NS	NS	NS	NS	NS	NS	NS	NS	NS	NS	NS	NS	NS	NS	NS	NS	NS	NS	NS	NS	NS
45493	xylan catabolic process (GO:0045493)	NS	NS	NS	NS	0.0443	NS	NS	NS	NS	NS	NS	NS	NS	NS	NS	NS	NS	NS	NS	NS	NS	NS	NS	NS	NS	NS	NS	NS	NS	NS
51262	protein tetramerization (GO:0051262)	NS	NS	NS	NS	0.0425	NS	NS	NS	NS	NS	NS	NS	NS	NS	NS	NS	NS	NS	NS	NS	NS	NS	NS	NS	NS	NS	NS	NS	NS	NS
9901	anther dehiscence (GO:0009901)	NS	NS	NS	NS	NS	NS	NS	0.0498	NS	NS	NS	NS	NS	NS	NS	NS	NS	NS	NS	NS	NS	NS	NS	NS	NS	NS	NS	NS	NS	NS
34655	nucleobase-containing compound catabolic process (GO:0034655)	NS	NS	NS	NS	NS	NS	NS	NS	NS	0.0195	NS	NS	NS	NS	NS	NS	NS	NS	NS	NS	NS	NS	NS	NS	NS	NS	NS	NS	NS	NS
16128	phytosteroid metabolic process (GO:0016128)	NS	NS	NS	NS	NS	NS	NS	0.0487	NS	NS	NS	NS	NS	NS	NS	NS	NS	NS	NS	NS	NS	NS	NS	NS	NS	NS	NS	NS	NS	NS
48609	multicellular organismal reproductive process (GO:0048609)	NS	NS	NS	NS	NS	NS	0.0443	0.0266	NS	NS	NS	NS	NS	NS	NS	NS	NS	NS	NS	NS	NS	NS	NS	NS	NS	NS	NS	NS	NS	NS
46365	monosaccharide catabolic process (GO:0046365)	NS	NS	NS	NS	NS	NS	NS	NS	NS	0.0161	NS	NS	NS	NS	NS	NS	NS	NS	NS	NS	NS	NS	NS	NS	NS	NS	NS	NS	NS	NS
45814	negative regulation of gene expression, epigenetic (GO:0045814)	NS	NS	NS	NS	NS	0.0356	NS	NS	NS	NS	NS	NS	NS	NS	NS	NS	NS	NS	NS	NS	NS	NS	NS	NS	NS	NS	NS	NS	NS	NS
16131	brassinosteroid metabolic process (GO:0016131)	NS	NS	NS	NS	NS	NS	NS	0.0489	NS	NS	NS	NS	NS	NS	NS	NS	NS	NS	NS	NS	NS	NS	NS	NS	NS	NS	NS	NS	NS	NS
9631	cold acclimation (GO:0009631)	NS	NS	NS	NS	NS	0.00244	NS	0.0443	0.00406	NS	NS	NS	NS	NS	NS	NS	NS	NS	NS	NS	NS	NS	NS	NS	NS	NS	NS	NS	NS	NS
6007	glucose catabolic process (GO:0006007)	NS	NS	NS	NS	NS	NS	NS	NS	NS	0.0201	NS	NS	NS	NS	NS	NS	NS	NS	NS	NS	NS	NS	NS	NS	NS	NS	NS	NS	NS	NS
48229	gametophyte development (GO:0048229)	NS	NS	NS	NS	NS	NS	NS	NS	0.0319	NS	NS	NS	NS	NS	NS	NS	NS	NS	NS	NS	NS	NS	NS	NS	NS	NS	NS	NS	NS	NS
50687	negative regulation of defense response to virus (GO:0050687)	NS	NS	NS	NS	NS	NS	NS	0.0486	NS	NS	NS	NS	NS	NS	NS	NS	NS	NS	NS	NS	NS	NS	NS	NS	NS	NS	NS	NS	NS	NS
140352	export from cell (GO:0140352)	NS	NS	NS	NS	NS	0.00683	NS	NS	NS	0.0298	NS	NS	NS	NS	NS	NS	NS	NS	NS	NS	NS	NS	NS	NS	NS	NS	NS	NS	NS	NS
32504	multicellular organism reproduction (GO:0032504)	NS	NS	NS	NS	NS	NS	0.0167	0.0343	NS	NS	NS	NS	NS	NS	NS	NS	NS	NS	NS	NS	NS	NS	NS	NS	NS	NS	NS	NS	NS	NS
71941	nitrogen cycle metabolic process (GO:0071941)	NS	NS	NS	NS	NS	NS	NS	0.0266	NS	NS	NS	NS	NS	NS	NS	NS	NS	NS	NS	NS	NS	NS	NS	NS	NS	NS	NS	NS	NS	NS
10557	positive regulation of macromolecule biosynthetic process (GO:0010557)	NS	NS	NS	NS	NS	0.016	NS	NS	NS	NS	NS	NS	NS	NS	NS	NS	NS	NS	NS	NS	NS	NS	NS	NS	NS	NS	NS	NS	NS	NS
1990961	xenobiotic detoxification by transmembrane export across the plasma membrane (GO:1990961)	NS	NS	NS	NS	NS	0.038	NS	NS	NS	0.00433	NS	NS	NS	NS	NS	NS	NS	NS	NS	NS	NS	NS	NS	NS	NS	NS	NS	NS	NS	NS
47484	regulation of response to osmotic stress (GO:0047484)	NS	NS	NS	NS	NS	0.0161	NS	NS	NS	NS	NS	NS	NS	NS	NS	NS	NS	NS	NS	NS	NS	NS	NS	NS	NS	NS	NS	NS	NS	NS
42128	nitrate assimilation (GO:0042128)	NS	NS	NS	NS	NS	NS	NS	0.0108	NS	NS	NS	NS	NS	NS	NS	NS	NS	NS	NS	NS	NS	NS	NS	NS	NS	NS	NS	NS	NS	NS
33212	iron import into cell (GO:0033212)	NS	NS	NS	NS	NS	NS	NS	0.0488	NS	NS	NS	NS	NS	NS	NS	NS	NS	NS	NS	NS	NS	NS	NS	NS	NS	NS	NS	NS	NS	NS
35966	response to topologically incorrect protein (GO:0035966)	NS	NS	NS	NS	NS	NS	NS	NS	0.00481	NS	NS	NS	NS	NS	NS	NS	NS	NS	NS	NS	NS	NS	NS	NS	NS	NS	NS	NS	NS	NS
72350	tricarboxylic acid metabolic process (GO:0072350)	NS	NS	NS	NS	NS	NS	NS	0.0064	NS	NS	NS	NS	NS	NS	NS	NS	NS	NS	NS	NS	NS	NS	NS	NS	NS	NS	NS	NS	NS	NS
19320	hexose catabolic process (GO:0019320)	NS	NS	NS	NS	NS	NS	NS	NS	NS	0.011	NS	NS	NS	NS	NS	NS	NS	NS	NS	NS	NS	NS	NS	NS	NS	NS	NS	NS	NS	NS
10100	negative regulation of photomorphogenesis (GO:0010100)	NS	NS	NS	NS	NS	0.0312	NS	0.0216	0.0282	NS	NS	NS	NS	NS	NS	NS	NS	NS	NS	NS	NS	NS	NS	NS	NS	NS	NS	NS	NS	NS
42126	nitrate metabolic process (GO:0042126)	NS	NS	NS	NS	NS	NS	NS	0.0108	NS	NS	NS	NS	NS	NS	NS	NS	NS	NS	NS	NS	NS	NS	NS	NS	NS	NS	NS	NS	NS	NS
1902930	regulation of alcohol biosynthetic process (GO:1902930)	NS	NS	NS	NS	NS	0.0437	NS	NS	NS	NS	NS	NS	NS	NS	NS	NS	NS	NS	NS	NS	NS	NS	NS	NS	NS	NS	NS	NS	NS	NS
9051	pentose-phosphate shunt, oxidative branch (GO:0009051)	NS	NS	NS	NS	NS	NS	NS	0.0139	NS	NS	NS	NS	NS	NS	NS	NS	NS	NS	NS	NS	NS	NS	NS	NS	NS	NS	NS	NS	NS	NS
1903825	organic acid transmembrane transport (GO:1903825)	NS	NS	NS	NS	NS	NS	NS	0.018	NS	NS	NS	NS	NS	NS	NS	NS	NS	NS	NS	NS	NS	NS	NS	NS	NS	NS	NS	NS	NS	NS
46618	xenobiotic export from cell (GO:0046618)	NS	NS	NS	NS	NS	0.0379	NS	NS	NS	0.00429	NS	NS	NS	NS	NS	NS	NS	NS	NS	NS	NS	NS	NS	NS	NS	NS	NS	NS	NS	NS
61572	actin filament bundle organization (GO:0061572)	NS	NS	NS	NS	NS	NS	NS	NS	NS	NS	NS	NS	NS	NS	NS	NS	NS	NS	NS	NS	NS	NS	NS	NS	NS	NS	0.0385	NS	NS	NS
9612	response to mechanical stimulus (GO:0009612)	NS	NS	NS	NS	NS	NS	NS	NS	NS	NS	NS	NS	NS	NS	NS	NS	NS	NS	NS	NS	NS	NS	NS	NS	NS	NS	NS	0.017	NS	NS
9218	pyrimidine ribonucleotide metabolic process (GO:0009218)	NS	NS	NS	NS	NS	NS	NS	NS	NS	NS	NS	NS	NS	NS	NS	NS	NS	NS	NS	NS	NS	NS	NS	NS	NS	0.05	NS	NS	NS	NS
9584	detection of visible light (GO:0009584)	NS	NS	NS	NS	NS	NS	NS	NS	NS	NS	NS	NS	NS	NS	NS	NS	NS	NS	NS	NS	NS	NS	NS	NS	NS	NS	NS	0.00707	NS	NS
10255	glucose mediated signaling pathway (GO:0010255)	NS	NS	NS	NS	NS	NS	NS	NS	NS	NS	NS	NS	NS	NS	NS	NS	NS	NS	NS	NS	NS	NS	NS	NS	NS	NS	NS	0.0255	NS	NS
51093	negative regulation of developmental process (GO:0051093)	NS	NS	NS	NS	NS	NS	NS	NS	NS	NS	NS	NS	NS	NS	NS	NS	NS	NS	NS	NS	NS	NS	NS	NS	NS	NS	0.0367	NS	NS	NS
1900425	negative regulation of defense response to bacterium (GO:1900425)	NS	NS	NS	NS	NS	NS	NS	NS	NS	NS	NS	NS	NS	NS	NS	NS	NS	NS	NS	NS	NS	NS	NS	NS	NS	NS	NS	0.0132	NS	NS
48581	negative regulation of post-embryonic development (GO:0048581)	NS	NS	NS	NS	NS	NS	NS	NS	NS	NS	NS	NS	NS	NS	NS	NS	NS	NS	NS	NS	NS	NS	NS	NS	NS	NS	0.0463	NS	NS	NS
9970	cellular response to sulfate starvation (GO:0009970)	NS	NS	NS	NS	NS	NS	NS	NS	NS	NS	NS	NS	NS	NS	NS	NS	NS	NS	NS	NS	NS	NS	NS	NS	NS	0.0122	NS	NS	0.0366	NS
46173	polyol biosynthetic process (GO:0046173)	NS	NS	NS	NS	NS	NS	NS	NS	NS	NS	NS	NS	NS	NS	NS	NS	NS	NS	NS	NS	NS	NS	NS	NS	NS	NS	NS	NS	0.00838	NS
10082	regulation of root meristem growth (GO:0010082)	NS	NS	NS	NS	NS	NS	NS	NS	NS	NS	NS	NS	NS	NS	NS	NS	NS	NS	NS	NS	NS	NS	NS	NS	NS	NS	0.0385	NS	NS	NS
52386	cell wall thickening (GO:0052386)	NS	NS	NS	NS	NS	NS	NS	NS	NS	NS	NS	NS	NS	NS	NS	NS	NS	NS	NS	NS	NS	NS	NS	NS	NS	0.0321	NS	0.012	NS	NS
19751	polyol metabolic process (GO:0019751)	NS	NS	NS	NS	NS	NS	NS	NS	NS	NS	NS	NS	NS	NS	NS	NS	NS	NS	NS	NS	NS	NS	NS	NS	NS	NS	NS	0.0253	0.0271	NS
9220	pyrimidine ribonucleotide biosynthetic process (GO:0009220)	NS	NS	NS	NS	NS	NS	NS	NS	NS	NS	NS	NS	NS	NS	NS	NS	NS	NS	NS	NS	NS	NS	NS	NS	NS	0.05	NS	NS	NS	NS
10115	regulation of abscisic acid biosynthetic process (GO:0010115)	NS	NS	NS	NS	NS	NS	NS	NS	NS	NS	NS	NS	NS	NS	NS	NS	NS	NS	NS	NS	NS	NS	NS	NS	NS	0.04	NS	NS	NS	NS
1900056	negative regulation of leaf senescence (GO:1900056)	NS	NS	NS	NS	NS	NS	NS	NS	NS	NS	NS	NS	NS	NS	NS	NS	NS	NS	NS	NS	NS	NS	NS	NS	NS	0.0415	NS	NS	NS	NS
31330	negative regulation of cellular catabolic process (GO:0031330)	NS	NS	NS	NS	NS	NS	NS	NS	NS	NS	NS	NS	NS	NS	NS	NS	NS	NS	NS	NS	NS	NS	NS	NS	NS	0.0207	NS	NS	NS	NS
30656	regulation of vitamin metabolic process (GO:0030656)	NS	NS	NS	NS	NS	NS	NS	NS	NS	NS	NS	NS	NS	NS	NS	NS	NS	NS	NS	NS	NS	NS	NS	NS	NS	NS	NS	NS	NS	0.036
97164	ammonium ion metabolic process (GO:0097164)	NS	NS	NS	NS	NS	NS	NS	NS	NS	NS	NS	NS	NS	NS	NS	NS	NS	NS	NS	NS	NS	NS	NS	NS	NS	NS	0.0449	NS	NS	NS
6367	transcription initiation at RNA polymerase II promoter (GO:0006367)	NS	NS	NS	NS	NS	NS	NS	NS	NS	NS	NS	NS	NS	NS	NS	NS	NS	NS	NS	NS	NS	NS	NS	NS	NS	NS	NS	0.0161	NS	NS
9937	regulation of gibberellic acid mediated signaling pathway (GO:0009937)	NS	NS	NS	NS	NS	NS	NS	NS	NS	NS	NS	NS	NS	NS	NS	NS	NS	NS	NS	NS	NS	NS	NS	NS	NS	NS	0.0239	NS	NS	NS
6352	DNA-templated transcription initiation (GO:0006352)	NS	NS	NS	NS	NS	NS	NS	NS	NS	NS	NS	NS	NS	NS	NS	NS	NS	NS	NS	NS	NS	NS	NS	NS	NS	NS	NS	0.0154	NS	NS
6888	endoplasmic reticulum to Golgi vesicle-mediated transport (GO:0006888)	NS	NS	NS	NS	NS	NS	NS	NS	NS	NS	NS	NS	NS	NS	NS	NS	NS	NS	NS	NS	NS	NS	NS	NS	NS	NS	NS	NS	0.0282	NS
10039	response to iron ion (GO:0010039)	NS	NS	NS	NS	NS	NS	NS	NS	NS	NS	NS	NS	NS	NS	NS	NS	NS	NS	NS	NS	NS	NS	NS	NS	NS	NS	NS	NS	NS	0.0285
70897	transcription preinitiation complex assembly (GO:0070897)	NS	NS	NS	NS	NS	NS	NS	NS	NS	NS	NS	NS	NS	NS	NS	NS	NS	NS	NS	NS	NS	NS	NS	NS	NS	NS	NS	0.0284	NS	NS
42178	xenobiotic catabolic process (GO:0042178)	NS	NS	NS	NS	NS	NS	NS	NS	NS	NS	NS	NS	NS	NS	NS	NS	NS	NS	NS	NS	NS	NS	NS	NS	NS	NS	NS	NS	NS	0.0404
10628	positive regulation of gene expression (GO:0010628)	NS	NS	NS	NS	NS	NS	NS	NS	NS	NS	NS	NS	NS	NS	NS	NS	NS	NS	NS	NS	NS	NS	NS	NS	NS	0.035	0.0112	NS	NS	NS
6644	phospholipid metabolic process (GO:0006644)	NS	NS	NS	NS	NS	NS	NS	NS	NS	NS	NS	NS	NS	NS	NS	NS	NS	NS	NS	NS	NS	NS	NS	NS	NS	0.00447	NS	0.0414	NS	NS
15976	carbon utilization (GO:0015976)	NS	NS	NS	NS	NS	NS	NS	NS	NS	NS	NS	NS	NS	NS	NS	NS	NS	NS	NS	NS	NS	NS	NS	NS	NS	NS	0.0156	NS	NS	NS
32922	circadian regulation of gene expression (GO:0032922)	NS	NS	NS	NS	NS	NS	NS	NS	NS	NS	NS	NS	NS	NS	NS	NS	NS	NS	NS	NS	NS	NS	NS	NS	NS	0.0164	0.00824	0.0136	NS	NS
51761	sesquiterpene metabolic process (GO:0051761)	NS	NS	NS	NS	NS	NS	NS	NS	NS	NS	NS	NS	NS	NS	NS	NS	NS	NS	NS	NS	NS	NS	NS	NS	NS	NS	NS	0.0284	NS	NS
9684	indoleacetic acid biosynthetic process (GO:0009684)	NS	NS	NS	NS	NS	NS	NS	NS	NS	NS	NS	NS	NS	NS	NS	NS	NS	NS	NS	NS	NS	NS	NS	NS	NS	0.0404	NS	NS	NS	NS
10187	negative regulation of seed germination (GO:0010187)	NS	NS	NS	NS	NS	NS	NS	NS	NS	NS	NS	NS	NS	NS	NS	NS	NS	NS	NS	NS	NS	NS	NS	NS	NS	NS	0.0111	NS	NS	0.0414
1904585	response to putrescine (GO:1904585)	NS	NS	NS	NS	NS	NS	NS	NS	NS	NS	NS	NS	NS	NS	NS	NS	NS	NS	NS	NS	NS	NS	NS	NS	NS	NS	NS	NS	NS	0.0406
51762	sesquiterpene biosynthetic process (GO:0051762)	NS	NS	NS	NS	NS	NS	NS	NS	NS	NS	NS	NS	NS	NS	NS	NS	NS	NS	NS	NS	NS	NS	NS	NS	NS	NS	NS	0.0432	NS	NS
55074	calcium ion homeostasis (GO:0055074)	NS	NS	NS	NS	NS	NS	NS	NS	NS	NS	NS	NS	NS	NS	NS	NS	NS	NS	NS	NS	NS	NS	NS	NS	NS	NS	0.00716	NS	NS	NS
6109	regulation of carbohydrate metabolic process (GO:0006109)	NS	NS	NS	NS	NS	NS	NS	NS	NS	NS	NS	NS	NS	NS	NS	NS	NS	NS	NS	NS	NS	NS	NS	NS	NS	NS	0.0433	NS	NS	NS
51017	actin filament bundle assembly (GO:0051017)	NS	NS	NS	NS	NS	NS	NS	NS	NS	NS	NS	NS	NS	NS	NS	NS	NS	NS	NS	NS	NS	NS	NS	NS	NS	NS	0.0384	NS	NS	NS
52543	callose deposition in cell wall (GO:0052543)	NS	NS	NS	NS	NS	NS	NS	NS	NS	NS	NS	NS	NS	NS	NS	NS	NS	NS	NS	NS	NS	NS	NS	NS	NS	0.0353	NS	0.0294	NS	NS
110126	phloem loading (GO:0110126)	NS	NS	NS	NS	NS	NS	NS	NS	NS	NS	NS	NS	NS	NS	NS	NS	NS	NS	NS	NS	NS	NS	NS	NS	NS	NS	0.00155	NS	NS	NS
19374	galactolipid metabolic process (GO:0019374)	NS	NS	NS	NS	NS	NS	NS	NS	NS	NS	NS	NS	NS	NS	NS	NS	NS	NS	NS	NS	NS	NS	NS	NS	NS	NS	NS	0.018	NS	NS
16559	peroxisome fission (GO:0016559)	NS	NS	NS	NS	NS	NS	NS	NS	NS	NS	NS	NS	NS	NS	NS	NS	NS	NS	NS	NS	NS	NS	NS	NS	NS	NS	0.00827	NS	NS	NS
10075	regulation of meristem growth (GO:0010075)	NS	NS	NS	NS	NS	NS	NS	NS	NS	NS	NS	NS	NS	NS	NS	NS	NS	NS	NS	NS	NS	NS	NS	NS	NS	NS	0.0335	NS	NS	NS
31022	nuclear migration along microfilament (GO:0031022)	NS	NS	NS	NS	NS	NS	NS	NS	NS	NS	NS	NS	NS	NS	NS	NS	NS	NS	NS	NS	NS	NS	NS	NS	NS	0.0287	0.0193	NS	NS	NS
460	maturation of 5.8S rRNA (GO:0000460)	NS	NS	NS	NS	NS	NS	NS	NS	NS	NS	NS	NS	NS	NS	NS	NS	NS	NS	NS	NS	NS	NS	NS	NS	NS	NS	NS	0.045	NS	NS
10118	stomatal movement (GO:0010118)	NS	NS	NS	NS	NS	NS	NS	NS	NS	NS	NS	NS	NS	NS	NS	NS	NS	NS	NS	NS	NS	NS	NS	NS	NS	0.00635	NS	NS	0.00864	0.0133
1901332	negative regulation of lateral root development (GO:1901332)	NS	NS	NS	NS	NS	NS	NS	NS	NS	NS	NS	NS	NS	NS	NS	NS	NS	NS	NS	NS	NS	NS	NS	NS	NS	NS	NS	0.0455	NS	NS
48571	long-day photoperiodism (GO:0048571)	NS	NS	NS	NS	NS	NS	NS	NS	NS	NS	NS	NS	NS	NS	NS	NS	NS	NS	NS	NS	NS	NS	NS	NS	NS	NS	NS	0.0487	NS	NS
51050	positive regulation of transport (GO:0051050)	NS	NS	NS	NS	NS	NS	NS	NS	NS	NS	NS	NS	NS	NS	NS	NS	NS	NS	NS	NS	NS	NS	NS	NS	NS	NS	NS	0.0237	NS	NS
2000904	regulation of starch metabolic process (GO:2000904)	NS	NS	NS	NS	NS	NS	NS	NS	NS	NS	NS	NS	NS	NS	NS	NS	NS	NS	NS	NS	NS	NS	NS	NS	NS	NS	0.0403	NS	NS	NS
18958	phenol-containing compound metabolic process (GO:0018958)	NS	NS	NS	NS	NS	NS	NS	NS	NS	NS	NS	NS	NS	NS	NS	NS	NS	NS	NS	NS	NS	NS	NS	NS	NS	NS	NS	NS	0.00262	NS
19375	galactolipid biosynthetic process (GO:0019375)	NS	NS	NS	NS	NS	NS	NS	NS	NS	NS	NS	NS	NS	NS	NS	NS	NS	NS	NS	NS	NS	NS	NS	NS	NS	NS	NS	0.00536	NS	NS
6570	tyrosine metabolic process (GO:0006570)	NS	NS	NS	NS	NS	NS	NS	NS	NS	NS	NS	NS	NS	NS	NS	NS	NS	NS	NS	NS	NS	NS	NS	NS	NS	NS	NS	NS	0.0111	NS
45937	positive regulation of phosphate metabolic process (GO:0045937)	NS	NS	NS	NS	NS	NS	NS	NS	NS	NS	NS	NS	NS	NS	NS	NS	NS	NS	NS	NS	NS	NS	NS	NS	NS	NS	NS	0.0178	NS	NS
51090	regulation of DNA-binding transcription factor activity (GO:0051090)	NS	NS	NS	NS	NS	NS	NS	NS	NS	NS	NS	NS	NS	NS	NS	NS	NS	NS	NS	NS	NS	NS	NS	NS	NS	0.00311	NS	NS	0.0374	NS
6816	calcium ion transport (GO:0006816)	NS	NS	NS	NS	NS	NS	NS	NS	NS	NS	NS	NS	NS	NS	NS	NS	NS	NS	NS	NS	NS	NS	NS	NS	NS	NS	0.0273	NS	NS	NS
10562	positive regulation of phosphorus metabolic process (GO:0010562)	NS	NS	NS	NS	NS	NS	NS	NS	NS	NS	NS	NS	NS	NS	NS	NS	NS	NS	NS	NS	NS	NS	NS	NS	NS	NS	NS	0.0179	NS	NS
10087	phloem or xylem histogenesis (GO:0010087)	NS	NS	NS	NS	NS	NS	NS	NS	NS	NS	NS	NS	NS	NS	NS	NS	NS	NS	NS	NS	NS	NS	NS	NS	NS	NS	NS	0.00718	NS	NS
43068	positive regulation of programmed cell death (GO:0043068)	NS	NS	NS	NS	NS	NS	NS	NS	NS	NS	NS	0.0269	NS	NS	NS	NS	NS	NS	NS	NS	NS	NS	NS	NS	NS	NS	NS	NS	NS	NS
6858	extracellular transport (GO:0006858)	NS	NS	NS	NS	NS	NS	NS	NS	NS	NS	NS	0.0469	NS	NS	NS	NS	NS	NS	NS	NS	NS	NS	NS	NS	NS	NS	NS	NS	NS	NS
51056	regulation of small GTPase mediated signal transduction (GO:0051056)	NS	NS	NS	NS	NS	NS	NS	NS	NS	NS	0.0046	NS	NS	NS	NS	NS	NS	NS	NS	NS	NS	NS	NS	NS	NS	0.0213	NS	NS	NS	NS
18171	peptidyl-cysteine oxidation (GO:0018171)	NS	NS	NS	NS	NS	NS	NS	NS	NS	NS	NS	NS	0.0108	0.041	0.0226	NS	NS	NS	NS	NS	NS	NS	NS	NS	NS	NS	NS	NS	NS	NS
43270	positive regulation of monoatomic ion transport (GO:0043270)	NS	NS	NS	NS	NS	NS	NS	NS	NS	NS	0.0492	NS	0.0504	NS	NS	NS	NS	NS	NS	NS	NS	NS	NS	NS	NS	NS	NS	0.00835	NS	NS
31329	regulation of cellular catabolic process (GO:0031329)	NS	NS	NS	NS	NS	NS	NS	NS	NS	NS	0.016	NS	NS	NS	NS	NS	NS	NS	NS	NS	NS	NS	NS	NS	NS	0.0406	NS	NS	NS	NS
60776	simple leaf morphogenesis (GO:0060776)	NS	NS	NS	NS	NS	NS	NS	NS	NS	NS	NS	NS	NS	0.0404	NS	NS	NS	NS	NS	NS	NS	NS	NS	NS	NS	NS	NS	NS	NS	NS
48364	root development (GO:0048364)	NS	NS	NS	NS	NS	NS	NS	NS	NS	NS	0.00134	NS	NS	NS	NS	NS	NS	NS	NS	NS	NS	NS	NS	NS	NS	NS	NS	0.0231	NS	NS
50829	defense response to Gram-negative bacterium (GO:0050829)	NS	NS	NS	NS	NS	NS	NS	NS	NS	NS	NS	NS	0.0311	NS	NS	NS	NS	NS	NS	NS	NS	NS	NS	NS	NS	NS	NS	NS	NS	NS
6508	proteolysis (GO:0006508)	NS	NS	NS	NS	NS	NS	NS	NS	NS	NS	0.000295	2.4e-05	0.00246	0.00294	NS	NS	NS	NS	NS	NS	NS	NS	NS	NS	NS	NS	NS	NS	NS	NS
10506	regulation of autophagy (GO:0010506)	NS	NS	NS	NS	NS	NS	NS	NS	NS	NS	0.023	NS	NS	NS	NS	NS	NS	NS	NS	NS	NS	NS	NS	NS	NS	0.0414	NS	0.0343	NS	NS
48586	regulation of long-day photoperiodism, flowering (GO:0048586)	NS	NS	NS	NS	NS	NS	NS	NS	NS	NS	NS	0.0381	NS	NS	NS	NS	NS	NS	NS	NS	NS	NS	NS	NS	NS	NS	NS	NS	NS	NS
9133	nucleoside diphosphate biosynthetic process (GO:0009133)	NS	NS	NS	NS	NS	NS	NS	NS	NS	NS	0.0261	NS	NS	NS	NS	NS	NS	NS	NS	NS	NS	NS	NS	NS	NS	0.03	NS	NS	NS	NS
15031	protein transport (GO:0015031)	0.0325	NS	NS	NS	NS	NS	NS	0.0378	NS	NS	0.000396	NS	NS	NS	NS	NS	NS	NS	0.042	NS	0.00524	0.0202	0.000113	NS	NS	NS	NS	NS	NS	NS
46113	nucleobase catabolic process (GO:0046113)	NS	NS	NS	NS	NS	NS	NS	NS	NS	NS	NS	NS	0.0339	NS	NS	NS	NS	NS	NS	NS	NS	NS	NS	NS	NS	NS	NS	NS	NS	NS
72522	purine-containing compound biosynthetic process (GO:0072522)	NS	NS	NS	NS	NS	NS	NS	NS	NS	NS	0.0267	NS	NS	NS	NS	NS	0.0118	0.0105	NS	NS	NS	NS	NS	NS	NS	NS	NS	NS	NS	NS
1900367	positive regulation of defense response to insect (GO:1900367)	NS	NS	NS	NS	NS	NS	NS	NS	NS	NS	NS	NS	0.0499	NS	NS	NS	NS	NS	NS	NS	NS	NS	NS	NS	NS	NS	NS	NS	NS	NS
9152	purine ribonucleotide biosynthetic process (GO:0009152)	NS	NS	NS	NS	NS	NS	NS	NS	NS	NS	0.0429	NS	NS	NS	NS	NS	0.00354	0.00536	NS	NS	NS	NS	NS	NS	NS	NS	NS	NS	NS	NS
10015	root morphogenesis (GO:0010015)	NS	NS	NS	NS	NS	NS	NS	NS	NS	NS	0.00152	NS	NS	NS	NS	NS	NS	NS	NS	NS	NS	NS	NS	NS	NS	NS	NS	NS	NS	NS
48578	positive regulation of long-day photoperiodism, flowering (GO:0048578)	NS	NS	NS	NS	NS	NS	NS	NS	NS	NS	NS	0.023	NS	NS	NS	NS	NS	NS	NS	NS	NS	NS	NS	NS	NS	NS	NS	NS	NS	NS
42344	indole glucosinolate catabolic process (GO:0042344)	NS	NS	NS	NS	NS	NS	NS	NS	NS	NS	NS	NS	0.0109	NS	NS	NS	NS	NS	NS	NS	NS	NS	NS	NS	NS	NS	NS	NS	NS	NS
9682	induced systemic resistance (GO:0009682)	NS	NS	NS	NS	NS	NS	NS	NS	NS	NS	NS	NS	0.0233	NS	NS	NS	NS	NS	NS	NS	NS	NS	NS	NS	NS	NS	NS	NS	NS	NS
71211	protein targeting to vacuole involved in autophagy (GO:0071211)	NS	NS	NS	NS	NS	NS	NS	NS	NS	NS	NS	NS	NS	NS	0.0498	NS	NS	NS	NS	NS	NS	NS	NS	NS	NS	NS	NS	NS	NS	NS
50658	RNA transport (GO:0050658)	NS	NS	NS	NS	NS	NS	NS	NS	NS	NS	0.00498	NS	NS	NS	NS	NS	NS	NS	NS	NS	NS	NS	NS	NS	NS	NS	NS	NS	NS	NS
7164	establishment of tissue polarity (GO:0007164)	NS	NS	NS	NS	NS	NS	NS	NS	NS	NS	NS	0.0468	NS	0.0204	NS	NS	NS	NS	NS	NS	NS	NS	NS	NS	NS	NS	NS	NS	NS	NS
6892	post-Golgi vesicle-mediated transport (GO:0006892)	NS	NS	NS	NS	NS	NS	NS	NS	NS	NS	0.028	NS	NS	NS	NS	NS	NS	NS	NS	NS	NS	NS	NS	NS	NS	NS	NS	NS	NS	NS
31648	protein destabilization (GO:0031648)	NS	NS	NS	NS	NS	NS	NS	NS	NS	NS	NS	0.0463	NS	NS	NS	NS	NS	NS	NS	NS	NS	NS	NS	NS	NS	NS	NS	NS	NS	NS
6405	RNA export from nucleus (GO:0006405)	NS	NS	NS	NS	NS	NS	NS	NS	NS	NS	0.00229	NS	NS	NS	NS	NS	NS	NS	NS	NS	NS	NS	NS	NS	NS	NS	NS	NS	NS	NS
2238	response to molecule of fungal origin (GO:0002238)	NS	NS	NS	NS	NS	NS	NS	NS	NS	NS	NS	NS	0.0172	NS	NS	NS	NS	NS	NS	NS	NS	NS	NS	NS	NS	NS	NS	NS	NS	NS
120009	intermembrane lipid transfer (GO:0120009)	NS	NS	NS	NS	NS	NS	NS	NS	NS	NS	NS	NS	0.0108	NS	NS	NS	NS	NS	NS	NS	NS	NS	NS	NS	NS	NS	NS	NS	NS	NS
43328	protein transport to vacuole involved in ubiquitin-dependent protein catabolic process via the multivesicular body sorting pathway (GO:0043328)	NS	NS	NS	NS	NS	NS	NS	NS	NS	NS	NS	NS	NS	0.0408	NS	NS	NS	NS	NS	NS	NS	NS	NS	NS	NS	NS	NS	NS	NS	NS
51170	import into nucleus (GO:0051170)	NS	NS	NS	NS	NS	NS	NS	NS	NS	NS	0.00132	NS	NS	NS	NS	NS	NS	NS	NS	NS	NS	NS	NS	NS	NS	NS	NS	NS	NS	NS
44804	nucleophagy (GO:0044804)	NS	NS	NS	NS	NS	NS	NS	NS	NS	NS	NS	0.00551	NS	NS	NS	NS	NS	NS	NS	NS	NS	NS	NS	NS	NS	NS	NS	NS	NS	NS
30242	autophagy of peroxisome (GO:0030242)	NS	NS	NS	NS	NS	NS	NS	NS	NS	NS	NS	0.0142	0.0199	NS	NS	NS	NS	NS	NS	NS	NS	NS	NS	NS	NS	NS	NS	NS	NS	NS
31117	positive regulation of microtubule depolymerization (GO:0031117)	NS	NS	NS	NS	NS	NS	NS	NS	NS	NS	NS	NS	NS	NS	0.05	NS	NS	NS	NS	NS	NS	NS	NS	NS	NS	NS	NS	NS	NS	NS
43161	proteasome-mediated ubiquitin-dependent protein catabolic process (GO:0043161)	NS	NS	NS	NS	NS	NS	NS	NS	NS	NS	NS	0.0421	NS	NS	NS	NS	NS	NS	NS	NS	NS	NS	NS	NS	NS	NS	NS	NS	NS	NS
40007	growth (GO:0040007)	NS	NS	NS	NS	NS	NS	NS	NS	NS	NS	0.00507	NS	NS	NS	NS	NS	NS	NS	NS	NS	NS	NS	NS	NS	NS	NS	NS	NS	NS	NS
51176	positive regulation of sulfur metabolic process (GO:0051176)	NS	NS	NS	NS	NS	NS	NS	NS	NS	NS	NS	NS	NS	0.0415	NS	NS	NS	NS	NS	NS	NS	NS	NS	NS	NS	NS	NS	NS	NS	NS
10629	negative regulation of gene expression (GO:0010629)	NS	NS	NS	NS	NS	NS	NS	NS	NS	NS	0.00373	NS	NS	NS	NS	NS	NS	NS	NS	NS	NS	NS	NS	NS	NS	NS	NS	NS	NS	NS
16311	dephosphorylation (GO:0016311)	NS	NS	NS	NS	NS	NS	NS	NS	NS	NS	NS	NS	0.0387	NS	NS	NS	NS	NS	NS	NS	NS	NS	NS	NS	NS	NS	NS	NS	NS	NS
60560	developmental growth involved in morphogenesis (GO:0060560)	NS	NS	NS	NS	NS	NS	NS	NS	NS	NS	0.0454	NS	NS	NS	NS	NS	NS	NS	NS	NS	NS	NS	NS	NS	NS	NS	NS	NS	NS	NS
6906	vesicle fusion (GO:0006906)	NS	NS	NS	NS	NS	NS	NS	NS	NS	NS	NS	NS	0.0168	NS	NS	NS	NS	NS	NS	NS	NS	NS	NS	NS	NS	NS	NS	NS	NS	NS
9861	jasmonic acid and ethylene-dependent systemic resistance (GO:0009861)	NS	NS	NS	NS	NS	NS	NS	NS	NS	NS	NS	NS	0.02	NS	NS	NS	NS	NS	NS	NS	NS	NS	NS	NS	NS	NS	NS	NS	NS	NS
6497	protein lipidation (GO:0006497)	NS	NS	NS	NS	NS	NS	NS	NS	NS	NS	0.0431	NS	NS	NS	NS	NS	NS	NS	NS	NS	NS	NS	NS	NS	NS	NS	NS	NS	NS	NS
43543	protein acylation (GO:0043543)	NS	NS	NS	NS	NS	NS	NS	NS	NS	NS	0.0402	NS	NS	NS	NS	NS	NS	NS	NS	NS	NS	NS	NS	NS	NS	NS	NS	NS	NS	NS
62013	positive regulation of small molecule metabolic process (GO:0062013)	NS	NS	NS	NS	NS	NS	NS	NS	NS	NS	0.0465	NS	NS	NS	NS	NS	NS	NS	NS	NS	NS	NS	NS	NS	NS	NS	NS	NS	NS	NS
10383	cell wall polysaccharide metabolic process (GO:0010383)	NS	NS	NS	NS	NS	NS	NS	NS	NS	NS	NS	NS	NS	0.0057	0.00107	NS	NS	NS	NS	NS	NS	NS	NS	NS	NS	NS	NS	NS	NS	NS
10498	proteasomal protein catabolic process (GO:0010498)	NS	NS	NS	NS	NS	NS	NS	NS	NS	NS	NS	0.00577	NS	NS	NS	NS	NS	NS	NS	NS	NS	NS	NS	NS	NS	NS	NS	NS	NS	NS
10101	post-embryonic root morphogenesis (GO:0010101)	NS	NS	NS	NS	NS	NS	NS	NS	NS	NS	0.0142	NS	NS	NS	NS	NS	NS	NS	NS	NS	NS	NS	NS	NS	NS	NS	NS	NS	NS	NS
6672	ceramide metabolic process (GO:0006672)	NS	NS	NS	NS	NS	NS	NS	NS	NS	NS	NS	0.0439	0.00644	NS	NS	NS	NS	NS	NS	NS	NS	NS	NS	NS	NS	NS	NS	NS	NS	NS
43484	regulation of RNA splicing (GO:0043484)	NS	NS	NS	NS	NS	NS	NS	NS	NS	NS	0.0429	NS	NS	NS	NS	NS	NS	NS	NS	NS	NS	NS	NS	NS	NS	NS	NS	NS	NS	NS
42886	amide transport (GO:0042886)	NS	NS	NS	NS	NS	NS	NS	NS	NS	NS	NS	0.0159	0.036	NS	NS	NS	NS	NS	NS	NS	NS	NS	NS	NS	NS	NS	NS	NS	NS	NS
16050	vesicle organization (GO:0016050)	NS	NS	NS	NS	NS	NS	NS	NS	NS	NS	0.00455	0.00113	0.000399	0.00671	NS	NS	NS	NS	NS	NS	NS	NS	NS	NS	NS	NS	NS	NS	NS	NS
6536	glutamate metabolic process (GO:0006536)	NS	NS	NS	NS	NS	NS	NS	NS	NS	NS	NS	0.0438	NS	NS	NS	NS	NS	NS	NS	NS	NS	NS	NS	NS	NS	NS	NS	NS	NS	NS
32511	late endosome to vacuole transport via multivesicular body sorting pathway (GO:0032511)	NS	NS	NS	NS	NS	NS	NS	NS	NS	NS	NS	NS	0.00642	NS	NS	NS	NS	NS	NS	NS	NS	NS	NS	NS	NS	NS	NS	NS	NS	NS
55080	monoatomic cation homeostasis (GO:0055080)	NS	NS	NS	NS	NS	NS	NS	NS	NS	NS	NS	0.0342	NS	NS	NS	NS	NS	NS	NS	NS	NS	NS	NS	NS	NS	NS	NS	NS	NS	NS
45927	positive regulation of growth (GO:0045927)	NS	NS	NS	NS	NS	NS	NS	NS	NS	NS	0.0458	NS	NS	NS	NS	NS	NS	NS	NS	NS	NS	NS	NS	NS	NS	NS	NS	NS	NS	NS
10271	regulation of chlorophyll catabolic process (GO:0010271)	NS	NS	NS	NS	NS	NS	NS	NS	NS	NS	0.026	NS	NS	NS	NS	NS	NS	NS	NS	NS	NS	NS	NS	NS	NS	NS	NS	NS	NS	NS
9068	aspartate family amino acid catabolic process (GO:0009068)	NS	NS	NS	NS	NS	NS	NS	NS	NS	NS	NS	NS	0.05	NS	NS	NS	NS	NS	NS	NS	NS	NS	NS	NS	NS	NS	NS	NS	NS	NS
32509	endosome transport via multivesicular body sorting pathway (GO:0032509)	NS	NS	NS	NS	NS	NS	NS	NS	NS	NS	NS	NS	0.0143	NS	NS	NS	NS	NS	NS	NS	NS	NS	NS	NS	NS	NS	NS	NS	NS	NS
70189	kynurenine metabolic process (GO:0070189)	NS	NS	NS	NS	NS	NS	NS	NS	NS	NS	NS	0.00841	NS	NS	NS	NS	NS	NS	NS	NS	NS	NS	NS	NS	NS	NS	NS	NS	NS	NS
1900368	regulation of post-transcriptional gene silencing by regulatory ncRNA (GO:1900368)	NS	NS	NS	NS	NS	NS	NS	NS	NS	NS	NS	0.0467	NS	NS	NS	NS	NS	NS	NS	NS	NS	NS	NS	NS	NS	NS	NS	NS	NS	NS
46513	ceramide biosynthetic process (GO:0046513)	NS	NS	NS	NS	NS	NS	NS	NS	NS	NS	NS	NS	0.0475	NS	NS	NS	NS	NS	NS	NS	NS	NS	NS	NS	NS	NS	NS	NS	NS	NS
42158	lipoprotein biosynthetic process (GO:0042158)	NS	NS	NS	NS	NS	NS	NS	NS	NS	NS	0.043	NS	NS	NS	NS	NS	NS	NS	NS	NS	NS	NS	NS	NS	NS	NS	NS	NS	NS	NS
22406	membrane docking (GO:0022406)	NS	NS	NS	NS	NS	NS	NS	NS	NS	NS	NS	0.00642	3.82e-05	NS	NS	NS	NS	NS	NS	NS	NS	NS	NS	NS	NS	NS	NS	NS	NS	NS
16237	microautophagy (GO:0016237)	NS	NS	NS	NS	NS	NS	NS	NS	NS	NS	NS	0.00548	NS	NS	NS	NS	NS	NS	NS	NS	NS	NS	NS	NS	NS	NS	NS	NS	NS	NS
71370	cellular response to gibberellin stimulus (GO:0071370)	NS	NS	NS	NS	NS	NS	NS	NS	NS	NS	NS	0.0163	NS	NS	NS	NS	NS	NS	NS	NS	NS	NS	NS	NS	NS	NS	NS	NS	NS	NS
6403	RNA localization (GO:0006403)	NS	NS	NS	NS	NS	NS	NS	NS	NS	NS	0.00732	NS	NS	NS	NS	NS	NS	NS	NS	NS	NS	NS	NS	NS	NS	NS	NS	NS	NS	NS
90158	endoplasmic reticulum membrane organization (GO:0090158)	NS	NS	NS	NS	NS	NS	NS	NS	NS	NS	NS	0.0207	0.0329	NS	NS	NS	NS	NS	NS	NS	NS	NS	NS	NS	NS	NS	NS	NS	NS	NS
51236	establishment of RNA localization (GO:0051236)	NS	NS	NS	NS	NS	NS	NS	NS	NS	NS	0.005	NS	NS	NS	NS	NS	NS	NS	NS	NS	NS	NS	NS	NS	NS	NS	NS	NS	NS	NS
48278	vesicle docking (GO:0048278)	NS	NS	NS	NS	NS	NS	NS	NS	NS	NS	NS	NS	0.0336	NS	NS	NS	NS	NS	NS	NS	NS	NS	NS	NS	NS	NS	NS	NS	NS	NS
48589	developmental growth (GO:0048589)	NS	NS	NS	NS	NS	NS	NS	NS	NS	NS	0.021	NS	NS	NS	NS	NS	NS	NS	NS	NS	NS	NS	NS	NS	NS	NS	NS	NS	NS	NS
9851	auxin biosynthetic process (GO:0009851)	NS	NS	NS	NS	NS	NS	NS	NS	NS	NS	0.0294	NS	NS	NS	NS	NS	NS	NS	NS	NS	NS	NS	NS	NS	NS	NS	NS	NS	NS	NS
51346	negative regulation of hydrolase activity (GO:0051346)	NS	NS	NS	NS	NS	NS	NS	NS	NS	NS	0.011	NS	NS	NS	NS	NS	NS	NS	NS	NS	NS	NS	NS	NS	NS	NS	NS	NS	NS	NS
45324	late endosome to vacuole transport (GO:0045324)	NS	NS	NS	NS	NS	NS	NS	NS	NS	NS	NS	NS	0.00641	NS	NS	NS	NS	NS	NS	NS	NS	NS	NS	NS	NS	NS	NS	NS	NS	NS
43162	ubiquitin-dependent protein catabolic process via the multivesicular body sorting pathway (GO:0043162)	NS	NS	NS	NS	NS	NS	NS	NS	NS	NS	NS	NS	0.0387	NS	NS	NS	NS	NS	NS	NS	NS	NS	NS	NS	NS	NS	NS	NS	NS	NS
43067	regulation of programmed cell death (GO:0043067)	NS	NS	NS	NS	NS	NS	NS	NS	NS	NS	NS	0.00998	0.00279	NS	NS	NS	NS	NS	NS	NS	NS	NS	NS	NS	NS	NS	NS	NS	NS	NS
90549	response to carbon starvation (GO:0090549)	NS	NS	NS	NS	NS	NS	NS	NS	NS	NS	NS	NS	NS	0.0411	0.0228	NS	NS	NS	NS	NS	NS	NS	NS	NS	NS	NS	NS	NS	NS	NS
423	mitophagy (GO:0000423)	NS	NS	NS	NS	NS	NS	NS	NS	NS	NS	0.0203	NS	NS	NS	NS	NS	NS	NS	NS	NS	NS	NS	NS	NS	NS	NS	NS	NS	NS	NS
48638	regulation of developmental growth (GO:0048638)	NS	NS	NS	NS	NS	NS	NS	NS	NS	NS	0.0243	NS	NS	NS	NS	NS	NS	NS	NS	NS	NS	NS	NS	NS	NS	NS	NS	NS	NS	NS
1900457	regulation of brassinosteroid mediated signaling pathway (GO:1900457)	NS	NS	NS	NS	NS	NS	NS	NS	NS	NS	NS	NS	0.00775	NS	NS	NS	NS	NS	NS	NS	NS	NS	NS	NS	NS	NS	NS	NS	NS	NS
6606	protein import into nucleus (GO:0006606)	NS	NS	NS	NS	NS	NS	NS	NS	NS	NS	0.00672	NS	NS	NS	NS	NS	NS	NS	NS	NS	NS	NS	NS	NS	NS	NS	NS	NS	NS	NS
35627	ceramide transport (GO:0035627)	NS	NS	NS	NS	NS	NS	NS	NS	NS	NS	NS	NS	0.0109	NS	NS	NS	NS	NS	NS	NS	NS	NS	NS	NS	NS	NS	NS	NS	NS	NS
10508	positive regulation of autophagy (GO:0010508)	NS	NS	NS	NS	NS	NS	NS	NS	NS	NS	NS	NS	0.0199	NS	NS	NS	NS	NS	NS	NS	NS	NS	NS	NS	NS	NS	NS	NS	NS	NS
9413	response to flooding (GO:0009413)	NS	NS	NS	NS	NS	NS	NS	NS	NS	NS	NS	0.0363	NS	NS	NS	NS	NS	NS	NS	NS	NS	NS	NS	NS	NS	NS	NS	NS	NS	NS
31331	positive regulation of cellular catabolic process (GO:0031331)	NS	NS	NS	NS	NS	NS	NS	NS	NS	NS	NS	0.0407	NS	NS	NS	NS	NS	NS	NS	NS	NS	NS	NS	NS	NS	NS	NS	NS	NS	NS
1901881	positive regulation of protein depolymerization (GO:1901881)	NS	NS	NS	NS	NS	NS	NS	NS	NS	NS	NS	NS	NS	NS	0.0495	NS	NS	NS	NS	NS	NS	NS	NS	NS	NS	NS	NS	NS	NS	NS
10604	positive regulation of macromolecule metabolic process (GO:0010604)	NS	NS	NS	NS	NS	NS	NS	NS	NS	NS	NS	0.0304	NS	NS	NS	NS	NS	NS	NS	NS	NS	NS	NS	NS	NS	NS	NS	NS	NS	NS
34504	protein localization to nucleus (GO:0034504)	NS	NS	NS	NS	NS	NS	NS	NS	NS	NS	0.00227	NS	NS	NS	NS	NS	NS	NS	NS	NS	NS	NS	NS	NS	NS	NS	NS	NS	NS	NS
51169	nuclear transport (GO:0051169)	NS	NS	NS	NS	NS	NS	NS	NS	NS	NS	0.00412	NS	NS	NS	NS	NS	NS	NS	NS	NS	NS	NS	NS	NS	NS	NS	NS	NS	NS	NS
35196	miRNA processing (GO:0035196)	NS	NS	NS	NS	NS	NS	NS	NS	NS	NS	0.0389	NS	NS	NS	NS	NS	NS	NS	NS	NS	NS	NS	NS	NS	NS	NS	NS	NS	NS	NS
9606	tropism (GO:0009606)	NS	NS	NS	NS	NS	NS	NS	NS	NS	NS	0.0257	NS	NS	NS	NS	NS	NS	NS	NS	NS	NS	NS	NS	NS	NS	NS	NS	NS	NS	NS
44036	cell wall macromolecule metabolic process (GO:0044036)	NS	NS	NS	NS	NS	NS	NS	NS	NS	NS	NS	NS	NS	0.0375	0.0065	NS	NS	NS	NS	NS	NS	NS	NS	NS	NS	NS	NS	NS	NS	NS
50801	monoatomic ion homeostasis (GO:0050801)	NS	NS	NS	NS	NS	NS	NS	NS	NS	NS	NS	0.0253	NS	NS	NS	NS	NS	NS	NS	NS	NS	NS	NS	NS	NS	NS	NS	NS	NS	NS
46740	transport of virus in host, cell to cell (GO:0046740)	NS	NS	NS	NS	NS	NS	NS	NS	NS	NS	NS	0.0466	NS	0.0203	NS	NS	NS	NS	NS	NS	NS	NS	NS	NS	NS	NS	NS	NS	NS	NS
1901404	regulation of tetrapyrrole catabolic process (GO:1901404)	NS	NS	NS	NS	NS	NS	NS	NS	NS	NS	0.0259	NS	NS	NS	NS	NS	NS	NS	NS	NS	NS	NS	NS	NS	NS	NS	NS	NS	NS	NS
10102	lateral root morphogenesis (GO:0010102)	NS	NS	NS	NS	NS	NS	NS	NS	NS	NS	0.0126	NS	NS	NS	NS	NS	NS	NS	NS	NS	NS	NS	NS	NS	NS	NS	NS	NS	NS	NS
90174	organelle membrane fusion (GO:0090174)	NS	NS	NS	NS	NS	NS	NS	NS	NS	NS	NS	NS	0.0497	NS	NS	NS	NS	NS	NS	NS	NS	NS	NS	NS	NS	NS	NS	NS	NS	NS
18158	protein oxidation (GO:0018158)	NS	NS	NS	NS	NS	NS	NS	NS	NS	NS	NS	NS	0.0108	0.0408	0.0225	NS	NS	NS	NS	NS	NS	NS	NS	NS	NS	NS	NS	NS	NS	NS
140056	organelle localization by membrane tethering (GO:0140056)	NS	NS	NS	NS	NS	NS	NS	NS	NS	NS	NS	0.00647	3.84e-05	NS	NS	NS	NS	NS	NS	NS	NS	NS	NS	NS	NS	NS	NS	NS	NS	NS
50657	nucleic acid transport (GO:0050657)	NS	NS	NS	NS	NS	NS	NS	NS	NS	NS	0.00496	NS	NS	NS	NS	NS	NS	NS	NS	NS	NS	NS	NS	NS	NS	NS	NS	NS	NS	NS
16197	endosomal transport (GO:0016197)	NS	NS	NS	NS	NS	NS	NS	NS	NS	NS	0.0425	NS	NS	NS	NS	NS	NS	NS	NS	NS	NS	NS	NS	NS	NS	NS	NS	NS	NS	NS
7166	cell surface receptor signaling pathway (GO:0007166)	NS	NS	NS	NS	NS	NS	NS	NS	NS	NS	NS	NS	0.0111	NS	NS	NS	NS	NS	NS	NS	NS	NS	NS	NS	NS	NS	NS	NS	NS	NS
31086	nuclear-transcribed mRNA catabolic process, deadenylation-independent decay (GO:0031086)	NS	NS	NS	NS	NS	NS	NS	NS	NS	NS	0.0489	NS	NS	NS	NS	NS	NS	NS	NS	NS	NS	NS	NS	NS	NS	NS	NS	NS	NS	NS
16032	viral process (GO:0016032)	NS	NS	NS	NS	NS	NS	NS	NS	NS	NS	NS	NS	NS	0.0497	NS	NS	NS	NS	NS	NS	NS	NS	NS	NS	NS	NS	NS	NS	NS	NS
10104	regulation of ethylene-activated signaling pathway (GO:0010104)	NS	NS	NS	NS	NS	NS	NS	NS	NS	NS	0.0183	NS	NS	0.0428	0.0486	NS	NS	NS	NS	NS	NS	NS	NS	NS	NS	NS	NS	NS	NS	NS
97352	autophagosome maturation (GO:0097352)	NS	NS	NS	NS	NS	NS	NS	NS	NS	NS	NS	NS	0.033	NS	NS	NS	NS	NS	NS	NS	NS	NS	NS	NS	NS	NS	NS	NS	NS	NS
6913	nucleocytoplasmic transport (GO:0006913)	NS	NS	NS	NS	NS	NS	NS	NS	NS	NS	0.0041	NS	NS	NS	NS	NS	NS	NS	NS	NS	NS	NS	NS	NS	NS	NS	NS	NS	NS	NS
34727	piecemeal microautophagy of the nucleus (GO:0034727)	NS	NS	NS	NS	NS	NS	NS	NS	NS	NS	NS	0.00546	NS	NS	NS	NS	NS	NS	NS	NS	NS	NS	NS	NS	NS	NS	NS	NS	NS	NS
52545	callose localization (GO:0052545)	NS	NS	NS	NS	NS	NS	NS	NS	NS	NS	NS	NS	0.0359	NS	NS	NS	NS	NS	NS	NS	NS	NS	NS	NS	NS	NS	NS	NS	NS	NS
6448	regulation of translational elongation (GO:0006448)	NS	NS	NS	NS	NS	NS	NS	NS	NS	NS	NS	NS	NS	NS	0.0229	NS	NS	NS	NS	NS	NS	NS	NS	NS	NS	NS	NS	NS	NS	NS
51336	regulation of hydrolase activity (GO:0051336)	NS	NS	NS	NS	NS	NS	NS	NS	NS	NS	0.0262	NS	NS	NS	NS	NS	NS	NS	NS	NS	NS	NS	NS	NS	NS	NS	NS	NS	NS	NS
60149	negative regulation of post-transcriptional gene silencing (GO:0060149)	NS	NS	NS	NS	NS	NS	NS	NS	NS	NS	0.011	NS	NS	NS	NS	NS	NS	NS	NS	NS	NS	NS	NS	NS	NS	NS	NS	NS	NS	NS
6900	vesicle budding from membrane (GO:0006900)	NS	NS	NS	NS	NS	NS	NS	NS	NS	NS	0.00291	0.00361	NS	0.0161	NS	NS	NS	NS	NS	NS	NS	NS	NS	NS	NS	NS	NS	NS	NS	NS
51513	regulation of monopolar cell growth (GO:0051513)	NS	NS	NS	NS	NS	NS	NS	NS	NS	NS	NS	NS	NS	0.0407	0.0224	NS	NS	NS	NS	NS	NS	NS	NS	NS	NS	NS	NS	NS	NS	NS
71472	cellular response to salt stress (GO:0071472)	NS	NS	NS	NS	NS	NS	NS	NS	NS	NS	NS	0.0157	NS	NS	NS	NS	NS	NS	NS	NS	NS	NS	NS	NS	NS	NS	NS	NS	NS	NS
2000241	regulation of reproductive process (GO:2000241)	NS	NS	NS	NS	NS	NS	NS	NS	NS	NS	0.00757	NS	NS	0.0181	NS	NS	NS	NS	NS	NS	NS	NS	NS	NS	NS	NS	NS	NS	NS	NS
2000243	positive regulation of reproductive process (GO:2000243)	NS	NS	NS	NS	NS	NS	NS	NS	NS	NS	0.0107	0.0249	NS	0.00585	NS	NS	NS	NS	NS	NS	NS	NS	NS	NS	NS	NS	NS	NS	NS	NS
19441	tryptophan catabolic process to kynurenine (GO:0019441)	NS	NS	NS	NS	NS	NS	NS	NS	NS	NS	NS	0.00845	NS	NS	NS	NS	NS	NS	NS	NS	NS	NS	NS	NS	NS	NS	NS	NS	NS	NS
21700	developmental maturation (GO:0021700)	NS	NS	NS	NS	NS	NS	NS	NS	NS	NS	0.0434	NS	NS	NS	NS	NS	NS	NS	NS	NS	NS	NS	NS	NS	NS	NS	NS	NS	NS	NS
71985	multivesicular body sorting pathway (GO:0071985)	NS	NS	NS	NS	NS	NS	NS	NS	NS	NS	NS	NS	0.0142	NS	NS	NS	NS	NS	NS	NS	NS	NS	NS	NS	NS	NS	NS	NS	NS	NS
72708	response to sorbitol (GO:0072708)	NS	NS	NS	NS	NS	NS	NS	NS	NS	NS	NS	NS	NS	NS	0.0223	NS	NS	NS	NS	NS	NS	NS	NS	NS	NS	NS	NS	NS	NS	NS
6623	protein targeting to vacuole (GO:0006623)	NS	NS	NS	NS	NS	NS	NS	NS	NS	NS	0.00307	NS	0.00331	0.0125	NS	NS	NS	NS	NS	NS	NS	NS	NS	NS	NS	NS	NS	NS	NS	NS
31087	deadenylation-independent decapping of nuclear-transcribed mRNA (GO:0031087)	NS	NS	NS	NS	NS	NS	NS	NS	NS	NS	0.049	NS	NS	NS	NS	NS	NS	NS	NS	NS	NS	NS	NS	NS	NS	NS	NS	NS	NS	NS
70297	regulation of phosphorelay signal transduction system (GO:0070297)	NS	NS	NS	NS	NS	NS	NS	NS	NS	NS	0.0184	NS	NS	0.0429	0.0489	NS	NS	NS	NS	NS	NS	NS	NS	NS	NS	NS	NS	NS	NS	NS
18198	peptidyl-cysteine modification (GO:0018198)	NS	NS	NS	NS	NS	NS	NS	NS	NS	NS	0.011	NS	NS	NS	NS	NS	NS	NS	NS	NS	NS	NS	NS	NS	NS	NS	NS	NS	NS	NS
22616	DNA strand elongation (GO:0022616)	NS	NS	NS	NS	NS	NS	NS	NS	NS	NS	NS	NS	NS	NS	NS	NS	NS	0.0174	NS	NS	NS	NS	NS	NS	NS	NS	NS	NS	NS	NS
6575	cellular modified amino acid metabolic process (GO:0006575)	NS	NS	NS	NS	NS	NS	NS	NS	NS	0.00132	NS	NS	NS	NS	NS	0.00393	NS	NS	NS	NS	0.0164	NS	NS	NS	0.00596	NS	NS	NS	NS	NS
85	mitotic G2 phase (GO:0000085)	NS	NS	NS	NS	NS	NS	NS	NS	NS	NS	NS	NS	NS	NS	NS	NS	NS	NS	NS	0.0452	NS	NS	NS	NS	NS	NS	NS	NS	NS	NS
51310	metaphase chromosome alignment (GO:0051310)	NS	NS	NS	NS	NS	NS	NS	NS	NS	NS	NS	NS	NS	NS	NS	NS	0.0358	NS	NS	NS	NS	NS	NS	NS	NS	NS	NS	NS	NS	NS
43413	macromolecule glycosylation (GO:0043413)	NS	NS	NS	NS	NS	NS	NS	NS	NS	NS	NS	NS	NS	NS	NS	NS	NS	0.0458	NS	NS	NS	NS	NS	NS	NS	NS	NS	NS	NS	NS
9072	aromatic amino acid metabolic process (GO:0009072)	NS	NS	NS	NS	NS	0.00169	NS	NS	NS	NS	NS	NS	NS	NS	NS	0.0495	NS	NS	NS	NS	0.000905	NS	NS	NS	NS	NS	NS	NS	NS	NS
44773	mitotic DNA damage checkpoint signaling (GO:0044773)	NS	NS	NS	NS	NS	NS	NS	NS	NS	NS	NS	NS	NS	NS	NS	NS	NS	0.0424	NS	NS	NS	NS	NS	NS	NS	NS	NS	NS	NS	NS
71229	cellular response to acid chemical (GO:0071229)	NS	NS	NS	NS	NS	NS	NS	NS	NS	NS	NS	NS	NS	NS	NS	0.0307	NS	NS	NS	NS	NS	NS	NS	NS	0.0381	0.0276	NS	NS	NS	NS
9934	regulation of meristem structural organization (GO:0009934)	NS	NS	NS	NS	NS	NS	NS	NS	NS	NS	NS	NS	NS	NS	NS	NS	NS	0.0203	NS	NS	NS	NS	NS	NS	NS	NS	NS	NS	NS	NS
6188	IMP biosynthetic process (GO:0006188)	NS	NS	NS	NS	NS	NS	NS	NS	NS	NS	NS	NS	NS	NS	NS	NS	0.0412	NS	NS	NS	NS	NS	NS	NS	NS	NS	NS	NS	NS	NS
10028	xanthophyll cycle (GO:0010028)	NS	NS	NS	NS	NS	NS	NS	NS	NS	NS	NS	NS	NS	NS	NS	NS	0.0158	0.0167	NS	NS	NS	NS	NS	NS	NS	NS	NS	NS	NS	NS
90143	nucleoid organization (GO:0090143)	NS	NS	NS	NS	NS	NS	NS	NS	NS	NS	NS	NS	NS	NS	NS	NS	0.0459	0.0466	NS	NS	NS	NS	NS	NS	NS	NS	NS	NS	NS	NS
15711	organic anion transport (GO:0015711)	NS	NS	NS	NS	NS	NS	NS	NS	NS	NS	NS	NS	NS	NS	NS	0.0116	NS	NS	NS	NS	NS	NS	0.0394	NS	NS	NS	NS	0.0302	NS	NS
80175	phragmoplast microtubule organization (GO:0080175)	NS	NS	NS	NS	NS	NS	NS	NS	NS	NS	NS	NS	NS	NS	NS	NS	NS	0.00929	NS	0.0183	NS	NS	NS	NS	NS	NS	NS	NS	NS	NS
725	recombinational repair (GO:0000725)	NS	NS	NS	NS	NS	NS	NS	NS	NS	NS	NS	NS	NS	NS	NS	NS	0.0377	0.000258	NS	NS	NS	NS	NS	NS	NS	NS	NS	NS	NS	NS
6551	leucine metabolic process (GO:0006551)	NS	NS	NS	0.0311	NS	NS	NS	NS	NS	NS	NS	NS	NS	NS	NS	0.0463	NS	NS	NS	NS	NS	NS	NS	NS	NS	0.00262	0.0119	NS	0.00308	NS
62197	cellular response to chemical stress (GO:0062197)	NS	NS	NS	NS	NS	0.0392	NS	NS	NS	NS	NS	NS	NS	NS	NS	0.00746	NS	NS	NS	NS	NS	NS	NS	NS	NS	0.0163	0.00503	NS	NS	NS
1901991	negative regulation of mitotic cell cycle phase transition (GO:1901991)	NS	NS	NS	NS	NS	NS	NS	NS	NS	NS	NS	NS	NS	NS	NS	NS	NS	0.000955	NS	NS	NS	NS	NS	NS	NS	NS	NS	NS	NS	NS
9902	chloroplast relocation (GO:0009902)	NS	NS	NS	NS	NS	NS	NS	NS	NS	NS	NS	NS	NS	NS	NS	NS	0.0341	0.0169	NS	0.032	NS	NS	NS	NS	NS	NS	NS	NS	NS	NS
16119	carotene metabolic process (GO:0016119)	NS	NS	NS	NS	NS	NS	NS	NS	NS	NS	NS	NS	NS	NS	NS	0.00223	NS	0.00153	0.00511	NS	NS	NS	NS	NS	NS	NS	NS	NS	NS	NS
30865	cortical cytoskeleton organization (GO:0030865)	NS	NS	NS	NS	NS	NS	NS	NS	NS	NS	NS	NS	NS	NS	NS	NS	NS	0.0285	NS	NS	NS	NS	NS	NS	NS	NS	NS	NS	NS	NS
19750	chloroplast localization (GO:0019750)	NS	NS	NS	NS	NS	NS	NS	NS	NS	NS	NS	NS	NS	NS	NS	NS	0.0297	0.00508	NS	NS	NS	NS	NS	NS	NS	NS	NS	NS	NS	NS
48507	meristem development (GO:0048507)	NS	NS	NS	NS	NS	NS	NS	NS	NS	NS	NS	NS	NS	NS	NS	NS	NS	0.026	NS	NS	NS	NS	NS	NS	NS	NS	NS	NS	NS	NS
10196	nonphotochemical quenching (GO:0010196)	NS	NS	NS	NS	NS	0.0314	NS	NS	0.0284	NS	NS	NS	NS	NS	NS	0.00047	NS	NS	NS	NS	NS	NS	NS	NS	NS	0.00924	NS	NS	NS	NS
51129	negative regulation of cellular component organization (GO:0051129)	NS	NS	NS	NS	NS	NS	NS	NS	NS	NS	NS	NS	NS	NS	NS	NS	NS	0.0159	NS	NS	NS	NS	NS	NS	NS	NS	NS	NS	NS	NS
10338	leaf formation (GO:0010338)	NS	NS	NS	NS	NS	NS	NS	NS	NS	NS	NS	NS	NS	NS	NS	NS	0.0456	NS	NS	NS	NS	NS	NS	NS	NS	NS	NS	NS	NS	NS
6486	protein glycosylation (GO:0006486)	NS	NS	NS	NS	NS	NS	NS	NS	NS	NS	NS	NS	NS	NS	NS	NS	NS	0.0458	NS	NS	NS	NS	NS	NS	NS	NS	NS	NS	NS	NS
1990066	energy quenching (GO:1990066)	NS	NS	NS	NS	NS	0.0315	NS	NS	0.0287	NS	NS	NS	NS	NS	NS	0.000472	NS	NS	NS	NS	NS	NS	NS	NS	NS	0.00927	NS	NS	NS	NS
80	mitotic G1 phase (GO:0000080)	NS	NS	NS	NS	NS	NS	NS	NS	NS	NS	NS	NS	NS	NS	NS	NS	NS	NS	NS	0.0447	NS	NS	NS	NS	NS	NS	NS	NS	NS	NS
51639	actin filament network formation (GO:0051639)	NS	NS	NS	NS	NS	NS	NS	NS	NS	NS	NS	NS	NS	NS	NS	NS	0.00807	NS	NS	NS	NS	NS	NS	NS	NS	NS	NS	NS	NS	NS
31399	regulation of protein modification process (GO:0031399)	NS	NS	NS	NS	NS	NS	NS	NS	NS	NS	NS	NS	NS	NS	NS	NS	NS	0.000942	NS	0.00578	NS	NS	NS	NS	NS	NS	NS	NS	NS	NS
7112	male meiosis cytokinesis (GO:0007112)	NS	NS	NS	NS	NS	NS	NS	NS	NS	NS	NS	NS	NS	NS	NS	NS	NS	0.0212	NS	0.0332	NS	NS	NS	NS	NS	NS	NS	NS	NS	NS
84	mitotic S phase (GO:0000084)	NS	NS	NS	NS	NS	NS	NS	NS	NS	NS	NS	NS	NS	NS	NS	NS	NS	NS	NS	0.0449	NS	NS	NS	NS	NS	NS	NS	NS	NS	NS
51318	G1 phase (GO:0051318)	NS	NS	NS	NS	NS	NS	NS	NS	NS	NS	NS	NS	NS	NS	NS	NS	NS	NS	NS	0.0435	NS	NS	NS	NS	NS	NS	NS	NS	NS	NS
6275	regulation of DNA replication (GO:0006275)	NS	NS	NS	NS	NS	NS	NS	NS	NS	NS	NS	NS	NS	NS	NS	NS	0.000368	0.00304	NS	NS	NS	NS	NS	NS	NS	NS	NS	NS	NS	NS
51315	attachment of mitotic spindle microtubules to kinetochore (GO:0051315)	NS	NS	NS	NS	NS	NS	NS	NS	NS	NS	NS	NS	NS	NS	NS	NS	0.008	NS	NS	NS	NS	NS	NS	NS	NS	NS	NS	NS	NS	NS
3006	developmental process involved in reproduction (GO:0003006)	NS	NS	NS	NS	NS	NS	NS	NS	NS	NS	NS	NS	NS	NS	NS	NS	NS	0.000609	NS	NS	NS	NS	NS	NS	NS	NS	NS	NS	NS	NS
48629	trichome patterning (GO:0048629)	NS	NS	NS	NS	NS	NS	NS	NS	NS	NS	NS	NS	NS	NS	NS	NS	NS	0.0395	NS	NS	NS	NS	NS	NS	NS	NS	NS	NS	NS	NS
5983	starch catabolic process (GO:0005983)	NS	NS	NS	NS	NS	0.0394	NS	NS	NS	NS	NS	NS	NS	NS	NS	0.000111	NS	NS	NS	NS	NS	NS	NS	NS	NS	0.000675	NS	NS	NS	NS
10119	regulation of stomatal movement (GO:0010119)	NS	NS	NS	NS	NS	NS	NS	NS	NS	NS	NS	0.0113	3.37e-05	0.042	NS	0.0342	NS	NS	NS	NS	NS	NS	NS	NS	NS	0.00274	6.1e-05	5.08e-06	0.0133	NS
46112	nucleobase biosynthetic process (GO:0046112)	NS	NS	NS	NS	NS	NS	NS	NS	NS	NS	NS	NS	NS	NS	NS	NS	0.0177	0.0265	NS	NS	NS	NS	NS	NS	NS	NS	NS	NS	NS	NS
34758	positive regulation of iron ion transport (GO:0034758)	NS	NS	NS	NS	NS	NS	NS	NS	NS	NS	NS	NS	NS	NS	NS	NS	NS	NS	NS	0.0442	NS	NS	NS	NS	NS	NS	NS	NS	NS	NS
10342	endosperm cellularization (GO:0010342)	NS	NS	NS	NS	NS	NS	NS	NS	NS	NS	NS	NS	NS	NS	NS	NS	NS	0.0166	NS	NS	NS	NS	NS	NS	NS	NS	NS	NS	NS	NS
19379	sulfate assimilation, phosphoadenylyl sulfate reduction by phosphoadenylyl-sulfate reductase (thioredoxin) (GO:0019379)	NS	NS	NS	NS	NS	NS	NS	0.0484	0.0187	NS	NS	NS	NS	NS	NS	0.0214	NS	NS	NS	NS	NS	NS	NS	NS	NS	NS	NS	NS	NS	NS
45935	positive regulation of nucleobase-containing compound metabolic process (GO:0045935)	NS	NS	NS	NS	NS	0.0449	NS	NS	NS	NS	NS	NS	NS	NS	NS	0.0289	NS	NS	NS	NS	NS	NS	NS	NS	NS	NS	NS	NS	NS	NS
90307	mitotic spindle assembly (GO:0090307)	NS	NS	NS	NS	NS	NS	NS	NS	NS	NS	NS	NS	NS	NS	NS	NS	0.00566	0.0082	NS	0.00755	NS	NS	NS	NS	NS	NS	NS	NS	NS	NS
51775	response to redox state (GO:0051775)	NS	NS	NS	NS	NS	NS	NS	NS	NS	NS	NS	NS	NS	NS	NS	NS	NS	0.0397	NS	NS	NS	NS	NS	NS	NS	NS	NS	NS	NS	NS
6302	double-strand break repair (GO:0006302)	NS	NS	NS	NS	NS	NS	NS	NS	NS	NS	NS	NS	NS	NS	NS	NS	NS	0.000631	NS	NS	NS	NS	NS	NS	NS	NS	NS	NS	NS	NS
80051	cutin transport (GO:0080051)	NS	NS	NS	NS	NS	NS	NS	NS	NS	NS	NS	NS	NS	NS	NS	NS	NS	0.0165	NS	NS	NS	NS	NS	NS	NS	NS	NS	NS	NS	NS
10051	xylem and phloem pattern formation (GO:0010051)	NS	NS	NS	NS	NS	NS	NS	NS	NS	NS	NS	NS	NS	NS	NS	NS	NS	0.00212	NS	NS	NS	NS	NS	NS	NS	NS	NS	NS	NS	NS
9201	ribonucleoside triphosphate biosynthetic process (GO:0009201)	NS	NS	NS	NS	NS	NS	NS	NS	NS	NS	NS	NS	NS	NS	NS	NS	0.0288	NS	NS	NS	NS	NS	NS	NS	NS	NS	NS	NS	NS	NS
51320	S phase (GO:0051320)	NS	NS	NS	NS	NS	NS	NS	NS	NS	NS	NS	NS	NS	NS	NS	NS	NS	NS	NS	0.0437	NS	NS	NS	NS	NS	NS	NS	NS	NS	NS
10965	regulation of mitotic sister chromatid separation (GO:0010965)	NS	NS	NS	NS	NS	NS	NS	NS	NS	NS	NS	NS	NS	NS	NS	NS	NS	0.0175	NS	NS	NS	NS	NS	NS	NS	NS	NS	NS	NS	NS
9100	glycoprotein metabolic process (GO:0009100)	NS	NS	NS	NS	NS	NS	NS	NS	NS	NS	NS	NS	NS	NS	NS	NS	NS	0.0173	NS	NS	NS	NS	NS	NS	NS	NS	NS	NS	NS	NS
90626	plant epidermis morphogenesis (GO:0090626)	NS	NS	NS	NS	NS	NS	NS	NS	NS	NS	NS	NS	NS	NS	NS	NS	NS	0.000416	NS	NS	NS	NS	NS	NS	NS	NS	NS	NS	NS	NS
6221	pyrimidine nucleotide biosynthetic process (GO:0006221)	NS	NS	NS	NS	NS	NS	NS	NS	NS	NS	NS	NS	NS	NS	NS	0.0367	NS	NS	NS	NS	NS	NS	NS	NS	NS	0.0142	NS	NS	NS	NS
31542	positive regulation of anthocyanin biosynthetic process (GO:0031542)	NS	NS	NS	NS	NS	NS	NS	NS	NS	NS	NS	NS	NS	NS	NS	NS	NS	0.0464	NS	NS	NS	NS	NS	NS	NS	NS	NS	NS	NS	NS
1901990	regulation of mitotic cell cycle phase transition (GO:1901990)	NS	NS	NS	NS	NS	NS	NS	NS	NS	NS	NS	NS	NS	NS	NS	NS	NS	0.000293	NS	NS	NS	NS	NS	NS	NS	NS	NS	NS	NS	NS
48825	cotyledon development (GO:0048825)	NS	NS	NS	NS	NS	NS	NS	NS	NS	NS	NS	NS	NS	NS	NS	NS	NS	0.00777	NS	NS	NS	NS	NS	NS	NS	NS	NS	NS	NS	NS
8654	phospholipid biosynthetic process (GO:0008654)	NS	NS	NS	NS	NS	NS	NS	NS	NS	NS	NS	NS	NS	NS	NS	0.0177	NS	NS	NS	NS	NS	NS	NS	NS	NS	0.0151	NS	NS	NS	NS
6220	pyrimidine nucleotide metabolic process (GO:0006220)	NS	NS	NS	NS	NS	NS	NS	NS	NS	NS	NS	NS	NS	NS	NS	0.0367	NS	NS	NS	NS	NS	NS	NS	NS	NS	0.0142	NS	NS	NS	NS
9113	purine nucleobase biosynthetic process (GO:0009113)	NS	NS	NS	NS	NS	NS	NS	NS	NS	NS	NS	NS	NS	NS	NS	NS	0.0358	NS	NS	NS	NS	NS	NS	NS	NS	NS	NS	NS	NS	NS
43446	cellular alkane metabolic process (GO:0043446)	NS	NS	NS	NS	NS	NS	NS	NS	NS	NS	NS	NS	NS	NS	NS	0.012	NS	NS	NS	NS	NS	NS	NS	NS	NS	0.0082	NS	NS	NS	NS
45944	positive regulation of transcription by RNA polymerase II (GO:0045944)	NS	NS	NS	NS	NS	NS	NS	NS	NS	NS	NS	NS	NS	NS	NS	0.0329	NS	NS	NS	NS	NS	NS	NS	NS	NS	0.0439	0.0109	NS	NS	NS
7276	gamete generation (GO:0007276)	NS	NS	NS	NS	NS	NS	NS	NS	NS	NS	NS	NS	NS	NS	NS	NS	NS	0.0351	NS	0.0295	NS	NS	NS	NS	NS	NS	NS	NS	NS	NS
10091	trichome branching (GO:0010091)	NS	NS	NS	NS	NS	NS	NS	NS	NS	NS	NS	NS	NS	NS	NS	NS	NS	0.0169	NS	NS	NS	NS	NS	NS	NS	NS	NS	NS	NS	NS
51225	spindle assembly (GO:0051225)	NS	NS	NS	NS	NS	NS	NS	NS	NS	NS	NS	NS	NS	NS	NS	NS	0.0128	0.000946	NS	0.000826	NS	NS	NS	NS	NS	NS	NS	NS	NS	NS
32465	regulation of cytokinesis (GO:0032465)	NS	NS	NS	NS	NS	NS	NS	NS	NS	NS	NS	NS	NS	NS	NS	NS	NS	NS	0.0356	NS	NS	NS	NS	NS	NS	NS	NS	NS	NS	NS
72593	reactive oxygen species metabolic process (GO:0072593)	NS	NS	NS	NS	NS	NS	NS	NS	NS	NS	NS	NS	NS	NS	NS	0.011	NS	NS	NS	NS	NS	NS	NS	NS	NS	NS	NS	0.0433	NS	NS
140013	meiotic nuclear division (GO:0140013)	NS	NS	NS	NS	NS	NS	NS	NS	NS	NS	NS	NS	NS	NS	NS	NS	NS	0.000517	NS	0.000585	NS	NS	NS	NS	NS	NS	NS	NS	NS	NS
10440	stomatal lineage progression (GO:0010440)	NS	NS	NS	NS	NS	NS	NS	NS	NS	NS	NS	NS	NS	NS	NS	NS	NS	0.0262	NS	NS	NS	NS	NS	NS	NS	NS	NS	NS	NS	NS
6020	inositol metabolic process (GO:0006020)	NS	NS	NS	NS	NS	NS	NS	NS	NS	NS	NS	NS	NS	NS	NS	0.0256	NS	NS	NS	NS	NS	NS	NS	NS	NS	0.0297	NS	NS	NS	NS
76	DNA replication checkpoint signaling (GO:0000076)	NS	NS	NS	NS	NS	NS	NS	NS	NS	NS	NS	NS	NS	NS	NS	NS	NS	0.0124	NS	NS	NS	NS	NS	NS	NS	NS	NS	NS	NS	NS
31570	DNA integrity checkpoint signaling (GO:0031570)	NS	NS	NS	NS	NS	NS	NS	NS	NS	NS	NS	NS	NS	NS	NS	NS	NS	0.00585	NS	NS	NS	NS	NS	NS	NS	NS	NS	NS	NS	NS
51321	meiotic cell cycle (GO:0051321)	NS	NS	NS	NS	NS	NS	NS	NS	NS	NS	NS	NS	NS	NS	NS	NS	NS	1.05e-05	NS	0.000562	NS	NS	NS	NS	NS	NS	NS	NS	NS	NS
1902749	regulation of cell cycle G2/M phase transition (GO:1902749)	NS	NS	NS	NS	NS	NS	NS	NS	NS	NS	NS	NS	NS	NS	NS	NS	NS	0.00363	NS	NS	NS	NS	NS	NS	NS	NS	NS	NS	NS	NS
2000008	regulation of protein localization to cell surface (GO:2000008)	NS	NS	NS	NS	NS	NS	NS	NS	NS	NS	NS	NS	NS	NS	NS	0.0394	NS	NS	NS	NS	NS	NS	NS	NS	NS	0.000125	0.0268	0.000106	NS	NS
70370	cellular heat acclimation (GO:0070370)	NS	NS	NS	NS	NS	NS	NS	NS	NS	NS	NS	NS	NS	NS	NS	0.00996	NS	NS	NS	NS	NS	NS	NS	NS	NS	0.000997	NS	0.00672	NS	0.0248
71103	DNA conformation change (GO:0071103)	NS	NS	NS	NS	NS	NS	NS	NS	NS	NS	NS	NS	NS	NS	NS	NS	0.0177	0.00309	NS	NS	NS	NS	NS	NS	NS	NS	NS	NS	NS	NS
51168	nuclear export (GO:0051168)	NS	NS	NS	NS	NS	NS	NS	NS	NS	NS	0.0318	NS	NS	NS	NS	0.00689	NS	NS	NS	NS	NS	NS	NS	NS	NS	NS	NS	NS	NS	NS
33559	unsaturated fatty acid metabolic process (GO:0033559)	NS	NS	NS	NS	NS	NS	NS	NS	NS	NS	NS	NS	NS	NS	NS	0.0183	0.0304	0.0421	NS	0.011	NS	NS	NS	NS	NS	NS	NS	NS	NS	NS
31109	microtubule polymerization or depolymerization (GO:0031109)	NS	NS	NS	NS	NS	NS	NS	NS	NS	NS	NS	NS	NS	NS	NS	NS	NS	0.042	NS	NS	NS	NS	NS	NS	NS	NS	NS	NS	NS	NS
373	Group II intron splicing (GO:0000373)	NS	NS	NS	NS	NS	NS	NS	NS	NS	NS	NS	NS	NS	NS	NS	NS	0.0469	NS	NS	NS	NS	NS	NS	NS	NS	NS	NS	NS	NS	NS
19682	glyceraldehyde-3-phosphate metabolic process (GO:0019682)	NS	NS	NS	NS	NS	NS	NS	NS	NS	NS	NS	NS	NS	NS	NS	0.00495	NS	NS	NS	NS	NS	NS	NS	NS	NS	NS	NS	NS	NS	NS
6563	L-serine metabolic process (GO:0006563)	NS	NS	NS	NS	NS	NS	NS	NS	NS	NS	NS	NS	NS	NS	NS	NS	NS	NS	0.0125	NS	NS	NS	NS	NS	NS	NS	NS	NS	NS	NS
6108	malate metabolic process (GO:0006108)	NS	NS	NS	NS	NS	NS	NS	NS	NS	NS	NS	NS	NS	NS	NS	0.0336	NS	NS	NS	NS	NS	NS	NS	NS	NS	NS	NS	NS	NS	NS
8608	attachment of spindle microtubules to kinetochore (GO:0008608)	NS	NS	NS	NS	NS	NS	NS	NS	NS	NS	NS	NS	NS	NS	NS	NS	0.036	NS	NS	NS	NS	NS	NS	NS	NS	NS	NS	NS	NS	NS
43094	cellular metabolic compound salvage (GO:0043094)	NS	NS	NS	NS	NS	NS	NS	NS	NS	NS	NS	NS	NS	NS	NS	0.0362	NS	NS	NS	NS	NS	NS	NS	NS	NS	NS	NS	NS	NS	NS
7349	cellularization (GO:0007349)	NS	NS	NS	NS	NS	NS	NS	NS	NS	NS	NS	NS	NS	NS	NS	NS	NS	0.00946	NS	NS	NS	NS	NS	NS	NS	NS	NS	NS	NS	NS
30154	cell differentiation (GO:0030154)	NS	NS	NS	NS	NS	NS	NS	NS	NS	NS	NS	NS	NS	NS	NS	NS	NS	0.0288	NS	NS	NS	NS	NS	NS	NS	NS	NS	NS	NS	NS
97435	supramolecular fiber organization (GO:0097435)	NS	NS	NS	NS	NS	NS	NS	NS	NS	NS	NS	NS	NS	NS	NS	NS	NS	0.0174	NS	NS	NS	NS	NS	NS	NS	NS	NS	NS	NS	NS
97	sulfur amino acid biosynthetic process (GO:0000097)	NS	NS	NS	NS	NS	NS	NS	NS	NS	NS	NS	NS	NS	NS	NS	NS	NS	NS	0.0466	NS	NS	NS	NS	NS	NS	NS	NS	NS	NS	NS
140053	mitochondrial gene expression (GO:0140053)	NS	NS	NS	NS	NS	NS	NS	NS	NS	NS	NS	NS	NS	NS	NS	NS	NS	0.0196	NS	NS	NS	NS	NS	NS	NS	NS	NS	NS	NS	NS
33043	regulation of organelle organization (GO:0033043)	NS	NS	NS	NS	NS	NS	NS	NS	NS	NS	NS	NS	NS	NS	NS	NS	NS	0.00715	NS	0.0175	NS	NS	NS	NS	NS	NS	NS	NS	NS	NS
51304	chromosome separation (GO:0051304)	NS	NS	NS	NS	NS	NS	NS	NS	NS	NS	NS	NS	NS	NS	NS	0.0214	NS	NS	NS	NS	NS	NS	NS	NS	NS	NS	NS	NS	NS	NS
8356	asymmetric cell division (GO:0008356)	NS	NS	NS	NS	NS	NS	NS	NS	NS	NS	NS	NS	NS	NS	NS	NS	NS	0.0204	NS	NS	NS	NS	NS	NS	NS	NS	NS	NS	NS	NS
90628	plant epidermal cell fate specification (GO:0090628)	NS	NS	NS	NS	NS	NS	NS	NS	NS	NS	NS	NS	NS	NS	NS	NS	NS	0.0398	NS	NS	NS	NS	NS	NS	NS	NS	NS	NS	NS	NS
22412	cellular process involved in reproduction in multicellular organism (GO:0022412)	NS	NS	NS	NS	NS	NS	NS	NS	NS	NS	NS	NS	NS	NS	NS	NS	NS	NS	NS	0.0451	NS	NS	NS	NS	NS	NS	NS	NS	NS	NS
724	double-strand break repair via homologous recombination (GO:0000724)	NS	NS	NS	NS	NS	NS	NS	NS	NS	NS	NS	NS	NS	NS	NS	NS	0.0178	7.98e-05	NS	NS	NS	NS	NS	NS	NS	NS	NS	NS	NS	NS
51783	regulation of nuclear division (GO:0051783)	NS	NS	NS	NS	NS	NS	NS	NS	NS	NS	NS	NS	NS	NS	NS	NS	NS	0.0314	NS	NS	NS	NS	NS	NS	NS	NS	NS	NS	NS	NS
7063	regulation of sister chromatid cohesion (GO:0007063)	NS	NS	NS	NS	NS	NS	NS	NS	NS	NS	NS	NS	NS	NS	NS	NS	NS	NS	0.0402	0.0444	NS	NS	NS	NS	NS	NS	NS	NS	NS	NS
51447	negative regulation of meiotic cell cycle (GO:0051447)	NS	NS	NS	NS	NS	NS	NS	NS	NS	NS	NS	NS	NS	NS	NS	NS	NS	0.0211	NS	NS	NS	NS	NS	NS	NS	NS	NS	NS	NS	NS
30187	melatonin biosynthetic process (GO:0030187)	NS	NS	NS	NS	NS	NS	NS	NS	NS	NS	NS	NS	NS	NS	NS	NS	0.046	NS	NS	NS	NS	NS	NS	NS	NS	NS	NS	NS	NS	NS
913	preprophase band assembly (GO:0000913)	NS	NS	NS	NS	NS	NS	NS	NS	NS	NS	NS	NS	NS	NS	NS	NS	NS	NS	NS	0.0484	NS	NS	NS	NS	NS	NS	NS	NS	NS	NS
6743	ubiquinone metabolic process (GO:0006743)	NS	NS	NS	NS	NS	NS	NS	NS	NS	NS	NS	NS	NS	NS	NS	NS	NS	NS	0.0467	NS	NS	NS	NS	NS	NS	NS	NS	NS	NS	NS
90329	regulation of DNA-templated DNA replication (GO:0090329)	NS	NS	NS	NS	NS	NS	NS	NS	NS	NS	NS	NS	NS	NS	NS	NS	0.0039	0.0221	NS	NS	NS	NS	NS	NS	NS	NS	NS	NS	NS	NS
98763	mitotic cell cycle phase (GO:0098763)	NS	NS	NS	NS	NS	NS	NS	NS	NS	NS	NS	NS	NS	NS	NS	NS	0.0458	NS	NS	NS	NS	NS	NS	NS	NS	NS	NS	NS	NS	NS
6744	ubiquinone biosynthetic process (GO:0006744)	NS	NS	NS	NS	NS	NS	NS	NS	NS	NS	NS	NS	NS	NS	NS	NS	NS	NS	0.0468	NS	NS	NS	NS	NS	NS	NS	NS	NS	NS	NS
44208	'de novo' AMP biosynthetic process (GO:0044208)	NS	NS	NS	NS	NS	NS	NS	NS	NS	NS	NS	NS	NS	NS	NS	0.0215	NS	NS	NS	NS	NS	NS	NS	NS	NS	NS	NS	NS	NS	NS
10588	cotyledon vascular tissue pattern formation (GO:0010588)	NS	NS	NS	NS	NS	NS	NS	NS	NS	NS	NS	NS	NS	NS	NS	NS	NS	0.00798	NS	NS	NS	NS	NS	NS	NS	NS	NS	NS	NS	NS
9064	glutamine family amino acid metabolic process (GO:0009064)	NS	NS	NS	NS	NS	NS	NS	NS	NS	NS	NS	NS	NS	NS	NS	0.0342	NS	NS	NS	NS	NS	NS	NS	NS	NS	NS	NS	NS	NS	NS
8215	spermine metabolic process (GO:0008215)	NS	NS	NS	NS	NS	NS	NS	NS	NS	NS	NS	NS	NS	NS	NS	0.00559	NS	NS	NS	NS	NS	NS	NS	NS	NS	NS	NS	NS	NS	NS
45876	positive regulation of sister chromatid cohesion (GO:0045876)	NS	NS	NS	NS	NS	NS	NS	NS	NS	NS	NS	NS	NS	NS	NS	NS	NS	NS	0.0401	0.0432	NS	NS	NS	NS	NS	NS	NS	NS	NS	NS
6754	ATP biosynthetic process (GO:0006754)	NS	NS	NS	NS	NS	NS	NS	NS	NS	NS	NS	NS	NS	NS	NS	NS	0.0199	NS	NS	NS	NS	NS	NS	NS	NS	NS	NS	NS	NS	NS
16102	diterpenoid biosynthetic process (GO:0016102)	NS	NS	NS	NS	NS	NS	NS	NS	NS	NS	NS	NS	NS	NS	NS	0.0292	NS	NS	NS	NS	NS	NS	NS	NS	NS	NS	NS	NS	NS	NS
6271	DNA strand elongation involved in DNA replication (GO:0006271)	NS	NS	NS	NS	NS	NS	NS	NS	NS	NS	NS	NS	NS	NS	NS	NS	NS	0.0175	NS	NS	NS	NS	NS	NS	NS	NS	NS	NS	NS	NS
10090	trichome morphogenesis (GO:0010090)	NS	NS	NS	NS	NS	NS	NS	NS	NS	NS	NS	NS	NS	NS	NS	NS	NS	0.0165	NS	NS	NS	NS	NS	NS	NS	NS	NS	NS	NS	NS
10389	regulation of G2/M transition of mitotic cell cycle (GO:0010389)	NS	NS	NS	NS	NS	NS	NS	NS	NS	NS	NS	NS	NS	NS	NS	NS	NS	0.0211	NS	NS	NS	NS	NS	NS	NS	NS	NS	NS	NS	NS
10608	post-transcriptional regulation of gene expression (GO:0010608)	NS	NS	NS	NS	NS	NS	NS	NS	NS	NS	NS	NS	NS	NS	NS	NS	NS	0.0198	NS	NS	NS	NS	NS	NS	NS	NS	NS	NS	NS	NS
43039	tRNA aminoacylation (GO:0043039)	NS	NS	NS	NS	NS	NS	NS	NS	NS	NS	NS	NS	NS	NS	NS	0.0367	NS	NS	NS	NS	NS	NS	NS	NS	NS	NS	NS	NS	NS	NS
6021	inositol biosynthetic process (GO:0006021)	NS	NS	NS	NS	NS	NS	NS	NS	NS	NS	NS	NS	NS	NS	NS	0.0121	0.00802	0.00931	0.0201	NS	NS	NS	NS	NS	NS	NS	NS	NS	NS	NS
6820	monoatomic anion transport (GO:0006820)	NS	NS	NS	NS	NS	NS	NS	NS	NS	NS	NS	NS	NS	NS	NS	NS	NS	0.0384	NS	NS	NS	NS	NS	NS	NS	NS	NS	NS	NS	NS
30186	melatonin metabolic process (GO:0030186)	NS	NS	NS	NS	NS	NS	NS	NS	NS	NS	NS	NS	NS	NS	NS	NS	0.00805	NS	0.0202	NS	NS	NS	NS	NS	NS	NS	NS	NS	NS	NS
9082	branched-chain amino acid biosynthetic process (GO:0009082)	NS	NS	NS	NS	NS	NS	NS	NS	NS	NS	NS	NS	NS	NS	NS	0.0369	NS	NS	NS	NS	NS	NS	NS	NS	NS	NS	NS	NS	NS	NS
33045	regulation of sister chromatid segregation (GO:0033045)	NS	NS	NS	NS	NS	NS	NS	NS	NS	NS	NS	NS	NS	NS	NS	NS	NS	0.00949	NS	NS	NS	NS	NS	NS	NS	NS	NS	NS	NS	NS
51667	establishment of plastid localization (GO:0051667)	NS	NS	NS	NS	NS	NS	NS	NS	NS	NS	NS	NS	NS	NS	NS	NS	0.0342	0.0169	NS	0.0322	NS	NS	NS	NS	NS	NS	NS	NS	NS	NS
98869	cellular oxidant detoxification (GO:0098869)	NS	NS	NS	NS	NS	NS	NS	NS	NS	NS	NS	NS	NS	NS	NS	0.0463	NS	NS	NS	NS	NS	NS	NS	NS	NS	NS	NS	NS	NS	NS
43650	dicarboxylic acid biosynthetic process (GO:0043650)	NS	NS	NS	NS	NS	NS	NS	NS	NS	NS	NS	NS	NS	NS	NS	0.00852	NS	NS	NS	NS	NS	NS	NS	NS	NS	NS	NS	NS	NS	NS
1900384	regulation of flavonol biosynthetic process (GO:1900384)	NS	NS	NS	NS	NS	NS	NS	NS	NS	NS	NS	NS	NS	NS	NS	NS	NS	NS	0.0202	NS	NS	NS	NS	NS	NS	NS	NS	NS	NS	NS
6167	AMP biosynthetic process (GO:0006167)	NS	NS	NS	NS	NS	NS	NS	NS	NS	NS	NS	NS	NS	NS	NS	0.0365	NS	NS	NS	NS	NS	NS	NS	NS	NS	NS	NS	NS	NS	NS
30050	vesicle transport along actin filament (GO:0030050)	NS	NS	NS	NS	NS	NS	NS	NS	NS	NS	NS	NS	NS	NS	NS	NS	NS	0.0394	NS	NS	NS	NS	NS	NS	NS	NS	NS	NS	NS	NS
6525	arginine metabolic process (GO:0006525)	NS	NS	NS	NS	NS	NS	NS	NS	NS	NS	NS	NS	NS	NS	NS	0.00748	NS	NS	NS	NS	NS	NS	NS	NS	NS	NS	NS	NS	NS	NS
9308	amine metabolic process (GO:0009308)	NS	NS	NS	NS	NS	NS	NS	NS	NS	NS	NS	NS	NS	NS	NS	NS	NS	NS	0.0293	NS	NS	NS	NS	NS	NS	NS	NS	NS	NS	NS
43489	RNA stabilization (GO:0043489)	NS	NS	NS	NS	NS	NS	NS	NS	NS	NS	NS	NS	NS	NS	NS	NS	NS	0.027	NS	NS	NS	NS	NS	NS	NS	NS	NS	NS	NS	NS
1905818	regulation of chromosome separation (GO:1905818)	NS	NS	NS	NS	NS	NS	NS	NS	NS	NS	NS	NS	NS	NS	NS	NS	NS	0.0174	NS	NS	NS	NS	NS	NS	NS	NS	NS	NS	NS	NS
51983	regulation of chromosome segregation (GO:0051983)	NS	NS	NS	NS	NS	NS	NS	NS	NS	NS	NS	NS	NS	NS	NS	NS	NS	0.0167	NS	NS	NS	NS	NS	NS	NS	NS	NS	NS	NS	NS
51231	spindle elongation (GO:0051231)	NS	NS	NS	NS	NS	NS	NS	NS	NS	NS	NS	NS	NS	NS	NS	NS	0.0357	0.00435	NS	0.0481	NS	NS	NS	NS	NS	NS	NS	NS	NS	NS
6767	water-soluble vitamin metabolic process (GO:0006767)	NS	NS	NS	NS	NS	NS	NS	NS	NS	NS	NS	NS	NS	NS	NS	0.0486	NS	NS	NS	NS	NS	NS	NS	NS	NS	NS	NS	NS	NS	NS
271	polysaccharide biosynthetic process (GO:0000271)	NS	NS	NS	NS	NS	NS	NS	NS	NS	NS	NS	NS	NS	NS	NS	NS	0.0186	0.031	NS	NS	NS	NS	NS	NS	NS	NS	NS	NS	NS	NS
10026	trichome differentiation (GO:0010026)	NS	NS	NS	NS	NS	NS	NS	NS	NS	NS	NS	NS	NS	NS	NS	NS	NS	0.000192	NS	NS	NS	NS	NS	NS	NS	NS	NS	NS	NS	NS
9963	positive regulation of flavonoid biosynthetic process (GO:0009963)	NS	NS	NS	NS	NS	NS	NS	NS	NS	NS	NS	NS	NS	NS	NS	NS	NS	0.00177	0.00409	NS	NS	NS	NS	NS	NS	NS	NS	NS	NS	NS
7052	mitotic spindle organization (GO:0007052)	NS	NS	NS	NS	NS	NS	NS	NS	NS	NS	NS	NS	NS	NS	NS	0.0464	0.00149	0.000618	0.00881	0.00434	NS	NS	NS	NS	NS	NS	NS	NS	NS	NS
45930	negative regulation of mitotic cell cycle (GO:0045930)	NS	NS	NS	NS	NS	NS	NS	NS	NS	NS	NS	NS	NS	NS	NS	NS	NS	0.000771	NS	NS	NS	NS	NS	NS	NS	NS	NS	NS	NS	NS
5986	sucrose biosynthetic process (GO:0005986)	NS	NS	NS	NS	NS	NS	NS	NS	NS	NS	NS	NS	NS	NS	NS	0.00719	NS	0.0272	0.0087	NS	NS	NS	NS	NS	NS	NS	NS	NS	NS	NS
413	protein peptidyl-prolyl isomerization (GO:0000413)	NS	NS	NS	NS	NS	NS	NS	NS	NS	NS	NS	NS	NS	NS	NS	0.0461	NS	NS	NS	NS	NS	NS	NS	NS	NS	NS	NS	NS	NS	NS
45036	protein targeting to chloroplast (GO:0045036)	NS	NS	NS	NS	NS	NS	NS	NS	NS	NS	NS	NS	NS	NS	NS	0.0368	NS	NS	NS	NS	NS	NS	NS	NS	NS	NS	NS	NS	NS	NS
45038	protein import into chloroplast thylakoid membrane (GO:0045038)	NS	NS	NS	NS	NS	NS	NS	NS	NS	NS	NS	NS	NS	NS	NS	NS	NS	0.0397	NS	NS	NS	NS	NS	NS	NS	NS	NS	NS	NS	NS
51329	mitotic interphase (GO:0051329)	NS	NS	NS	NS	NS	NS	NS	NS	NS	NS	NS	NS	NS	NS	NS	NS	NS	NS	NS	0.044	NS	NS	NS	NS	NS	NS	NS	NS	NS	NS
16579	protein deubiquitination (GO:0016579)	NS	NS	NS	NS	NS	NS	NS	NS	NS	NS	NS	NS	NS	NS	NS	0.0403	NS	NS	NS	NS	NS	NS	NS	NS	NS	NS	NS	NS	NS	NS
48232	male gamete generation (GO:0048232)	NS	NS	NS	NS	NS	NS	NS	NS	NS	NS	NS	NS	NS	NS	NS	NS	NS	NS	NS	0.0127	NS	NS	NS	NS	NS	NS	NS	NS	NS	NS
46040	IMP metabolic process (GO:0046040)	NS	NS	NS	NS	NS	NS	NS	NS	NS	NS	NS	NS	NS	NS	NS	0.0245	NS	NS	NS	NS	NS	NS	NS	NS	NS	NS	NS	NS	NS	NS
45017	glycerolipid biosynthetic process (GO:0045017)	NS	NS	NS	NS	NS	NS	NS	NS	NS	NS	NS	NS	NS	NS	NS	0.0394	NS	NS	NS	NS	NS	NS	NS	NS	NS	NS	NS	NS	NS	NS
10444	guard mother cell differentiation (GO:0010444)	NS	NS	NS	NS	NS	NS	NS	NS	NS	NS	NS	NS	NS	NS	NS	NS	0.0356	0.042	NS	NS	NS	NS	NS	NS	NS	NS	NS	NS	NS	NS
6265	DNA topological change (GO:0006265)	NS	NS	NS	NS	NS	NS	NS	NS	NS	NS	NS	NS	NS	NS	NS	NS	NS	0.0422	NS	NS	NS	NS	NS	NS	NS	NS	NS	NS	NS	NS
6144	purine nucleobase metabolic process (GO:0006144)	NS	NS	NS	NS	NS	NS	NS	NS	NS	NS	NS	NS	NS	NS	NS	NS	0.0409	NS	NS	NS	NS	NS	NS	NS	NS	NS	NS	NS	NS	NS
1903046	meiotic cell cycle process (GO:1903046)	NS	NS	NS	NS	NS	NS	NS	NS	NS	NS	NS	NS	NS	NS	NS	NS	NS	0.000292	NS	0.00115	NS	NS	NS	NS	NS	NS	NS	NS	NS	NS
6000	fructose metabolic process (GO:0006000)	NS	NS	NS	NS	NS	NS	NS	NS	NS	NS	NS	NS	NS	NS	NS	NS	NS	NS	0.0461	NS	NS	NS	NS	NS	NS	NS	NS	NS	NS	NS
40034	regulation of development, heterochronic (GO:0040034)	NS	NS	NS	NS	NS	NS	NS	NS	NS	NS	NS	NS	NS	NS	NS	NS	NS	0.0184	NS	NS	NS	NS	NS	NS	NS	NS	NS	NS	NS	NS
28	ribosomal small subunit assembly (GO:0000028)	NS	NS	NS	NS	NS	NS	NS	NS	NS	NS	NS	NS	NS	NS	NS	0.0369	NS	NS	NS	NS	NS	NS	NS	NS	NS	NS	NS	NS	NS	NS
46500	S-adenosylmethionine metabolic process (GO:0046500)	NS	NS	NS	NS	NS	NS	NS	NS	NS	NS	NS	NS	NS	NS	NS	0.0235	NS	NS	NS	NS	NS	NS	NS	NS	NS	NS	NS	NS	NS	NS
5978	glycogen biosynthetic process (GO:0005978)	NS	NS	NS	NS	NS	NS	NS	NS	NS	NS	NS	NS	NS	NS	NS	0.00277	NS	NS	0.0122	NS	NS	NS	NS	NS	NS	NS	NS	NS	NS	NS
31540	regulation of anthocyanin biosynthetic process (GO:0031540)	NS	NS	NS	NS	NS	NS	NS	NS	NS	NS	NS	NS	NS	NS	NS	NS	NS	0.0385	NS	NS	NS	NS	NS	NS	NS	NS	NS	NS	NS	NS
9088	threonine biosynthetic process (GO:0009088)	NS	NS	NS	NS	NS	NS	NS	NS	NS	NS	NS	NS	NS	NS	NS	NS	NS	NS	0.0182	NS	NS	NS	NS	NS	NS	NS	NS	NS	NS	NS
6566	threonine metabolic process (GO:0006566)	NS	NS	NS	NS	NS	NS	NS	NS	NS	NS	NS	NS	NS	NS	NS	NS	NS	NS	0.0463	NS	NS	NS	NS	NS	NS	NS	NS	NS	NS	NS
30174	regulation of DNA-templated DNA replication initiation (GO:0030174)	NS	NS	NS	NS	NS	NS	NS	NS	NS	NS	NS	NS	NS	NS	NS	NS	0.0157	0.0166	NS	NS	NS	NS	NS	NS	NS	NS	NS	NS	NS	NS
9962	regulation of flavonoid biosynthetic process (GO:0009962)	NS	NS	NS	NS	NS	NS	NS	NS	NS	NS	NS	NS	NS	NS	NS	NS	0.00448	0.00195	0.00724	0.019	NS	NS	NS	NS	NS	NS	NS	NS	NS	NS
6656	phosphatidylcholine biosynthetic process (GO:0006656)	NS	NS	NS	NS	NS	NS	NS	NS	NS	NS	NS	NS	NS	NS	NS	0.0258	NS	NS	NS	NS	NS	NS	NS	NS	NS	NS	NS	NS	NS	NS
727	double-strand break repair via break-induced replication (GO:0000727)	NS	NS	NS	NS	NS	NS	NS	NS	NS	NS	NS	NS	NS	NS	NS	NS	0.00901	0.00178	NS	0.0274	NS	NS	NS	NS	NS	NS	NS	NS	NS	NS
46398	UDP-glucuronate metabolic process (GO:0046398)	NS	NS	NS	NS	NS	NS	NS	NS	NS	NS	NS	NS	NS	NS	NS	0.012	NS	NS	NS	NS	NS	NS	NS	NS	NS	NS	NS	NS	NS	NS
7080	mitotic metaphase chromosome alignment (GO:0007080)	NS	NS	NS	NS	NS	NS	NS	NS	NS	NS	NS	NS	NS	NS	NS	NS	0.00812	NS	NS	NS	NS	NS	NS	NS	NS	NS	NS	NS	NS	NS
70085	glycosylation (GO:0070085)	NS	NS	NS	NS	NS	NS	NS	NS	NS	NS	NS	NS	NS	NS	NS	NS	NS	0.0344	NS	NS	NS	NS	NS	NS	NS	NS	NS	NS	NS	NS
43038	amino acid activation (GO:0043038)	NS	NS	NS	NS	NS	NS	NS	NS	NS	NS	NS	NS	NS	NS	NS	0.0391	NS	NS	NS	NS	NS	NS	NS	NS	NS	NS	NS	NS	NS	NS
42558	pteridine-containing compound metabolic process (GO:0042558)	NS	NS	NS	NS	NS	NS	NS	NS	NS	NS	NS	NS	NS	NS	NS	0.0413	NS	NS	NS	NS	NS	NS	NS	NS	NS	NS	NS	NS	NS	NS
48869	cellular developmental process (GO:0048869)	NS	NS	NS	NS	NS	NS	NS	NS	NS	NS	NS	NS	NS	NS	NS	NS	NS	0.0167	NS	NS	NS	NS	NS	NS	NS	NS	NS	NS	NS	NS
19288	isopentenyl diphosphate biosynthetic process, methylerythritol 4-phosphate pathway (GO:0019288)	NS	NS	NS	NS	NS	NS	NS	NS	NS	NS	NS	NS	NS	NS	NS	0.0125	NS	NS	NS	NS	NS	NS	NS	NS	NS	NS	NS	NS	NS	NS
10439	regulation of glucosinolate biosynthetic process (GO:0010439)	NS	NS	NS	NS	NS	NS	NS	NS	NS	NS	NS	NS	NS	NS	NS	0.00246	NS	NS	0.0351	NS	NS	NS	NS	NS	NS	NS	NS	NS	NS	NS
9206	purine ribonucleoside triphosphate biosynthetic process (GO:0009206)	NS	NS	NS	NS	NS	NS	NS	NS	NS	NS	NS	NS	NS	NS	NS	NS	0.01	NS	NS	NS	NS	NS	NS	NS	NS	NS	NS	NS	NS	NS
33313	meiotic cell cycle checkpoint signaling (GO:0033313)	NS	NS	NS	NS	NS	NS	NS	NS	NS	NS	NS	NS	NS	NS	NS	NS	NS	0.0166	NS	NS	NS	NS	NS	NS	NS	NS	NS	NS	NS	NS
18209	peptidyl-serine modification (GO:0018209)	NS	NS	NS	NS	NS	NS	NS	NS	NS	NS	NS	NS	NS	NS	NS	0.0367	NS	NS	NS	NS	NS	NS	NS	NS	NS	NS	NS	NS	NS	NS
10639	negative regulation of organelle organization (GO:0010639)	NS	NS	NS	NS	NS	NS	NS	NS	NS	NS	NS	NS	NS	NS	NS	NS	NS	0.00394	NS	NS	NS	NS	NS	NS	NS	NS	NS	NS	NS	NS
44843	cell cycle G1/S phase transition (GO:0044843)	NS	NS	NS	NS	NS	NS	NS	NS	NS	NS	NS	NS	NS	NS	NS	NS	NS	0.0173	NS	NS	NS	NS	NS	NS	NS	NS	NS	NS	NS	NS
6636	unsaturated fatty acid biosynthetic process (GO:0006636)	NS	NS	NS	NS	NS	NS	NS	NS	NS	NS	NS	NS	NS	NS	NS	0.0464	NS	0.0339	NS	0.00909	NS	NS	NS	NS	NS	NS	NS	NS	NS	NS
6595	polyamine metabolic process (GO:0006595)	NS	NS	NS	NS	NS	NS	NS	NS	NS	NS	NS	NS	NS	NS	NS	0.0305	NS	NS	0.0149	NS	NS	NS	NS	NS	NS	NS	NS	NS	NS	NS
10948	negative regulation of cell cycle process (GO:0010948)	NS	NS	NS	NS	NS	NS	NS	NS	NS	NS	NS	NS	NS	NS	NS	NS	NS	3.02e-05	NS	NS	NS	NS	NS	NS	NS	NS	NS	NS	NS	NS
7088	regulation of mitotic nuclear division (GO:0007088)	NS	NS	NS	NS	NS	NS	NS	NS	NS	NS	NS	NS	NS	NS	NS	NS	NS	0.0322	NS	NS	NS	NS	NS	NS	NS	NS	NS	NS	NS	NS
71897	DNA biosynthetic process (GO:0071897)	NS	NS	NS	NS	NS	NS	NS	NS	NS	NS	NS	NS	NS	NS	NS	NS	NS	0.0265	NS	NS	NS	NS	NS	NS	NS	NS	NS	NS	NS	NS
31123	RNA 3'-end processing (GO:0031123)	NS	NS	NS	NS	NS	NS	NS	NS	NS	NS	NS	NS	NS	NS	NS	NS	0.0114	NS	NS	NS	NS	NS	NS	NS	NS	NS	NS	NS	NS	NS
9226	nucleotide-sugar biosynthetic process (GO:0009226)	NS	NS	NS	NS	NS	NS	NS	NS	NS	NS	NS	NS	NS	NS	NS	NS	NS	0.0222	NS	NS	NS	NS	NS	NS	NS	NS	NS	NS	NS	NS
10438	cellular response to sulfur starvation (GO:0010438)	NS	NS	NS	NS	NS	NS	NS	NS	NS	NS	NS	NS	NS	NS	NS	0.00591	0.0359	0.00436	0.00437	NS	NS	NS	NS	NS	NS	NS	NS	NS	NS	NS
45786	negative regulation of cell cycle (GO:0045786)	NS	NS	NS	NS	NS	NS	NS	NS	NS	NS	NS	NS	NS	NS	NS	NS	NS	6.72e-05	NS	NS	NS	NS	NS	NS	NS	NS	NS	NS	NS	NS
9101	glycoprotein biosynthetic process (GO:0009101)	NS	NS	NS	NS	NS	NS	NS	NS	NS	NS	NS	NS	NS	NS	NS	NS	NS	0.035	NS	NS	NS	NS	NS	NS	NS	NS	NS	NS	NS	NS
18105	peptidyl-serine phosphorylation (GO:0018105)	NS	NS	NS	NS	NS	NS	NS	NS	NS	NS	NS	NS	NS	NS	NS	0.0367	NS	NS	NS	NS	NS	NS	NS	NS	NS	NS	NS	NS	NS	NS
06576	biogenic amine metabolic process (GO:0006576)	NS	NS	NS	NS	NS	NS	NS	NS	NS	NS	NS	NS	NS	NS	NS	NS	NS	NS	0.00427	NS	NS	NS	NS	NS	NS	NS	NS	NS	NS	NS
15986	proton motive force-driven ATP synthesis (GO:0015986)	NS	NS	NS	NS	NS	NS	NS	NS	NS	NS	NS	NS	NS	NS	NS	NS	0.0198	NS	NS	NS	NS	NS	NS	NS	NS	NS	NS	NS	NS	NS
