# Supplementary material
Source: Research Square preprint supplement (doi:10.21203/rs.3.rs-9349369/v1)
Supplement: Supplementary file 7 [file 5e487aa8d720ce89a4f5c9c6.xlsx]

## Sheet: Supplemental Table S5.
Supplemental Table S5. Lists of Col DEGs associated with GO group GO:0001666 (Response to Hypoxia). These DEGs were clustered as described in Figure 5A. Organ-specific expression responses to spaceflight conditions are shown for the five genotypes tested in APEX08. The results of GO- and transcription-factor target enrichment analyses are also shown in this spreadsheet. NS represents no significa…
Group	Gene ID	Name	Description
Group Ih	AT2G33590	CRL1	NAD(P)-binding Rossmann-fold superfamily protein [Source:NCBI gene (formerly Entrezgene);Acc:817925]
	AT1G67360	AT1G67360	Rubber elongation factor protein (REF) [Source:NCBI gene (formerly Entrezgene);Acc:843057]
	AT4G24160	AT4G24160	alpha/beta-Hydrolases superfamily protein [Source:NCBI gene (formerly Entrezgene);Acc:828516]
	AT3G23170	AT3G23170
	AT1G72920	AT1G72920	Toll-Interleukin-Resistance (TIR) domain family protein [Source:NCBI gene (formerly Entrezgene);Acc:843623]
	AT1G13360	AT1G13360
	AT4G11660	AT-HSFB2B	winged-helix DNA-binding transcription factor family protein [Source:NCBI gene (formerly Entrezgene);Acc:826771]
	AT5G54960	PDC2	pyruvate decarboxylase-2 [Source:NCBI gene (formerly Entrezgene);Acc:835587]
	AT5G06320	NHL3	NDR1/HIN1-like 3 [Source:NCBI gene (formerly Entrezgene);Acc:830520]
	AT5G42380	CML37	calmodulin like 37 [Source:NCBI gene (formerly Entrezgene);Acc:834244]
	AT5G58070	TIL	temperature-induced lipocalin [Source:NCBI gene (formerly Entrezgene);Acc:835919]
	AT5G54470	BBX29	B-box type zinc finger family protein [Source:NCBI gene (formerly Entrezgene);Acc:835535]
	AT1G27730	STZ	salt tolerance zinc finger [Source:NCBI gene (formerly Entrezgene);Acc:839666]
	AT3G24500	MBF1C	multiprotein bridging factor 1C [Source:NCBI gene (formerly Entrezgene);Acc:822041]
	AT5G47910	RBOHD	respiratory burst oxidase homologue D [Source:NCBI gene (formerly Entrezgene);Acc:834842]
	AT2G47730	GSTF8	glutathione S-transferase phi 8 [Source:NCBI gene (formerly Entrezgene);Acc:819386]
	AT1G78070	AT1G78070	Transducin/WD40 repeat-like superfamily protein [Source:NCBI gene (formerly Entrezgene);Acc:844142]
	AT1G74310	HSP101	heat shock protein 101 [Source:NCBI gene (formerly Entrezgene);Acc:843771]
	AT4G27657	AT4G27657
	AT4G34150	AT4G34150	Calcium-dependent lipid-binding (CaLB domain) family protein [Source:NCBI gene (formerly Entrezgene);Acc:829563]
	AT5G05410	DREB2A	DRE-binding protein 2A [Source:NCBI gene (formerly Entrezgene);Acc:830424]
	AT2G46400	WRKY46	WRKY DNA-binding protein 46 [Source:NCBI gene (formerly Entrezgene);Acc:819248]
	AT5G35735	AT5G35735	Auxin-responsive family protein [Source:NCBI gene (formerly Entrezgene);Acc:833550]
	AT4G24570	DIC2	dicarboxylate carrier 2 [Source:NCBI gene (formerly Entrezgene);Acc:828559]
	AT1G61340	FBS1	F-box family protein [Source:NCBI gene (formerly Entrezgene);Acc:842428]
	AT1G72940	AT1G72940	Toll-Interleukin-Resistance (TIR) domain-containing protein [Source:NCBI gene (formerly Entrezgene);Acc:843625]
Group IIh	AT4G32480	AT4G32480	sugar phosphate exchanger, putative (DUF506) [Source:NCBI gene (formerly Entrezgene);Acc:829383]
	AT1G72330	ALAAT2	alanine aminotransferase 2 [Source:NCBI gene (formerly Entrezgene);Acc:843565]
	AT3G02040	SRG3	senescence-related 3 [Source:NCBI gene (formerly Entrezgene);Acc:821175]
	AT5G25250	FLOT1	SPFH/Band 7/PHB domain-containing membrane-associated protein family [Source:NCBI gene (formerly Entrezgene);Acc:832596]
	AT3G07350	F21O3.6
	AT3G06435	AT3G06435	Expressed protein [Source:NCBI gene (formerly Entrezgene);Acc:28718918]
	AT3G43190	SUS4	sucrose synthase 4 [Source:NCBI gene (formerly Entrezgene);Acc:823393]
	AT5G19120	AT5G19120	Eukaryotic aspartyl protease family protein [Source:NCBI gene (formerly Entrezgene);Acc:832032]
	AT5G41080	GDPD2	PLC-like phosphodiesterases superfamily protein [Source:NCBI gene (formerly Entrezgene);Acc:834110]
	AT3G49780	PSK4	phytosulfokine 4 [Source:NCBI gene (formerly Entrezgene);Acc:824140]
	AT1G72360	ERF73	Integrase-type DNA-binding superfamily protein [Source:NCBI gene (formerly Entrezgene);Acc:843568]
	AT2G26560	PLA2A	phospholipase A 2A [Source:NCBI gene (formerly Entrezgene);Acc:817197]
	AT5G57220	CYP81F2	cytochrome P450, family 81, subfamily F, polypeptide 2 [Source:NCBI gene (formerly Entrezgene);Acc:835828]
	AT1g10140	AT1G10140	Uncharacterized conserved protein UCP031279 [Source:NCBI gene (formerly Entrezgene);Acc:837551]
	AT4G27450	AT4G27450	aluminum induced protein with YGL and LRDR motifs [Source:NCBI gene (formerly Entrezgene);Acc:828854]
	AT1G33055	AT1G33055
	AT4G24230	ACBP3	acyl-CoA-binding domain 3 [Source:NCBI gene (formerly Entrezgene);Acc:828524]
	AT4G38470	STY46	ACT-like protein tyrosine kinase family protein [Source:NCBI gene (formerly Entrezgene);Acc:830003]
	AT1G26380	AT1G26380	FAD-binding Berberine family protein [Source:NCBI gene (formerly Entrezgene);Acc:839180]
	AT5G20250	DIN10	Raffinose synthase family protein [Source:NCBI gene (formerly Entrezgene);Acc:832147]
	AT2G18670	AT2G18670	RING/U-box superfamily protein [Source:NCBI gene (formerly Entrezgene);Acc:816382]
	AT2G15890	MEE14	maternal effect embryo arrest 14 [Source:NCBI gene (formerly Entrezgene);Acc:816085]
	AT3G23150	ETR2	Signal transduction histidine kinase, hybrid-type, ethylene sensor [Source:NCBI gene (formerly Entrezgene);Acc:821891]
	AT1G03220	AT1G03220	Eukaryotic aspartyl protease family protein [Source:NCBI gene (formerly Entrezgene);Acc:838517]
	AT1G30720	AT1G30720	FAD-binding Berberine family protein [Source:NCBI gene (formerly Entrezgene);Acc:839952]
	AT5G39890	AT5G39890	2-aminoethanethiol dioxygenase, putative (DUF1637) [Source:NCBI gene (formerly Entrezgene);Acc:833986]
	AT5G15120	AT5G15120	2-aminoethanethiol dioxygenase, putative (DUF1637) [Source:NCBI gene (formerly Entrezgene);Acc:831364]
	AT1G77120	ADH1	alcohol dehydrogenase 1 [Source:NCBI gene (formerly Entrezgene);Acc:844047]
	AT5G03730	CTR1	Protein kinase superfamily protein [Source:NCBI gene (formerly Entrezgene);Acc:831748]
	AT3G02550	LBD41	LOB domain-containing protein 41 [Source:NCBI gene (formerly Entrezgene);Acc:821112]
	AT1G19530	AT1G19530	DNA polymerase epsilon catalytic subunit A [Source:NCBI gene (formerly Entrezgene);Acc:838540]
	AT1G55810	UKL3	uridine kinase-like 3 [Source:NCBI gene (formerly Entrezgene);Acc:842031]
Group IIIh	AT2G41100	TCH3	Calcium-binding EF hand family protein [Source:NCBI gene (formerly Entrezgene);Acc:818709]
	AT2G40140	CZF1	zinc finger (CCCH-type) family protein [Source:NCBI gene (formerly Entrezgene);Acc:818605]
	AT5G66650	AT5G66650	calcium uniporter (DUF607) [Source:NCBI gene (formerly Entrezgene);Acc:836797]
	AT2G41010	CAMBP25	calmodulin (CAM)-binding protein of 25 kDa [Source:NCBI gene (formerly Entrezgene);Acc:818701]
	AT3G52430	PAD4	alpha/beta-Hydrolases superfamily protein [Source:NCBI gene (formerly Entrezgene);Acc:824408]
	AT3G55980	SZF1	salt-inducible zinc finger 1 [Source:NCBI gene (formerly Entrezgene);Acc:824764]
	AT2G36580	AT2G36580	Pyruvate kinase family protein [Source:NCBI gene (formerly Entrezgene);Acc:818231]
	AT1G68840	RAV2	related to ABI3/VP1 2 [Source:NCBI gene (formerly Entrezgene);Acc:843216]
	AT1G76680	OPR1	12-oxophytodienoate reductase 1 [Source:NCBI gene (formerly Entrezgene);Acc:844001]
	AT3G15210	ERF4	ethylene responsive element binding factor 4 [Source:NCBI gene (formerly Entrezgene);Acc:820752]
	AT1G01720	ATAF1	NAC (No Apical Meristem) domain transcriptional regulator superfamily protein [Source:NCBI gene (formerly Entrezgene);Acc:839265]
	AT1G07150	MAPKKK13	mitogen-activated protein kinase kinase kinase 13 [Source:NCBI gene (formerly Entrezgene);Acc:837226]
	AT1G22220	AUF2	F-box family protein [Source:NCBI gene (formerly Entrezgene);Acc:838827]
	AT4G12720	NUDT7	MutT/nudix family protein [Source:NCBI gene (formerly Entrezgene);Acc:826884]
	AT2G01150	RHA2B	RING-H2 finger protein 2B [Source:NCBI gene (formerly Entrezgene);Acc:814644]
	AT3G52800	AT3G52800	A20/AN1-like zinc finger family protein [Source:NCBI gene (formerly Entrezgene);Acc:824446]
	AT5G57560	TCH4	Xyloglucan endotransglucosylase/hydrolase family protein [Source:NCBI gene (formerly Entrezgene);Acc:835860]
	AT1G50740	AT1G50740	Transmembrane proteins 14C [Source:NCBI gene (formerly Entrezgene);Acc:841496]
	AT3G25250	AGC2-1	AGC (cAMP-dependent, cGMP-dependent and protein kinase C) kinase family protein [Source:NCBI gene (formerly Entrezgene);Acc:822119]
	AT2G40000	HSPRO2	ortholog of sugar beet HS1 PRO-1 2 [Source:NCBI gene (formerly Entrezgene);Acc:818588]
	AT4G29780	AT4G29780	nuclease [Source:NCBI gene (formerly Entrezgene);Acc:829100]
	AT1G23710	AT1G23710
	AT1G09070	SRC2	soybean regulated by cold-2 [Source:NCBI gene (formerly Entrezgene);Acc:837428]
	AT2G36220	AT2G36220
	AT3G28910	MYB30	myb domain protein 30 [Source:NCBI gene (formerly Entrezgene);Acc:822525]
	AT5G42050	AT5G42050	DCD (Development and Cell Death) domain protein [Source:NCBI gene (formerly Entrezgene);Acc:834210]
	AT1G53840	PME1	pectin methylesterase 1 [Source:NCBI gene (formerly Entrezgene);Acc:841821]
	AT1G07135	AT1G07135	glycine-rich protein [Source:NCBI gene (formerly Entrezgene);Acc:837224]
	AT1G18300	NUDT4	nudix hydrolase homolog 4 [Source:NCBI gene (formerly Entrezgene);Acc:838410]
	AT5G13190	GILP	GSH-induced LITAF domain protein [Source:NCBI gene (formerly Entrezgene);Acc:831158]
	AT5G24590	TIP	TCV-interacting protein [Source:NCBI gene (formerly Entrezgene);Acc:832530]
	AT3G56880	AT3G56880	VQ motif-containing protein [Source:NCBI gene (formerly Entrezgene);Acc:824855]
	AT4G30440	GAE1	UDP-D-glucuronate 4-epimerase 1 [Source:NCBI gene (formerly Entrezgene);Acc:829167]
	AT2G22500	UCP5	uncoupling protein 5 [Source:NCBI gene (formerly Entrezgene);Acc:816783]
	AT4G27280	AT4G27280	Calcium-binding EF-hand family protein [Source:NCBI gene (formerly Entrezgene);Acc:828836]
Group IVh	AT2G36800	DOGT1	don-glucosyltransferase 1 [Source:NCBI gene (formerly Entrezgene);Acc:818252]
	AT1G66080	AT1G66080	hikeshi-like protein [Source:NCBI gene (formerly Entrezgene);Acc:842922]
	AT1G66090	AT1G66090	Disease resistance protein (TIR-NBS class) [Source:NCBI gene (formerly Entrezgene);Acc:842923]
	AT1G13260	RAV1	related to ABI3/VP1 1 [Source:NCBI gene (formerly Entrezgene);Acc:837886]
	AT1G54050	AT1G54050	HSP20-like chaperones superfamily protein [Source:NCBI gene (formerly Entrezgene);Acc:841843]
	AT3G22550	AT3G22550	NAD(P)H-quinone oxidoreductase subunit, putative (DUF581) [Source:NCBI gene (formerly Entrezgene);Acc:821826]
	AT2G41090	AT2G41090	Calcium-binding EF-hand family protein [Source:NCBI gene (formerly Entrezgene);Acc:818708]
	AT1G72910	AT1G72910	Toll-Interleukin-Resistance (TIR) domain-containing protein [Source:NCBI gene (formerly Entrezgene);Acc:843622]
	AT5G04340	ZAT6	6 [Source:NCBI gene (formerly Entrezgene);Acc:830313]
	AT1G14200	AT1G14200	RING/U-box superfamily protein [Source:NCBI gene (formerly Entrezgene);Acc:837980]
	AT3G56400	WRKY70	WRKY DNA-binding protein 70 [Source:NCBI gene (formerly Entrezgene);Acc:824807]
	AT5G19240	AT5G19240	Glycoprotein membrane GPI-anchored [Source:NCBI gene (formerly Entrezgene);Acc:832044]
	AT4G19520	AT4G19520	disease resistance protein (TIR-NBS-LRR class) family [Source:NCBI gene (formerly Entrezgene);Acc:827694]
	AT5G03380	AT5G03380	Heavy metal transport/detoxification superfamily protein [Source:NCBI gene (formerly Entrezgene);Acc:831854]
	AT5G58120	AT5G58120	Disease resistance protein (TIR-NBS-LRR class) family [Source:NCBI gene (formerly Entrezgene);Acc:835924]
	AT1G65490	AT1G65490	transmembrane protein [Source:NCBI gene (formerly Entrezgene);Acc:842861]
Group Vh	AT1G73010	PS2	inorganic pyrophosphatase 1 [Source:NCBI gene (formerly Entrezgene);Acc:843632]
	AT5G20150	SPX1	SPX domain-containing protein 1 [Source:NCBI gene (formerly Entrezgene);Acc:832137]
	AT5G65207	AT5G65207
	AT1G19250	FMO1	flavin-dependent monooxygenase 1 [Source:NCBI gene (formerly Entrezgene);Acc:838508]
	AT1G72900	AT1G72900	Toll-Interleukin-Resistance (TIR) domain-containing protein [Source:NCBI gene (formerly Entrezgene);Acc:843621]
	AT1G26410	AT1G26410	FAD-binding Berberine family protein [Source:NCBI gene (formerly Entrezgene);Acc:839183]
	AT5G20790	AT5G20790	transmembrane protein [Source:NCBI gene (formerly Entrezgene);Acc:832202]
	AT1G05880	ARI12	RING/U-box superfamily protein [Source:NCBI gene (formerly Entrezgene);Acc:837098]
	AT2G44800	AT2G44800	2-oxoglutarate (2OG) and Fe(II)-dependent oxygenase superfamily protein [Source:NCBI gene (formerly Entrezgene);Acc:819089]
	AT3G24715	AT3G24715	kinase superfamily with octicosapeptide/Phox/Bem1p domain-containing protein [Source:NCBI gene (formerly Entrezgene);Acc:822069]
	AT2G26660	SPX2	SPX domain-containing protein 2 (SPX2) [Source:NCBI gene (formerly Entrezgene);Acc:817207]
	AT5G25110	CIPK25	CBL-interacting protein kinase 25 [Source:NCBI gene (formerly Entrezgene);Acc:832582]
	AT5G20830	SUS1	sucrose synthase 1 [Source:NCBI gene (formerly Entrezgene);Acc:832206]
	AT1G78850	AT1G78850	D-mannose binding lectin protein with Apple-like carbohydrate-binding domain-containing protein [Source:NCBI gene (formerly Entrezgene);Acc:844222]
	AT2G23270	AT2G23270	transmembrane protein [Source:NCBI gene (formerly Entrezgene);Acc:816859]
Group VIh	AT4G19880	AT4G19880	Glutathione S-transferase family protein [Source:NCBI gene (formerly Entrezgene);Acc:827734]
	AT4G20380	LSD1	LSD1 zinc finger family protein [Source:NCBI gene (formerly Entrezgene);Acc:827786]
	AT1G53910	RAP2.12	related to AP2 12 [Source:NCBI gene (formerly Entrezgene);Acc:841829]
	AT1G66180	AT1G66180	Eukaryotic aspartyl protease family protein [Source:NCBI gene (formerly Entrezgene);Acc:842933]
	AT3G20770	EIN3	Ethylene insensitive 3 family protein [Source:NCBI gene (formerly Entrezgene);Acc:821625]
	AT1G74940	AT1G74940	cyclin-dependent kinase, putative (DUF581) [Source:NCBI gene (formerly Entrezgene);Acc:843833]
	AT5G19230	AT5G19230	Glycoprotein membrane GPI-anchored [Source:NCBI gene (formerly Entrezgene);Acc:832043]
	AT1G68670	AT1G68670	myb-like transcription factor family protein [Source:NCBI gene (formerly Entrezgene);Acc:843197]
	AT3G27220	AT3G27220	Galactose oxidase/kelch repeat superfamily protein [Source:NCBI gene (formerly Entrezgene);Acc:822341]
	AT3G30775	ERD5	Methylenetetrahydrofolate reductase family protein [Source:NCBI gene (formerly Entrezgene);Acc:822833]
	AT3G10020	AT3G10020	plant/protein [Source:NCBI gene (formerly Entrezgene);Acc:820163]
	AT3G58670	AT3G58670	2-aminoethanethiol dioxygenase, putative (DUF1637) [Source:NCBI gene (formerly Entrezgene);Acc:825036]
	AT4G27460	CBSX5	Cystathionine beta-synthase (CBS) family protein [Source:NCBI gene (formerly Entrezgene);Acc:828855]
	AT3G13310	AT3G13310	Chaperone DnaJ-domain superfamily protein [Source:NCBI gene (formerly Entrezgene);Acc:820531]
	AT4G33560	AT4G33560	Wound-responsive family protein [Source:NCBI gene (formerly Entrezgene);Acc:829495]
	AT1G43800	FTM1	Plant stearoyl-acyl-carrier-protein desaturase family protein [Source:NCBI gene (formerly Entrezgene);Acc:840977]
	AT5G19550	ASP2	aspartate aminotransferase 2 [Source:NCBI gene (formerly Entrezgene);Acc:832075]
	AT2G41430	ERD15	dehydration-induced protein (ERD15) [Source:NCBI gene (formerly Entrezgene);Acc:818741]
	AT3G10040	AT3G10040	sequence-specific DNA binding transcription factor [Source:NCBI gene (formerly Entrezgene);Acc:820165]
	AT5G20230	BCB	blue-copper-binding protein [Source:NCBI gene (formerly Entrezgene);Acc:832145]
	AT1G25560	TEM1	AP2/B3 transcription factor family protein [Source:NCBI gene (formerly Entrezgene);Acc:839143]
	AT1G13300	HRS1	myb-like transcription factor family protein [Source:NCBI gene (formerly Entrezgene);Acc:837890]
	AT3G02555	AT3G02555
	AT3G14100	AT3G14100	RNA-binding (RRM/RBD/RNP motifs) family protein [Source:NCBI gene (formerly Entrezgene);Acc:820626]
	AT1G25550	AT1G25550	myb-like transcription factor family protein [Source:NCBI gene (formerly Entrezgene);Acc:839142]
	AT2G16060	HB1	hemoglobin 1 [Source:NCBI gene (formerly Entrezgene);Acc:816103]
	AT5G64260	EXL2	EXORDIUM like 2 [Source:NCBI gene (formerly Entrezgene);Acc:836547]
	AT3G03270	AT3G03270	Adenine nucleotide alpha hydrolases-like superfamily protein [Source:NCBI gene (formerly Entrezgene);Acc:821303]
	AT3G50440	MES10	methylesterase [Source:NCBI gene (formerly Entrezgene);Acc:824208]
	AT2G31810	AT2G31810	ACT domain-containing small subunit of acetolactate synthase protein [Source:NCBI gene (formerly Entrezgene);Acc:817738]
	AT1G69890	AT1G69890	actin cross-linking protein (DUF569) [Source:NCBI gene (formerly Entrezgene);Acc:843325]
	AT3G14230	RAP2.2	related to AP2 2 [Source:NCBI gene (formerly Entrezgene);Acc:820643]
	AT1G59660	AT1G59660	Nucleoporin autopeptidase [Source:NCBI gene (formerly Entrezgene);Acc:842256]
Group VIIh	AT1G35140	PHI-1	Phosphate-responsive 1 family protein [Source:NCBI gene (formerly Entrezgene);Acc:840399]
	AT4G01250	WRKY22	WRKY family transcription factor [Source:NCBI gene (formerly Entrezgene);Acc:827896]
	AT1G15010	AT1G15010	mediator of RNA polymerase II transcription subunit [Source:NCBI gene (formerly Entrezgene);Acc:838066]
	AT4G30280	XTH18	xyloglucan endotransglucosylase/hydrolase 18 [Source:NCBI gene (formerly Entrezgene);Acc:829151]
	AT1G26270	AT1G26270	Phosphatidylinositol 3- and 4-kinase family protein [Source:NCBI gene (formerly Entrezgene);Acc:839168]
	AT5G66985	AT5G66985
	AT5G26920	CBP60G	Cam-binding protein 60-like G [Source:NCBI gene (formerly Entrezgene);Acc:832750]

## Sheet: Group I-h
GO- and Transcription Factor- Enrichment analyses of group-Ih genes
Gene Annotation			Root					Shoot
Gene ID	Symbol	Description	Col	adc1	OXPtADC	cdr7/cuao3	OXCuAO3	Col	adc1	OXPtADC	cdr7/cuao3	OXCuAO3
AT1G13360	AT1G13360		-0.359714	NS	NS	NS	NS	-0.534315	-0.626441	NS	NS	-0.373015
AT1G27730	STZ	salt tolerance zinc finger [Source:NCBI gene (formerly Entrezgene);Acc:839666]	-1.23227	NS	NS	NS	NS	-1.02375	NS	NS	NS	NS
AT1G61340	FBS1	F-box family protein [Source:NCBI gene (formerly Entrezgene);Acc:842428]	-1.614	NS	NS	NS	-0.951635	-0.804026	NS	NS	NS	NS
AT1G67360	AT1G67360	Rubber elongation factor protein (REF) [Source:NCBI gene (formerly Entrezgene);Acc:843057]	-0.984369	-1.22518	-0.992295	-1.29636	-1.18544	-1.64593	-1.32453	-1.58111	-1.98064	-1.64585
AT1G72920	AT1G72920	Toll-Interleukin-Resistance (TIR) domain family protein [Source:NCBI gene (formerly Entrezgene);Acc:843623]	-1.26848	NS	NS	NS	NS	-1.71133	NS	NS	NS	NS
AT1G72940	AT1G72940	Toll-Interleukin-Resistance (TIR) domain-containing protein [Source:NCBI gene (formerly Entrezgene);Acc:843625]	-1.22863	NS	NS	NS	-1.23449	-0.553007	NS	NS	NS	NS
AT1G74310	HSP101	heat shock protein 101 [Source:NCBI gene (formerly Entrezgene);Acc:843771]	-1.01175	NS	NS	NS	-0.64944	-0.992132	-1.56581	NS	-1.52052	-1.35336
AT1G78070	AT1G78070	Transducin/WD40 repeat-like superfamily protein [Source:NCBI gene (formerly Entrezgene);Acc:844142]	-1.17368	NS	NS	NS	-0.980404	-1.09982	-0.772799	-1.18961	-1.74051	-1.32238
AT2G33590	CRL1	NAD(P)-binding Rossmann-fold superfamily protein [Source:NCBI gene (formerly Entrezgene);Acc:817925]	-0.327785	NS	NS	NS	NS	-0.635975	NS	NS	NS	NS
AT2G46400	WRKY46	WRKY DNA-binding protein 46 [Source:NCBI gene (formerly Entrezgene);Acc:819248]	-2.16951	NS	NS	-1.93969	-1.49764	-1.14013	NS	NS	NS	NS
AT2G47730	GSTF8	glutathione S-transferase phi 8 [Source:NCBI gene (formerly Entrezgene);Acc:819386]	-0.637825	NS	NS	-0.575679	NS	-0.584074	NS	NS	NS	NS
AT3G23170	AT3G23170		-0.750192	NS	NS	NS	NS	-0.966124	NS	NS	NS	NS
AT3G24500	MBF1C	multiprotein bridging factor 1C [Source:NCBI gene (formerly Entrezgene);Acc:822041]	-2.1699	NS	-1.22175	NS	-1.3655	-2.26076	-1.59248	NS	-1.69147	-1.16589
AT4G11660	AT-HSFB2B	winged-helix DNA-binding transcription factor family protein [Source:NCBI gene (formerly Entrezgene);Acc:826771]	-0.98163	NS	NS	NS	NS	-1.41756	-1.68886	-1.22537	-1.37975	-1.57451
AT4G24160	AT4G24160	alpha/beta-Hydrolases superfamily protein [Source:NCBI gene (formerly Entrezgene);Acc:828516]	-0.599985	NS	NS	NS	-0.423561	-0.705396	NS	NS	NS	NS
AT4G24570	DIC2	dicarboxylate carrier 2 [Source:NCBI gene (formerly Entrezgene);Acc:828559]	-2.31546	NS	NS	NS	-1.18139	-1.10425	NS	NS	NS	NS
AT4G27657	AT4G27657		-2.63086	NS	NS	NS	-1.77191	-1.7931	-1.02751	NS	-1.93944	-0.956491
AT4G34150	AT4G34150	Calcium-dependent lipid-binding (CaLB domain) family protein [Source:NCBI gene (formerly Entrezgene);Acc:829563]	-1.16402	NS	NS	NS	NS	-0.740794	NS	NS	NS	NS
AT5G05410	DREB2A	DRE-binding protein 2A [Source:NCBI gene (formerly Entrezgene);Acc:830424]	-2.14758	NS	NS	NS	-1.06277	-0.78266	NS	NS	-1.09028	NS
AT5G06320	NHL3	NDR1/HIN1-like 3 [Source:NCBI gene (formerly Entrezgene);Acc:830520]	-0.941364	NS	NS	NS	NS	-0.714283	NS	NS	NS	NS
AT5G35735	AT5G35735	Auxin-responsive family protein [Source:NCBI gene (formerly Entrezgene);Acc:833550]	-1.13754	NS	NS	NS	-0.489137	-0.554132	NS	NS	NS	NS
AT5G42380	CML37	calmodulin like 37 [Source:NCBI gene (formerly Entrezgene);Acc:834244]	-1.79016	NS	NS	NS	NS	-1.53749	NS	NS	NS	NS
AT5G47910	RBOHD	respiratory burst oxidase homologue D [Source:NCBI gene (formerly Entrezgene);Acc:834842]	-0.459842	NS	NS	NS	NS	-0.477507	NS	NS	NS	NS
AT5G54470	BBX29	B-box type zinc finger family protein [Source:NCBI gene (formerly Entrezgene);Acc:835535]	-2.96809	-1.64262	NS	-2.41736	-2.92867	-2.51079	-2.09653	-1.92978	-1.83463	-2.30993
AT5G54960	PDC2	pyruvate decarboxylase-2 [Source:NCBI gene (formerly Entrezgene);Acc:835587]	-0.544887	NS	NS	-0.481956	-0.427659	-0.411601	NS	NS	NS	NS
AT5G58070	TIL	temperature-induced lipocalin [Source:NCBI gene (formerly Entrezgene);Acc:835919]	-0.984625	-0.590121	-0.551343	-0.701718	-0.532809	-0.828341	NS	NS	NS	NS
GO enrichment analysis
GO-BP
Enrichment FDR	nGenes	Biological Process (BP)	Pathway Genes	Fold Enrichment
8.6114e-53	26	cellular response to hypoxia	240	115.117
8.6114e-53	26	cellular response to decreased oxygen levels	242	114.165
9.52349e-52	26	response to hypoxia	267	103.476
1.05337e-51	26	response to oxygen levels	272	101.574
2.6715e-06	6	response to heat	264	24.1503
3.74548e-05	5	response to wounding	233	22.8029
6.27675e-34	26	cellular response to stress	1272	21.7201
1.50955e-07	8	response to acid chemical	459	18.5205
1.90142e-06	7	response to water deprivation	418	17.795
2.12657e-06	7	response to water	429	17.3387
4.4105e-09	10	response to temperature stimulus	648	16.3984
4.32604e-30	26	cellular response to chemical stimulus	1791	15.426
5.83836e-28	26	response to abiotic stimulus	2170	12.7318
7.63512e-06	8	response to inorganic substance	790	10.7607
5.42832e-24	26	response to chemical	3091	8.93821
2.77341e-21	26	response to stress	3953	6.98912
2.45012e-05	10	response to oxygen-containing compound	1679	6.32886
GO-MF
Enrichment FDR	nGenes	Molecular Function (MF)	Pathway Genes	Fold Enrichment
0.0454728	1	thiosulfate transmembrane transporter activity	3	354.205
0.0454728	1	pyruvate decarboxylase activity	4	265.654
0.0454728	1	succinate transmembrane transporter activity	4	265.654
0.0473016	1	oxaloacetate transmembrane transporter activity	5	212.523
0.0473016	1	1-acylglycerol-3-phosphate O-acyltransferase activity	7	151.802
0.0473016	1	phospholipase A2 activity	7	151.802
0.0473016	1	lysophosphatidic acid acyltransferase activity	7	151.802
0.0454728	2	sulfur compound binding	40	53.1308
0.0488388	2	peroxidase activity	136	15.6267
0.0454728	5	transcription cis-regulatory region binding	979	5.42704
0.0454728	5	transcription regulatory region nucleic acid binding	979	5.42704
0.0454728	5	sequence-specific double-stranded DNA binding	998	5.32372
0.0454728	5	double-stranded DNA binding	1112	4.77795
0.0473016	5	sequence-specific DNA binding	1270	4.18353
0.0454728	6	DNA-binding transcription factor activity	1660	3.84078
0.0473016	6	transcription regulator activity	1814	3.51471
GO-CC
Enrichment FDR	nGenes	Cellular Component (CC)	Pathway Genes	Fold Enrichment
NS
Transcription factor enrichment analysis
TF-AGRIS
Enrichment FDR	nGenes	Pathways	Pathway Genes	Fold Enrichment
NS

## Sheet: Group II-h
GO- and Transcription Factor- Enrichment analyses of group-IIh genes													Predicted TF Target Element						*: Zubrycka et al. (2023) Nature Communications 14: 4665.
Gene Annotation			Root					Shoot											Responsive to ERF transcription factors *	Promoter binding to ERF*
Gene ID	Symbol	Description	Col	adc1	OXPtADC	cdr7/cuao3	OXCuAO3	Col	adc1	OXPtADC	cdr7/cuao3	OXCuAO3	ATBHLH15	BZIP16	ABF2	GBF5	ABI5	AT5G29000
AT1G03220	SAP2	Eukaryotic aspartyl protease family protein [Source:NCBI gene (formerly Entrezgene);Acc:838517]	0.514611	0.60014	NS	NS	0.558749	1.13617	1.37009	0.707567	0.991562	1.09712	x						Yes	Yes
AT1G10140	AT1G10140	Uncharacterized conserved protein UCP031279 [Source:NCBI gene (formerly Entrezgene);Acc:837551]	0.517696	0.799042	0.920556	0.470485	0.954927	1.37038	1.67264	1.41604	1.54162	2.26538							Yes
AT1G19530	AT1G19530	DNA polymerase epsilon catalytic subunit A [Source:NCBI gene (formerly Entrezgene);Acc:838540]	1.12946	1.68962	NS	1.57148	1.8278	4.15995	3.64416	NS	5.96683	3.61439			x		x		Yes
AT1G26380	AT1G26380	FAD-binding Berberine family protein [Source:NCBI gene (formerly Entrezgene);Acc:839180]	1.64375	2.76832	NS	NS	1.4951	4.45471	3.36405	2.20715	2.98345	2.93212			x		x		Yes
AT1G30720	AT1G30720	FAD-binding Berberine family protein [Source:NCBI gene (formerly Entrezgene);Acc:839952]	1.10959	1.17814	NS	1.47432	1.3096	2.3978	3.51346	2.56619	NS	2.55446		x		x	x		Yes
AT1G33055	HUP32		1.67	2.64	2.28	1.87	2.28	4.39	5.29	3.77	4.39	4.91						x	Yes	Yes
AT1G55810	UKL3	uridine kinase-like 3 [Source:NCBI gene (formerly Entrezgene);Acc:842031]	0.4276	NS	NS	0.65518	0.438265	1.57092	1.4864	1.21708	1.77268	1.43796				x			Yes
AT1G72330	ALAAT2	alanine aminotransferase 2 [Source:NCBI gene (formerly Entrezgene);Acc:843565]	0.721824	NS	NS	NS	NS	0.540338	0.729292	0.712484	0.635097	0.772975
AT1G72360	ERF73,HRE1	Integrase-type DNA-binding superfamily protein [Source:NCBI gene (formerly Entrezgene);Acc:843568]	0.581454	NS	NS	NS	0.511712	0.870354	0.998069	NS	NS	1.03138						x	Yes
AT1G77120	ADH1	alcohol dehydrogenase 1 [Source:NCBI gene (formerly Entrezgene);Acc:844047]	0.532095	NS	NS	NS	NS	2.11262	1.52109	1.65078	NS	1.09798		x	x	x	x	x	Yes	Yes
AT2G15890	MEE14	maternal effect embryo arrest 14 [Source:NCBI gene (formerly Entrezgene);Acc:816085]	1.11793	1.76132	1.16799	1.09687	1.9061	2.34691	2.23377	2.13815	2.22094	2.84466							Yes
AT2G18670	AT2G18670	RING/U-box superfamily protein [Source:NCBI gene (formerly Entrezgene);Acc:816382]	0.933587	NS	NS	NS	1.28405	1.87264	1.36626	1.49838	1.81596	1.63084					x	x	Yes
AT2G26560	PLA2A	phospholipase A 2A [Source:NCBI gene (formerly Entrezgene);Acc:817197]	1.82264	3.21519	NS	NS	1.72769	2.70837	2.95649	1.36051	2.57627	4.03346							Yes	Yes
AT3G02040	SRG3	senescence-related 3 [Source:NCBI gene (formerly Entrezgene);Acc:821175]	2.50243	2.29252	1.7549	NS	2.63314	2.08585	2.15427	2.20635	1.78341	2.4049	x	x	x	x	x	x	Yes
AT3G02550	LBD41	LOB domain-containing protein 41 [Source:NCBI gene (formerly Entrezgene);Acc:821112]	0.676088	NS	NS	NS	NS	2.51623	3.87131	2.88306	2.86377	3.4092	x	x	x		x		Yes	Yes
AT3G06435	AT3G06435	Expressed protein [Source:NCBI gene (formerly Entrezgene);Acc:28718918]	0.828527	1.07931	0.833792	NS	0.978074	1.34144	1.17007	NS	1.80328	1.10926							Yes
AT3G07350	F21O3.6		1.44402	1.79088	NS	0.693763	1.59054	1.46129	2.04031	2.08879	1.6331	2.31358			x	x	x	x	Yes	Yes
AT3G23150	ETR2	Signal transduction histidine kinase, hybrid-type, ethylene sensor [Source:NCBI gene (formerly Entrezgene);Acc:821891]	0.625625	0.911857	1.19289	NS	0.60535	1.38532	1.15952	1.39903	1.5637	1.83477
AT3G43190	SUS4	sucrose synthase 4 [Source:NCBI gene (formerly Entrezgene);Acc:823393]	1.02331	NS	0.950768	NS	0.725769	1.72622	1.59982	NS	NS	NS						x	Yes
AT3G49780	PSK4	phytosulfokine 4 [Source:NCBI gene (formerly Entrezgene);Acc:824140]	0.631446	0.981872	0.96521	NS	0.799516	0.871665	1.50804	NS	NS	1.45572						x	Yes
AT4G24230	ACBP3	acyl-CoA-binding domain 3 [Source:NCBI gene (formerly Entrezgene);Acc:828524]	0.943002	1.00908	NS	0.931858	1.14392	2.46922	2.66656	2.02124	2.63125	2.98346							Yes
AT4G27450	AT4G27450	aluminum induced protein with YGL and LRDR motifs [Source:NCBI gene (formerly Entrezgene);Acc:828854]	1.42851	1.61431	1.42833	1.84388	1.49679	3.78159	3.58038	3.20552	4.17638	4.09953	x
AT4G32480	AT4G32480	sugar phosphate exchanger, putative (DUF506) [Source:NCBI gene (formerly Entrezgene);Acc:829383]	1.89349	2.20656	1.67828	1.91341	2.5272	1.42046	2.08046	1.78032	1.57838	2.47051	x	x	x	x	x	x	Yes
AT4G38470	STY46	ACT-like protein tyrosine kinase family protein [Source:NCBI gene (formerly Entrezgene);Acc:830003]	0.566397	0.835118	0.883277	0.895212	0.980994	1.54665	1.87593	1.23171	1.50733	2.0059					x	x	Yes
AT5G03730	CTR1	Protein kinase superfamily protein [Source:NCBI gene (formerly Entrezgene);Acc:831748]	0.276806	NS	NS	NS	NS	1.11053	0.925224	0.740161	1.00685	1.03299		x	x	x	x		No
AT5G15120	HUP29, PCO1	2-aminoethanethiol dioxygenase, putative (DUF1637) [Source:NCBI gene (formerly Entrezgene);Acc:831364]	0.57	NS	NS	NS	NS	2.76	2.86	2.07	2.65	3.37		x	x	x	x		Yes	Yes
AT5G19120	AT5G19120	Eukaryotic aspartyl protease family protein [Source:NCBI gene (formerly Entrezgene);Acc:832032]	1.3096	1.59122	1.3405	1.27642	1.58332	2.18015	2.52526	2.09212	2.52451	2.88855						x	Yes
AT5G20250	DIN10	Raffinose synthase family protein [Source:NCBI gene (formerly Entrezgene);Acc:832147]	1.03793	1.38701	NS	1.41241	1.26544	2.56603	2.64209	2.38971	2.81222	2.74494		x	x	x	x		Yes	Yes
AT5G25250	FLOT1	SPFH/Band 7/PHB domain-containing membrane-associated protein family [Source:NCBI gene (formerly Entrezgene);Acc:832596]	0.969803	NS	NS	NS	NS	0.787215	NS	NS	NS	2.09426							Yes	Yes
AT5G39890	AT5G39890	2-aminoethanethiol dioxygenase, putative (DUF1637) [Source:NCBI gene (formerly Entrezgene);Acc:833986]	0.635638	NS	NS	NS	NS	3.69879	3.43404	2.15757	3.09986	2.65957						x	Yes	Yes
AT5G41080	GDPD2	PLC-like phosphodiesterases superfamily protein [Source:NCBI gene (formerly Entrezgene);Acc:834110]	0.892915	0.691382	NS	0.711912	0.991982	1.57603	2.14603	NS	NS	1.89162		x		x	x	x	Yes
AT5G57220	CYP81F2	cytochrome P450, family 81, subfamily F, polypeptide 2 [Source:NCBI gene (formerly Entrezgene);Acc:835828]	1.49334	1.94334	NS	NS	1.20874	1.87299	2.73552	1.07176	1.6084	3.02254							Yes
GO enrichment analysis
GO-BP
Enrichment FDR	nGenes	Biological Process (BP)	Pathway Genes	Fold Enrichment
0.000112988	2	glycerophospholipid catabolic proc.	3	575.583
0.000329072	2	protein oxidation	5	345.35
0.000329072	2	peptidyl-cysteine oxidation	5	345.35
0.000438445	2	detection of oxygen	6	287.792
0.000438445	2	detection of hypoxia	6	287.792
3.68503e-06	3	anaerobic respiration	9	287.792
0.000994723	2	glycerolipid catabolic proc.	9	191.861
9.67681e-59	30	cellular response to hypoxia	240	107.922
9.67681e-59	30	cellular response to decreased oxygen levels	242	107.03
1.25258e-63	32	response to hypoxia	267	103.476
1.25258e-63	32	response to decreased oxygen levels	271	101.948
1.4843e-36	30	cellular response to stress	1272	20.3626
1.60643e-34	31	cellular response to chemical stimulus	1791	14.944
1.60643e-34	32	response to abiotic stimulus	2170	12.7318
3.29097e-27	31	response to chemical	3091	8.65889
2.89056e-26	32	response to stress	3953	6.98912
0.00316238	9	small molecule metabolic proc.	1813	4.28592
GO-MF
Enrichment FDR	nGenes	Molecular Function (MF)	Pathway Genes	Fold Enrichment
0.0015173	2	cysteine dioxygenase activity	5	345.35
0.0405405	1	L-alanine:2-oxoglutarate aminotransferase activity	5	172.675
0.0405405	1	uridine kinase activity	5	172.675
0.0405405	1	ethylene receptor activity	5	172.675
0.0405405	1	galactinol-sucrose galactosyltransferase activity	5	172.675
0.0405405	1	alanine-oxo-acid transaminase activity	5	172.675
0.0405405	1	ethylene binding	5	172.675
0.0405405	1	alkene binding	5	172.675
0.0405405	1	fatty-acyl-CoA binding	6	143.896
0.0405405	1	uracil phosphoribosyltransferase activity	6	143.896
0.0405405	1	acyl-CoA binding	6	143.896
0.0405405	1	fatty acid derivative binding	6	143.896
0.00588329	2	glycerophosphodiester phosphodiesterase activity	13	132.827
0.0230799	2	oxidoreductase activity acting on single donors with incorporation of molecular oxygen in	31	55.7016
0.0405405	2	phosphoric diester hydrolase activity	56	30.8348
0.0405405	2	aspartic-type endopeptidase activity	75	23.0233
0.0405405	2	aspartic-type peptidase activity	75	23.0233
0.0405405	2	FAD binding	80	21.5844
0.0405405	10	small molecule binding	3360	2.56957
GO-CC
Enrichment FDR	nGenes	Cellular Component (CC)	Pathway Genes	Fold Enrichment
0.0451209	1	caveola	3	287.792
0.0451209	1	plasma membrane raft	3	287.792
0.0451209	1	membrane raft	3	287.792
Transcription factor enrichment analysis
TF-AGRIS
Enrichment FDR	nGenes	Transcription Factror Binding Site	Pathway Genes	Fold Enrichment
0.0404249	5	ATBHLH15 target	749	5.76352
0.00528394	9	BZIP16 target	1631	4.76418
0.00528394	10	ABF2 target	2112	4.08795
0.00623619	10	GBF5 target	2268	3.80677
0.00528394	14	ABI5 target	4189	2.88547
0.0103286	13	AT5G29000 target	4077	2.75297
			Root					Shoot
TF target	Gene ID	Annotation	Col	adc1	OXPtADC	cdr7/cuao3	OXCuAO3	Col	adc1	OXPtADC	cdr7/cuao3	OXCuAO3
ATBHLH15 target
AT1G03220	AT1G03220	Eukaryotic aspartyl protease family protein; FUNCTIONS IN: aspartic-type endopeptidase activity; INVOLVED IN: response to salt stress; LOCATED IN: cell wall, plasma membrane, membrane, plant-type cell wall; EXPRESSED IN: 6 plant structures; CONTAINS InterPro DOMAIN/s: Peptidase aspartic (InterPro:IPR021109), Peptidase aspartic, catalytic (InterPro:IPR009007), Peptidase A1 (InterPro:IPR001461); BE…	0.514611	0.60014	NS	NS	0.558749	1.13617	1.37009	0.707567	0.991562	1.09712
SRG3	AT3G02040	senescence-related gene 3 (SRG3); FUNCTIONS IN: phosphoric diester hydrolase activity, glycerophosphodiester phosphodiesterase activity; INVOLVED IN: glycerol metabolic process, lipid metabolic process; EXPRESSED IN: 18 plant structures; EXPRESSED DURING: 8 growth stages; CONTAINS InterPro DOMAIN/s: PLC-like phosphodiesterase, TIM beta/alpha-barrel domain (InterPro:IPR017946), Glycerophosphoryl d…	2.50243	2.29252	1.7549	NS	2.63314	2.08585	2.15427	2.20635	1.78341	2.4049
LBD41	AT3G02550	LOB domain-containing protein 41 (LBD41); CONTAINS InterPro DOMAIN/s: Lateral organ boundaries, LOB (InterPro:IPR004883), Asymmetric leaves, AS2/LOB (InterPro:IPR017414); BEST Arabidopsis thaliana protein match is: LOB domain-containing protein 40 (TAIR:AT1G67100.1); Has 601 Blast hits to 600 proteins in 23 species: Archae - 0; Bacteria - 0; Metazoa - 0; Fungi - 0; Plants - 601; Viruses - 0; Othe…	0.676088	NS	NS	NS	NS	2.51623	3.87131	2.88306	2.86377	3.4092
AT4G27450	AT4G27450	Aluminium induced protein with YGL and LRDR motifs; FUNCTIONS IN: molecular_function unknown; INVOLVED IN: biological_process unknown; LOCATED IN: cytosol, nucleus, plasma membrane; EXPRESSED IN: 25 plant structures; EXPRESSED DURING: 14 growth stages; BEST Arabidopsis thaliana protein match is: Aluminium induced protein with YGL and LRDR motifs (TAIR:AT3G15450.1); Has 30201 Blast hits to 17322 p…	1.42851	1.61431	1.42833	1.84388	1.49679	3.78159	3.58038	3.20552	4.17638	4.09953
AT4G32480	AT4G32480	Protein of unknown function (DUF506) ; FUNCTIONS IN: molecular_function unknown; INVOLVED IN: biological_process unknown; LOCATED IN: cellular_component unknown; EXPRESSED IN: cultured cell; CONTAINS InterPro DOMAIN/s: Protein of unknown function DUF506, plant (InterPro:IPR006502); BEST Arabidopsis thaliana protein match is: Protein of unknown function (DUF506) (TAIR:AT2G20670.1); Has 1807 Blast …	1.89349	2.20656	1.67828	1.91341	2.5272	1.42046	2.08046	1.78032	1.57838	2.47051
BZIP16 target
AT1G30720	AT1G30720	FAD-binding Berberine family protein; FUNCTIONS IN: electron carrier activity, oxidoreductase activity, FAD binding, catalytic activity; LOCATED IN: endomembrane system; CONTAINS InterPro DOMAIN/s: FAD-binding, type 2 (InterPro:IPR016166), Berberine/berberine-like (InterPro:IPR012951), FAD linked oxidase, N-terminal (InterPro:IPR006094); BEST Arabidopsis thaliana protein match is: FAD-binding Ber…	1.10959	1.17814	NS	1.47432	1.3096	2.3978	3.51346	2.56619	NS	2.55446
ADH1	AT1G77120	alcohol dehydrogenase 1 (ADH1); FUNCTIONS IN: alcohol dehydrogenase (NAD) activity; INVOLVED IN: response to cadmium ion, cellular respiration, response to salt stress, response to hypoxia, response to osmotic stress; LOCATED IN: cytosol, plasma membrane; EXPRESSED IN: 24 plant structures; EXPRESSED DURING: 12 growth stages; CONTAINS InterPro DOMAIN/s: GroES-like (InterPro:IPR011032), Alcohol deh…	0.532095	NS	NS	NS	NS	2.11262	1.52109	1.65078	NS	1.09798
SRG3	AT3G02040	senescence-related gene 3 (SRG3); FUNCTIONS IN: phosphoric diester hydrolase activity, glycerophosphodiester phosphodiesterase activity; INVOLVED IN: glycerol metabolic process, lipid metabolic process; EXPRESSED IN: 18 plant structures; EXPRESSED DURING: 8 growth stages; CONTAINS InterPro DOMAIN/s: PLC-like phosphodiesterase, TIM beta/alpha-barrel domain (InterPro:IPR017946), Glycerophosphoryl d…	2.50243	2.29252	1.7549	NS	2.63314	2.08585	2.15427	2.20635	1.78341	2.4049
LBD41	AT3G02550	LOB domain-containing protein 41 (LBD41); CONTAINS InterPro DOMAIN/s: Lateral organ boundaries, LOB (InterPro:IPR004883), Asymmetric leaves, AS2/LOB (InterPro:IPR017414); BEST Arabidopsis thaliana protein match is: LOB domain-containing protein 40 (TAIR:AT1G67100.1); Has 601 Blast hits to 600 proteins in 23 species: Archae - 0; Bacteria - 0; Metazoa - 0; Fungi - 0; Plants - 601; Viruses - 0; Othe…	0.676088	NS	NS	NS	NS	2.51623	3.87131	2.88306	2.86377	3.4092
AT4G32480	AT4G32480	Protein of unknown function (DUF506) ; FUNCTIONS IN: molecular_function unknown; INVOLVED IN: biological_process unknown; LOCATED IN: cellular_component unknown; EXPRESSED IN: cultured cell; CONTAINS InterPro DOMAIN/s: Protein of unknown function DUF506, plant (InterPro:IPR006502); BEST Arabidopsis thaliana protein match is: Protein of unknown function (DUF506) (TAIR:AT2G20670.1); Has 1807 Blast …	1.89349	2.20656	1.67828	1.91341	2.5272	1.42046	2.08046	1.78032	1.57838	2.47051
CTR1	AT5G03730	CONSTITUTIVE TRIPLE RESPONSE 1 (CTR1); CONTAINS InterPro DOMAIN/s: Protein kinase, ATP binding site (InterPro:IPR017441), Serine/threonine-protein kinase domain (InterPro:IPR002290), Serine-threonine/tyrosine-protein kinase (InterPro:IPR001245), Protein kinase-like domain (InterPro:IPR011009), Serine/threonine-protein kinase, active site (InterPro:IPR008271), Protein kinase, catalytic domain (Int…	0.276806	NS	NS	NS	NS	1.11053	0.925224	0.740161	1.00685	1.03299
AT5G15120	AT5G15120	Protein of unknown function (DUF1637); FUNCTIONS IN: cysteamine dioxygenase activity; INVOLVED IN: anaerobic respiration; LOCATED IN: cellular_component unknown; EXPRESSED IN: 20 plant structures; EXPRESSED DURING: 8 growth stages; CONTAINS InterPro DOMAIN/s: Protein of unknown function DUF1637 (InterPro:IPR012864); BEST Arabidopsis thaliana protein match is: Protein of unknown function (DUF1637)…	0.568691	NS	NS	NS	NS	2.75753	2.8606	2.07398	2.65035	3.37257
DIN10	AT5G20250	DARK INDUCIBLE 10 (DIN10); FUNCTIONS IN: hydrolase activity, hydrolyzing O-glycosyl compounds; INVOLVED IN: response to karrikin, aging, response to light stimulus, response to cold, response to sucrose stimulus; LOCATED IN: chloroplast; EXPRESSED IN: 25 plant structures; EXPRESSED DURING: 14 growth stages; CONTAINS InterPro DOMAIN/s: Glycoside hydrolase, catalytic core (InterPro:IPR017853), Raff…	1.03793	1.38701	NS	1.41241	1.26544	2.56603	2.64209	2.38971	2.81222	2.74494
GDPD2	AT5G41080	PLC-like phosphodiesterases superfamily protein; FUNCTIONS IN: phosphoric diester hydrolase activity, glycerophosphodiester phosphodiesterase activity; INVOLVED IN: glycerol metabolic process, lipid metabolic process; EXPRESSED IN: 23 plant structures; EXPRESSED DURING: 14 growth stages; CONTAINS InterPro DOMAIN/s: PLC-like phosphodiesterase, TIM beta/alpha-barrel domain (InterPro:IPR017946), Gly…	0.892915	0.691382	NS	0.711912	0.991982	1.57603	2.14603	NS	NS	1.89162
ABF2 target
AT1G19530	AT1G19530	unknown protein; FUNCTIONS IN: molecular_function unknown; INVOLVED IN: N-terminal protein myristoylation, anaerobic respiration; LOCATED IN: cellular_component unknown; EXPRESSED IN: leaf apex, inflorescence meristem, hypocotyl, root, flower; EXPRESSED DURING: petal differentiation and expansion stage; Has 47 Blast hits to 47 proteins in 13 species: Archae - 0; Bacteria - 0; Metazoa - 0; Fungi -…	1.12946	1.68962	NS	1.57148	1.8278	4.15995	3.64416	NS	5.96683	3.61439
AT1G26380	AT1G26380	FAD-binding Berberine family protein; FUNCTIONS IN: electron carrier activity, oxidoreductase activity, FAD binding, catalytic activity; LOCATED IN: endomembrane system; EXPRESSED IN: 9 plant structures; EXPRESSED DURING: LP.06 six leaves visible, LP.04 four leaves visible, 4 anthesis, LP.08 eight leaves visible; CONTAINS InterPro DOMAIN/s: FAD-binding, type 2 (InterPro:IPR016166), Berberine/berb…	1.64375	2.76832	NS	NS	1.4951	4.45471	3.36405	2.20715	2.98345	2.93212
ADH1	AT1G77120	alcohol dehydrogenase 1 (ADH1); FUNCTIONS IN: alcohol dehydrogenase (NAD) activity; INVOLVED IN: response to cadmium ion, cellular respiration, response to salt stress, response to hypoxia, response to osmotic stress; LOCATED IN: cytosol, plasma membrane; EXPRESSED IN: 24 plant structures; EXPRESSED DURING: 12 growth stages; CONTAINS InterPro DOMAIN/s: GroES-like (InterPro:IPR011032), Alcohol deh…	0.532095	NS	NS	NS	NS	2.11262	1.52109	1.65078	NS	1.09798
SRG3	AT3G02040	senescence-related gene 3 (SRG3); FUNCTIONS IN: phosphoric diester hydrolase activity, glycerophosphodiester phosphodiesterase activity; INVOLVED IN: glycerol metabolic process, lipid metabolic process; EXPRESSED IN: 18 plant structures; EXPRESSED DURING: 8 growth stages; CONTAINS InterPro DOMAIN/s: PLC-like phosphodiesterase, TIM beta/alpha-barrel domain (InterPro:IPR017946), Glycerophosphoryl d…	2.50243	2.29252	1.7549	NS	2.63314	2.08585	2.15427	2.20635	1.78341	2.4049
LBD41	AT3G02550	LOB domain-containing protein 41 (LBD41); CONTAINS InterPro DOMAIN/s: Lateral organ boundaries, LOB (InterPro:IPR004883), Asymmetric leaves, AS2/LOB (InterPro:IPR017414); BEST Arabidopsis thaliana protein match is: LOB domain-containing protein 40 (TAIR:AT1G67100.1); Has 601 Blast hits to 600 proteins in 23 species: Archae - 0; Bacteria - 0; Metazoa - 0; Fungi - 0; Plants - 601; Viruses - 0; Othe…	0.676088	NS	NS	NS	NS	2.51623	3.87131	2.88306	2.86377	3.4092
F21O3.6	AT3G07350	Protein of unknown function (DUF506) ; CONTAINS InterPro DOMAIN/s: Protein of unknown function DUF506, plant (InterPro:IPR006502); BEST Arabidopsis thaliana protein match is: Protein of unknown function (DUF506) (TAIR:AT3G25240.1); Has 393 Blast hits to 390 proteins in 24 species: Archae - 0; Bacteria - 0; Metazoa - 0; Fungi - 0; Plants - 391; Viruses - 0; Other Eukaryotes - 2 (source: NCBI BLink…	1.44402	1.79088	NS	0.693763	1.59054	1.46129	2.04031	2.08879	1.6331	2.31358
AT4G32480	AT4G32480	Protein of unknown function (DUF506) ; FUNCTIONS IN: molecular_function unknown; INVOLVED IN: biological_process unknown; LOCATED IN: cellular_component unknown; EXPRESSED IN: cultured cell; CONTAINS InterPro DOMAIN/s: Protein of unknown function DUF506, plant (InterPro:IPR006502); BEST Arabidopsis thaliana protein match is: Protein of unknown function (DUF506) (TAIR:AT2G20670.1); Has 1807 Blast …	1.89349	2.20656	1.67828	1.91341	2.5272	1.42046	2.08046	1.78032	1.57838	2.47051
CTR1	AT5G03730	CONSTITUTIVE TRIPLE RESPONSE 1 (CTR1); CONTAINS InterPro DOMAIN/s: Protein kinase, ATP binding site (InterPro:IPR017441), Serine/threonine-protein kinase domain (InterPro:IPR002290), Serine-threonine/tyrosine-protein kinase (InterPro:IPR001245), Protein kinase-like domain (InterPro:IPR011009), Serine/threonine-protein kinase, active site (InterPro:IPR008271), Protein kinase, catalytic domain (Int…	0.276806	NS	NS	NS	NS	1.11053	0.925224	0.740161	1.00685	1.03299
AT5G15120	AT5G15120	Protein of unknown function (DUF1637); FUNCTIONS IN: cysteamine dioxygenase activity; INVOLVED IN: anaerobic respiration; LOCATED IN: cellular_component unknown; EXPRESSED IN: 20 plant structures; EXPRESSED DURING: 8 growth stages; CONTAINS InterPro DOMAIN/s: Protein of unknown function DUF1637 (InterPro:IPR012864); BEST Arabidopsis thaliana protein match is: Protein of unknown function (DUF1637)…	0.568691	NS	NS	NS	NS	2.75753	2.8606	2.07398	2.65035	3.37257
DIN10	AT5G20250	DARK INDUCIBLE 10 (DIN10); FUNCTIONS IN: hydrolase activity, hydrolyzing O-glycosyl compounds; INVOLVED IN: response to karrikin, aging, response to light stimulus, response to cold, response to sucrose stimulus; LOCATED IN: chloroplast; EXPRESSED IN: 25 plant structures; EXPRESSED DURING: 14 growth stages; CONTAINS InterPro DOMAIN/s: Glycoside hydrolase, catalytic core (InterPro:IPR017853), Raff…	1.03793	1.38701	NS	1.41241	1.26544	2.56603	2.64209	2.38971	2.81222	2.74494
GBF5 target
AT1G30720	AT1G30720	FAD-binding Berberine family protein; FUNCTIONS IN: electron carrier activity, oxidoreductase activity, FAD binding, catalytic activity; LOCATED IN: endomembrane system; CONTAINS InterPro DOMAIN/s: FAD-binding, type 2 (InterPro:IPR016166), Berberine/berberine-like (InterPro:IPR012951), FAD linked oxidase, N-terminal (InterPro:IPR006094); BEST Arabidopsis thaliana protein match is: FAD-binding Ber…	1.10959	1.17814	NS	1.47432	1.3096	2.3978	3.51346	2.56619	NS	2.55446
UKL3	AT1G55810	uridine kinase-like 3 (UKL3); FUNCTIONS IN: uracil phosphoribosyltransferase activity, phosphotransferase activity, alcohol group as acceptor, kinase activity, ATP binding; INVOLVED IN: biosynthetic process, metabolic process; LOCATED IN: cellular_component unknown; EXPRESSED IN: 22 plant structures; EXPRESSED DURING: 13 growth stages; CONTAINS InterPro DOMAIN/s: Phosphoribulokinase/uridine kinas…	0.4276	NS	NS	0.65518	0.438265	1.57092	1.4864	1.21708	1.77268	1.43796
ADH1	AT1G77120	alcohol dehydrogenase 1 (ADH1); FUNCTIONS IN: alcohol dehydrogenase (NAD) activity; INVOLVED IN: response to cadmium ion, cellular respiration, response to salt stress, response to hypoxia, response to osmotic stress; LOCATED IN: cytosol, plasma membrane; EXPRESSED IN: 24 plant structures; EXPRESSED DURING: 12 growth stages; CONTAINS InterPro DOMAIN/s: GroES-like (InterPro:IPR011032), Alcohol deh…	0.532095	NS	NS	NS	NS	2.11262	1.52109	1.65078	NS	1.09798
SRG3	AT3G02040	senescence-related gene 3 (SRG3); FUNCTIONS IN: phosphoric diester hydrolase activity, glycerophosphodiester phosphodiesterase activity; INVOLVED IN: glycerol metabolic process, lipid metabolic process; EXPRESSED IN: 18 plant structures; EXPRESSED DURING: 8 growth stages; CONTAINS InterPro DOMAIN/s: PLC-like phosphodiesterase, TIM beta/alpha-barrel domain (InterPro:IPR017946), Glycerophosphoryl d…	2.50243	2.29252	1.7549	NS	2.63314	2.08585	2.15427	2.20635	1.78341	2.4049
F21O3.6	AT3G07350	Protein of unknown function (DUF506) ; CONTAINS InterPro DOMAIN/s: Protein of unknown function DUF506, plant (InterPro:IPR006502); BEST Arabidopsis thaliana protein match is: Protein of unknown function (DUF506) (TAIR:AT3G25240.1); Has 393 Blast hits to 390 proteins in 24 species: Archae - 0; Bacteria - 0; Metazoa - 0; Fungi - 0; Plants - 391; Viruses - 0; Other Eukaryotes - 2 (source: NCBI BLink…	1.44402	1.79088	NS	0.693763	1.59054	1.46129	2.04031	2.08879	1.6331	2.31358
AT4G32480	AT4G32480	Protein of unknown function (DUF506) ; FUNCTIONS IN: molecular_function unknown; INVOLVED IN: biological_process unknown; LOCATED IN: cellular_component unknown; EXPRESSED IN: cultured cell; CONTAINS InterPro DOMAIN/s: Protein of unknown function DUF506, plant (InterPro:IPR006502); BEST Arabidopsis thaliana protein match is: Protein of unknown function (DUF506) (TAIR:AT2G20670.1); Has 1807 Blast …	1.89349	2.20656	1.67828	1.91341	2.5272	1.42046	2.08046	1.78032	1.57838	2.47051
CTR1	AT5G03730	CONSTITUTIVE TRIPLE RESPONSE 1 (CTR1); CONTAINS InterPro DOMAIN/s: Protein kinase, ATP binding site (InterPro:IPR017441), Serine/threonine-protein kinase domain (InterPro:IPR002290), Serine-threonine/tyrosine-protein kinase (InterPro:IPR001245), Protein kinase-like domain (InterPro:IPR011009), Serine/threonine-protein kinase, active site (InterPro:IPR008271), Protein kinase, catalytic domain (Int…	0.276806	NS	NS	NS	NS	1.11053	0.925224	0.740161	1.00685	1.03299
AT5G15120	AT5G15120	Protein of unknown function (DUF1637); FUNCTIONS IN: cysteamine dioxygenase activity; INVOLVED IN: anaerobic respiration; LOCATED IN: cellular_component unknown; EXPRESSED IN: 20 plant structures; EXPRESSED DURING: 8 growth stages; CONTAINS InterPro DOMAIN/s: Protein of unknown function DUF1637 (InterPro:IPR012864); BEST Arabidopsis thaliana protein match is: Protein of unknown function (DUF1637)…	0.568691	NS	NS	NS	NS	2.75753	2.8606	2.07398	2.65035	3.37257
DIN10	AT5G20250	DARK INDUCIBLE 10 (DIN10); FUNCTIONS IN: hydrolase activity, hydrolyzing O-glycosyl compounds; INVOLVED IN: response to karrikin, aging, response to light stimulus, response to cold, response to sucrose stimulus; LOCATED IN: chloroplast; EXPRESSED IN: 25 plant structures; EXPRESSED DURING: 14 growth stages; CONTAINS InterPro DOMAIN/s: Glycoside hydrolase, catalytic core (InterPro:IPR017853), Raff…	1.03793	1.38701	NS	1.41241	1.26544	2.56603	2.64209	2.38971	2.81222	2.74494
GDPD2	AT5G41080	PLC-like phosphodiesterases superfamily protein; FUNCTIONS IN: phosphoric diester hydrolase activity, glycerophosphodiester phosphodiesterase activity; INVOLVED IN: glycerol metabolic process, lipid metabolic process; EXPRESSED IN: 23 plant structures; EXPRESSED DURING: 14 growth stages; CONTAINS InterPro DOMAIN/s: PLC-like phosphodiesterase, TIM beta/alpha-barrel domain (InterPro:IPR017946), Gly…	0.892915	0.691382	NS	0.711912	0.991982	1.57603	2.14603	NS	NS	1.89162
ABI5 target
AT1G19530	AT1G19530	unknown protein; FUNCTIONS IN: molecular_function unknown; INVOLVED IN: N-terminal protein myristoylation, anaerobic respiration; LOCATED IN: cellular_component unknown; EXPRESSED IN: leaf apex, inflorescence meristem, hypocotyl, root, flower; EXPRESSED DURING: petal differentiation and expansion stage; Has 47 Blast hits to 47 proteins in 13 species: Archae - 0; Bacteria - 0; Metazoa - 0; Fungi -…	1.12946	1.68962	NS	1.57148	1.8278	4.15995	3.64416	NS	5.96683	3.61439
AT1G26380	AT1G26380	FAD-binding Berberine family protein; FUNCTIONS IN: electron carrier activity, oxidoreductase activity, FAD binding, catalytic activity; LOCATED IN: endomembrane system; EXPRESSED IN: 9 plant structures; EXPRESSED DURING: LP.06 six leaves visible, LP.04 four leaves visible, 4 anthesis, LP.08 eight leaves visible; CONTAINS InterPro DOMAIN/s: FAD-binding, type 2 (InterPro:IPR016166), Berberine/berb…	1.64375	2.76832	NS	NS	1.4951	4.45471	3.36405	2.20715	2.98345	2.93212
AT1G30720	AT1G30720	FAD-binding Berberine family protein; FUNCTIONS IN: electron carrier activity, oxidoreductase activity, FAD binding, catalytic activity; LOCATED IN: endomembrane system; CONTAINS InterPro DOMAIN/s: FAD-binding, type 2 (InterPro:IPR016166), Berberine/berberine-like (InterPro:IPR012951), FAD linked oxidase, N-terminal (InterPro:IPR006094); BEST Arabidopsis thaliana protein match is: FAD-binding Ber…	1.10959	1.17814	NS	1.47432	1.3096	2.3978	3.51346	2.56619	NS	2.55446
ADH1	AT1G77120	alcohol dehydrogenase 1 (ADH1); FUNCTIONS IN: alcohol dehydrogenase (NAD) activity; INVOLVED IN: response to cadmium ion, cellular respiration, response to salt stress, response to hypoxia, response to osmotic stress; LOCATED IN: cytosol, plasma membrane; EXPRESSED IN: 24 plant structures; EXPRESSED DURING: 12 growth stages; CONTAINS InterPro DOMAIN/s: GroES-like (InterPro:IPR011032), Alcohol deh…	0.532095	NS	NS	NS	NS	2.11262	1.52109	1.65078	NS	1.09798
AT2G18670	AT2G18670	RING/U-box superfamily protein; FUNCTIONS IN: zinc ion binding; EXPRESSED IN: 21 plant structures; EXPRESSED DURING: 14 growth stages; CONTAINS InterPro DOMAIN/s: Zinc finger, RING-type (InterPro:IPR001841), Zinc finger, C3HC4 RING-type (InterPro:IPR018957); BEST Arabidopsis thaliana protein match is: RING/U-box superfamily protein (TAIR:AT4G30370.1); Has 8378 Blast hits to 8356 proteins in 272 s…	0.933587	NS	NS	NS	1.28405	1.87264	1.36626	1.49838	1.81596	1.63084
SRG3	AT3G02040	senescence-related gene 3 (SRG3); FUNCTIONS IN: phosphoric diester hydrolase activity, glycerophosphodiester phosphodiesterase activity; INVOLVED IN: glycerol metabolic process, lipid metabolic process; EXPRESSED IN: 18 plant structures; EXPRESSED DURING: 8 growth stages; CONTAINS InterPro DOMAIN/s: PLC-like phosphodiesterase, TIM beta/alpha-barrel domain (InterPro:IPR017946), Glycerophosphoryl d…	2.50243	2.29252	1.7549	NS	2.63314	2.08585	2.15427	2.20635	1.78341	2.4049
LBD41	AT3G02550	LOB domain-containing protein 41 (LBD41); CONTAINS InterPro DOMAIN/s: Lateral organ boundaries, LOB (InterPro:IPR004883), Asymmetric leaves, AS2/LOB (InterPro:IPR017414); BEST Arabidopsis thaliana protein match is: LOB domain-containing protein 40 (TAIR:AT1G67100.1); Has 601 Blast hits to 600 proteins in 23 species: Archae - 0; Bacteria - 0; Metazoa - 0; Fungi - 0; Plants - 601; Viruses - 0; Othe…	0.676088	NS	NS	NS	NS	2.51623	3.87131	2.88306	2.86377	3.4092
F21O3.6	AT3G07350	Protein of unknown function (DUF506) ; CONTAINS InterPro DOMAIN/s: Protein of unknown function DUF506, plant (InterPro:IPR006502); BEST Arabidopsis thaliana protein match is: Protein of unknown function (DUF506) (TAIR:AT3G25240.1); Has 393 Blast hits to 390 proteins in 24 species: Archae - 0; Bacteria - 0; Metazoa - 0; Fungi - 0; Plants - 391; Viruses - 0; Other Eukaryotes - 2 (source: NCBI BLink…	1.44402	1.79088	NS	0.693763	1.59054	1.46129	2.04031	2.08879	1.6331	2.31358
AT4G32480	AT4G32480	Protein of unknown function (DUF506) ; FUNCTIONS IN: molecular_function unknown; INVOLVED IN: biological_process unknown; LOCATED IN: cellular_component unknown; EXPRESSED IN: cultured cell; CONTAINS InterPro DOMAIN/s: Protein of unknown function DUF506, plant (InterPro:IPR006502); BEST Arabidopsis thaliana protein match is: Protein of unknown function (DUF506) (TAIR:AT2G20670.1); Has 1807 Blast …	1.89349	2.20656	1.67828	1.91341	2.5272	1.42046	2.08046	1.78032	1.57838	2.47051
STY46	AT4G38470	ACT-like protein tyrosine kinase family protein; FUNCTIONS IN: protein serine/threonine/tyrosine kinase activity, protein kinase activity; INVOLVED IN: protein amino acid phosphorylation, metabolic process; LOCATED IN: cytosol; EXPRESSED IN: 25 plant structures; EXPRESSED DURING: 15 growth stages; CONTAINS InterPro DOMAIN/s: Serine/threonine-protein kinase domain (InterPro:IPR002290), Amino acid-…	0.566397	0.835118	0.883277	0.895212	0.980994	1.54665	1.87593	1.23171	1.50733	2.0059
CTR1	AT5G03730	CONSTITUTIVE TRIPLE RESPONSE 1 (CTR1); CONTAINS InterPro DOMAIN/s: Protein kinase, ATP binding site (InterPro:IPR017441), Serine/threonine-protein kinase domain (InterPro:IPR002290), Serine-threonine/tyrosine-protein kinase (InterPro:IPR001245), Protein kinase-like domain (InterPro:IPR011009), Serine/threonine-protein kinase, active site (InterPro:IPR008271), Protein kinase, catalytic domain (Int…	0.276806	NS	NS	NS	NS	1.11053	0.925224	0.740161	1.00685	1.03299
AT5G15120	AT5G15120	Protein of unknown function (DUF1637); FUNCTIONS IN: cysteamine dioxygenase activity; INVOLVED IN: anaerobic respiration; LOCATED IN: cellular_component unknown; EXPRESSED IN: 20 plant structures; EXPRESSED DURING: 8 growth stages; CONTAINS InterPro DOMAIN/s: Protein of unknown function DUF1637 (InterPro:IPR012864); BEST Arabidopsis thaliana protein match is: Protein of unknown function (DUF1637)…	0.568691	NS	NS	NS	NS	2.75753	2.8606	2.07398	2.65035	3.37257
DIN10	AT5G20250	DARK INDUCIBLE 10 (DIN10); FUNCTIONS IN: hydrolase activity, hydrolyzing O-glycosyl compounds; INVOLVED IN: response to karrikin, aging, response to light stimulus, response to cold, response to sucrose stimulus; LOCATED IN: chloroplast; EXPRESSED IN: 25 plant structures; EXPRESSED DURING: 14 growth stages; CONTAINS InterPro DOMAIN/s: Glycoside hydrolase, catalytic core (InterPro:IPR017853), Raff…	1.03793	1.38701	NS	1.41241	1.26544	2.56603	2.64209	2.38971	2.81222	2.74494
GDPD2	AT5G41080	PLC-like phosphodiesterases superfamily protein; FUNCTIONS IN: phosphoric diester hydrolase activity, glycerophosphodiester phosphodiesterase activity; INVOLVED IN: glycerol metabolic process, lipid metabolic process; EXPRESSED IN: 23 plant structures; EXPRESSED DURING: 14 growth stages; CONTAINS InterPro DOMAIN/s: PLC-like phosphodiesterase, TIM beta/alpha-barrel domain (InterPro:IPR017946), Gly…	0.892915	0.691382	NS	0.711912	0.991982	1.57603	2.14603	NS	NS	1.89162
AT5G29000 target
AT1G33055	AT1G33055	unknown protein; FUNCTIONS IN: molecular_function unknown; INVOLVED IN: anaerobic respiration; LOCATED IN: endomembrane system; EXPRESSED IN: 13 plant structures; EXPRESSED DURING: 6 growth stages; Has 20 Blast hits to 20 proteins in 8 species: Archae - 0; Bacteria - 0; Metazoa - 0; Fungi - 0; Plants - 20; Viruses - 0; Other Eukaryotes - 0 (source: NCBI BLink).	1.67206	2.63628	2.28419	1.86619	2.27715	4.38742	5.29068	3.77345	4.38742	4.91432
ERF73	AT1G72360	HYPOXIA RESPONSIVE ERF (ETHYLENE RESPONSE FACTOR) 1 (HRE1); CONTAINS InterPro DOMAIN/s: DNA-binding, integrase-type (InterPro:IPR016177), Pathogenesis-related transcriptional factor/ERF, DNA-binding (InterPro:IPR001471); BEST Arabidopsis thaliana protein match is: Integrase-type DNA-binding superfamily protein (TAIR:AT2G47520.1); Has 6115 Blast hits to 5780 proteins in 251 species: Archae - 0; Ba…	0.581454	NS	NS	NS	0.511712	0.870354	0.998069	NS	NS	1.03138
ADH1	AT1G77120	alcohol dehydrogenase 1 (ADH1); FUNCTIONS IN: alcohol dehydrogenase (NAD) activity; INVOLVED IN: response to cadmium ion, cellular respiration, response to salt stress, response to hypoxia, response to osmotic stress; LOCATED IN: cytosol, plasma membrane; EXPRESSED IN: 24 plant structures; EXPRESSED DURING: 12 growth stages; CONTAINS InterPro DOMAIN/s: GroES-like (InterPro:IPR011032), Alcohol deh…	0.532095	NS	NS	NS	NS	2.11262	1.52109	1.65078	NS	1.09798
AT2G18670	AT2G18670	RING/U-box superfamily protein; FUNCTIONS IN: zinc ion binding; EXPRESSED IN: 21 plant structures; EXPRESSED DURING: 14 growth stages; CONTAINS InterPro DOMAIN/s: Zinc finger, RING-type (InterPro:IPR001841), Zinc finger, C3HC4 RING-type (InterPro:IPR018957); BEST Arabidopsis thaliana protein match is: RING/U-box superfamily protein (TAIR:AT4G30370.1); Has 8378 Blast hits to 8356 proteins in 272 s…	0.933587	NS	NS	NS	1.28405	1.87264	1.36626	1.49838	1.81596	1.63084
SRG3	AT3G02040	senescence-related gene 3 (SRG3); FUNCTIONS IN: phosphoric diester hydrolase activity, glycerophosphodiester phosphodiesterase activity; INVOLVED IN: glycerol metabolic process, lipid metabolic process; EXPRESSED IN: 18 plant structures; EXPRESSED DURING: 8 growth stages; CONTAINS InterPro DOMAIN/s: PLC-like phosphodiesterase, TIM beta/alpha-barrel domain (InterPro:IPR017946), Glycerophosphoryl d…	2.50243	2.29252	1.7549	NS	2.63314	2.08585	2.15427	2.20635	1.78341	2.4049
F21O3.6	AT3G07350	Protein of unknown function (DUF506) ; CONTAINS InterPro DOMAIN/s: Protein of unknown function DUF506, plant (InterPro:IPR006502); BEST Arabidopsis thaliana protein match is: Protein of unknown function (DUF506) (TAIR:AT3G25240.1); Has 393 Blast hits to 390 proteins in 24 species: Archae - 0; Bacteria - 0; Metazoa - 0; Fungi - 0; Plants - 391; Viruses - 0; Other Eukaryotes - 2 (source: NCBI BLink…	1.44402	1.79088	NS	0.693763	1.59054	1.46129	2.04031	2.08879	1.6331	2.31358
SUS4	AT3G43190	sucrose synthase 4 (SUS4); FUNCTIONS IN: UDP-glycosyltransferase activity, sucrose synthase activity, transferase activity, transferring glycosyl groups; INVOLVED IN: sucrose biosynthetic process, response to hypoxia; LOCATED IN: plasma membrane, vacuole, membrane; EXPRESSED IN: 15 plant structures; EXPRESSED DURING: 6 growth stages; CONTAINS InterPro DOMAIN/s: Sucrose synthase, plant/cyanobacter…	1.02331	NS	0.950768	NS	0.725769	1.72622	1.59982	NS	NS	NS
PSK4	AT3G49780	phytosulfokine 4 precursor (PSK4); FUNCTIONS IN: growth factor activity; INVOLVED IN: cell proliferation, cell differentiation, response to wounding, organ morphogenesis; LOCATED IN: extracellular matrix; EXPRESSED IN: 25 plant structures; EXPRESSED DURING: 10 growth stages; CONTAINS InterPro DOMAIN/s: Phytosulfokine (InterPro:IPR009438); BEST Arabidopsis thaliana protein match is: phytosulfokine…	0.631446	0.981872	0.96521	NS	0.799516	0.871665	1.50804	NS	NS	1.45572
AT4G32480	AT4G32480	Protein of unknown function (DUF506) ; FUNCTIONS IN: molecular_function unknown; INVOLVED IN: biological_process unknown; LOCATED IN: cellular_component unknown; EXPRESSED IN: cultured cell; CONTAINS InterPro DOMAIN/s: Protein of unknown function DUF506, plant (InterPro:IPR006502); BEST Arabidopsis thaliana protein match is: Protein of unknown function (DUF506) (TAIR:AT2G20670.1); Has 1807 Blast …	1.89349	2.20656	1.67828	1.91341	2.5272	1.42046	2.08046	1.78032	1.57838	2.47051
STY46	AT4G38470	ACT-like protein tyrosine kinase family protein; FUNCTIONS IN: protein serine/threonine/tyrosine kinase activity, protein kinase activity; INVOLVED IN: protein amino acid phosphorylation, metabolic process; LOCATED IN: cytosol; EXPRESSED IN: 25 plant structures; EXPRESSED DURING: 15 growth stages; CONTAINS InterPro DOMAIN/s: Serine/threonine-protein kinase domain (InterPro:IPR002290), Amino acid-…	0.566397	0.835118	0.883277	0.895212	0.980994	1.54665	1.87593	1.23171	1.50733	2.0059
AT5G19120	AT5G19120	Eukaryotic aspartyl protease family protein; FUNCTIONS IN: aspartic-type endopeptidase activity; INVOLVED IN: proteolysis; LOCATED IN: endomembrane system; EXPRESSED IN: 24 plant structures; EXPRESSED DURING: 13 growth stages; CONTAINS InterPro DOMAIN/s: Peptidase aspartic (InterPro:IPR021109), Peptidase aspartic, catalytic (InterPro:IPR009007), Peptidase A1 (InterPro:IPR001461); BEST Arabidopsis…	1.3096	1.59122	1.3405	1.27642	1.58332	2.18015	2.52526	2.09212	2.52451	2.88855
AT5G39890	AT5G39890	Protein of unknown function (DUF1637); FUNCTIONS IN: cysteamine dioxygenase activity; INVOLVED IN: oxidation reduction; LOCATED IN: cellular_component unknown; EXPRESSED IN: 24 plant structures; EXPRESSED DURING: 15 growth stages; CONTAINS InterPro DOMAIN/s: Protein of unknown function DUF1637 (InterPro:IPR012864); BEST Arabidopsis thaliana protein match is: Protein of unknown function (DUF1637) …	0.635638	NS	NS	NS	NS	3.69879	3.43404	2.15757	3.09986	2.65957
GDPD2	AT5G41080	PLC-like phosphodiesterases superfamily protein; FUNCTIONS IN: phosphoric diester hydrolase activity, glycerophosphodiester phosphodiesterase activity; INVOLVED IN: glycerol metabolic process, lipid metabolic process; EXPRESSED IN: 23 plant structures; EXPRESSED DURING: 14 growth stages; CONTAINS InterPro DOMAIN/s: PLC-like phosphodiesterase, TIM beta/alpha-barrel domain (InterPro:IPR017946), Gly…	0.892915	0.691382	NS	0.711912	0.991982	1.57603	2.14603	NS	NS	1.89162
HRPE Elements*
AT1G03220 **	AT1G03220	Eukaryotic aspartyl protease family protein	0.514611	0.60014	NS	NS	0.558749	1.13617	1.37009	0.707567	0.991562	1.09712
AT1G33055 **	AT1G33055	Uncharacterized protein	1.67206	2.63628	2.28419	1.86619	2.27715	4.38742	5.29068	3.77345	4.38742	4.91432
AT1G77120 **	ADH1	Alcohol dehydrogenase 1	0.532095	NS	NS	NS	NS	2.11262	1.52109	1.65078	NS	1.09798
AT2G26560 **	PLA2A	Phospholipase A 2A	1.82264	3.21519	NS	NS	1.72769	2.70837	2.95649	1.36051	2.57627	4.03346
AT3G02550 **	LBD41	LOB domain-containing protein 41	0.676088	NS	NS	NS	NS	2.51623	3.87131	2.88306	2.86377	3.4092
AT3G07350 **	F21O3.6		1.44402	1.79088	NS	0.693763	1.59054	1.46129	2.04031	2.08879	1.6331	2.31358
AT5G15120 **	AT5G15120	2-aminoethanethiol dioxygenase, putative (DUF1637)	0.568691	NS	NS	NS	NS	2.75753	2.8606	2.07398	2.65035	3.37257
AT5G20250 **	DIN10	Raffinose synthase family protein	1.03793	1.38701	NS	1.41241	1.26544	2.56603	2.64209	2.38971	2.81222	2.74494
AT5G25250 **	FLOT1	SPFH/Band 7/PHB domain-containing membrane-associated protein family	0.969803	NS	NS	NS	NS	0.787215	NS	NS	NS	2.09426
AT5G39890 **	AT5G39890	2-aminoethanethiol dioxygenase, putative (DUF1637)	0.635638	NS	NS	NS	NS	3.69879	3.43404	2.15757	3.09986	2.65957
*. Presence of HRPE elements as defined by Zubrycka et al. Nature Commun 14: 4665
**. Genes bound by HRE2 in ChIP (Zubrycka et al (2023) Nature Commun 14: 4665

## Sheet: Group III-h
GO- and Transcription Factor- Enrichment analyses of group-IIIh genes
Gene Annotation			Root					Shoot
Gene ID	Symbol	Description	Col	adc1	OXPtADC	cdr7/cuao3	OXCuAO3	Col	adc1	OXPtADC	cdr7/cuao3	OXCuAO3
AT1G01720	ATAF1	NAC (No Apical Meristem) domain transcriptional regulator superfamily protein [Source:NCBI gene (formerly Entrezgene);Acc:839265]	-0.411378	NS	NS	NS	NS	NS	NS	NS	NS	NS
AT1G07135	AT1G07135	glycine-rich protein [Source:NCBI gene (formerly Entrezgene);Acc:837224]	-1.81186	NS	NS	NS	NS	NS	NS	NS	NS	NS
AT1G07150	MAPKKK13	mitogen-activated protein kinase kinase kinase 13 [Source:NCBI gene (formerly Entrezgene);Acc:837226]	-0.867993	NS	NS	NS	NS	NS	NS	NS	NS	NS
AT1G09070	SRC2	soybean regulated by cold-2 [Source:NCBI gene (formerly Entrezgene);Acc:837428]	-0.916716	NS	NS	NS	NS	NS	NS	NS	NS	0.581027
AT1G18300	NUDT4	nudix hydrolase homolog 4 [Source:NCBI gene (formerly Entrezgene);Acc:838410]	-1.62969	NS	NS	NS	NS	NS	NS	NS	NS	NS
AT1G22220	AUF2	F-box family protein [Source:NCBI gene (formerly Entrezgene);Acc:838827]	-0.418107	NS	NS	NS	NS	NS	NS	NS	NS	NS
AT1G23710	AT1G23710		-0.604273	NS	NS	NS	NS	NS	NS	NS	NS	NS
AT1G50740	AT1G50740	Transmembrane proteins 14C [Source:NCBI gene (formerly Entrezgene);Acc:841496]	-1.06971	NS	NS	NS	NS	NS	NS	NS	NS	NS
AT1G53840	PME1	pectin methylesterase 1 [Source:NCBI gene (formerly Entrezgene);Acc:841821]	-0.498534	NS	NS	NS	NS	NS	NS	NS	NS	NS
AT1G68840	RAV2	related to ABI3/VP1 2 [Source:NCBI gene (formerly Entrezgene);Acc:843216]	-0.752919	NS	NS	-0.875153	NS	NS	1.29488	NS	0.736484	1.31852
AT1G76680	OPR1	12-oxophytodienoate reductase 1 [Source:NCBI gene (formerly Entrezgene);Acc:844001]	-0.408491	NS	NS	-0.569227	NS	NS	NS	NS	NS	NS
AT2G01150	RHA2B	RING-H2 finger protein 2B [Source:NCBI gene (formerly Entrezgene);Acc:814644]	-0.987027	NS	NS	NS	NS	NS	NS	NS	NS	NS
AT2G22500	UCP5	uncoupling protein 5 [Source:NCBI gene (formerly Entrezgene);Acc:816783]	-0.692409	NS	NS	NS	NS	NS	NS	NS	NS	0.39847
AT2G36220	AT2G36220		-1.04098	NS	NS	NS	-0.585502	NS	0.469952	NS	NS	0.791781
AT2G36580	AT2G36580	Pyruvate kinase family protein [Source:NCBI gene (formerly Entrezgene);Acc:818231]	-0.380413	-0.654796	-0.756851	NS	-0.743803	NS	NS	NS	NS	NS
AT2G40000	HSPRO2	ortholog of sugar beet HS1 PRO-1 2 [Source:NCBI gene (formerly Entrezgene);Acc:818588]	-0.906802	NS	NS	NS	NS	NS	0.77457	NS	NS	1.16558
AT2G40140	CZF1	zinc finger (CCCH-type) family protein [Source:NCBI gene (formerly Entrezgene);Acc:818605]	-0.769874	NS	NS	NS	NS	NS	NS	NS	NS	NS
AT2G41010	CAMBP25	calmodulin (CAM)-binding protein of 25 kDa [Source:NCBI gene (formerly Entrezgene);Acc:818701]	-0.801834	NS	NS	NS	NS	NS	NS	NS	NS	NS
AT2G41100	TCH3	Calcium-binding EF hand family protein [Source:NCBI gene (formerly Entrezgene);Acc:818709]	-0.885109	NS	NS	NS	0.966574	NS	1.37416	NS	NS	1.46527
AT3G15210	ERF4	ethylene responsive element binding factor 4 [Source:NCBI gene (formerly Entrezgene);Acc:820752]	-0.589249	NS	NS	NS	NS	NS	NS	NS	NS	NS
AT3G25250	AGC2-1	AGC (cAMP-dependent, cGMP-dependent and protein kinase C) kinase family protein [Source:NCBI gene (formerly Entrezgene);Acc:822119]	-0.86217	NS	NS	NS	NS	NS	NS	NS	NS	NS
AT3G28910	MYB30	myb domain protein 30 [Source:NCBI gene (formerly Entrezgene);Acc:822525]	-0.509911	NS	NS	NS	NS	NS	NS	NS	NS	NS
AT3G52430	PAD4	alpha/beta-Hydrolases superfamily protein [Source:NCBI gene (formerly Entrezgene);Acc:824408]	-0.554693	NS	NS	NS	NS	NS	NS	NS	NS	NS
AT3G52800	AT3G52800	A20/AN1-like zinc finger family protein [Source:NCBI gene (formerly Entrezgene);Acc:824446]	-0.763864	NS	NS	NS	NS	NS	0.705728	NS	NS	0.662341
AT3G55980	SZF1	salt-inducible zinc finger 1 [Source:NCBI gene (formerly Entrezgene);Acc:824764]	-1.24553	NS	NS	NS	NS	NS	NS	NS	NS	NS
AT3G56880	AT3G56880	VQ motif-containing protein [Source:NCBI gene (formerly Entrezgene);Acc:824855]	-0.800108	NS	NS	NS	NS	NS	NS	NS	NS	NS
AT4G12720	NUDT7	MutT/nudix family protein [Source:NCBI gene (formerly Entrezgene);Acc:826884]	-0.752344	NS	NS	NS	NS	NS	NS	NS	NS	NS
AT4G27280	AT4G27280	Calcium-binding EF-hand family protein [Source:NCBI gene (formerly Entrezgene);Acc:828836]	-1.32561	NS	NS	NS	-0.653862	NS	NS	NS	NS	NS
AT4G29780	AT4G29780	nuclease [Source:NCBI gene (formerly Entrezgene);Acc:829100]	-2.14798	NS	NS	NS	-0.842789	NS	NS	NS	NS	NS
AT4G30440	GAE1	UDP-D-glucuronate 4-epimerase 1 [Source:NCBI gene (formerly Entrezgene);Acc:829167]	-0.572339	NS	NS	NS	NS	NS	NS	NS	NS	NS
AT5G13190	GILP	GSH-induced LITAF domain protein [Source:NCBI gene (formerly Entrezgene);Acc:831158]	-0.687911	NS	NS	NS	NS	NS	NS	NS	NS	0.392402
AT5G24590	TIP	TCV-interacting protein [Source:NCBI gene (formerly Entrezgene);Acc:832530]	-0.651395	NS	NS	NS	NS	NS	NS	NS	NS	0.449922
AT5G42050	AT5G42050	DCD (Development and Cell Death) domain protein [Source:NCBI gene (formerly Entrezgene);Acc:834210]	-0.555228	NS	NS	NS	NS	NS	NS	NS	NS	NS
AT5G57560	TCH4	Xyloglucan endotransglucosylase/hydrolase family protein [Source:NCBI gene (formerly Entrezgene);Acc:835860]	-2.4445	NS	NS	NS	-0.729278	NS	0.761636	NS	NS	0.931645
AT5G66650	AT5G66650	calcium uniporter (DUF607) [Source:NCBI gene (formerly Entrezgene);Acc:836797]	-0.7945	NS	NS	NS	NS	NS	0.704774	NS	NS	NS
GO enrichment analysis
GO-BP
Enrichment FDR	nGenes	Biological Process (BP)	Pathway Genes	Fold Enrichment
6.8762e-65	33	cellular response to hypoxia	240	108.539
6.8762e-65	33	cellular response to decreased oxygen levels	242	107.642
1.07834e-69	35	response to hypoxia	267	103.476
1.07834e-69	35	response to decreased oxygen levels	271	101.948
0.000122171	4	plant-type hypersensitive response	87	36.2929
0.000122171	4	programmed cell death induced by symbiont	88	35.8805
8.42938e-05	5	programmed cell death	168	23.4932
1.1842e-05	6	cell death	216	21.927
7.94052e-46	35	cellular response to stress	1272	21.7201
0.000122171	5	reg. of response to biotic stimulus	192	20.5565
6.53627e-38	34	cellular response to chemical stimulus	1791	14.9853
9.88644e-38	35	response to abiotic stimulus	2170	12.7318
0.000106646	7	response to bacterium	509	10.8558
2.30389e-32	35	response to chemical	3091	8.93821
1.09801e-28	35	response to stress	3953	6.98912
0.000122171	11	defense response	1704	5.09571
GO-MF
Enrichment FDR	nGenes	Molecular Function (MF)	Pathway Genes	Fold Enrichment
0.0351248	1	thiosulfate transmembrane transporter activity	3	263.124
0.0351248	1	12-oxophytodienoate reductase activity	3	263.124
0.0351248	1	oxidative phosphorylation uncoupler activity	3	263.124
0.00435702	2	NAD+ diphosphatase activity	8	197.343
0.0351248	1	succinate transmembrane transporter activity	4	197.343
0.00435702	2	ADP-ribose diphosphatase activity	10	157.874
0.0394669	1	oxaloacetate transmembrane transporter activity	5	157.874
0.0394669	1	fatty acid transmembrane transporter activity	6	131.562
0.013437	2	nucleotide diphosphatase activity	21	75.1782
0.0351248	2	organic acid transmembrane transporter activity	82	19.253
0.0351248	2	carboxylic acid transmembrane transporter activity	82	19.253
0.0286194	6	transcription cis-regulatory region binding	979	4.83782
0.0286194	6	transcription regulatory region nucleic acid binding	979	4.83782
0.0286194	6	sequence-specific double-stranded DNA binding	998	4.74572
0.0347392	6	double-stranded DNA binding	1112	4.2592
0.0351248	6	sequence-specific DNA binding	1270	3.72931
0.0351248	7	DNA-binding transcription factor activity	1660	3.32867
0.0351248	9	DNA binding	2528	2.81026
0.0286194	12	metal ion binding	3803	2.49079
0.0286194	12	cation binding	3824	2.47711
GO-CC
Enrichment FDR	nGenes	Cellular Component (CC)	Pathway Genes	Fold Enrichment
NS
Transcription factor enrichment analysis
TF-AGRIS
Enrichment FDR	nGenes	Transcription Factor Binding Site	Pathway Genes	Fold Enrichment
7.70991e-16	13	HY5 target	264	38.8706
4.38855e-06	9	CAMTA5 target	673	10.5562
1.65608e-11	20	CAMTA1 target	2295	6.87905
0.00262171	6	ATBHLH15 target	749	6.3234
0.00013633	10	AT1G44830 target	1401	5.63434
0.000623964	9	LBD23 target	1361	5.21994
5.68855e-10	23	SEPALLATA3 target	4100	4.42818
0.0017173	9	BZIP16 target	1631	4.35582
8.09066e-05	14	AT2G15740 target	2781	3.97382
0.00109113	11	SPL14 target	2263	3.83698
0.00185449	10	AT5G18450 target	2095	3.76788
2.45592e-05	18	ESE3 target	4281	3.31901
0.000509049	16	AT5G22990 target	4337	2.91214
0.0017173	14	AREB3 target	3936	2.80772
0.00211975	14	CBF3 target	4064	2.71929
0.0017173	15	ERF38 target	4367	2.71137
0.0017173	15	WRKY33 target	4472	2.64771
0.00262171	14	ABI5 target	4189	2.63815
0.0017173	16	ANAC042 target	4985	2.53359
0.00263286	15	ERF4 target	4762	2.48647
			Root					Shoot
TF target	Gene ID	Annotation	Col	adc1	OXPtADC	cdr7/cuao3	OXCuAO3	Col	adc1	OXPtADC	cdr7/cuao3	OXCuAO3
HY5 target
AT1G07135	AT1G07135	glycine-rich protein; Has 22251 Blast hits to 8348 proteins in 789 species: Archae - 21; Bacteria - 7328; Metazoa - 6126; Fungi - 1280; Plants - 3980; Viruses - 524; Other Eukaryotes - 2992 (source: NCBI BLink).	-1.81186	NS	NS	NS	NS	NS	NS	NS	NS	NS
SRC2	AT1G09070	soybean gene regulated by cold-2 (SRC2); CONTAINS InterPro DOMAIN/s: C2 calcium/lipid-binding domain, CaLB (InterPro:IPR008973), C2 calcium-dependent membrane targeting (InterPro:IPR000008); BEST Arabidopsis thaliana protein match is: Calcium-dependent lipid-binding (CaLB domain) family protein (TAIR:AT3G16510.1); Has 25146 Blast hits to 15856 proteins in 1076 species: Archae - 6; Bacteria - 3010…	-0.916716	NS	NS	NS	NS	NS	NS	NS	NS	0.581027
AT3G56880	AT3G56880	VQ motif-containing protein; CONTAINS InterPro DOMAIN/s: VQ (InterPro:IPR008889); BEST Arabidopsis thaliana protein match is: calmodulin (CAM)-binding protein of 25 kDa (TAIR:AT2G41010.1); Has 109 Blast hits to 109 proteins in 12 species: Archae - 0; Bacteria - 0; Metazoa - 0; Fungi - 3; Plants - 106; Viruses - 0; Other Eukaryotes - 0 (source: NCBI BLink).	-0.800108	NS	NS	NS	NS	NS	NS	NS	NS	NS
TCH3	AT2G41100	TOUCH 3 (TCH3); FUNCTIONS IN: calcium ion binding; INVOLVED IN: response to mechanical stimulus, response to temperature stimulus, thigmotropism, response to absence of light; LOCATED IN: plasma membrane; EXPRESSED IN: 26 plant structures; EXPRESSED DURING: 14 growth stages; CONTAINS InterPro DOMAIN/s: EF-Hand 1, calcium-binding site (InterPro:IPR018247), EF-HAND 2 (InterPro:IPR018249), Calcium-b…	-0.885109	NS	NS	NS	0.966574	NS	1.37416	NS	NS	1.46527
AT5G66650	AT5G66650	Protein of unknown function (DUF607); CONTAINS InterPro DOMAIN/s: Protein of unknown function DUF607 (InterPro:IPR006769); BEST Arabidopsis thaliana protein match is: Protein of unknown function (DUF607) (TAIR:AT2G23790.1); Has 1807 Blast hits to 1807 proteins in 277 species: Archae - 0; Bacteria - 0; Metazoa - 736; Fungi - 347; Plants - 385; Viruses - 0; Other Eukaryotes - 339 (source: NCBI BLin…	-0.7945	NS	NS	NS	NS	NS	0.704774	NS	NS	NS
AT2G36220	AT2G36220	unknown protein; BEST Arabidopsis thaliana protein match is: unknown protein (TAIR:AT3G52710.1); Has 74 Blast hits to 74 proteins in 10 species: Archae - 0; Bacteria - 0; Metazoa - 0; Fungi - 0; Plants - 74; Viruses - 0; Other Eukaryotes - 0 (source: NCBI BLink).	-1.04098	NS	NS	NS	-0.585502	NS	0.469952	NS	NS	0.791781
UCP5	AT2G22500	uncoupling protein 5 (UCP5); FUNCTIONS IN: binding, dicarboxylic acid transmembrane transporter activity; INVOLVED IN: transport, mitochondrial transport; LOCATED IN: mitochondrion, mitochondrial inner membrane, membrane; EXPRESSED IN: 23 plant structures; EXPRESSED DURING: 15 growth stages; CONTAINS InterPro DOMAIN/s: Mitochondrial substrate carrier (InterPro:IPR001993), Mitochondrial brown fat …	-0.692409	NS	NS	NS	NS	NS	NS	NS	NS	0.39847
AT4G27280	AT4G27280	Calcium-binding EF-hand family protein; FUNCTIONS IN: calcium ion binding; INVOLVED IN: response to karrikin; EXPRESSED IN: 23 plant structures; EXPRESSED DURING: 13 growth stages; CONTAINS InterPro DOMAIN/s: EF-Hand 1, calcium-binding site (InterPro:IPR018247), EF-HAND 2 (InterPro:IPR018249), EF-hand-like domain (InterPro:IPR011992); BEST Arabidopsis thaliana protein match is: pinoid-binding pro…	-1.32561	NS	NS	NS	-0.653862	NS	NS	NS	NS	NS
AT4G29780	AT4G29780	unknown protein; BEST Arabidopsis thaliana protein match is: unknown protein (TAIR:AT5G12010.1); Has 945 Blast hits to 944 proteins in 87 species: Archae - 0; Bacteria - 0; Metazoa - 519; Fungi - 43; Plants - 365; Viruses - 0; Other Eukaryotes - 18 (source: NCBI BLink).	-2.14798	NS	NS	NS	-0.842789	NS	NS	NS	NS	NS
AGC2-1	AT3G25250	AGC2-1; FUNCTIONS IN: kinase activity; INVOLVED IN: protein amino acid phosphorylation; LOCATED IN: cellular_component unknown; EXPRESSED IN: hypocotyl, root, stamen, pollen tube; EXPRESSED DURING: 4 anthesis, petal differentiation and expansion stage; CONTAINS InterPro DOMAIN/s: Protein kinase, catalytic domain (InterPro:IPR000719), Serine/threonine-protein kinase domain (InterPro:IPR002290), Se…	-0.86217	NS	NS	NS	NS	NS	NS	NS	NS	NS
SZF1	AT3G55980	salt-inducible zinc finger 1 (SZF1); CONTAINS InterPro DOMAIN/s: Zinc finger, CCCH-type (InterPro:IPR000571), Ankyrin repeat-containing domain (InterPro:IPR020683), Ankyrin repeat (InterPro:IPR002110); BEST Arabidopsis thaliana protein match is: zinc finger (CCCH-type) family protein (TAIR:AT2G40140.2); Has 1623 Blast hits to 1414 proteins in 181 species: Archae - 2; Bacteria - 49; Metazoa - 777;…	-1.24553	NS	NS	NS	NS	NS	NS	NS	NS	NS
RAV2	AT1G68840	related to ABI3/VP1 2 (RAV2); FUNCTIONS IN: transcription repressor activity, DNA binding, sequence-specific DNA binding transcription factor activity; INVOLVED IN: regulation of transcription, DNA-dependent; LOCATED IN: chloroplast; EXPRESSED IN: 12 plant structures; EXPRESSED DURING: 8 growth stages; CONTAINS InterPro DOMAIN/s: DNA-binding, integrase-type (InterPro:IPR016177), Transcriptional f…	-0.752919	NS	NS	-0.875153	NS	NS	1.29488	NS	0.736484	1.31852
NUDT4	AT1G18300	nudix hydrolase homolog 4 (NUDT4); FUNCTIONS IN: hydrolase activity; LOCATED IN: cytosol; EXPRESSED IN: stem, root, leaf; CONTAINS InterPro DOMAIN/s: NUDIX hydrolase domain-like (InterPro:IPR015797), NUDIX hydrolase, conserved site (InterPro:IPR020084), NUDIX hydrolase domain (InterPro:IPR000086); BEST Arabidopsis thaliana protein match is: nudix hydrolase homolog 21 (TAIR:AT1G73540.1); Has 1264 …	-1.62969	NS	NS	NS	NS	NS	NS	NS	NS	NS
CAMTA5 target
ATAF1	AT1G01720	ATAF1; CONTAINS InterPro DOMAIN/s: No apical meristem (NAM) protein (InterPro:IPR003441); BEST Arabidopsis thaliana protein match is: NAC domain containing protein 32 (TAIR:AT1G77450.1); Has 3043 Blast hits to 3037 proteins in 75 species: Archae - 0; Bacteria - 0; Metazoa - 0; Fungi - 0; Plants - 3043; Viruses - 0; Other Eukaryotes - 0 (source: NCBI BLink).	-0.411378	NS	NS	NS	NS	NS	NS	NS	NS	NS
SRC2	AT1G09070	soybean gene regulated by cold-2 (SRC2); CONTAINS InterPro DOMAIN/s: C2 calcium/lipid-binding domain, CaLB (InterPro:IPR008973), C2 calcium-dependent membrane targeting (InterPro:IPR000008); BEST Arabidopsis thaliana protein match is: Calcium-dependent lipid-binding (CaLB domain) family protein (TAIR:AT3G16510.1); Has 25146 Blast hits to 15856 proteins in 1076 species: Archae - 6; Bacteria - 3010…	-0.916716	NS	NS	NS	NS	NS	NS	NS	NS	0.581027
NUDT4	AT1G18300	nudix hydrolase homolog 4 (NUDT4); FUNCTIONS IN: hydrolase activity; LOCATED IN: cytosol; EXPRESSED IN: stem, root, leaf; CONTAINS InterPro DOMAIN/s: NUDIX hydrolase domain-like (InterPro:IPR015797), NUDIX hydrolase, conserved site (InterPro:IPR020084), NUDIX hydrolase domain (InterPro:IPR000086); BEST Arabidopsis thaliana protein match is: nudix hydrolase homolog 21 (TAIR:AT1G73540.1); Has 1264 …	-1.62969	NS	NS	NS	NS	NS	NS	NS	NS	NS
AUF2	AT1G22220	F-box family protein; CONTAINS InterPro DOMAIN/s: F-box domain, cyclin-like (InterPro:IPR001810); BEST Arabidopsis thaliana protein match is: F-box family protein (TAIR:AT1G78100.1); Has 155 Blast hits to 154 proteins in 12 species: Archae - 0; Bacteria - 0; Metazoa - 0; Fungi - 0; Plants - 155; Viruses - 0; Other Eukaryotes - 0 (source: NCBI BLink).	-0.418107	NS	NS	NS	NS	NS	NS	NS	NS	NS
AT2G36220	AT2G36220	unknown protein; BEST Arabidopsis thaliana protein match is: unknown protein (TAIR:AT3G52710.1); Has 74 Blast hits to 74 proteins in 10 species: Archae - 0; Bacteria - 0; Metazoa - 0; Fungi - 0; Plants - 74; Viruses - 0; Other Eukaryotes - 0 (source: NCBI BLink).	-1.04098	NS	NS	NS	-0.585502	NS	0.469952	NS	NS	0.791781
ERF4	AT3G15210	ethylene responsive element binding factor 4 (ERF4); CONTAINS InterPro DOMAIN/s: DNA-binding, integrase-type (InterPro:IPR016177), Pathogenesis-related transcriptional factor/ERF, DNA-binding (InterPro:IPR001471); BEST Arabidopsis thaliana protein match is: ethylene response factor 8 (TAIR:AT1G53170.1); Has 6170 Blast hits to 5786 proteins in 253 species: Archae - 0; Bacteria - 0; Metazoa - 0; Fu…	-0.589249	NS	NS	NS	NS	NS	NS	NS	NS	NS
SZF1	AT3G55980	salt-inducible zinc finger 1 (SZF1); CONTAINS InterPro DOMAIN/s: Zinc finger, CCCH-type (InterPro:IPR000571), Ankyrin repeat-containing domain (InterPro:IPR020683), Ankyrin repeat (InterPro:IPR002110); BEST Arabidopsis thaliana protein match is: zinc finger (CCCH-type) family protein (TAIR:AT2G40140.2); Has 1623 Blast hits to 1414 proteins in 181 species: Archae - 2; Bacteria - 49; Metazoa - 777;…	-1.24553	NS	NS	NS	NS	NS	NS	NS	NS	NS
AT4G29780	AT4G29780	unknown protein; BEST Arabidopsis thaliana protein match is: unknown protein (TAIR:AT5G12010.1); Has 945 Blast hits to 944 proteins in 87 species: Archae - 0; Bacteria - 0; Metazoa - 519; Fungi - 43; Plants - 365; Viruses - 0; Other Eukaryotes - 18 (source: NCBI BLink).	-2.14798	NS	NS	NS	-0.842789	NS	NS	NS	NS	NS
TIP	AT5G24590	TCV-interacting protein (TIP); CONTAINS InterPro DOMAIN/s: No apical meristem (NAM) protein (InterPro:IPR003441); BEST Arabidopsis thaliana protein match is: NAC domain containing protein 62 (TAIR:AT3G49530.1); Has 2952 Blast hits to 2945 proteins in 75 species: Archae - 0; Bacteria - 0; Metazoa - 0; Fungi - 0; Plants - 2952; Viruses - 0; Other Eukaryotes - 0 (source: NCBI BLink).	-0.651395	NS	NS	NS	NS	NS	NS	NS	NS	0.449922
CAMTA1 target
AT1G07135	AT1G07135	glycine-rich protein; Has 22251 Blast hits to 8348 proteins in 789 species: Archae - 21; Bacteria - 7328; Metazoa - 6126; Fungi - 1280; Plants - 3980; Viruses - 524; Other Eukaryotes - 2992 (source: NCBI BLink).	-1.81186	NS	NS	NS	NS	NS	NS	NS	NS	NS
MAPKKK13	AT1G07150	mitogen-activated protein kinase kinase kinase 13 (MAPKKK13); FUNCTIONS IN: protein serine/threonine kinase activity, protein kinase activity, kinase activity, ATP binding; INVOLVED IN: protein amino acid phosphorylation; EXPRESSED IN: 8 plant structures; EXPRESSED DURING: LP.04 four leaves visible, 4 anthesis, LP.10 ten leaves visible, petal differentiation and expansion stage; CONTAINS InterPro…	-0.867993	NS	NS	NS	NS	NS	NS	NS	NS	NS
SRC2	AT1G09070	soybean gene regulated by cold-2 (SRC2); CONTAINS InterPro DOMAIN/s: C2 calcium/lipid-binding domain, CaLB (InterPro:IPR008973), C2 calcium-dependent membrane targeting (InterPro:IPR000008); BEST Arabidopsis thaliana protein match is: Calcium-dependent lipid-binding (CaLB domain) family protein (TAIR:AT3G16510.1); Has 25146 Blast hits to 15856 proteins in 1076 species: Archae - 6; Bacteria - 3010…	-0.916716	NS	NS	NS	NS	NS	NS	NS	NS	0.581027
NUDT4	AT1G18300	nudix hydrolase homolog 4 (NUDT4); FUNCTIONS IN: hydrolase activity; LOCATED IN: cytosol; EXPRESSED IN: stem, root, leaf; CONTAINS InterPro DOMAIN/s: NUDIX hydrolase domain-like (InterPro:IPR015797), NUDIX hydrolase, conserved site (InterPro:IPR020084), NUDIX hydrolase domain (InterPro:IPR000086); BEST Arabidopsis thaliana protein match is: nudix hydrolase homolog 21 (TAIR:AT1G73540.1); Has 1264 …	-1.62969	NS	NS	NS	NS	NS	NS	NS	NS	NS
AUF2	AT1G22220	F-box family protein; CONTAINS InterPro DOMAIN/s: F-box domain, cyclin-like (InterPro:IPR001810); BEST Arabidopsis thaliana protein match is: F-box family protein (TAIR:AT1G78100.1); Has 155 Blast hits to 154 proteins in 12 species: Archae - 0; Bacteria - 0; Metazoa - 0; Fungi - 0; Plants - 155; Viruses - 0; Other Eukaryotes - 0 (source: NCBI BLink).	-0.418107	NS	NS	NS	NS	NS	NS	NS	NS	NS
AT1G23710	AT1G23710	Protein of unknown function (DUF1645); CONTAINS InterPro DOMAIN/s: Protein of unknown function DUF1645 (InterPro:IPR012442); BEST Arabidopsis thaliana protein match is: Protein of unknown function (DUF1645) (TAIR:AT1G70420.1); Has 288 Blast hits to 282 proteins in 52 species: Archae - 0; Bacteria - 6; Metazoa - 16; Fungi - 11; Plants - 191; Viruses - 0; Other Eukaryotes - 64 (source: NCBI BLink).	-0.604273	NS	NS	NS	NS	NS	NS	NS	NS	NS
RAV2	AT1G68840	related to ABI3/VP1 2 (RAV2); FUNCTIONS IN: transcription repressor activity, DNA binding, sequence-specific DNA binding transcription factor activity; INVOLVED IN: regulation of transcription, DNA-dependent; LOCATED IN: chloroplast; EXPRESSED IN: 12 plant structures; EXPRESSED DURING: 8 growth stages; CONTAINS InterPro DOMAIN/s: DNA-binding, integrase-type (InterPro:IPR016177), Transcriptional f…	-0.752919	NS	NS	-0.875153	NS	NS	1.29488	NS	0.736484	1.31852
AT2G36220	AT2G36220	unknown protein; BEST Arabidopsis thaliana protein match is: unknown protein (TAIR:AT3G52710.1); Has 74 Blast hits to 74 proteins in 10 species: Archae - 0; Bacteria - 0; Metazoa - 0; Fungi - 0; Plants - 74; Viruses - 0; Other Eukaryotes - 0 (source: NCBI BLink).	-1.04098	NS	NS	NS	-0.585502	NS	0.469952	NS	NS	0.791781
HSPRO2	AT2G40000	ortholog of sugar beet HS1 PRO-1 2 (HSPRO2); CONTAINS InterPro DOMAIN/s: Hs1pro-1, C-terminal (InterPro:IPR009743), Hs1pro-1, N-terminal (InterPro:IPR009869); BEST Arabidopsis thaliana protein match is: Hs1pro-1 protein (TAIR:AT3G55840.1); Has 71 Blast hits to 71 proteins in 18 species: Archae - 0; Bacteria - 0; Metazoa - 0; Fungi - 0; Plants - 60; Viruses - 0; Other Eukaryotes - 11 (source: NCBI…	-0.906802	NS	NS	NS	NS	NS	0.77457	NS	NS	1.16558
CZF1	AT2G40140	CZF1; CONTAINS InterPro DOMAIN/s: Zinc finger, CCCH-type (InterPro:IPR000571), Ankyrin repeat-containing domain (InterPro:IPR020683), Ankyrin repeat (InterPro:IPR002110); BEST Arabidopsis thaliana protein match is: salt-inducible zinc finger 1 (TAIR:AT3G55980.1); Has 1196 Blast hits to 1143 proteins in 183 species: Archae - 4; Bacteria - 47; Metazoa - 401; Fungi - 61; Plants - 441; Viruses - 2; O…	-0.769874	NS	NS	NS	NS	NS	NS	NS	NS	NS
CAMBP25	AT2G41010	calmodulin (CAM)-binding protein of 25 kDa (CAMBP25); CONTAINS InterPro DOMAIN/s: VQ (InterPro:IPR008889); BEST Arabidopsis thaliana protein match is: VQ motif-containing protein (TAIR:AT3G56880.1); Has 142 Blast hits to 142 proteins in 12 species: Archae - 0; Bacteria - 0; Metazoa - 0; Fungi - 0; Plants - 142; Viruses - 0; Other Eukaryotes - 0 (source: NCBI BLink).	-0.801834	NS	NS	NS	NS	NS	NS	NS	NS	NS
ERF4	AT3G15210	ethylene responsive element binding factor 4 (ERF4); CONTAINS InterPro DOMAIN/s: DNA-binding, integrase-type (InterPro:IPR016177), Pathogenesis-related transcriptional factor/ERF, DNA-binding (InterPro:IPR001471); BEST Arabidopsis thaliana protein match is: ethylene response factor 8 (TAIR:AT1G53170.1); Has 6170 Blast hits to 5786 proteins in 253 species: Archae - 0; Bacteria - 0; Metazoa - 0; Fu…	-0.589249	NS	NS	NS	NS	NS	NS	NS	NS	NS
MYB30	AT3G28910	myb domain protein 30 (MYB30); CONTAINS InterPro DOMAIN/s: SANT, DNA-binding (InterPro:IPR001005), Homeodomain-like (InterPro:IPR009057), Myb, DNA-binding (InterPro:IPR014778), HTH transcriptional regulator, Myb-type, DNA-binding (InterPro:IPR017930), Homeodomain-related (InterPro:IPR012287), Myb transcription factor (InterPro:IPR015495); BEST Arabidopsis thaliana protein match is: myb domain pro…	-0.509911	NS	NS	NS	NS	NS	NS	NS	NS	NS
AT3G52800	AT3G52800	A20/AN1-like zinc finger family protein; FUNCTIONS IN: DNA binding, zinc ion binding; INVOLVED IN: response to chitin; LOCATED IN: cellular_component unknown; EXPRESSED IN: 23 plant structures; EXPRESSED DURING: 15 growth stages; CONTAINS InterPro DOMAIN/s: Zinc finger, AN1-type (InterPro:IPR000058), Zinc finger, A20-type (InterPro:IPR002653); BEST Arabidopsis thaliana protein match is: A20/AN1-l…	-0.763864	NS	NS	NS	NS	NS	0.705728	NS	NS	0.662341
SZF1	AT3G55980	salt-inducible zinc finger 1 (SZF1); CONTAINS InterPro DOMAIN/s: Zinc finger, CCCH-type (InterPro:IPR000571), Ankyrin repeat-containing domain (InterPro:IPR020683), Ankyrin repeat (InterPro:IPR002110); BEST Arabidopsis thaliana protein match is: zinc finger (CCCH-type) family protein (TAIR:AT2G40140.2); Has 1623 Blast hits to 1414 proteins in 181 species: Archae - 2; Bacteria - 49; Metazoa - 777;…	-1.24553	NS	NS	NS	NS	NS	NS	NS	NS	NS
AT3G56880	AT3G56880	VQ motif-containing protein; CONTAINS InterPro DOMAIN/s: VQ (InterPro:IPR008889); BEST Arabidopsis thaliana protein match is: calmodulin (CAM)-binding protein of 25 kDa (TAIR:AT2G41010.1); Has 109 Blast hits to 109 proteins in 12 species: Archae - 0; Bacteria - 0; Metazoa - 0; Fungi - 3; Plants - 106; Viruses - 0; Other Eukaryotes - 0 (source: NCBI BLink).	-0.800108	NS	NS	NS	NS	NS	NS	NS	NS	NS
AT4G29780	AT4G29780	unknown protein; BEST Arabidopsis thaliana protein match is: unknown protein (TAIR:AT5G12010.1); Has 945 Blast hits to 944 proteins in 87 species: Archae - 0; Bacteria - 0; Metazoa - 519; Fungi - 43; Plants - 365; Viruses - 0; Other Eukaryotes - 18 (source: NCBI BLink).	-2.14798	NS	NS	NS	-0.842789	NS	NS	NS	NS	NS
GILP	AT5G13190	CONTAINS InterPro DOMAIN/s: LPS-induced tumor necrosis factor alpha factor (InterPro:IPR006629); Has 30201 Blast hits to 17322 proteins in 780 species: Archae - 12; Bacteria - 1396; Metazoa - 17338; Fungi - 3422; Plants - 5037; Viruses - 0; Other Eukaryotes - 2996 (source: NCBI BLink).	-0.687911	NS	NS	NS	NS	NS	NS	NS	NS	0.392402
TIP	AT5G24590	TCV-interacting protein (TIP); CONTAINS InterPro DOMAIN/s: No apical meristem (NAM) protein (InterPro:IPR003441); BEST Arabidopsis thaliana protein match is: NAC domain containing protein 62 (TAIR:AT3G49530.1); Has 2952 Blast hits to 2945 proteins in 75 species: Archae - 0; Bacteria - 0; Metazoa - 0; Fungi - 0; Plants - 2952; Viruses - 0; Other Eukaryotes - 0 (source: NCBI BLink).	-0.651395	NS	NS	NS	NS	NS	NS	NS	NS	0.449922
TCH4	AT5G57560	Touch 4 (TCH4); CONTAINS InterPro DOMAIN/s: Xyloglucan endotransglucosylase/hydrolase (InterPro:IPR016455), Xyloglucan endo-transglycosylase, C-terminal (InterPro:IPR010713), Concanavalin A-like lectin/glucanase, subgroup (InterPro:IPR013320), Concanavalin A-like lectin/glucanase (InterPro:IPR008985), Glycoside hydrolase, family 16 (InterPro:IPR000757), Glycoside hydrolase, family 16, active site…	-2.4445	NS	NS	NS	-0.729278	NS	0.761636	NS	NS	0.931645
ATBHLH15 target
ATAF1	AT1G01720	ATAF1; CONTAINS InterPro DOMAIN/s: No apical meristem (NAM) protein (InterPro:IPR003441); BEST Arabidopsis thaliana protein match is: NAC domain containing protein 32 (TAIR:AT1G77450.1); Has 3043 Blast hits to 3037 proteins in 75 species: Archae - 0; Bacteria - 0; Metazoa - 0; Fungi - 0; Plants - 3043; Viruses - 0; Other Eukaryotes - 0 (source: NCBI BLink).	-0.411378	NS	NS	NS	NS	NS	NS	NS	NS	NS
MAPKKK13	AT1G07150	mitogen-activated protein kinase kinase kinase 13 (MAPKKK13); FUNCTIONS IN: protein serine/threonine kinase activity, protein kinase activity, kinase activity, ATP binding; INVOLVED IN: protein amino acid phosphorylation; EXPRESSED IN: 8 plant structures; EXPRESSED DURING: LP.04 four leaves visible, 4 anthesis, LP.10 ten leaves visible, petal differentiation and expansion stage; CONTAINS InterPro…	-0.867993	NS	NS	NS	NS	NS	NS	NS	NS	NS
AT1G23710	AT1G23710	Protein of unknown function (DUF1645); CONTAINS InterPro DOMAIN/s: Protein of unknown function DUF1645 (InterPro:IPR012442); BEST Arabidopsis thaliana protein match is: Protein of unknown function (DUF1645) (TAIR:AT1G70420.1); Has 288 Blast hits to 282 proteins in 52 species: Archae - 0; Bacteria - 6; Metazoa - 16; Fungi - 11; Plants - 191; Viruses - 0; Other Eukaryotes - 64 (source: NCBI BLink).	-0.604273	NS	NS	NS	NS	NS	NS	NS	NS	NS
RHA2B	AT2G01150	RING-H2 finger protein 2B (RHA2B); CONTAINS InterPro DOMAIN/s: Zinc finger, RING-type (InterPro:IPR001841), Zinc finger, C3HC4 RING-type (InterPro:IPR018957); BEST Arabidopsis thaliana protein match is: RING-H2 finger A2A (TAIR:AT1G15100.1); Has 8536 Blast hits to 8514 proteins in 269 species: Archae - 0; Bacteria - 0; Metazoa - 2151; Fungi - 713; Plants - 4534; Viruses - 16; Other Eukaryotes - 1…	-0.987027	NS	NS	NS	NS	NS	NS	NS	NS	NS
ERF4	AT3G15210	ethylene responsive element binding factor 4 (ERF4); CONTAINS InterPro DOMAIN/s: DNA-binding, integrase-type (InterPro:IPR016177), Pathogenesis-related transcriptional factor/ERF, DNA-binding (InterPro:IPR001471); BEST Arabidopsis thaliana protein match is: ethylene response factor 8 (TAIR:AT1G53170.1); Has 6170 Blast hits to 5786 proteins in 253 species: Archae - 0; Bacteria - 0; Metazoa - 0; Fu…	-0.589249	NS	NS	NS	NS	NS	NS	NS	NS	NS
SZF1	AT3G55980	salt-inducible zinc finger 1 (SZF1); CONTAINS InterPro DOMAIN/s: Zinc finger, CCCH-type (InterPro:IPR000571), Ankyrin repeat-containing domain (InterPro:IPR020683), Ankyrin repeat (InterPro:IPR002110); BEST Arabidopsis thaliana protein match is: zinc finger (CCCH-type) family protein (TAIR:AT2G40140.2); Has 1623 Blast hits to 1414 proteins in 181 species: Archae - 2; Bacteria - 49; Metazoa - 777;…	-1.24553	NS	NS	NS	NS	NS	NS	NS	NS	NS
AT1G44830 target
AT1G07135	AT1G07135	glycine-rich protein; Has 22251 Blast hits to 8348 proteins in 789 species: Archae - 21; Bacteria - 7328; Metazoa - 6126; Fungi - 1280; Plants - 3980; Viruses - 524; Other Eukaryotes - 2992 (source: NCBI BLink).	-1.81186	NS	NS	NS	NS	NS	NS	NS	NS	NS
SRC2	AT1G09070	soybean gene regulated by cold-2 (SRC2); CONTAINS InterPro DOMAIN/s: C2 calcium/lipid-binding domain, CaLB (InterPro:IPR008973), C2 calcium-dependent membrane targeting (InterPro:IPR000008); BEST Arabidopsis thaliana protein match is: Calcium-dependent lipid-binding (CaLB domain) family protein (TAIR:AT3G16510.1); Has 25146 Blast hits to 15856 proteins in 1076 species: Archae - 6; Bacteria - 3010…	-0.916716	NS	NS	NS	NS	NS	NS	NS	NS	0.581027
AUF2	AT1G22220	F-box family protein; CONTAINS InterPro DOMAIN/s: F-box domain, cyclin-like (InterPro:IPR001810); BEST Arabidopsis thaliana protein match is: F-box family protein (TAIR:AT1G78100.1); Has 155 Blast hits to 154 proteins in 12 species: Archae - 0; Bacteria - 0; Metazoa - 0; Fungi - 0; Plants - 155; Viruses - 0; Other Eukaryotes - 0 (source: NCBI BLink).	-0.418107	NS	NS	NS	NS	NS	NS	NS	NS	NS
OPR1	AT1G76680	12-oxophytodienoate reductase 1 (OPR1); FUNCTIONS IN: 12-oxophytodienoate reductase activity; INVOLVED IN: in 7 processes; LOCATED IN: cellular_component unknown; EXPRESSED IN: 11 plant structures; EXPRESSED DURING: seedling growth, developing seed stage; CONTAINS InterPro DOMAIN/s: NADH:flavin oxidoreductase/NADH oxidase, N-terminal (InterPro:IPR001155), Aldolase-type TIM barrel (InterPro:IPR013…	-0.408491	NS	NS	-0.569227	NS	NS	NS	NS	NS	NS
AGC2-1	AT3G25250	AGC2-1; FUNCTIONS IN: kinase activity; INVOLVED IN: protein amino acid phosphorylation; LOCATED IN: cellular_component unknown; EXPRESSED IN: hypocotyl, root, stamen, pollen tube; EXPRESSED DURING: 4 anthesis, petal differentiation and expansion stage; CONTAINS InterPro DOMAIN/s: Protein kinase, catalytic domain (InterPro:IPR000719), Serine/threonine-protein kinase domain (InterPro:IPR002290), Se…	-0.86217	NS	NS	NS	NS	NS	NS	NS	NS	NS
PAD4	AT3G52430	PHYTOALEXIN DEFICIENT 4 (PAD4); CONTAINS InterPro DOMAIN/s: Lipase, class 3 (InterPro:IPR002921); BEST Arabidopsis thaliana protein match is: senescence-associated gene 101 (TAIR:AT5G14930.2); Has 722 Blast hits to 622 proteins in 73 species: Archae - 0; Bacteria - 23; Metazoa - 17; Fungi - 11; Plants - 620; Viruses - 1; Other Eukaryotes - 50 (source: NCBI BLink).	-0.554693	NS	NS	NS	NS	NS	NS	NS	NS	NS
AT3G52800	AT3G52800	A20/AN1-like zinc finger family protein; FUNCTIONS IN: DNA binding, zinc ion binding; INVOLVED IN: response to chitin; LOCATED IN: cellular_component unknown; EXPRESSED IN: 23 plant structures; EXPRESSED DURING: 15 growth stages; CONTAINS InterPro DOMAIN/s: Zinc finger, AN1-type (InterPro:IPR000058), Zinc finger, A20-type (InterPro:IPR002653); BEST Arabidopsis thaliana protein match is: A20/AN1-l…	-0.763864	NS	NS	NS	NS	NS	0.705728	NS	NS	0.662341
AT3G56880	AT3G56880	VQ motif-containing protein; CONTAINS InterPro DOMAIN/s: VQ (InterPro:IPR008889); BEST Arabidopsis thaliana protein match is: calmodulin (CAM)-binding protein of 25 kDa (TAIR:AT2G41010.1); Has 109 Blast hits to 109 proteins in 12 species: Archae - 0; Bacteria - 0; Metazoa - 0; Fungi - 3; Plants - 106; Viruses - 0; Other Eukaryotes - 0 (source: NCBI BLink).	-0.800108	NS	NS	NS	NS	NS	NS	NS	NS	NS
AT4G29780	AT4G29780	unknown protein; BEST Arabidopsis thaliana protein match is: unknown protein (TAIR:AT5G12010.1); Has 945 Blast hits to 944 proteins in 87 species: Archae - 0; Bacteria - 0; Metazoa - 519; Fungi - 43; Plants - 365; Viruses - 0; Other Eukaryotes - 18 (source: NCBI BLink).	-2.14798	NS	NS	NS	-0.842789	NS	NS	NS	NS	NS
AT5G42050	AT5G42050	DCD (Development and Cell Death) domain protein; CONTAINS InterPro DOMAIN/s: Development/cell death domain (InterPro:IPR013989), Kelch related (InterPro:IPR013089); BEST Arabidopsis thaliana protein match is: DCD (Development and Cell Death) domain protein (TAIR:AT3G27090.1); Has 30201 Blast hits to 17322 proteins in 780 species: Archae - 12; Bacteria - 1396; Metazoa - 17338; Fungi - 3422; Plants…	-0.555228	NS	NS	NS	NS	NS	NS	NS	NS	NS
LBD23 target
ATAF1	AT1G01720	ATAF1; CONTAINS InterPro DOMAIN/s: No apical meristem (NAM) protein (InterPro:IPR003441); BEST Arabidopsis thaliana protein match is: NAC domain containing protein 32 (TAIR:AT1G77450.1); Has 3043 Blast hits to 3037 proteins in 75 species: Archae - 0; Bacteria - 0; Metazoa - 0; Fungi - 0; Plants - 3043; Viruses - 0; Other Eukaryotes - 0 (source: NCBI BLink).	-0.411378	NS	NS	NS	NS	NS	NS	NS	NS	NS
UCP5	AT2G22500	uncoupling protein 5 (UCP5); FUNCTIONS IN: binding, dicarboxylic acid transmembrane transporter activity; INVOLVED IN: transport, mitochondrial transport; LOCATED IN: mitochondrion, mitochondrial inner membrane, membrane; EXPRESSED IN: 23 plant structures; EXPRESSED DURING: 15 growth stages; CONTAINS InterPro DOMAIN/s: Mitochondrial substrate carrier (InterPro:IPR001993), Mitochondrial brown fat …	-0.692409	NS	NS	NS	NS	NS	NS	NS	NS	0.39847
AT2G36220	AT2G36220	unknown protein; BEST Arabidopsis thaliana protein match is: unknown protein (TAIR:AT3G52710.1); Has 74 Blast hits to 74 proteins in 10 species: Archae - 0; Bacteria - 0; Metazoa - 0; Fungi - 0; Plants - 74; Viruses - 0; Other Eukaryotes - 0 (source: NCBI BLink).	-1.04098	NS	NS	NS	-0.585502	NS	0.469952	NS	NS	0.791781
ERF4	AT3G15210	ethylene responsive element binding factor 4 (ERF4); CONTAINS InterPro DOMAIN/s: DNA-binding, integrase-type (InterPro:IPR016177), Pathogenesis-related transcriptional factor/ERF, DNA-binding (InterPro:IPR001471); BEST Arabidopsis thaliana protein match is: ethylene response factor 8 (TAIR:AT1G53170.1); Has 6170 Blast hits to 5786 proteins in 253 species: Archae - 0; Bacteria - 0; Metazoa - 0; Fu…	-0.589249	NS	NS	NS	NS	NS	NS	NS	NS	NS
AGC2-1	AT3G25250	AGC2-1; FUNCTIONS IN: kinase activity; INVOLVED IN: protein amino acid phosphorylation; LOCATED IN: cellular_component unknown; EXPRESSED IN: hypocotyl, root, stamen, pollen tube; EXPRESSED DURING: 4 anthesis, petal differentiation and expansion stage; CONTAINS InterPro DOMAIN/s: Protein kinase, catalytic domain (InterPro:IPR000719), Serine/threonine-protein kinase domain (InterPro:IPR002290), Se…	-0.86217	NS	NS	NS	NS	NS	NS	NS	NS	NS
PAD4	AT3G52430	PHYTOALEXIN DEFICIENT 4 (PAD4); CONTAINS InterPro DOMAIN/s: Lipase, class 3 (InterPro:IPR002921); BEST Arabidopsis thaliana protein match is: senescence-associated gene 101 (TAIR:AT5G14930.2); Has 722 Blast hits to 622 proteins in 73 species: Archae - 0; Bacteria - 23; Metazoa - 17; Fungi - 11; Plants - 620; Viruses - 1; Other Eukaryotes - 50 (source: NCBI BLink).	-0.554693	NS	NS	NS	NS	NS	NS	NS	NS	NS
AT3G52800	AT3G52800	A20/AN1-like zinc finger family protein; FUNCTIONS IN: DNA binding, zinc ion binding; INVOLVED IN: response to chitin; LOCATED IN: cellular_component unknown; EXPRESSED IN: 23 plant structures; EXPRESSED DURING: 15 growth stages; CONTAINS InterPro DOMAIN/s: Zinc finger, AN1-type (InterPro:IPR000058), Zinc finger, A20-type (InterPro:IPR002653); BEST Arabidopsis thaliana protein match is: A20/AN1-l…	-0.763864	NS	NS	NS	NS	NS	0.705728	NS	NS	0.662341
AT4G29780	AT4G29780	unknown protein; BEST Arabidopsis thaliana protein match is: unknown protein (TAIR:AT5G12010.1); Has 945 Blast hits to 944 proteins in 87 species: Archae - 0; Bacteria - 0; Metazoa - 519; Fungi - 43; Plants - 365; Viruses - 0; Other Eukaryotes - 18 (source: NCBI BLink).	-2.14798	NS	NS	NS	-0.842789	NS	NS	NS	NS	NS
AT5G66650	AT5G66650	Protein of unknown function (DUF607); CONTAINS InterPro DOMAIN/s: Protein of unknown function DUF607 (InterPro:IPR006769); BEST Arabidopsis thaliana protein match is: Protein of unknown function (DUF607) (TAIR:AT2G23790.1); Has 1807 Blast hits to 1807 proteins in 277 species: Archae - 0; Bacteria - 0; Metazoa - 736; Fungi - 347; Plants - 385; Viruses - 0; Other Eukaryotes - 339 (source: NCBI BLin…	-0.7945	NS	NS	NS	NS	NS	0.704774	NS	NS	NS
SEPALLATA3 target
GAE1	AT4G30440	UDP-D-glucuronate 4-epimerase 1 (GAE1); FUNCTIONS IN: UDP-glucuronate 4-epimerase activity, catalytic activity; INVOLVED IN: cellular metabolic process, carbohydrate metabolic process, nucleotide-sugar metabolic process, metabolic process; LOCATED IN: cellular_component unknown; EXPRESSED IN: 24 plant structures; EXPRESSED DURING: 15 growth stages; CONTAINS InterPro DOMAIN/s: NAD-dependent epimer…	-0.572339	NS	NS	NS	NS	NS	NS	NS	NS	NS
AT4G29780	AT4G29780	unknown protein; BEST Arabidopsis thaliana protein match is: unknown protein (TAIR:AT5G12010.1); Has 945 Blast hits to 944 proteins in 87 species: Archae - 0; Bacteria - 0; Metazoa - 519; Fungi - 43; Plants - 365; Viruses - 0; Other Eukaryotes - 18 (source: NCBI BLink).	-2.14798	NS	NS	NS	-0.842789	NS	NS	NS	NS	NS
AT3G56880	AT3G56880	VQ motif-containing protein; CONTAINS InterPro DOMAIN/s: VQ (InterPro:IPR008889); BEST Arabidopsis thaliana protein match is: calmodulin (CAM)-binding protein of 25 kDa (TAIR:AT2G41010.1); Has 109 Blast hits to 109 proteins in 12 species: Archae - 0; Bacteria - 0; Metazoa - 0; Fungi - 3; Plants - 106; Viruses - 0; Other Eukaryotes - 0 (source: NCBI BLink).	-0.800108	NS	NS	NS	NS	NS	NS	NS	NS	NS
SZF1	AT3G55980	salt-inducible zinc finger 1 (SZF1); CONTAINS InterPro DOMAIN/s: Zinc finger, CCCH-type (InterPro:IPR000571), Ankyrin repeat-containing domain (InterPro:IPR020683), Ankyrin repeat (InterPro:IPR002110); BEST Arabidopsis thaliana protein match is: zinc finger (CCCH-type) family protein (TAIR:AT2G40140.2); Has 1623 Blast hits to 1414 proteins in 181 species: Archae - 2; Bacteria - 49; Metazoa - 777;…	-1.24553	NS	NS	NS	NS	NS	NS	NS	NS	NS
PAD4	AT3G52430	PHYTOALEXIN DEFICIENT 4 (PAD4); CONTAINS InterPro DOMAIN/s: Lipase, class 3 (InterPro:IPR002921); BEST Arabidopsis thaliana protein match is: senescence-associated gene 101 (TAIR:AT5G14930.2); Has 722 Blast hits to 622 proteins in 73 species: Archae - 0; Bacteria - 23; Metazoa - 17; Fungi - 11; Plants - 620; Viruses - 1; Other Eukaryotes - 50 (source: NCBI BLink).	-0.554693	NS	NS	NS	NS	NS	NS	NS	NS	NS
MYB30	AT3G28910	myb domain protein 30 (MYB30); CONTAINS InterPro DOMAIN/s: SANT, DNA-binding (InterPro:IPR001005), Homeodomain-like (InterPro:IPR009057), Myb, DNA-binding (InterPro:IPR014778), HTH transcriptional regulator, Myb-type, DNA-binding (InterPro:IPR017930), Homeodomain-related (InterPro:IPR012287), Myb transcription factor (InterPro:IPR015495); BEST Arabidopsis thaliana protein match is: myb domain pro…	-0.509911	NS	NS	NS	NS	NS	NS	NS	NS	NS
ERF4	AT3G15210	ethylene responsive element binding factor 4 (ERF4); CONTAINS InterPro DOMAIN/s: DNA-binding, integrase-type (InterPro:IPR016177), Pathogenesis-related transcriptional factor/ERF, DNA-binding (InterPro:IPR001471); BEST Arabidopsis thaliana protein match is: ethylene response factor 8 (TAIR:AT1G53170.1); Has 6170 Blast hits to 5786 proteins in 253 species: Archae - 0; Bacteria - 0; Metazoa - 0; Fu…	-0.589249	NS	NS	NS	NS	NS	NS	NS	NS	NS
CAMBP25	AT2G41010	calmodulin (CAM)-binding protein of 25 kDa (CAMBP25); CONTAINS InterPro DOMAIN/s: VQ (InterPro:IPR008889); BEST Arabidopsis thaliana protein match is: VQ motif-containing protein (TAIR:AT3G56880.1); Has 142 Blast hits to 142 proteins in 12 species: Archae - 0; Bacteria - 0; Metazoa - 0; Fungi - 0; Plants - 142; Viruses - 0; Other Eukaryotes - 0 (source: NCBI BLink).	-0.801834	NS	NS	NS	NS	NS	NS	NS	NS	NS
CZF1	AT2G40140	CZF1; CONTAINS InterPro DOMAIN/s: Zinc finger, CCCH-type (InterPro:IPR000571), Ankyrin repeat-containing domain (InterPro:IPR020683), Ankyrin repeat (InterPro:IPR002110); BEST Arabidopsis thaliana protein match is: salt-inducible zinc finger 1 (TAIR:AT3G55980.1); Has 1196 Blast hits to 1143 proteins in 183 species: Archae - 4; Bacteria - 47; Metazoa - 401; Fungi - 61; Plants - 441; Viruses - 2; O…	-0.769874	NS	NS	NS	NS	NS	NS	NS	NS	NS
HSPRO2	AT2G40000	ortholog of sugar beet HS1 PRO-1 2 (HSPRO2); CONTAINS InterPro DOMAIN/s: Hs1pro-1, C-terminal (InterPro:IPR009743), Hs1pro-1, N-terminal (InterPro:IPR009869); BEST Arabidopsis thaliana protein match is: Hs1pro-1 protein (TAIR:AT3G55840.1); Has 71 Blast hits to 71 proteins in 18 species: Archae - 0; Bacteria - 0; Metazoa - 0; Fungi - 0; Plants - 60; Viruses - 0; Other Eukaryotes - 11 (source: NCBI…	-0.906802	NS	NS	NS	NS	NS	0.77457	NS	NS	1.16558
AT2G36580	AT2G36580	Pyruvate kinase family protein; FUNCTIONS IN: pyruvate kinase activity, potassium ion binding, magnesium ion binding, catalytic activity; INVOLVED IN: glycolysis; LOCATED IN: plasma membrane; EXPRESSED IN: guard cell; CONTAINS InterPro DOMAIN/s: Pyruvate/Phosphoenolpyruvate kinase, catalytic core (InterPro:IPR015813), Pyruvate kinase, alpha/beta (InterPro:IPR015794), Pyruvate kinase, beta-barrel-…	-0.380413	-0.654796	-0.756851	NS	-0.743803	NS	NS	NS	NS	NS
AT2G36220	AT2G36220	unknown protein; BEST Arabidopsis thaliana protein match is: unknown protein (TAIR:AT3G52710.1); Has 74 Blast hits to 74 proteins in 10 species: Archae - 0; Bacteria - 0; Metazoa - 0; Fungi - 0; Plants - 74; Viruses - 0; Other Eukaryotes - 0 (source: NCBI BLink).	-1.04098	NS	NS	NS	-0.585502	NS	0.469952	NS	NS	0.791781
RHA2B	AT2G01150	RING-H2 finger protein 2B (RHA2B); CONTAINS InterPro DOMAIN/s: Zinc finger, RING-type (InterPro:IPR001841), Zinc finger, C3HC4 RING-type (InterPro:IPR018957); BEST Arabidopsis thaliana protein match is: RING-H2 finger A2A (TAIR:AT1G15100.1); Has 8536 Blast hits to 8514 proteins in 269 species: Archae - 0; Bacteria - 0; Metazoa - 2151; Fungi - 713; Plants - 4534; Viruses - 16; Other Eukaryotes - 1…	-0.987027	NS	NS	NS	NS	NS	NS	NS	NS	NS
OPR1	AT1G76680	12-oxophytodienoate reductase 1 (OPR1); FUNCTIONS IN: 12-oxophytodienoate reductase activity; INVOLVED IN: in 7 processes; LOCATED IN: cellular_component unknown; EXPRESSED IN: 11 plant structures; EXPRESSED DURING: seedling growth, developing seed stage; CONTAINS InterPro DOMAIN/s: NADH:flavin oxidoreductase/NADH oxidase, N-terminal (InterPro:IPR001155), Aldolase-type TIM barrel (InterPro:IPR013…	-0.408491	NS	NS	-0.569227	NS	NS	NS	NS	NS	NS
PME1	AT1G53840	pectin methylesterase 1 (PME1); FUNCTIONS IN: pectinesterase activity; INVOLVED IN: cell wall modification; LOCATED IN: extracellular region, plasma membrane, membrane, plant-type cell wall; EXPRESSED IN: 24 plant structures; EXPRESSED DURING: 13 growth stages; CONTAINS InterPro DOMAIN/s: Pectinesterase, active site (InterPro:IPR018040), Pectin lyase fold/virulence factor (InterPro:IPR011050), Pe…	-0.498534	NS	NS	NS	NS	NS	NS	NS	NS	NS
AT1G23710	AT1G23710	Protein of unknown function (DUF1645); CONTAINS InterPro DOMAIN/s: Protein of unknown function DUF1645 (InterPro:IPR012442); BEST Arabidopsis thaliana protein match is: Protein of unknown function (DUF1645) (TAIR:AT1G70420.1); Has 288 Blast hits to 282 proteins in 52 species: Archae - 0; Bacteria - 6; Metazoa - 16; Fungi - 11; Plants - 191; Viruses - 0; Other Eukaryotes - 64 (source: NCBI BLink).	-0.604273	NS	NS	NS	NS	NS	NS	NS	NS	NS
SRC2	AT1G09070	soybean gene regulated by cold-2 (SRC2); CONTAINS InterPro DOMAIN/s: C2 calcium/lipid-binding domain, CaLB (InterPro:IPR008973), C2 calcium-dependent membrane targeting (InterPro:IPR000008); BEST Arabidopsis thaliana protein match is: Calcium-dependent lipid-binding (CaLB domain) family protein (TAIR:AT3G16510.1); Has 25146 Blast hits to 15856 proteins in 1076 species: Archae - 6; Bacteria - 3010…	-0.916716	NS	NS	NS	NS	NS	NS	NS	NS	0.581027
MAPKKK13	AT1G07150	mitogen-activated protein kinase kinase kinase 13 (MAPKKK13); FUNCTIONS IN: protein serine/threonine kinase activity, protein kinase activity, kinase activity, ATP binding; INVOLVED IN: protein amino acid phosphorylation; EXPRESSED IN: 8 plant structures; EXPRESSED DURING: LP.04 four leaves visible, 4 anthesis, LP.10 ten leaves visible, petal differentiation and expansion stage; CONTAINS InterPro…	-0.867993	NS	NS	NS	NS	NS	NS	NS	NS	NS
AT1G07135	AT1G07135	glycine-rich protein; Has 22251 Blast hits to 8348 proteins in 789 species: Archae - 21; Bacteria - 7328; Metazoa - 6126; Fungi - 1280; Plants - 3980; Viruses - 524; Other Eukaryotes - 2992 (source: NCBI BLink).	-1.81186	NS	NS	NS	NS	NS	NS	NS	NS	NS
ATAF1	AT1G01720	ATAF1; CONTAINS InterPro DOMAIN/s: No apical meristem (NAM) protein (InterPro:IPR003441); BEST Arabidopsis thaliana protein match is: NAC domain containing protein 32 (TAIR:AT1G77450.1); Has 3043 Blast hits to 3037 proteins in 75 species: Archae - 0; Bacteria - 0; Metazoa - 0; Fungi - 0; Plants - 3043; Viruses - 0; Other Eukaryotes - 0 (source: NCBI BLink).	-0.411378	NS	NS	NS	NS	NS	NS	NS	NS	NS
AGC2-1	AT3G25250	AGC2-1; FUNCTIONS IN: kinase activity; INVOLVED IN: protein amino acid phosphorylation; LOCATED IN: cellular_component unknown; EXPRESSED IN: hypocotyl, root, stamen, pollen tube; EXPRESSED DURING: 4 anthesis, petal differentiation and expansion stage; CONTAINS InterPro DOMAIN/s: Protein kinase, catalytic domain (InterPro:IPR000719), Serine/threonine-protein kinase domain (InterPro:IPR002290), Se…	-0.86217	NS	NS	NS	NS	NS	NS	NS	NS	NS
AT3G52800	AT3G52800	A20/AN1-like zinc finger family protein; FUNCTIONS IN: DNA binding, zinc ion binding; INVOLVED IN: response to chitin; LOCATED IN: cellular_component unknown; EXPRESSED IN: 23 plant structures; EXPRESSED DURING: 15 growth stages; CONTAINS InterPro DOMAIN/s: Zinc finger, AN1-type (InterPro:IPR000058), Zinc finger, A20-type (InterPro:IPR002653); BEST Arabidopsis thaliana protein match is: A20/AN1-l…	-0.763864	NS	NS	NS	NS	NS	0.705728	NS	NS	0.662341
RAV2	AT1G68840	related to ABI3/VP1 2 (RAV2); FUNCTIONS IN: transcription repressor activity, DNA binding, sequence-specific DNA binding transcription factor activity; INVOLVED IN: regulation of transcription, DNA-dependent; LOCATED IN: chloroplast; EXPRESSED IN: 12 plant structures; EXPRESSED DURING: 8 growth stages; CONTAINS InterPro DOMAIN/s: DNA-binding, integrase-type (InterPro:IPR016177), Transcriptional f…	-0.752919	NS	NS	-0.875153	NS	NS	1.29488	NS	0.736484	1.31852
BZIP16 target
ATAF1	AT1G01720	ATAF1; CONTAINS InterPro DOMAIN/s: No apical meristem (NAM) protein (InterPro:IPR003441); BEST Arabidopsis thaliana protein match is: NAC domain containing protein 32 (TAIR:AT1G77450.1); Has 3043 Blast hits to 3037 proteins in 75 species: Archae - 0; Bacteria - 0; Metazoa - 0; Fungi - 0; Plants - 3043; Viruses - 0; Other Eukaryotes - 0 (source: NCBI BLink).	-0.411378	NS	NS	NS	NS	NS	NS	NS	NS	NS
MAPKKK13	AT1G07150	mitogen-activated protein kinase kinase kinase 13 (MAPKKK13); FUNCTIONS IN: protein serine/threonine kinase activity, protein kinase activity, kinase activity, ATP binding; INVOLVED IN: protein amino acid phosphorylation; EXPRESSED IN: 8 plant structures; EXPRESSED DURING: LP.04 four leaves visible, 4 anthesis, LP.10 ten leaves visible, petal differentiation and expansion stage; CONTAINS InterPro…	-0.867993	NS	NS	NS	NS	NS	NS	NS	NS	NS
UCP5	AT2G22500	uncoupling protein 5 (UCP5); FUNCTIONS IN: binding, dicarboxylic acid transmembrane transporter activity; INVOLVED IN: transport, mitochondrial transport; LOCATED IN: mitochondrion, mitochondrial inner membrane, membrane; EXPRESSED IN: 23 plant structures; EXPRESSED DURING: 15 growth stages; CONTAINS InterPro DOMAIN/s: Mitochondrial substrate carrier (InterPro:IPR001993), Mitochondrial brown fat …	-0.692409	NS	NS	NS	NS	NS	NS	NS	NS	0.39847
AT2G36220	AT2G36220	unknown protein; BEST Arabidopsis thaliana protein match is: unknown protein (TAIR:AT3G52710.1); Has 74 Blast hits to 74 proteins in 10 species: Archae - 0; Bacteria - 0; Metazoa - 0; Fungi - 0; Plants - 74; Viruses - 0; Other Eukaryotes - 0 (source: NCBI BLink).	-1.04098	NS	NS	NS	-0.585502	NS	0.469952	NS	NS	0.791781
CAMBP25	AT2G41010	calmodulin (CAM)-binding protein of 25 kDa (CAMBP25); CONTAINS InterPro DOMAIN/s: VQ (InterPro:IPR008889); BEST Arabidopsis thaliana protein match is: VQ motif-containing protein (TAIR:AT3G56880.1); Has 142 Blast hits to 142 proteins in 12 species: Archae - 0; Bacteria - 0; Metazoa - 0; Fungi - 0; Plants - 142; Viruses - 0; Other Eukaryotes - 0 (source: NCBI BLink).	-0.801834	NS	NS	NS	NS	NS	NS	NS	NS	NS
AT3G52800	AT3G52800	A20/AN1-like zinc finger family protein; FUNCTIONS IN: DNA binding, zinc ion binding; INVOLVED IN: response to chitin; LOCATED IN: cellular_component unknown; EXPRESSED IN: 23 plant structures; EXPRESSED DURING: 15 growth stages; CONTAINS InterPro DOMAIN/s: Zinc finger, AN1-type (InterPro:IPR000058), Zinc finger, A20-type (InterPro:IPR002653); BEST Arabidopsis thaliana protein match is: A20/AN1-l…	-0.763864	NS	NS	NS	NS	NS	0.705728	NS	NS	0.662341
AT4G29780	AT4G29780	unknown protein; BEST Arabidopsis thaliana protein match is: unknown protein (TAIR:AT5G12010.1); Has 945 Blast hits to 944 proteins in 87 species: Archae - 0; Bacteria - 0; Metazoa - 519; Fungi - 43; Plants - 365; Viruses - 0; Other Eukaryotes - 18 (source: NCBI BLink).	-2.14798	NS	NS	NS	-0.842789	NS	NS	NS	NS	NS
GAE1	AT4G30440	UDP-D-glucuronate 4-epimerase 1 (GAE1); FUNCTIONS IN: UDP-glucuronate 4-epimerase activity, catalytic activity; INVOLVED IN: cellular metabolic process, carbohydrate metabolic process, nucleotide-sugar metabolic process, metabolic process; LOCATED IN: cellular_component unknown; EXPRESSED IN: 24 plant structures; EXPRESSED DURING: 15 growth stages; CONTAINS InterPro DOMAIN/s: NAD-dependent epimer…	-0.572339	NS	NS	NS	NS	NS	NS	NS	NS	NS
AT5G66650	AT5G66650	Protein of unknown function (DUF607); CONTAINS InterPro DOMAIN/s: Protein of unknown function DUF607 (InterPro:IPR006769); BEST Arabidopsis thaliana protein match is: Protein of unknown function (DUF607) (TAIR:AT2G23790.1); Has 1807 Blast hits to 1807 proteins in 277 species: Archae - 0; Bacteria - 0; Metazoa - 736; Fungi - 347; Plants - 385; Viruses - 0; Other Eukaryotes - 339 (source: NCBI BLin…	-0.7945	NS	NS	NS	NS	NS	0.704774	NS	NS	NS
AT2G15740 target
ATAF1	AT1G01720	ATAF1; CONTAINS InterPro DOMAIN/s: No apical meristem (NAM) protein (InterPro:IPR003441); BEST Arabidopsis thaliana protein match is: NAC domain containing protein 32 (TAIR:AT1G77450.1); Has 3043 Blast hits to 3037 proteins in 75 species: Archae - 0; Bacteria - 0; Metazoa - 0; Fungi - 0; Plants - 3043; Viruses - 0; Other Eukaryotes - 0 (source: NCBI BLink).	-0.411378	NS	NS	NS	NS	NS	NS	NS	NS	NS
SRC2	AT1G09070	soybean gene regulated by cold-2 (SRC2); CONTAINS InterPro DOMAIN/s: C2 calcium/lipid-binding domain, CaLB (InterPro:IPR008973), C2 calcium-dependent membrane targeting (InterPro:IPR000008); BEST Arabidopsis thaliana protein match is: Calcium-dependent lipid-binding (CaLB domain) family protein (TAIR:AT3G16510.1); Has 25146 Blast hits to 15856 proteins in 1076 species: Archae - 6; Bacteria - 3010…	-0.916716	NS	NS	NS	NS	NS	NS	NS	NS	0.581027
NUDT4	AT1G18300	nudix hydrolase homolog 4 (NUDT4); FUNCTIONS IN: hydrolase activity; LOCATED IN: cytosol; EXPRESSED IN: stem, root, leaf; CONTAINS InterPro DOMAIN/s: NUDIX hydrolase domain-like (InterPro:IPR015797), NUDIX hydrolase, conserved site (InterPro:IPR020084), NUDIX hydrolase domain (InterPro:IPR000086); BEST Arabidopsis thaliana protein match is: nudix hydrolase homolog 21 (TAIR:AT1G73540.1); Has 1264 …	-1.62969	NS	NS	NS	NS	NS	NS	NS	NS	NS
AT1G23710	AT1G23710	Protein of unknown function (DUF1645); CONTAINS InterPro DOMAIN/s: Protein of unknown function DUF1645 (InterPro:IPR012442); BEST Arabidopsis thaliana protein match is: Protein of unknown function (DUF1645) (TAIR:AT1G70420.1); Has 288 Blast hits to 282 proteins in 52 species: Archae - 0; Bacteria - 6; Metazoa - 16; Fungi - 11; Plants - 191; Viruses - 0; Other Eukaryotes - 64 (source: NCBI BLink).	-0.604273	NS	NS	NS	NS	NS	NS	NS	NS	NS
RAV2	AT1G68840	related to ABI3/VP1 2 (RAV2); FUNCTIONS IN: transcription repressor activity, DNA binding, sequence-specific DNA binding transcription factor activity; INVOLVED IN: regulation of transcription, DNA-dependent; LOCATED IN: chloroplast; EXPRESSED IN: 12 plant structures; EXPRESSED DURING: 8 growth stages; CONTAINS InterPro DOMAIN/s: DNA-binding, integrase-type (InterPro:IPR016177), Transcriptional f…	-0.752919	NS	NS	-0.875153	NS	NS	1.29488	NS	0.736484	1.31852
UCP5	AT2G22500	uncoupling protein 5 (UCP5); FUNCTIONS IN: binding, dicarboxylic acid transmembrane transporter activity; INVOLVED IN: transport, mitochondrial transport; LOCATED IN: mitochondrion, mitochondrial inner membrane, membrane; EXPRESSED IN: 23 plant structures; EXPRESSED DURING: 15 growth stages; CONTAINS InterPro DOMAIN/s: Mitochondrial substrate carrier (InterPro:IPR001993), Mitochondrial brown fat …	-0.692409	NS	NS	NS	NS	NS	NS	NS	NS	0.39847
HSPRO2	AT2G40000	ortholog of sugar beet HS1 PRO-1 2 (HSPRO2); CONTAINS InterPro DOMAIN/s: Hs1pro-1, C-terminal (InterPro:IPR009743), Hs1pro-1, N-terminal (InterPro:IPR009869); BEST Arabidopsis thaliana protein match is: Hs1pro-1 protein (TAIR:AT3G55840.1); Has 71 Blast hits to 71 proteins in 18 species: Archae - 0; Bacteria - 0; Metazoa - 0; Fungi - 0; Plants - 60; Viruses - 0; Other Eukaryotes - 11 (source: NCBI…	-0.906802	NS	NS	NS	NS	NS	0.77457	NS	NS	1.16558
ERF4	AT3G15210	ethylene responsive element binding factor 4 (ERF4); CONTAINS InterPro DOMAIN/s: DNA-binding, integrase-type (InterPro:IPR016177), Pathogenesis-related transcriptional factor/ERF, DNA-binding (InterPro:IPR001471); BEST Arabidopsis thaliana protein match is: ethylene response factor 8 (TAIR:AT1G53170.1); Has 6170 Blast hits to 5786 proteins in 253 species: Archae - 0; Bacteria - 0; Metazoa - 0; Fu…	-0.589249	NS	NS	NS	NS	NS	NS	NS	NS	NS
AGC2-1	AT3G25250	AGC2-1; FUNCTIONS IN: kinase activity; INVOLVED IN: protein amino acid phosphorylation; LOCATED IN: cellular_component unknown; EXPRESSED IN: hypocotyl, root, stamen, pollen tube; EXPRESSED DURING: 4 anthesis, petal differentiation and expansion stage; CONTAINS InterPro DOMAIN/s: Protein kinase, catalytic domain (InterPro:IPR000719), Serine/threonine-protein kinase domain (InterPro:IPR002290), Se…	-0.86217	NS	NS	NS	NS	NS	NS	NS	NS	NS
PAD4	AT3G52430	PHYTOALEXIN DEFICIENT 4 (PAD4); CONTAINS InterPro DOMAIN/s: Lipase, class 3 (InterPro:IPR002921); BEST Arabidopsis thaliana protein match is: senescence-associated gene 101 (TAIR:AT5G14930.2); Has 722 Blast hits to 622 proteins in 73 species: Archae - 0; Bacteria - 23; Metazoa - 17; Fungi - 11; Plants - 620; Viruses - 1; Other Eukaryotes - 50 (source: NCBI BLink).	-0.554693	NS	NS	NS	NS	NS	NS	NS	NS	NS
AT4G29780	AT4G29780	unknown protein; BEST Arabidopsis thaliana protein match is: unknown protein (TAIR:AT5G12010.1); Has 945 Blast hits to 944 proteins in 87 species: Archae - 0; Bacteria - 0; Metazoa - 519; Fungi - 43; Plants - 365; Viruses - 0; Other Eukaryotes - 18 (source: NCBI BLink).	-2.14798	NS	NS	NS	-0.842789	NS	NS	NS	NS	NS
GAE1	AT4G30440	UDP-D-glucuronate 4-epimerase 1 (GAE1); FUNCTIONS IN: UDP-glucuronate 4-epimerase activity, catalytic activity; INVOLVED IN: cellular metabolic process, carbohydrate metabolic process, nucleotide-sugar metabolic process, metabolic process; LOCATED IN: cellular_component unknown; EXPRESSED IN: 24 plant structures; EXPRESSED DURING: 15 growth stages; CONTAINS InterPro DOMAIN/s: NAD-dependent epimer…	-0.572339	NS	NS	NS	NS	NS	NS	NS	NS	NS
AT5G42050	AT5G42050	DCD (Development and Cell Death) domain protein; CONTAINS InterPro DOMAIN/s: Development/cell death domain (InterPro:IPR013989), Kelch related (InterPro:IPR013089); BEST Arabidopsis thaliana protein match is: DCD (Development and Cell Death) domain protein (TAIR:AT3G27090.1); Has 30201 Blast hits to 17322 proteins in 780 species: Archae - 12; Bacteria - 1396; Metazoa - 17338; Fungi - 3422; Plants…	-0.555228	NS	NS	NS	NS	NS	NS	NS	NS	NS
AT5G66650	AT5G66650	Protein of unknown function (DUF607); CONTAINS InterPro DOMAIN/s: Protein of unknown function DUF607 (InterPro:IPR006769); BEST Arabidopsis thaliana protein match is: Protein of unknown function (DUF607) (TAIR:AT2G23790.1); Has 1807 Blast hits to 1807 proteins in 277 species: Archae - 0; Bacteria - 0; Metazoa - 736; Fungi - 347; Plants - 385; Viruses - 0; Other Eukaryotes - 339 (source: NCBI BLin…	-0.7945	NS	NS	NS	NS	NS	0.704774	NS	NS	NS
SPL14 target
MAPKKK13	AT1G07150	mitogen-activated protein kinase kinase kinase 13 (MAPKKK13); FUNCTIONS IN: protein serine/threonine kinase activity, protein kinase activity, kinase activity, ATP binding; INVOLVED IN: protein amino acid phosphorylation; EXPRESSED IN: 8 plant structures; EXPRESSED DURING: LP.04 four leaves visible, 4 anthesis, LP.10 ten leaves visible, petal differentiation and expansion stage; CONTAINS InterPro…	-0.867993	NS	NS	NS	NS	NS	NS	NS	NS	NS
AT1G23710	AT1G23710	Protein of unknown function (DUF1645); CONTAINS InterPro DOMAIN/s: Protein of unknown function DUF1645 (InterPro:IPR012442); BEST Arabidopsis thaliana protein match is: Protein of unknown function (DUF1645) (TAIR:AT1G70420.1); Has 288 Blast hits to 282 proteins in 52 species: Archae - 0; Bacteria - 6; Metazoa - 16; Fungi - 11; Plants - 191; Viruses - 0; Other Eukaryotes - 64 (source: NCBI BLink).	-0.604273	NS	NS	NS	NS	NS	NS	NS	NS	NS
RAV2	AT1G68840	related to ABI3/VP1 2 (RAV2); FUNCTIONS IN: transcription repressor activity, DNA binding, sequence-specific DNA binding transcription factor activity; INVOLVED IN: regulation of transcription, DNA-dependent; LOCATED IN: chloroplast; EXPRESSED IN: 12 plant structures; EXPRESSED DURING: 8 growth stages; CONTAINS InterPro DOMAIN/s: DNA-binding, integrase-type (InterPro:IPR016177), Transcriptional f…	-0.752919	NS	NS	-0.875153	NS	NS	1.29488	NS	0.736484	1.31852
OPR1	AT1G76680	12-oxophytodienoate reductase 1 (OPR1); FUNCTIONS IN: 12-oxophytodienoate reductase activity; INVOLVED IN: in 7 processes; LOCATED IN: cellular_component unknown; EXPRESSED IN: 11 plant structures; EXPRESSED DURING: seedling growth, developing seed stage; CONTAINS InterPro DOMAIN/s: NADH:flavin oxidoreductase/NADH oxidase, N-terminal (InterPro:IPR001155), Aldolase-type TIM barrel (InterPro:IPR013…	-0.408491	NS	NS	-0.569227	NS	NS	NS	NS	NS	NS
AT2G36580	AT2G36580	Pyruvate kinase family protein; FUNCTIONS IN: pyruvate kinase activity, potassium ion binding, magnesium ion binding, catalytic activity; INVOLVED IN: glycolysis; LOCATED IN: plasma membrane; EXPRESSED IN: guard cell; CONTAINS InterPro DOMAIN/s: Pyruvate/Phosphoenolpyruvate kinase, catalytic core (InterPro:IPR015813), Pyruvate kinase, alpha/beta (InterPro:IPR015794), Pyruvate kinase, beta-barrel-…	-0.380413	-0.654796	-0.756851	NS	-0.743803	NS	NS	NS	NS	NS
CAMBP25	AT2G41010	calmodulin (CAM)-binding protein of 25 kDa (CAMBP25); CONTAINS InterPro DOMAIN/s: VQ (InterPro:IPR008889); BEST Arabidopsis thaliana protein match is: VQ motif-containing protein (TAIR:AT3G56880.1); Has 142 Blast hits to 142 proteins in 12 species: Archae - 0; Bacteria - 0; Metazoa - 0; Fungi - 0; Plants - 142; Viruses - 0; Other Eukaryotes - 0 (source: NCBI BLink).	-0.801834	NS	NS	NS	NS	NS	NS	NS	NS	NS
ERF4	AT3G15210	ethylene responsive element binding factor 4 (ERF4); CONTAINS InterPro DOMAIN/s: DNA-binding, integrase-type (InterPro:IPR016177), Pathogenesis-related transcriptional factor/ERF, DNA-binding (InterPro:IPR001471); BEST Arabidopsis thaliana protein match is: ethylene response factor 8 (TAIR:AT1G53170.1); Has 6170 Blast hits to 5786 proteins in 253 species: Archae - 0; Bacteria - 0; Metazoa - 0; Fu…	-0.589249	NS	NS	NS	NS	NS	NS	NS	NS	NS
AT3G56880	AT3G56880	VQ motif-containing protein; CONTAINS InterPro DOMAIN/s: VQ (InterPro:IPR008889); BEST Arabidopsis thaliana protein match is: calmodulin (CAM)-binding protein of 25 kDa (TAIR:AT2G41010.1); Has 109 Blast hits to 109 proteins in 12 species: Archae - 0; Bacteria - 0; Metazoa - 0; Fungi - 3; Plants - 106; Viruses - 0; Other Eukaryotes - 0 (source: NCBI BLink).	-0.800108	NS	NS	NS	NS	NS	NS	NS	NS	NS
AT4G29780	AT4G29780	unknown protein; BEST Arabidopsis thaliana protein match is: unknown protein (TAIR:AT5G12010.1); Has 945 Blast hits to 944 proteins in 87 species: Archae - 0; Bacteria - 0; Metazoa - 519; Fungi - 43; Plants - 365; Viruses - 0; Other Eukaryotes - 18 (source: NCBI BLink).	-2.14798	NS	NS	NS	-0.842789	NS	NS	NS	NS	NS
TIP	AT5G24590	TCV-interacting protein (TIP); CONTAINS InterPro DOMAIN/s: No apical meristem (NAM) protein (InterPro:IPR003441); BEST Arabidopsis thaliana protein match is: NAC domain containing protein 62 (TAIR:AT3G49530.1); Has 2952 Blast hits to 2945 proteins in 75 species: Archae - 0; Bacteria - 0; Metazoa - 0; Fungi - 0; Plants - 2952; Viruses - 0; Other Eukaryotes - 0 (source: NCBI BLink).	-0.651395	NS	NS	NS	NS	NS	NS	NS	NS	0.449922
AT5G66650	AT5G66650	Protein of unknown function (DUF607); CONTAINS InterPro DOMAIN/s: Protein of unknown function DUF607 (InterPro:IPR006769); BEST Arabidopsis thaliana protein match is: Protein of unknown function (DUF607) (TAIR:AT2G23790.1); Has 1807 Blast hits to 1807 proteins in 277 species: Archae - 0; Bacteria - 0; Metazoa - 736; Fungi - 347; Plants - 385; Viruses - 0; Other Eukaryotes - 339 (source: NCBI BLin…	-0.7945	NS	NS	NS	NS	NS	0.704774	NS	NS	NS
AT5G18450 target
ATAF1	AT1G01720	ATAF1; CONTAINS InterPro DOMAIN/s: No apical meristem (NAM) protein (InterPro:IPR003441); BEST Arabidopsis thaliana protein match is: NAC domain containing protein 32 (TAIR:AT1G77450.1); Has 3043 Blast hits to 3037 proteins in 75 species: Archae - 0; Bacteria - 0; Metazoa - 0; Fungi - 0; Plants - 3043; Viruses - 0; Other Eukaryotes - 0 (source: NCBI BLink).	-0.411378	NS	NS	NS	NS	NS	NS	NS	NS	NS
AT1G07135	AT1G07135	glycine-rich protein; Has 22251 Blast hits to 8348 proteins in 789 species: Archae - 21; Bacteria - 7328; Metazoa - 6126; Fungi - 1280; Plants - 3980; Viruses - 524; Other Eukaryotes - 2992 (source: NCBI BLink).	-1.81186	NS	NS	NS	NS	NS	NS	NS	NS	NS
SRC2	AT1G09070	soybean gene regulated by cold-2 (SRC2); CONTAINS InterPro DOMAIN/s: C2 calcium/lipid-binding domain, CaLB (InterPro:IPR008973), C2 calcium-dependent membrane targeting (InterPro:IPR000008); BEST Arabidopsis thaliana protein match is: Calcium-dependent lipid-binding (CaLB domain) family protein (TAIR:AT3G16510.1); Has 25146 Blast hits to 15856 proteins in 1076 species: Archae - 6; Bacteria - 3010…	-0.916716	NS	NS	NS	NS	NS	NS	NS	NS	0.581027
PME1	AT1G53840	pectin methylesterase 1 (PME1); FUNCTIONS IN: pectinesterase activity; INVOLVED IN: cell wall modification; LOCATED IN: extracellular region, plasma membrane, membrane, plant-type cell wall; EXPRESSED IN: 24 plant structures; EXPRESSED DURING: 13 growth stages; CONTAINS InterPro DOMAIN/s: Pectinesterase, active site (InterPro:IPR018040), Pectin lyase fold/virulence factor (InterPro:IPR011050), Pe…	-0.498534	NS	NS	NS	NS	NS	NS	NS	NS	NS
HSPRO2	AT2G40000	ortholog of sugar beet HS1 PRO-1 2 (HSPRO2); CONTAINS InterPro DOMAIN/s: Hs1pro-1, C-terminal (InterPro:IPR009743), Hs1pro-1, N-terminal (InterPro:IPR009869); BEST Arabidopsis thaliana protein match is: Hs1pro-1 protein (TAIR:AT3G55840.1); Has 71 Blast hits to 71 proteins in 18 species: Archae - 0; Bacteria - 0; Metazoa - 0; Fungi - 0; Plants - 60; Viruses - 0; Other Eukaryotes - 11 (source: NCBI…	-0.906802	NS	NS	NS	NS	NS	0.77457	NS	NS	1.16558
ERF4	AT3G15210	ethylene responsive element binding factor 4 (ERF4); CONTAINS InterPro DOMAIN/s: DNA-binding, integrase-type (InterPro:IPR016177), Pathogenesis-related transcriptional factor/ERF, DNA-binding (InterPro:IPR001471); BEST Arabidopsis thaliana protein match is: ethylene response factor 8 (TAIR:AT1G53170.1); Has 6170 Blast hits to 5786 proteins in 253 species: Archae - 0; Bacteria - 0; Metazoa - 0; Fu…	-0.589249	NS	NS	NS	NS	NS	NS	NS	NS	NS
PAD4	AT3G52430	PHYTOALEXIN DEFICIENT 4 (PAD4); CONTAINS InterPro DOMAIN/s: Lipase, class 3 (InterPro:IPR002921); BEST Arabidopsis thaliana protein match is: senescence-associated gene 101 (TAIR:AT5G14930.2); Has 722 Blast hits to 622 proteins in 73 species: Archae - 0; Bacteria - 23; Metazoa - 17; Fungi - 11; Plants - 620; Viruses - 1; Other Eukaryotes - 50 (source: NCBI BLink).	-0.554693	NS	NS	NS	NS	NS	NS	NS	NS	NS
AT4G29780	AT4G29780	unknown protein; BEST Arabidopsis thaliana protein match is: unknown protein (TAIR:AT5G12010.1); Has 945 Blast hits to 944 proteins in 87 species: Archae - 0; Bacteria - 0; Metazoa - 519; Fungi - 43; Plants - 365; Viruses - 0; Other Eukaryotes - 18 (source: NCBI BLink).	-2.14798	NS	NS	NS	-0.842789	NS	NS	NS	NS	NS
GAE1	AT4G30440	UDP-D-glucuronate 4-epimerase 1 (GAE1); FUNCTIONS IN: UDP-glucuronate 4-epimerase activity, catalytic activity; INVOLVED IN: cellular metabolic process, carbohydrate metabolic process, nucleotide-sugar metabolic process, metabolic process; LOCATED IN: cellular_component unknown; EXPRESSED IN: 24 plant structures; EXPRESSED DURING: 15 growth stages; CONTAINS InterPro DOMAIN/s: NAD-dependent epimer…	-0.572339	NS	NS	NS	NS	NS	NS	NS	NS	NS
AT5G42050	AT5G42050	DCD (Development and Cell Death) domain protein; CONTAINS InterPro DOMAIN/s: Development/cell death domain (InterPro:IPR013989), Kelch related (InterPro:IPR013089); BEST Arabidopsis thaliana protein match is: DCD (Development and Cell Death) domain protein (TAIR:AT3G27090.1); Has 30201 Blast hits to 17322 proteins in 780 species: Archae - 12; Bacteria - 1396; Metazoa - 17338; Fungi - 3422; Plants…	-0.555228	NS	NS	NS	NS	NS	NS	NS	NS	NS
ESE3 target
ATAF1	AT1G01720	ATAF1; CONTAINS InterPro DOMAIN/s: No apical meristem (NAM) protein (InterPro:IPR003441); BEST Arabidopsis thaliana protein match is: NAC domain containing protein 32 (TAIR:AT1G77450.1); Has 3043 Blast hits to 3037 proteins in 75 species: Archae - 0; Bacteria - 0; Metazoa - 0; Fungi - 0; Plants - 3043; Viruses - 0; Other Eukaryotes - 0 (source: NCBI BLink).	-0.411378	NS	NS	NS	NS	NS	NS	NS	NS	NS
AT1G07135	AT1G07135	glycine-rich protein; Has 22251 Blast hits to 8348 proteins in 789 species: Archae - 21; Bacteria - 7328; Metazoa - 6126; Fungi - 1280; Plants - 3980; Viruses - 524; Other Eukaryotes - 2992 (source: NCBI BLink).	-1.81186	NS	NS	NS	NS	NS	NS	NS	NS	NS
SRC2	AT1G09070	soybean gene regulated by cold-2 (SRC2); CONTAINS InterPro DOMAIN/s: C2 calcium/lipid-binding domain, CaLB (InterPro:IPR008973), C2 calcium-dependent membrane targeting (InterPro:IPR000008); BEST Arabidopsis thaliana protein match is: Calcium-dependent lipid-binding (CaLB domain) family protein (TAIR:AT3G16510.1); Has 25146 Blast hits to 15856 proteins in 1076 species: Archae - 6; Bacteria - 3010…	-0.916716	NS	NS	NS	NS	NS	NS	NS	NS	0.581027
AUF2	AT1G22220	F-box family protein; CONTAINS InterPro DOMAIN/s: F-box domain, cyclin-like (InterPro:IPR001810); BEST Arabidopsis thaliana protein match is: F-box family protein (TAIR:AT1G78100.1); Has 155 Blast hits to 154 proteins in 12 species: Archae - 0; Bacteria - 0; Metazoa - 0; Fungi - 0; Plants - 155; Viruses - 0; Other Eukaryotes - 0 (source: NCBI BLink).	-0.418107	NS	NS	NS	NS	NS	NS	NS	NS	NS
RAV2	AT1G68840	related to ABI3/VP1 2 (RAV2); FUNCTIONS IN: transcription repressor activity, DNA binding, sequence-specific DNA binding transcription factor activity; INVOLVED IN: regulation of transcription, DNA-dependent; LOCATED IN: chloroplast; EXPRESSED IN: 12 plant structures; EXPRESSED DURING: 8 growth stages; CONTAINS InterPro DOMAIN/s: DNA-binding, integrase-type (InterPro:IPR016177), Transcriptional f…	-0.752919	NS	NS	-0.875153	NS	NS	1.29488	NS	0.736484	1.31852
UCP5	AT2G22500	uncoupling protein 5 (UCP5); FUNCTIONS IN: binding, dicarboxylic acid transmembrane transporter activity; INVOLVED IN: transport, mitochondrial transport; LOCATED IN: mitochondrion, mitochondrial inner membrane, membrane; EXPRESSED IN: 23 plant structures; EXPRESSED DURING: 15 growth stages; CONTAINS InterPro DOMAIN/s: Mitochondrial substrate carrier (InterPro:IPR001993), Mitochondrial brown fat …	-0.692409	NS	NS	NS	NS	NS	NS	NS	NS	0.39847
AT2G36220	AT2G36220	unknown protein; BEST Arabidopsis thaliana protein match is: unknown protein (TAIR:AT3G52710.1); Has 74 Blast hits to 74 proteins in 10 species: Archae - 0; Bacteria - 0; Metazoa - 0; Fungi - 0; Plants - 74; Viruses - 0; Other Eukaryotes - 0 (source: NCBI BLink).	-1.04098	NS	NS	NS	-0.585502	NS	0.469952	NS	NS	0.791781
HSPRO2	AT2G40000	ortholog of sugar beet HS1 PRO-1 2 (HSPRO2); CONTAINS InterPro DOMAIN/s: Hs1pro-1, C-terminal (InterPro:IPR009743), Hs1pro-1, N-terminal (InterPro:IPR009869); BEST Arabidopsis thaliana protein match is: Hs1pro-1 protein (TAIR:AT3G55840.1); Has 71 Blast hits to 71 proteins in 18 species: Archae - 0; Bacteria - 0; Metazoa - 0; Fungi - 0; Plants - 60; Viruses - 0; Other Eukaryotes - 11 (source: NCBI…	-0.906802	NS	NS	NS	NS	NS	0.77457	NS	NS	1.16558
CAMBP25	AT2G41010	calmodulin (CAM)-binding protein of 25 kDa (CAMBP25); CONTAINS InterPro DOMAIN/s: VQ (InterPro:IPR008889); BEST Arabidopsis thaliana protein match is: VQ motif-containing protein (TAIR:AT3G56880.1); Has 142 Blast hits to 142 proteins in 12 species: Archae - 0; Bacteria - 0; Metazoa - 0; Fungi - 0; Plants - 142; Viruses - 0; Other Eukaryotes - 0 (source: NCBI BLink).	-0.801834	NS	NS	NS	NS	NS	NS	NS	NS	NS
ERF4	AT3G15210	ethylene responsive element binding factor 4 (ERF4); CONTAINS InterPro DOMAIN/s: DNA-binding, integrase-type (InterPro:IPR016177), Pathogenesis-related transcriptional factor/ERF, DNA-binding (InterPro:IPR001471); BEST Arabidopsis thaliana protein match is: ethylene response factor 8 (TAIR:AT1G53170.1); Has 6170 Blast hits to 5786 proteins in 253 species: Archae - 0; Bacteria - 0; Metazoa - 0; Fu…	-0.589249	NS	NS	NS	NS	NS	NS	NS	NS	NS
AGC2-1	AT3G25250	AGC2-1; FUNCTIONS IN: kinase activity; INVOLVED IN: protein amino acid phosphorylation; LOCATED IN: cellular_component unknown; EXPRESSED IN: hypocotyl, root, stamen, pollen tube; EXPRESSED DURING: 4 anthesis, petal differentiation and expansion stage; CONTAINS InterPro DOMAIN/s: Protein kinase, catalytic domain (InterPro:IPR000719), Serine/threonine-protein kinase domain (InterPro:IPR002290), Se…	-0.86217	NS	NS	NS	NS	NS	NS	NS	NS	NS
PAD4	AT3G52430	PHYTOALEXIN DEFICIENT 4 (PAD4); CONTAINS InterPro DOMAIN/s: Lipase, class 3 (InterPro:IPR002921); BEST Arabidopsis thaliana protein match is: senescence-associated gene 101 (TAIR:AT5G14930.2); Has 722 Blast hits to 622 proteins in 73 species: Archae - 0; Bacteria - 23; Metazoa - 17; Fungi - 11; Plants - 620; Viruses - 1; Other Eukaryotes - 50 (source: NCBI BLink).	-0.554693	NS	NS	NS	NS	NS	NS	NS	NS	NS
AT3G52800	AT3G52800	A20/AN1-like zinc finger family protein; FUNCTIONS IN: DNA binding, zinc ion binding; INVOLVED IN: response to chitin; LOCATED IN: cellular_component unknown; EXPRESSED IN: 23 plant structures; EXPRESSED DURING: 15 growth stages; CONTAINS InterPro DOMAIN/s: Zinc finger, AN1-type (InterPro:IPR000058), Zinc finger, A20-type (InterPro:IPR002653); BEST Arabidopsis thaliana protein match is: A20/AN1-l…	-0.763864	NS	NS	NS	NS	NS	0.705728	NS	NS	0.662341
AT3G56880	AT3G56880	VQ motif-containing protein; CONTAINS InterPro DOMAIN/s: VQ (InterPro:IPR008889); BEST Arabidopsis thaliana protein match is: calmodulin (CAM)-binding protein of 25 kDa (TAIR:AT2G41010.1); Has 109 Blast hits to 109 proteins in 12 species: Archae - 0; Bacteria - 0; Metazoa - 0; Fungi - 3; Plants - 106; Viruses - 0; Other Eukaryotes - 0 (source: NCBI BLink).	-0.800108	NS	NS	NS	NS	NS	NS	NS	NS	NS
AT4G29780	AT4G29780	unknown protein; BEST Arabidopsis thaliana protein match is: unknown protein (TAIR:AT5G12010.1); Has 945 Blast hits to 944 proteins in 87 species: Archae - 0; Bacteria - 0; Metazoa - 519; Fungi - 43; Plants - 365; Viruses - 0; Other Eukaryotes - 18 (source: NCBI BLink).	-2.14798	NS	NS	NS	-0.842789	NS	NS	NS	NS	NS
GAE1	AT4G30440	UDP-D-glucuronate 4-epimerase 1 (GAE1); FUNCTIONS IN: UDP-glucuronate 4-epimerase activity, catalytic activity; INVOLVED IN: cellular metabolic process, carbohydrate metabolic process, nucleotide-sugar metabolic process, metabolic process; LOCATED IN: cellular_component unknown; EXPRESSED IN: 24 plant structures; EXPRESSED DURING: 15 growth stages; CONTAINS InterPro DOMAIN/s: NAD-dependent epimer…	-0.572339	NS	NS	NS	NS	NS	NS	NS	NS	NS
AT5G42050	AT5G42050	DCD (Development and Cell Death) domain protein; CONTAINS InterPro DOMAIN/s: Development/cell death domain (InterPro:IPR013989), Kelch related (InterPro:IPR013089); BEST Arabidopsis thaliana protein match is: DCD (Development and Cell Death) domain protein (TAIR:AT3G27090.1); Has 30201 Blast hits to 17322 proteins in 780 species: Archae - 12; Bacteria - 1396; Metazoa - 17338; Fungi - 3422; Plants…	-0.555228	NS	NS	NS	NS	NS	NS	NS	NS	NS
AT5G66650	AT5G66650	Protein of unknown function (DUF607); CONTAINS InterPro DOMAIN/s: Protein of unknown function DUF607 (InterPro:IPR006769); BEST Arabidopsis thaliana protein match is: Protein of unknown function (DUF607) (TAIR:AT2G23790.1); Has 1807 Blast hits to 1807 proteins in 277 species: Archae - 0; Bacteria - 0; Metazoa - 736; Fungi - 347; Plants - 385; Viruses - 0; Other Eukaryotes - 339 (source: NCBI BLin…	-0.7945	NS	NS	NS	NS	NS	0.704774	NS	NS	NS
AT5G22990 target
ATAF1	AT1G01720	ATAF1; CONTAINS InterPro DOMAIN/s: No apical meristem (NAM) protein (InterPro:IPR003441); BEST Arabidopsis thaliana protein match is: NAC domain containing protein 32 (TAIR:AT1G77450.1); Has 3043 Blast hits to 3037 proteins in 75 species: Archae - 0; Bacteria - 0; Metazoa - 0; Fungi - 0; Plants - 3043; Viruses - 0; Other Eukaryotes - 0 (source: NCBI BLink).	-0.411378	NS	NS	NS	NS	NS	NS	NS	NS	NS
MAPKKK13	AT1G07150	mitogen-activated protein kinase kinase kinase 13 (MAPKKK13); FUNCTIONS IN: protein serine/threonine kinase activity, protein kinase activity, kinase activity, ATP binding; INVOLVED IN: protein amino acid phosphorylation; EXPRESSED IN: 8 plant structures; EXPRESSED DURING: LP.04 four leaves visible, 4 anthesis, LP.10 ten leaves visible, petal differentiation and expansion stage; CONTAINS InterPro…	-0.867993	NS	NS	NS	NS	NS	NS	NS	NS	NS
SRC2	AT1G09070	soybean gene regulated by cold-2 (SRC2); CONTAINS InterPro DOMAIN/s: C2 calcium/lipid-binding domain, CaLB (InterPro:IPR008973), C2 calcium-dependent membrane targeting (InterPro:IPR000008); BEST Arabidopsis thaliana protein match is: Calcium-dependent lipid-binding (CaLB domain) family protein (TAIR:AT3G16510.1); Has 25146 Blast hits to 15856 proteins in 1076 species: Archae - 6; Bacteria - 3010…	-0.916716	NS	NS	NS	NS	NS	NS	NS	NS	0.581027
AUF2	AT1G22220	F-box family protein; CONTAINS InterPro DOMAIN/s: F-box domain, cyclin-like (InterPro:IPR001810); BEST Arabidopsis thaliana protein match is: F-box family protein (TAIR:AT1G78100.1); Has 155 Blast hits to 154 proteins in 12 species: Archae - 0; Bacteria - 0; Metazoa - 0; Fungi - 0; Plants - 155; Viruses - 0; Other Eukaryotes - 0 (source: NCBI BLink).	-0.418107	NS	NS	NS	NS	NS	NS	NS	NS	NS
AT1G23710	AT1G23710	Protein of unknown function (DUF1645); CONTAINS InterPro DOMAIN/s: Protein of unknown function DUF1645 (InterPro:IPR012442); BEST Arabidopsis thaliana protein match is: Protein of unknown function (DUF1645) (TAIR:AT1G70420.1); Has 288 Blast hits to 282 proteins in 52 species: Archae - 0; Bacteria - 6; Metazoa - 16; Fungi - 11; Plants - 191; Viruses - 0; Other Eukaryotes - 64 (source: NCBI BLink).	-0.604273	NS	NS	NS	NS	NS	NS	NS	NS	NS
AT1G50740	AT1G50740	Transmembrane proteins 14C; FUNCTIONS IN: molecular_function unknown; INVOLVED IN: biological_process unknown; LOCATED IN: endomembrane system, membrane; EXPRESSED IN: 23 plant structures; EXPRESSED DURING: 15 growth stages; CONTAINS InterPro DOMAIN/s: Uncharacterised protein family UPF0136, Transmembrane (InterPro:IPR005349); BEST Arabidopsis thaliana protein match is: Transmembrane proteins 14C…	-1.06971	NS	NS	NS	NS	NS	NS	NS	NS	NS
RAV2	AT1G68840	related to ABI3/VP1 2 (RAV2); FUNCTIONS IN: transcription repressor activity, DNA binding, sequence-specific DNA binding transcription factor activity; INVOLVED IN: regulation of transcription, DNA-dependent; LOCATED IN: chloroplast; EXPRESSED IN: 12 plant structures; EXPRESSED DURING: 8 growth stages; CONTAINS InterPro DOMAIN/s: DNA-binding, integrase-type (InterPro:IPR016177), Transcriptional f…	-0.752919	NS	NS	-0.875153	NS	NS	1.29488	NS	0.736484	1.31852
UCP5	AT2G22500	uncoupling protein 5 (UCP5); FUNCTIONS IN: binding, dicarboxylic acid transmembrane transporter activity; INVOLVED IN: transport, mitochondrial transport; LOCATED IN: mitochondrion, mitochondrial inner membrane, membrane; EXPRESSED IN: 23 plant structures; EXPRESSED DURING: 15 growth stages; CONTAINS InterPro DOMAIN/s: Mitochondrial substrate carrier (InterPro:IPR001993), Mitochondrial brown fat …	-0.692409	NS	NS	NS	NS	NS	NS	NS	NS	0.39847
AT2G36220	AT2G36220	unknown protein; BEST Arabidopsis thaliana protein match is: unknown protein (TAIR:AT3G52710.1); Has 74 Blast hits to 74 proteins in 10 species: Archae - 0; Bacteria - 0; Metazoa - 0; Fungi - 0; Plants - 74; Viruses - 0; Other Eukaryotes - 0 (source: NCBI BLink).	-1.04098	NS	NS	NS	-0.585502	NS	0.469952	NS	NS	0.791781
AT2G36580	AT2G36580	Pyruvate kinase family protein; FUNCTIONS IN: pyruvate kinase activity, potassium ion binding, magnesium ion binding, catalytic activity; INVOLVED IN: glycolysis; LOCATED IN: plasma membrane; EXPRESSED IN: guard cell; CONTAINS InterPro DOMAIN/s: Pyruvate/Phosphoenolpyruvate kinase, catalytic core (InterPro:IPR015813), Pyruvate kinase, alpha/beta (InterPro:IPR015794), Pyruvate kinase, beta-barrel-…	-0.380413	-0.654796	-0.756851	NS	-0.743803	NS	NS	NS	NS	NS
AT4G29780	AT4G29780	unknown protein; BEST Arabidopsis thaliana protein match is: unknown protein (TAIR:AT5G12010.1); Has 945 Blast hits to 944 proteins in 87 species: Archae - 0; Bacteria - 0; Metazoa - 519; Fungi - 43; Plants - 365; Viruses - 0; Other Eukaryotes - 18 (source: NCBI BLink).	-2.14798	NS	NS	NS	-0.842789	NS	NS	NS	NS	NS
GAE1	AT4G30440	UDP-D-glucuronate 4-epimerase 1 (GAE1); FUNCTIONS IN: UDP-glucuronate 4-epimerase activity, catalytic activity; INVOLVED IN: cellular metabolic process, carbohydrate metabolic process, nucleotide-sugar metabolic process, metabolic process; LOCATED IN: cellular_component unknown; EXPRESSED IN: 24 plant structures; EXPRESSED DURING: 15 growth stages; CONTAINS InterPro DOMAIN/s: NAD-dependent epimer…	-0.572339	NS	NS	NS	NS	NS	NS	NS	NS	NS
GILP	AT5G13190	CONTAINS InterPro DOMAIN/s: LPS-induced tumor necrosis factor alpha factor (InterPro:IPR006629); Has 30201 Blast hits to 17322 proteins in 780 species: Archae - 12; Bacteria - 1396; Metazoa - 17338; Fungi - 3422; Plants - 5037; Viruses - 0; Other Eukaryotes - 2996 (source: NCBI BLink).	-0.687911	NS	NS	NS	NS	NS	NS	NS	NS	0.392402
TIP	AT5G24590	TCV-interacting protein (TIP); CONTAINS InterPro DOMAIN/s: No apical meristem (NAM) protein (InterPro:IPR003441); BEST Arabidopsis thaliana protein match is: NAC domain containing protein 62 (TAIR:AT3G49530.1); Has 2952 Blast hits to 2945 proteins in 75 species: Archae - 0; Bacteria - 0; Metazoa - 0; Fungi - 0; Plants - 2952; Viruses - 0; Other Eukaryotes - 0 (source: NCBI BLink).	-0.651395	NS	NS	NS	NS	NS	NS	NS	NS	0.449922
AT5G42050	AT5G42050	DCD (Development and Cell Death) domain protein; CONTAINS InterPro DOMAIN/s: Development/cell death domain (InterPro:IPR013989), Kelch related (InterPro:IPR013089); BEST Arabidopsis thaliana protein match is: DCD (Development and Cell Death) domain protein (TAIR:AT3G27090.1); Has 30201 Blast hits to 17322 proteins in 780 species: Archae - 12; Bacteria - 1396; Metazoa - 17338; Fungi - 3422; Plants…	-0.555228	NS	NS	NS	NS	NS	NS	NS	NS	NS
AT5G66650	AT5G66650	Protein of unknown function (DUF607); CONTAINS InterPro DOMAIN/s: Protein of unknown function DUF607 (InterPro:IPR006769); BEST Arabidopsis thaliana protein match is: Protein of unknown function (DUF607) (TAIR:AT2G23790.1); Has 1807 Blast hits to 1807 proteins in 277 species: Archae - 0; Bacteria - 0; Metazoa - 736; Fungi - 347; Plants - 385; Viruses - 0; Other Eukaryotes - 339 (source: NCBI BLin…	-0.7945	NS	NS	NS	NS	NS	0.704774	NS	NS	NS
AREB3 target
ATAF1	AT1G01720	ATAF1; CONTAINS InterPro DOMAIN/s: No apical meristem (NAM) protein (InterPro:IPR003441); BEST Arabidopsis thaliana protein match is: NAC domain containing protein 32 (TAIR:AT1G77450.1); Has 3043 Blast hits to 3037 proteins in 75 species: Archae - 0; Bacteria - 0; Metazoa - 0; Fungi - 0; Plants - 3043; Viruses - 0; Other Eukaryotes - 0 (source: NCBI BLink).	-0.411378	NS	NS	NS	NS	NS	NS	NS	NS	NS
MAPKKK13	AT1G07150	mitogen-activated protein kinase kinase kinase 13 (MAPKKK13); FUNCTIONS IN: protein serine/threonine kinase activity, protein kinase activity, kinase activity, ATP binding; INVOLVED IN: protein amino acid phosphorylation; EXPRESSED IN: 8 plant structures; EXPRESSED DURING: LP.04 four leaves visible, 4 anthesis, LP.10 ten leaves visible, petal differentiation and expansion stage; CONTAINS InterPro…	-0.867993	NS	NS	NS	NS	NS	NS	NS	NS	NS
AT1G23710	AT1G23710	Protein of unknown function (DUF1645); CONTAINS InterPro DOMAIN/s: Protein of unknown function DUF1645 (InterPro:IPR012442); BEST Arabidopsis thaliana protein match is: Protein of unknown function (DUF1645) (TAIR:AT1G70420.1); Has 288 Blast hits to 282 proteins in 52 species: Archae - 0; Bacteria - 6; Metazoa - 16; Fungi - 11; Plants - 191; Viruses - 0; Other Eukaryotes - 64 (source: NCBI BLink).	-0.604273	NS	NS	NS	NS	NS	NS	NS	NS	NS
UCP5	AT2G22500	uncoupling protein 5 (UCP5); FUNCTIONS IN: binding, dicarboxylic acid transmembrane transporter activity; INVOLVED IN: transport, mitochondrial transport; LOCATED IN: mitochondrion, mitochondrial inner membrane, membrane; EXPRESSED IN: 23 plant structures; EXPRESSED DURING: 15 growth stages; CONTAINS InterPro DOMAIN/s: Mitochondrial substrate carrier (InterPro:IPR001993), Mitochondrial brown fat …	-0.692409	NS	NS	NS	NS	NS	NS	NS	NS	0.39847
AT2G36220	AT2G36220	unknown protein; BEST Arabidopsis thaliana protein match is: unknown protein (TAIR:AT3G52710.1); Has 74 Blast hits to 74 proteins in 10 species: Archae - 0; Bacteria - 0; Metazoa - 0; Fungi - 0; Plants - 74; Viruses - 0; Other Eukaryotes - 0 (source: NCBI BLink).	-1.04098	NS	NS	NS	-0.585502	NS	0.469952	NS	NS	0.791781
CZF1	AT2G40140	CZF1; CONTAINS InterPro DOMAIN/s: Zinc finger, CCCH-type (InterPro:IPR000571), Ankyrin repeat-containing domain (InterPro:IPR020683), Ankyrin repeat (InterPro:IPR002110); BEST Arabidopsis thaliana protein match is: salt-inducible zinc finger 1 (TAIR:AT3G55980.1); Has 1196 Blast hits to 1143 proteins in 183 species: Archae - 4; Bacteria - 47; Metazoa - 401; Fungi - 61; Plants - 441; Viruses - 2; O…	-0.769874	NS	NS	NS	NS	NS	NS	NS	NS	NS
CAMBP25	AT2G41010	calmodulin (CAM)-binding protein of 25 kDa (CAMBP25); CONTAINS InterPro DOMAIN/s: VQ (InterPro:IPR008889); BEST Arabidopsis thaliana protein match is: VQ motif-containing protein (TAIR:AT3G56880.1); Has 142 Blast hits to 142 proteins in 12 species: Archae - 0; Bacteria - 0; Metazoa - 0; Fungi - 0; Plants - 142; Viruses - 0; Other Eukaryotes - 0 (source: NCBI BLink).	-0.801834	NS	NS	NS	NS	NS	NS	NS	NS	NS
ERF4	AT3G15210	ethylene responsive element binding factor 4 (ERF4); CONTAINS InterPro DOMAIN/s: DNA-binding, integrase-type (InterPro:IPR016177), Pathogenesis-related transcriptional factor/ERF, DNA-binding (InterPro:IPR001471); BEST Arabidopsis thaliana protein match is: ethylene response factor 8 (TAIR:AT1G53170.1); Has 6170 Blast hits to 5786 proteins in 253 species: Archae - 0; Bacteria - 0; Metazoa - 0; Fu…	-0.589249	NS	NS	NS	NS	NS	NS	NS	NS	NS
PAD4	AT3G52430	PHYTOALEXIN DEFICIENT 4 (PAD4); CONTAINS InterPro DOMAIN/s: Lipase, class 3 (InterPro:IPR002921); BEST Arabidopsis thaliana protein match is: senescence-associated gene 101 (TAIR:AT5G14930.2); Has 722 Blast hits to 622 proteins in 73 species: Archae - 0; Bacteria - 23; Metazoa - 17; Fungi - 11; Plants - 620; Viruses - 1; Other Eukaryotes - 50 (source: NCBI BLink).	-0.554693	NS	NS	NS	NS	NS	NS	NS	NS	NS
AT3G52800	AT3G52800	A20/AN1-like zinc finger family protein; FUNCTIONS IN: DNA binding, zinc ion binding; INVOLVED IN: response to chitin; LOCATED IN: cellular_component unknown; EXPRESSED IN: 23 plant structures; EXPRESSED DURING: 15 growth stages; CONTAINS InterPro DOMAIN/s: Zinc finger, AN1-type (InterPro:IPR000058), Zinc finger, A20-type (InterPro:IPR002653); BEST Arabidopsis thaliana protein match is: A20/AN1-l…	-0.763864	NS	NS	NS	NS	NS	0.705728	NS	NS	0.662341
AT4G29780	AT4G29780	unknown protein; BEST Arabidopsis thaliana protein match is: unknown protein (TAIR:AT5G12010.1); Has 945 Blast hits to 944 proteins in 87 species: Archae - 0; Bacteria - 0; Metazoa - 519; Fungi - 43; Plants - 365; Viruses - 0; Other Eukaryotes - 18 (source: NCBI BLink).	-2.14798	NS	NS	NS	-0.842789	NS	NS	NS	NS	NS
GAE1	AT4G30440	UDP-D-glucuronate 4-epimerase 1 (GAE1); FUNCTIONS IN: UDP-glucuronate 4-epimerase activity, catalytic activity; INVOLVED IN: cellular metabolic process, carbohydrate metabolic process, nucleotide-sugar metabolic process, metabolic process; LOCATED IN: cellular_component unknown; EXPRESSED IN: 24 plant structures; EXPRESSED DURING: 15 growth stages; CONTAINS InterPro DOMAIN/s: NAD-dependent epimer…	-0.572339	NS	NS	NS	NS	NS	NS	NS	NS	NS
AT5G42050	AT5G42050	DCD (Development and Cell Death) domain protein; CONTAINS InterPro DOMAIN/s: Development/cell death domain (InterPro:IPR013989), Kelch related (InterPro:IPR013089); BEST Arabidopsis thaliana protein match is: DCD (Development and Cell Death) domain protein (TAIR:AT3G27090.1); Has 30201 Blast hits to 17322 proteins in 780 species: Archae - 12; Bacteria - 1396; Metazoa - 17338; Fungi - 3422; Plants…	-0.555228	NS	NS	NS	NS	NS	NS	NS	NS	NS
AT5G66650	AT5G66650	Protein of unknown function (DUF607); CONTAINS InterPro DOMAIN/s: Protein of unknown function DUF607 (InterPro:IPR006769); BEST Arabidopsis thaliana protein match is: Protein of unknown function (DUF607) (TAIR:AT2G23790.1); Has 1807 Blast hits to 1807 proteins in 277 species: Archae - 0; Bacteria - 0; Metazoa - 736; Fungi - 347; Plants - 385; Viruses - 0; Other Eukaryotes - 339 (source: NCBI BLin…	-0.7945	NS	NS	NS	NS	NS	0.704774	NS	NS	NS
CBF3 target
ATAF1	AT1G01720	ATAF1; CONTAINS InterPro DOMAIN/s: No apical meristem (NAM) protein (InterPro:IPR003441); BEST Arabidopsis thaliana protein match is: NAC domain containing protein 32 (TAIR:AT1G77450.1); Has 3043 Blast hits to 3037 proteins in 75 species: Archae - 0; Bacteria - 0; Metazoa - 0; Fungi - 0; Plants - 3043; Viruses - 0; Other Eukaryotes - 0 (source: NCBI BLink).	-0.411378	NS	NS	NS	NS	NS	NS	NS	NS	NS
SRC2	AT1G09070	soybean gene regulated by cold-2 (SRC2); CONTAINS InterPro DOMAIN/s: C2 calcium/lipid-binding domain, CaLB (InterPro:IPR008973), C2 calcium-dependent membrane targeting (InterPro:IPR000008); BEST Arabidopsis thaliana protein match is: Calcium-dependent lipid-binding (CaLB domain) family protein (TAIR:AT3G16510.1); Has 25146 Blast hits to 15856 proteins in 1076 species: Archae - 6; Bacteria - 3010…	-0.916716	NS	NS	NS	NS	NS	NS	NS	NS	0.581027
AUF2	AT1G22220	F-box family protein; CONTAINS InterPro DOMAIN/s: F-box domain, cyclin-like (InterPro:IPR001810); BEST Arabidopsis thaliana protein match is: F-box family protein (TAIR:AT1G78100.1); Has 155 Blast hits to 154 proteins in 12 species: Archae - 0; Bacteria - 0; Metazoa - 0; Fungi - 0; Plants - 155; Viruses - 0; Other Eukaryotes - 0 (source: NCBI BLink).	-0.418107	NS	NS	NS	NS	NS	NS	NS	NS	NS
RAV2	AT1G68840	related to ABI3/VP1 2 (RAV2); FUNCTIONS IN: transcription repressor activity, DNA binding, sequence-specific DNA binding transcription factor activity; INVOLVED IN: regulation of transcription, DNA-dependent; LOCATED IN: chloroplast; EXPRESSED IN: 12 plant structures; EXPRESSED DURING: 8 growth stages; CONTAINS InterPro DOMAIN/s: DNA-binding, integrase-type (InterPro:IPR016177), Transcriptional f…	-0.752919	NS	NS	-0.875153	NS	NS	1.29488	NS	0.736484	1.31852
RHA2B	AT2G01150	RING-H2 finger protein 2B (RHA2B); CONTAINS InterPro DOMAIN/s: Zinc finger, RING-type (InterPro:IPR001841), Zinc finger, C3HC4 RING-type (InterPro:IPR018957); BEST Arabidopsis thaliana protein match is: RING-H2 finger A2A (TAIR:AT1G15100.1); Has 8536 Blast hits to 8514 proteins in 269 species: Archae - 0; Bacteria - 0; Metazoa - 2151; Fungi - 713; Plants - 4534; Viruses - 16; Other Eukaryotes - 1…	-0.987027	NS	NS	NS	NS	NS	NS	NS	NS	NS
AT2G36220	AT2G36220	unknown protein; BEST Arabidopsis thaliana protein match is: unknown protein (TAIR:AT3G52710.1); Has 74 Blast hits to 74 proteins in 10 species: Archae - 0; Bacteria - 0; Metazoa - 0; Fungi - 0; Plants - 74; Viruses - 0; Other Eukaryotes - 0 (source: NCBI BLink).	-1.04098	NS	NS	NS	-0.585502	NS	0.469952	NS	NS	0.791781
HSPRO2	AT2G40000	ortholog of sugar beet HS1 PRO-1 2 (HSPRO2); CONTAINS InterPro DOMAIN/s: Hs1pro-1, C-terminal (InterPro:IPR009743), Hs1pro-1, N-terminal (InterPro:IPR009869); BEST Arabidopsis thaliana protein match is: Hs1pro-1 protein (TAIR:AT3G55840.1); Has 71 Blast hits to 71 proteins in 18 species: Archae - 0; Bacteria - 0; Metazoa - 0; Fungi - 0; Plants - 60; Viruses - 0; Other Eukaryotes - 11 (source: NCBI…	-0.906802	NS	NS	NS	NS	NS	0.77457	NS	NS	1.16558
ERF4	AT3G15210	ethylene responsive element binding factor 4 (ERF4); CONTAINS InterPro DOMAIN/s: DNA-binding, integrase-type (InterPro:IPR016177), Pathogenesis-related transcriptional factor/ERF, DNA-binding (InterPro:IPR001471); BEST Arabidopsis thaliana protein match is: ethylene response factor 8 (TAIR:AT1G53170.1); Has 6170 Blast hits to 5786 proteins in 253 species: Archae - 0; Bacteria - 0; Metazoa - 0; Fu…	-0.589249	NS	NS	NS	NS	NS	NS	NS	NS	NS
AT3G52800	AT3G52800	A20/AN1-like zinc finger family protein; FUNCTIONS IN: DNA binding, zinc ion binding; INVOLVED IN: response to chitin; LOCATED IN: cellular_component unknown; EXPRESSED IN: 23 plant structures; EXPRESSED DURING: 15 growth stages; CONTAINS InterPro DOMAIN/s: Zinc finger, AN1-type (InterPro:IPR000058), Zinc finger, A20-type (InterPro:IPR002653); BEST Arabidopsis thaliana protein match is: A20/AN1-l…	-0.763864	NS	NS	NS	NS	NS	0.705728	NS	NS	0.662341
SZF1	AT3G55980	salt-inducible zinc finger 1 (SZF1); CONTAINS InterPro DOMAIN/s: Zinc finger, CCCH-type (InterPro:IPR000571), Ankyrin repeat-containing domain (InterPro:IPR020683), Ankyrin repeat (InterPro:IPR002110); BEST Arabidopsis thaliana protein match is: zinc finger (CCCH-type) family protein (TAIR:AT2G40140.2); Has 1623 Blast hits to 1414 proteins in 181 species: Archae - 2; Bacteria - 49; Metazoa - 777;…	-1.24553	NS	NS	NS	NS	NS	NS	NS	NS	NS
AT4G29780	AT4G29780	unknown protein; BEST Arabidopsis thaliana protein match is: unknown protein (TAIR:AT5G12010.1); Has 945 Blast hits to 944 proteins in 87 species: Archae - 0; Bacteria - 0; Metazoa - 519; Fungi - 43; Plants - 365; Viruses - 0; Other Eukaryotes - 18 (source: NCBI BLink).	-2.14798	NS	NS	NS	-0.842789	NS	NS	NS	NS	NS
TIP	AT5G24590	TCV-interacting protein (TIP); CONTAINS InterPro DOMAIN/s: No apical meristem (NAM) protein (InterPro:IPR003441); BEST Arabidopsis thaliana protein match is: NAC domain containing protein 62 (TAIR:AT3G49530.1); Has 2952 Blast hits to 2945 proteins in 75 species: Archae - 0; Bacteria - 0; Metazoa - 0; Fungi - 0; Plants - 2952; Viruses - 0; Other Eukaryotes - 0 (source: NCBI BLink).	-0.651395	NS	NS	NS	NS	NS	NS	NS	NS	0.449922
AT5G42050	AT5G42050	DCD (Development and Cell Death) domain protein; CONTAINS InterPro DOMAIN/s: Development/cell death domain (InterPro:IPR013989), Kelch related (InterPro:IPR013089); BEST Arabidopsis thaliana protein match is: DCD (Development and Cell Death) domain protein (TAIR:AT3G27090.1); Has 30201 Blast hits to 17322 proteins in 780 species: Archae - 12; Bacteria - 1396; Metazoa - 17338; Fungi - 3422; Plants…	-0.555228	NS	NS	NS	NS	NS	NS	NS	NS	NS
AT5G66650	AT5G66650	Protein of unknown function (DUF607); CONTAINS InterPro DOMAIN/s: Protein of unknown function DUF607 (InterPro:IPR006769); BEST Arabidopsis thaliana protein match is: Protein of unknown function (DUF607) (TAIR:AT2G23790.1); Has 1807 Blast hits to 1807 proteins in 277 species: Archae - 0; Bacteria - 0; Metazoa - 736; Fungi - 347; Plants - 385; Viruses - 0; Other Eukaryotes - 339 (source: NCBI BLin…	-0.7945	NS	NS	NS	NS	NS	0.704774	NS	NS	NS
ERF38 target
SRC2	AT1G09070	soybean gene regulated by cold-2 (SRC2); CONTAINS InterPro DOMAIN/s: C2 calcium/lipid-binding domain, CaLB (InterPro:IPR008973), C2 calcium-dependent membrane targeting (InterPro:IPR000008); BEST Arabidopsis thaliana protein match is: Calcium-dependent lipid-binding (CaLB domain) family protein (TAIR:AT3G16510.1); Has 25146 Blast hits to 15856 proteins in 1076 species: Archae - 6; Bacteria - 3010…	-0.916716	NS	NS	NS	NS	NS	NS	NS	NS	0.581027
AT1G23710	AT1G23710	Protein of unknown function (DUF1645); CONTAINS InterPro DOMAIN/s: Protein of unknown function DUF1645 (InterPro:IPR012442); BEST Arabidopsis thaliana protein match is: Protein of unknown function (DUF1645) (TAIR:AT1G70420.1); Has 288 Blast hits to 282 proteins in 52 species: Archae - 0; Bacteria - 6; Metazoa - 16; Fungi - 11; Plants - 191; Viruses - 0; Other Eukaryotes - 64 (source: NCBI BLink).	-0.604273	NS	NS	NS	NS	NS	NS	NS	NS	NS
OPR1	AT1G76680	12-oxophytodienoate reductase 1 (OPR1); FUNCTIONS IN: 12-oxophytodienoate reductase activity; INVOLVED IN: in 7 processes; LOCATED IN: cellular_component unknown; EXPRESSED IN: 11 plant structures; EXPRESSED DURING: seedling growth, developing seed stage; CONTAINS InterPro DOMAIN/s: NADH:flavin oxidoreductase/NADH oxidase, N-terminal (InterPro:IPR001155), Aldolase-type TIM barrel (InterPro:IPR013…	-0.408491	NS	NS	-0.569227	NS	NS	NS	NS	NS	NS
UCP5	AT2G22500	uncoupling protein 5 (UCP5); FUNCTIONS IN: binding, dicarboxylic acid transmembrane transporter activity; INVOLVED IN: transport, mitochondrial transport; LOCATED IN: mitochondrion, mitochondrial inner membrane, membrane; EXPRESSED IN: 23 plant structures; EXPRESSED DURING: 15 growth stages; CONTAINS InterPro DOMAIN/s: Mitochondrial substrate carrier (InterPro:IPR001993), Mitochondrial brown fat …	-0.692409	NS	NS	NS	NS	NS	NS	NS	NS	0.39847
AT2G36220	AT2G36220	unknown protein; BEST Arabidopsis thaliana protein match is: unknown protein (TAIR:AT3G52710.1); Has 74 Blast hits to 74 proteins in 10 species: Archae - 0; Bacteria - 0; Metazoa - 0; Fungi - 0; Plants - 74; Viruses - 0; Other Eukaryotes - 0 (source: NCBI BLink).	-1.04098	NS	NS	NS	-0.585502	NS	0.469952	NS	NS	0.791781
AT2G36580	AT2G36580	Pyruvate kinase family protein; FUNCTIONS IN: pyruvate kinase activity, potassium ion binding, magnesium ion binding, catalytic activity; INVOLVED IN: glycolysis; LOCATED IN: plasma membrane; EXPRESSED IN: guard cell; CONTAINS InterPro DOMAIN/s: Pyruvate/Phosphoenolpyruvate kinase, catalytic core (InterPro:IPR015813), Pyruvate kinase, alpha/beta (InterPro:IPR015794), Pyruvate kinase, beta-barrel-…	-0.380413	-0.654796	-0.756851	NS	-0.743803	NS	NS	NS	NS	NS
CAMBP25	AT2G41010	calmodulin (CAM)-binding protein of 25 kDa (CAMBP25); CONTAINS InterPro DOMAIN/s: VQ (InterPro:IPR008889); BEST Arabidopsis thaliana protein match is: VQ motif-containing protein (TAIR:AT3G56880.1); Has 142 Blast hits to 142 proteins in 12 species: Archae - 0; Bacteria - 0; Metazoa - 0; Fungi - 0; Plants - 142; Viruses - 0; Other Eukaryotes - 0 (source: NCBI BLink).	-0.801834	NS	NS	NS	NS	NS	NS	NS	NS	NS
ERF4	AT3G15210	ethylene responsive element binding factor 4 (ERF4); CONTAINS InterPro DOMAIN/s: DNA-binding, integrase-type (InterPro:IPR016177), Pathogenesis-related transcriptional factor/ERF, DNA-binding (InterPro:IPR001471); BEST Arabidopsis thaliana protein match is: ethylene response factor 8 (TAIR:AT1G53170.1); Has 6170 Blast hits to 5786 proteins in 253 species: Archae - 0; Bacteria - 0; Metazoa - 0; Fu…	-0.589249	NS	NS	NS	NS	NS	NS	NS	NS	NS
AGC2-1	AT3G25250	AGC2-1; FUNCTIONS IN: kinase activity; INVOLVED IN: protein amino acid phosphorylation; LOCATED IN: cellular_component unknown; EXPRESSED IN: hypocotyl, root, stamen, pollen tube; EXPRESSED DURING: 4 anthesis, petal differentiation and expansion stage; CONTAINS InterPro DOMAIN/s: Protein kinase, catalytic domain (InterPro:IPR000719), Serine/threonine-protein kinase domain (InterPro:IPR002290), Se…	-0.86217	NS	NS	NS	NS	NS	NS	NS	NS	NS
PAD4	AT3G52430	PHYTOALEXIN DEFICIENT 4 (PAD4); CONTAINS InterPro DOMAIN/s: Lipase, class 3 (InterPro:IPR002921); BEST Arabidopsis thaliana protein match is: senescence-associated gene 101 (TAIR:AT5G14930.2); Has 722 Blast hits to 622 proteins in 73 species: Archae - 0; Bacteria - 23; Metazoa - 17; Fungi - 11; Plants - 620; Viruses - 1; Other Eukaryotes - 50 (source: NCBI BLink).	-0.554693	NS	NS	NS	NS	NS	NS	NS	NS	NS
AT3G52800	AT3G52800	A20/AN1-like zinc finger family protein; FUNCTIONS IN: DNA binding, zinc ion binding; INVOLVED IN: response to chitin; LOCATED IN: cellular_component unknown; EXPRESSED IN: 23 plant structures; EXPRESSED DURING: 15 growth stages; CONTAINS InterPro DOMAIN/s: Zinc finger, AN1-type (InterPro:IPR000058), Zinc finger, A20-type (InterPro:IPR002653); BEST Arabidopsis thaliana protein match is: A20/AN1-l…	-0.763864	NS	NS	NS	NS	NS	0.705728	NS	NS	0.662341
AT4G29780	AT4G29780	unknown protein; BEST Arabidopsis thaliana protein match is: unknown protein (TAIR:AT5G12010.1); Has 945 Blast hits to 944 proteins in 87 species: Archae - 0; Bacteria - 0; Metazoa - 519; Fungi - 43; Plants - 365; Viruses - 0; Other Eukaryotes - 18 (source: NCBI BLink).	-2.14798	NS	NS	NS	-0.842789	NS	NS	NS	NS	NS
GAE1	AT4G30440	UDP-D-glucuronate 4-epimerase 1 (GAE1); FUNCTIONS IN: UDP-glucuronate 4-epimerase activity, catalytic activity; INVOLVED IN: cellular metabolic process, carbohydrate metabolic process, nucleotide-sugar metabolic process, metabolic process; LOCATED IN: cellular_component unknown; EXPRESSED IN: 24 plant structures; EXPRESSED DURING: 15 growth stages; CONTAINS InterPro DOMAIN/s: NAD-dependent epimer…	-0.572339	NS	NS	NS	NS	NS	NS	NS	NS	NS
TIP	AT5G24590	TCV-interacting protein (TIP); CONTAINS InterPro DOMAIN/s: No apical meristem (NAM) protein (InterPro:IPR003441); BEST Arabidopsis thaliana protein match is: NAC domain containing protein 62 (TAIR:AT3G49530.1); Has 2952 Blast hits to 2945 proteins in 75 species: Archae - 0; Bacteria - 0; Metazoa - 0; Fungi - 0; Plants - 2952; Viruses - 0; Other Eukaryotes - 0 (source: NCBI BLink).	-0.651395	NS	NS	NS	NS	NS	NS	NS	NS	0.449922
AT5G42050	AT5G42050	DCD (Development and Cell Death) domain protein; CONTAINS InterPro DOMAIN/s: Development/cell death domain (InterPro:IPR013989), Kelch related (InterPro:IPR013089); BEST Arabidopsis thaliana protein match is: DCD (Development and Cell Death) domain protein (TAIR:AT3G27090.1); Has 30201 Blast hits to 17322 proteins in 780 species: Archae - 12; Bacteria - 1396; Metazoa - 17338; Fungi - 3422; Plants…	-0.555228	NS	NS	NS	NS	NS	NS	NS	NS	NS
WRKY33 target
MAPKKK13	AT1G07150	mitogen-activated protein kinase kinase kinase 13 (MAPKKK13); FUNCTIONS IN: protein serine/threonine kinase activity, protein kinase activity, kinase activity, ATP binding; INVOLVED IN: protein amino acid phosphorylation; EXPRESSED IN: 8 plant structures; EXPRESSED DURING: LP.04 four leaves visible, 4 anthesis, LP.10 ten leaves visible, petal differentiation and expansion stage; CONTAINS InterPro…	-0.867993	NS	NS	NS	NS	NS	NS	NS	NS	NS
AT1G23710	AT1G23710	Protein of unknown function (DUF1645); CONTAINS InterPro DOMAIN/s: Protein of unknown function DUF1645 (InterPro:IPR012442); BEST Arabidopsis thaliana protein match is: Protein of unknown function (DUF1645) (TAIR:AT1G70420.1); Has 288 Blast hits to 282 proteins in 52 species: Archae - 0; Bacteria - 6; Metazoa - 16; Fungi - 11; Plants - 191; Viruses - 0; Other Eukaryotes - 64 (source: NCBI BLink).	-0.604273	NS	NS	NS	NS	NS	NS	NS	NS	NS
RAV2	AT1G68840	related to ABI3/VP1 2 (RAV2); FUNCTIONS IN: transcription repressor activity, DNA binding, sequence-specific DNA binding transcription factor activity; INVOLVED IN: regulation of transcription, DNA-dependent; LOCATED IN: chloroplast; EXPRESSED IN: 12 plant structures; EXPRESSED DURING: 8 growth stages; CONTAINS InterPro DOMAIN/s: DNA-binding, integrase-type (InterPro:IPR016177), Transcriptional f…	-0.752919	NS	NS	-0.875153	NS	NS	1.29488	NS	0.736484	1.31852
UCP5	AT2G22500	uncoupling protein 5 (UCP5); FUNCTIONS IN: binding, dicarboxylic acid transmembrane transporter activity; INVOLVED IN: transport, mitochondrial transport; LOCATED IN: mitochondrion, mitochondrial inner membrane, membrane; EXPRESSED IN: 23 plant structures; EXPRESSED DURING: 15 growth stages; CONTAINS InterPro DOMAIN/s: Mitochondrial substrate carrier (InterPro:IPR001993), Mitochondrial brown fat …	-0.692409	NS	NS	NS	NS	NS	NS	NS	NS	0.39847
AT2G36220	AT2G36220	unknown protein; BEST Arabidopsis thaliana protein match is: unknown protein (TAIR:AT3G52710.1); Has 74 Blast hits to 74 proteins in 10 species: Archae - 0; Bacteria - 0; Metazoa - 0; Fungi - 0; Plants - 74; Viruses - 0; Other Eukaryotes - 0 (source: NCBI BLink).	-1.04098	NS	NS	NS	-0.585502	NS	0.469952	NS	NS	0.791781
CAMBP25	AT2G41010	calmodulin (CAM)-binding protein of 25 kDa (CAMBP25); CONTAINS InterPro DOMAIN/s: VQ (InterPro:IPR008889); BEST Arabidopsis thaliana protein match is: VQ motif-containing protein (TAIR:AT3G56880.1); Has 142 Blast hits to 142 proteins in 12 species: Archae - 0; Bacteria - 0; Metazoa - 0; Fungi - 0; Plants - 142; Viruses - 0; Other Eukaryotes - 0 (source: NCBI BLink).	-0.801834	NS	NS	NS	NS	NS	NS	NS	NS	NS
AGC2-1	AT3G25250	AGC2-1; FUNCTIONS IN: kinase activity; INVOLVED IN: protein amino acid phosphorylation; LOCATED IN: cellular_component unknown; EXPRESSED IN: hypocotyl, root, stamen, pollen tube; EXPRESSED DURING: 4 anthesis, petal differentiation and expansion stage; CONTAINS InterPro DOMAIN/s: Protein kinase, catalytic domain (InterPro:IPR000719), Serine/threonine-protein kinase domain (InterPro:IPR002290), Se…	-0.86217	NS	NS	NS	NS	NS	NS	NS	NS	NS
MYB30	AT3G28910	myb domain protein 30 (MYB30); CONTAINS InterPro DOMAIN/s: SANT, DNA-binding (InterPro:IPR001005), Homeodomain-like (InterPro:IPR009057), Myb, DNA-binding (InterPro:IPR014778), HTH transcriptional regulator, Myb-type, DNA-binding (InterPro:IPR017930), Homeodomain-related (InterPro:IPR012287), Myb transcription factor (InterPro:IPR015495); BEST Arabidopsis thaliana protein match is: myb domain pro…	-0.509911	NS	NS	NS	NS	NS	NS	NS	NS	NS
AT3G52800	AT3G52800	A20/AN1-like zinc finger family protein; FUNCTIONS IN: DNA binding, zinc ion binding; INVOLVED IN: response to chitin; LOCATED IN: cellular_component unknown; EXPRESSED IN: 23 plant structures; EXPRESSED DURING: 15 growth stages; CONTAINS InterPro DOMAIN/s: Zinc finger, AN1-type (InterPro:IPR000058), Zinc finger, A20-type (InterPro:IPR002653); BEST Arabidopsis thaliana protein match is: A20/AN1-l…	-0.763864	NS	NS	NS	NS	NS	0.705728	NS	NS	0.662341
SZF1	AT3G55980	salt-inducible zinc finger 1 (SZF1); CONTAINS InterPro DOMAIN/s: Zinc finger, CCCH-type (InterPro:IPR000571), Ankyrin repeat-containing domain (InterPro:IPR020683), Ankyrin repeat (InterPro:IPR002110); BEST Arabidopsis thaliana protein match is: zinc finger (CCCH-type) family protein (TAIR:AT2G40140.2); Has 1623 Blast hits to 1414 proteins in 181 species: Archae - 2; Bacteria - 49; Metazoa - 777;…	-1.24553	NS	NS	NS	NS	NS	NS	NS	NS	NS
AT3G56880	AT3G56880	VQ motif-containing protein; CONTAINS InterPro DOMAIN/s: VQ (InterPro:IPR008889); BEST Arabidopsis thaliana protein match is: calmodulin (CAM)-binding protein of 25 kDa (TAIR:AT2G41010.1); Has 109 Blast hits to 109 proteins in 12 species: Archae - 0; Bacteria - 0; Metazoa - 0; Fungi - 3; Plants - 106; Viruses - 0; Other Eukaryotes - 0 (source: NCBI BLink).	-0.800108	NS	NS	NS	NS	NS	NS	NS	NS	NS
AT4G29780	AT4G29780	unknown protein; BEST Arabidopsis thaliana protein match is: unknown protein (TAIR:AT5G12010.1); Has 945 Blast hits to 944 proteins in 87 species: Archae - 0; Bacteria - 0; Metazoa - 519; Fungi - 43; Plants - 365; Viruses - 0; Other Eukaryotes - 18 (source: NCBI BLink).	-2.14798	NS	NS	NS	-0.842789	NS	NS	NS	NS	NS
GAE1	AT4G30440	UDP-D-glucuronate 4-epimerase 1 (GAE1); FUNCTIONS IN: UDP-glucuronate 4-epimerase activity, catalytic activity; INVOLVED IN: cellular metabolic process, carbohydrate metabolic process, nucleotide-sugar metabolic process, metabolic process; LOCATED IN: cellular_component unknown; EXPRESSED IN: 24 plant structures; EXPRESSED DURING: 15 growth stages; CONTAINS InterPro DOMAIN/s: NAD-dependent epimer…	-0.572339	NS	NS	NS	NS	NS	NS	NS	NS	NS
AT5G42050	AT5G42050	DCD (Development and Cell Death) domain protein; CONTAINS InterPro DOMAIN/s: Development/cell death domain (InterPro:IPR013989), Kelch related (InterPro:IPR013089); BEST Arabidopsis thaliana protein match is: DCD (Development and Cell Death) domain protein (TAIR:AT3G27090.1); Has 30201 Blast hits to 17322 proteins in 780 species: Archae - 12; Bacteria - 1396; Metazoa - 17338; Fungi - 3422; Plants…	-0.555228	NS	NS	NS	NS	NS	NS	NS	NS	NS
TCH4	AT5G57560	Touch 4 (TCH4); CONTAINS InterPro DOMAIN/s: Xyloglucan endotransglucosylase/hydrolase (InterPro:IPR016455), Xyloglucan endo-transglycosylase, C-terminal (InterPro:IPR010713), Concanavalin A-like lectin/glucanase, subgroup (InterPro:IPR013320), Concanavalin A-like lectin/glucanase (InterPro:IPR008985), Glycoside hydrolase, family 16 (InterPro:IPR000757), Glycoside hydrolase, family 16, active site…	-2.4445	NS	NS	NS	-0.729278	NS	0.761636	NS	NS	0.931645
ABI5 target
ATAF1	AT1G01720	ATAF1; CONTAINS InterPro DOMAIN/s: No apical meristem (NAM) protein (InterPro:IPR003441); BEST Arabidopsis thaliana protein match is: NAC domain containing protein 32 (TAIR:AT1G77450.1); Has 3043 Blast hits to 3037 proteins in 75 species: Archae - 0; Bacteria - 0; Metazoa - 0; Fungi - 0; Plants - 3043; Viruses - 0; Other Eukaryotes - 0 (source: NCBI BLink).	-0.411378	NS	NS	NS	NS	NS	NS	NS	NS	NS
MAPKKK13	AT1G07150	mitogen-activated protein kinase kinase kinase 13 (MAPKKK13); FUNCTIONS IN: protein serine/threonine kinase activity, protein kinase activity, kinase activity, ATP binding; INVOLVED IN: protein amino acid phosphorylation; EXPRESSED IN: 8 plant structures; EXPRESSED DURING: LP.04 four leaves visible, 4 anthesis, LP.10 ten leaves visible, petal differentiation and expansion stage; CONTAINS InterPro…	-0.867993	NS	NS	NS	NS	NS	NS	NS	NS	NS
AT1G23710	AT1G23710	Protein of unknown function (DUF1645); CONTAINS InterPro DOMAIN/s: Protein of unknown function DUF1645 (InterPro:IPR012442); BEST Arabidopsis thaliana protein match is: Protein of unknown function (DUF1645) (TAIR:AT1G70420.1); Has 288 Blast hits to 282 proteins in 52 species: Archae - 0; Bacteria - 6; Metazoa - 16; Fungi - 11; Plants - 191; Viruses - 0; Other Eukaryotes - 64 (source: NCBI BLink).	-0.604273	NS	NS	NS	NS	NS	NS	NS	NS	NS
UCP5	AT2G22500	uncoupling protein 5 (UCP5); FUNCTIONS IN: binding, dicarboxylic acid transmembrane transporter activity; INVOLVED IN: transport, mitochondrial transport; LOCATED IN: mitochondrion, mitochondrial inner membrane, membrane; EXPRESSED IN: 23 plant structures; EXPRESSED DURING: 15 growth stages; CONTAINS InterPro DOMAIN/s: Mitochondrial substrate carrier (InterPro:IPR001993), Mitochondrial brown fat …	-0.692409	NS	NS	NS	NS	NS	NS	NS	NS	0.39847
AT2G36220	AT2G36220	unknown protein; BEST Arabidopsis thaliana protein match is: unknown protein (TAIR:AT3G52710.1); Has 74 Blast hits to 74 proteins in 10 species: Archae - 0; Bacteria - 0; Metazoa - 0; Fungi - 0; Plants - 74; Viruses - 0; Other Eukaryotes - 0 (source: NCBI BLink).	-1.04098	NS	NS	NS	-0.585502	NS	0.469952	NS	NS	0.791781
CZF1	AT2G40140	CZF1; CONTAINS InterPro DOMAIN/s: Zinc finger, CCCH-type (InterPro:IPR000571), Ankyrin repeat-containing domain (InterPro:IPR020683), Ankyrin repeat (InterPro:IPR002110); BEST Arabidopsis thaliana protein match is: salt-inducible zinc finger 1 (TAIR:AT3G55980.1); Has 1196 Blast hits to 1143 proteins in 183 species: Archae - 4; Bacteria - 47; Metazoa - 401; Fungi - 61; Plants - 441; Viruses - 2; O…	-0.769874	NS	NS	NS	NS	NS	NS	NS	NS	NS
CAMBP25	AT2G41010	calmodulin (CAM)-binding protein of 25 kDa (CAMBP25); CONTAINS InterPro DOMAIN/s: VQ (InterPro:IPR008889); BEST Arabidopsis thaliana protein match is: VQ motif-containing protein (TAIR:AT3G56880.1); Has 142 Blast hits to 142 proteins in 12 species: Archae - 0; Bacteria - 0; Metazoa - 0; Fungi - 0; Plants - 142; Viruses - 0; Other Eukaryotes - 0 (source: NCBI BLink).	-0.801834	NS	NS	NS	NS	NS	NS	NS	NS	NS
ERF4	AT3G15210	ethylene responsive element binding factor 4 (ERF4); CONTAINS InterPro DOMAIN/s: DNA-binding, integrase-type (InterPro:IPR016177), Pathogenesis-related transcriptional factor/ERF, DNA-binding (InterPro:IPR001471); BEST Arabidopsis thaliana protein match is: ethylene response factor 8 (TAIR:AT1G53170.1); Has 6170 Blast hits to 5786 proteins in 253 species: Archae - 0; Bacteria - 0; Metazoa - 0; Fu…	-0.589249	NS	NS	NS	NS	NS	NS	NS	NS	NS
PAD4	AT3G52430	PHYTOALEXIN DEFICIENT 4 (PAD4); CONTAINS InterPro DOMAIN/s: Lipase, class 3 (InterPro:IPR002921); BEST Arabidopsis thaliana protein match is: senescence-associated gene 101 (TAIR:AT5G14930.2); Has 722 Blast hits to 622 proteins in 73 species: Archae - 0; Bacteria - 23; Metazoa - 17; Fungi - 11; Plants - 620; Viruses - 1; Other Eukaryotes - 50 (source: NCBI BLink).	-0.554693	NS	NS	NS	NS	NS	NS	NS	NS	NS
AT3G52800	AT3G52800	A20/AN1-like zinc finger family protein; FUNCTIONS IN: DNA binding, zinc ion binding; INVOLVED IN: response to chitin; LOCATED IN: cellular_component unknown; EXPRESSED IN: 23 plant structures; EXPRESSED DURING: 15 growth stages; CONTAINS InterPro DOMAIN/s: Zinc finger, AN1-type (InterPro:IPR000058), Zinc finger, A20-type (InterPro:IPR002653); BEST Arabidopsis thaliana protein match is: A20/AN1-l…	-0.763864	NS	NS	NS	NS	NS	0.705728	NS	NS	0.662341
AT4G29780	AT4G29780	unknown protein; BEST Arabidopsis thaliana protein match is: unknown protein (TAIR:AT5G12010.1); Has 945 Blast hits to 944 proteins in 87 species: Archae - 0; Bacteria - 0; Metazoa - 519; Fungi - 43; Plants - 365; Viruses - 0; Other Eukaryotes - 18 (source: NCBI BLink).	-2.14798	NS	NS	NS	-0.842789	NS	NS	NS	NS	NS
GAE1	AT4G30440	UDP-D-glucuronate 4-epimerase 1 (GAE1); FUNCTIONS IN: UDP-glucuronate 4-epimerase activity, catalytic activity; INVOLVED IN: cellular metabolic process, carbohydrate metabolic process, nucleotide-sugar metabolic process, metabolic process; LOCATED IN: cellular_component unknown; EXPRESSED IN: 24 plant structures; EXPRESSED DURING: 15 growth stages; CONTAINS InterPro DOMAIN/s: NAD-dependent epimer…	-0.572339	NS	NS	NS	NS	NS	NS	NS	NS	NS
AT5G42050	AT5G42050	DCD (Development and Cell Death) domain protein; CONTAINS InterPro DOMAIN/s: Development/cell death domain (InterPro:IPR013989), Kelch related (InterPro:IPR013089); BEST Arabidopsis thaliana protein match is: DCD (Development and Cell Death) domain protein (TAIR:AT3G27090.1); Has 30201 Blast hits to 17322 proteins in 780 species: Archae - 12; Bacteria - 1396; Metazoa - 17338; Fungi - 3422; Plants…	-0.555228	NS	NS	NS	NS	NS	NS	NS	NS	NS
AT5G66650	AT5G66650	Protein of unknown function (DUF607); CONTAINS InterPro DOMAIN/s: Protein of unknown function DUF607 (InterPro:IPR006769); BEST Arabidopsis thaliana protein match is: Protein of unknown function (DUF607) (TAIR:AT2G23790.1); Has 1807 Blast hits to 1807 proteins in 277 species: Archae - 0; Bacteria - 0; Metazoa - 736; Fungi - 347; Plants - 385; Viruses - 0; Other Eukaryotes - 339 (source: NCBI BLin…	-0.7945	NS	NS	NS	NS	NS	0.704774	NS	NS	NS
ANAC042 target
ATAF1	AT1G01720	ATAF1; CONTAINS InterPro DOMAIN/s: No apical meristem (NAM) protein (InterPro:IPR003441); BEST Arabidopsis thaliana protein match is: NAC domain containing protein 32 (TAIR:AT1G77450.1); Has 3043 Blast hits to 3037 proteins in 75 species: Archae - 0; Bacteria - 0; Metazoa - 0; Fungi - 0; Plants - 3043; Viruses - 0; Other Eukaryotes - 0 (source: NCBI BLink).	-0.411378	NS	NS	NS	NS	NS	NS	NS	NS	NS
SRC2	AT1G09070	soybean gene regulated by cold-2 (SRC2); CONTAINS InterPro DOMAIN/s: C2 calcium/lipid-binding domain, CaLB (InterPro:IPR008973), C2 calcium-dependent membrane targeting (InterPro:IPR000008); BEST Arabidopsis thaliana protein match is: Calcium-dependent lipid-binding (CaLB domain) family protein (TAIR:AT3G16510.1); Has 25146 Blast hits to 15856 proteins in 1076 species: Archae - 6; Bacteria - 3010…	-0.916716	NS	NS	NS	NS	NS	NS	NS	NS	0.581027
NUDT4	AT1G18300	nudix hydrolase homolog 4 (NUDT4); FUNCTIONS IN: hydrolase activity; LOCATED IN: cytosol; EXPRESSED IN: stem, root, leaf; CONTAINS InterPro DOMAIN/s: NUDIX hydrolase domain-like (InterPro:IPR015797), NUDIX hydrolase, conserved site (InterPro:IPR020084), NUDIX hydrolase domain (InterPro:IPR000086); BEST Arabidopsis thaliana protein match is: nudix hydrolase homolog 21 (TAIR:AT1G73540.1); Has 1264 …	-1.62969	NS	NS	NS	NS	NS	NS	NS	NS	NS
AT1G23710	AT1G23710	Protein of unknown function (DUF1645); CONTAINS InterPro DOMAIN/s: Protein of unknown function DUF1645 (InterPro:IPR012442); BEST Arabidopsis thaliana protein match is: Protein of unknown function (DUF1645) (TAIR:AT1G70420.1); Has 288 Blast hits to 282 proteins in 52 species: Archae - 0; Bacteria - 6; Metazoa - 16; Fungi - 11; Plants - 191; Viruses - 0; Other Eukaryotes - 64 (source: NCBI BLink).	-0.604273	NS	NS	NS	NS	NS	NS	NS	NS	NS
PME1	AT1G53840	pectin methylesterase 1 (PME1); FUNCTIONS IN: pectinesterase activity; INVOLVED IN: cell wall modification; LOCATED IN: extracellular region, plasma membrane, membrane, plant-type cell wall; EXPRESSED IN: 24 plant structures; EXPRESSED DURING: 13 growth stages; CONTAINS InterPro DOMAIN/s: Pectinesterase, active site (InterPro:IPR018040), Pectin lyase fold/virulence factor (InterPro:IPR011050), Pe…	-0.498534	NS	NS	NS	NS	NS	NS	NS	NS	NS
RAV2	AT1G68840	related to ABI3/VP1 2 (RAV2); FUNCTIONS IN: transcription repressor activity, DNA binding, sequence-specific DNA binding transcription factor activity; INVOLVED IN: regulation of transcription, DNA-dependent; LOCATED IN: chloroplast; EXPRESSED IN: 12 plant structures; EXPRESSED DURING: 8 growth stages; CONTAINS InterPro DOMAIN/s: DNA-binding, integrase-type (InterPro:IPR016177), Transcriptional f…	-0.752919	NS	NS	-0.875153	NS	NS	1.29488	NS	0.736484	1.31852
AT2G36580	AT2G36580	Pyruvate kinase family protein; FUNCTIONS IN: pyruvate kinase activity, potassium ion binding, magnesium ion binding, catalytic activity; INVOLVED IN: glycolysis; LOCATED IN: plasma membrane; EXPRESSED IN: guard cell; CONTAINS InterPro DOMAIN/s: Pyruvate/Phosphoenolpyruvate kinase, catalytic core (InterPro:IPR015813), Pyruvate kinase, alpha/beta (InterPro:IPR015794), Pyruvate kinase, beta-barrel-…	-0.380413	-0.654796	-0.756851	NS	-0.743803	NS	NS	NS	NS	NS
ERF4	AT3G15210	ethylene responsive element binding factor 4 (ERF4); CONTAINS InterPro DOMAIN/s: DNA-binding, integrase-type (InterPro:IPR016177), Pathogenesis-related transcriptional factor/ERF, DNA-binding (InterPro:IPR001471); BEST Arabidopsis thaliana protein match is: ethylene response factor 8 (TAIR:AT1G53170.1); Has 6170 Blast hits to 5786 proteins in 253 species: Archae - 0; Bacteria - 0; Metazoa - 0; Fu…	-0.589249	NS	NS	NS	NS	NS	NS	NS	NS	NS
AGC2-1	AT3G25250	AGC2-1; FUNCTIONS IN: kinase activity; INVOLVED IN: protein amino acid phosphorylation; LOCATED IN: cellular_component unknown; EXPRESSED IN: hypocotyl, root, stamen, pollen tube; EXPRESSED DURING: 4 anthesis, petal differentiation and expansion stage; CONTAINS InterPro DOMAIN/s: Protein kinase, catalytic domain (InterPro:IPR000719), Serine/threonine-protein kinase domain (InterPro:IPR002290), Se…	-0.86217	NS	NS	NS	NS	NS	NS	NS	NS	NS
MYB30	AT3G28910	myb domain protein 30 (MYB30); CONTAINS InterPro DOMAIN/s: SANT, DNA-binding (InterPro:IPR001005), Homeodomain-like (InterPro:IPR009057), Myb, DNA-binding (InterPro:IPR014778), HTH transcriptional regulator, Myb-type, DNA-binding (InterPro:IPR017930), Homeodomain-related (InterPro:IPR012287), Myb transcription factor (InterPro:IPR015495); BEST Arabidopsis thaliana protein match is: myb domain pro…	-0.509911	NS	NS	NS	NS	NS	NS	NS	NS	NS
PAD4	AT3G52430	PHYTOALEXIN DEFICIENT 4 (PAD4); CONTAINS InterPro DOMAIN/s: Lipase, class 3 (InterPro:IPR002921); BEST Arabidopsis thaliana protein match is: senescence-associated gene 101 (TAIR:AT5G14930.2); Has 722 Blast hits to 622 proteins in 73 species: Archae - 0; Bacteria - 23; Metazoa - 17; Fungi - 11; Plants - 620; Viruses - 1; Other Eukaryotes - 50 (source: NCBI BLink).	-0.554693	NS	NS	NS	NS	NS	NS	NS	NS	NS
SZF1	AT3G55980	salt-inducible zinc finger 1 (SZF1); CONTAINS InterPro DOMAIN/s: Zinc finger, CCCH-type (InterPro:IPR000571), Ankyrin repeat-containing domain (InterPro:IPR020683), Ankyrin repeat (InterPro:IPR002110); BEST Arabidopsis thaliana protein match is: zinc finger (CCCH-type) family protein (TAIR:AT2G40140.2); Has 1623 Blast hits to 1414 proteins in 181 species: Archae - 2; Bacteria - 49; Metazoa - 777;…	-1.24553	NS	NS	NS	NS	NS	NS	NS	NS	NS
AT3G56880	AT3G56880	VQ motif-containing protein; CONTAINS InterPro DOMAIN/s: VQ (InterPro:IPR008889); BEST Arabidopsis thaliana protein match is: calmodulin (CAM)-binding protein of 25 kDa (TAIR:AT2G41010.1); Has 109 Blast hits to 109 proteins in 12 species: Archae - 0; Bacteria - 0; Metazoa - 0; Fungi - 3; Plants - 106; Viruses - 0; Other Eukaryotes - 0 (source: NCBI BLink).	-0.800108	NS	NS	NS	NS	NS	NS	NS	NS	NS
GAE1	AT4G30440	UDP-D-glucuronate 4-epimerase 1 (GAE1); FUNCTIONS IN: UDP-glucuronate 4-epimerase activity, catalytic activity; INVOLVED IN: cellular metabolic process, carbohydrate metabolic process, nucleotide-sugar metabolic process, metabolic process; LOCATED IN: cellular_component unknown; EXPRESSED IN: 24 plant structures; EXPRESSED DURING: 15 growth stages; CONTAINS InterPro DOMAIN/s: NAD-dependent epimer…	-0.572339	NS	NS	NS	NS	NS	NS	NS	NS	NS
TIP	AT5G24590	TCV-interacting protein (TIP); CONTAINS InterPro DOMAIN/s: No apical meristem (NAM) protein (InterPro:IPR003441); BEST Arabidopsis thaliana protein match is: NAC domain containing protein 62 (TAIR:AT3G49530.1); Has 2952 Blast hits to 2945 proteins in 75 species: Archae - 0; Bacteria - 0; Metazoa - 0; Fungi - 0; Plants - 2952; Viruses - 0; Other Eukaryotes - 0 (source: NCBI BLink).	-0.651395	NS	NS	NS	NS	NS	NS	NS	NS	0.449922
AT5G42050	AT5G42050	DCD (Development and Cell Death) domain protein; CONTAINS InterPro DOMAIN/s: Development/cell death domain (InterPro:IPR013989), Kelch related (InterPro:IPR013089); BEST Arabidopsis thaliana protein match is: DCD (Development and Cell Death) domain protein (TAIR:AT3G27090.1); Has 30201 Blast hits to 17322 proteins in 780 species: Archae - 12; Bacteria - 1396; Metazoa - 17338; Fungi - 3422; Plants…	-0.555228	NS	NS	NS	NS	NS	NS	NS	NS	NS
ERF4 target
ATAF1	AT1G01720	ATAF1; CONTAINS InterPro DOMAIN/s: No apical meristem (NAM) protein (InterPro:IPR003441); BEST Arabidopsis thaliana protein match is: NAC domain containing protein 32 (TAIR:AT1G77450.1); Has 3043 Blast hits to 3037 proteins in 75 species: Archae - 0; Bacteria - 0; Metazoa - 0; Fungi - 0; Plants - 3043; Viruses - 0; Other Eukaryotes - 0 (source: NCBI BLink).	-0.411378	NS	NS	NS	NS	NS	NS	NS	NS	NS
AT1G07135	AT1G07135	glycine-rich protein; Has 22251 Blast hits to 8348 proteins in 789 species: Archae - 21; Bacteria - 7328; Metazoa - 6126; Fungi - 1280; Plants - 3980; Viruses - 524; Other Eukaryotes - 2992 (source: NCBI BLink).	-1.81186	NS	NS	NS	NS	NS	NS	NS	NS	NS
SRC2	AT1G09070	soybean gene regulated by cold-2 (SRC2); CONTAINS InterPro DOMAIN/s: C2 calcium/lipid-binding domain, CaLB (InterPro:IPR008973), C2 calcium-dependent membrane targeting (InterPro:IPR000008); BEST Arabidopsis thaliana protein match is: Calcium-dependent lipid-binding (CaLB domain) family protein (TAIR:AT3G16510.1); Has 25146 Blast hits to 15856 proteins in 1076 species: Archae - 6; Bacteria - 3010…	-0.916716	NS	NS	NS	NS	NS	NS	NS	NS	0.581027
AT1G23710	AT1G23710	Protein of unknown function (DUF1645); CONTAINS InterPro DOMAIN/s: Protein of unknown function DUF1645 (InterPro:IPR012442); BEST Arabidopsis thaliana protein match is: Protein of unknown function (DUF1645) (TAIR:AT1G70420.1); Has 288 Blast hits to 282 proteins in 52 species: Archae - 0; Bacteria - 6; Metazoa - 16; Fungi - 11; Plants - 191; Viruses - 0; Other Eukaryotes - 64 (source: NCBI BLink).	-0.604273	NS	NS	NS	NS	NS	NS	NS	NS	NS
PME1	AT1G53840	pectin methylesterase 1 (PME1); FUNCTIONS IN: pectinesterase activity; INVOLVED IN: cell wall modification; LOCATED IN: extracellular region, plasma membrane, membrane, plant-type cell wall; EXPRESSED IN: 24 plant structures; EXPRESSED DURING: 13 growth stages; CONTAINS InterPro DOMAIN/s: Pectinesterase, active site (InterPro:IPR018040), Pectin lyase fold/virulence factor (InterPro:IPR011050), Pe…	-0.498534	NS	NS	NS	NS	NS	NS	NS	NS	NS
RAV2	AT1G68840	related to ABI3/VP1 2 (RAV2); FUNCTIONS IN: transcription repressor activity, DNA binding, sequence-specific DNA binding transcription factor activity; INVOLVED IN: regulation of transcription, DNA-dependent; LOCATED IN: chloroplast; EXPRESSED IN: 12 plant structures; EXPRESSED DURING: 8 growth stages; CONTAINS InterPro DOMAIN/s: DNA-binding, integrase-type (InterPro:IPR016177), Transcriptional f…	-0.752919	NS	NS	-0.875153	NS	NS	1.29488	NS	0.736484	1.31852
AT2G36220	AT2G36220	unknown protein; BEST Arabidopsis thaliana protein match is: unknown protein (TAIR:AT3G52710.1); Has 74 Blast hits to 74 proteins in 10 species: Archae - 0; Bacteria - 0; Metazoa - 0; Fungi - 0; Plants - 74; Viruses - 0; Other Eukaryotes - 0 (source: NCBI BLink).	-1.04098	NS	NS	NS	-0.585502	NS	0.469952	NS	NS	0.791781
HSPRO2	AT2G40000	ortholog of sugar beet HS1 PRO-1 2 (HSPRO2); CONTAINS InterPro DOMAIN/s: Hs1pro-1, C-terminal (InterPro:IPR009743), Hs1pro-1, N-terminal (InterPro:IPR009869); BEST Arabidopsis thaliana protein match is: Hs1pro-1 protein (TAIR:AT3G55840.1); Has 71 Blast hits to 71 proteins in 18 species: Archae - 0; Bacteria - 0; Metazoa - 0; Fungi - 0; Plants - 60; Viruses - 0; Other Eukaryotes - 11 (source: NCBI…	-0.906802	NS	NS	NS	NS	NS	0.77457	NS	NS	1.16558
CAMBP25	AT2G41010	calmodulin (CAM)-binding protein of 25 kDa (CAMBP25); CONTAINS InterPro DOMAIN/s: VQ (InterPro:IPR008889); BEST Arabidopsis thaliana protein match is: VQ motif-containing protein (TAIR:AT3G56880.1); Has 142 Blast hits to 142 proteins in 12 species: Archae - 0; Bacteria - 0; Metazoa - 0; Fungi - 0; Plants - 142; Viruses - 0; Other Eukaryotes - 0 (source: NCBI BLink).	-0.801834	NS	NS	NS	NS	NS	NS	NS	NS	NS
TCH3	AT2G41100	TOUCH 3 (TCH3); FUNCTIONS IN: calcium ion binding; INVOLVED IN: response to mechanical stimulus, response to temperature stimulus, thigmotropism, response to absence of light; LOCATED IN: plasma membrane; EXPRESSED IN: 26 plant structures; EXPRESSED DURING: 14 growth stages; CONTAINS InterPro DOMAIN/s: EF-Hand 1, calcium-binding site (InterPro:IPR018247), EF-HAND 2 (InterPro:IPR018249), Calcium-b…	-0.885109	NS	NS	NS	0.966574	NS	1.37416	NS	NS	1.46527
ERF4	AT3G15210	ethylene responsive element binding factor 4 (ERF4); CONTAINS InterPro DOMAIN/s: DNA-binding, integrase-type (InterPro:IPR016177), Pathogenesis-related transcriptional factor/ERF, DNA-binding (InterPro:IPR001471); BEST Arabidopsis thaliana protein match is: ethylene response factor 8 (TAIR:AT1G53170.1); Has 6170 Blast hits to 5786 proteins in 253 species: Archae - 0; Bacteria - 0; Metazoa - 0; Fu…	-0.589249	NS	NS	NS	NS	NS	NS	NS	NS	NS
AGC2-1	AT3G25250	AGC2-1; FUNCTIONS IN: kinase activity; INVOLVED IN: protein amino acid phosphorylation; LOCATED IN: cellular_component unknown; EXPRESSED IN: hypocotyl, root, stamen, pollen tube; EXPRESSED DURING: 4 anthesis, petal differentiation and expansion stage; CONTAINS InterPro DOMAIN/s: Protein kinase, catalytic domain (InterPro:IPR000719), Serine/threonine-protein kinase domain (InterPro:IPR002290), Se…	-0.86217	NS	NS	NS	NS	NS	NS	NS	NS	NS
PAD4	AT3G52430	PHYTOALEXIN DEFICIENT 4 (PAD4); CONTAINS InterPro DOMAIN/s: Lipase, class 3 (InterPro:IPR002921); BEST Arabidopsis thaliana protein match is: senescence-associated gene 101 (TAIR:AT5G14930.2); Has 722 Blast hits to 622 proteins in 73 species: Archae - 0; Bacteria - 23; Metazoa - 17; Fungi - 11; Plants - 620; Viruses - 1; Other Eukaryotes - 50 (source: NCBI BLink).	-0.554693	NS	NS	NS	NS	NS	NS	NS	NS	NS
AT3G56880	AT3G56880	VQ motif-containing protein; CONTAINS InterPro DOMAIN/s: VQ (InterPro:IPR008889); BEST Arabidopsis thaliana protein match is: calmodulin (CAM)-binding protein of 25 kDa (TAIR:AT2G41010.1); Has 109 Blast hits to 109 proteins in 12 species: Archae - 0; Bacteria - 0; Metazoa - 0; Fungi - 3; Plants - 106; Viruses - 0; Other Eukaryotes - 0 (source: NCBI BLink).	-0.800108	NS	NS	NS	NS	NS	NS	NS	NS	NS
AT4G29780	AT4G29780	unknown protein; BEST Arabidopsis thaliana protein match is: unknown protein (TAIR:AT5G12010.1); Has 945 Blast hits to 944 proteins in 87 species: Archae - 0; Bacteria - 0; Metazoa - 519; Fungi - 43; Plants - 365; Viruses - 0; Other Eukaryotes - 18 (source: NCBI BLink).	-2.14798	NS	NS	NS	-0.842789	NS	NS	NS	NS	NS

## Sheet: Group IV-h
GO- and Transcription Factor- Enrichment analyses of group-IVh genes
Gene Annotation			Root					Shoot
Gene ID	Symbol	Description	Col	adc1	OXPtADC	cdr7/cuao3	OXCuAO3	Col	adc1	OXPtADC	cdr7/cuao3	OXCuAO3
AT1G13260	RAV1	related to ABI3/VP1 1 [Source:NCBI gene (formerly Entrezgene);Acc:837886]	NS	NS	NS	0.838877	NS	-0.552803	NS	NS	NS	NS
AT1G14200	AT1G14200	RING/U-box superfamily protein [Source:NCBI gene (formerly Entrezgene);Acc:837980]	NS	NS	NS	NS	NS	-0.797793	-0.722757	NS	NS	NS
AT1G54050	AT1G54050	HSP20-like chaperones superfamily protein [Source:NCBI gene (formerly Entrezgene);Acc:841843]	NS	NS	NS	NS	NS	-1.56263	-1.56044	-1.68799	-2.04272	-1.21066
AT1G65490	AT1G65490	transmembrane protein [Source:NCBI gene (formerly Entrezgene);Acc:842861]	NS	NS	NS	NS	NS	-2.1406	-1.2489	NS	NS	NS
AT1G66080	AT1G66080	hikeshi-like protein [Source:NCBI gene (formerly Entrezgene);Acc:842922]	NS	NS	NS	NS	NS	-1.69278	-2.06037	-1.04269	NS	-1.45447
AT1G66090	AT1G66090	Disease resistance protein (TIR-NBS class) [Source:NCBI gene (formerly Entrezgene);Acc:842923]	NS	NS	NS	NS	NS	-0.816639	NS	NS	NS	NS
AT1G72910	AT1G72910	Toll-Interleukin-Resistance (TIR) domain-containing protein [Source:NCBI gene (formerly Entrezgene);Acc:843622]	NS	NS	NS	NS	NS	-2.0233	NS	NS	NS	NS
AT2G36800	DOGT1	don-glucosyltransferase 1 [Source:NCBI gene (formerly Entrezgene);Acc:818252]	NS	NS	-1.59081	NS	NS	-0.53807	NS	NS	NS	NS
AT2G41090	AT2G41090	Calcium-binding EF-hand family protein [Source:NCBI gene (formerly Entrezgene);Acc:818708]	NS	NS	NS	NS	NS	-1.01028	-0.698447	-0.849569	-0.657323	NS
AT3G22550	AT3G22550	NAD(P)H-quinone oxidoreductase subunit, putative (DUF581) [Source:NCBI gene (formerly Entrezgene);Acc:821826]	NS	NS	NS	NS	NS	-1.00755	-1.09315	-0.859744	-0.970873	-0.965207
AT3G56400	WRKY70	WRKY DNA-binding protein 70 [Source:NCBI gene (formerly Entrezgene);Acc:824807]	NS	NS	NS	NS	NS	-1.38728	NS	NS	NS	NS
AT4G19520	AT4G19520	disease resistance protein (TIR-NBS-LRR class) family [Source:NCBI gene (formerly Entrezgene);Acc:827694]	NS	NS	NS	NS	NS	-0.76173	NS	NS	NS	NS
AT5G03380	AT5G03380	Heavy metal transport/detoxification superfamily protein [Source:NCBI gene (formerly Entrezgene);Acc:831854]	NS	NS	NS	NS	NS	-0.50344	NS	NS	NS	NS
AT5G04340	ZAT6	6 [Source:NCBI gene (formerly Entrezgene);Acc:830313]	NS	NS	NS	NS	NS	-0.752969	NS	NS	NS	NS
AT5G19240	AT5G19240	Glycoprotein membrane GPI-anchored [Source:NCBI gene (formerly Entrezgene);Acc:832044]	NS	NS	NS	NS	NS	-2.04906	NS	-1.56814	-1.71344	-1.04039
AT5G58120	AT5G58120	Disease resistance protein (TIR-NBS-LRR class) family [Source:NCBI gene (formerly Entrezgene);Acc:835924]	NS	NS	NS	NS	NS	-0.787403	NS	NS	NS	NS
GO enrichment analysis
GO-BP
Enrichment FDR	nGenes	Biological Process (BP)	Pathway Genes	Fold Enrichment
7.77359e-32	16	cellular response to hypoxia	240	115.117
7.77359e-32	16	cellular response to decreased oxygen levels	242	114.165
2.66934e-31	16	response to hypoxia	267	103.476
2.66934e-31	16	response to oxygen levels	272	101.574
0.0410365	2	response to brassinosteroid	124	27.8508
1.70749e-20	16	cellular response to stress	1272	21.7201
3.66486e-18	16	cellular response to chemical stimulus	1791	15.426
7.10952e-17	16	response to abiotic stimulus	2170	12.7318
0.0397482	3	response to oxidative stress	454	11.4102
1.86851e-14	16	response to chemical	3091	8.93821
8.03984e-13	16	response to stress	3953	6.98912
0.00630076	6	defense response	1704	6.08011
0.013397	6	signal transduction	1986	5.21677
0.0140228	6	signaling	2029	5.10621
0.0267323	6	cell communication	2320	4.46573
Enrichment FDR	nGenes	Molecular Function (MF)	Pathway Genes	Fold Enrichment
0.0136858	1	trans-zeatin O-beta-D-glucosyltransferase activity	3	575.583
0.0136858	1	cis-zeatin O-beta-D-glucosyltransferase activity	3	575.583
0.0277451	1	quercetin 4-O-glucosyltransferase activity	8	215.844
0.000140794	4	ADP binding	174	39.6954
0.00514864	5	sequence-specific double-stranded DNA binding	998	8.65105
0.005677	5	double-stranded DNA binding	1112	7.76416
0.0136858	4	transcription cis-regulatory region binding	979	7.05516
0.0136858	4	transcription regulatory region nucleic acid binding	979	7.05516
0.00784893	5	sequence-specific DNA binding	1270	6.79823
GO-CC
Enrichment FDR	nGenes	Cellular Component (CC)	Pathway Genes	Fold Enrichment
NS
Transcription factor enrichment analysis
TF-AGRIS
Enrichment FDR	nGenes	Transcription Factor Binding Site	Pathway Genes	Fold Enrichment
NS

## Sheet: Group V-h
GO- and Transcription Factor- Enrichment analyses of group-Vh genes
Gene Annotation			Root					Shoot
Gene ID	Symbol	Description	Col	adc1	OXPtADC	cdr7/cuao3	OXCuAO3	Col	adc1	OXPtADC	cdr7/cuao3	OXCuAO3
AT1G05880	ARI12	RING/U-box superfamily protein [Source:NCBI gene (formerly Entrezgene);Acc:837098]	2.07489	2.33617	NS	NS	NS	NS	NS	NS	NS	NS
AT1G19250	FMO1	flavin-dependent monooxygenase 1 [Source:NCBI gene (formerly Entrezgene);Acc:838508]	1.35299	2.68445	NS	NS	NS	NS	NS	NS	NS	NS
AT1G26410	AT1G26410	FAD-binding Berberine family protein [Source:NCBI gene (formerly Entrezgene);Acc:839183]	2.30866	2.78888	NS	NS	1.85653	NS	NS	NS	NS	NS
AT1G72900	AT1G72900	Toll-Interleukin-Resistance (TIR) domain-containing protein [Source:NCBI gene (formerly Entrezgene);Acc:843621]	1.0783	1.79987	NS	NS	1.37993	NS	0.883347	NS	NS	1.0335
AT1G73010	PS2	inorganic pyrophosphatase 1 [Source:NCBI gene (formerly Entrezgene);Acc:843632]	2.47185	2.43879	1.04891	NS	2.88689	NS	1.69813	1.17611	NS	1.41957
AT1G78850	AT1G78850	D-mannose binding lectin protein with Apple-like carbohydrate-binding domain-containing protein [Source:NCBI gene (formerly Entrezgene);Acc:844222]	0.601259	0.596164	NS	NS	0.758181	NS	NS	NS	NS	0.565992
AT2G23270	AT2G23270	transmembrane protein [Source:NCBI gene (formerly Entrezgene);Acc:816859]	2.51254	3.07644	NS	NS	1.97627	NS	NS	NS	NS	NS
AT2G26660	SPX2	SPX domain-containing protein 2 (SPX2) [Source:NCBI gene (formerly Entrezgene);Acc:817207]	0.791109	NS	NS	NS	0.783119	NS	NS	NS	NS	0.662352
AT2G44800	AT2G44800	2-oxoglutarate (2OG) and Fe(II)-dependent oxygenase superfamily protein [Source:NCBI gene (formerly Entrezgene);Acc:819089]	1.01154	NS	NS	NS	NS	NS	NS	NS	NS	NS
AT3G24715	AT3G24715	kinase superfamily with octicosapeptide/Phox/Bem1p domain-containing protein [Source:NCBI gene (formerly Entrezgene);Acc:822069]	0.452007	NS	NS	NS	NS	NS	NS	NS	NS	NS
AT5G20150	SPX1	SPX domain-containing protein 1 [Source:NCBI gene (formerly Entrezgene);Acc:832137]	3.00406	2.97472	2.00988	NS	3.18152	NS	NS	1.28738	NS	1.17236
AT5G20790	AT5G20790	transmembrane protein [Source:NCBI gene (formerly Entrezgene);Acc:832202]	4.10471	3.63045	2.30165	NS	3.57968	NS	NS	NS	NS	1.40869
AT5G20830	SUS1	sucrose synthase 1 [Source:NCBI gene (formerly Entrezgene);Acc:832206]	0.640792	NS	NS	NS	NS	NS	0.589452	NS	NS	NS
AT5G25110	CIPK25	CBL-interacting protein kinase 25 [Source:NCBI gene (formerly Entrezgene);Acc:832582]	1.11497	1.18499	NS	1.29079	0.981915	NS	NS	NS	NS	NS
AT5G65207	AT5G65207		0.791058	1.33537	NS	NS	1.20294	NS	2.22867	1.44751	NS	2.99877
GO enrichment analysis
GO-BP
Enrichment FDR	nGenes	Biological Process (BP)	Pathway Genes	Fold Enrichment
5.15113e-27	14	cellular response to hypoxia	240	107.442
5.15113e-27	14	cellular response to decreased oxygen levels	242	106.554
3.46666e-29	15	response to hypoxia	267	103.476
3.46666e-29	15	response to decreased oxygen levels	271	101.948
0.000143434	3	cellular response to phosphate starvation	78	70.841
0.00148609	3	cellular response to nutrient levels	179	30.8693
0.00202029	3	response to starvation	203	27.2197
0.00231424	3	cellular response to extracellular stimulus	217	25.4636
0.00236828	3	cellular response to external stimulus	223	24.7785
7.14665e-17	14	cellular response to stress	1272	20.2721
6.70663e-15	14	cellular response to chemical stimulus	1791	14.3976
6.19378e-16	15	response to abiotic stimulus	2170	12.7318
1.01892e-11	14	response to chemical	3091	8.34233
2.90194e-13	15	cellular response to stimulus	3315	8.33424
3.71681e-12	15	response to stress	3953	6.98912
0.00338605	6	response to external stimulus	1947	5.67601
GO-MF
Enrichment FDR	nGenes	Molecular Function (MF)	Pathway Genes	Fold Enrichment
NS
GO-CC
Enrichment FDR	nGenes	Cellular Component (CC)	Pathway Genes	Fold Enrichment
NS
Transcription factor enrichment analysis
TF-AGRIS
Enrichment FDR	nGenes	Transcription Factor Binding Site	Pathway Genes	Fold Enrichment
NS

## Sheet: Group VI-h
GO- and Transcription Factor- Enrichment analyses of group-VIh genes													Predicted TF Target Element	*: Zubrycka et al. (2023) Nature Communications 14: 4665.
Gene Annotation			Root					Shoot						Responsive to ERF transcription factors *	Promoter binding to ERF*
Gene ID	Symbol	Description	Col	adc1	OXPtADC	cdr7/cuao3	OXCuAO3	Col	adc1	OXPtADC	cdr7/cuao3	OXCuAO3	ATBHLH15
AT1G13300	HRS1	myb-like transcription factor family protein [Source:NCBI gene (formerly Entrezgene);Acc:837890]	NS	NS	NS	NS	NS	1.38555	1.44955	NS	NS	1.69656
AT1G25550	AT1G25550	myb-like transcription factor family protein [Source:NCBI gene (formerly Entrezgene);Acc:839142]	NS	NS	NS	NS	NS	0.688647	0.984733	0.916165	0.988444	1.01431	x	Yes
AT1G25560	TEM1	AP2/B3 transcription factor family protein [Source:NCBI gene (formerly Entrezgene);Acc:839143]	NS	NS	NS	NS	NS	0.528481	1.24149	NS	0.794826	1.27606		Yes
AT1G43800	FTM1	Plant stearoyl-acyl-carrier-protein desaturase family protein [Source:NCBI gene (formerly Entrezgene);Acc:840977]	NS	NS	NS	NS	NS	2.85812	1.90005	2.27507	3.1464	1.13501		Yes
AT1G53910	RAP2.12	related to AP2 12 [Source:NCBI gene (formerly Entrezgene);Acc:841829]	NS	NS	NS	NS	NS	0.381382	0.419751	NS	0.32968	0.34842		Yes	Yes
AT1G59660	AT1G59660	Nucleoporin autopeptidase [Source:NCBI gene (formerly Entrezgene);Acc:842256]	NS	NS	NS	NS	NS	0.953973	NS	1.13518	NS	NS
AT1G66180	AT1G66180	Eukaryotic aspartyl protease family protein [Source:NCBI gene (formerly Entrezgene);Acc:842933]	NS	NS	NS	NS	NS	1.18854	0.916195	1.20814	1.23998	0.91622		Yes	Yes
AT1G68670	AT1G68670	myb-like transcription factor family protein [Source:NCBI gene (formerly Entrezgene);Acc:843197]	NS	NS	NS	NS	NS	0.405206	0.753187	NS	NS	0.694127	x	Yes	Yes
AT1G69890	AT1G69890	actin cross-linking protein (DUF569) [Source:NCBI gene (formerly Entrezgene);Acc:843325]	NS	NS	NS	NS	0.604577	1.15526	2.12328	NS	NS	2.3313	x	Yes
AT1G74940	AT1G74940	cyclin-dependent kinase, putative (DUF581) [Source:NCBI gene (formerly Entrezgene);Acc:843833]	NS	NS	NS	NS	NS	0.687163	0.793888	1.2759	0.473168	1.23283	x	Yes
AT2G16060	HB1	hemoglobin 1 [Source:NCBI gene (formerly Entrezgene);Acc:816103]	NS	NS	NS	NS	NS	2.54847	2.60053	2.14529	3.38517	2.61328		Yes
AT2G31810	AT2G31810	ACT domain-containing small subunit of acetolactate synthase protein [Source:NCBI gene (formerly Entrezgene);Acc:817738]	NS	0.615988	NS	0.544967	0.627992	1.72102	1.58756	1.36712	1.94088	1.76718		Yes	Yes
AT2G41430	ERD15	dehydration-induced protein (ERD15) [Source:NCBI gene (formerly Entrezgene);Acc:818741]	NS	NS	NS	NS	NS	0.674625	0.88869	NS	0.818065	1.13292		Yes	Yes
AT3G02555	AT3G02555		NS	NS	NS	NS	NS	0.672622	0.704385	NS	NS	NS
AT3G03270	AT3G03270	Adenine nucleotide alpha hydrolases-like superfamily protein [Source:NCBI gene (formerly Entrezgene);Acc:821303]	NS	NS	NS	NS	NS	1.03592	1.00785	NS	NS	NS		Yes
AT3G10020	AT3G10020	plant/protein [Source:NCBI gene (formerly Entrezgene);Acc:820163]	NS	NS	NS	0.783355	NS	1.00945	1.57589	1.19144	1.02209	1.88279	x	Yes
AT3G10040	AT3G10040	sequence-specific DNA binding transcription factor [Source:NCBI gene (formerly Entrezgene);Acc:820165]	NS	NS	NS	NS	NS	2.37213	2.70588	2.16516	2.49919	2.03262		Yes	Yes
AT3G13310	AT3G13310	Chaperone DnaJ-domain superfamily protein [Source:NCBI gene (formerly Entrezgene);Acc:820531]	NS	NS	NS	NS	NS	0.810835	1.25501	NS	0.729939	1.28915	x
AT3G14100	AT3G14100	RNA-binding (RRM/RBD/RNP motifs) family protein [Source:NCBI gene (formerly Entrezgene);Acc:820626]	NS	NS	NS	NS	NS	0.53352	0.457032	NS	0.435786	0.549651
AT3G14230	RAP2.2	related to AP2 2 [Source:NCBI gene (formerly Entrezgene);Acc:820643]	NS	NS	NS	NS	NS	1.11461	1.13957	1.13168	1.35968	1.28	x	Yes	Yes
AT3G20770	EIN3	Ethylene insensitive 3 family protein [Source:NCBI gene (formerly Entrezgene);Acc:821625]	NS	NS	NS	NS	NS	0.717922	0.590367	0.601454	0.804611	0.764152		Yes
AT3G27220	AT3G27220	Galactose oxidase/kelch repeat superfamily protein [Source:NCBI gene (formerly Entrezgene);Acc:822341]	NS	NS	NS	NS	NS	1.54738	2.03203	1.31535	1.63465	1.77216		Yes	Yes
AT3G30775	ERD5	Methylenetetrahydrofolate reductase family protein [Source:NCBI gene (formerly Entrezgene);Acc:822833]	NS	0.56469	NS	0.950869	0.717196	1.58913	1.45643	0.994224	1.68695	1.21063	x	Yes
AT3G50440	MES10	methylesterase [Source:NCBI gene (formerly Entrezgene);Acc:824208]	NS	NS	NS	NS	NS	0.649227	NS	NS	NS	0.763355		Yes
AT3G58670	AT3G58670	2-aminoethanethiol dioxygenase, putative (DUF1637) [Source:NCBI gene (formerly Entrezgene);Acc:825036]	NS	NS	NS	NS	NS	0.559079	NS	0.717527	0.764012	0.689074		Yes	Yes
AT4G19880	AT4G19880	Glutathione S-transferase family protein [Source:NCBI gene (formerly Entrezgene);Acc:827734]	NS	NS	NS	NS	NS	1.0891	1.36377	1.17673	1.06805	1.4192		Yes
AT4G20380	LSD1	LSD1 zinc finger family protein [Source:NCBI gene (formerly Entrezgene);Acc:827786]	NS	NS	NS	NS	NS	0.719461	NS	NS	0.663228	0.611183		Yes
AT4G27460	CBSX5	Cystathionine beta-synthase (CBS) family protein [Source:NCBI gene (formerly Entrezgene);Acc:828855]	NS	NS	NS	NS	1.04837	1.90535	2.2183	2.59816	2.78151	3.18452	x
AT4G33560	AT4G33560	Wound-responsive family protein [Source:NCBI gene (formerly Entrezgene);Acc:829495]	NS	NS	NS	NS	NS	1.06781	NS	NS	NS	NS		Yes	Yes
AT5G19230	AT5G19230	Glycoprotein membrane GPI-anchored [Source:NCBI gene (formerly Entrezgene);Acc:832043]	NS	0.641504	NS	NS	NS	1.37236	1.78907	NS	1.43209	2.05325		Yes
AT5G19550	ASP2	aspartate aminotransferase 2 [Source:NCBI gene (formerly Entrezgene);Acc:832075]	NS	NS	NS	NS	NS	0.843895	0.874251	NS	NS	0.7549		Yes	Yes
AT5G20230	BCB	blue-copper-binding protein [Source:NCBI gene (formerly Entrezgene);Acc:832145]	NS	NS	NS	NS	NS	1.80014	2.29152	0.963234	1.84133	2.86067		Yes
AT5G64260	EXL2	EXORDIUM like 2 [Source:NCBI gene (formerly Entrezgene);Acc:836547]	NS	NS	NS	NS	NS	1.43429	1.45364	1.03759	1.29694	1.57729	x	Yes	Yes
GO enrichment analysis
GO-BP
Enrichment FDR	nGenes	Biological Processes	Pathway Genes	Fold Enrichment
0.000436801	2	detection of oxygen	6	279.071
0.000436801	2	detection of hypoxia	6	279.071
0.00099092	2	anaerobic respiration	9	186.047
1.01959e-65	33	response to hypoxia	267	103.476
1.01959e-65	33	response to decreased oxygen levels	271	101.948
7.08017e-52	28	cellular response to hypoxia	240	97.6747
7.08017e-52	28	cellular response to decreased oxygen levels	242	96.8675
0.000116779	5	ethylene-activated signaling pathway	202	20.7231
0.00012803	5	cellular response to ethylene stimulus	209	20.029
1.81077e-33	29	cellular response to stress	1272	19.0874
0.000307594	5	phosphorelay signal transduction system	254	16.4806
1.22513e-35	32	cellular response to chemical stimulus	1791	14.9586
0.000436801	5	response to ethylene	282	14.8442
0.00316273	4	response to nutrient levels	233	14.3727
1.31049e-35	33	response to abiotic stimulus	2170	12.7318
3.52183e-28	32	response to chemical	3091	8.66735
3.84406e-27	33	response to stress	3953	6.98912
GO-MF
Enrichment FDR	nGenes	Molecular Function (MF)	Pathway Genes	Fold Enrichment
0.000663089	2	DNA-binding transcription repressor activity	4	418.606
0.0260303	1	acetolactate synthase activity	3	279.071
0.0260303	1	oxygen carrier activity	3	279.071
0.036667	1	cysteine dioxygenase activity	5	167.442
0.036667	1	oxygen binding	5	167.442
0.0418932	1	acyl-[acyl-carrier-protein] desaturase activity	7	119.602
0.0418932	1	stearoyl-[acp] desaturase activity	7	119.602
0.0422972	1	L-aspartate:2-oxoglutarate aminotransferase activity	8	104.652
0.0450538	1	AMP binding	9	93.0236
0.0120041	3	kinase binding	142	17.6876
0.0418932	2	protein self-association	119	14.0708
0.0120041	6	transcription cis-regulatory region binding	979	5.13102
0.0120041	6	transcription regulatory region nucleic acid binding	979	5.13102
0.0120041	6	sequence-specific double-stranded DNA binding	998	5.03334
0.00412835	9	DNA-binding transcription factor activity	1660	4.5391
0.018274	6	double-stranded DNA binding	1112	4.51733
0.00540381	9	transcription regulator activity	1814	4.15375
0.0260303	6	sequence-specific DNA binding	1270	3.95533
0.0418932	8	DNA binding	2528	2.64941
GO-CC
Enrichment FDR	nGenes	Cellular Component	Pathway Genes	Fold Enrichment
NS
Transcription factor enrichment analysis
TF-AGRIS
Enrichment FDR	nGenes	Transcription Factor Binding Sites	Pathway Genes	Fold Enrichment
1.6e-06	10	ATBHLH15 target	749	11.2
			Root	adc1-R	OXPtADC-R	cdr7/cuao3-R	OXCuAO3-R	Shoot	adc1-S	OXPtADC-S	cdr7/cuao3-S	OXCuAO3-S
TF target	Gene ID	Annotation	Col	adc1	OXPtADC	cdr7/cuao3	OXCuAO3	Col	adc1	OXPtADC	cdr7/cuao3	OXCuAO3
ATBHLH15 target
AT1G25550	AT1G25550	myb-like transcription factor family protein; CONTAINS InterPro DOMAIN/s: Homeodomain-like (InterPro:IPR009057), Myb, DNA-binding (InterPro:IPR014778), Myb-like DNA-binding domain, SHAQKYF class (InterPro:IPR006447), HTH transcriptional regulator, Myb-type, DNA-binding (InterPro:IPR017930), Homeodomain-related (InterPro:IPR012287); BEST Arabidopsis thaliana protein match is: myb-like transcriptio…	NS	NS	NS	NS	NS	0.688647	0.984733	0.916165	0.988444	1.01431
AT1G68670	AT1G68670	myb-like transcription factor family protein; CONTAINS InterPro DOMAIN/s: Homeodomain-like (InterPro:IPR009057), Myb, DNA-binding (InterPro:IPR014778), HTH transcriptional regulator, Myb-type, DNA-binding (InterPro:IPR017930), Myb-like DNA-binding domain, SHAQKYF class (InterPro:IPR006447), Homeodomain-related (InterPro:IPR012287); BEST Arabidopsis thaliana protein match is: myb-like transcriptio…	NS	NS	NS	NS	NS	0.405206	0.753187	NS	NS	0.694127
AT1G69890	AT1G69890	CONTAINS InterPro DOMAIN/s: Protein of unknown function DUF569 (InterPro:IPR007679), Actin cross-linking (InterPro:IPR008999); BEST Arabidopsis thaliana protein match is: Actin cross-linking protein (TAIR:AT1G27100.1); Has 237 Blast hits to 216 proteins in 14 species: Archae - 0; Bacteria - 0; Metazoa - 0; Fungi - 0; Plants - 237; Viruses - 0; Other Eukaryotes - 0 (source: NCBI BLink).	NS	NS	NS	NS	0.604577	1.15526	2.12328	NS	NS	2.3313
AT1G74940	AT1G74940	Protein of unknown function (DUF581); CONTAINS InterPro DOMAIN/s: Protein of unknown function DUF581 (InterPro:IPR007650); BEST Arabidopsis thaliana protein match is: Protein of unknown function (DUF581) (TAIR:AT1G19200.1); Has 483 Blast hits to 483 proteins in 20 species: Archae - 0; Bacteria - 0; Metazoa - 0; Fungi - 0; Plants - 483; Viruses - 0; Other Eukaryotes - 0 (source: NCBI BLink).	NS	NS	NS	NS	NS	0.687163	0.793888	1.2759	0.473168	1.23283
AT3G10020	AT3G10020	unknown protein; FUNCTIONS IN: molecular_function unknown; INVOLVED IN: response to oxidative stress, anaerobic respiration; LOCATED IN: cellular_component unknown; EXPRESSED IN: 23 plant structures; EXPRESSED DURING: 13 growth stages; Has 47 Blast hits to 47 proteins in 12 species: Archae - 0; Bacteria - 0; Metazoa - 1; Fungi - 0; Plants - 46; Viruses - 0; Other Eukaryotes - 0 (source: NCBI BLin…	NS	NS	NS	0.783355	NS	1.00945	1.57589	1.19144	1.02209	1.88279
AT3G13310	AT3G13310	Chaperone DnaJ-domain superfamily protein; FUNCTIONS IN: unfolded protein binding, heat shock protein binding; INVOLVED IN: protein folding; EXPRESSED IN: 23 plant structures; EXPRESSED DURING: 13 growth stages; CONTAINS InterPro DOMAIN/s: Molecular chaperone, heat shock protein, Hsp40, DnaJ (InterPro:IPR015609), Heat shock protein DnaJ, N-terminal (InterPro:IPR001623), Heat shock protein DnaJ (I…	NS	NS	NS	NS	NS	0.810835	1.25501	NS	0.729939	1.28915
RAP2.2	AT3G14230	related to AP2 2 (RAP2.2); CONTAINS InterPro DOMAIN/s: DNA-binding, integrase-type (InterPro:IPR016177), Pathogenesis-related transcriptional factor/ERF, DNA-binding (InterPro:IPR001471); BEST Arabidopsis thaliana protein match is: related to AP2 12 (TAIR:AT1G53910.2); Has 6244 Blast hits to 5852 proteins in 259 species: Archae - 0; Bacteria - 2; Metazoa - 0; Fungi - 0; Plants - 6195; Viruses - 4…	NS	NS	NS	NS	NS	1.11461	1.13957	1.13168	1.35968	1.28
ERD5	AT3G30775	EARLY RESPONSIVE TO DEHYDRATION 5 (ERD5); CONTAINS InterPro DOMAIN/s: Proline dehydrogenase (InterPro:IPR002872), Proline oxidase (InterPro:IPR015659); BEST Arabidopsis thaliana protein match is: Methylenetetrahydrofolate reductase family protein (TAIR:AT5G38710.1); Has 2269 Blast hits to 2250 proteins in 878 species: Archae - 1; Bacteria - 1355; Metazoa - 205; Fungi - 217; Plants - 85; Viruses -…	NS	0.56469	NS	0.950869	0.717196	1.58913	1.45643	0.994224	1.68695	1.21063
CBSX5	AT4G27460	Cystathionine beta-synthase (CBS) family protein; CONTAINS InterPro DOMAIN/s: Cystathionine beta-synthase, core (InterPro:IPR000644); BEST Arabidopsis thaliana protein match is: CBS domain-containing protein (TAIR:AT5G53750.1); Has 145 Blast hits to 145 proteins in 17 species: Archae - 0; Bacteria - 0; Metazoa - 1; Fungi - 0; Plants - 144; Viruses - 0; Other Eukaryotes - 0 (source: NCBI BLink).	NS	NS	NS	NS	1.04837	1.90535	2.2183	2.59816	2.78151	3.18452
EXL2	AT5G64260	EXORDIUM like 2 (EXL2); FUNCTIONS IN: molecular_function unknown; INVOLVED IN: biological_process unknown; LOCATED IN: cell wall, plant-type cell wall; EXPRESSED IN: 23 plant structures; EXPRESSED DURING: 13 growth stages; CONTAINS InterPro DOMAIN/s: Phosphate-induced protein 1 (InterPro:IPR006766); BEST Arabidopsis thaliana protein match is: EXORDIUM like 4 (TAIR:AT5G09440.1); Has 1807 Blast hit…	NS	NS	NS	NS	NS	1.43429	1.45364	1.03759	1.29694	1.57729
HRPE Elements*
AT1G53910**	RAP2.12	Uncharacterized protein	NS	NS	NS	NS	NS	0.381382	0.419751	NS	0.32968	0.34842
AT1G66180**	AT1G66180	Eukaryotic aspartyl protease family protein	NS	NS	NS	NS	NS	1.18854	0.916195	1.20814	1.23998	0.91622
AT1G68670**	AT1G68670	Myb-like transcription factor family protein	NS	NS	NS	NS	NS	0.405206	0.753187	NS	NS	0.694127
AT2G31810**	AT2G31810	ACT domain-containing small subunit of acetolactate synthase protein	NS	0.615988	NS	0.544967	0.627992	1.72102	1.58756	1.36712	1.94088	1.76718
AT2G41430**	ERD15	Dehydration-induced protein (ERD15)	NS	NS	NS	NS	NS	0.674625	0.88869	NS	0.818065	1.13292
AT3G10040**	AT3G10040	Sequence-specific DNA binding transcription factor	NS	NS	NS	NS	NS	2.37213	2.70588	2.16516	2.49919	2.03262
AT3G14230**	RAP2.2	Uncharacterized protein	NS	NS	NS	NS	NS	1.11461	1.13957	1.13168	1.35968	1.28
AT3G27220**	AT3G27220	Galactose oxidase/kelch repeat superfamily protein	NS	NS	NS	NS	NS	1.54738	2.03203	1.31535	1.63465	1.77216
AT3G58670**	AT3G58670	2-aminoethanethiol dioxygenase, putative (DUF1637)	NS	NS	NS	NS	NS	NS	NS	NS	NS	0.871999
AT4G33560**	AT4G33560	Wound-responsive family protein	NS	NS	NS	NS	NS	1.06781	NS	NS	NS	NS
AT5G19550**	ASP2	Aspartate aminotransferase 2	NS	NS	NS	NS	NS	0.843895	0.874251	NS	NS	0.7549
AT5G64260**	EXL2	EXORDIUM like 2	NS	NS	NS	NS	NS	1.43429	1.45364	1.03759	1.29694	1.57729
*. Presence of HRPE elements as defined by Zubrycka et al. Nature Commun 14: 4665
**. Genes bound by HRE2 in ChIP (Zubrycka et al (2023) Nature Commun 14: 4665

## Sheet: Group VII-h
GO- and Transcription Factor- Enrichment analyses of group-VIIh genes
Gene Annotation			Root					Shoot
Gene ID	Symbol	Description	Col	adc1	OXPtADC	cdr7/cuao3	OXCuAO3	Col	adc1	OXPtADC	cdr7/cuao3	OXCuAO3
AT1G15010	AT1G15010	mediator of RNA polymerase II transcription subunit [Source:NCBI gene (formerly Entrezgene);Acc:838066]	-1.35017	NS	NS	NS	NS	1.35693	1.99278	NS	2.0873	2.35912
AT1G26270	AT1G26270	Phosphatidylinositol 3- and 4-kinase family protein [Source:NCBI gene (formerly Entrezgene);Acc:839168]	-0.332073	NS	NS	NS	NS	0.745129	0.782472	NS	0.436731	0.692753
AT1G35140	PHI-1	Phosphate-responsive 1 family protein [Source:NCBI gene (formerly Entrezgene);Acc:840399]	-2.11121	-1.11735	NS	-1.99237	-1.60218	0.877158	NS	NS	NS	1.10858
AT4G01250	WRKY22	WRKY family transcription factor [Source:NCBI gene (formerly Entrezgene);Acc:827896]	-1.21913	NS	NS	NS	NS	0.786427	1.52756	NS	1.3507	1.47953
AT4G30280	XTH18	xyloglucan endotransglucosylase/hydrolase 18 [Source:NCBI gene (formerly Entrezgene);Acc:829151]	-0.660734	NS	NS	NS	NS	0.708203	1.83548	NS	NS	1.86262
AT5G26920	CBP60G	Cam-binding protein 60-like G [Source:NCBI gene (formerly Entrezgene);Acc:832750]	0.909058	1.95645	NS	NS	1.04666	-1.03722	NS	-1.02305	NS	NS
AT5G66985	AT5G66985		-0.491848	NS	NS	NS	NS	1.73355	NS	NS	NS	NS
GO enrichment analysis
GO-BP
Enrichment FDR	nGenes	Biological Process (BP)	Pathway Genes	Fold Enrichment
0.0383336	1	cellular response to molecule of bacterial origin	11	358.805
0.0452886	1	reg. of salicylic acid biosynthetic proc.	14	281.918
2.16419e-13	7	cellular response to hypoxia	240	115.117
2.16419e-13	7	cellular response to decreased oxygen levels	242	114.165
2.4761e-13	7	response to hypoxia	267	103.476
2.4761e-13	7	response to oxygen levels	272	101.574
1.10374e-08	7	cellular response to stress	1272	21.7201
1.06468e-07	7	cellular response to chemical stimulus	1791	15.426
3.63501e-07	7	response to abiotic stimulus	2170	12.7318
3.90371e-06	7	response to chemical	3091	8.93821
1.82278e-05	7	response to stress	3953	6.98912
GO-MF
Enrichment FDR	nGenes	Molecular Function (MF)	Pathway Genes	Fold Enrichment
NS
GO-CC
Enrichment FDR	nGenes	Cellular Component (CC)	Pathway Genes	Fold Enrichment
0.0162791	2	cell wall	421	18.7499
0.0162791	2	external encapsulating structure	450	17.5416
0.0162791	2	apoplast	457	17.2729
Transcription factor enrichment analysis
TF-AGRIS
Enrichment FDR	nGenes	Transcription Factor Binding Sites	Pathway Genes	Fold Enrichment
0.00537772	5	CAMTA1 target	2295	8.59882
			Root	adc1-R	OXPtADC-R	cdr7/cuao3-R	OXCuAO3-R	Shoot	adc1-S	OXPtADC-S	cdr7/cuao3-S	OXCuAO3-S
TF target	Gene ID	Annotation	Col	adc1	OXPtADC	cdr7/cuao3	OXCuAO3	Col	adc1	OXPtADC	cdr7/cuao3	OXCuAO3
CAMTA1 target
AT1G15010	AT1G15010	unknown protein; BEST Arabidopsis thaliana protein match is: unknown protein (TAIR:AT2G01300.1); Has 71 Blast hits to 71 proteins in 13 species: Archae - 0; Bacteria - 2; Metazoa - 0; Fungi - 0; Plants - 69; Viruses - 0; Other Eukaryotes - 0 (source: NCBI BLink).	-1.35017	NS	NS	NS	NS	1.35693	1.99278	NS	2.0873	2.35912
AT1G26270	AT1G26270	Phosphatidylinositol 3- and 4-kinase family protein; FUNCTIONS IN: inositol or phosphatidylinositol kinase activity, phosphotransferase activity, alcohol group as acceptor; LOCATED IN: cellular_component unknown; EXPRESSED IN: 23 plant structures; EXPRESSED DURING: 13 growth stages; CONTAINS InterPro DOMAIN/s: Phosphatidylinositol 3-/4-kinase, catalytic (InterPro:IPR000403); BEST Arabidopsis thal…	-0.332073	NS	NS	NS	NS	0.745129	0.782472	NS	0.436731	0.692753
PHI-1	AT1G35140	PHOSPHATE-INDUCED 1 (PHI-1); CONTAINS InterPro DOMAIN/s: Phosphate-induced protein 1 (InterPro:IPR006766); BEST Arabidopsis thaliana protein match is: Phosphate-responsive 1 family protein (TAIR:AT4G08950.1); Has 400 Blast hits to 400 proteins in 24 species: Archae - 0; Bacteria - 2; Metazoa - 0; Fungi - 0; Plants - 398; Viruses - 0; Other Eukaryotes - 0 (source: NCBI BLink).	-2.11121	-1.11735	NS	-1.99237	-1.60218	0.877158	NS	NS	NS	1.10858
WRKY22	AT4G01250	WRKY22; CONTAINS InterPro DOMAIN/s: DNA-binding WRKY (InterPro:IPR003657); BEST Arabidopsis thaliana protein match is: WRKY family transcription factor (TAIR:AT4G23550.1); Has 3274 Blast hits to 2836 proteins in 187 species: Archae - 0; Bacteria - 0; Metazoa - 0; Fungi - 3; Plants - 3256; Viruses - 0; Other Eukaryotes - 15 (source: NCBI BLink).	-1.21913	NS	NS	NS	NS	0.786427	1.52756	NS	1.3507	1.47953
CBP60G	AT5G26920	Cam-binding protein 60-like G (CBP60G); CONTAINS InterPro DOMAIN/s: Calmodulin binding protein-like (InterPro:IPR012416); BEST Arabidopsis thaliana protein match is: Calmodulin-binding protein (TAIR:AT4G25800.2); Has 271 Blast hits to 271 proteins in 14 species: Archae - 0; Bacteria - 0; Metazoa - 0; Fungi - 0; Plants - 271; Viruses - 0; Other Eukaryotes - 0 (source: NCBI BLink).	0.909058	1.95645	NS	NS	1.04666	-1.03722	NS	-1.02305	NS	NS
