# Supplementary material
Source: Research Square preprint supplement (doi:10.21203/rs.3.rs-9349369/v1)
Supplement: Supplementary file 8 [file 5f1f002ed103808ca4caba44.xlsx]

## Sheet: Supplemental table S9
Supplemental table S9. Lists of Col DEGs associated with GO:0015979 (Photosynthesis). These DEGs were clustered based on their relative expressions in shoots and roots. Organ-specific expression responses to spaceflight conditions are shown for the 5 genotypes included in APEX08. The results of GO- and transcription-factor target enrichment analyses are also shown in this spreadsheet. NS represen…
	Log2FC
Gene ID	Col-Root	Col-Shoot	Symbol	Annotation
AT3G60750	-0.542207	-0.67971	AT3G60750	Transketolase [Source:NCBI gene (formerly Entrezgene);Acc:825246]
AT4G04640	-0.691073	-0.787832	ATPC1	ATPase, F1 complex, gamma subunit protein [Source:NCBI gene (formerly Entrezgene);Acc:825797]
AT4G09650	-0.544915	-1.29868	ATPD	F-type H+-transporting ATPase subunit delta [Source:NCBI gene (formerly Entrezgene);Acc:826551]
AT1G29930	-0.831617	-0.883642	CAB1	chlorophyll A/B binding protein 1 [Source:NCBI gene (formerly Entrezgene);Acc:839871]
AT1G29910	-3.86669	-1.27798	CAB3	chlorophyll A/B binding protein 3 [Source:NCBI gene (formerly Entrezgene);Acc:839869]
AT1G60950	-0.738206	-0.763954	FED A	2Fe-2S ferredoxin-like superfamily protein [Source:NCBI gene (formerly Entrezgene);Acc:842386]
AT1G20020	-1.53893	-0.788816	FNR2	ferredoxin-NADP[+]-oxidoreductase 2 [Source:NCBI gene (formerly Entrezgene);Acc:838591]
AT1G50250	-0.896549	-0.510999	FTSH1	FTSH protease 1 [Source:NCBI gene (formerly Entrezgene);Acc:841447]
AT1G12900	-0.882463	-1.05345	GAPA-2	glyceraldehyde 3-phosphate dehydrogenase A subunit 2 [Source:NCBI gene (formerly Entrezgene);Acc:837848]
AT1G42970	-0.652758	-0.72059	GAPB	glyceraldehyde-3-phosphate dehydrogenase B subunit [Source:NCBI gene (formerly Entrezgene);Acc:840895]
AT1G16720	-0.815163	-0.904159	HCF173	high chlorophyll fluorescence phenotype 173 [Source:NCBI gene (formerly Entrezgene);Acc:838243]
AT2G34420	-2.56047	-0.919806	LHB1B2	photosystem II light harvesting complex protein B1B2 [Source:NCBI gene (formerly Entrezgene);Acc:818005]
AT3G54890	-1.67604	-1.05025	LHCA1	chlorophyll a-b binding protein 6 [Source:NCBI gene (formerly Entrezgene);Acc:824654]
AT3G61470	-0.56417	-0.596238	LHCA2	photosystem I light harvesting complex protein [Source:NCBI gene (formerly Entrezgene);Acc:825320]
AT1G61520	-1.24202	-0.702557	LHCA3	PSI type III chlorophyll a/b-binding protein [Source:NCBI gene (formerly Entrezgene);Acc:842446]
AT3G47470	-1.89048	-0.775864	LHCA4	light-harvesting chlorophyll-protein complex I subunit A4 [Source:NCBI gene (formerly Entrezgene);Acc:823901]
AT2G05100	-2.58868	-2.29777	LHCB2.1	photosystem II light harvesting complex protein 2.1 [Source:NCBI gene (formerly Entrezgene);Acc:815058]
AT3G27690	-3.82898	-2.25274	LHCB2.3	photosystem II light harvesting complex protein 2.3 [Source:NCBI gene (formerly Entrezgene);Acc:822391]
AT5G54270	-2.30084	-1.50951	LHCB3	light-harvesting chlorophyll B-binding protein 3 [Source:NCBI gene (formerly Entrezgene);Acc:835515]
AT5G01530	-0.798801	-0.720532	LHCB4.1	light harvesting complex photosystem II [Source:NCBI gene (formerly Entrezgene);Acc:830325]
AT3G08940	-0.827872	-0.660286	LHCB4.2	light harvesting complex photosystem II [Source:NCBI gene (formerly Entrezgene);Acc:820043]
AT4G10340	-0.791437	-0.716828	LHCB5	light harvesting complex of photosystem II 5 [Source:NCBI gene (formerly Entrezgene);Acc:826626]
AT1G15820	-1.82839	-1.41315	LHCB6	light harvesting complex photosystem II subunit 6 [Source:NCBI gene (formerly Entrezgene);Acc:838151]
AT1G75690	-1.59477	-0.674183	LQY1	DnaJ/Hsp40 cysteine-rich domain superfamily protein [Source:NCBI gene (formerly Entrezgene);Acc:843903]
AT5G57030	-0.904276	-1.08847	LUT2	Lycopene beta/epsilon cyclase protein [Source:NCBI gene (formerly Entrezgene);Acc:835806]
ATCG00440	-0.4083	-0.504446	ndhC
ATCG01010	-0.319446	-0.596653	ndhF
AT4G03280	-0.645954	-0.528898	PETC	photosynthetic electron transfer C [Source:NCBI gene (formerly Entrezgene);Acc:827996]
AT3G12780	-0.399866	-0.786709	PGK1	phosphoglycerate kinase 1 [Source:NCBI gene (formerly Entrezgene);Acc:820461]
AT2G05620	-0.975408	-0.699184	PGR5	proton gradient regulation 5 [Source:NCBI gene (formerly Entrezgene);Acc:815111]
AT1G32060	-0.923686	-0.779435	PRK	phosphoribulokinase [Source:NCBI gene (formerly Entrezgene);Acc:840098]
AT1G08380	-0.905774	-1.20832	PSAO	photosystem I subunit O [Source:NCBI gene (formerly Entrezgene);Acc:837358]
AT2G20890	-0.382716	-0.896477	PSB29	photosystem II reaction center PSB29 protein [Source:NCBI gene (formerly Entrezgene);Acc:816623]
AT5G66570	-0.846863	-0.733041	PSBO1	PS II oxygen-evolving complex 1 [Source:NCBI gene (formerly Entrezgene);Acc:836789]
AT3G50820	-0.823048	-0.754887	PSBO2	photosystem II subunit O-2 [Source:NCBI gene (formerly Entrezgene);Acc:824246]
AT1G06680	-1.53399	-1.0177	PSBP-1	photosystem II subunit P-1 [Source:NCBI gene (formerly Entrezgene);Acc:837178]
AT4G21280	-0.622813	-1.14352	PSBQA	photosystem II subunit QA [Source:NCBI gene (formerly Entrezgene);Acc:827877]
AT1G79040	-0.842999	-0.632762	PSBR	photosystem II subunit R [Source:NCBI gene (formerly Entrezgene);Acc:844245]
AT1G67740	-2.07458	-0.834424	PSBY	photosystem II BY [Source:NCBI gene (formerly Entrezgene);Acc:843099]
AT1G67090	-0.65037	-0.781581	RBCS1A	ribulose bisphosphate carboxylase small chain 1A [Source:NCBI gene (formerly Entrezgene);Acc:843029]
AT3G55800	-1.38745	-0.709225	SBPASE	sedoheptulose-bisphosphatase [Source:NCBI gene (formerly Entrezgene);Acc:824746]
AT2G21970	-0.823453	-0.930402	SEP2	stress enhanced protein 2 [Source:NCBI gene (formerly Entrezgene);Acc:816733]
AT5G24120	-2.05192	-2.12913	SIGE	sigma factor E [Source:NCBI gene (formerly Entrezgene);Acc:832477]
AT1G27730	-1.23227	-1.02375	STZ	salt tolerance zinc finger [Source:NCBI gene (formerly Entrezgene);Acc:839666]
AT4G01050	-0.439278	-0.468241	TROL	thylakoid rhodanese-like protein [Source:NCBI gene (formerly Entrezgene);Acc:827921]
AT5G42270	-0.861396	-0.665036	VAR1	FtsH extracellular protease family [Source:NCBI gene (formerly Entrezgene);Acc:834232]
AT2G30950	-0.696291	-0.650047	VAR2	FtsH extracellular protease family [Source:NCBI gene (formerly Entrezgene);Acc:817646]
AT5G01600	-0.440995	1.38444	FER1	ferretin 1 [Source:NCBI gene (formerly Entrezgene);Acc:831720]
AT2G05070	N.S.	-2.02179	LHCB2.2	photosystem II light harvesting complex protein 2.2 [Source:NCBI gene (formerly Entrezgene);Acc:815055]
AT1G29920	N.S.	-1.84739	CAB2	chlorophyll A/B-binding protein 2 [Source:NCBI gene (formerly Entrezgene);Acc:839870]
AT3G16250	N.S.	-1.62761	PnsB3	NDH-dependent cyclic electron flow 1 [Source:NCBI gene (formerly Entrezgene);Acc:820871]
AT3G01440	N.S.	-1.42143	PnsL3	PsbQ-like 1 [Source:NCBI gene (formerly Entrezgene);Acc:821143]
AT1G15980	N.S.	-1.41197	PnsB1	NDH-dependent cyclic electron flow 1 [Source:NCBI gene (formerly Entrezgene);Acc:838168]
AT1G60600	N.S.	-1.2887	ABC4	UbiA prenyltransferase family protein [Source:NCBI gene (formerly Entrezgene);Acc:842354]
AT3G04790	N.S.	-1.2786	EMB3119	Ribose 5-phosphate isomerase, type A protein [Source:NCBI gene (formerly Entrezgene);Acc:819639]
AT1G55480	N.S.	-1.27348	ZKT	protein containing PDZ domain, a K-box domain, and a TPR region [Source:NCBI gene (formerly Entrezgene);Acc:841995]
AT1G19150	N.S.	-1.23739	Lhca6	PSI type II chlorophyll a/b-binding protein (Lhca2*1) [Source:NCBI gene (formerly Entrezgene);Acc:838498]
AT2G01918	N.S.	-1.20953	PQL3	PsbQ-like 3 [Source:NCBI gene (formerly Entrezgene);Acc:3768499]
AT4G15510	N.S.	-1.16059	PPD1	Photosystem II reaction center PsbP family protein [Source:NCBI gene (formerly Entrezgene);Acc:827223]
AT2G34430	N.S.	-1.14452	LHB1B1	light-harvesting chlorophyll-protein complex II subunit B1 [Source:NCBI gene (formerly Entrezgene);Acc:818006]
AT5G49740	N.S.	-1.12221	FRO7	ferric reduction oxidase 7 [Source:NCBI gene (formerly Entrezgene);Acc:835037]
AT2G01590	N.S.	-1.11483	CRR3	chlororespiratory reduction 3 [Source:NCBI gene (formerly Entrezgene);Acc:814688]
AT5G39830	N.S.	-1.09611	DEG8	Trypsin family protein with PDZ domain-containing protein [Source:NCBI gene (formerly Entrezgene);Acc:833979]
AT5G35220	N.S.	-1.08783	EGY1	Peptidase M50 family protein [Source:NCBI gene (formerly Entrezgene);Acc:833476]
AT1G77090	N.S.	-1.08722	AT1G77090	thylakoid lumenal protein (Mog1/PsbP/DUF1795-like photosystem II reaction center PsbP family protein) [Source:NCBI gene (formerly Entrezgene);Acc:844043]
AT5G66190	N.S.	-1.0821	FNR1	ferredoxin-NADP[+]-oxidoreductase 1 [Source:NCBI gene (formerly Entrezgene);Acc:836751]
AT4G35250	N.S.	-1.04869	HCF244	NAD(P)-binding Rossmann-fold superfamily protein [Source:NCBI gene (formerly Entrezgene);Acc:829678]
AT4G02530	N.S.	-1.04684	AT4G02530	chloroplast thylakoid lumen protein [Source:NCBI gene (formerly Entrezgene);Acc:827927]
AT1G70760	N.S.	-1.03521	NdhL	inorganic carbon transport protein-like protein [Source:NCBI gene (formerly Entrezgene);Acc:843413]
AT1G64770	N.S.	-1.03006	PnsB2	NDH-dependent cyclic electron flow 1 [Source:NCBI gene (formerly Entrezgene);Acc:842785]
AT5G44650	N.S.	-1.028	CEST	death domain associated protein [Source:NCBI gene (formerly Entrezgene);Acc:834494]
AT2G15820	N.S.	-1.02231	OTP51	endonuclease [Source:NCBI gene (formerly Entrezgene);Acc:816078]
AT1G14150	N.S.	-1.00128	PnsL2	PsbQ-like 2 [Source:NCBI gene (formerly Entrezgene);Acc:837974]
AT2G46820	N.S.	-0.976648	PSI-P	photosystem I P subunit [Source:NCBI gene (formerly Entrezgene);Acc:819295]
AT2G28605	N.S.	-0.974056	AT2G28605	Photosystem II reaction center PsbP family protein [Source:NCBI gene (formerly Entrezgene);Acc:817409]
AT5G54180	N.S.	-0.962129	PTAC15	plastid transcriptionally active 15 [Source:NCBI gene (formerly Entrezgene);Acc:835506]
AT4G22890	N.S.	-0.939207	PGR5-LIKE A	PGR5-LIKE A [Source:NCBI gene (formerly Entrezgene);Acc:828388]
AT1G54780	N.S.	-0.938911	TLP18.3	thylakoid lumen 18.3 kDa protein [Source:NCBI gene (formerly Entrezgene);Acc:841919]
AT1G45474	N.S.	-0.919276	Lhca5	photosystem I light harvesting complex protein 5 [Source:NCBI gene (formerly Entrezgene);Acc:841099]
AT5G02120	N.S.	-0.915721	OHP	one helix protein [Source:NCBI gene (formerly Entrezgene);Acc:831799]
AT1G18730	N.S.	-0.906498	PnsB4	NDH dependent flow 6 [Source:NCBI gene (formerly Entrezgene);Acc:838455]
AT3G27925	N.S.	-0.905944	DEG1	DegP protease 1 [Source:NCBI gene (formerly Entrezgene);Acc:822416]
AT3G58830	N.S.	-0.887207	AT3G58830	haloacid dehalogenase (HAD) superfamily protein [Source:NCBI gene (formerly Entrezgene);Acc:825052]
AT5G38410	N.S.	-0.874803	RBCS3B	Ribulose bisphosphate carboxylase (small chain) family protein [Source:NCBI gene (formerly Entrezgene);Acc:833828]
AT3G55250	N.S.	-0.842821	PDE329	calcium homeostasis regulator [Source:NCBI gene (formerly Entrezgene);Acc:824691]
AT2G39470	N.S.	-0.82778	PnsL1	PsbP-like protein 2 [Source:NCBI gene (formerly Entrezgene);Acc:818532]
AT5G64040	N.S.	-0.821696	PSAN	photosystem I reaction center subunit PSI-N, chloroplast, putative / PSI-N, putative (PSAN) [Source:NCBI gene (formerly Entrezgene);Acc:836525]
AT3G21200	N.S.	-0.821	PGR7	proton gradient regulation 7 [Source:NCBI gene (formerly Entrezgene);Acc:821673]
AT3G01480	N.S.	-0.800186	CYP38	cyclophilin 38 [Source:NCBI gene (formerly Entrezgene);Acc:821137]
AT1G55370	N.S.	-0.795386	NDF5	NDH-dependent cyclic electron flow 5 [Source:NCBI gene (formerly Entrezgene);Acc:841984]
AT1G20950	N.S.	-0.779858	AT1G20950	Phosphofructokinase family protein [Source:NCBI gene (formerly Entrezgene);Acc:838689]
AT3G54050	N.S.	-0.732416	HCEF1	high cyclic electron flow 1 [Source:NCBI gene (formerly Entrezgene);Acc:824572]
AT2G34860	N.S.	-0.729282	EDA3	DnaJ/Hsp40 cysteine-rich domain superfamily protein [Source:NCBI gene (formerly Entrezgene);Acc:818051]
AT4G33520	N.S.	-0.725663	PAA1	P-type ATP-ase 1 [Source:NCBI gene (formerly Entrezgene);Acc:829490]
AT5G08410	N.S.	-0.688957	FTRA2	ferredoxin/thioredoxin reductase subunit A (variable subunit) 2 [Source:NCBI gene (formerly Entrezgene);Acc:830739]
AT1G73060	N.S.	-0.667791	LPA3	Low PSII Accumulation 3 [Source:NCBI gene (formerly Entrezgene);Acc:843637]
AT2G40100	N.S.	-0.642705	LHCB4.3	light harvesting complex photosystem II [Source:NCBI gene (formerly Entrezgene);Acc:818599]
AT1G56190	N.S.	-0.622873	AT1G56190	Phosphoglycerate kinase family protein [Source:NCBI gene (formerly Entrezgene);Acc:842072]
AT1G03600	N.S.	-0.621885	PSB27	photosystem II family protein [Source:NCBI gene (formerly Entrezgene);Acc:839449]
AT3G56650	N.S.	-0.616684	PPD6	thylakoid lumenal protein (Mog1/PsbP/DUF1795-like photosystem II reaction center PsbP family protein) [Source:NCBI gene (formerly Entrezgene);Acc:824832]
AT2G31040	N.S.	-0.613662	AT2G31040	ATP synthase protein I-like protein [Source:NCBI gene (formerly Entrezgene);Acc:817656]
AT2G47940	N.S.	-0.609867	DEG2	DEGP protease 2 [Source:NCBI gene (formerly Entrezgene);Acc:819406]
AT2G45770	N.S.	-0.598861	CPFTSY	signal recognition particle receptor protein, chloroplast (FTSY) [Source:NCBI gene (formerly Entrezgene);Acc:819185]
AT3G55330	N.S.	-0.589624	PPL1	PsbP-like protein 1 [Source:NCBI gene (formerly Entrezgene);Acc:824699]
AT1G11750	N.S.	-0.571695	CLPP6	CLP protease proteolytic subunit 6 [Source:NCBI gene (formerly Entrezgene);Acc:837719]
AT4G05180	N.S.	-0.566285	PSBQ-2	photosystem II subunit Q-2 [Source:NCBI gene (formerly Entrezgene);Acc:825866]
AT3G60370	N.S.	-0.554169	AT3G60370	FKBP-like peptidyl-prolyl cis-trans isomerase family protein [Source:NCBI gene (formerly Entrezgene);Acc:825208]
AT4G01037	N.S.	-0.552762	WTF1	Ubiquitin carboxyl-terminal hydrolase family protein [Source:NCBI gene (formerly Entrezgene);Acc:6240517]
AT1G76450	N.S.	-0.542212	AT1G76450	Photosystem II reaction center PsbP family protein [Source:NCBI gene (formerly Entrezgene);Acc:843978]
AT1G43670	N.S.	-0.527894	FBP	Inositol monophosphatase family protein [Source:NCBI gene (formerly Entrezgene);Acc:840953]
AT4G19100	N.S.	-0.516919	PAM68	PAM68-like protein (DUF3464) [Source:NCBI gene (formerly Entrezgene);Acc:2745715]
AT4G02260	N.S.	-0.512912	RSH1	RELA/SPOT homolog 1 [Source:NCBI gene (formerly Entrezgene);Acc:828096]
AT1G22700	N.S.	-0.498726	AT1G22700	Tetratricopeptide repeat (TPR)-like superfamily protein [Source:NCBI gene (formerly Entrezgene);Acc:838876]
AT3G01500	N.S.	-0.498253	CA1	carbonic anhydrase 1 [Source:NCBI gene (formerly Entrezgene);Acc:821134]
AT5G61410	N.S.	-0.403629	RPE	D-ribulose-5-phosphate-3-epimerase [Source:NCBI gene (formerly Entrezgene);Acc:836262]
AT1G54500	N.S.	-0.393695	AT1G54500	Rubredoxin-like superfamily protein [Source:NCBI gene (formerly Entrezgene);Acc:841892]
AT5G21930	N.S.	0.420724	PAA2	P-type ATPase of Arabidopsis 2 [Source:NCBI gene (formerly Entrezgene);Acc:832253]
ATCG00700	N.S.	0.454119	psbN
AT2G45290	N.S.	0.557985	AT2G45290	Transketolase [Source:NCBI gene (formerly Entrezgene);Acc:819137]
AT3G56090	N.S.	0.674996	FER3	ferritin 3 [Source:NCBI gene (formerly Entrezgene);Acc:824775]
ATCG00520	-0.273184	N.S.	ycf4
ATCG00080	-0.351025	N.S.	psbI
ATCG00690	-0.400372	N.S.	psbT
ATCG00540	-0.40288	N.S.	petA
AT2G18790	-0.408849	N.S.	PHYB	phytochrome B [Source:NCBI gene (formerly Entrezgene);Acc:816394]
ATCG00680	-0.441077	N.S.	psbB
ATCG00280	-0.443793	N.S.	psbC
ATCG00270	-0.528923	N.S.	psbD
ATCG00350	-0.608583	N.S.	psaA
AT1G34000	-0.614177	N.S.	OHP2	one-helix protein 2 [Source:NCBI gene (formerly Entrezgene);Acc:840297]
ATCG00340	-0.642579	N.S.	psaB
AT4G04040	0.91544	N.S.	MEE51	Phosphofructokinase family protein [Source:NCBI gene (formerly Entrezgene);Acc:825716]
ATCG00360	0.320944	N.S.

## Sheet: R+S
Supplemental table S9. Lists of Col DEGs associated with GO:0015979 (Photosynthesis). These DEGs were clustered based on their relative expressions in shoots and roots. Organ-specific expression responses to spaceflight conditions are shown for the 5 genotypes included in APEX08. The results of GO- and transcription-factor target enrichment analyses are also shown in this spreadsheet. NS represen…					DEG Expcression log2 FC (FL/GC)
	Log2FC				Root	adc1-R	OXPtADC-R	cdr7/cuao3-R	OXCuAO3-R	Shoot	adc1-S	OXPtADC-S	cdr7/cuao3-S	OXCuAO3-S	TF enrichment											Annotation
Gene ID	Col-Root	Col-Shoot	Symbol	Annotation	Col	adc1	OXPtADC	cdr7/cuao3	OXCuAO3	Col	adc1	OXPtADC	cdr7/cuao3	OXCuAO3	ATMYC2	BZIP16	ABF2	BZIP28	AREB3	ABI5	AT3G11280	GBF5	AT5G05790	LFY	AT4G36780
AT3G60750	-0.542207	-0.67971	AT3G60750	Transketolase [Source:NCBI gene (formerly Entrezgene);Acc:825246]	-0.542207	NS	-0.662294	NS	-0.727844	-0.67971	-0.419894	NS	NS	-0.694822												Transketolase; FUNCTIONS IN: catalytic activity, transketolase activity; INVOLVED IN: response to cadmium ion, response to salt stress; LOCATED IN: chloroplast stroma, chloroplast, chloroplast envelope; EXPRESSED IN: 27 plant structures; EXPRESSED DURING: 17 growth stages; CONTAINS InterPro DOMAIN/s: Transketolase, bacterial-like (InterPro:IPR005478), Transketolase, N-terminal (InterPro:IPR005474…
AT4G04640	-0.691073	-0.787832	ATPC1	ATPase, F1 complex, gamma subunit protein [Source:NCBI gene (formerly Entrezgene);Acc:825797]	-0.691073	NS	NS	NS	NS	-0.787832	-0.476338	NS	NS	-0.578405					v	v	v		v			ATPC1; FUNCTIONS IN: enzyme regulator activity; INVOLVED IN: photosynthetic electron transport in photosystem II, ATP synthesis coupled proton transport, ATP biosynthetic process; LOCATED IN: in 6 components; EXPRESSED IN: 24 plant structures; EXPRESSED DURING: 14 growth stages; CONTAINS InterPro DOMAIN/s: ATPase, F1 complex, gamma subunit (InterPro:IPR000131); BEST Arabidopsis thaliana protein m…
AT4G09650	-0.544915	-1.29868	ATPD	F-type H+-transporting ATPase subunit delta [Source:NCBI gene (formerly Entrezgene);Acc:826551]	-0.544915	NS	NS	NS	NS	-1.29868	-1.00798	NS	-1.04674	-0.892349												ATP synthase delta-subunit gene (ATPD); FUNCTIONS IN: hydrogen ion transporting ATP synthase activity, rotational mechanism; INVOLVED IN: response to cold, defense response to bacterium, photosynthetic electron transport in photosystem I, photosynthetic electron transport in photosystem II, photosynthesis; LOCATED IN: in 7 components; EXPRESSED IN: 24 plant structures; EXPRESSED DURING: 14 growth…
AT1G29930	-0.831617	-0.883642	CAB1	chlorophyll A/B binding protein 1 [Source:NCBI gene (formerly Entrezgene);Acc:839871]	-0.831617	NS	NS	NS	NS	-0.883642	-0.720207	NS	-0.75536	NS	v				v	v				v		chlorophyll A/B binding protein 1 (CAB1); FUNCTIONS IN: chlorophyll binding; INVOLVED IN: photosynthesis; LOCATED IN: light-harvesting complex, thylakoid, chloroplast thylakoid membrane, chloroplast; EXPRESSED IN: guard cell, juvenile leaf, cultured cell; CONTAINS InterPro DOMAIN/s: Chlorophyll A-B binding protein (InterPro:IPR001344); BEST Arabidopsis thaliana protein match is: chlorophyll A/B b…
AT1G29910	-3.86669	-1.27798	CAB3	chlorophyll A/B binding protein 3 [Source:NCBI gene (formerly Entrezgene);Acc:839869]	-3.86669	NS	NS	NS	NS	-1.27798	-0.674807	NS	NS	NS									v	v		chlorophyll A/B binding protein 3 (CAB3); FUNCTIONS IN: chlorophyll binding; INVOLVED IN: photosynthesis, light harvesting, photosynthesis; LOCATED IN: in 6 components; EXPRESSED IN: cotyledon, guard cell, juvenile leaf, cultured cell, leaf; CONTAINS InterPro DOMAIN/s: Chlorophyll A-B binding protein (InterPro:IPR001344); BEST Arabidopsis thaliana protein match is: chlorophyll A/B-binding protein…
AT1G60950	-0.738206	-0.763954	FED A	2Fe-2S ferredoxin-like superfamily protein [Source:NCBI gene (formerly Entrezgene);Acc:842386]	-0.738206	NS	-0.793074	-0.888731	NS	-0.763954	NS	NS	NS	NS				v	v	v						FED A; FUNCTIONS IN: electron carrier activity, iron-sulfur cluster binding, 2 iron, 2 sulfur cluster binding; INVOLVED IN: photosynthetic electron transport chain, response to light stimulus; LOCATED IN: chloroplast stroma, chloroplast; EXPRESSED IN: 22 plant structures; EXPRESSED DURING: 13 growth stages; CONTAINS InterPro DOMAIN/s: 2Fe-2S ferredoxin, iron-sulphur binding site (InterPro:IPR0060…
AT1G20020	-1.53893	-0.788816	FNR2	ferredoxin-NADP[+]-oxidoreductase 2 [Source:NCBI gene (formerly Entrezgene);Acc:838591]	-1.53893	NS	NS	NS	-0.988351	-0.788816	-0.453335	NS	NS	NS												ferredoxin-NADP(+)-oxidoreductase 2 (FNR2); FUNCTIONS IN: oxidoreductase activity, poly(U) RNA binding, NADPH dehydrogenase activity; INVOLVED IN: oxidation reduction, defense response to fungus, incompatible interaction, defense response to bacterium; LOCATED IN: thylakoid, chloroplast thylakoid membrane, apoplast, chloroplast stroma, chloroplast; EXPRESSED IN: 24 plant structures; EXPRESSED DUR…
AT1G50250	-0.896549	-0.510999	FTSH1	FTSH protease 1 [Source:NCBI gene (formerly Entrezgene);Acc:841447]	-0.896549	NS	-0.728807	-0.903266	-0.77622	-0.510999	NS	NS	NS	-0.436613									v			FTSH protease 1 (FTSH1); FUNCTIONS IN: metallopeptidase activity, protein binding, ATP-dependent peptidase activity, ATPase activity; INVOLVED IN: photosystem II repair, PSII associated light-harvesting complex II catabolic process; LOCATED IN: thylakoid lumen, chloroplast thylakoid membrane, chloroplast, membrane; EXPRESSED IN: 24 plant structures; EXPRESSED DURING: 13 growth stages; CONTAINS In…
AT1G12900	-0.882463	-1.05345	GAPA-2	glyceraldehyde 3-phosphate dehydrogenase A subunit 2 [Source:NCBI gene (formerly Entrezgene);Acc:837848]	-0.882463	NS	NS	NS	NS	-1.05345	-0.506359	NS	NS	-0.662941							v		v			glyceraldehyde 3-phosphate dehydrogenase A subunit 2 (GAPA-2); FUNCTIONS IN: NAD or NADH binding, glyceraldehyde-3-phosphate dehydrogenase activity; INVOLVED IN: oxidation reduction, glycolysis, glucose metabolic process; LOCATED IN: apoplast, chloroplast stroma, chloroplast, membrane, chloroplast envelope; EXPRESSED IN: 24 plant structures; EXPRESSED DURING: 14 growth stages; CONTAINS InterPro D…
AT1G42970	-0.652758	-0.72059	GAPB	glyceraldehyde-3-phosphate dehydrogenase B subunit [Source:NCBI gene (formerly Entrezgene);Acc:840895]	-0.652758	NS	NS	NS	NS	-0.72059	-0.503812	NS	NS	-0.659659												glyceraldehyde-3-phosphate dehydrogenase B subunit (GAPB); FUNCTIONS IN: glyceraldehyde-3-phosphate dehydrogenase (phosphorylating) activity, glyceraldehyde-3-phosphate dehydrogenase (NADP+) (phosphorylating) activity, glyceraldehyde-3-phosphate dehydrogenase activity; INVOLVED IN: in 6 processes; LOCATED IN: in 7 components; EXPRESSED IN: 25 plant structures; EXPRESSED DURING: 15 growth stages; …
AT1G16720	-0.815163	-0.904159	HCF173	high chlorophyll fluorescence phenotype 173 [Source:NCBI gene (formerly Entrezgene);Acc:838243]	-0.815163	NS	NS	NS	-0.5569	-0.904159	-0.820687	-0.689352	-0.590146	-1.073												high chlorophyll fluorescence phenotype 173 (HCF173); FUNCTIONS IN: binding, catalytic activity; INVOLVED IN: photosystem II assembly, translational initiation; LOCATED IN: chloroplast, chloroplast envelope; EXPRESSED IN: 23 plant structures; EXPRESSED DURING: 13 growth stages; CONTAINS InterPro DOMAIN/s: NAD(P)-binding domain (InterPro:IPR016040), NADH:ubiquinone oxidoreductase intermediate-asso…
AT2G34420	-2.56047	-0.919806	LHB1B2	photosystem II light harvesting complex protein B1B2 [Source:NCBI gene (formerly Entrezgene);Acc:818005]	-2.56047	NS	NS	NS	-1.26429	-0.919806	-0.436028	NS	NS	NS												photosystem II light harvesting complex gene B1B2 (LHB1B2); FUNCTIONS IN: chlorophyll binding; INVOLVED IN: photosynthesis, light harvesting in photosystem II, photosynthesis; LOCATED IN: in 7 components; EXPRESSED IN: cotyledon, guard cell, juvenile leaf, cultured cell, leaf; EXPRESSED DURING: seed development stages; CONTAINS InterPro DOMAIN/s: Chlorophyll A-B binding protein (InterPro:IPR00134…
AT3G54890	-1.67604	-1.05025	LHCA1	chlorophyll a-b binding protein 6 [Source:NCBI gene (formerly Entrezgene);Acc:824654]	-1.67604	NS	NS	-1.57892	NS	-1.05025	-0.632086	-0.870042	-0.789392	NS			v	v	v	v		v	v	v		photosystem I light harvesting complex gene 1 (LHCA1); FUNCTIONS IN: chlorophyll binding; INVOLVED IN: response to blue light, response to red light, photosynthesis, light harvesting in photosystem I, response to far red light, photosynthesis; LOCATED IN: in 7 components; EXPRESSED IN: 29 plant structures; EXPRESSED DURING: 14 growth stages; CONTAINS InterPro DOMAIN/s: Chlorophyll A-B binding pro…
AT3G61470	-0.56417	-0.596238	LHCA2	photosystem I light harvesting complex protein [Source:NCBI gene (formerly Entrezgene);Acc:825320]	-0.56417	NS	0.885699	NS	NS	-0.596238	NS	NS	NS	NS					v				v		v	photosystem I light harvesting complex gene 2 (LHCA2); FUNCTIONS IN: chlorophyll binding; INVOLVED IN: photosynthesis, light harvesting in photosystem I, photosynthesis; LOCATED IN: in 6 components; EXPRESSED IN: leaf; EXPRESSED DURING: seedling growth; CONTAINS InterPro DOMAIN/s: Chlorophyll A-B binding protein (InterPro:IPR001344); BEST Arabidopsis thaliana protein match is: photosystem I light…
AT1G61520	-1.24202	-0.702557	LHCA3	PSI type III chlorophyll a/b-binding protein [Source:NCBI gene (formerly Entrezgene);Acc:842446]	-1.24202	NS	NS	NS	NS	-0.702557	-0.476733	NS	NS	NS		v	v		v	v	v	v			v	photosystem I light harvesting complex gene 3 (LHCA3); FUNCTIONS IN: chlorophyll binding; INVOLVED IN: photosynthesis, light harvesting, photosynthesis; LOCATED IN: in 6 components; EXPRESSED IN: 24 plant structures; EXPRESSED DURING: 15 growth stages; CONTAINS InterPro DOMAIN/s: Chlorophyll A-B binding protein (InterPro:IPR001344); BEST Arabidopsis thaliana protein match is: photosystem I light …
AT3G47470	-1.89048	-0.775864	LHCA4	light-harvesting chlorophyll-protein complex I subunit A4 [Source:NCBI gene (formerly Entrezgene);Acc:823901]	-1.89048	NS	NS	NS	-0.825486	-0.775864	-0.451938	NS	NS	NS		v	v		v	v	v	v	v		v	light-harvesting chlorophyll-protein complex I subunit A4 (LHCA4); FUNCTIONS IN: chlorophyll binding; INVOLVED IN: response to karrikin, photosynthesis; LOCATED IN: in 7 components; EXPRESSED IN: 24 plant structures; EXPRESSED DURING: 14 growth stages; CONTAINS InterPro DOMAIN/s: Chlorophyll A-B binding protein (InterPro:IPR001344); BEST Arabidopsis thaliana protein match is: photosystem I light …
AT2G05100	-2.58868	-2.29777	LHCB2.1	photosystem II light harvesting complex protein 2.1 [Source:NCBI gene (formerly Entrezgene);Acc:815058]	-2.58868	NS	NS	-1.38965	-1.76462	-2.29777	-1.26368	NS	NS	NS									v			photosystem II light harvesting complex gene 2.1 (LHCB2.1); FUNCTIONS IN: chlorophyll binding; INVOLVED IN: response to salt stress, response to blue light, response to red light, response to far red light, photosynthesis; LOCATED IN: in 7 components; EXPRESSED IN: 12 plant structures; CONTAINS InterPro DOMAIN/s: Chlorophyll A-B binding protein (InterPro:IPR001344); BEST Arabidopsis thaliana prot…
AT3G27690	-3.82898	-2.25274	LHCB2.3	photosystem II light harvesting complex protein 2.3 [Source:NCBI gene (formerly Entrezgene);Acc:822391]	-3.82898	NS	NS	NS	NS	-2.25274	-1.61151	NS	NS	-1.36609		v	v	v	v	v		v				photosystem II light harvesting complex gene 2.3 (LHCB2.3); FUNCTIONS IN: chlorophyll binding; INVOLVED IN: response to blue light, response to red light, response to far red light, photosynthesis; LOCATED IN: light-harvesting complex, thylakoid, chloroplast thylakoid membrane, chloroplast envelope; EXPRESSED IN: 27 plant structures; EXPRESSED DURING: 13 growth stages; CONTAINS InterPro DOMAIN/s:…
AT5G54270	-2.30084	-1.50951	LHCB3	light-harvesting chlorophyll B-binding protein 3 [Source:NCBI gene (formerly Entrezgene);Acc:835515]	-2.30084	NS	NS	-1.47752	NS	-1.50951	-0.787225	NS	NS	NS											v	light-harvesting chlorophyll B-binding protein 3 (LHCB3); FUNCTIONS IN: structural molecule activity; INVOLVED IN: photosynthesis; LOCATED IN: light-harvesting complex, thylakoid, chloroplast thylakoid membrane, chloroplast; EXPRESSED IN: 24 plant structures; EXPRESSED DURING: 14 growth stages; CONTAINS InterPro DOMAIN/s: Chlorophyll A-B binding protein (InterPro:IPR001344); BEST Arabidopsis thal…
AT5G01530	-0.798801	-0.720532	LHCB4.1	light harvesting complex photosystem II [Source:NCBI gene (formerly Entrezgene);Acc:830325]	-0.798801	NS	NS	NS	NS	-0.720532	-0.590031	NS	-0.608009	-0.512127					v	v	v		v	v	v	light harvesting complex photosystem II (LHCB4.1); FUNCTIONS IN: chlorophyll binding; INVOLVED IN: response to blue light, response to red light, response to far red light, photosynthesis; LOCATED IN: in 6 components; EXPRESSED IN: 27 plant structures; EXPRESSED DURING: 14 growth stages; CONTAINS InterPro DOMAIN/s: Chlorophyll A-B binding protein (InterPro:IPR001344); BEST Arabidopsis thaliana pr…
AT3G08940	-0.827872	-0.660286	LHCB4.2	light harvesting complex photosystem II [Source:NCBI gene (formerly Entrezgene);Acc:820043]	-0.827872	NS	NS	NS	NS	-0.660286	NS	NS	NS	NS												light harvesting complex photosystem II (LHCB4.2); FUNCTIONS IN: chlorophyll binding; INVOLVED IN: response to blue light, response to red light, response to far red light; LOCATED IN: chloroplast thylakoid membrane, chloroplast, membrane, chloroplast envelope; EXPRESSED IN: 26 plant structures; EXPRESSED DURING: 14 growth stages; CONTAINS InterPro DOMAIN/s: Chlorophyll A-B binding protein (Inter…
AT4G10340	-0.791437	-0.716828	LHCB5	light harvesting complex of photosystem II 5 [Source:NCBI gene (formerly Entrezgene);Acc:826626]	-0.791437	NS	NS	-0.701468	NS	-0.716828	NS	NS	NS	NS												light harvesting complex of photosystem II 5 (LHCB5); FUNCTIONS IN: chlorophyll binding; INVOLVED IN: response to blue light, response to red light, response to far red light, photosynthesis, nonphotochemical quenching; LOCATED IN: in 9 components; EXPRESSED IN: 29 plant structures; EXPRESSED DURING: 14 growth stages; CONTAINS InterPro DOMAIN/s: Chlorophyll A-B binding protein (InterPro:IPR001344…
AT1G15820	-1.82839	-1.41315	LHCB6	light harvesting complex photosystem II subunit 6 [Source:NCBI gene (formerly Entrezgene);Acc:838151]	-1.82839	NS	NS	-1.06578	-1.29503	-1.41315	-0.916388	NS	NS	-0.753782		v	v		v	v					v	light harvesting complex photosystem II subunit 6 (LHCB6); FUNCTIONS IN: chlorophyll binding; INVOLVED IN: photosynthesis, nonphotochemical quenching; LOCATED IN: in 7 components; EXPRESSED IN: 24 plant structures; EXPRESSED DURING: 14 growth stages; CONTAINS InterPro DOMAIN/s: Chlorophyll A-B binding protein (InterPro:IPR001344); BEST Arabidopsis thaliana protein match is: photosystem I light ha…
AT1G75690	-1.59477	-0.674183	LQY1	DnaJ/Hsp40 cysteine-rich domain superfamily protein [Source:NCBI gene (formerly Entrezgene);Acc:843903]	-1.59477	NS	NS	NS	NS	-0.674183	-0.493783	NS	NS	NS							v		v	v		DnaJ/Hsp40 cysteine-rich domain superfamily protein; FUNCTIONS IN: unfolded protein binding, heat shock protein binding; INVOLVED IN: protein folding; LOCATED IN: chloroplast thylakoid membrane, chloroplast stroma, chloroplast; EXPRESSED IN: 23 plant structures; EXPRESSED DURING: 13 growth stages; CONTAINS InterPro DOMAIN/s: Heat shock protein DnaJ, cysteine-rich domain (InterPro:IPR001305); Has …
AT5G57030	-0.904276	-1.08847	LUT2	Lycopene beta/epsilon cyclase protein [Source:NCBI gene (formerly Entrezgene);Acc:835806]	-0.904276	NS	NS	NS	-0.744006	-1.08847	-0.710249	NS	-1.06558	-0.772887												LUTEIN DEFICIENT 2 (LUT2); CONTAINS InterPro DOMAIN/s: Lycopene beta/epsilon cyclase (InterPro:IPR008671), Lycopene cyclase, beta/epsilon (InterPro:IPR010108); BEST Arabidopsis thaliana protein match is: lycopene cyclase (TAIR:AT3G10230.1); Has 1086 Blast hits to 1081 proteins in 157 species: Archae - 2; Bacteria - 176; Metazoa - 0; Fungi - 0; Plants - 363; Viruses - 0; Other Eukaryotes - 545 (so…
ATCG00440	-0.4083	-0.504446	ndhC		-0.4083	NS	NS	NS	NS	-0.504446	-0.65386	NS	NS	-0.439077												NDHC; FUNCTIONS IN: NADH dehydrogenase activity; INVOLVED IN: photosynthesis; LOCATED IN: chloroplast; EXPRESSED IN: 23 plant structures; EXPRESSED DURING: 13 growth stages; CONTAINS InterPro DOMAIN/s: NADH:ubiquinone/plastoquinone oxidoreductase, chain 3 (InterPro:IPR000440); BEST Arabidopsis thaliana protein match is: NADH:ubiquinone/plastoquinone oxidoreductase, chain 3 protein (TAIR:AT2G07751…
ATCG01010	-0.319446	-0.596653	ndhF		-0.319446	NS	NS	NS	NS	-0.596653	-0.548913	NS	NS	-0.47073												NDHF; FUNCTIONS IN: NADH dehydrogenase activity; INVOLVED IN: photosynthesis; LOCATED IN: chloroplast; EXPRESSED IN: 21 plant structures; EXPRESSED DURING: 12 growth stages; CONTAINS InterPro DOMAIN/s: NADH:ubiquinone/plastoquinone oxidoreductase, chloroplast chain 5, C-terminal (InterPro:IPR002128), NADH-plastoquinone oxidoreductase, chain 5 (InterPro:IPR003945), NADH-plastoquinone oxidoreductas…
AT4G03280	-0.645954	-0.528898	PETC	photosynthetic electron transfer C [Source:NCBI gene (formerly Entrezgene);Acc:827996]	-0.645954	NS	NS	NS	NS	-0.528898	NS	NS	NS	-0.488553										v		photosynthetic electron transfer C (PETC); FUNCTIONS IN: electron transporter, transferring electrons from cytochrome b6/f complex of photosystem II activity; INVOLVED IN: response to karrikin, defense response to bacterium, photosynthetic electron transport in cytochrome b6/f, nonphotochemical quenching; LOCATED IN: in 7 components; EXPRESSED IN: 26 plant structures; EXPRESSED DURING: 14 growth …
AT3G12780	-0.399866	-0.786709	PGK1	phosphoglycerate kinase 1 [Source:NCBI gene (formerly Entrezgene);Acc:820461]	-0.399866	NS	NS	NS	NS	-0.786709	-0.630878	NS	-0.509011	-0.679243											v	phosphoglycerate kinase 1 (PGK1); FUNCTIONS IN: phosphoglycerate kinase activity; INVOLVED IN: response to cadmium ion, response to cold, glycolysis, peptidyl-cysteine S-nitrosylation; LOCATED IN: in 11 components; EXPRESSED IN: 26 plant structures; EXPRESSED DURING: 15 growth stages; CONTAINS InterPro DOMAIN/s: Phosphoglycerate kinase, N-terminal (InterPro:IPR015824), Phosphoglycerate kinase (In…
AT2G05620	-0.975408	-0.699184	PGR5	proton gradient regulation 5 [Source:NCBI gene (formerly Entrezgene);Acc:815111]	-0.975408	NS	NS	NS	NS	-0.699184	NS	NS	NS	NS											v	proton gradient regulation 5 (PGR5); FUNCTIONS IN: electron carrier activity; INVOLVED IN: response to water deprivation, response to high light intensity, photosynthetic electron transport in photosystem I; LOCATED IN: chloroplast thylakoid membrane, chloroplast, chloroplast thylakoid; EXPRESSED IN: 30 plant structures; EXPRESSED DURING: 15 growth stages; Has 90 Blast hits to 90 proteins in 40 s…
AT1G32060	-0.923686	-0.779435	PRK	phosphoribulokinase [Source:NCBI gene (formerly Entrezgene);Acc:840098]	-0.923686	NS	NS	NS	NS	-0.779435	-0.608954	NS	-0.61321	-0.721212					v	v	v		v		v	phosphoribulokinase (PRK); FUNCTIONS IN: protein binding, phosphoribulokinase activity, ATP binding; INVOLVED IN: response to cold, defense response to bacterium, biosynthetic process, peptidyl-cysteine S-nitrosylation; LOCATED IN: in 8 components; EXPRESSED IN: 24 plant structures; EXPRESSED DURING: 15 growth stages; CONTAINS InterPro DOMAIN/s: Phosphoribulokinase/uridine kinase (InterPro:IPR006…
AT1G08380	-0.905774	-1.20832	PSAO	photosystem I subunit O [Source:NCBI gene (formerly Entrezgene);Acc:837358]	-0.905774	NS	NS	NS	NS	-1.20832	-0.564063	NS	-0.978981	NS			v		v	v				v		photosystem I subunit O (PSAO); FUNCTIONS IN: molecular_function unknown; INVOLVED IN: response to salt stress, photosynthesis, light harvesting in photosystem I; LOCATED IN: thylakoid, photosystem I, chloroplast; EXPRESSED IN: 21 plant structures; EXPRESSED DURING: 13 growth stages; CONTAINS InterPro DOMAIN/s: Photosystem I PsaO (InterPro:IPR017498); Has 161 Blast hits to 161 proteins in 28 spec…
AT2G20890	-0.382716	-0.896477	PSB29	photosystem II reaction center PSB29 protein [Source:NCBI gene (formerly Entrezgene);Acc:816623]	-0.382716	NS	NS	NS	NS	-0.896477	-0.734249	NS	-0.684312	-0.754134		v	v		v	v		v			v	photosystem II reaction center PSB29 protein (PSB29); FUNCTIONS IN: molecular_function unknown; INVOLVED IN: in 6 processes; LOCATED IN: in 9 components; EXPRESSED IN: 23 plant structures; EXPRESSED DURING: 14 growth stages; CONTAINS InterPro DOMAIN/s: Photosystem II biogenesis protein Psp29 (InterPro:IPR017499); Has 330 Blast hits to 330 proteins in 95 species: Archae - 0; Bacteria - 141; Metazo…
AT5G66570	-0.846863	-0.733041	PSBO1	PS II oxygen-evolving complex 1 [Source:NCBI gene (formerly Entrezgene);Acc:836789]	-0.846863	NS	NS	NS	NS	-0.733041	-0.483366	NS	NS	NS		v	v		v	v			v	v		PS II oxygen-evolving complex 1 (PSBO1); FUNCTIONS IN: oxygen evolving activity, poly(U) RNA binding; INVOLVED IN: in 6 processes; LOCATED IN: in 10 components; EXPRESSED IN: 24 plant structures; EXPRESSED DURING: 15 growth stages; CONTAINS InterPro DOMAIN/s: Photosystem II manganese-stabilising protein PsbO (InterPro:IPR002628); BEST Arabidopsis thaliana protein match is: photosystem II subunit …
AT3G50820	-0.823048	-0.754887	PSBO2	photosystem II subunit O-2 [Source:NCBI gene (formerly Entrezgene);Acc:824246]	-0.823048	NS	NS	NS	NS	-0.754887	-0.646288	NS	-0.452969	-0.649093					v	v	v		v		v	photosystem II subunit O-2 (PSBO2); FUNCTIONS IN: oxygen evolving activity, poly(U) RNA binding; INVOLVED IN: photosynthesis, light reaction, photoinhibition, photosystem II assembly, photosystem II stabilization, regulation of protein amino acid dephosphorylation; LOCATED IN: in 9 components; EXPRESSED IN: 24 plant structures; EXPRESSED DURING: 14 growth stages; CONTAINS InterPro DOMAIN/s: Photo…
AT1G06680	-1.53399	-1.0177	PSBP-1	photosystem II subunit P-1 [Source:NCBI gene (formerly Entrezgene);Acc:837178]	-1.53399	NS	NS	-0.86551	-0.804887	-1.0177	-0.64933	NS	-0.889224	-0.535082		v	v	v	v	v		v			v	photosystem II subunit P-1 (PSBP-1); FUNCTIONS IN: poly(U) RNA binding; INVOLVED IN: photosynthesis, light reaction, defense response to bacterium, response to light intensity; LOCATED IN: in 12 components; EXPRESSED IN: 27 plant structures; EXPRESSED DURING: 15 growth stages; CONTAINS InterPro DOMAIN/s: Photosystem II oxygen evolving complex protein PsbP (InterPro:IPR002683), Mog1/PsbP/DUF1795, …
AT4G21280	-0.622813	-1.14352	PSBQA	photosystem II subunit QA [Source:NCBI gene (formerly Entrezgene);Acc:827877]	-0.622813	NS	NS	NS	NS	-1.14352	-0.565204	NS	-0.939693	-0.540009		v	v	v	v	v		v			v	photosystem II subunit QA (PSBQA); FUNCTIONS IN: calcium ion binding; INVOLVED IN: response to light stimulus, peptidyl-cysteine S-nitrosylation, response to light intensity; LOCATED IN: in 8 components; EXPRESSED IN: 27 plant structures; EXPRESSED DURING: 15 growth stages; CONTAINS InterPro DOMAIN/s: Photosystem II oxygen evolving complex protein PsbQ (InterPro:IPR008797), Twin-arginine transloc…
AT1G79040	-0.842999	-0.632762	PSBR	photosystem II subunit R [Source:NCBI gene (formerly Entrezgene);Acc:844245]	-0.842999	NS	NS	NS	NS	-0.632762	-0.620727	NS	NS	NS		v	v	v	v	v		v			v	photosystem II subunit R (PSBR); FUNCTIONS IN: molecular_function unknown; INVOLVED IN: photosystem II oxygen evolving complex assembly, photosynthesis, response to light intensity; LOCATED IN: thylakoid, chloroplast thylakoid membrane, chloroplast, photosystem II; EXPRESSED IN: 25 plant structures; EXPRESSED DURING: 14 growth stages; CONTAINS InterPro DOMAIN/s: Photosystem II protein PsbR (Inter…
AT1G67740	-2.07458	-0.834424	PSBY	photosystem II BY [Source:NCBI gene (formerly Entrezgene);Acc:843099]	-2.07458	NS	NS	NS	-1.0794	-0.834424	-0.917054	NS	-0.744713	-0.865785										v		photosystem II BY (PSBY); FUNCTIONS IN: manganese ion binding; INVOLVED IN: photosynthesis; LOCATED IN: chloroplast stromal thylakoid, chloroplast thylakoid membrane, chloroplast photosystem II, photosystem II; EXPRESSED IN: 22 plant structures; EXPRESSED DURING: 14 growth stages; CONTAINS InterPro DOMAIN/s: Photosystem II protein PsbY (InterPro:IPR009388); Has 135 Blast hits to 91 proteins in 24…
AT1G67090	-0.65037	-0.781581	RBCS1A	ribulose bisphosphate carboxylase small chain 1A [Source:NCBI gene (formerly Entrezgene);Acc:843029]	-0.65037	NS	NS	NS	NS	-0.781581	-0.63245	NS	NS	-0.814754	v	v	v		v	v	v	v	v			ribulose bisphosphate carboxylase small chain 1A (RBCS1A); FUNCTIONS IN: ribulose-bisphosphate carboxylase activity, copper ion binding; INVOLVED IN: carbon fixation, response to cold, response to blue light, response to red light, response to far red light; LOCATED IN: in 10 components; EXPRESSED IN: 22 plant structures; EXPRESSED DURING: L mature pollen stage, M germinated pollen stage, seedlin…
AT3G55800	-1.38745	-0.709225	SBPASE	sedoheptulose-bisphosphatase [Source:NCBI gene (formerly Entrezgene);Acc:824746]	-1.38745	NS	NS	NS	NS	-0.709225	-0.406765	NS	-0.482975	-0.697418		v	v		v	v		v			v	sedoheptulose-bisphosphatase (SBPASE); FUNCTIONS IN: sedoheptulose-bisphosphatase activity, phosphoric ester hydrolase activity; INVOLVED IN: in 6 processes; LOCATED IN: thylakoid, apoplast, chloroplast stroma, chloroplast, chloroplast envelope; EXPRESSED IN: 24 plant structures; EXPRESSED DURING: 14 growth stages; CONTAINS InterPro DOMAIN/s: Fructose-1,6-bisphosphatase, active site (InterPro:IPR…
AT2G21970	-0.823453	-0.930402	SEP2	stress enhanced protein 2 [Source:NCBI gene (formerly Entrezgene);Acc:816733]	-0.823453	NS	-0.744977	NS	-0.992908	-0.930402	-0.538381	NS	-0.694183	-0.6932				v		v						stress enhanced protein 2 (SEP2); Has 34 Blast hits to 34 proteins in 10 species: Archae - 0; Bacteria - 0; Metazoa - 0; Fungi - 0; Plants - 34; Viruses - 0; Other Eukaryotes - 0 (source: NCBI BLink).
AT5G24120	-2.05192	-2.12913	SIGE	sigma factor E [Source:NCBI gene (formerly Entrezgene);Acc:832477]	-2.05192	-1.97183	-1.40336	-2.07077	-1.64505	-2.12913	-1.63363	NS	-1.54307	-1.71833										v		sigma factor E (SIGE); CONTAINS InterPro DOMAIN/s: RNA polymerase sigma factor, region 2 (InterPro:IPR013325), Winged helix-turn-helix transcription repressor DNA-binding (InterPro:IPR011991), RNA polymerase sigma-70 region 3 (InterPro:IPR007624), RNA polymerase sigma-70 (InterPro:IPR014284), RNA polymerase sigma factor, region 3/4 (InterPro:IPR013324), RNA polymerase sigma-70 region 2 (InterPro:…
AT1G27730	-1.23227	-1.02375	STZ	salt tolerance zinc finger [Source:NCBI gene (formerly Entrezgene);Acc:839666]	-1.23227	NS	NS	NS	NS	-1.02375	NS	NS	NS	NS									v	v	v	salt tolerance zinc finger (STZ); CONTAINS InterPro DOMAIN/s: Zinc finger, C2H2-like (InterPro:IPR015880), Zinc finger, C2H2-type (InterPro:IPR007087); BEST Arabidopsis thaliana protein match is: zinc finger of Arabidopsis thaliana 6 (TAIR:AT5G04340.1); Has 5350 Blast hits to 3982 proteins in 146 species: Archae - 0; Bacteria - 0; Metazoa - 4198; Fungi - 48; Plants - 937; Viruses - 0; Other Eukar…
AT4G01050	-0.439278	-0.468241	TROL	thylakoid rhodanese-like protein [Source:NCBI gene (formerly Entrezgene);Acc:827921]	-0.439278	NS	NS	NS	NS	-0.468241	-0.603684	NS	NS	-0.57848		v	v	v	v	v		v		v		thylakoid rhodanese-like (TROL); FUNCTIONS IN: protein binding; INVOLVED IN: defense response to bacterium, photosynthetic electron transport in photosystem II; LOCATED IN: chloroplast thylakoid membrane, chloroplast, chloroplast envelope; EXPRESSED IN: 23 plant structures; EXPRESSED DURING: 15 growth stages; CONTAINS InterPro DOMAIN/s: Rhodanese-like (InterPro:IPR001763); BEST Arabidopsis thalia…
AT5G42270	-0.861396	-0.665036	VAR1	FtsH extracellular protease family [Source:NCBI gene (formerly Entrezgene);Acc:834232]	-0.861396	NS	NS	NS	-0.705837	-0.665036	-0.615419	NS	NS	-0.616029												VARIEGATED 1 (VAR1); FUNCTIONS IN: metallopeptidase activity, ATP-dependent peptidase activity, ATPase activity; INVOLVED IN: photoinhibition, PSII associated light-harvesting complex II catabolic process, protein catabolic process; LOCATED IN: thylakoid, chloroplast thylakoid membrane, chloroplast, chloroplast envelope; EXPRESSED IN: 24 plant structures; EXPRESSED DURING: 13 growth stages; CONTA…
AT2G30950	-0.696291	-0.650047	VAR2	FtsH extracellular protease family [Source:NCBI gene (formerly Entrezgene);Acc:817646]	-0.696291	NS	NS	-0.792407	-0.598669	-0.650047	-0.449221	NS	NS	-0.488797												VARIEGATED 2 (VAR2); FUNCTIONS IN: metallopeptidase activity, ATP-dependent peptidase activity, ATPase activity, zinc ion binding; INVOLVED IN: photoinhibition, oxygen and reactive oxygen species metabolic process, thylakoid membrane organization, PSII associated light-harvesting complex II catabolic process, protein catabolic process; LOCATED IN: in 6 components; EXPRESSED IN: 26 plant structure…
AT5G01600	-0.440995	1.38444	FER1	ferretin 1 [Source:NCBI gene (formerly Entrezgene);Acc:831720]	-0.440995	NS	NS	NS	NS	1.38444	1.23486	1.59266	1.17853	1.48805											v	ferretin 1 (FER1); FUNCTIONS IN: ferric iron binding, iron ion binding; INVOLVED IN: in 12 processes; LOCATED IN: thylakoid, chloroplast thylakoid membrane, chloroplast stroma, chloroplast, membrane; EXPRESSED IN: 25 plant structures; EXPRESSED DURING: 15 growth stages; CONTAINS InterPro DOMAIN/s: Ferritin, N-terminal (InterPro:IPR001519), Ferritin-related (InterPro:IPR012347), Ferritin-like (Int…
GO enrichment analysis
GO-BP
Enrichment FDR	nGenes	Pathway Genes	Fold Enrichment	Pathways
1.56825e-35	15	23	375.38	GO:0009768 photosynthesis light harvesting in photosystem I
1.18311e-42	19	37	295.57	GO:0009765 photosynthesis light harvesting
1.30733e-10	5	11	261.629	GO:0010205 photoinhibition
1.07907e-13	7	21	191.861	GO:0019253 reductive pentose-phosphate cycle
1.07907e-13	7	21	191.861	GO:0019685 photosynthesis dark reaction
1.3089e-11	6	19	181.763	GO:0009645 response to low light intensity stimulus
3.76539e-26	14	53	152.041	GO:0018298 protein-chromophore linkage
7.66574e-13	7	27	149.225	GO:0010207 photosystem II assembly
9.60726e-13	7	28	143.896	GO:0015977 carbon fixation
2.66709e-71	36	148	140.007	GO:0019684 photosynthesis light reaction
2.37402e-27	15	62	139.254	GO:0009644 response to high light intensity
1.29829e-23	13	55	136.047	GO:0009767 photosynthetic electron transport chain
2.38335e-88	46	281	94.2236	GO:0015979 photosynthesis
1.02631e-23	16	143	64.4009	GO:0009642 response to light intensity
3.47187e-58	39	494	45.4408	GO:0006091 generation of precursor metabolites and energy
2.15291e-19	15	205	42.1159	GO:0022900 electron transport chain
2.81423e-26	26	773	19.3599	GO:0009416 response to light stimulus
4.66454e-26	26	796	18.8005	GO:0009314 response to radiation
3.2151e-12	13	400	18.7065	GO:0009409 response to cold
8.99856e-23	32	2170	8.48786	GO:0009628 response to abiotic stimulus
GO-MF
Enrichment FDR	nGenes	Pathway Genes	Fold Enrichment	Pathways
7.67621e-05	2	3	383.722	GO:0047100 glyceraldehyde-3-phosphate dehydrogenase (NADP+) (phosphorylating) ac
8.12631e-32	15	34	253.934	GO:0016168 chlorophyll binding
0.00022527	2	5	230.233	GO:0010242 oxygen evolving activity
1.84785e-24	14	68	118.502	GO:0019904 protein domain specific binding
1.88146e-06	4	28	82.2262	GO:0008266 poly(U) RNA binding
1.88146e-06	4	28	82.2262	GO:1901149 salicylic acid binding
3.01361e-06	4	32	71.9479	GO:0008187 poly-pyrimidine tract binding
0.000250999	3	37	46.6689	GO:0004176 ATP-dependent peptidase activity
6.2751e-05	4	70	32.8905	GO:0033293 monocarboxylic acid binding
8.03203e-05	4	77	29.9004	GO:0003727 single-stranded RNA binding
1.88146e-06	6	138	25.0254	GO:0009055 electron transfer activity
0.000250999	4	106	21.7201	GO:0043177 organic acid binding
0.000272331	4	111	20.7417	GO:0031406 carboxylic acid binding
7.77856e-15	15	421	20.5077	GO:0046906 tetrapyrrole binding
1.84785e-24	27	1059	14.6749	GO:0003729 mRNA binding
1.3032e-19	28	1836	8.77796	GO:0003723 RNA binding
2.21743e-05	13	1598	4.68247	GO:0016491 oxidoreductase activity
8.54462e-10	26	3803	3.9351	GO:0046872 metal ion binding
8.54462e-10	26	3824	3.91349	GO:0043169 cation binding
1.59455e-11	30	4505	3.83296	GO:0003676 nucleic acid binding
GO-CC
Enrichment FDR	nGenes	Pathway Genes	Fold Enrichment	Pathways
2.16132e-31	15	43	200.785	GO:0009522 photosystem I
4.1886e-44	22	78	162.344	GO:0009523 photosystem II
3.30922e-44	23	97	136.479	GO:0009521 photosystem
6.1017e-64	40	423	54.4287	GO:0009535 chloroplast thylakoid membrane
6.1017e-64	40	425	54.1725	GO:0055035 plastid thylakoid membrane
2.2888e-63	40	445	51.7378	GO:0042651 thylakoid membrane
2.2888e-63	40	446	51.6218	GO:0034357 photosynthetic membrane
7.73533e-61	40	520	44.2756	GO:0009534 chloroplast thylakoid
7.93511e-61	40	522	44.106	GO:0031976 plastid thylakoid
6.4301e-63	42	602	40.157	GO:0009579 thylakoid
1.99271e-58	41	682	34.6025	GO:0042170 plastid membrane
7.73533e-61	45	995	26.0314	GO:0009526 plastid envelope
2.16995e-31	27	638	24.3585	GO:0098796 membrane protein complex
2.40924e-25	24	701	19.7061	GO:0009941 chloroplast envelope
1.00018e-52	45	1515	17.0965	GO:0031967 organelle envelope
1.00018e-52	45	1515	17.0965	GO:0031975 envelope
8.33572e-43	40	1472	15.6409	GO:0031984 organelle subcompartment
2.64838e-48	47	2403	11.2578	GO:0009507 chloroplast
2.09696e-44	47	2910	9.29636	GO:0009536 plastid
6.05879e-35	41	2564	9.20395	GO:0031090 organelle membrane
					TF Expression Log2 FC (FL/GC)
TF enrichment-AGRIS						Root					Shoot
Enrichment FDR	nGenes	Pathway Genes	Fold Enrichment	Transcription Factor Binding Motif	Gene ID	Col	adc1	OXPtADC	cdr7/cuao3	OXCuAO3	Col	adc1	OXPtADC	cdr7/cuao3	OXCuAO3
0.000506068	2	4	287.792	ATMYC2 target	AT1G32640	NS	NS	NS	NS	NS	NS	NS	NS	NS	NS
0.000506068	12	1631	4.23483	BZIP16 target	AT2G35530	NS	NS	NS	NS	NS	NS	NS	NS	NS	NS
0.00042789	14	2112	3.81542	ABF2 target	AT1G45249	-0.34824	NS	NS	NS	NS	NS	-0.656886	NS	NS	-0.499802
0.0472642	8	1469	3.13456	BZIP28 target	AT3G10800	NS	NS	NS	NS	NS	NS	NS	NS	NS	NS
0.000103302	21	3936	3.07095	AREB3 target	AT3G56850	NS	NS	NS	NS	NS	0.498549	NS	NS	NS	NS
0.000146144	21	4189	2.88547	ABI5 target	AT2G36270	NS	NS	NS	NS	NS	2.13882	1.85488	NS	NS	NS
0.0472642	9	1815	2.85413	AT3G11280 target	AT3G11280	NS	NS	NS	NS	NS	NS	0.63051	NS	NS	0.757124
0.0298431	11	2268	2.79163	GBF5 target	AT2G18160	0.370009	NS	NS	NS	NS	NS	NS	NS	NS	-0.450046
0.00705389	15	3277	2.63465	AT5G05790 target	AT5G05790	NS	NS	NS	NS	NS	NS	NS	NS	NS	NS
0.0303637	12	2679	2.5782	LFY target	AT5G61850	NS	NS	NS	NS	NS	NS	NS	NS	NS	NS
0.0457781	17	4944	1.97915	AT4G36780 target	AT4G36780	NS	NS	NS	NS	NS	0.657054	NS	0.665441	0.652078	NS

## Sheet: R
Supplemental table S9. Lists of Col DEGs associated with GO:0015979 (Photosynthesis). These DEGs were clustered based on their relative expressions in shoots and roots. Organ-specific expression responses to spaceflight conditions are shown for the 5 genotypes included in APEX08. The results of GO- and transcription-factor target enrichment analyses are also shown in this spreadsheet. NS represen…
					DEG Expcression log2 FC (FL/GC)
	Log2FC				Root	adc1-R	OXPtADC-R	cdr7/cuao3-R	OXCuAO3-R	Shoot	adc1-S	OXPtADC-S	cdr7/cuao3-S	OXCuAO3-S	Annotation
Gene ID	Col-Root	Col-Shoot	Symbol	Annotation	Col	adc1	OXPtADC	cdr7/cuao3	OXCuAO3	Col	adc1	OXPtADC	cdr7/cuao3	OXCuAO3
ATCG00520	-0.273184	N.S.	ycf4		-0.273184	NS	NS	NS	NS	NS	NS	NS	NS	NS	YCF4; FUNCTIONS IN: unfolded protein binding; INVOLVED IN: photosystem I assembly; LOCATED IN: chloroplast; EXPRESSED IN: 22 plant structures; EXPRESSED DURING: 13 growth stages; CONTAINS InterPro DOMAIN/s: Photosystem I assembly protein Ycf4 (InterPro:IPR003359).
ATCG00080	-0.351025	N.S.	psbI		-0.351025	NS	NS	NS	NS	NS	NS	NS	NS	NS	photosystem II reaction center protein I (PSBI); CONTAINS InterPro DOMAIN/s: Photosystem II protein PsbI (InterPro:IPR003686).
ATCG00690	-0.400372	N.S.	psbT		-0.400372	NS	NS	NS	NS	NS	-0.944979	NS	NS	NS	photosystem II reaction center protein T (PSBT); FUNCTIONS IN: chlorophyll binding; INVOLVED IN: photosynthesis; LOCATED IN: thylakoid, chloroplast thylakoid membrane, photosystem II; EXPRESSED IN: 22 plant structures; EXPRESSED DURING: 13 growth stages; CONTAINS InterPro DOMAIN/s: Photosystem II protein PsbT (InterPro:IPR001743).
ATCG00540	-0.40288	N.S.	petA		-0.40288	NS	NS	NS	NS	NS	NS	NS	NS	NS	photosynthetic electron transfer A (PETA); FUNCTIONS IN: electron transporter, transferring electrons within cytochrome b6/f complex of photosystem II activity; INVOLVED IN: photosynthetic electron transport in cytochrome b6/f; LOCATED IN: thylakoid, chloroplast thylakoid membrane, cytochrome b6f complex, chloroplast, membrane; EXPRESSED IN: 25 plant structures; EXPRESSED DURING: 13 growth stages…
AT2G18790	-0.408849	N.S.	PHYB	phytochrome B [Source:NCBI gene (formerly Entrezgene);Acc:816394]	-0.408849	NS	NS	NS	-0.559499	NS	-0.470175	NS	NS	-0.491627	phytochrome B (PHYB); CONTAINS InterPro DOMAIN/s: Phytochrome, central region (InterPro:IPR013515), Signal transduction histidine kinase, core (InterPro:IPR005467), PAS fold (InterPro:IPR013767), PAS (InterPro:IPR000014), Phytochrome chromophore attachment domain (InterPro:IPR016132), ATPase-like, ATP-binding domain (InterPro:IPR003594), PAS fold-2 (InterPro:IPR013654), Phytochrome A/B/C/D/E (Int…
ATCG00680	-0.441077	N.S.	psbB		-0.441077	NS	NS	NS	NS	NS	-0.401817	NS	NS	NS	photosystem II reaction center protein B (PSBB); FUNCTIONS IN: chlorophyll binding; INVOLVED IN: photosynthesis, light reaction, photosystem II assembly; LOCATED IN: in 6 components; EXPRESSED IN: 24 plant structures; EXPRESSED DURING: 13 growth stages; CONTAINS InterPro DOMAIN/s: Photosystem antenna protein-like (InterPro:IPR000932), Photosystem II, PsbB (InterPro:IPR017486); BEST Arabidopsis th…
ATCG00280	-0.443793	N.S.	psbC		-0.443793	NS	NS	NS	NS	NS	NS	NS	NS	NS	photosystem II reaction center protein C (PSBC); FUNCTIONS IN: chlorophyll binding; INVOLVED IN: photosynthesis, light reaction; LOCATED IN: in 7 components; EXPRESSED IN: 25 plant structures; EXPRESSED DURING: 13 growth stages; CONTAINS InterPro DOMAIN/s: Photosystem antenna protein-like (InterPro:IPR000932), Photosystem II protein PsbC (InterPro:IPR005869); BEST Arabidopsis thaliana protein mat…
ATCG00270	-0.528923	N.S.	psbD		-0.528923	NS	NS	NS	NS	NS	NS	NS	NS	NS	photosystem II reaction center protein D (PSBD); FUNCTIONS IN: electron transporter, transferring electrons within the noncyclic electron transport pathway of photosynthesis activity; INVOLVED IN: photosynthetic electron transport in photosystem II, photosynthesis, light harvesting in photosystem II; LOCATED IN: in 6 components; EXPRESSED IN: 24 plant structures; EXPRESSED DURING: 13 growth stage…
ATCG00350	-0.608583	N.S.	psaA		-0.608583	NS	NS	NS	NS	NS	NS	NS	NS	NS	PSAA; FUNCTIONS IN: chlorophyll binding; INVOLVED IN: photosynthesis; LOCATED IN: in 6 components; EXPRESSED IN: 24 plant structures; EXPRESSED DURING: 13 growth stages; CONTAINS InterPro DOMAIN/s: Photosystem I, PsaA/PsaB (InterPro:IPR001280), Photosystem I psaA/psaB, conserved site (InterPro:IPR020586), Photosystem I psaA (InterPro:IPR006243); BEST Arabidopsis thaliana protein match is: Photosy…
AT1G34000	-0.614177	N.S.	OHP2	one-helix protein 2 [Source:NCBI gene (formerly Entrezgene);Acc:840297]	-0.614177	NS	NS	NS	NS	NS	NS	NS	NS	-0.390711	one-helix protein 2 (OHP2); FUNCTIONS IN: molecular_function unknown; INVOLVED IN: response to light intensity; LOCATED IN: chloroplast thylakoid membrane, chloroplast; EXPRESSED IN: 22 plant structures; EXPRESSED DURING: 13 growth stages; Has 171 Blast hits to 159 proteins in 56 species: Archae - 0; Bacteria - 5; Metazoa - 24; Fungi - 6; Plants - 64; Viruses - 16; Other Eukaryotes - 56 (source: …
ATCG00340	-0.642579	N.S.	psaB		-0.642579	NS	NS	NS	NS	NS	NS	NS	NS	NS	PSAB; FUNCTIONS IN: chlorophyll binding; INVOLVED IN: photosynthesis, light harvesting in photosystem II, photosynthesis, light harvesting in photosystem I; LOCATED IN: in 7 components; EXPRESSED IN: 25 plant structures; EXPRESSED DURING: 13 growth stages; CONTAINS InterPro DOMAIN/s: Photosystem I psaB (InterPro:IPR006244), Photosystem I, PsaA/PsaB (InterPro:IPR001280), Photosystem I psaA/psaB, c…
AT4G04040	0.91544	N.S.	MEE51	Phosphofructokinase family protein [Source:NCBI gene (formerly Entrezgene);Acc:825716]	0.91544	1.01637	0.854232	0.675855	1.03919	NS	NS	NS	NS	NS	maternal effect embryo arrest 51 (MEE51); CONTAINS InterPro DOMAIN/s: Pyrophosphate-dependent phosphofructokinase PfpB (InterPro:IPR011183), Phosphofructokinase (InterPro:IPR000023); BEST Arabidopsis thaliana protein match is: Phosphofructokinase family protein (TAIR:AT1G12000.1); Has 30201 Blast hits to 17322 proteins in 780 species: Archae - 12; Bacteria - 1396; Metazoa - 17338; Fungi - 3422; P…
ATCG00360	0.320944	N.S.			0.320944	NS	NS	NS	NS	NS	NS	NS	NS	NS	YCF3; CONTAINS InterPro DOMAIN/s: Tetratricopeptide TPR-1 (InterPro:IPR001440), Tetratricopeptide-like helical (InterPro:IPR011990), Tetratricopeptide repeat-containing (InterPro:IPR013026), Tetratricopeptide repeat (InterPro:IPR019734); BEST Arabidopsis thaliana protein match is: Tetratricopeptide repeat (TPR)-like superfamily protein (TAIR:AT3G11540.1).
GO enrichment analysis
GO-BP
Enrichment FDR	nGenes	Pathway Genes	Fold Enrichment	Pathways
0.0307854	1	3	708.41	GO:0010617 circadian reg. of calcium ion oscillation
2.72991e-07	3	9	708.41	GO:0009772 photosynthetic electron transport in photosystem II
0.0369023	1	4	531.308	GO:0051480 reg. of cytosolic calcium ion concentration
0.0376021	1	5	425.046	GO:0009584 detection of visible light
0.0376021	1	6	354.205	GO:0010018 far-red light signaling pathway
0.0376021	1	6	354.205	GO:0010148 transpiration
0.0415512	1	7	303.604	GO:0017006 protein-tetrapyrrole linkage
0.0417921	1	8	265.654	GO:0010244 response to low fluence blue light stimulus by blue low-fluence syste
7.57979e-12	6	53	240.592	GO:0018298 protein-chromophore linkage
0.0021379	2	27	157.425	GO:0010207 photosystem II assembly
3.39919e-07	4	55	154.562	GO:0009767 photosynthetic electron transport chain
2.99314e-21	12	281	90.7572	GO:0015979 photosynthesis
2.13002e-09	6	148	86.158	GO:0019684 photosynthesis light reaction
1.22329e-08	6	205	62.2019	GO:0022900 electron transport chain
9.32951e-12	9	494	38.7188	GO:0006091 generation of precursor metabolites and energy
0.0369023	2	143	29.7235	GO:0009642 response to light intensity
0.0376021	3	621	10.2668	GO:0065003 protein-containing complex assembly
0.0303765	6	2934	4.34608	GO:0006464 cellular protein modification proc.
0.0303765	6	2935	4.34459	GO:0036211 protein modification proc.
0.0376021	6	3300	3.86406	GO:0043412 macromolecule modification
GO-MF
Enrichment FDR	nGenes	Pathway Genes	Fold Enrichment	Pathways
2.45639e-07	3	11	579.608	GO:0045156 electron transporter transferring electrons within the cyclic electro
0.00999438	1	4	531.308	GO:0047334 diphosphate-fructose-6-phosphate 1-phosphotransferase activity
0.0107738	1	5	425.046	GO:0010242 oxygen evolving activity
1.4586e-10	5	34	312.534	GO:0016168 chlorophyll binding
0.0167093	1	11	193.203	GO:0003872 6-phosphofructokinase activity
0.0186421	1	13	163.479	GO:0008443 phosphofructokinase activity
0.0199285	1	16	132.827	GO:0000155 phosphorelay sensor kinase activity
0.0199285	1	17	125.014	GO:0004673 protein histidine kinase activity
6.38178e-10	6	138	92.4013	GO:0009055 electron transfer activity
0.0060238	2	100	42.5046	GO:0051539 4 iron 4 sulfur cluster binding
2.60456e-07	6	421	30.2883	GO:0046906 tetrapyrrole binding
0.00999438	2	143	29.7235	GO:0000287 magnesium ion binding
0.0109043	2	169	25.1507	GO:0051536 iron-sulfur cluster binding
0.0109043	2	169	25.1507	GO:0051540 metal cluster binding
1.83752e-06	7	1059	14.0478	GO:0003729 mRNA binding
6.23164e-05	7	1836	8.10273	GO:0003723 RNA binding
0.000351388	6	1598	7.97959	GO:0016491 oxidoreductase activity
0.00202047	8	4505	3.77399	GO:0003676 nucleic acid binding
0.0167093	6	3803	3.35298	GO:0046872 metal ion binding
0.0167093	6	3824	3.33457	GO:0043169 cation binding
GO-CC
Enrichment FDR	nGenes	Pathway Genes	Fold Enrichment	Pathways
1.48539e-08	3	9	708.41	GO:0009539 photosystem II reaction center
8.06576e-16	8	97	175.277	GO:0009521 photosystem
1.83789e-06	3	43	148.272	GO:0009522 photosystem I
4.91057e-10	5	78	136.233	GO:0009523 photosystem II
2.20391e-15	10	423	50.2419	GO:0009535 chloroplast thylakoid membrane
2.20391e-15	10	425	50.0054	GO:0055035 plastid thylakoid membrane
2.20391e-15	10	445	47.758	GO:0042651 thylakoid membrane
2.20391e-15	10	446	47.6509	GO:0034357 photosynthetic membrane
7.64851e-15	10	520	40.8698	GO:0009534 chloroplast thylakoid
7.64851e-15	10	522	40.7132	GO:0031976 plastid thylakoid
2.79501e-14	10	602	35.3028	GO:0009579 thylakoid
8.65872e-14	10	682	31.1617	GO:0042170 plastid membrane
2.37831e-10	8	638	26.6487	GO:0098796 membrane protein complex
3.36802e-12	10	995	21.3591	GO:0009526 plastid envelope
1.48569e-10	10	1472	14.4377	GO:0031984 organelle subcompartment
1.67058e-10	10	1515	14.0279	GO:0031967 organelle envelope
1.67058e-10	10	1515	14.0279	GO:0031975 envelope
1.25961e-08	10	2403	8.84407	GO:0009507 chloroplast
2.10733e-08	10	2564	8.28873	GO:0031090 organelle membrane
6.8334e-08	10	2910	7.3032	GO:0009536 plastid
TF enrichment-AGRIS
Enrichment FDR	nGenes	Pathway Genes	Fold Enrichment	Pathways
N.S.

## Sheet: S
Supplemental table S9. Lists of Col DEGs associated with GO:0015979 (Photosynthesis). These DEGs were clustered based on their relative expressions in shoots and roots. Organ-specific expression responses to spaceflight conditions are shown for the 5 genotypes included in APEX08. The results of GO- and transcription-factor target enrichment analyses are also shown in this spreadsheet. NS represen…
					DEG Expcression log2 FC (FL/GC)
	Log2FC				Root	adc1-R	OXPtADC-R	cdr7/cuao3-R	OXCuAO3-R	Shoot	adc1-S	OXPtADC-S	cdr7/cuao3-S	OXCuAO3-S	TF enrichment
Gene ID	Col-Root	Col-Shoot	Symbol	Annotation	Col	adc1	OxPtADC	cdr7/cuao3	OxCuAO3	Col	adc1	OxPtADC	cdr7/cuao3	OxCuAO3	GL3	BZIP16	PIF4	ABF2	GBF5	ABI5	AREB3
AT2G05070	N.S.	-2.02179	LHCB2.2	photosystem II light harvesting complex protein 2.2 [Source:NCBI gene (formerly Entrezgene);Acc:815055]	NS	NS	NS	NS	NS	-2.02179	-1.05505	NS	NS	NS					v	v	v
AT1G29920	N.S.	-1.84739	CAB2	chlorophyll A/B-binding protein 2 [Source:NCBI gene (formerly Entrezgene);Acc:839870]	NS	NS	NS	NS	NS	-1.84739	-1.14879	NS	NS	-0.691042		v		v	v	v	v
AT3G16250	N.S.	-1.62761	PnsB3	NDH-dependent cyclic electron flow 1 [Source:NCBI gene (formerly Entrezgene);Acc:820871]	NS	NS	NS	NS	NS	-1.62761	-1.06231	-0.889096	-1.27705	-1.09541
AT3G01440	N.S.	-1.42143	PnsL3	PsbQ-like 1 [Source:NCBI gene (formerly Entrezgene);Acc:821143]	NS	NS	NS	NS	NS	-1.42143	-1.33751	-1.14198	-1.44019	-1.57147
AT1G15980	N.S.	-1.41197	PnsB1	NDH-dependent cyclic electron flow 1 [Source:NCBI gene (formerly Entrezgene);Acc:838168]	NS	NS	NS	NS	NS	-1.41197	-1.02244	-0.69817	-0.905403	-1.17819
AT1G60600	N.S.	-1.2887	ABC4	UbiA prenyltransferase family protein [Source:NCBI gene (formerly Entrezgene);Acc:842354]	NS	NS	NS	NS	NS	-1.2887	-0.939863	NS	-1.48322	-0.990243
AT3G04790	N.S.	-1.2786	EMB3119	Ribose 5-phosphate isomerase, type A protein [Source:NCBI gene (formerly Entrezgene);Acc:819639]	NS	NS	NS	NS	NS	-1.2786	-1.00919	-0.675378	-1.14605	-1.18314
AT1G55480	N.S.	-1.27348	ZKT	protein containing PDZ domain, a K-box domain, and a TPR region [Source:NCBI gene (formerly Entrezgene);Acc:841995]	NS	NS	NS	NS	NS	-1.27348	-1.12728	-0.714913	-0.813056	-1.1833		v		v	v	v	v
AT1G19150	N.S.	-1.23739	Lhca6	PSI type II chlorophyll a/b-binding protein (Lhca2*1) [Source:NCBI gene (formerly Entrezgene);Acc:838498]	NS	NS	NS	NS	NS	-1.23739	-0.436761	-0.845725	-1.26309	-0.667407		v	v	v	v	v	v
AT2G01918	N.S.	-1.20953	PQL3	PsbQ-like 3 [Source:NCBI gene (formerly Entrezgene);Acc:3768499]	NS	NS	NS	NS	NS	-1.20953	NS	NS	NS	NS						v	v
AT4G15510	N.S.	-1.16059	PPD1	Photosystem II reaction center PsbP family protein [Source:NCBI gene (formerly Entrezgene);Acc:827223]	NS	NS	NS	NS	NS	-1.16059	-0.876472	NS	-1.02791	-0.76453
AT2G34430	N.S.	-1.14452	LHB1B1	light-harvesting chlorophyll-protein complex II subunit B1 [Source:NCBI gene (formerly Entrezgene);Acc:818006]	NS	NS	NS	NS	NS	-1.14452	-0.853313	NS	NS	NS					v	v	v
AT5G49740	N.S.	-1.12221	FRO7	ferric reduction oxidase 7 [Source:NCBI gene (formerly Entrezgene);Acc:835037]	NS	NS	NS	NS	NS	-1.12221	-0.768237	NS	NS	-0.909002
AT2G01590	N.S.	-1.11483	CRR3	chlororespiratory reduction 3 [Source:NCBI gene (formerly Entrezgene);Acc:814688]	NS	NS	NS	NS	NS	-1.11483	-0.709829	NS	-0.953526	-0.636678		v		v	v	v	v
AT5G39830	N.S.	-1.09611	DEG8	Trypsin family protein with PDZ domain-containing protein [Source:NCBI gene (formerly Entrezgene);Acc:833979]	NS	NS	NS	NS	NS	-1.09611	-0.759528	-0.573348	-1.16442	-0.87552
AT5G35220	N.S.	-1.08783	EGY1	Peptidase M50 family protein [Source:NCBI gene (formerly Entrezgene);Acc:833476]	NS	NS	NS	NS	NS	-1.08783	-0.739369	NS	-0.985346	-0.999675
AT1G77090	N.S.	-1.08722	AT1G77090	thylakoid lumenal protein (Mog1/PsbP/DUF1795-like photosystem II reaction center PsbP family protein) [Source:NCBI gene (formerly Entrezgene);Acc:844043]	NS	NS	NS	NS	NS	-1.08722	-0.869936	-0.805487	-1.10229	-0.60903							v
AT5G66190	N.S.	-1.0821	FNR1	ferredoxin-NADP[+]-oxidoreductase 1 [Source:NCBI gene (formerly Entrezgene);Acc:836751]	NS	NS	NS	NS	NS	-1.0821	-0.825424	NS	-0.873041	-0.773421
AT4G35250	N.S.	-1.04869	HCF244	NAD(P)-binding Rossmann-fold superfamily protein [Source:NCBI gene (formerly Entrezgene);Acc:829678]	NS	NS	NS	NS	NS	-1.04869	-0.670312	-0.950655	-0.617312	-0.92786		v	v	v	v
AT4G02530	N.S.	-1.04684	AT4G02530	chloroplast thylakoid lumen protein [Source:NCBI gene (formerly Entrezgene);Acc:827927]	NS	NS	NS	NS	NS	-1.04684	-0.868091	-0.665302	-0.80401	-0.850566			v
AT1G70760	N.S.	-1.03521	NdhL	inorganic carbon transport protein-like protein [Source:NCBI gene (formerly Entrezgene);Acc:843413]	NS	NS	NS	NS	NS	-1.03521	-0.904595	-0.712826	NS	-0.995565		v				v	v
AT1G64770	N.S.	-1.03006	PnsB2	NDH-dependent cyclic electron flow 1 [Source:NCBI gene (formerly Entrezgene);Acc:842785]	NS	NS	NS	NS	NS	-1.03006	-0.922772	-0.667329	-0.729071	-1.12061
AT5G44650	N.S.	-1.028	CEST	death domain associated protein [Source:NCBI gene (formerly Entrezgene);Acc:834494]	NS	NS	NS	NS	NS	-1.028	-1.11572	-0.545095	-0.756934	-1.0297
At5g44650	N.S.	-1.028	CEST	death domain associated protein [Source:NCBI gene (formerly Entrezgene);Acc:834494]	NS	NS	NS	NS	NS	-1.028	-1.11572	-0.545095	-0.756934	-1.0297
AT2G15820	N.S.	-1.02231	OTP51	endonuclease [Source:NCBI gene (formerly Entrezgene);Acc:816078]	NS	NS	NS	NS	NS	-1.02231	-0.928762	NS	NS	-0.770756
AT1G14150	N.S.	-1.00128	PnsL2	PsbQ-like 2 [Source:NCBI gene (formerly Entrezgene);Acc:837974]	NS	NS	NS	NS	NS	-1.00128	-0.52594	-0.60017	NS	-0.61916						v	v
AT2G46820	N.S.	-0.976648	PSI-P	photosystem I P subunit [Source:NCBI gene (formerly Entrezgene);Acc:819295]	NS	NS	NS	NS	NS	-0.976648	-0.816052	-0.625431	-0.846999	-0.814435		v	v	v	v	v	v
AT2G28605	N.S.	-0.974056	AT2G28605	Photosystem II reaction center PsbP family protein [Source:NCBI gene (formerly Entrezgene);Acc:817409]	NS	NS	NS	NS	NS	-0.974056	-0.722225	NS	NS	-0.586553
AT5G54180	N.S.	-0.962129	PTAC15	plastid transcriptionally active 15 [Source:NCBI gene (formerly Entrezgene);Acc:835506]	NS	NS	NS	NS	NS	-0.962129	NS	NS	-0.824168	NS	v
AT4G22890	N.S.	-0.939207	PGR5-LIKE	PGR5-LIKE A [Source:NCBI gene (formerly Entrezgene);Acc:828388]	NS	NS	NS	NS	NS	-0.939207	-0.508494	NS	-0.753004	-0.643153
AT1G54780	N.S.	-0.938911	TLP18.3	thylakoid lumen 18.3 kDa protein [Source:NCBI gene (formerly Entrezgene);Acc:841919]	NS	NS	NS	NS	NS	-0.938911	-0.868134	-0.570629	NS	-0.903372
AT1G45474	N.S.	-0.919276	Lhca5	photosystem I light harvesting complex protein 5 [Source:NCBI gene (formerly Entrezgene);Acc:841099]	NS	NS	NS	NS	NS	-0.919276	-0.555845	-0.598615	NS	-0.607595		v		v	v	v	v
AT5G02120	N.S.	-0.915721	OHP	one helix protein [Source:NCBI gene (formerly Entrezgene);Acc:831799]	NS	NS	NS	NS	NS	-0.915721	-0.655027	NS	-0.701922	-0.753216				v
AT1G18730	N.S.	-0.906498	PnsB4	NDH dependent flow 6 [Source:NCBI gene (formerly Entrezgene);Acc:838455]	NS	NS	NS	NS	NS	-0.906498	-0.542423	NS	-0.586463	-0.526446	v		v
AT3G27925	N.S.	-0.905944	DEG1	DegP protease 1 [Source:NCBI gene (formerly Entrezgene);Acc:822416]	NS	NS	NS	NS	NS	-0.905944	-0.723788	NS	NS	-1.01357
AT3G58830	N.S.	-0.887207	AT3G58830	haloacid dehalogenase (HAD) superfamily protein [Source:NCBI gene (formerly Entrezgene);Acc:825052]	NS	NS	NS	NS	NS	-0.887207	NS	NS	NS	NS				v		v	v
AT5G38410	N.S.	-0.874803	RBCS3B	Ribulose bisphosphate carboxylase (small chain) family protein [Source:NCBI gene (formerly Entrezgene);Acc:833828]	NS	NS	NS	NS	NS	-0.874803	-0.511275	NS	NS	-0.677739		v		v
AT3G55250	N.S.	-0.842821	PDE329	calcium homeostasis regulator [Source:NCBI gene (formerly Entrezgene);Acc:824691]	NS	NS	NS	NS	NS	-0.842821	-0.662087	NS	-0.567499	NS
AT2G39470	N.S.	-0.82778	PnsL1	PsbP-like protein 2 [Source:NCBI gene (formerly Entrezgene);Acc:818532]	NS	NS	NS	NS	NS	-0.82778	-0.580754	-0.575586	-0.663486	-0.741972
AT5G64040	N.S.	-0.821696	PSAN	photosystem I reaction center subunit PSI-N, chloroplast, putative / PSI-N, putative (PSAN) [Source:NCBI gene (formerly Entrezgene);Acc:836525]	NS	NS	NS	NS	NS	-0.821696	-0.505037	NS	NS	NS		v		v	v
AT3G21200	N.S.	-0.821	PGR7	proton gradient regulation 7 [Source:NCBI gene (formerly Entrezgene);Acc:821673]	NS	NS	NS	NS	NS	-0.821	-0.620383	NS	NS	-0.697336	v
AT3G01480	N.S.	-0.800186	CYP38	cyclophilin 38 [Source:NCBI gene (formerly Entrezgene);Acc:821137]	NS	NS	NS	NS	NS	-0.800186	-0.717235	NS	-0.637164	-0.702004			v
AT1G55370	N.S.	-0.795386	NDF5	NDH-dependent cyclic electron flow 5 [Source:NCBI gene (formerly Entrezgene);Acc:841984]	NS	NS	NS	NS	NS	-0.795386	NS	NS	NS	NS						v
AT1G20950	N.S.	-0.779858	AT1G20950	Phosphofructokinase family protein [Source:NCBI gene (formerly Entrezgene);Acc:838689]	NS	NS	NS	NS	NS	-0.779858	NS	NS	-0.92203	-0.666129
AT3G54050	N.S.	-0.732416	HCEF1	high cyclic electron flow 1 [Source:NCBI gene (formerly Entrezgene);Acc:824572]	NS	NS	NS	NS	NS	-0.732416	-0.541216	NS	-0.687327	-0.668052						v	v
AT2G34860	N.S.	-0.729282	EDA3	DnaJ/Hsp40 cysteine-rich domain superfamily protein [Source:NCBI gene (formerly Entrezgene);Acc:818051]	NS	NS	NS	NS	NS	-0.729282	-0.392329	NS	NS	-0.58884
AT4G33520	N.S.	-0.725663	PAA1	P-type ATP-ase 1 [Source:NCBI gene (formerly Entrezgene);Acc:829490]	NS	NS	NS	NS	NS	-0.725663	NS	NS	NS	-0.482306	v
AT5G08410	N.S.	-0.688957	FTRA2	ferredoxin/thioredoxin reductase subunit A (variable subunit) 2 [Source:NCBI gene (formerly Entrezgene);Acc:830739]	NS	NS	NS	NS	NS	-0.688957	NS	NS	NS	NS
AT1G73060	N.S.	-0.667791	LPA3	Low PSII Accumulation 3 [Source:NCBI gene (formerly Entrezgene);Acc:843637]	NS	NS	NS	NS	NS	-0.667791	-0.531479	NS	NS	-0.708731		v	v			v	v
AT2G40100	N.S.	-0.642705	LHCB4.3	light harvesting complex photosystem II [Source:NCBI gene (formerly Entrezgene);Acc:818599]	NS	NS	NS	NS	NS	-0.642705	NS	NS	NS	-0.863944		v		v	v	v	v
AT1G56190	N.S.	-0.622873	AT1G56190	Phosphoglycerate kinase family protein [Source:NCBI gene (formerly Entrezgene);Acc:842072]	NS	NS	NS	NS	NS	-0.622873	-0.496279	NS	-0.650537	-0.717404						v
AT1G03600	N.S.	-0.621885	PSB27	photosystem II family protein [Source:NCBI gene (formerly Entrezgene);Acc:839449]	NS	NS	NS	NS	NS	-0.621885	-0.362794	NS	NS	-0.489342		v	v	v	v	v	v
AT3G56650	N.S.	-0.616684	PPD6	thylakoid lumenal protein (Mog1/PsbP/DUF1795-like photosystem II reaction center PsbP family protein) [Source:NCBI gene (formerly Entrezgene);Acc:824832]	NS	NS	NS	NS	NS	-0.616684	-0.538625	NS	NS	NS
AT2G31040	N.S.	-0.613662	AT2G31040	ATP synthase protein I-like protein [Source:NCBI gene (formerly Entrezgene);Acc:817656]	NS	NS	NS	NS	NS	-0.613662	-0.484458	NS	NS	-0.417741
AT2G47940	N.S.	-0.609867	DEG2	DEGP protease 2 [Source:NCBI gene (formerly Entrezgene);Acc:819406]	NS	NS	NS	NS	NS	-0.609867	-0.668159	-0.568556	NS	-0.725279			v
AT2G45770	N.S.	-0.598861	CPFTSY	signal recognition particle receptor protein, chloroplast (FTSY) [Source:NCBI gene (formerly Entrezgene);Acc:819185]	NS	NS	NS	NS	NS	-0.598861	-0.611466	NS	NS	-0.846142
AT3G55330	N.S.	-0.589624	PPL1	PsbP-like protein 1 [Source:NCBI gene (formerly Entrezgene);Acc:824699]	NS	NS	NS	NS	NS	-0.589624	-0.453666	NS	NS	-0.589743
AT1G11750	N.S.	-0.571695	CLPP6	CLP protease proteolytic subunit 6 [Source:NCBI gene (formerly Entrezgene);Acc:837719]	NS	NS	NS	NS	NS	-0.571695	-0.511652	NS	NS	-0.655783
AT4G05180	N.S.	-0.566285	PSBQ-2	photosystem II subunit Q-2 [Source:NCBI gene (formerly Entrezgene);Acc:825866]	NS	NS	NS	NS	NS	-0.566285	NS	NS	NS	NS			v			v	v
AT3G60370	N.S.	-0.554169	AT3G60370	FKBP-like peptidyl-prolyl cis-trans isomerase family protein [Source:NCBI gene (formerly Entrezgene);Acc:825208]	NS	NS	NS	NS	NS	-0.554169	NS	NS	NS	NS	v
AT4G01037	N.S.	-0.552762	WTF1	Ubiquitin carboxyl-terminal hydrolase family protein [Source:NCBI gene (formerly Entrezgene);Acc:6240517]	NS	NS	NS	NS	NS	-0.552762	-0.600799	NS	NS	-0.553028
AT1G76450	N.S.	-0.542212	AT1G76450	Photosystem II reaction center PsbP family protein [Source:NCBI gene (formerly Entrezgene);Acc:843978]	NS	NS	NS	NS	NS	-0.542212	-0.556113	NS	NS	-0.554119
AT1G43670	N.S.	-0.527894	FBP	Inositol monophosphatase family protein [Source:NCBI gene (formerly Entrezgene);Acc:840953]	NS	NS	NS	NS	NS	-0.527894	-0.366839	NS	NS	NS		v		v	v	v	v
AT4G19100	N.S.	-0.516919	PAM68	PAM68-like protein (DUF3464) [Source:NCBI gene (formerly Entrezgene);Acc:2745715]	NS	NS	NS	NS	NS	-0.516919	NS	NS	NS	NS
AT4G02260	N.S.	-0.512912	RSH1	RELA/SPOT homolog 1 [Source:NCBI gene (formerly Entrezgene);Acc:828096]	NS	NS	NS	NS	NS	-0.512912	NS	NS	NS	NS
AT1G22700	N.S.	-0.498726	AT1G22700	Tetratricopeptide repeat (TPR)-like superfamily protein [Source:NCBI gene (formerly Entrezgene);Acc:838876]	NS	NS	NS	NS	NS	-0.498726	NS	NS	NS	NS
AT3G01500	N.S.	-0.498253	CA1	carbonic anhydrase 1 [Source:NCBI gene (formerly Entrezgene);Acc:821134]	NS	NS	NS	NS	NS	-0.498253	-0.615394	NS	NS	-0.942452	v		v
AT5G61410	N.S.	-0.403629	RPE	D-ribulose-5-phosphate-3-epimerase [Source:NCBI gene (formerly Entrezgene);Acc:836262]	NS	NS	NS	NS	NS	-0.403629	NS	NS	NS	NS
AT1G54500	N.S.	-0.393695	AT1G54500	Rubredoxin-like superfamily protein [Source:NCBI gene (formerly Entrezgene);Acc:841892]	NS	NS	NS	NS	NS	-0.393695	-0.41311	NS	NS	NS						v
AT5G21930	N.S.	0.420724	PAA2	P-type ATPase of Arabidopsis 2 [Source:NCBI gene (formerly Entrezgene);Acc:832253]	NS	NS	NS	NS	0.556921	0.420724	0.548356	NS	0.544372	0.487139		v			v
ATCG00700	N.S.	0.454119	psbN		NS	NS	NS	NS	NS	0.454119	NS	NS	NS	NS
AT2G45290	N.S.	0.557985	AT2G45290	Transketolase [Source:NCBI gene (formerly Entrezgene);Acc:819137]	NS	NS	NS	NS	NS	0.557985	NS	NS	NS	NS	v
AT3G56090	N.S.	0.674996	FER3	ferritin 3 [Source:NCBI gene (formerly Entrezgene);Acc:824775]	NS	NS	NS	NS	NS	0.674996	0.573785	NS	NS	NS						v	v
GO enrichment analysis
GO-BP
Enrichment FDR	nGenes	Pathway Genes	Fold Enrichment	Pathways
9.59985e-21	10	17	225.719	GO:0009773 photosynthetic electron transport in photosystem I
5.30688e-14	7	13	206.62	GO:0010206 photosystem II repair
5.36857e-13	7	17	158.003	GO:0048564 photosystem I assembly
6.29057e-37	20	55	139.535	GO:0009767 photosynthetic electron transport chain
2.13765e-23	13	37	134.821	GO:0009765 photosynthesis light harvesting
8.67537e-16	9	27	127.907	GO:0010207 photosystem II assembly
8.05559e-87	46	148	119.265	GO:0019684 photosynthesis light reaction
3.87868e-10	6	21	109.635	GO:0019253 reductive pentose-phosphate cycle
3.87868e-10	6	21	109.635	GO:0019685 photosynthesis dark reaction
6.76326e-10	6	23	100.101	GO:0009768 photosynthesis light harvesting in photosystem I
1.84721e-11	7	27	99.4835	GO:0030091 protein repair
1.03729e-134	69	281	94.2236	GO:0015979 photosynthesis
2.23537e-09	6	28	82.2262	GO:0015977 carbon fixation
2.19487e-09	7	53	50.6803	GO:0018298 protein-chromophore linkage
4.61874e-71	51	494	39.615	GO:0006091 generation of precursor metabolites and energy
3.44567e-26	21	205	39.3081	GO:0022900 electron transport chain
2.3117e-07	10	319	12.0289	GO:0009657 plastid organization
9.55217e-13	18	621	11.1224	GO:0065003 protein-containing complex assembly
6.69719e-12	18	700	9.86714	GO:0043933 protein-containing complex organization
1.2637e-10	19	968	7.53174	GO:0022607 cellular component assembly
GO-MF
Enrichment FDR	nGenes	Pathway Genes	Fold Enrichment	Pathways
0.000393645	2	3	255.815	GO:0043682 P-type divalent copper transporter activity
0.000698631	2	4	191.861	GO:0042132 fructose 1,6-bisphosphate 1-phosphatase activity
3.73849e-09	5	11	174.419	GO:0045156 electron transporter transferring electrons within the cyclic electro
0.00249392	2	9	85.2716	GO:0047938 glucose-6-phosphate 1-epimerase activity
4.83093e-10	7	34	79.0016	GO:0016168 chlorophyll binding
0.00335056	2	11	69.7677	GO:0016730 oxidoreductase activity acting on iron-sulfur proteins as donors
0.0037909	2	12	63.9537	GO:0005375 copper ion transmembrane transporter activity
0.00568471	2	15	51.163	GO:0050308 sugar-phosphatase activity
0.00137425	3	33	34.8838	GO:0016857 racemase and epimerase activity acting on carbohydrates and derivativ
6.38344e-07	6	68	33.8578	GO:0019904 protein domain specific binding
0.00203476	3	41	28.0772	GO:0016854 racemase and epimerase activity
1.6775e-06	7	138	19.4642	GO:0009055 electron transfer activity
4.65427e-09	11	264	15.9884	GO:0005509 calcium ion binding
0.00335056	4	127	12.0857	GO:0004252 serine-type endopeptidase activity
0.0124906	4	194	7.9118	GO:0008236 serine-type peptidase activity
0.00168446	6	298	7.72595	GO:0016853 isomerase activity
0.00162717	7	421	6.38018	GO:0046906 tetrapyrrole binding
0.00249392	13	1598	3.12165	GO:0016491 oxidoreductase activity
2.03878e-07	30	3803	3.027	GO:0046872 metal ion binding
2.03878e-07	30	3824	3.01037	GO:0043169 cation binding
GO-CC
Enrichment FDR	nGenes	Pathway Genes	Fold Enrichment	Pathways
2.06932e-39	22	78	108.229	GO:0009523 photosystem II
6.76394e-25	14	51	105.336	GO:0009543 chloroplast thylakoid lumen
6.76394e-25	14	51	105.336	GO:0031978 plastid thylakoid lumen
1.69415e-41	24	97	94.9416	GO:0009521 photosystem
7.1719e-31	18	74	93.3378	GO:0031977 thylakoid lumen
1.61789e-74	51	445	43.9772	GO:0042651 thylakoid membrane
1.61789e-74	51	446	43.8786	GO:0034357 photosynthetic membrane
2.64006e-69	48	423	43.5429	GO:0009535 chloroplast thylakoid membrane
2.93155e-69	48	425	43.338	GO:0055035 plastid thylakoid membrane
1.92439e-79	55	520	40.586	GO:0009534 chloroplast thylakoid
1.92439e-79	55	522	40.4305	GO:0031976 plastid thylakoid
7.30855e-80	57	602	36.3325	GO:0009579 thylakoid
5.211e-67	52	682	29.2574	GO:0042170 plastid membrane
4.92739e-66	56	995	21.5964	GO:0009526 plastid envelope
9.05787e-55	55	1472	14.3374	GO:0031984 organelle subcompartment
8.07715e-56	56	1515	14.1838	GO:0031967 organelle envelope
8.07715e-56	56	1515	14.1838	GO:0031975 envelope
5.27453e-71	70	2403	11.1779	GO:0009507 chloroplast
2.1814e-65	70	2910	9.23043	GO:0009536 plastid
2.35388e-37	52	2564	7.7822	GO:0031090 organelle membrane
					TF Expression Log2 FC (FL/GC)
TF enrichment-AGRIS						Root					Shoot
Enrichment FDR	nGenes	Pathway Genes	Fold Enrichment	Pathways	Gene ID	Col	adc1	OxPtADC	cdr7/cuao3	OxCuAO3	Col	adc1	OxPtADC	cdr7/cuao3	OxCuAO3
0.0473796	7	700	3.83722	GL3 target	AT5G41315	NS	NS	NS	NS	NS	NS	NS	NS	NS	-2.08575
0.000256898	16	1631	3.76429	BZIP16 target	AT2G35530	NS	NS	NS	NS	NS	NS	NS	NS	NS	NS
0.0473796	11	1539	2.74265	PIF4 target	AT2G43010	NS	NS	NS	NS	NS	NS	NS	NS	NS	NS
0.0109096	15	2112	2.7253	ABF2 target	AT1G45249	-0.34824	NS	NS	NS	NS	NS	-0.656886	NS	NS	-0.499802
0.0185501	15	2268	2.53785	GBF5 target	AT2G18160	0.370009	NS	NS	NS	NS	NS	NS	NS	NS	-0.450046
0.000256898	27	4189	2.47326	ABI5 target	AT2G36270	NS	NS	NS	NS	NS	2.13882	1.85488	NS	NS	NS
0.00051021	25	3936	2.43726	AREB3 target	AT3G56850	NS	NS	NS	NS	NS	0.498549	NS	NS	NS	NS
