# Supplementary material
Source: Research Square preprint supplement (doi:10.21203/rs.3.rs-9349369/v1)
Supplement: Supplementary file 9 [file 7245bad97a4a4dadc24e11ba.xlsx]

## Sheet: Supplemental table S10.
Supplemental Table S10. Shoot expression responses to spaceflight conditions of photosynthesis-related genes. Expression responses to spaceflight conditions of genes associated with GO:0015979 (Photosynthesis) and GO:0010109 (Regulation of Photosynthesis) are shown for the 5 genotypes included in APEX08 along with their annotations. NS represents no significance. These data are illustrated in Fig…
Photosynthesis (GO:0015979)
	Log2FC
Gene ID	Col-S	adc1-S	OxCuAO3-S	cdr7/cuao3-S	OxPtADC-S	Anotation
AT2G05100	-2.29777	-1.26368	N.S.	N.S.	N.S.	LHCB2.1	photosystem II light harvesting complex protein 2.1 [Source:NCBI gene (formerly Entrezgene);Acc:815058]
AT3G27690	-2.25274	-1.61151	-1.36609	N.S.	N.S.	LHCB2.3	photosystem II light harvesting complex protein 2.3 [Source:NCBI gene (formerly Entrezgene);Acc:822391]
AT5G24120	-2.12913	-1.63363	-1.71833	-1.69563	N.S.	SIGE	sigma factor E [Source:NCBI gene (formerly Entrezgene);Acc:832477]
AT2G05070	-2.02179	-1.05505	N.S.	N.S.	N.S.	LHCB2.2	photosystem II light harvesting complex protein 2.2 [Source:NCBI gene (formerly Entrezgene);Acc:815055]
AT1G29920	-1.84739	-1.14879	-0.691042	N.S.	N.S.	CAB2	chlorophyll A/B-binding protein 2 [Source:NCBI gene (formerly Entrezgene);Acc:839870]
AT3G16250	-1.62761	-1.06231	-1.09541	-1.03207	-0.889096	PnsB3	NDH-dependent cyclic electron flow 1 [Source:NCBI gene (formerly Entrezgene);Acc:820871]
AT5G54270	-1.50951	-0.787225	N.S.	N.S.	N.S.	LHCB3	light-harvesting chlorophyll B-binding protein 3 [Source:NCBI gene (formerly Entrezgene);Acc:835515]
AT3G01440	-1.42143	-1.33751	-1.57147	-0.990125	-1.14198	PnsL3	PsbQ-like 1 [Source:NCBI gene (formerly Entrezgene);Acc:821143]
AT1G15820	-1.41315	-0.916388	-0.753782	N.S.	N.S.	LHCB6	light harvesting complex photosystem II subunit 6 [Source:NCBI gene (formerly Entrezgene);Acc:838151]
AT1G15980	-1.41197	-1.02244	-1.17819	-0.786802	-0.69817	PnsB1	NDH-dependent cyclic electron flow 1 [Source:NCBI gene (formerly Entrezgene);Acc:838168]
AT4G09650	-1.29868	-1.00798	-0.892349	-0.768274	N.S.	ATPD	F-type H+-transporting ATPase subunit delta [Source:NCBI gene (formerly Entrezgene);Acc:826551]
AT1G60600	-1.2887	-0.939863	-0.990243	-0.688491	N.S.	ABC4	UbiA prenyltransferase family protein [Source:NCBI gene (formerly Entrezgene);Acc:842354]
AT3G04790	-1.2786	-1.00919	-1.18314	-0.864513	-0.675378	EMB3119	Ribose 5-phosphate isomerase, type A protein [Source:NCBI gene (formerly Entrezgene);Acc:819639]
AT1G29910	-1.27798	-0.674807	N.S.	N.S.	N.S.	CAB3	chlorophyll A/B binding protein 3 [Source:NCBI gene (formerly Entrezgene);Acc:839869]
AT1G55480	-1.27348	-1.12728	-1.1833	-0.957566	-0.714913	ZKT	protein containing PDZ domain, a K-box domain, and a TPR region [Source:NCBI gene (formerly Entrezgene);Acc:841995]
AT1G19150	-1.23739	-0.436761	-0.667407	-0.770515	-0.845725	Lhca6	PSI type II chlorophyll a/b-binding protein (Lhca2*1) [Source:NCBI gene (formerly Entrezgene);Acc:838498]
AT2G01918	-1.20953	N.S.	N.S.	N.S.	N.S.	PQL3	PsbQ-like 3 [Source:NCBI gene (formerly Entrezgene);Acc:3768499]
AT1G08380	-1.20832	-0.564063	N.S.	-0.753569	N.S.	PSAO	photosystem I subunit O [Source:NCBI gene (formerly Entrezgene);Acc:837358]
AT4G15510	-1.16059	-0.876472	-0.76453	-0.758468	N.S.	PPD1	Photosystem II reaction center PsbP family protein [Source:NCBI gene (formerly Entrezgene);Acc:827223]
AT2G34430	-1.14452	-0.853313	N.S.	N.S.	N.S.	LHB1B1	light-harvesting chlorophyll-protein complex II subunit B1 [Source:NCBI gene (formerly Entrezgene);Acc:818006]
AT4G21280	-1.14352	-0.565204	-0.540009	-0.758438	N.S.	PSBQA	photosystem II subunit QA [Source:NCBI gene (formerly Entrezgene);Acc:827877]
AT5G49740	-1.12221	-0.768237	-0.909002	N.S.	N.S.	FRO7	ferric reduction oxidase 7 [Source:NCBI gene (formerly Entrezgene);Acc:835037]
AT2G01590	-1.11483	-0.709829	-0.636678	-0.690014	N.S.	CRR3	chlororespiratory reduction 3 [Source:NCBI gene (formerly Entrezgene);Acc:814688]
AT5G39830	-1.09611	-0.759528	-0.87552	-0.605621	-0.573348	DEG8	Trypsin family protein with PDZ domain-containing protein [Source:NCBI gene (formerly Entrezgene);Acc:833979]
AT5G57030	-1.08847	-0.710249	-0.772887	-0.621981	N.S.	LUT2	Lycopene beta/epsilon cyclase protein [Source:NCBI gene (formerly Entrezgene);Acc:835806]
AT5G35220	-1.08783	-0.739369	-0.999675	-0.654912	N.S.	EGY1	Peptidase M50 family protein [Source:NCBI gene (formerly Entrezgene);Acc:833476]
AT1G77090	-1.08722	-0.869936	-0.60903	-0.770271	-0.805487	AT1G77090	thylakoid lumenal protein (Mog1/PsbP/DUF1795-like photosystem II reaction center PsbP family protein) [Source:NCBI gene (formerly Entrezgene);Acc:844043]
AT5G66190	-1.0821	-0.825424	-0.773421	-0.611172	N.S.	FNR1	ferredoxin-NADP[+]-oxidoreductase 1 [Source:NCBI gene (formerly Entrezgene);Acc:836751]
AT1G12900	-1.05345	-0.506359	-0.662941	N.S.	N.S.	GAPA-2	glyceraldehyde 3-phosphate dehydrogenase A subunit 2 [Source:NCBI gene (formerly Entrezgene);Acc:837848]
AT3G54890	-1.05025	-0.632086	N.S.	-0.852777	-0.870042	LHCA1	chlorophyll a-b binding protein 6 [Source:NCBI gene (formerly Entrezgene);Acc:824654]
AT4G35250	-1.04869	-0.670312	-0.92786	-0.656498	-0.950655	HCF244	NAD(P)-binding Rossmann-fold superfamily protein [Source:NCBI gene (formerly Entrezgene);Acc:829678]
AT4G02530	-1.04684	-0.868091	-0.850566	-0.647924	-0.665302	AT4G02530	chloroplast thylakoid lumen protein [Source:NCBI gene (formerly Entrezgene);Acc:827927]
AT1G70760	-1.03521	-0.904595	-0.995565	N.S.	-0.712826	NdhL	inorganic carbon transport protein-like protein [Source:NCBI gene (formerly Entrezgene);Acc:843413]
AT1G64770	-1.03006	-0.922772	-1.12061	-0.765785	-0.667329	PnsB2	NDH-dependent cyclic electron flow 1 [Source:NCBI gene (formerly Entrezgene);Acc:842785]
AT5G44650	-1.028	-1.11572	-1.0297	-0.525768	-0.545095	CEST	death domain associated protein [Source:NCBI gene (formerly Entrezgene);Acc:834494]
AT1G27730	-1.02375	N.S.	N.S.	N.S.	N.S.	STZ	salt tolerance zinc finger [Source:NCBI gene (formerly Entrezgene);Acc:839666]
AT2G15820	-1.02231	-0.928762	-0.770756	N.S.	N.S.	OTP51	endonuclease [Source:NCBI gene (formerly Entrezgene);Acc:816078]
AT1G06680	-1.0177	-0.64933	-0.535082	-0.798131	N.S.	PSBP-1	photosystem II subunit P-1 [Source:NCBI gene (formerly Entrezgene);Acc:837178]
AT1G14150	-1.00128	-0.52594	-0.61916	N.S.	-0.60017	PnsL2	PsbQ-like 2 [Source:NCBI gene (formerly Entrezgene);Acc:837974]
AT2G46820	-0.976648	-0.816052	-0.814435	-0.698845	-0.625431	PSI-P	photosystem I P subunit [Source:NCBI gene (formerly Entrezgene);Acc:819295]
AT2G28605	-0.974056	-0.722225	-0.586553	N.S.	N.S.	AT2G28605	Photosystem II reaction center PsbP family protein [Source:NCBI gene (formerly Entrezgene);Acc:817409]
AT5G54180	-0.962129	N.S.	N.S.	-0.683295	N.S.	PTAC15	plastid transcriptionally active 15 [Source:NCBI gene (formerly Entrezgene);Acc:835506]
AT4G22890	-0.939207	-0.508494	-0.643153	-0.704902	N.S.	PGR5-LIKE A	PGR5-LIKE A [Source:NCBI gene (formerly Entrezgene);Acc:828388]
AT1G54780	-0.938911	-0.868134	-0.903372	N.S.	-0.570629	TLP18.3	thylakoid lumen 18.3 kDa protein [Source:NCBI gene (formerly Entrezgene);Acc:841919]
AT2G21970	-0.930402	-0.538381	-0.6932	-0.683108	N.S.	SEP2	stress enhanced protein 2 [Source:NCBI gene (formerly Entrezgene);Acc:816733]
AT2G34420	-0.919806	-0.436028	N.S.	N.S.	N.S.	LHB1B2	photosystem II light harvesting complex protein B1B2 [Source:NCBI gene (formerly Entrezgene);Acc:818005]
AT1G45474	-0.919276	-0.555845	-0.607595	N.S.	-0.598615	Lhca5	photosystem I light harvesting complex protein 5 [Source:NCBI gene (formerly Entrezgene);Acc:841099]
AT5G02120	-0.915721	-0.655027	-0.753216	-0.726107	N.S.	OHP	one helix protein [Source:NCBI gene (formerly Entrezgene);Acc:831799]
AT1G18730	-0.906498	-0.542423	-0.526446	-0.611627	N.S.	PnsB4	NDH dependent flow 6 [Source:NCBI gene (formerly Entrezgene);Acc:838455]
AT3G27925	-0.905944	-0.723788	-1.01357	N.S.	N.S.	DEG1	DegP protease 1 [Source:NCBI gene (formerly Entrezgene);Acc:822416]
AT1G16720	-0.904159	-0.820687	-1.073	-0.457519	-0.689352	HCF173	high chlorophyll fluorescence phenotype 173 [Source:NCBI gene (formerly Entrezgene);Acc:838243]
AT2G20890	-0.896477	-0.734249	-0.754134	-0.473881	N.S.	PSB29	photosystem II reaction center PSB29 protein [Source:NCBI gene (formerly Entrezgene);Acc:816623]
AT3G58830	-0.887207	N.S.	N.S.	N.S.	N.S.	AT3G58830	haloacid dehalogenase (HAD) superfamily protein [Source:NCBI gene (formerly Entrezgene);Acc:825052]
AT1G29930	-0.883642	-0.720207	N.S.	-0.654002	N.S.	CAB1	chlorophyll A/B binding protein 1 [Source:NCBI gene (formerly Entrezgene);Acc:839871]
AT5G38410	-0.874803	-0.511275	-0.677739	N.S.	N.S.	RBCS3B	Ribulose bisphosphate carboxylase (small chain) family protein [Source:NCBI gene (formerly Entrezgene);Acc:833828]
AT3G55250	-0.842821	-0.662087	N.S.	-0.454156	N.S.	PDE329	calcium homeostasis regulator [Source:NCBI gene (formerly Entrezgene);Acc:824691]
AT1G67740	-0.834424	-0.917054	-0.865785	-0.662482	N.S.	PSBY	photosystem II BY [Source:NCBI gene (formerly Entrezgene);Acc:843099]
AT2G39470	-0.82778	-0.580754	-0.741972	-0.499871	-0.575586	PnsL1	PsbP-like protein 2 [Source:NCBI gene (formerly Entrezgene);Acc:818532]
AT5G64040	-0.821696	-0.505037	N.S.	N.S.	N.S.	PSAN	photosystem I reaction center subunit PSI-N, chloroplast, putative / PSI-N, putative (PSAN) [Source:NCBI gene (formerly Entrezgene);Acc:836525]
AT3G21200	-0.821	-0.620383	-0.697336	N.S.	N.S.	PGR7	proton gradient regulation 7 [Source:NCBI gene (formerly Entrezgene);Acc:821673]
AT3G01480	-0.800186	-0.717235	-0.702004	-0.550209	N.S.	CYP38	cyclophilin 38 [Source:NCBI gene (formerly Entrezgene);Acc:821137]
AT1G55370	-0.795386	N.S.	N.S.	N.S.	N.S.	NDF5	NDH-dependent cyclic electron flow 5 [Source:NCBI gene (formerly Entrezgene);Acc:841984]
AT1G20020	-0.788816	-0.453335	N.S.	N.S.	N.S.	FNR2	ferredoxin-NADP[+]-oxidoreductase 2 [Source:NCBI gene (formerly Entrezgene);Acc:838591]
AT4G04640	-0.787832	-0.476338	-0.578405	N.S.	N.S.	ATPC1	ATPase, F1 complex, gamma subunit protein [Source:NCBI gene (formerly Entrezgene);Acc:825797]
AT3G12780	-0.786709	-0.630878	-0.679243	-0.55355	N.S.	PGK1	phosphoglycerate kinase 1 [Source:NCBI gene (formerly Entrezgene);Acc:820461]
AT1G67090	-0.781581	-0.63245	-0.814754	N.S.	N.S.	RBCS1A	ribulose bisphosphate carboxylase small chain 1A [Source:NCBI gene (formerly Entrezgene);Acc:843029]
AT1G20950	-0.779858	N.S.	-0.666129	-0.632774	N.S.	AT1G20950	Phosphofructokinase family protein [Source:NCBI gene (formerly Entrezgene);Acc:838689]
AT1G32060	-0.779435	-0.608954	-0.721212	-0.614604	N.S.	PRK	phosphoribulokinase [Source:NCBI gene (formerly Entrezgene);Acc:840098]
AT3G47470	-0.775864	-0.451938	N.S.	N.S.	N.S.	LHCA4	light-harvesting chlorophyll-protein complex I subunit A4 [Source:NCBI gene (formerly Entrezgene);Acc:823901]
AT1G60950	-0.763954	N.S.	N.S.	N.S.	N.S.	FED A	2Fe-2S ferredoxin-like superfamily protein [Source:NCBI gene (formerly Entrezgene);Acc:842386]
AT3G50820	-0.754887	-0.646288	-0.649093	-0.616814	N.S.	PSBO2	photosystem II subunit O-2 [Source:NCBI gene (formerly Entrezgene);Acc:824246]
AT5G66570	-0.733041	-0.483366	N.S.	N.S.	N.S.	PSBO1	PS II oxygen-evolving complex 1 [Source:NCBI gene (formerly Entrezgene);Acc:836789]
AT3G54050	-0.732416	-0.541216	-0.668052	-0.637404	N.S.	HCEF1	high cyclic electron flow 1 [Source:NCBI gene (formerly Entrezgene);Acc:824572]
AT2G34860	-0.729282	-0.392329	-0.58884	N.S.	N.S.	EDA3	DnaJ/Hsp40 cysteine-rich domain superfamily protein [Source:NCBI gene (formerly Entrezgene);Acc:818051]
AT4G33520	-0.725663	N.S.	-0.482306	N.S.	N.S.	PAA1	P-type ATP-ase 1 [Source:NCBI gene (formerly Entrezgene);Acc:829490]
AT1G42970	-0.72059	-0.503812	-0.659659	N.S.	N.S.	GAPB	glyceraldehyde-3-phosphate dehydrogenase B subunit [Source:NCBI gene (formerly Entrezgene);Acc:840895]
AT5G01530	-0.720532	-0.590031	-0.512127	-0.594427	N.S.	LHCB4.1	light harvesting complex photosystem II [Source:NCBI gene (formerly Entrezgene);Acc:830325]
AT4G10340	-0.716828	N.S.	N.S.	N.S.	N.S.	LHCB5	light harvesting complex of photosystem II 5 [Source:NCBI gene (formerly Entrezgene);Acc:826626]
AT3G55800	-0.709225	-0.406765	-0.697418	-0.644099	N.S.	SBPASE	sedoheptulose-bisphosphatase [Source:NCBI gene (formerly Entrezgene);Acc:824746]
AT1G61520	-0.702557	-0.476733	N.S.	N.S.	N.S.	LHCA3	PSI type III chlorophyll a/b-binding protein [Source:NCBI gene (formerly Entrezgene);Acc:842446]
AT2G05620	-0.699184	N.S.	N.S.	N.S.	N.S.	PGR5	proton gradient regulation 5 [Source:NCBI gene (formerly Entrezgene);Acc:815111]
AT5G08410	-0.688957	N.S.	N.S.	N.S.	N.S.	FTRA2	ferredoxin/thioredoxin reductase subunit A (variable subunit) 2 [Source:NCBI gene (formerly Entrezgene);Acc:830739]
AT3G60750	-0.67971	-0.419894	-0.694822	N.S.	N.S.	AT3G60750	Transketolase [Source:NCBI gene (formerly Entrezgene);Acc:825246]
AT1G75690	-0.674183	-0.493783	N.S.	N.S.	N.S.	LQY1	DnaJ/Hsp40 cysteine-rich domain superfamily protein [Source:NCBI gene (formerly Entrezgene);Acc:843903]
AT1G73060	-0.667791	-0.531479	-0.708731	N.S.	N.S.	LPA3	Low PSII Accumulation 3 [Source:NCBI gene (formerly Entrezgene);Acc:843637]
AT5G42270	-0.665036	N.S.	-0.616029	N.S.	N.S.	VAR1	FtsH extracellular protease family [Source:NCBI gene (formerly Entrezgene);Acc:834232]
AT3G08940	-0.660286	-0.449221	N.S.	N.S.	N.S.	LHCB4.2	light harvesting complex photosystem II [Source:NCBI gene (formerly Entrezgene);Acc:820043]
AT2G30950	-0.650047		-0.488797	N.S.	N.S.	VAR2	FtsH extracellular protease family [Source:NCBI gene (formerly Entrezgene);Acc:817646]
AT2G40100	-0.642705	N.S.	-0.863944	N.S.	N.S.	LHCB4.3	light harvesting complex photosystem II [Source:NCBI gene (formerly Entrezgene);Acc:818599]
AT1G79040	-0.632762	-0.620727	N.S.	N.S.	N.S.	PSBR	photosystem II subunit R [Source:NCBI gene (formerly Entrezgene);Acc:844245]
AT1G56190	-0.622873	-0.496279	-0.717404	-0.585132	N.S.	AT1G56190	Phosphoglycerate kinase family protein [Source:NCBI gene (formerly Entrezgene);Acc:842072]
AT1G03600	-0.621885	-0.362794	-0.489342	N.S.	N.S.	PSB27	photosystem II family protein [Source:NCBI gene (formerly Entrezgene);Acc:839449]
AT3G56650	-0.616684	-0.538625	N.S.	N.S.	N.S.	PPD6	thylakoid lumenal protein (Mog1/PsbP/DUF1795-like photosystem II reaction center PsbP family protein) [Source:NCBI gene (formerly Entrezgene);Acc:824832]
AT2G31040	-0.613662	-0.484458	-0.417741	N.S.	N.S.	AT2G31040	ATP synthase protein I-like protein [Source:NCBI gene (formerly Entrezgene);Acc:817656]
AT2G47940	-0.609867	-0.668159	-0.725279	N.S.	-0.568556	DEG2	DEGP protease 2 [Source:NCBI gene (formerly Entrezgene);Acc:819406]
AT2G45770	-0.598861	-0.611466	-0.846142	N.S.		CPFTSY	signal recognition particle receptor protein, chloroplast (FTSY) [Source:NCBI gene (formerly Entrezgene);Acc:819185]
ATCG01010	-0.596653	-0.548913	-0.47073	N.S.	N.S.	ndhF
AT3G61470	-0.596238	N.S.	N.S.	N.S.	N.S.	LHCA2	photosystem I light harvesting complex protein [Source:NCBI gene (formerly Entrezgene);Acc:825320]
AT3G55330	-0.589624	-0.453666	-0.589743	N.S.	N.S.	PPL1	PsbP-like protein 1 [Source:NCBI gene (formerly Entrezgene);Acc:824699]
AT1G11750	-0.571695	-0.511652	-0.655783	N.S.	N.S.	CLPP6	CLP protease proteolytic subunit 6 [Source:NCBI gene (formerly Entrezgene);Acc:837719]
AT4G05180	-0.566285	N.S.	N.S.	N.S.	N.S.	PSBQ-2	photosystem II subunit Q-2 [Source:NCBI gene (formerly Entrezgene);Acc:825866]
AT3G60370	-0.554169	N.S.	N.S.	N.S.	N.S.	AT3G60370	FKBP-like peptidyl-prolyl cis-trans isomerase family protein [Source:NCBI gene (formerly Entrezgene);Acc:825208]
AT4G01037	-0.552762	-0.600799	-0.553028	N.S.	N.S.	WTF1	Ubiquitin carboxyl-terminal hydrolase family protein [Source:NCBI gene (formerly Entrezgene);Acc:6240517]
AT1G76450	-0.542212	-0.556113	-0.554119	N.S.	N.S.	AT1G76450	Photosystem II reaction center PsbP family protein [Source:NCBI gene (formerly Entrezgene);Acc:843978]
AT4G03280	-0.528898	N.S.	-0.488553	N.S.	N.S.	PETC	photosynthetic electron transfer C [Source:NCBI gene (formerly Entrezgene);Acc:827996]
AT1G43670	-0.527894	-0.366839	N.S.	N.S.	N.S.	FBP	Inositol monophosphatase family protein [Source:NCBI gene (formerly Entrezgene);Acc:840953]
AT4G19100	-0.516919	N.S.	N.S.	N.S.	N.S.	PAM68	PAM68-like protein (DUF3464) [Source:NCBI gene (formerly Entrezgene);Acc:2745715]
AT4G02260	-0.512912	N.S.	N.S.	N.S.	N.S.	RSH1	RELA/SPOT homolog 1 [Source:NCBI gene (formerly Entrezgene);Acc:828096]
AT1G50250	-0.510999	N.S.	-0.436613	N.S.	N.S.	FTSH1	FTSH protease 1 [Source:NCBI gene (formerly Entrezgene);Acc:841447]
ATCG00440	-0.504446	-0.65386	-0.439077	N.S.	N.S.	ndhC
AT1G22700	-0.498726	N.S.	N.S.	N.S.	N.S.	AT1G22700	Tetratricopeptide repeat (TPR)-like superfamily protein [Source:NCBI gene (formerly Entrezgene);Acc:838876]
AT3G01500	-0.498253	-0.615394	-0.942452	N.S.	N.S.	CA1	carbonic anhydrase 1 [Source:NCBI gene (formerly Entrezgene);Acc:821134]
AT4G01050	-0.468241	-0.603684	-0.57848	N.S.	N.S.	TROL	thylakoid rhodanese-like protein [Source:NCBI gene (formerly Entrezgene);Acc:827921]
AT5G61410	-0.403629	N.S.	N.S.	N.S.	N.S.	RPE	D-ribulose-5-phosphate-3-epimerase [Source:NCBI gene (formerly Entrezgene);Acc:836262]
AT1G54500	-0.393695	-0.41311	N.S.	N.S.	N.S.	AT1G54500	Rubredoxin-like superfamily protein [Source:NCBI gene (formerly Entrezgene);Acc:841892]
AT5G21930	0.420724	0.548356	0.487139	0.489784	N.S.	PAA2	P-type ATPase of Arabidopsis 2 [Source:NCBI gene (formerly Entrezgene);Acc:832253]
ATCG00700	0.454119	N.S.	N.S.	N.S.	N.S.	psbN
AT2G45290	0.557985	N.S.	N.S.	N.S.	N.S.	AT2G45290	Transketolase [Source:NCBI gene (formerly Entrezgene);Acc:819137]
AT3G56090	0.674996	0.573785	N.S.	N.S.	N.S.	FER3	ferritin 3 [Source:NCBI gene (formerly Entrezgene);Acc:824775]
AT5G01600	1.38444	1.23486	1.48805	1.40265	1.59266	FER1	ferretin 1 [Source:NCBI gene (formerly Entrezgene);Acc:831720]
ATCG00690	N.S.	-0.944979	N.S.	N.S.	N.S.	psbT
ATCG00570	N.S.	-0.698518	N.S.	N.S.	N.S.	psbF
ATCG00220	N.S.	-0.609877	N.S.	N.S.	N.S.	psbM
ATCG00580	N.S.	-0.464902	N.S.	N.S.	N.S.	psbE
AT3G46610	N.S.	-0.454414	N.S.	N.S.	N.S.	AT3G46610	Pentatricopeptide repeat (PPR-like) superfamily protein [Source:NCBI gene (formerly Entrezgene);Acc:823814]
AT4G23890	N.S.	-0.433698	N.S.	N.S.	N.S.	NdhS	NAD(P)H-quinone oxidoreductase subunit S [Source:NCBI gene (formerly Entrezgene);Acc:828489]
ATCG00680	N.S.	-0.401817	N.S.	N.S.	N.S.	psbB
ATCG00730	N.S.	-0.365337	N.S.	N.S.	N.S.	petD
AT4G27600	N.S.	-0.545907	-0.613535	N.S.	N.S.	NARA5	pfkB-like carbohydrate kinase family protein [Source:NCBI gene (formerly Entrezgene);Acc:828871]
ATCG01110	N.S.	-0.351537	-0.534778	N.S.	N.S.	ndhH
AT2G18790	N.S.	-0.470175	-0.491627	N.S.	N.S.	PHYB	phytochrome B [Source:NCBI gene (formerly Entrezgene);Acc:816394]
AT1G71500	N.S.	-0.365914	-0.455158	N.S.	N.S.	AT1G71500	Rieske (2Fe-2S) domain-containing protein [Source:NCBI gene (formerly Entrezgene);Acc:843491]
AT1G64150	N.S.	N.S.	-0.783832	N.S.	N.S.	AT1G64150	Uncharacterized protein family (UPF0016) [Source:NCBI gene (formerly Entrezgene);Acc:842719]
AT1G76570	N.S.	N.S.	-0.740824	N.S.	N.S.	AT1G76570	Chlorophyll A-B binding family protein [Source:NCBI gene (formerly Entrezgene);Acc:843990]
AT3G05410	N.S.	N.S.	-0.649151	N.S.	N.S.	AT3G05410	Photosystem II reaction center PsbP family protein [Source:NCBI gene (formerly Entrezgene);Acc:819705]
AT1G12000	N.S.	N.S.	-0.528798	N.S.	N.S.	AT1G12000	Phosphofructokinase family protein [Source:NCBI gene (formerly Entrezgene);Acc:837752]
AT4G31390	N.S.	N.S.	-0.47153	N.S.	N.S.	ACDO1	Protein kinase superfamily protein [Source:NCBI gene (formerly Entrezgene);Acc:829266]
AT1G34000	N.S.	N.S.	-0.390711	N.S.	N.S.	OHP2	one-helix protein 2 [Source:NCBI gene (formerly Entrezgene);Acc:840297]
AT1G54130	N.S.	N.S.	0.485136	N.S.	N.S.	RSH3	RELA/SPOT homolog 3 [Source:NCBI gene (formerly Entrezgene);Acc:841853]
AT2G30790	N.S.	N.S.	1.23122	N.S.	N.S.	PSBP-2	photosystem II subunit P-2 [Source:NCBI gene (formerly Entrezgene);Acc:817630]
AT1G76550	N.S.	0.622408	N.S.	N.S.	N.S.	AT1G76550	Phosphofructokinase family protein [Source:NCBI gene (formerly Entrezgene);Acc:843988]
AT2G40300	N.S.	N.S.	N.S.	N.S.	0.590802	FER4	ferritin 4 [Source:NCBI gene (formerly Entrezgene);Acc:818622]
Regulation of Photosynthesis (GO:0010109)
	Log2FC
	Col-S	adc1-S	OxCuAO3-S	cdr7/cuao3-S	OxPtADC-S	Anotation
AT4G04850	-1.5614	-1.04674	-1.05581	-0.799856	-0.974717	KEA3	K+ efflux antiporter 3 [Source:NCBI gene (formerly Entrezgene);Acc:825822]
AT1G64860	-1.18671	-1.03607	-1.05072	-0.842826	-0.713049	SIGA	sigma factor A [Source:NCBI gene (formerly Entrezgene);Acc:842794]
AT1G01790	-0.846557	-0.693391	-1.00173	-0.787452	-0.994727	KEA1	K+ efflux antiporter 1 [Source:NCBI gene (formerly Entrezgene);Acc:837332]
AT3G11670	-1.09728	-0.587155	-0.775661	-0.798251	-0.595277	DGD1	UDP-Glycosyltransferase superfamily protein [Source:NCBI gene (formerly Entrezgene);Acc:820339]
AT5G08720	-0.691873	-0.596522	-0.837387	N.S.	-0.68197	AT5G08720	polyketide cyclase/dehydrase/lipid transporter [Source:NCBI gene (formerly Entrezgene);Acc:830772]
AT3G17170	-1.38412	-1.32069	-1.39769	-0.671263	N.S.	RFC3	Translation elongation factor EF1B/ribosomal protein S6 family protein [Source:NCBI gene (formerly Entrezgene);Acc:820974]
AT1G67740	-0.834424	-0.917054	-0.865785	-0.662482	N.S.	PSBY	photosystem II BY [Source:NCBI gene (formerly Entrezgene);Acc:843099]
AT4G04020	-1.21876	-0.768434	-0.788634	-1.0119	N.S.	FIB	fibrillin [Source:NCBI gene (formerly Entrezgene);Acc:825714]
AT3G01480	-0.800186	-0.717235	-0.702004	-0.550209	N.S.	CYP38	cyclophilin 38 [Source:NCBI gene (formerly Entrezgene);Acc:821137]
AT3G50820	-0.754887	-0.646288	-0.649093	-0.616814	N.S.	PSBO2	photosystem II subunit O-2 [Source:NCBI gene (formerly Entrezgene);Acc:824246]
AT4G33470	-0.611498	-0.57828	-0.483116	-0.486781	N.S.	HDA14	histone deacetylase 14 [Source:NCBI gene (formerly Entrezgene);Acc:829484]
AT1G77510	-0.708578	-0.600524	-0.432494	-0.573031	N.S.	PDIL1-2	PDI-like 1-2 [Source:NCBI gene (formerly Entrezgene);Acc:844087]
AT5G50950	-1.37457	-0.750146	N.S.	-1.85134	N.S.	FUM2	FUMARASE 2 [Source:NCBI gene (formerly Entrezgene);Acc:835168]
AT5G57050	-0.842674	-0.923759	-1.31134	N.S.	N.S.	ABI2	Protein phosphatase 2C family protein [Source:NCBI gene (formerly Entrezgene);Acc:835809]
AT5G52520	-0.688818	-0.55227	-0.754023	N.S.	N.S.	OVA6	Class II aaRS and biotin synthetases superfamily protein [Source:NCBI gene (formerly Entrezgene);Acc:835328]
AT1G68830	-1.06552	-0.667983	-0.744493	N.S.	N.S.	STN7	Serine/Threonine kinase domain protein [Source:NCBI gene (formerly Entrezgene);Acc:843215]
AT5G42270	-0.665036	-0.615419	-0.616029	N.S.	N.S.	VAR1	FtsH extracellular protease family [Source:NCBI gene (formerly Entrezgene);Acc:834232]
AT3G18680	-0.49089	-0.395445	-0.556492	N.S.	N.S.	AT3G18680	Amino acid kinase family protein [Source:NCBI gene (formerly Entrezgene);Acc:821399]
AT2G30950	-0.650047	-0.449221	-0.488797	N.S.	N.S.	VAR2	FtsH extracellular protease family [Source:NCBI gene (formerly Entrezgene);Acc:817646]
AT3G49720	-0.607479	-0.399497	-0.391411	N.S.	N.S.	AT3G49720	transmembrane protein [Source:NCBI gene (formerly Entrezgene);Acc:824134]
AT1G71500	N.S.	-0.365914	-0.455158	N.S.	N.S.	AT1G71500	Rieske (2Fe-2S) domain-containing protein [Source:NCBI gene (formerly Entrezgene);Acc:843491]
AT1G67840	-0.65173	N.S.	-0.483528	N.S.	N.S.	CSK	chloroplast sensor kinase [Source:NCBI gene (formerly Entrezgene);Acc:843110]
AT1G68890	N.S.	N.S.	-0.602415	N.S.	N.S.	PHYLLO	2-oxoglutarate decarboxylase/hydro-lyase/magnesium ion-binding protein [Source:NCBI gene (formerly Entrezgene);Acc:843222]
AT4G31390	N.S.	N.S.	-0.47153	N.S.	N.S.	ACDO1	Protein kinase superfamily protein [Source:NCBI gene (formerly Entrezgene);Acc:829266]
AT4G00630	N.S.	N.S.	-0.330969	N.S.	N.S.	KEA2	K+ efflux antiporter 2 [Source:NCBI gene (formerly Entrezgene);Acc:825834]
AT5G65810	-0.550827	-0.740861	N.S.	N.S.	N.S.	CGR3	transmembrane protein [Source:NCBI gene (formerly Entrezgene);Acc:836710]
AT5G66570	-0.733041	-0.483366	N.S.	N.S.	N.S.	PSBO1	PS II oxygen-evolving complex 1 [Source:NCBI gene (formerly Entrezgene);Acc:836789]
AT1G32070	N.S.	-0.431112	N.S.	N.S.	N.S.	NSI	nuclear shuttle interacting [Source:NCBI gene (formerly Entrezgene);Acc:840099]
AT2G30570	-1.00077	N.S.	N.S.	N.S.	N.S.	PSBW	photosystem II reaction center W [Source:NCBI gene (formerly Entrezgene);Acc:817606]
AT3G03380	0.718408	0.468529	0.446007	0.663849	N.S.	DEG7	DegP protease 7 [Source:NCBI gene (formerly Entrezgene);Acc:821268]
AT1G75540	1.54135	0.915285	0.870653	1.00665	1.05797	BBX21	salt tolerance homolog2 [Source:NCBI gene (formerly Entrezgene);Acc:843890]
AT1G09530	0.802161	0.974698	1.04026	0.925256	0.906126	PIF3	phytochrome interacting factor 3 [Source:NCBI gene (formerly Entrezgene);Acc:837479]
AT3G18520	0.52449	N.S.	N.S.	N.S.	N.S.	HDA15	histone deacetylase 15 [Source:NCBI gene (formerly Entrezgene);Acc:821382]
AT5G01920	0.465431	N.S.	N.S.	N.S.	N.S.	STN8	Protein kinase superfamily protein [Source:NCBI gene (formerly Entrezgene);Acc:831741]
AT4G26160	N.S.	N.S.	0.95327	N.S.	N.S.	ACHT1	atypical CYS HIS rich thioredoxin 1 [Source:NCBI gene (formerly Entrezgene);Acc:828722]
AT1G76560	N.S.	1.19387	1.92667	N.S.	N.S.	CP12-3	CP12 domain-containing protein 3 [Source:NCBI gene (formerly Entrezgene);Acc:843989]
