# Supplementary material
Source: Research Square preprint supplement (doi:10.21203/rs.3.rs-9349369/v1)
Supplement: Supplementary file 10 [file ada9d29e658a0a454668a774.xlsx]

## Sheet: Supplemental table S12
Supplemental table S12. Root and shoot expression responses to spaceflight conditions of cell wall-related DEGs.
Cell Wall Modification GO:0042545
	Log2FC
Gene ID	Col-R	adc1-R	OXCuAO3-R	cdr7/cuao3-R	OXPtADC-R	Col-S	adc1-S	OXCuAO3-S	cdr7/cuao3-S	OXPtADC-S	Description
AT4G39950	-0.285808	NS	NS	NS	NS	NS	NS	NS	NS	NS	cytochrome P450, family 79, subfamily B, polypeptide 2 [Source:NCBI gene (formerly Entrezgene);Acc:830154]
AT2G22330	NS	NS	NS	NS	NS	0.997508	1.03193	0.906015	NS	NS	cytochrome P450, family 79, subfamily B, polypeptide 3 [Source:NCBI gene (formerly Entrezgene);Acc:816765]
AT5G57220	1.49334	1.94334	1.20874	NS	NS	1.87299	2.73552	3.02254	2.1059	1.07176	cytochrome P450, family 81, subfamily F, polypeptide 2 [Source:NCBI gene (formerly Entrezgene);Acc:835828]
AT1G07000	NS	NS	NS	NS	NS	0.886264	0.945449	1.39646	1.08451	NS	exocyst subunit exo70 family protein B2 [Source:NCBI gene (formerly Entrezgene);Acc:837210]
AT1G20190	0.609249	NS	NS	NS	NS	NS	NS	NS	NS	NS	expansin 11 [Source:NCBI gene (formerly Entrezgene);Acc:838608]
AT1G69530	NS	NS	NS	0.595432	NS	NS	-0.509663	NS	NS	NS	expansin A1 [Source:NCBI gene (formerly Entrezgene);Acc:843288]
AT1G26770	-1.63954	-1.25992	-1.23953	-1.012	NS	-1.46428	-1.28141	-1.67521	-1.70525	-0.955076	expansin A10 [Source:NCBI gene (formerly Entrezgene);Acc:839218]
AT5G56320	0.558866	NS	NS	NS	NS	NS	NS	NS	NS	NS	expansin A14 [Source:NCBI gene (formerly Entrezgene);Acc:835731]
AT2G03090	-0.784829	-0.861171	-0.97948	NS	NS	-1.08977	-1.23119	-2.26577	-1.21329	-1.062	expansin A15 [Source:NCBI gene (formerly Entrezgene);Acc:814838]
AT3G55500	NS	NS	NS	NS	NS	2.19207	2.0892	2.0587	NS	NS	expansin A16 [Source:NCBI gene (formerly Entrezgene);Acc:824715]
AT4G01630	-1.71111	-1.17827	-1.58621	-1.0858	NS	NS	NS	NS	NS	NS	expansin A17 [Source:NCBI gene (formerly Entrezgene);Acc:827983]
AT2G39700	-0.805277	-0.649786	-0.691567	NS	NS	-0.576603	-0.847959	-0.727352	NS	NS	expansin A4 [Source:NCBI gene (formerly Entrezgene);Acc:818553]
AT3G29030	NS	NS	NS	NS	NS	-0.801997	-1.11827	-0.842236	-1.21844	NS	expansin A5 [Source:NCBI gene (formerly Entrezgene);Acc:822543]
AT2G28950	-0.829859	-0.75872	-0.792899	NS	NS	-1.06012	-0.765887	-0.604926	-0.5892	NS	expansin A6 [Source:NCBI gene (formerly Entrezgene);Acc:817444]
AT5G02260	0.407473	NS	NS	NS	NS	NS	0.812339	0.615664	NS	0.846932	expansin A9 [Source:NCBI gene (formerly Entrezgene);Acc:831736]
AT2G20750	0.540478	NS	NS	NS	NS	NS	NS	-1.35338	-0.98277	NS	expansin B1 [Source:NCBI gene (formerly Entrezgene);Acc:816604]
AT4G28250	-1.13136	-0.765079	-0.885152	NS	NS	-1.63079	-1.45961	-1.76604	-1.23323	-1.09306	expansin B3 [Source:NCBI gene (formerly Entrezgene);Acc:828940]
AT3G45970	NS	NS	NS	NS	NS	0.663918	NS	0.908565	1.63343	0.931175	expansin-like A1 [Source:NCBI gene (formerly Entrezgene);Acc:823740]
AT3G45960	-1.88732	NS	-0.925217	-1.828	NS	NS	NS	NS	NS	NS	expansin-like A3 [Source:NCBI gene (formerly Entrezgene);Acc:823739]
AT4G26850	-0.496001	NS	NS	NS	NS	-2.07173	-1.56486	-1.93931	-1.59281	-1.28037	GDP-L-galactose phosphorylase 1 [Source:NCBI gene (formerly Entrezgene);Acc:828792]
AT1G74670	-1.78508	NS	NS	NS	NS	1.23745	0.972735	1.58676	0.837097	1.62977	Gibberellin-regulated family protein [Source:NCBI gene (formerly Entrezgene);Acc:843806]
AT4G03550	NS	NS	NS	NS	NS	0.344883	0.400127	NS	NS	NS	glucan synthase-like 5 [Source:NCBI gene (formerly Entrezgene);Acc:825650]
AT1G70710	-0.997432	-0.572937	-0.677655	NS	NS	-0.546803	NS	-0.568867	NS	NS	glycosyl hydrolase 9B1 [Source:NCBI gene (formerly Entrezgene);Acc:843408]
AT4G39010	NS	NS	NS	NS	NS	-1.3731	-1.30749	NS	NS	NS	glycosyl hydrolase 9B18 [Source:NCBI gene (formerly Entrezgene);Acc:830056]
AT5G63800	NS	NS	NS	NS	NS	NS	NS	0.479099	NS	NS	Glycosyl hydrolase family 35 protein [Source:NCBI gene (formerly Entrezgene);Acc:836500]
AT2G44490	0.356663	NS	NS	NS	NS	NS	NS	0.724126	NS	NS	Glycosyl hydrolase superfamily protein [Source:NCBI gene (formerly Entrezgene);Acc:819056]
AT5G66460	-0.977171	-0.722464	-0.935982	NS	NS	NS	NS	NS	NS	NS	Glycosyl hydrolase superfamily protein [Source:NCBI gene (formerly Entrezgene);Acc:836778]
AT1G73360	NS	NS	NS	NS	NS	-0.98596	-1.25379	-1.88039	-0.958986	-1.20446	homeodomain GLABROUS 11 [Source:NCBI gene (formerly Entrezgene);Acc:843671]
AT5G46330	NS	1.97042	NS	NS	NS	1.62471	1.60558	1.68502	1.94181	1.74881	Leucine-rich receptor-like protein kinase family protein [Source:NCBI gene (formerly Entrezgene);Acc:834676]
AT1G11580	0.462249	NS	NS	0.682621	NS	NS	NS	NS	NS	NS	methylesterase PCR A [Source:NCBI gene (formerly Entrezgene);Acc:837701]
AT1G18570	0.94303	1.65565	1.45206	0.851952	0.814831	0.644674	1.53376	1.70998	1.16966	NS	myb domain protein 51 [Source:NCBI gene (formerly Entrezgene);Acc:838438]
AT5G50800	NS	NS	-1.06412	-1.1592	NS	-2.18159	NS	-3.12089	NS	NS	Nodulin MtN3 family protein [Source:NCBI gene (formerly Entrezgene);Acc:835152]
AT5G03280	NS	NS	NS	NS	NS	0.495792	0.50099	0.501368	0.485419	NS	NRAMP metal ion transporter family protein [Source:NCBI gene (formerly Entrezgene);Acc:831889]
AT3G07970	-0.841036	-0.72604	-0.596719	NS	NS	NS	NS	NS	NS	NS	Pectin lyase-like superfamily protein [Source:NCBI gene (formerly Entrezgene);Acc:819988]
AT3G54920	NS	NS	0.651332	NS	NS	1.31505	0.763932	0.592424	1.17286	NS	Pectin lyase-like superfamily protein [Source:NCBI gene (formerly Entrezgene);Acc:824657]
AT5G19730	-1.08224	NS	NS	NS	NS	-2.14928	-2.2566	-3.18566	-1.64557	-1.03823	Pectin lyase-like superfamily protein [Source:NCBI gene (formerly Entrezgene);Acc:832093]
AT5G47500	NS	NS	-0.654302	NS	NS	NS	NS	-0.96455	NS	NS	Pectin lyase-like superfamily protein [Source:NCBI gene (formerly Entrezgene);Acc:834800]
AT1G05310	NS	NS	NS	NS	NS	NS	1.36937	1.17141	NS	NS	Pectin lyase-like superfamily protein [Source:NCBI gene (formerly Entrezgene);Acc:837030]
AT1G48100	-2.22764	-1.78872	-1.79039	-1.79437	NS	-2.4146	-2.04104	-2.70236	-2.07069	-1.82804	Pectin lyase-like superfamily protein [Source:NCBI gene (formerly Entrezgene);Acc:841228]
AT1G53840	-0.498534	NS	NS	NS	NS	NS	NS	NS	NS	NS	pectin methylesterase 1 [Source:NCBI gene (formerly Entrezgene);Acc:841821]
AT3G14310	NS	NS	NS	NS	NS	NS	NS	NS	NS	0.583367	pectin methylesterase 3 [Source:NCBI gene (formerly Entrezgene);Acc:820651]
AT4G33220	NS	NS	NS	NS	NS	-0.762319	-0.601602	-0.409947	NS	NS	pectin methylesterase 44 [Source:NCBI gene (formerly Entrezgene);Acc:829458]
AT3G56960	NS	NS	0.603048	NS	NS	NS	NS	NS	NS	NS	phosphatidyl inositol monophosphate 5 kinase 4 [Source:NCBI gene (formerly Entrezgene);Acc:824863]
AT5G44070	NS	NS	NS	NS	NS	NS	NS	0.531041	NS	NS	phytochelatin synthase 1 (PCS1) [Source:NCBI gene (formerly Entrezgene);Acc:834430]
AT2G26440	NS	NS	NS	NS	NS	0.537659	NS	0.870844	NS	NS	Plant invertase/pectin methylesterase inhibitor superfamily [Source:NCBI gene (formerly Entrezgene);Acc:817184]
AT2G43050	NS	NS	NS	NS	NS	1.81775	1.27786	1.32549	1.8335	1.35054	Plant invertase/pectin methylesterase inhibitor superfamily [Source:NCBI gene (formerly Entrezgene);Acc:818907]
AT2G45220	0.853432	0.729194	NS	NS	NS	1.05583	1.81127	2.17618	NS	NS	Plant invertase/pectin methylesterase inhibitor superfamily [Source:NCBI gene (formerly Entrezgene);Acc:819130]
AT2G47550	-0.834009	NS	-0.748707	NS	NS	NS	NS	NS	NS	NS	Plant invertase/pectin methylesterase inhibitor superfamily [Source:NCBI gene (formerly Entrezgene);Acc:819368]
AT3G10720	NS	NS	NS	NS	NS	NS	NS	0.528371	0.860477	NS	Plant invertase/pectin methylesterase inhibitor superfamily [Source:NCBI gene (formerly Entrezgene);Acc:820241]
AT3G27980	NS	NS	0.84061	NS	NS	1.42162	NS	NS	NS	NS	Plant invertase/pectin methylesterase inhibitor superfamily [Source:NCBI gene (formerly Entrezgene);Acc:822422]
AT3G49220	NS	NS	NS	NS	NS	NS	-0.663891	-0.510059	NS	NS	Plant invertase/pectin methylesterase inhibitor superfamily [Source:NCBI gene (formerly Entrezgene);Acc:824083]
AT4G02330	-1.80676	-1.07224	-0.934053	NS	NS	-0.653793	NS	NS	NS	NS	Plant invertase/pectin methylesterase inhibitor superfamily [Source:NCBI gene (formerly Entrezgene);Acc:828064]
AT5G09760	-0.755138	-0.686709	-0.626175	NS	NS	-0.490829	NS	-0.49893	NS	NS	Plant invertase/pectin methylesterase inhibitor superfamily [Source:NCBI gene (formerly Entrezgene);Acc:830836]
AT5G20860	-0.749307	NS	NS	NS	NS	NS	NS	NS	NS	NS	Plant invertase/pectin methylesterase inhibitor superfamily [Source:NCBI gene (formerly Entrezgene);Acc:832209]
AT1G23200	-2.32001	NS	-1.40409	NS	-1.31623	NS	NS	NS	NS	NS	Plant invertase/pectin methylesterase inhibitor superfamily [Source:NCBI gene (formerly Entrezgene);Acc:838928]
AT5G62360	-1.44768	NS	NS	NS	NS	NS	NS	0.597184	NS	NS	Plant invertase/pectin methylesterase inhibitor superfamily protein [Source:NCBI gene (formerly Entrezgene);Acc:836357]
AT5G61130	NS	NS	NS	NS	NS	-0.546294	NS	-0.748162	NS	NS	plasmodesmata callose-binding protein 1 [Source:NCBI gene (formerly Entrezgene);Acc:836234]
AT1G70370	-0.75927	NS	-0.600825	NS	NS	-1.04385	-0.9169	-0.938152	-0.570812	NS	polygalacturonase 2 [Source:NCBI gene (formerly Entrezgene);Acc:843373]
AT2G18230	-0.377565	NS	NS	NS	NS	-0.763432	NS	-0.832029	-0.796605	-0.841594	pyrophosphorylase 2 [Source:NCBI gene (formerly Entrezgene);Acc:816338]
AT4G34980	NS	NS	NS	NS	NS	NS	NS	-0.405686	NS	NS	subtilisin-like serine protease 2 [Source:NCBI gene (formerly Entrezgene);Acc:829650]
AT1G34350	NS	NS	NS	NS	NS	-0.610083	NS	NS	NS	NS	Tmem18 [Source:NCBI gene (formerly Entrezgene);Acc:840336]
AT5G66240	NS	NS	NS	NS	NS	NS	0.420478	0.401399	NS	NS	Transducin/WD40 repeat-like superfamily protein [Source:NCBI gene (formerly Entrezgene);Acc:836756]
AT2G34070	NS	NS	NS	NS	NS	0.615113	0.767418	0.524252	0.858144	0.627707	TRICHOME BIREFRINGENCE-LIKE 37 [Source:NCBI gene (formerly Entrezgene);Acc:817968]
AT5G06700	NS	NS	NS	NS	NS	0.544074	0.561511	0.576041	0.851521	0.84505	trichome birefringence-like protein (DUF828) [Source:NCBI gene (formerly Entrezgene);Acc:830559]
AT3G03250	NS	NS	NS	NS	NS	-0.700868	-0.482309	-0.464062	-0.578565	NS	UDP-GLUCOSE PYROPHOSPHORYLASE 1 [Source:NCBI gene (formerly Entrezgene);Acc:821313]
AT5G17310	NS	NS	NS	NS	NS	-0.771387	-0.63599	-0.75855	NS	NS	UDP-glucose pyrophosphorylase 2 [Source:NCBI gene (formerly Entrezgene);Acc:831596]
AT1G24100	NS	NS	NS	NS	NS	-1.01469	-1.01567	-0.668888	-0.903835	NS	UDP-glucosyl transferase 74B1 [Source:NCBI gene (formerly Entrezgene);Acc:839022]
AT2G36100	NS	NS	NS	NS	NS	1.21666	NS	NS	NS	NS	Uncharacterized protein family (UPF0497) [Source:NCBI gene (formerly Entrezgene);Acc:818183]
AT3G11550	NS	NS	NS	NS	NS	1.88846	NS	NS	NS	NS	Uncharacterized protein family (UPF0497) [Source:NCBI gene (formerly Entrezgene);Acc:820328]
AT5G15290	2.19374	NS	NS	NS	NS	NS	NS	NS	NS	NS	Uncharacterized protein family (UPF0497) [Source:NCBI gene (formerly Entrezgene);Acc:831381]
AT2G18800	NS	NS	-0.644219	NS	NS	NS	NS	NS	NS	NS	xyloglucan endotransglucosylase/hydrolase 21 [Source:NCBI gene (formerly Entrezgene);Acc:816395]
AT4G30270	0.610245	0.946428	0.818893	NS	NS	2.57862	2.27894	2.27376	3.24316	2.50182	xyloglucan endotransglucosylase/hydrolase 24 [Source:NCBI gene (formerly Entrezgene);Acc:829150]
AT1G10550	NS	NS	NS	NS	NS	2.14703	NS	NS	NS	1.52794	xyloglucan:xyloglucosyl transferase 33 [Source:NCBI gene (formerly Entrezgene);Acc:837596]
Cell Wall Biogenesis GO:0042546
	Log2FC
Gene ID	Col-R	adc1-R	OXCuAO3-R	cdr7/cuao3-R	OXPtADC-R	Col-S	adc1-S	OXCuAO3-S	cdr7/cuao3-S	OXPtADC-S	Description
AT2G32530	-2.50893	NS	-1.99269	NS	-2.90676	-1.68632	-0.968148	-2.09579	-1.3448	NS	cellulose synthase-like B3 [Source:NCBI gene (formerly Entrezgene);Acc:817814]
AT5G57560	-2.4445	NS	-0.729278	NS	NS	NS	0.761636	0.931645	NS	NS	Xyloglucan endotransglucosylase/hydrolase family protein [Source:NCBI gene (formerly Entrezgene);Acc:835860]
AT4G37800	-1.60396	-1.13165	-1.16576	-1.26616	NS	-0.486614	NS	NS	NS	NS	xyloglucan endotransglucosylase/hydrolase 7 [Source:NCBI gene (formerly Entrezgene);Acc:829936]
AT2G36870	-1.42126	-1.09994	-0.978132	NS	NS	-1.27029	-1.42963	-1.05915	-0.765558	-0.688348	xyloglucan endotransglucosylase/hydrolase 32 [Source:NCBI gene (formerly Entrezgene);Acc:818259]
AT4G25810	-1.1784	NS	NS	NS	NS	1.64896	2.55945	2.30108	NS	1.22268	xyloglucan endotransglycosylase 6 [Source:NCBI gene (formerly Entrezgene);Acc:828686]
AT2G36570	-1.15827	-1.00129	-1.16048	-0.628553	NS	-0.600372	-0.791226	-0.959016	-0.630894	NS	Leucine-rich repeat protein kinase family protein [Source:NCBI gene (formerly Entrezgene);Acc:818230]
AT4G03210	-0.82778	-0.650027	NS	-0.970325	NS	NS	NS	NS	NS	-0.632728	xyloglucan endotransglucosylase/hydrolase 9 [Source:NCBI gene (formerly Entrezgene);Acc:828024]
AT3G44990	-0.762531	-0.810789	-0.892328	-0.792472	NS	-1.7693	-2.00195	-2.12225	-1.58199	-1.15791	xyloglucan endo-transglycosylase-related 8 [Source:NCBI gene (formerly Entrezgene);Acc:823634]
AT5G13870	-0.745295	NS	-1.10679	NS	-1.02272	1.08448	NS	NS	NS	NS	xyloglucan endotransglucosylase/hydrolase 5 [Source:NCBI gene (formerly Entrezgene);Acc:831233]
AT5G67210	-0.728911	NS	NS	NS	NS	NS	-1.36928	NS	NS	NS	IRREGULAR XYLEM protein (DUF579) [Source:NCBI gene (formerly Entrezgene);Acc:836856]
AT3G16860	-0.726076	NS	NS	NS	NS	NS	NS	NS	NS	NS	COBRA-like protein 8 [Source:NCBI gene (formerly Entrezgene);Acc:820941]
AT4G30280	-0.660734	NS	NS	NS	NS	0.708203	1.83548	1.86262	NS	NS	xyloglucan endotransglucosylase/hydrolase 18 [Source:NCBI gene (formerly Entrezgene);Acc:829151]
AT2G06850	-0.540361	NS	NS	NS	NS	0.430591	NS	NS	0.820602	0.959513	xyloglucan endotransglucosylase/hydrolase 4 [Source:NCBI gene (formerly Entrezgene);Acc:815247]
AT1G02730	-0.464836	NS	-0.509962	NS	NS	-1.19563	-1.2372	-1.6286	-0.75285	-1.03822	cellulose synthase-like D5 [Source:NCBI gene (formerly Entrezgene);Acc:839467]
AT5G45750	-0.450932	NS	NS	NS	NS	-0.596498	NS	NS	NS	NS	RAB GTPase homolog A1C [Source:NCBI gene (formerly Entrezgene);Acc:834614]
AT1G78580	-0.439751	-0.620158	-0.609243	NS	NS	-0.949069	-0.732355	-1.37741	-0.756245	-0.859181	trehalose-6-phosphate synthase [Source:NCBI gene (formerly Entrezgene);Acc:844194]
AT5G09870	-0.393837	NS	-0.438079	NS	NS	-1.02671	-0.751546	-1.05043	-0.640676	-0.591718	cellulose synthase 5 [Source:NCBI gene (formerly Entrezgene);Acc:830847]
AT3G49720	-0.357404	NS	NS	NS	NS	-0.607479	-0.399497	-0.391411	NS	NS	transmembrane protein [Source:NCBI gene (formerly Entrezgene);Acc:824134]
AT1G75500	-0.354799	NS	NS	NS	NS	NS	-0.37231	NS	NS	NS	Walls Are Thin 1 [Source:NCBI gene (formerly Entrezgene);Acc:843886]
AT5G12150	-0.266647	NS	NS	NS	NS	-0.681502	-0.592107	-0.657194	-0.503496	NS	Rho GTPase activation protein (RhoGAP) with PH domain-containing protein [Source:NCBI gene (formerly Entrezgene);Acc:831088]
AT1G32170	0.387416	NS	0.576389	NS	NS	1.34814	1.7112	1.9239	2.08413	1.57331	xyloglucan endotransglucosylase/hydrolase 30 [Source:NCBI gene (formerly Entrezgene);Acc:840109]
AT4G14130	0.442849	NS	NS	NS	NS	2.10537	1.1913	1.21522	1.14273	NS	xyloglucan endotransglucosylase/hydrolase 15 [Source:NCBI gene (formerly Entrezgene);Acc:827051]
AT1G55850	0.444551	0.572665	NS	NS	NS	1.25852	1.26478	1.15442	1.25988	1.29523	cellulose synthase like E1 [Source:NCBI gene (formerly Entrezgene);Acc:842035]
AT1G03870	0.450949	NS	NS	NS	NS	0.588701	0.463511	0.419756	0.828059	0.859884	FASCICLIN-like arabinoogalactan 9 [Source:NCBI gene (formerly Entrezgene);Acc:839384]
AT2G15390	0.476062	NS	NS	NS	NS	1.51543	1.13501	2.69526	1.75785	1.74959	fucosyltransferase 4 [Source:NCBI gene (formerly Entrezgene);Acc:816031]
AT2G28110	0.594953	NS	0.690923	NS	NS	2.46085	1.84796	1.9524	1.6706	NS	Exostosin family protein [Source:NCBI gene (formerly Entrezgene);Acc:817357]
AT4G30270	0.610245	0.946428	0.818893	NS	NS	2.57862	2.27894	2.27376	3.24316	2.50182	xyloglucan endotransglucosylase/hydrolase 24 [Source:NCBI gene (formerly Entrezgene);Acc:829150]
AT1G56550	0.733452	NS	NS	NS	NS	NS	NS	NS	NS	NS	RhamnoGalacturonan specific Xylosyltransferase 1 [Source:NCBI gene (formerly Entrezgene);Acc:842108]
AT5G49360	0.828871	0.961799	1.0033	0.576032	0.891209	2.64347	2.44861	2.71136	3.29717	2.75157	beta-xylosidase 1 [Source:NCBI gene (formerly Entrezgene);Acc:834996]
AT4G15290	0.881891	NS	NS	NS	NS	NS	NS	NS	NS	NS	Cellulose synthase family protein [Source:NCBI gene (formerly Entrezgene);Acc:827195]
AT3G29810	0.910203	1.42477	1.18466	1.28498	NS	1.17779	0.910617	0.900139	1.6622	NS	COBRA-like protein 2 [Source:NCBI gene (formerly Entrezgene);Acc:822697]
AT3G23730	1.4941	0.88466	1.12906	NS	1.35169	NS	-0.58209	NS	NS	NS	xyloglucan endotransglucosylase/hydrolase 16 [Source:NCBI gene (formerly Entrezgene);Acc:821955]
AT2G18800	NS	NS	-0.644219	NS	NS	NS	NS	NS	NS	NS	xyloglucan endotransglucosylase/hydrolase 21 [Source:NCBI gene (formerly Entrezgene);Acc:816395]
AT5G48070	NS	NS	-0.57053	NS	NS	NS	NS	NS	NS	NS	xyloglucan endotransglucosylase/hydrolase 20 [Source:NCBI gene (formerly Entrezgene);Acc:834859]
AT5G65270	NS	NS	-0.456026	NS	NS	-0.459065	NS	NS	NS	NS	RAB GTPase homolog A4A [Source:NCBI gene (formerly Entrezgene);Acc:836652]
AT5G57530	NS	NS	1.34084	NS	NS	NS	NS	NS	NS	NS	xyloglucan endotransglucosylase/hydrolase 12 [Source:NCBI gene (formerly Entrezgene);Acc:835857]
AT2G20520	NS	NS	1.67355	NS	NS	NS	NS	NS	NS	NS	FASCICLIN-like arabinogalactan 6 [Source:NCBI gene (formerly Entrezgene);Acc:816574]
AT5G41040	NS	NS	NS	-0.614096	NS	NS	NS	NS	NS	NS	HXXXD-type acyl-transferase family protein [Source:NCBI gene (formerly Entrezgene);Acc:834106]
AT4G37450	NS	NS	NS	NS	0.85284	NS	NS	-0.914562	NS	0.732982	arabinogalactan protein 18 [Source:NCBI gene (formerly Entrezgene);Acc:829900]
AT2G23130	NS	NS	NS	NS	NS	-0.909712	-1.31632	-1.4522	NS	NS	arabinogalactan protein 17 [Source:NCBI gene (formerly Entrezgene);Acc:816845]
AT1G28290	NS	NS	NS	NS	NS	NS	NS	-0.744974	NS	NS	arabinogalactan protein 31 [Source:NCBI gene (formerly Entrezgene);Acc:839723]
AT2G22125	NS	NS	NS	NS	NS	0.417486	NS	NS	NS	NS	binding protein [Source:NCBI gene (formerly Entrezgene);Acc:816747]
AT4G18780	NS	NS	NS	NS	NS	NS	0.684541	NS	NS	NS	cellulose synthase family protein [Source:NCBI gene (formerly Entrezgene);Acc:827612]
AT4G24010	NS	NS	NS	NS	NS	-2.10923	NS	-1.2001	-2.12548	NS	cellulose synthase like G1 [Source:NCBI gene (formerly Entrezgene);Acc:828501]
AT4G24000	NS	NS	NS	NS	NS	4.6906	NS	4.46733	NS	NS	cellulose synthase like G2 [Source:NCBI gene (formerly Entrezgene);Acc:828500]
AT4G23990	NS	NS	NS	NS	NS	-2.03123	-2.32317	-2.65034	-2.3299	-1.52883	cellulose synthase like G3 [Source:NCBI gene (formerly Entrezgene);Acc:828499]
AT5G16910	NS	NS	NS	NS	NS	0.753974	0.751129	0.634434	0.809562	NS	cellulose-synthase like D2 [Source:NCBI gene (formerly Entrezgene);Acc:831554]
AT3G02210	NS	NS	NS	NS	NS	NS	NS	-0.693456	NS	NS	COBRA-like protein 1 [Source:NCBI gene (formerly Entrezgene);Acc:821245]
AT2G01850	NS	NS	NS	NS	NS	0.690955	0.556152	0.757441	1.02996	0.853979	endoxyloglucan transferase A3 [Source:NCBI gene (formerly Entrezgene);Acc:814716]
AT2G35700	NS	NS	NS	NS	NS	NS	-1.68976	NS	NS	NS	ERF family protein 38 [Source:NCBI gene (formerly Entrezgene);Acc:818139]
AT5G03540	NS	NS	NS	NS	NS	0.633462	0.511552	0.524305	0.610915	NS	exocyst subunit exo70 family protein A1 [Source:NCBI gene (formerly Entrezgene);Acc:831809]
AT2G04780	NS	NS	NS	NS	NS	-0.61126	NS	-0.743702	NS	NS	FASCICLIN-like arabinoogalactan 7 [Source:NCBI gene (formerly Entrezgene);Acc:815021]
AT3G61130	NS	NS	NS	NS	NS	-0.470838	-0.500931	-0.56266	NS	NS	galacturonosyltransferase 1 [Source:NCBI gene (formerly Entrezgene);Acc:825285]
AT5G15470	NS	NS	NS	NS	NS	-0.594916	-0.465546	NS	NS	NS	galacturonosyltransferase 14 [Source:NCBI gene (formerly Entrezgene);Acc:831400]
AT1G02720	NS	NS	NS	NS	NS	NS	NS	-0.7843	NS	NS	galacturonosyltransferase 5 [Source:NCBI gene (formerly Entrezgene);Acc:839475]
AT2G35620	NS	NS	NS	NS	NS	-0.464027	-0.452742	-0.516289	NS	NS	Leucine-rich repeat protein kinase family protein [Source:NCBI gene (formerly Entrezgene);Acc:818130]
AT4G20140	NS	NS	NS	NS	NS	1.06013	NS	1.1695	NS	NS	Leucine-rich repeat transmembrane protein kinase [Source:NCBI gene (formerly Entrezgene);Acc:827760]
AT4G17220	NS	NS	NS	NS	NS	NS	NS	NS	NS	-1.04987	microtubule-associated proteins 70-5 [Source:NCBI gene (formerly Entrezgene);Acc:827434]
AT1G27600	NS	NS	NS	NS	NS	0.679885	NS	NS	0.742346	NS	Nucleotide-diphospho-sugar transferases superfamily protein [Source:NCBI gene (formerly Entrezgene);Acc:839652]
AT2G34410	NS	NS	NS	NS	NS	NS	-0.574209	-0.652178	NS	NS	O-acetyltransferase family protein [Source:NCBI gene (formerly Entrezgene);Acc:818004]
AT3G06550	NS	NS	NS	NS	NS	-0.549285	-0.502337	-0.612762	NS	NS	O-acetyltransferase family protein [Source:NCBI gene (formerly Entrezgene);Acc:819834]
AT3G21190	NS	NS	NS	NS	NS	NS	NS	-0.453813	NS	NS	O-fucosyltransferase family protein [Source:NCBI gene (formerly Entrezgene);Acc:821672]
AT1G22620	NS	NS	NS	NS	NS	NS	NS	0.402153	NS	NS	Phosphoinositide phosphatase family protein [Source:NCBI gene (formerly Entrezgene);Acc:838868]
AT3G16630	NS	NS	NS	NS	NS	NS	NS	-0.383357	NS	NS	P-loop containing nucleoside triphosphate hydrolases superfamily protein [Source:NCBI gene (formerly Entrezgene);Acc:820915]
AT5G47820	NS	NS	NS	NS	NS	0.3646	NS	NS	NS	NS	P-loop containing nucleoside triphosphate hydrolases superfamily protein [Source:NCBI gene (formerly Entrezgene);Acc:834833]
AT2G15440	NS	NS	NS	NS	NS	NS	-1.61013	NS	NS	NS	polysaccharide biosynthesis protein (DUF579) [Source:NCBI gene (formerly Entrezgene);Acc:816036]
AT5G59150	NS	NS	NS	NS	NS	0.533632	0.644778	0.846509	0.667002	NS	RAB GTPase homolog A2D [Source:NCBI gene (formerly Entrezgene);Acc:836033]
AT1G06400	NS	NS	NS	NS	NS	0.556627	NS	0.507055	0.688806	NS	Ras-related small GTP-binding family protein [Source:NCBI gene (formerly Entrezgene);Acc:837151]
AT3G02230	NS	NS	NS	NS	NS	-0.770974	-0.777563	-1.07516	-0.68351	-0.521835	reversibly glycosylated polypeptide 1 [Source:NCBI gene (formerly Entrezgene);Acc:821233]
AT4G01750	NS	NS	NS	NS	NS	1.10611	NS	1.38457	1.24712	1.09724	rhamnogalacturonan xylosyltransferase 2 [Source:NCBI gene (formerly Entrezgene);Acc:827905]
AT5G19390	NS	NS	NS	NS	NS	NS	NS	-0.435682	NS	NS	Rho GTPase activation protein (RhoGAP) with PH domain-containing protein [Source:NCBI gene (formerly Entrezgene);Acc:832059]
AT3G59770	NS	NS	NS	NS	NS	0.401876	0.341725	0.345152	NS	NS	sacI homology domain-containing protein / WW domain-containing protein [Source:NCBI gene (formerly Entrezgene);Acc:825146]
AT1G78240	NS	NS	NS	NS	NS	0.727569	0.821307	0.829748	0.912044	0.557464	S-adenosyl-L-methionine-dependent methyltransferases superfamily protein [Source:NCBI gene (formerly Entrezgene);Acc:844160]
AT2G33120	NS	NS	NS	NS	NS	NS	0.414456	0.408905	NS	NS	synaptobrevin-related protein 1 [Source:NCBI gene (formerly Entrezgene);Acc:817874]
AT1G30230	NS	NS	NS	NS	NS	NS	0.558665	0.457925	NS	NS	translation elongation factor EF1B/ribosomal protein S6 family protein
AT4G18270	NS	NS	NS	NS	NS	-1.31623	-1.26493	NS	NS	NS	translocase 11 [Source:NCBI gene (formerly Entrezgene);Acc:827553]
AT5G65810	NS	NS	NS	NS	NS	-0.550827	-0.740861	NS	NS	NS	transmembrane protein [Source:NCBI gene (formerly Entrezgene);Acc:836710]
AT2G41770	NS	NS	NS	NS	NS	NS	-0.461285	NS	NS	NS	transmembrane protein, putative (DUF288) [Source:NCBI gene (formerly Entrezgene);Acc:818776]
AT3G57420	NS	NS	NS	NS	NS	0.832079	0.769162	0.671787	0.81672	0.612186	transmembrane protein, putative (DUF288) [Source:NCBI gene (formerly Entrezgene);Acc:824909]
AT3G11030	NS	NS	NS	NS	NS	0.817516	NS	0.72929	0.82785	NS	TRICHOME BIREFRINGENCE-LIKE 32 [Source:NCBI gene (formerly Entrezgene);Acc:820274]
AT5G06700	NS	NS	NS	NS	NS	0.544074	0.561511	0.576041	0.851521	0.84505	trichome birefringence-like protein (DUF828) [Source:NCBI gene (formerly Entrezgene);Acc:830559]
AT2G40190	NS	NS	NS	NS	NS	NS	NS	0.885136	NS	NS	UDP-Glycosyltransferase superfamily protein [Source:NCBI gene (formerly Entrezgene);Acc:818610]
AT4G25820	NS	NS	NS	NS	NS	NS	NS	2.89776	NS	NS	xyloglucan endotransglucosylase/hydrolase 14 [Source:NCBI gene (formerly Entrezgene);Acc:828687]
AT1G65310	NS	NS	NS	NS	NS	0.561715	NS	0.626275	0.848048	1.09361	xyloglucan endotransglucosylase/hydrolase 17 [Source:NCBI gene (formerly Entrezgene);Acc:842839]
AT4G30290	NS	NS	NS	NS	NS	NS	0.952527	0.953588	NS	1.51694	xyloglucan endotransglucosylase/hydrolase 19 [Source:NCBI gene (formerly Entrezgene);Acc:829152]
AT5G57550	NS	NS	NS	NS	NS	NS	NS	1.80927	1.62807	NS	xyloglucan endotransglucosylase/hydrolase 25 [Source:NCBI gene (formerly Entrezgene);Acc:835859]
AT5G65730	NS	NS	NS	NS	NS	-0.926297	-0.68829	-0.507435	NS	NS	xyloglucan endotransglucosylase/hydrolase 6 [Source:NCBI gene (formerly Entrezgene);Acc:836702]
AT1G11545	NS	NS	NS	NS	NS	0.501151	NS	NS	NS	1.09767	xyloglucan endotransglucosylase/hydrolase 8 [Source:NCBI gene (formerly Entrezgene);Acc:837698]
AT1G10550	NS	NS	NS	NS	NS	2.14703	NS	NS	NS	1.52794	xyloglucan:xyloglucosyl transferase 33 [Source:NCBI gene (formerly Entrezgene);Acc:837596]
Plant-type cell wall loosening (GO:0009828)
	Log2FC
Gene ID	Col-R	adc1-R	OXCuAO3-R	cdr7/cuao3-R	OXPtADC-R	Col-S	adc1-S	OXCuAO3-S	cdr7/cuao3-S	OXPtADC-S	Description
AT4G30270	0.610245	0.946428	0.818893	NS	NS	2.57862	2.27894	2.27376	3.24316	2.50182	xyloglucan endotransglucosylase/hydrolase 24 [Source:NCBI gene (formerly Entrezgene);Acc:829150]
AT1G20190	0.609249	NS	NS	NS	NS	NS	NS	NS	NS	NS	expansin 11 [Source:NCBI gene (formerly Entrezgene);Acc:838608]
AT2G20750	0.540478	NS	NS	NS	NS	NS	NS	-1.35338	-0.98277	NS	expansin B1 [Source:NCBI gene (formerly Entrezgene);Acc:816604]
AT5G02260	0.407473	NS	NS	NS	NS	NS	0.812339	0.615664	NS	0.846932	expansin A9 [Source:NCBI gene (formerly Entrezgene);Acc:831736]
AT5G56320	0.558866	NS	NS	NS	NS	NS	NS	NS	NS	NS	expansin A14 [Source:NCBI gene (formerly Entrezgene);Acc:835731]
AT1G26770	-1.63954	-1.25992	-1.23953	-1.012	NS	-1.46428	-1.28141	-1.67521	-1.70525	-0.955076	expansin A10 [Source:NCBI gene (formerly Entrezgene);Acc:839218]
AT2G03090	-0.784829	-0.861171	-0.97948	NS	NS	-1.08977	-1.23119	-2.26577	-1.21329	-1.062	expansin A15 [Source:NCBI gene (formerly Entrezgene);Acc:814838]
AT2G28950	-0.829859	-0.75872	-0.792899	NS	NS	-1.06012	-0.765887	-0.604926	-0.5892	NS	expansin A6 [Source:NCBI gene (formerly Entrezgene);Acc:817444]
AT2G39700	-0.805277	-0.649786	-0.691567	NS	NS	-0.576603	-0.847959	-0.727352	NS	NS	expansin A4 [Source:NCBI gene (formerly Entrezgene);Acc:818553]
AT4G28250	-1.13136	-0.765079	-0.885152	NS	NS	-1.63079	-1.45961	-1.76604	-1.23323	-1.09306	expansin B3 [Source:NCBI gene (formerly Entrezgene);Acc:828940]
AT3G45960	-1.88732	NS	-0.925217	-1.828	NS	NS	NS	NS	NS	NS	expansin-like A3 [Source:NCBI gene (formerly Entrezgene);Acc:823739]
AT4G01630	-1.71111	-1.17827	-1.58621	-1.0858	NS	NS	NS	NS	NS	NS	expansin A17 [Source:NCBI gene (formerly Entrezgene);Acc:827983]
AT5G66460	-0.977171	-0.722464	-0.935982	NS	NS	NS	NS	NS	NS	NS	Glycosyl hydrolase superfamily protein [Source:NCBI gene (formerly Entrezgene);Acc:836778]
AT3G45970	NS	NS	NS	NS	NS	0.663918	NS	0.908565	1.63343	0.931175	expansin-like A1 [Source:NCBI gene (formerly Entrezgene);Acc:823740]
AT3G55500	NS	NS	NS	NS	NS	2.19207	2.0892	2.0587	NS	NS	expansin A16 [Source:NCBI gene (formerly Entrezgene);Acc:824715]
AT1G73360	NS	NS	NS	NS	NS	-0.98596	-1.25379	-1.88039	-0.958986	-1.20446	homeodomain GLABROUS 11 [Source:NCBI gene (formerly Entrezgene);Acc:843671]
AT3G29030	NS	NS	NS	NS	NS	-0.801997	-1.11827	-0.842236	-1.21844	NS	expansin A5 [Source:NCBI gene (formerly Entrezgene);Acc:822543]
AT4G39010	NS	NS	NS	NS	NS	-1.3731	-1.30749	NS	NS	NS	glycosyl hydrolase 9B18 [Source:NCBI gene (formerly Entrezgene);Acc:830056]
AT1G69530	NS	NS	NS	0.595432	NS	NS	-0.509663	NS	NS	NS	expansin A1 [Source:NCBI gene (formerly Entrezgene);Acc:843288]
