# Supplementary material
Source: Research Square preprint supplement (doi:10.21203/rs.3.rs-9349369/v1)
Supplement: Supplementary file 11 [file b869e8f033a4511c76e670b7.xlsx]

## Sheet: Supplemental table S7
Supplemental Table S7. Lists of Col DEGs associated with GO group GO:0006979 (Response to Oxidative Stress). These DEGs were clustered as described in Figure 6A. Organ-specific expression responses to spaceflight conditions are shown for the 5 genotypes included in APEX08. The results of GO- and transcription-factor target enrichment analyses are also shown in this spreadsheet. NS represents no s…
Group	Name	Name	Root	Shoot	Description
Group IOS	AT1G09350	GolS3	-2.38346	-4.58659	galactinol synthase 3 [Source:NCBI gene (formerly Entrezgene);Acc:837457]
	AT1G22770	GI	-2.33516	-1.59922	gigantea protein (GI) [Source:NCBI gene (formerly Entrezgene);Acc:838883]
	AT1G27730	STZ	-1.23227	-1.02375	salt tolerance zinc finger [Source:NCBI gene (formerly Entrezgene);Acc:839666]
	AT1G53670	MSRB1	-0.576984	-0.52194	methionine sulfoxide reductase B 1 [Source:NCBI gene (formerly Entrezgene);Acc:841804]
	AT1G66330	AT1G66330	-0.414178	-1.07032	senescence-associated family protein [Source:NCBI gene (formerly Entrezgene);Acc:842950]
	AT1G76080	CDSP32	-0.910229	-1.17093	chloroplastic drought-induced stress protein of 32 kD [Source:NCBI gene (formerly Entrezgene);Acc:843940]
	AT1G78380	GSTU19	-0.442236	-0.570641	glutathione S-transferase TAU 19 [Source:NCBI gene (formerly Entrezgene);Acc:844174]
	AT1G79600	AT1G79600	-0.463242	-0.685308	Protein kinase superfamily protein [Source:NCBI gene (formerly Entrezgene);Acc:844298]
	AT2G29450	GSTU5	-1.86318	-2.271	glutathione S-transferase tau 5 [Source:NCBI gene (formerly Entrezgene);Acc:817494]
	AT2G34060	AT2G34060	-0.897982	-0.978969	Peroxidase superfamily protein [Source:NCBI gene (formerly Entrezgene);Acc:817967]
	AT2G37040	PAL1	-0.720983	-0.923904	PHE ammonia lyase 1 [Source:NCBI gene (formerly Entrezgene);Acc:818280]
	AT3G23400	FIB4	-1.49469	-0.873015	Plastid-lipid associated protein PAP / fibrillin family protein [Source:NCBI gene (formerly Entrezgene);Acc:821921]
	AT3G26060	PRXQ	-1.14934	-0.822526	Thioredoxin superfamily protein [Source:NCBI gene (formerly Entrezgene);Acc:822203]
	AT3G52960	AT3G52960	-0.339041	-0.897934	Thioredoxin superfamily protein [Source:NCBI gene (formerly Entrezgene);Acc:824462]
	AT3G53260	PAL2	-0.607547	-0.639166	phenylalanine ammonia-lyase 2 [Source:NCBI gene (formerly Entrezgene);Acc:824493]
	AT3G62030	ROC4	-0.647734	-1.17544	rotamase CYP 4 [Source:NCBI gene (formerly Entrezgene);Acc:825376]
	AT4G09010	TL29	-1.2581	-0.924759	ascorbate peroxidase 4 [Source:NCBI gene (formerly Entrezgene);Acc:826480]
	AT4G11600	GPX6	-0.633671	-0.666873	glutathione peroxidase 6 [Source:NCBI gene (formerly Entrezgene);Acc:826765]
	AT4G25130	PMSR4	-0.582651	-1.01946	peptide met sulfoxide reductase 4 [Source:NCBI gene (formerly Entrezgene);Acc:828616]
	AT4G32770	VTE1	-1.30289	-1.60821	tocopherol cyclase, chloroplast / vitamin E deficient 1 (VTE1) / sucrose export defective 1 (SXD1) [Source:NCBI gene (formerly Entrezgene);Acc:829413]
	AT4G35090	CAT2	-0.300827	-0.56124	catalase 2 [Source:NCBI gene (formerly Entrezgene);Acc:829661]
	AT4G37610	BT5	-0.477591	-0.684228	BTB and TAZ domain protein 5 [Source:NCBI gene (formerly Entrezgene);Acc:829915]
	AT5G05410	DREB2A	-2.14758	-0.78266	DRE-binding protein 2A [Source:NCBI gene (formerly Entrezgene);Acc:830424]
	AT5G13930	TT4	-1.44207	-1.48958	Chalcone and stilbene synthase family protein [Source:NCBI gene (formerly Entrezgene);Acc:831241]
	AT5G21100	AT5G21100	-1.11209	-1.34641	Plant L-ascorbate oxidase [Source:NCBI gene (formerly Entrezgene);Acc:832234]
	AT5G26030	FC1	-0.77321	-0.661186	ferrochelatase 1 [Source:NCBI gene (formerly Entrezgene);Acc:832672]
	AT5G37770	TCH2	-1.40354	-0.991682	EF hand calcium-binding protein family [Source:NCBI gene (formerly Entrezgene);Acc:833755]
	AT5G40370	GRXC2	-0.472747	-0.79653	Glutaredoxin family protein [Source:NCBI gene (formerly Entrezgene);Acc:834035]
	AT5G40390	SIP1	-0.647469	-0.99784	Raffinose synthase family protein [Source:NCBI gene (formerly Entrezgene);Acc:834037]
	AT5G42380	CML37	-1.79016	-1.53749	calmodulin like 37 [Source:NCBI gene (formerly Entrezgene);Acc:834244]
	AT5G47650	NUDT2	-0.764615	-0.697864	nudix hydrolase homolog 2 [Source:NCBI gene (formerly Entrezgene);Acc:834816]
	AT5G52310	LTI78	-1.40775	-0.971845	low-temperature-responsive protein 78 (LTI78) / desiccation-responsive protein 29A (RD29A) [Source:NCBI gene (formerly Entrezgene);Acc:835307]
	AT5G58070	TIL	-0.984625	-0.828341	temperature-induced lipocalin [Source:NCBI gene (formerly Entrezgene);Acc:835919]
	AT5G60890	MYB34	-0.279964	-0.764127	myb domain protein 34 [Source:NCBI gene (formerly Entrezgene);Acc:836210]
	AT5G64940	ATH13	-1.28322	-0.966537	ABC2 homolog 13 [Source:NCBI gene (formerly Entrezgene);Acc:836618]
Group IIOS	AT1G02930	GSTF6	0.698615	0.8601	glutathione S-transferase 6 [Source:NCBI gene (formerly Entrezgene);Acc:839515]
	AT1G03850	GRXS13	0.666939	1.75342	Glutaredoxin family protein [Source:NCBI gene (formerly Entrezgene);Acc:839392]
	AT1G14870	PCR2	0.863636	1.39386	PLANT CADMIUM RESISTANCE 2 [Source:NCBI gene (formerly Entrezgene);Acc:838052]
	AT1G20620	CAT3	0.355735	0.959539	catalase 3 [Source:NCBI gene (formerly Entrezgene);Acc:838651]
	AT1G32230	RCD1	0.307765	0.666983	WWE protein-protein interaction domain protein family [Source:NCBI gene (formerly Entrezgene);Acc:840115]
	AT1G35580	CINV1	0.276299	1.13595	cytosolic invertase 1 [Source:NCBI gene (formerly Entrezgene);Acc:840454]
	AT1G52760	LysoPL2	0.338804	0.473345	lysophospholipase 2 [Source:NCBI gene (formerly Entrezgene);Acc:841709]
	AT1G65970	TPX2	0.943285	2.00524	thioredoxin-dependent peroxidase 2 [Source:NCBI gene (formerly Entrezgene);Acc:842909]
	AT1G73260	KTI1	1.51236	2.28778	kunitz trypsin inhibitor 1 [Source:NCBI gene (formerly Entrezgene);Acc:843660]
	AT1G77120	ADH1	0.532095	2.11262	alcohol dehydrogenase 1 [Source:NCBI gene (formerly Entrezgene);Acc:844047]
	AT3G10985	SAG20	0.37248	1.76292	senescence associated 20 [Source:NCBI gene (formerly Entrezgene);Acc:2745879]
	AT3G20340	AT3G20340	0.719187	2.36617	protein expression protein [Source:NCBI gene (formerly Entrezgene);Acc:821578]
	AT3G48360	BT2	0.439618	1.92996	BTB and TAZ domain protein 2 [Source:NCBI gene (formerly Entrezgene);Acc:823994]
	AT3G57520	SIP2	0.380727	1.50706	seed imbibition 2 [Source:NCBI gene (formerly Entrezgene);Acc:824919]
	AT4G08770	Prx37	0.354152	1.68692	Peroxidase superfamily protein [Source:NCBI gene (formerly Entrezgene);Acc:826447]
	AT4G11850	PLDGAMMA1	0.29842	0.550036	phospholipase D gamma 1 [Source:NCBI gene (formerly Entrezgene);Acc:826791]
	AT4G12570	UPL5	0.332079	1.19514	ubiquitin protein ligase 5 [Source:NCBI gene (formerly Entrezgene);Acc:826870]
	AT4G21830	MSRB7	1.51007	2.56499	methionine sulfoxide reductase B7 [Source:NCBI gene (formerly Entrezgene);Acc:828271]
	AT4G30170	AT4G30170	0.416206	1.25209	Peroxidase family protein [Source:NCBI gene (formerly Entrezgene);Acc:829140]
	AT4G35770	SEN1	1.42526	4.67678	Rhodanese/Cell cycle control phosphatase superfamily protein [Source:NCBI gene (formerly Entrezgene);Acc:829730]
	AT4G37520	AT4G37520	1.02766	1.89277	Peroxidase superfamily protein [Source:NCBI gene (formerly Entrezgene);Acc:829907]
	AT5G20250	DIN10	1.03793	2.56603	Raffinose synthase family protein [Source:NCBI gene (formerly Entrezgene);Acc:832147]
	AT5G27600	LACS7	0.475225	0.715902	long-chain acyl-CoA synthetase 7 [Source:NCBI gene (formerly Entrezgene);Acc:832820]
	AT5G44380	AT5G44380	0.699952	1.53516	FAD-binding Berberine family protein [Source:NCBI gene (formerly Entrezgene);Acc:834464]
	AT5G56550	OXS3	1.77725	1.77432	oxidative stress 3 [Source:NCBI gene (formerly Entrezgene);Acc:835756]
	AT5G63160	BT1	1.27356	2.02481	BTB and TAZ domain protein 1 [Source:NCBI gene (formerly Entrezgene);Acc:836437]
	AT5G64100	AT5G64100	0.492418	1.44258	Peroxidase superfamily protein [Source:NCBI gene (formerly Entrezgene);Acc:836531]
	AT4G21870	AT4G21870	1.58183	0.767609	HSP20-like chaperones superfamily protein [Source:NCBI gene (formerly Entrezgene);Acc:828276]
	AT5G64120	AT5G64120	0.344278	0.853009	Peroxidase superfamily protein [Source:NCBI gene (formerly Entrezgene);Acc:836533]
Group IIIOS	AT1G19570	DHAR1	-0.668413	NS	dehydroascorbate reductase [Source:NCBI gene (formerly Entrezgene);Acc:838544]
	AT1G35910	TPPD	-0.793525	NS	Haloacid dehalogenase-like hydrolase (HAD) superfamily protein [Source:NCBI gene (formerly Entrezgene);Acc:840493]
	AT1G44970	AT1G44970	-0.562692	NS	Peroxidase superfamily protein [Source:NCBI gene (formerly Entrezgene);Acc:841062]
	AT1G45145	TRX5	-0.736741	NS	thioredoxin H-type 5 [Source:NCBI gene (formerly Entrezgene);Acc:841082]
	AT1G68850	AT1G68850	-0.417972	NS	Peroxidase superfamily protein [Source:NCBI gene (formerly Entrezgene);Acc:843218]
	AT2G18150	AT2G18150	-1.47465	NS	Peroxidase superfamily protein [Source:NCBI gene (formerly Entrezgene);Acc:816328]
	AT2G18980	AT2G18980	-0.575082	NS	Peroxidase superfamily protein [Source:NCBI gene (formerly Entrezgene);Acc:816415]
	AT2G38380	AT2G38380	-0.547125	NS	Peroxidase superfamily protein [Source:NCBI gene (formerly Entrezgene);Acc:818419]
	AT2G38390	AT2G38390	-0.914759	NS	Peroxidase superfamily protein [Source:NCBI gene (formerly Entrezgene);Acc:818420]
	AT2G39800	P5CS1	-0.608471	NS	delta1-pyrroline-5-carboxylate synthase 1 [Source:NCBI gene (formerly Entrezgene);Acc:818566]
	AT2G40000	HSPRO2	-0.906802	NS	ortholog of sugar beet HS1 PRO-1 2 [Source:NCBI gene (formerly Entrezgene);Acc:818588]
	AT2G47180	GolS1	-1.5791	NS	galactinol synthase 1 [Source:NCBI gene (formerly Entrezgene);Acc:819331]
	AT3G02840	AT3G02840	-2.28647	NS	ARM repeat superfamily protein [Source:NCBI gene (formerly Entrezgene);Acc:821225]
	AT3G10930	AT3G10930	-0.726074	NS
	AT3G25250	AGC2-1	-0.86217	NS	AGC (cAMP-dependent, cGMP-dependent and protein kinase C) kinase family protein [Source:NCBI gene (formerly Entrezgene);Acc:822119]
	AT4G08780	AT4G08780	-0.619125	NS	Peroxidase superfamily protein [Source:NCBI gene (formerly Entrezgene);Acc:826448]
	AT4G11280	ACS6	-1.65859	NS	1-aminocyclopropane-1-carboxylic acid (acc) synthase 6 [Source:NCBI gene (formerly Entrezgene);Acc:826730]
	AT4G12720	NUDT7	-0.752344	NS	MutT/nudix family protein [Source:NCBI gene (formerly Entrezgene);Acc:826884]
	AT4G17490	ERF6	-0.502186	NS	ethylene responsive element binding factor 6 [Source:NCBI gene (formerly Entrezgene);Acc:827463]
	AT4G20830	AT4G20830	-1.07816	NS	FAD-binding Berberine family protein [Source:NCBI gene (formerly Entrezgene);Acc:827831]
	AT4G34710	ADC2	-0.501972	NS	arginine decarboxylase 2 [Source:NCBI gene (formerly Entrezgene);Acc:829623]
	AT4G36430	AT4G36430	-0.826291	NS	Peroxidase superfamily protein [Source:NCBI gene (formerly Entrezgene);Acc:829795]
	AT5G05340	PRX52	-1.23967	NS	Peroxidase superfamily protein [Source:NCBI gene (formerly Entrezgene);Acc:830416]
	AT5G06290	2-Cys Prx B	-0.607446	NS	2-cysteine peroxiredoxin B [Source:NCBI gene (formerly Entrezgene);Acc:830517]
	AT5G06720	PA2	-1.20101	NS	peroxidase 2 [Source:NCBI gene (formerly Entrezgene);Acc:830561]
	AT5G18100	CSD3	-0.476715	NS	copper/zinc superoxide dismutase 3 [Source:NCBI gene (formerly Entrezgene);Acc:831928]
	AT5G19875	AT5G19875	-1.1011	NS	transmembrane protein [Source:NCBI gene (formerly Entrezgene);Acc:832109]
	AT5G37980	AT5G37980	-1.25572	NS	Zinc-binding dehydrogenase family protein [Source:NCBI gene (formerly Entrezgene);Acc:833777]
	AT5G38000	AT5G38000	-0.602913	NS	Zinc-binding dehydrogenase family protein [Source:NCBI gene (formerly Entrezgene);Acc:833779]
	AT5G46350	WRKY8	-2.70408	NS	WRKY DNA-binding protein 8 [Source:NCBI gene (formerly Entrezgene);Acc:834678]
	AT5G59720	HSP18.2	-1.16556	NS	heat shock protein 18.2 [Source:NCBI gene (formerly Entrezgene);Acc:836093]
Group IVOS	AT1G03680	THM1	NS	-0.638765	thioredoxin M-type 1 [Source:NCBI gene (formerly Entrezgene);Acc:839436]
	AT1G05680	UGT74E2	NS	-2.13856	Uridine diphosphate glycosyltransferase 74E2 [Source:NCBI gene (formerly Entrezgene);Acc:837075]
	AT1G05690	BT3	NS	-0.935758	BTB and TAZ domain protein 3 [Source:NCBI gene (formerly Entrezgene);Acc:837076]
	AT1G07890	APX1	NS	-1.00864	ascorbate peroxidase 1 [Source:NCBI gene (formerly Entrezgene);Acc:837304]
	AT1G12480	OZS1	NS	-0.972343	C4-dicarboxylate transporter/malic acid transport protein [Source:NCBI gene (formerly Entrezgene);Acc:837805]
	AT1G27350	AT1G27350	NS	-0.772974	Ribosome associated membrane protein RAMP4 [Source:NCBI gene (formerly Entrezgene);Acc:839624]
	AT1G32220	AT1G32220	NS	-1.10134	NAD(P)-binding Rossmann-fold superfamily protein [Source:NCBI gene (formerly Entrezgene);Acc:840114]
	AT1G54050	AT1G54050	NS	-1.56263	HSP20-like chaperones superfamily protein [Source:NCBI gene (formerly Entrezgene);Acc:841843]
	AT1G72520	LOX4	NS	-0.640933	PLAT/LH2 domain-containing lipoxygenase family protein [Source:NCBI gene (formerly Entrezgene);Acc:843584]
	AT1G75100	JAC1	NS	-0.772374	J-domain protein required for chloroplast accumulation response 1 [Source:NCBI gene (formerly Entrezgene);Acc:843847]
	AT1G75280	AT1G75280	NS	-0.978399	NmrA-like negative transcriptional regulator family protein [Source:NCBI gene (formerly Entrezgene);Acc:843865]
	AT1G77490	TAPX	NS	-0.551902	thylakoidal ascorbate peroxidase [Source:NCBI gene (formerly Entrezgene);Acc:844085]
	AT2G16500	ADC1	NS	-1.15711	arginine decarboxylase 1 [Source:NCBI gene (formerly Entrezgene);Acc:816149]
	AT2G19310	AT2G19310	NS	-1.54624	HSP20-like chaperones superfamily protein [Source:NCBI gene (formerly Entrezgene);Acc:816448]
	AT2G20270	AT2G20270	NS	-0.562788	Thioredoxin superfamily protein [Source:NCBI gene (formerly Entrezgene);Acc:816546]
	AT2G31570	GPX2	NS	-0.414533	glutathione peroxidase 2 [Source:NCBI gene (formerly Entrezgene);Acc:817715]
	AT2G37860	LCD1	NS	-0.854017	reticulata-like protein, putative (DUF3411) [Source:NCBI gene (formerly Entrezgene);Acc:818362]
	AT2G39460	RPL23AA	NS	-0.595825	ribosomal protein L23AA [Source:NCBI gene (formerly Entrezgene);Acc:818531]
	AT2G40750	WRKY54	NS	-1.07525	WRKY DNA-binding protein 54 [Source:NCBI gene (formerly Entrezgene);Acc:818670]
	AT2G41090	AT2G41090	NS	-1.01028	Calcium-binding EF-hand family protein [Source:NCBI gene (formerly Entrezgene);Acc:818708]
	AT2G41680	NTRC	NS	-0.707193	NADPH-dependent thioredoxin reductase C [Source:NCBI gene (formerly Entrezgene);Acc:818766]
	AT3G04120	GAPC1	NS	-0.859823	glyceraldehyde-3-phosphate dehydrogenase C subunit 1 [Source:NCBI gene (formerly Entrezgene);Acc:819567]
	AT3G06050	PRXIIF	NS	-0.639353	peroxiredoxin IIF [Source:NCBI gene (formerly Entrezgene);Acc:819778]
	AT3G10920	MSD1	NS	-0.496194	manganese superoxide dismutase 1 [Source:NCBI gene (formerly Entrezgene);Acc:820263]
	AT3G11630	AT3G11630	NS	-0.709013	Thioredoxin superfamily protein [Source:NCBI gene (formerly Entrezgene);Acc:820335]
	AT3G12260	AT3G12260	NS	-0.457968	LYR family of Fe/S cluster biosis protein [Source:NCBI gene (formerly Entrezgene);Acc:820406]
	AT3G15360	TRX-M4	NS	-1.12294	thioredoxin M-type 4 [Source:NCBI gene (formerly Entrezgene);Acc:820775]
	AT3G16670	AT3G16670	NS	-1.23672	Pollen Ole e 1 allergen and extensin family protein [Source:NCBI gene (formerly Entrezgene);Acc:820919]
	AT3G17070	AT3G17070	NS	-0.657309	Peroxidase family protein [Source:NCBI gene (formerly Entrezgene);Acc:820964]
	AT3G17800	AT3G17800	NS	-0.592071	alanine-tRNA ligase, putative (DUF760) [Source:NCBI gene (formerly Entrezgene);Acc:821048]
	AT3G25530	GLYR1	NS	-0.850096	glyoxylate reductase 1 [Source:NCBI gene (formerly Entrezgene);Acc:822139]
	AT3G47860	CHL	NS	-0.380253	chloroplastic lipocalin [Source:NCBI gene (formerly Entrezgene);Acc:823942]
	AT3G49260	iqd21	NS	-0.607643	IQ-domain 21 [Source:NCBI gene (formerly Entrezgene);Acc:824087]
	AT3G53990	AT3G53990	NS	-0.502299	Adenine nucleotide alpha hydrolases-like superfamily protein [Source:NCBI gene (formerly Entrezgene);Acc:824566]
	AT3G55280	RPL23AB	NS	-0.640518	ribosomal protein L23AB [Source:NCBI gene (formerly Entrezgene);Acc:824694]
	AT3G56400	WRKY70	NS	-1.38728	WRKY DNA-binding protein 70 [Source:NCBI gene (formerly Entrezgene);Acc:824807]
	AT4G00860	ATOZI1	NS	-0.576453	monopolar spindle protein (DUF1138) [Source:NCBI gene (formerly Entrezgene);Acc:826213]
	AT4G08390	SAPX	NS	-0.58552	stromal ascorbate peroxidase [Source:NCBI gene (formerly Entrezgene);Acc:826396]
	AT4G09320	NDPK1	NS	-0.604755	nucleoside diphosphate kinase [Source:NCBI gene (formerly Entrezgene);Acc:826515]
	AT4G12000	AT4G12000	NS	-1.46507	SNARE associated Golgi protein family [Source:NCBI gene (formerly Entrezgene);Acc:826807]
	AT4G17040	CLPR4	NS	-0.443062	CLP protease R subunit 4 [Source:NCBI gene (formerly Entrezgene);Acc:827412]
	AT4G28730	GrxC5	NS	-0.622329	Glutaredoxin family protein [Source:NCBI gene (formerly Entrezgene);Acc:828994]
	AT4G31870	GPX7	NS	-2.36581	glutathione peroxidase 7 [Source:NCBI gene (formerly Entrezgene);Acc:829316]
	AT4G35460	NTRB	NS	-0.881473	NADPH-dependent thioredoxin reductase B [Source:NCBI gene (formerly Entrezgene);Acc:829698]
	AT5G01410	RSR4	NS	-0.545409	Aldolase-type TIM barrel family protein [Source:NCBI gene (formerly Entrezgene);Acc:831738]
	AT5G01820	SR1	NS	-0.991161	serine/threonine protein kinase 1 [Source:NCBI gene (formerly Entrezgene);Acc:831765]
	AT5G07460	PMSR2	NS	-0.506957	peptidemethionine sulfoxide reductase 2 [Source:NCBI gene (formerly Entrezgene);Acc:830637]
	AT5G12080	MSL10	NS	-1.02185	mechanosensitive channel of small conductance-like 10 [Source:NCBI gene (formerly Entrezgene);Acc:831081]
	AT5G13650	SVR3	NS	-0.589154	elongation factor family protein [Source:NCBI gene (formerly Entrezgene);Acc:831209]
	AT5G16990	AT5G16990	NS	-1.00292	Zinc-binding dehydrogenase family protein [Source:NCBI gene (formerly Entrezgene);Acc:831562]
	AT5G17000	AT5G17000	NS	-0.583239	Zinc-binding dehydrogenase family protein [Source:NCBI gene (formerly Entrezgene);Acc:831563]
	AT5G20140	HBP5	NS	-1.02279	SOUL heme-binding family protein [Source:NCBI gene (formerly Entrezgene);Acc:832136]
	AT5G23310	FSD3	NS	-0.968086	Fe superoxide dismutase 3 [Source:NCBI gene (formerly Entrezgene);Acc:832395]
	AT5G28030	DES1	NS	-2.29184	L-cysteine desulfhydrase 1 [Source:NCBI gene (formerly Entrezgene);Acc:832873]
	AT5G42980	TRX3	NS	-0.506737	thioredoxin 3 [Source:NCBI gene (formerly Entrezgene);Acc:834313]
	AT5G43750	PnsB5	NS	-1.71761	NAD(P)H dehydrogenase 18 [Source:NCBI gene (formerly Entrezgene);Acc:834396]
	AT5G44650	CEST	NS	-1.028	death domain associated protein [Source:NCBI gene (formerly Entrezgene);Acc:834494]
	AT5G55120	VTC5	NS	-0.452634	GDP-L-galactose phosphorylase VITAMIN C DEFECTIVE 5 (VTC5) [Source:NCBI gene (formerly Entrezgene);Acc:835603]
	AT5G57345	AT5G57345	NS	-0.944897	transmembrane protein [Source:NCBI gene (formerly Entrezgene);Acc:835840]
	AT5G63310	NDPK2	NS	-0.942189	nucleoside diphosphate kinase 2 [Source:NCBI gene (formerly Entrezgene);Acc:836451]
	AT5G63980	SAL1	NS	-1.15827	SAL1 phosphatase-like protein [Source:NCBI gene (formerly Entrezgene);Acc:836519]
	AT5G64110	AT5G64110	NS	-1.01024	Peroxidase superfamily protein [Source:NCBI gene (formerly Entrezgene);Acc:836532]
Group VOS	AT1G15520	ABCG40	0.971127	NS	pleiotropic drug resistance 12 [Source:NCBI gene (formerly Entrezgene);Acc:838122]
	AT1G34510	AT1G34510	1.84256	NS	Peroxidase superfamily protein [Source:NCBI gene (formerly Entrezgene);Acc:840353]
	AT1G60740	AT1G60740	1.32175	NS	Thioredoxin superfamily protein [Source:NCBI gene (formerly Entrezgene);Acc:842368]
	AT1G71695	AT1G71695	0.745981	NS	Peroxidase superfamily protein [Source:NCBI gene (formerly Entrezgene);Acc:843498]
	AT3G01420	DOX1	0.910521	NS	Peroxidase superfamily protein [Source:NCBI gene (formerly Entrezgene);Acc:821135]
	AT3G13610	AT3G13610	0.643669	NS	2-oxoglutarate (2OG) and Fe(II)-dependent oxygenase superfamily protein [Source:NCBI gene (formerly Entrezgene);Acc:820564]
	AT3G17790	PAP17	1.84559	NS	purple acid phosphatase 17 [Source:NCBI gene (formerly Entrezgene);Acc:821047]
	AT4G11170	AT4G11170	1.27083	NS	Disease resistance protein (TIR-NBS-LRR class) family [Source:NCBI gene (formerly Entrezgene);Acc:826718]
	AT4G11290	AT4G11290	0.57277	NS	Peroxidase superfamily protein [Source:NCBI gene (formerly Entrezgene);Acc:826731]
	AT4G14030	SBP1	0.3139	NS	selenium-binding protein 1 [Source:NCBI gene (formerly Entrezgene);Acc:827039]
	AT5G19890	AT5G19890	2.10315	NS	Peroxidase superfamily protein [Source:NCBI gene (formerly Entrezgene);Acc:832111]
	AT5G21940	AT5G21940	0.858364	NS	hybrid signal transduction histidine kinase M-like protein [Source:NCBI gene (formerly Entrezgene);Acc:832254]
	AT5G25620	YUC6	0.447934	NS	Flavin-binding monooxygenase family protein [Source:NCBI gene (formerly Entrezgene);Acc:832638]
	AT5G58940	CRCK1	0.552527	NS	calmodulin-binding receptor-like cytoplasmic kinase 1 [Source:NCBI gene (formerly Entrezgene);Acc:836011]
Group VIOS	AT1G07530	SCL14	NS	0.590837	SCARECROW-like 14 [Source:NCBI gene (formerly Entrezgene);Acc:837267]
	AT1G09970	LRR XI-23	NS	0.794763	Leucine-rich receptor-like protein kinase family protein [Source:NCBI gene (formerly Entrezgene);Acc:837531]
	AT1G15380	GLYI4	NS	1.23081	Lactoylglutathione lyase / glyoxalase I family protein [Source:NCBI gene (formerly Entrezgene);Acc:838107]
	AT1G27510	EX2	NS	0.428431	UvrB/UvrC domain protein (DUF3506) [Source:NCBI gene (formerly Entrezgene);Acc:839642]
	AT1G34370	STOP1	NS	1.22001	C2H2 and C2HC zinc fingers superfamily protein [Source:NCBI gene (formerly Entrezgene);Acc:840339]
	AT1G49540	ELP2	NS	0.775006	elongator protein 2 [Source:NCBI gene (formerly Entrezgene);Acc:841378]
	AT1G52200	AT1G52200	NS	1.86607	PLAC8 family protein [Source:NCBI gene (formerly Entrezgene);Acc:841650]
	AT1G73120	AT1G73120	NS	2.14767	F-box/RNI superfamily protein [Source:NCBI gene (formerly Entrezgene);Acc:843643]
	AT2G19810	OZF1	NS	1.18757	CCCH-type zinc finger family protein [Source:NCBI gene (formerly Entrezgene);Acc:816500]
	AT2G23140	PUB4	NS	0.633303	RING/U-box superfamily protein with ARM repeat domain-containing protein [Source:NCBI gene (formerly Entrezgene);Acc:816846]
	AT2G37130	AT2G37130	NS	2.29342	Peroxidase superfamily protein [Source:NCBI gene (formerly Entrezgene);Acc:818289]
	AT2G43790	MPK6	NS	0.746023	MAP kinase 6 [Source:NCBI gene (formerly Entrezgene);Acc:818982]
	AT3G02860	AT3G02860	NS	0.565218	zinc ion binding protein [Source:NCBI gene (formerly Entrezgene);Acc:821212]
	AT3G05970	LACS6	NS	0.446896	long-chain acyl-CoA synthetase 6 [Source:NCBI gene (formerly Entrezgene);Acc:819767]
	AT3G06590	AT3G06590	NS	0.775967	basic helix-loop-helix (bHLH) DNA-binding superfamily protein [Source:NCBI gene (formerly Entrezgene);Acc:819838]
	AT3G08670	AT3G08670	NS	0.896817	serine/arginine repetitive matrix-like protein [Source:NCBI gene (formerly Entrezgene);Acc:820014]
	AT3G10020	AT3G10020	NS	1.00945	plant/protein [Source:NCBI gene (formerly Entrezgene);Acc:820163]
	AT3G21650	AT3G21650	NS	0.616177	Protein phosphatase 2A regulatory B subunit family protein [Source:NCBI gene (formerly Entrezgene);Acc:821719]
	AT3G22380	TIC	NS	0.730964	time for coffee [Source:NCBI gene (formerly Entrezgene);Acc:821807]
	AT3G29035	NAC3	NS	1.44517	NAC domain containing protein 3 [Source:NCBI gene (formerly Entrezgene);Acc:822547]
	AT3G30775	ERD5	NS	1.58913	Methylenetetrahydrofolate reductase family protein [Source:NCBI gene (formerly Entrezgene);Acc:822833]
	AT3G49120	PRXCB	NS	0.486394	peroxidase CB [Source:NCBI gene (formerly Entrezgene);Acc:824073]
	AT3G56090	FER3	NS	0.674996	ferritin 3 [Source:NCBI gene (formerly Entrezgene);Acc:824775]
	AT3G60980	AT3G60980	NS	0.701114	Tetratricopeptide repeat (TPR)-like superfamily protein [Source:NCBI gene (formerly Entrezgene);Acc:825270]
	AT3G62770	AtATG18a	NS	1.1915	Transducin/WD40 repeat-like superfamily protein [Source:NCBI gene (formerly Entrezgene);Acc:825452]
	AT3G63080	GPX5	NS	0.567475	glutathione peroxidase 5 [Source:NCBI gene (formerly Entrezgene);Acc:825483]
	AT4G08920	CRY1	NS	0.384196	cryptochrome 1 [Source:NCBI gene (formerly Entrezgene);Acc:826470]
	AT4G11830	PLDGAMMA2	NS	0.591633	phospholipase D gamma 2 [Source:NCBI gene (formerly Entrezgene);Acc:826789]
	AT4G13540	AT4G13540	NS	1.17841	golgin family A protein [Source:NCBI gene (formerly Entrezgene);Acc:826986]
	AT4G17070	AT4G17070	NS	1.37951	peptidyl-prolyl cis-trans isomerase [Source:NCBI gene (formerly Entrezgene);Acc:827415]
	AT4G20380	LSD1	NS	0.719461	LSD1 zinc finger family protein [Source:NCBI gene (formerly Entrezgene);Acc:827786]
	AT4G24520	ATR1	NS	0.578397	P450 reductase 1 [Source:NCBI gene (formerly Entrezgene);Acc:828554]
	AT4G31510	AT4G31510	NS	0.697508	major centromere autoantigen B-like protein [Source:NCBI gene (formerly Entrezgene);Acc:829278]
	AT4G34890	XDH1	NS	0.800282	xanthine dehydrogenase 1 [Source:NCBI gene (formerly Entrezgene);Acc:829641]
	AT4G37530	AT4G37530	NS	0.724903	Peroxidase superfamily protein [Source:NCBI gene (formerly Entrezgene);Acc:829908]
	AT5G03280	EIN2	NS	0.495792	NRAMP metal ion transporter family protein [Source:NCBI gene (formerly Entrezgene);Acc:831889]
	AT5G13240	AT5G13240	NS	0.563075	transcription regulator [Source:NCBI gene (formerly Entrezgene);Acc:831164]
	AT5G16470	AT5G16470	NS	0.441147	zinc finger (C2H2 type) family protein [Source:NCBI gene (formerly Entrezgene);Acc:831508]
	AT5G20230	BCB	NS	1.80014	blue-copper-binding protein [Source:NCBI gene (formerly Entrezgene);Acc:832145]
	AT5G24890	AT5G24890	NS	1.00506	stress response NST1-like protein [Source:NCBI gene (formerly Entrezgene);Acc:832558]
	AT5G39580	AT5G39580	NS	2.1456	Peroxidase superfamily protein [Source:NCBI gene (formerly Entrezgene);Acc:833954]
	AT5G39610	NAC6	NS	2.82689	NAC domain containing protein 6 [Source:NCBI gene (formerly Entrezgene);Acc:833957]
	AT5G41150	UVH1	NS	0.551089	Restriction endonuclease, type II-like superfamily protein [Source:NCBI gene (formerly Entrezgene);Acc:834117]
	AT5G44660	AT5G44660	NS	0.701159
	AT5G54500	FQR1	NS	0.95093	flavodoxin-like quinone reductase 1 [Source:NCBI gene (formerly Entrezgene);Acc:835538]
	AT5G54810	TSB1	NS	0.477527	tryptophan synthase beta-subunit 1 [Source:NCBI gene (formerly Entrezgene);Acc:835571]
Group VIIOS	AT4G02380	SAG21	-0.885489	2.19056	senescence-associated 21 [Source:NCBI gene (formerly Entrezgene);Acc:828053]
	AT4G33420	AT4G33420	-0.833653	0.556833	Peroxidase superfamily protein [Source:NCBI gene (formerly Entrezgene);Acc:829479]
	AT5G01600	FER1	-0.440995	1.38444	ferretin 1 [Source:NCBI gene (formerly Entrezgene);Acc:831720]
	AT5G66390	AT5G66390	-0.385349	1.28996	Peroxidase superfamily protein [Source:NCBI gene (formerly Entrezgene);Acc:836771]
	AT5G67480	BT4	-0.622453	1.91528	BTB and TAZ domain protein 4 [Source:NCBI gene (formerly Entrezgene);Acc:836884]

## Sheet: Group I-OS
GO- and Transcription Factor- Enrichment analyses of group-IOS genes			DEG Expcression log2 FC (FL/GC)
Gene Annotation			Root	adc1-R	OXPtADC-R	cdr7/cuao3-R	OXCuAO3-R	Shoot	adc1-S	OXPtADC-S	cdr7/cuao3-S	OXCuAO3-S	Annotation
Gene ID	Symbol	Description	Col	adc1	OXPtADC	cdr7/cuao3	OXCuAO3	Col	adc1	OXPtADC	cdr7/cuao3	OXCuAO3
AT1G09350	GolS3	galactinol synthase 3 [Source:NCBI gene (formerly Entrezgene);Acc:837457]	-2.38346	-2.59672	NS	-2.86478	-3.30368	-4.58659	-3.0736	-3.53377	-3.24658	-3.08774	galactinol synthase 3 (GolS3); CONTAINS InterPro DOMAIN/s: Glycosyl transferase, family 8 (InterPro:IPR002495); BEST Arabidopsis thaliana protein match is: galactinol synthase 2 (TAIR:AT1G56600.1); Has 1260 Blast hits to 1259 proteins in 288 species: Archae - 0; Bacteria - 98; Metazoa - 258; Fungi - 282; Plants - 479; Viruses - 73; Other Eukaryotes - 70 (source: NCBI BLink).
AT1G22770	GI	gigantea protein (GI) [Source:NCBI gene (formerly Entrezgene);Acc:838883]	-2.33516	-1.72343	NS	NS	-2.00715	-1.59922	NS	NS	NS	NS	GIGANTEA (GI); Has 351 Blast hits to 349 proteins in 54 species: Archae - 0; Bacteria - 0; Metazoa - 0; Fungi - 0; Plants - 351; Viruses - 0; Other Eukaryotes - 0 (source: NCBI BLink).
AT1G27730	STZ	salt tolerance zinc finger [Source:NCBI gene (formerly Entrezgene);Acc:839666]	-1.23227	NS	NS	NS	NS	-1.02375	NS	NS	NS	NS	salt tolerance zinc finger (STZ); CONTAINS InterPro DOMAIN/s: Zinc finger, C2H2-like (InterPro:IPR015880), Zinc finger, C2H2-type (InterPro:IPR007087); BEST Arabidopsis thaliana protein match is: zinc finger of Arabidopsis thaliana 6 (TAIR:AT5G04340.1); Has 5350 Blast hits to 3982 proteins in 146 species: Archae - 0; Bacteria - 0; Metazoa - 4198; Fungi - 48; Plants - 937; Viruses - 0; Other Eukar…
AT1G53670	MSRB1	methionine sulfoxide reductase B 1 [Source:NCBI gene (formerly Entrezgene);Acc:841804]	-0.576984	NS	NS	NS	NS	-0.52194	-0.438	NS	NS	NS	methionine sulfoxide reductase B 1 (MSRB1); FUNCTIONS IN: peptide-methionine-(S)-S-oxide reductase activity; INVOLVED IN: response to oxidative stress, N-terminal protein myristoylation; LOCATED IN: chloroplast stroma, chloroplast; EXPRESSED IN: 23 plant structures; EXPRESSED DURING: 13 growth stages; CONTAINS InterPro DOMAIN/s: Methionine sulphoxide reductase B (InterPro:IPR002579), Mss4-like (I…
AT1G66330	AT1G66330	senescence-associated family protein [Source:NCBI gene (formerly Entrezgene);Acc:842950]	-0.414178	NS	NS	NS	NS	-1.07032	-0.823291	NS	NS	-0.858982	senescence-associated family protein; Has 54 Blast hits to 54 proteins in 21 species: Archae - 0; Bacteria - 13; Metazoa - 0; Fungi - 0; Plants - 41; Viruses - 0; Other Eukaryotes - 0 (source: NCBI BLink).
AT1G76080	CDSP32	chloroplastic drought-induced stress protein of 32 kD [Source:NCBI gene (formerly Entrezgene);Acc:843940]	-0.910229	NS	NS	NS	NS	-1.17093	-0.620953	NS	NS	-0.695385	chloroplastic drought-induced stress protein of 32 kD (CDSP32); INVOLVED IN: cell redox homeostasis; LOCATED IN: chloroplast stroma, chloroplast, chloroplast envelope; EXPRESSED IN: 23 plant structures; EXPRESSED DURING: 14 growth stages; CONTAINS InterPro DOMAIN/s: Thioredoxin fold (InterPro:IPR012335), Thioredoxin, core (InterPro:IPR015467), Thioredoxin domain (InterPro:IPR013766), Thioredoxin-…
AT1G78380	GSTU19	glutathione S-transferase TAU 19 [Source:NCBI gene (formerly Entrezgene);Acc:844174]	-0.442236	NS	-0.556437	-0.721463	-0.5031	-0.570641	NS	NS	NS	NS	glutathione S-transferase TAU 19 (GSTU19); FUNCTIONS IN: glutathione transferase activity, glutathione binding; INVOLVED IN: response to oxidative stress, response to cadmium ion, response to cyclopentenone, toxin catabolic process, cellular response to water deprivation; LOCATED IN: chloroplast, plasma membrane, chloroplast stroma, cytoplasm; EXPRESSED IN: 26 plant structures; EXPRESSED DURING: …
AT1G79600	AT1G79600	Protein kinase superfamily protein [Source:NCBI gene (formerly Entrezgene);Acc:844298]	-0.463242	NS	NS	NS	NS	-0.685308	-0.477223	-0.770974	NS	-0.760325	Protein kinase superfamily protein; FUNCTIONS IN: protein kinase activity, ATP binding; INVOLVED IN: protein amino acid phosphorylation; LOCATED IN: chloroplast, plastoglobule; EXPRESSED IN: 21 plant structures; EXPRESSED DURING: 13 growth stages; CONTAINS InterPro DOMAIN/s: ABC-1 (InterPro:IPR004147), Protein kinase, catalytic domain (InterPro:IPR000719), Aminoglycoside phosphotransferase (Inter…
AT2G29450	GSTU5	glutathione S-transferase tau 5 [Source:NCBI gene (formerly Entrezgene);Acc:817494]	-1.86318	-1.37589	-1.16094	NS	-1.3896	-2.271	NS	NS	NS	-1.33703	glutathione S-transferase tau 5 (GSTU5); FUNCTIONS IN: glutathione transferase activity, glutathione binding; INVOLVED IN: response to oxidative stress, toxin catabolic process; LOCATED IN: plasma membrane, cytoplasm; EXPRESSED IN: 23 plant structures; EXPRESSED DURING: 13 growth stages; CONTAINS InterPro DOMAIN/s: Thioredoxin fold (InterPro:IPR012335), Glutathione S-transferase, C-terminal (Inte…
AT2G34060	AT2G34060	Peroxidase superfamily protein [Source:NCBI gene (formerly Entrezgene);Acc:817967]	-0.897982	NS	NS	NS	NS	-0.978969	NS	NS	NS	-1.04456	Peroxidase superfamily protein; FUNCTIONS IN: peroxidase activity, heme binding; INVOLVED IN: response to oxidative stress, oxidation reduction; LOCATED IN: endomembrane system; EXPRESSED IN: root, flower; EXPRESSED DURING: petal differentiation and expansion stage; CONTAINS InterPro DOMAIN/s: Haem peroxidase (InterPro:IPR010255), Plant peroxidase (InterPro:IPR000823), Peroxidases heam-ligand bin…
AT2G37040	PAL1	PHE ammonia lyase 1 [Source:NCBI gene (formerly Entrezgene);Acc:818280]	-0.720983	NS	-0.599204	-0.82719	-0.700861	-0.923904	-0.776808	-1.21525	-0.690232	-1.29646	PHE ammonia lyase 1 (PAL1); FUNCTIONS IN: phenylalanine ammonia-lyase activity; INVOLVED IN: in 10 processes; LOCATED IN: cytoplasm; EXPRESSED IN: 22 plant structures; EXPRESSED DURING: 13 growth stages; CONTAINS InterPro DOMAIN/s: Phenylalanine/histidine ammonia-lyase (InterPro:IPR001106), Phenylalanine/histidine ammonia-lyases, active site (InterPro:IPR022313), L-Aspartase-like (InterPro:IPR008…
AT3G23400	FIB4	Plastid-lipid associated protein PAP / fibrillin family protein [Source:NCBI gene (formerly Entrezgene);Acc:821921]	-1.49469	NS	NS	NS	-0.602494	-0.873015	-0.6946	NS	-0.868944	-0.763668	fibrillin 4 (FIB4); FUNCTIONS IN: structural molecule activity; LOCATED IN: in 8 components; EXPRESSED IN: 24 plant structures; EXPRESSED DURING: 14 growth stages; CONTAINS InterPro DOMAIN/s: Plastid lipid-associated protein/fibrillin (InterPro:IPR006843); BEST Arabidopsis thaliana protein match is: Plastid-lipid associated protein PAP / fibrillin family protein (TAIR:AT3G26070.1); Has 367 Blast …
AT3G26060	PRXQ	Thioredoxin superfamily protein [Source:NCBI gene (formerly Entrezgene);Acc:822203]	-1.14934	NS	NS	NS	NS	-0.822526	-0.811457	NS	NS	-0.978179	ATPRX Q; FUNCTIONS IN: peroxiredoxin activity, antioxidant activity; INVOLVED IN: cell redox homeostasis; LOCATED IN: chloroplast stromal thylakoid, chloroplast thylakoid membrane, chloroplast, plastoglobule, chloroplast envelope; EXPRESSED IN: 25 plant structures; EXPRESSED DURING: 14 growth stages; CONTAINS InterPro DOMAIN/s: Thioredoxin fold (InterPro:IPR012335), Alkyl hydroperoxide reductase/…
AT3G52960	AT3G52960	Thioredoxin superfamily protein [Source:NCBI gene (formerly Entrezgene);Acc:824462]	-0.339041	NS	NS	NS	NS	-0.897934	-0.921336	-0.875918	-0.827121	-1.21468	Thioredoxin superfamily protein; FUNCTIONS IN: oxidoreductase activity, antioxidant activity; INVOLVED IN: defense response to bacterium, peptidyl-cysteine S-nitrosylation; LOCATED IN: thylakoid, chloroplast stroma, chloroplast, plant-type cell wall; EXPRESSED IN: 25 plant structures; EXPRESSED DURING: 15 growth stages; CONTAINS InterPro DOMAIN/s: Thioredoxin fold (InterPro:IPR012335), Thioredoxi…
AT3G53260	PAL2	phenylalanine ammonia-lyase 2 [Source:NCBI gene (formerly Entrezgene);Acc:824493]	-0.607547	NS	NS	NS	-0.455527	-0.639166	-0.481372	-0.69084	-0.424987	-0.563625	phenylalanine ammonia-lyase 2 (PAL2); FUNCTIONS IN: phenylalanine ammonia-lyase activity; INVOLVED IN: response to oxidative stress, response to karrikin, phenylpropanoid biosynthetic process, response to wounding, defense response; LOCATED IN: cytoplasm; EXPRESSED IN: 22 plant structures; EXPRESSED DURING: 14 growth stages; CONTAINS InterPro DOMAIN/s: Phenylalanine/histidine ammonia-lyase (Inter…
AT3G62030	ROC4	rotamase CYP 4 [Source:NCBI gene (formerly Entrezgene);Acc:825376]	-0.647734	NS	NS	NS	-0.548818	-1.17544	-0.746335	-0.75394	-0.984724	-0.872241	rotamase CYP 4 (ROC4); FUNCTIONS IN: peptidyl-prolyl cis-trans isomerase activity; INVOLVED IN: in 9 processes; LOCATED IN: in 8 components; EXPRESSED IN: 26 plant structures; EXPRESSED DURING: 15 growth stages; CONTAINS InterPro DOMAIN/s: Cyclophilin-like (InterPro:IPR015891), Peptidyl-prolyl cis-trans isomerase, cyclophilin-type (InterPro:IPR002130), Peptidyl-prolyl cis-trans isomerase, cycloph…
AT4G09010	TL29	ascorbate peroxidase 4 [Source:NCBI gene (formerly Entrezgene);Acc:826480]	-1.2581	NS	NS	NS	NS	-0.924759	-0.769371	-0.706885	-0.696631	-0.60997	ascorbate peroxidase 4 (APX4); FUNCTIONS IN: peroxidase activity, heme binding; INVOLVED IN: oxidation reduction, response to oxidative stress; LOCATED IN: in 7 components; EXPRESSED IN: 22 plant structures; EXPRESSED DURING: 15 growth stages; CONTAINS InterPro DOMAIN/s: Haem peroxidase (InterPro:IPR010255), Plant ascorbate peroxidase (InterPro:IPR002207), Haem peroxidase, plant/fungal/bacterial …
AT4G11600	GPX6	glutathione peroxidase 6 [Source:NCBI gene (formerly Entrezgene);Acc:826765]	-0.633671	NS	-0.943571	-1.17992	-0.792847	-0.666873	NS	NS	NS	NS	glutathione peroxidase 6 (GPX6); FUNCTIONS IN: glutathione peroxidase activity; INVOLVED IN: response to oxidative stress, response to cadmium ion, response to salt stress, response to metal ion; LOCATED IN: cytosol, mitochondrion, chloroplast, plasma membrane; EXPRESSED IN: 26 plant structures; EXPRESSED DURING: 14 growth stages; CONTAINS InterPro DOMAIN/s: Thioredoxin fold (InterPro:IPR012335),…
AT4G25130	PMSR4	peptide met sulfoxide reductase 4 [Source:NCBI gene (formerly Entrezgene);Acc:828616]	-0.582651	NS	NS	NS	-0.506814	-1.01946	-0.816392	-0.597714	-0.845837	-0.81414	peptide met sulfoxide reductase 4 (PMSR4); FUNCTIONS IN: peptide-methionine-(S)-S-oxide reductase activity; INVOLVED IN: protein modification process, cellular response to oxidative stress; LOCATED IN: chloroplast stroma, chloroplast; EXPRESSED IN: 25 plant structures; EXPRESSED DURING: 16 growth stages; CONTAINS InterPro DOMAIN/s: Peptide methionine sulphoxide reductase MsrA (InterPro:IPR002569)…
AT4G32770	VTE1	tocopherol cyclase, chloroplast / vitamin E deficient 1 (VTE1) / sucrose export defective 1 (SXD1) [Source:NCBI gene (formerly Entrezgene);Acc:829413]	-1.30289	NS	NS	NS	-0.989688	-1.60821	-0.99927	-1.19035	-1.16723	-1.42321	VITAMIN E DEFICIENT 1 (VTE1); FUNCTIONS IN: tocopherol cyclase activity; INVOLVED IN: in 9 processes; LOCATED IN: chloroplast, plastoglobule, chloroplast inner membrane; EXPRESSED IN: 23 plant structures; EXPRESSED DURING: 13 growth stages; Has 30201 Blast hits to 17322 proteins in 780 species: Archae - 12; Bacteria - 1396; Metazoa - 17338; Fungi - 3422; Plants - 5037; Viruses - 0; Other Eukaryot…
AT4G35090	CAT2	catalase 2 [Source:NCBI gene (formerly Entrezgene);Acc:829661]	-0.300827	NS	NS	NS	NS	-0.56124	-0.448599	NS	-0.380715	-1.03127	catalase 2 (CAT2); FUNCTIONS IN: protein binding, catalase activity, cobalt ion binding; INVOLVED IN: in 10 processes; LOCATED IN: mitochondrion, cytosolic ribosome, stromule, peroxisome, chloroplast; EXPRESSED IN: 25 plant structures; EXPRESSED DURING: 16 growth stages; CONTAINS InterPro DOMAIN/s: Catalase (InterPro:IPR002226), Catalase related subgroup (InterPro:IPR018028), Catalase-like domain…
AT4G37610	BT5	BTB and TAZ domain protein 5 [Source:NCBI gene (formerly Entrezgene);Acc:829915]	-0.477591	NS	NS	NS	NS	-0.684228	NS	NS	NS	NS	BTB and TAZ domain protein 5 (BT5); CONTAINS InterPro DOMAIN/s: BTB/POZ (InterPro:IPR013069), Zinc finger, TAZ-type (InterPro:IPR000197), BTB/POZ fold (InterPro:IPR011333), Kelch related (InterPro:IPR013089), BTB/POZ-like (InterPro:IPR000210); BEST Arabidopsis thaliana protein match is: BTB and TAZ domain protein 4 (TAIR:AT5G67480.2); Has 30201 Blast hits to 17322 proteins in 780 species: Archae …
AT5G05410	DREB2A	DRE-binding protein 2A [Source:NCBI gene (formerly Entrezgene);Acc:830424]	-2.14758	NS	NS	NS	-1.06277	-0.78266	NS	NS	-1.09028	NS	DRE-binding protein 2A (DREB2A); CONTAINS InterPro DOMAIN/s: DNA-binding, integrase-type (InterPro:IPR016177), Pathogenesis-related transcriptional factor/ERF, DNA-binding (InterPro:IPR001471); BEST Arabidopsis thaliana protein match is: DRE/CRT-binding protein 2B (TAIR:AT3G11020.1); Has 1807 Blast hits to 1807 proteins in 277 species: Archae - 0; Bacteria - 0; Metazoa - 736; Fungi - 347; Plants …
AT5G13930	TT4	Chalcone and stilbene synthase family protein [Source:NCBI gene (formerly Entrezgene);Acc:831241]	-1.44207	NS	NS	NS	-0.96189	-1.48958	-1.35767	-2.08953	-1.64781	-2.22942	TRANSPARENT TESTA 4 (TT4); FUNCTIONS IN: naringenin-chalcone synthase activity; INVOLVED IN: in 11 processes; LOCATED IN: plant-type vacuole membrane, endoplasmic reticulum, nucleus; EXPRESSED IN: 22 plant structures; EXPRESSED DURING: 14 growth stages; CONTAINS InterPro DOMAIN/s: Chalcone/stilbene synthase, N-terminal (InterPro:IPR001099), Thiolase-like (InterPro:IPR016039), Polyketide synthase,…
AT5G21100	AT5G21100	Plant L-ascorbate oxidase [Source:NCBI gene (formerly Entrezgene);Acc:832234]	-1.11209	NS	NS	NS	-1.05799	-1.34641	-1.12598	NS	-1.17561	-1.03933	Plant L-ascorbate oxidase; FUNCTIONS IN: oxidoreductase activity, copper ion binding, L-ascorbate oxidase activity; INVOLVED IN: oxidation reduction; LOCATED IN: plant-type cell wall; EXPRESSED IN: 21 plant structures; EXPRESSED DURING: 13 growth stages; CONTAINS InterPro DOMAIN/s: Multicopper oxidase, type 3 (InterPro:IPR011707), Multicopper oxidase, type 2 (InterPro:IPR011706), Cupredoxin (Inte…
AT5G26030	FC1	ferrochelatase 1 [Source:NCBI gene (formerly Entrezgene);Acc:832672]	-0.77321	NS	NS	-0.731135	-0.528001	-0.661186	NS	NS	NS	NS	ferrochelatase 1 (FC1); FUNCTIONS IN: ferrochelatase activity; INVOLVED IN: response to oxidative stress, heme biosynthetic process, tetrapyrrole biosynthetic process; LOCATED IN: mitochondrion, chloroplast, plastid; EXPRESSED IN: 24 plant structures; EXPRESSED DURING: 14 growth stages; CONTAINS InterPro DOMAIN/s: Ferrochelatase, active site (InterPro:IPR019772), Ferrochelatase (InterPro:IPR00101…
AT5G37770	TCH2	EF hand calcium-binding protein family [Source:NCBI gene (formerly Entrezgene);Acc:833755]	-1.40354	NS	NS	NS	-1.05894	-0.991682	-0.813798	NS	NS	-0.542105	TOUCH 2 (TCH2); FUNCTIONS IN: calcium ion binding; INVOLVED IN: in 13 processes; LOCATED IN: plasma membrane, actin cytoskeleton; EXPRESSED IN: 34 plant structures; EXPRESSED DURING: 14 growth stages; CONTAINS InterPro DOMAIN/s: EF-Hand 1, calcium-binding site (InterPro:IPR018247), EF-HAND 2 (InterPro:IPR018249), EF-hand-like domain (InterPro:IPR011992), Calcium-binding EF-hand (InterPro:IPR00204…
AT5G40370	GRXC2	Glutaredoxin family protein [Source:NCBI gene (formerly Entrezgene);Acc:834035]	-0.472747	NS	NS	NS	-0.597194	-0.79653	NS	NS	-0.525704	NS	Glutaredoxin family protein; FUNCTIONS IN: electron carrier activity, arsenate reductase (glutaredoxin) activity, protein disulfide oxidoreductase activity; INVOLVED IN: cell redox homeostasis; LOCATED IN: plasma membrane, vacuole; EXPRESSED IN: 28 plant structures; EXPRESSED DURING: 15 growth stages; CONTAINS InterPro DOMAIN/s: Glutaredoxin (InterPro:IPR002109), Thioredoxin fold (InterPro:IPR012…
AT5G40390	SIP1	Raffinose synthase family protein [Source:NCBI gene (formerly Entrezgene);Acc:834037]	-0.647469	-0.895556	NS	-0.942115	-0.823294	-0.99784	-0.874661	NS	-1.50188	-1.26996	seed imbibition 1-like (SIP1); FUNCTIONS IN: hydrolase activity, hydrolyzing O-glycosyl compounds, galactinol-sucrose galactosyltransferase activity; INVOLVED IN: mannitol biosynthetic process, raffinose family oligosaccharide biosynthetic process, response to water deprivation, sucrose biosynthetic process; LOCATED IN: chloroplast; EXPRESSED IN: 22 plant structures; EXPRESSED DURING: 13 growth s…
AT5G42380	CML37	calmodulin like 37 [Source:NCBI gene (formerly Entrezgene);Acc:834244]	-1.79016	NS	NS	NS	NS	-1.53749	NS	NS	NS	NS	calmodulin like 37 (CML37); FUNCTIONS IN: calcium ion binding; INVOLVED IN: response to ozone; LOCATED IN: chloroplast; EXPRESSED IN: 12 plant structures; EXPRESSED DURING: 8 growth stages; CONTAINS InterPro DOMAIN/s: EF-Hand 1, calcium-binding site (InterPro:IPR018247), EF-HAND 2 (InterPro:IPR018249), EF-hand-like domain (InterPro:IPR011992), Calcium-binding EF-hand (InterPro:IPR002048), EF-hand…
AT5G47650	NUDT2	nudix hydrolase homolog 2 [Source:NCBI gene (formerly Entrezgene);Acc:834816]	-0.764615	NS	NS	NS	NS	-0.697864	NS	-0.836939	-0.837379	-0.800135	nudix hydrolase homolog 2 (NUDT2); FUNCTIONS IN: hydrolase activity, ADP-ribose diphosphatase activity, NAD or NADH binding; INVOLVED IN: response to oxidative stress; LOCATED IN: cytosol; EXPRESSED IN: 17 plant structures; EXPRESSED DURING: 12 growth stages; CONTAINS InterPro DOMAIN/s: NUDIX hydrolase domain-like (InterPro:IPR015797), Nudix hydrolase 6-like (InterPro:IPR003293), NUDIX hydrolase …
AT5G52310	LTI78	low-temperature-responsive protein 78 (LTI78) / desiccation-responsive protein 29A (RD29A) [Source:NCBI gene (formerly Entrezgene);Acc:835307]	-1.40775	NS	NS	NS	NS	-0.971845	NS	-1.86673	-2.61861	-1.25883	LOW-TEMPERATURE-INDUCED 78 (LTI78); FUNCTIONS IN: molecular_function unknown; INVOLVED IN: in 7 processes; LOCATED IN: cellular_component unknown; EXPRESSED IN: 24 plant structures; EXPRESSED DURING: 13 growth stages; BEST Arabidopsis thaliana protein match is: CAP160 protein (TAIR:AT5G52300.2); Has 4951 Blast hits to 3145 proteins in 397 species: Archae - 10; Bacteria - 1464; Metazoa - 1621; Fun…
AT5G58070	TIL	temperature-induced lipocalin [Source:NCBI gene (formerly Entrezgene);Acc:835919]	-0.984625	-0.590121	-0.551343	-0.701718	-0.532809	-0.828341	NS	NS	NS	NS	temperature-induced lipocalin (TIL); FUNCTIONS IN: binding, transporter activity; INVOLVED IN: transport, response to cold, response to light stimulus, response to heat; LOCATED IN: mitochondrion, endoplasmic reticulum, plasma membrane, vacuole; EXPRESSED IN: 26 plant structures; EXPRESSED DURING: 17 growth stages; CONTAINS InterPro DOMAIN/s: Lipocalin, bacterial (InterPro:IPR002446), Lipocalin, …
AT5G60890	MYB34	myb domain protein 34 [Source:NCBI gene (formerly Entrezgene);Acc:836210]	-0.279964	NS	NS	NS	NS	-0.764127	-1.53991	NS	-1.01847	-1.69816	myb domain protein 34 (MYB34); FUNCTIONS IN: DNA binding, transcription activator activity, kinase activity, sequence-specific DNA binding transcription factor activity; INVOLVED IN: tryptophan biosynthetic process, response to jasmonic acid stimulus, defense response to insect, cellular response to sulfur starvation, indole glucosinolate biosynthetic process; LOCATED IN: nucleus; EXPRESSED IN: 6…
AT5G64940	ATH13	ABC2 homolog 13 [Source:NCBI gene (formerly Entrezgene);Acc:836618]	-1.28322	-0.815891	-0.720355	-1.20107	-1.0662	-0.966537	-1.01014	-0.626561	-0.409096	-0.914366	ABC2 homolog 13 (ATH13); FUNCTIONS IN: transporter activity; INVOLVED IN: transport; LOCATED IN: chloroplast, chloroplast envelope; EXPRESSED IN: 22 plant structures; EXPRESSED DURING: 13 growth stages; CONTAINS InterPro DOMAIN/s: ABC-1 (InterPro:IPR004147), Protein kinase-like domain (InterPro:IPR011009); BEST Arabidopsis thaliana protein match is: Protein kinase superfamily protein (TAIR:AT3G07…
GO enrichment analysis
GO-BP
Enrichment FDR	nGenes	Biological Process (BP)	Pathway Genes	Fold Enrichment
2.5e-10	7	Response to hydrogen peroxide	73	75.7
4.1e-10	7	Cellular response to oxidative stress	82	67.4
9.9e-58	34	Response to oxidative stress	454	59.1
8.7e-17	12	Response to reactive oxygen species	161	58.8
7e-09	7	Cellular response to chemical stress	130	42.5
1.2e-08	7	Response to light intensity	143	38.6
1.7e-09	8	Cellular oxidant detoxification	176	35.9
3.1e-09	8	Cellular detoxification	194	32.6
3.1e-09	8	Cellular response to toxic substance	195	32.4
3.1e-09	9	Detoxification	299	23.8
7.6e-09	9	Response to toxic substance	340	20.9
1.3e-15	17	Response to inorganic substance	790	17
7e-09	11	Response to temperature stimulus	648	13.4
2.5e-10	13	Response to light stimulus	773	13.3
3.3e-10	13	Response to radiation	796	12.9
4.4e-14	20	Response to oxygen-containing compound	1679	9.4
4.3e-10	15	Cellular response to stress	1272	9.3
3e-13	21	Response to abiotic stimulus	2170	7.6
9.8e-19	28	Response to chemical	3091	7.2
5.7e-28	35	Response to stress	3953	7
GO-MF
Enrichment FDR	nGenes	Molecular Function (MF)	Pathway Genes	Fold Enrichment
0.00019	2	Phenylalanine ammonia-lyase activity	4	394.7
0.00033	2	Ammonia-lyase activity	6	263.1
0.018	1	Catalase activity	3	263.1
0.0005	2	Thioredoxin peroxidase activity	8	197.3
0.00089	2	Peroxiredoxin activity	11	143.5
0.0021	2	Glutathione binding	19	83.1
0.0021	2	Oligopeptide binding	19	83.1
0.0037	2	Modified amino acid binding	27	58.5
0.00033	3	Oxidoreductase activity acting on a sulfur group of donors disulfide	45	52.6
0.0059	2	Carbon-nitrogen lyase activity	35	45.1
1.8e-08	7	Peroxidase activity	136	40.6
0.0072	2	Sulfur compound binding	40	39.5
1.8e-08	7	Oxidoreductase activity acting on peroxide as acceptor	143	38.6
3.2e-09	8	Antioxidant activity	167	37.8
0.0082	2	Galactosyltransferase activity	44	35.9
0.015	2	Glutathione transferase activity	62	25.5
0.00033	4	Oxidoreductase activity acting on a sulfur group of donors	129	24.5
0.0021	3	Peptide binding	98	24.2
0.0033	3	Amide binding	118	20.1
8.4e-06	12	Oxidoreductase activity	1598	5.9
GO-CC
Enrichment FDR	nGenes	Cellular Component (CC)	Pathway Genes	Fold Enrichment
9e-06	4	Plastoglobule	62	50.9
1.5e-05	4	Thylakoid lumen	74	42.7
1.9e-07	10	Chloroplast envelope	701	11.3
0.0017	4	Chloroplast membrane	291	10.9
3.2e-07	10	Chloroplast stroma	767	10.3
3.2e-07	10	Plastid stroma	774	10.2
4.1e-08	12	Plastid envelope	995	9.5
0.00078	5	Chloroplast thylakoid membrane	423	9.3
0.00078	5	Plastid thylakoid membrane	425	9.3
1.2e-05	8	Plastid membrane	682	9.3
5.3e-05	7	Thylakoid	602	9.2
0.00021	6	Chloroplast thylakoid	520	9.1
0.00021	6	Plastid thylakoid	522	9.1
0.00087	5	Thylakoid membrane	445	8.9
0.00087	5	Photosynthetic membrane	446	8.8
1.6e-06	12	Organelle envelope	1515	6.3
1.6e-06	12	Envelope	1515	6.3
1.1e-10	21	Plastid	2910	5.7
3.1e-08	17	Chloroplast	2403	5.6
0.0001	13	Cytosol	2789	3.7
Transcription factor enrichment analysis
TF-AGRIS
Enrichment FDR	nGenes	Transcription Factor Binding Motif	Pathway Genes	Fold Enrichment
NS

## Sheet: Group II-OS
GO- and Transcription Factor- Enrichment analyses of group-IIOS genes			DEG Expcression log2 FC (FL/GC)
Gene Annotation			Root	adc1-R	OXPtADC-R	cdr7/cuao3-R	OXCuAO3-R	Shoot	adc1-S	OXPtADC-S	cdr7/cuao3-S	OXCuAO3-S	TF enrichment				Annotation
Gene ID	Symbol	Description	Col	adc1	OXPtADC	cdr7/cuao3	OXCuAO3	Col	adc1	OXPtADC	cdr7/cuao3	OXCuAO3	BZIP16	AT5G05790	ABF2	AT5G52660
AT1G02930	GSTF6	glutathione S-transferase 6 [Source:NCBI gene (formerly Entrezgene);Acc:839515]	0.698615	1.29141	NS	NS	NS	0.8601	0.947649	NS	NS	1.21045					glutathione S-transferase 6 (GSTF6); FUNCTIONS IN: glutathione transferase activity, copper ion binding, cobalt ion binding, glutathione binding; INVOLVED IN: in 7 processes; LOCATED IN: mitochondrion, cell wall, vacuole, cytoplasm; EXPRESSED IN: fruit, root, cultured cell, leaf; EXPRESSED DURING: seedling growth, seed development stages; CONTAINS InterPro DOMAIN/s: Thioredoxin fold (InterPro:IPR…
AT1G03850	GRXS13	Glutaredoxin family protein [Source:NCBI gene (formerly Entrezgene);Acc:839392]	0.666939	0.924474	NS	NS	NS	1.75342	1.79971	NS	1.52598	2.23377	v		v	v	Glutaredoxin family protein; FUNCTIONS IN: electron carrier activity, protein disulfide oxidoreductase activity; INVOLVED IN: response to cytokinin stimulus; EXPRESSED IN: 14 plant structures; EXPRESSED DURING: 9 growth stages; CONTAINS InterPro DOMAIN/s: Glutaredoxin-like, plant II (InterPro:IPR011905), Thioredoxin fold (InterPro:IPR012335), Glutaredoxin (InterPro:IPR002109), Thioredoxin-like fo…
AT1G14870	PCR2	PLANT CADMIUM RESISTANCE 2 [Source:NCBI gene (formerly Entrezgene);Acc:838052]	0.863636	1.01283	NS	NS	0.637589	1.39386	1.91488	NS	1.4424	2.14429					PLANT CADMIUM RESISTANCE 2 (PCR2); FUNCTIONS IN: molecular_function unknown; INVOLVED IN: response to oxidative stress; LOCATED IN: plasma membrane; EXPRESSED IN: callus; CONTAINS InterPro DOMAIN/s: Protein of unknown function Cys-rich (InterPro:IPR006461); BEST Arabidopsis thaliana protein match is: PLAC8 family protein (TAIR:AT5G35525.1); Has 803 Blast hits to 802 proteins in 112 species: Archa…
AT1G20620	CAT3	catalase 3 [Source:NCBI gene (formerly Entrezgene);Acc:838651]	0.355735	NS	0.67089	NS	NS	0.959539	0.902185	0.996133	0.605771	1.3722		v		v	catalase 3 (CAT3); FUNCTIONS IN: catalase activity, cobalt ion binding; INVOLVED IN: in 7 processes; LOCATED IN: in 11 components; EXPRESSED IN: 29 plant structures; EXPRESSED DURING: 17 growth stages; CONTAINS InterPro DOMAIN/s: Catalase-like domain, haem-dependent (InterPro:IPR020835), Catalase related subgroup (InterPro:IPR018028), Catalase (InterPro:IPR002226), Catalase, N-terminal (InterPro:…
AT1G32230	RCD1	WWE protein-protein interaction domain protein family [Source:NCBI gene (formerly Entrezgene);Acc:840115]	0.307765	NS	NS	NS	NS	0.666983	0.385394	NS	0.412318	0.426763					RADICAL-INDUCED CELL DEATH1 (RCD1); CONTAINS InterPro DOMAIN/s: WWE domain (InterPro:IPR004170), Poly(ADP-ribose) polymerase, catalytic domain (InterPro:IPR012317), RST domain of plant C-terminal (InterPro:IPR022003); BEST Arabidopsis thaliana protein match is: similar to RCD one 1 (TAIR:AT2G35510.1); Has 179 Blast hits to 178 proteins in 19 species: Archae - 0; Bacteria - 0; Metazoa - 7; Fungi -…
AT1G35580	CINV1	cytosolic invertase 1 [Source:NCBI gene (formerly Entrezgene);Acc:840454]	0.276299	NS	NS	NS	NS	1.13595	1.0003	NS	1.16442	0.756681		v		v	cytosolic invertase 1 (CINV1); FUNCTIONS IN: protein binding, beta-fructofuranosidase activity; INVOLVED IN: carbohydrate metabolic process, sucrose catabolic process, using invertase or sucrose synthase, root development, cellular amino acid metabolic process; LOCATED IN: cytosol, nucleus, plasma membrane, membrane; EXPRESSED IN: 21 plant structures; EXPRESSED DURING: 13 growth stages; CONTAINS …
AT1G52760	LysoPL2	lysophospholipase 2 [Source:NCBI gene (formerly Entrezgene);Acc:841709]	0.338804	NS	NS	NS	NS	0.473345	0.481624	NS	NS	NS		v			lysophospholipase 2 (LysoPL2); BEST Arabidopsis thaliana protein match is: alpha/beta-Hydrolases superfamily protein (TAIR:AT1G11090.1); Has 2373 Blast hits to 2373 proteins in 808 species: Archae - 32; Bacteria - 1418; Metazoa - 106; Fungi - 99; Plants - 433; Viruses - 39; Other Eukaryotes - 246 (source: NCBI BLink).
AT1G65970	TPX2	thioredoxin-dependent peroxidase 2 [Source:NCBI gene (formerly Entrezgene);Acc:842909]	0.943285	1.22482	1.19174	0.870474	0.894949	2.00524	1.45508	NS	1.89783	1.76246		v		v	thioredoxin-dependent peroxidase 2 (TPX2); FUNCTIONS IN: oxidoreductase activity, antioxidant activity; INVOLVED IN: cell redox homeostasis; LOCATED IN: cellular_component unknown; EXPRESSED IN: leaf; CONTAINS InterPro DOMAIN/s: Thioredoxin fold (InterPro:IPR012335), Thioredoxin-like (InterPro:IPR017936), Thioredoxin-like fold (InterPro:IPR012336), Redoxin (InterPro:IPR013740); BEST Arabidopsis t…
AT1G73260	KTI1	kunitz trypsin inhibitor 1 [Source:NCBI gene (formerly Entrezgene);Acc:843660]	1.51236	1.68088	1.05238	1.47739	1.53955	2.28778	1.86034	1.43152	2.12581	3.31791					kunitz trypsin inhibitor 1 (KTI1); FUNCTIONS IN: endopeptidase inhibitor activity; INVOLVED IN: response to salt stress, response to hydrogen peroxide, defense response to bacterium, programmed cell death, response to salicylic acid stimulus; LOCATED IN: mitochondrion; EXPRESSED IN: 8 plant structures; EXPRESSED DURING: LP.06 six leaves visible, LP.04 four leaves visible, 4 anthesis, petal differ…
AT1G77120	ADH1	alcohol dehydrogenase 1 [Source:NCBI gene (formerly Entrezgene);Acc:844047]	0.532095	NS	NS	NS	NS	2.11262	1.52109	1.65078	NS	1.09798	v	v	v	v	alcohol dehydrogenase 1 (ADH1); FUNCTIONS IN: alcohol dehydrogenase (NAD) activity; INVOLVED IN: response to cadmium ion, cellular respiration, response to salt stress, response to hypoxia, response to osmotic stress; LOCATED IN: cytosol, plasma membrane; EXPRESSED IN: 24 plant structures; EXPRESSED DURING: 12 growth stages; CONTAINS InterPro DOMAIN/s: GroES-like (InterPro:IPR011032), Alcohol deh…
AT3G10985	SAG20	senescence associated 20 [Source:NCBI gene (formerly Entrezgene);Acc:2745879]	0.37248	0.604671	NS	0.605074	0.591758	1.76292	1.68609	1.16574	1.93776	1.77672	v		v	v	senescence associated gene 20 (SAG20); CONTAINS InterPro DOMAIN/s: Wound-induced protein, Wun1, subgroup (InterPro:IPR016533), Wound-induced protein, Wun1 (InterPro:IPR009798); BEST Arabidopsis thaliana protein match is: Nuclear transport factor 2 (NTF2) family protein (TAIR:AT5G01740.1); Has 35333 Blast hits to 34131 proteins in 2444 species: Archae - 798; Bacteria - 22429; Metazoa - 974; Fungi …
AT3G20340	AT3G20340	protein expression protein [Source:NCBI gene (formerly Entrezgene);Acc:821578]	0.719187	NS	NS	NS	0.723117	2.36617	2.38474	NS	2.00348	2.61282	v		v		FUNCTIONS IN: molecular_function unknown; INVOLVED IN: response to oxidative stress, N-terminal protein myristoylation; LOCATED IN: cellular_component unknown; EXPRESSED IN: 9 plant structures; EXPRESSED DURING: 4 anthesis, petal differentiation and expansion stage; Has 40 Blast hits to 40 proteins in 9 species: Archae - 0; Bacteria - 0; Metazoa - 0; Fungi - 0; Plants - 40; Viruses - 0; Other Euk…
AT3G48360	BT2	BTB and TAZ domain protein 2 [Source:NCBI gene (formerly Entrezgene);Acc:823994]	0.439618	1.49211	NS	0.492517	NS	1.92996	2.37089	2.18259	2.0805	2.52786	v	v	v		BTB and TAZ domain protein 2 (BT2); CONTAINS InterPro DOMAIN/s: BTB/POZ (InterPro:IPR013069), Zinc finger, TAZ-type (InterPro:IPR000197), BTB/POZ fold (InterPro:IPR011333), Kelch related (InterPro:IPR013089), BTB/POZ-like (InterPro:IPR000210); BEST Arabidopsis thaliana protein match is: BTB and TAZ domain protein 1 (TAIR:AT5G63160.1); Has 1199 Blast hits to 1199 proteins in 89 species: Archae - 0…
AT3G57520	SIP2	seed imbibition 2 [Source:NCBI gene (formerly Entrezgene);Acc:824919]	0.380727	NS	NS	NS	NS	1.50706	1.60611	1.07351	1.17578	1.49014	v	v	v		seed imbibition 2 (SIP2); CONTAINS InterPro DOMAIN/s: Glycoside hydrolase, catalytic core (InterPro:IPR017853), Raffinose synthase (InterPro:IPR008811); BEST Arabidopsis thaliana protein match is: seed imbibition 1 (TAIR:AT1G55740.1); Has 528 Blast hits to 504 proteins in 147 species: Archae - 29; Bacteria - 95; Metazoa - 0; Fungi - 82; Plants - 312; Viruses - 0; Other Eukaryotes - 10 (source: NC…
AT4G08770	Prx37	Peroxidase superfamily protein [Source:NCBI gene (formerly Entrezgene);Acc:826447]	0.354152	NS	NS	NS	0.550603	1.68692	0.894964	NS	NS	1.40168				v	Peroxidase superfamily protein; FUNCTIONS IN: peroxidase activity, heme binding; INVOLVED IN: response to oxidative stress, oxidation reduction; LOCATED IN: vacuole; EXPRESSED IN: hypocotyl, root; CONTAINS InterPro DOMAIN/s: Haem peroxidase (InterPro:IPR010255), Plant peroxidase (InterPro:IPR000823), Peroxidases heam-ligand binding site (InterPro:IPR019793), Haem peroxidase, plant/fungal/bacteria…
AT4G11850	PLDGAMMA1	phospholipase D gamma 1 [Source:NCBI gene (formerly Entrezgene);Acc:826791]	0.29842	NS	NS	NS	NS	0.550036	0.763126	NS	0.593036	1.13249		v			phospholipase D gamma 1 (PLDGAMMA1); FUNCTIONS IN: phospholipase D activity, protein binding, phosphatidylinositol-4,5-bisphosphate binding; INVOLVED IN: defense response to bacterium, incompatible interaction, embryo development ending in seed dormancy; LOCATED IN: plasma membrane; EXPRESSED IN: 20 plant structures; EXPRESSED DURING: 12 growth stages; CONTAINS InterPro DOMAIN/s: C2 membrane targ…
AT4G12570	UPL5	ubiquitin protein ligase 5 [Source:NCBI gene (formerly Entrezgene);Acc:826870]	0.332079	NS	NS	NS	NS	1.19514	0.981808	0.68836	1.11086	1.17949		v			ubiquitin protein ligase 5 (UPL5); CONTAINS InterPro DOMAIN/s: Ubiquitin subgroup (InterPro:IPR019956), Ubiquitin (InterPro:IPR000626), Ubiquitin supergroup (InterPro:IPR019955), HECT (InterPro:IPR000569); BEST Arabidopsis thaliana protein match is: ubiquitin-protein ligase 1 (TAIR:AT1G55860.1); Has 13201 Blast hits to 8328 proteins in 676 species: Archae - 0; Bacteria - 15; Metazoa - 6234; Fungi…
AT4G21830	MSRB7	methionine sulfoxide reductase B7 [Source:NCBI gene (formerly Entrezgene);Acc:828271]	1.51007	1.22719	1.18371	NS	1.13424	2.56499	1.55233	NS	NS	NS				v	methionine sulfoxide reductase B7 (MSRB7); CONTAINS InterPro DOMAIN/s: Methionine sulphoxide reductase B (InterPro:IPR002579), Mss4-like (InterPro:IPR011057); BEST Arabidopsis thaliana protein match is: methionine sulfoxide reductase B8 (TAIR:AT4G21840.1); Has 30201 Blast hits to 17322 proteins in 780 species: Archae - 12; Bacteria - 1396; Metazoa - 17338; Fungi - 3422; Plants - 5037; Viruses - 0…
AT4G30170	AT4G30170	Peroxidase family protein [Source:NCBI gene (formerly Entrezgene);Acc:829140]	0.416206	NS	0.713671	NS	NS	1.25209	0.892533	NS	NS	1.20631		v			Peroxidase family protein; FUNCTIONS IN: peroxidase activity, heme binding; INVOLVED IN: oxidation reduction, response to oxidative stress; LOCATED IN: endomembrane system; EXPRESSED IN: hypocotyl, root; CONTAINS InterPro DOMAIN/s: Haem peroxidase (InterPro:IPR010255), Plant peroxidase (InterPro:IPR000823), Peroxidases heam-ligand binding site (InterPro:IPR019793), Haem peroxidase, plant/fungal/b…
AT4G35770	SEN1	Rhodanese/Cell cycle control phosphatase superfamily protein [Source:NCBI gene (formerly Entrezgene);Acc:829730]	1.42526	3.1708	1.38083	1.65228	1.83345	4.67678	3.87745	4.3551	4.67678	4.67366		v			SENESCENCE 1 (SEN1); FUNCTIONS IN: molecular_function unknown; INVOLVED IN: in 6 processes; LOCATED IN: chloroplast; EXPRESSED IN: 22 plant structures; EXPRESSED DURING: 13 growth stages; CONTAINS InterPro DOMAIN/s: Rhodanese-like (InterPro:IPR001763); BEST Arabidopsis thaliana protein match is: sulfurtransferase protein 16 (TAIR:AT5G66040.1); Has 1680 Blast hits to 1680 proteins in 570 species: …
AT4G37520	AT4G37520	Peroxidase superfamily protein [Source:NCBI gene (formerly Entrezgene);Acc:829907]	1.02766	1.1185	NS	1.24936	1.10152	1.89277	1.28514	1.46161	2.00916	1.48803					Peroxidase superfamily protein; FUNCTIONS IN: protein binding, peroxidase activity; INVOLVED IN: oxidation reduction, response to oxidative stress; LOCATED IN: cytoplasm; CONTAINS InterPro DOMAIN/s: Haem peroxidase (InterPro:IPR010255), Plant peroxidase (InterPro:IPR000823), Peroxidases heam-ligand binding site (InterPro:IPR019793), Haem peroxidase, plant/fungal/bacterial (InterPro:IPR002016); BE…
AT5G20250	DIN10	Raffinose synthase family protein [Source:NCBI gene (formerly Entrezgene);Acc:832147]	1.03793	1.38701	NS	1.41241	1.26544	2.56603	2.64209	2.38971	2.81222	2.74494	v		v	v	DARK INDUCIBLE 10 (DIN10); FUNCTIONS IN: hydrolase activity, hydrolyzing O-glycosyl compounds; INVOLVED IN: response to karrikin, aging, response to light stimulus, response to cold, response to sucrose stimulus; LOCATED IN: chloroplast; EXPRESSED IN: 25 plant structures; EXPRESSED DURING: 14 growth stages; CONTAINS InterPro DOMAIN/s: Glycoside hydrolase, catalytic core (InterPro:IPR017853), Raff…
AT5G27600	LACS7	long-chain acyl-CoA synthetase 7 [Source:NCBI gene (formerly Entrezgene);Acc:832820]	0.475225	0.5746	NS	NS	0.464364	0.715902	0.851645	0.842304	0.749945	0.881068					long-chain acyl-CoA synthetase 7 (LACS7); FUNCTIONS IN: protein binding, long-chain fatty acid-CoA ligase activity; INVOLVED IN: response to salt stress, long-chain fatty acid metabolic process, response to ozone; LOCATED IN: peroxisome; EXPRESSED IN: 25 plant structures; EXPRESSED DURING: 15 growth stages; CONTAINS InterPro DOMAIN/s: AMP-binding, conserved site (InterPro:IPR020845), AMP-dependen…
AT5G44380	AT5G44380	FAD-binding Berberine family protein [Source:NCBI gene (formerly Entrezgene);Acc:834464]	0.699952	0.691074	NS	NS	0.722032	1.53516	0.883431	NS	NS	1.21005		v		v	FAD-binding Berberine family protein; FUNCTIONS IN: electron carrier activity, oxidoreductase activity, FAD binding, catalytic activity; INVOLVED IN: response to oxidative stress; LOCATED IN: cell wall; EXPRESSED IN: shoot apex, hypocotyl, sepal, root, stamen; EXPRESSED DURING: 4 anthesis; CONTAINS InterPro DOMAIN/s: FAD-linked oxidase, FAD-binding, subdomain 2 (InterPro:IPR016168), FAD-binding, …
AT5G56550	OXS3	oxidative stress 3 [Source:NCBI gene (formerly Entrezgene);Acc:835756]	1.77725	1.8332	NS	1.53686	2.36253	1.77432	2.14623	NS	1.92172	2.39279		v			OXIDATIVE STRESS 3 (OXS3); BEST Arabidopsis thaliana protein match is: unknown protein (TAIR:AT4G26288.1); Has 1807 Blast hits to 1807 proteins in 277 species: Archae - 0; Bacteria - 0; Metazoa - 736; Fungi - 347; Plants - 385; Viruses - 0; Other Eukaryotes - 339 (source: NCBI BLink).
AT5G63160	BT1	BTB and TAZ domain protein 1 [Source:NCBI gene (formerly Entrezgene);Acc:836437]	1.27356	1.71989	1.40643	1.35026	1.6579	2.02481	2.19256	1.84267	2.21361	2.29022			v	v	BTB and TAZ domain protein 1 (BT1); CONTAINS InterPro DOMAIN/s: BTB/POZ (InterPro:IPR013069), Zinc finger, TAZ-type (InterPro:IPR000197), BTB/POZ fold (InterPro:IPR011333), Kelch related (InterPro:IPR013089), BTB/POZ-like (InterPro:IPR000210); BEST Arabidopsis thaliana protein match is: BTB and TAZ domain protein 2 (TAIR:AT3G48360.1); Has 1462 Blast hits to 1460 proteins in 105 species: Archae - …
AT5G64100	AT5G64100	Peroxidase superfamily protein [Source:NCBI gene (formerly Entrezgene);Acc:836531]	0.492418	NS	NS	NS	NS	1.44258	NS	NS	NS	NS					Peroxidase superfamily protein; FUNCTIONS IN: peroxidase activity, heme binding; INVOLVED IN: oxidation reduction, response to oxidative stress; LOCATED IN: cell wall; EXPRESSED IN: hypocotyl, root, callus; EXPRESSED DURING: seedling growth; CONTAINS InterPro DOMAIN/s: Haem peroxidase (InterPro:IPR010255), Plant peroxidase (InterPro:IPR000823), Peroxidases heam-ligand binding site (InterPro:IPR01…
AT4G21870	AT4G21870	HSP20-like chaperones superfamily protein [Source:NCBI gene (formerly Entrezgene);Acc:828276]	1.58183	NS	2.24256	NS	NS	0.767609	NS	0.964339	1.28151	0.920652					HSP20-like chaperones superfamily protein; CONTAINS InterPro DOMAIN/s: Heat shock protein Hsp20 (InterPro:IPR002068), HSP20-like chaperone (InterPro:IPR008978); BEST Arabidopsis thaliana protein match is: HSP20-like chaperones superfamily protein (TAIR:AT1G53540.1); Has 2331 Blast hits to 2331 proteins in 523 species: Archae - 47; Bacteria - 802; Metazoa - 2; Fungi - 44; Plants - 1239; Viruses - …
AT5G64120	AT5G64120	Peroxidase superfamily protein [Source:NCBI gene (formerly Entrezgene);Acc:836533]	0.344278	0.745967	NS	NS	0.674333	0.853009	1.16053	0.881027	NS	1.11289				v	Peroxidase superfamily protein; FUNCTIONS IN: peroxidase activity; INVOLVED IN: defense response to fungus, N-terminal protein myristoylation, respiratory burst; LOCATED IN: apoplast, cell wall, membrane; EXPRESSED IN: 17 plant structures; EXPRESSED DURING: 10 growth stages; CONTAINS InterPro DOMAIN/s: Haem peroxidase (InterPro:IPR010255), Plant peroxidase (InterPro:IPR000823), Peroxidases heam-l…
GO enrichment analysis
GO-BP
Enrichment FDR	nGenes	Biological Process (BP)	Pathway Genes	Fold Enrichment
2.2e-15	9	Response to hydrogen peroxide	73	117.5
0.00011	3	Response to ozone	33	86.6
4.2e-20	13	Response to reactive oxygen species	161	76.9
4.1e-10	7	Hydrogen peroxide catabolic proc.	99	67.4
2.7e-50	29	Response to oxidative stress	454	60.9
1.1e-09	7	Hydrogen peroxide metabolic proc.	122	54.7
6.7e-10	8	Cellular detoxification	194	39.3
0.0011	3	Response to cadmium ion	73	39.2
6.7e-10	8	Cellular response to toxic substance	195	39.1
7.2e-10	8	Reactive oxygen species metabolic proc.	199	38.3
1.3e-08	7	Cellular oxidant detoxification	176	37.9
6.1e-10	9	Detoxification	299	28.7
1.2e-09	9	Response to toxic substance	340	25.2
6e-16	16	Response to inorganic substance	790	19.3
5.4e-11	16	Response to oxygen-containing compound	1679	9.1
2.7e-07	12	Cellular catabolic proc.	1478	7.7
2.1e-18	25	Response to chemical	3091	7.7
5.4e-23	29	Response to stress	3953	7
4.1e-07	13	Catabolic proc.	1911	6.5
1.9e-05	11	Cellular response to chemical stimulus	1791	5.9
GO-MF
Enrichment FDR	nGenes	Molecular Function (MF)	Pathway Genes	Fold Enrichment
0.00019	2	Galactinol-sucrose galactosyltransferase activity	5	381.1
0.028	1	Catalase activity	3	317.6
0.028	1	Decanoate-CoA ligase activity	3	317.6
0.041	1	Alpha-galactosidase activity	5	190.5
0.041	1	Raffinose alpha-galactosidase activity	5	190.5
0.047	1	Thioredoxin peroxidase activity	8	119.1
0.047	1	NAD+ ADP-ribosyltransferase activity	9	105.9
0.047	1	Alcohol dehydrogenase activity zinc-dependent	9	105.9
7.7e-09	7	Peroxidase activity	136	49
7.7e-09	7	Oxidoreductase activity acting on peroxide as acceptor	143	46.6
0.012	2	Galactosyltransferase activity	44	43.3
0.013	2	Cobalt ion binding	47	40.5
1.5e-08	7	Antioxidant activity	167	39.9
0.019	2	Phospholipase activity	60	31.8
6.4e-05	6	Heme binding	385	14.8
0.047	2	Lipase activity	129	14.8
9e-05	6	Tetrapyrrole binding	421	13.6
9.7e-06	11	Oxidoreductase activity	1598	6.6
0.00072	13	Metal ion binding	3803	3.3
0.00072	13	Cation binding	3824	3.2
GO-CC
Enrichment FDR	nGenes	Cellular Component (CC)	Pathway Genes	Fold Enrichment
0.04	1	Nuclear matrix	9	105.9
0.004	4	Plant-type cell wall	386	9.9
0.0049	4	Cell wall	421	9.1
0.0056	4	External encapsulating structure	450	8.5
0.0003	7	Cell-cell junction	897	7.4
0.0003	7	Plasmodesma	897	7.4
0.0003	7	Anchoring junction	897	7.4
0.0003	7	Symplast	898	7.4
0.0003	7	Cell junction	900	7.4
0.0014	7	Vacuole	1188	5.6
0.0035	8	Extracellular region	1876	4.1
Transcription factor enrichment analysis					TF Expression Log2 FC (FL/GC)
TF-AGRIS						Root					Shoot
Enrichment FDR	nGenes	Transcription Factor Binding Motif	Pathway Genes	Fold Enrichment		Col	adc1	OXPtADC	cdr7/cuao3	OXCuAO3	Col	adc1	OXPtADC	cdr7/cuao3	OXCuAO3
0.043	7	BZIP16 target	1631	4.1	AT2G35530	NS	NS	NS	NS	NS	NS	NS	NS	NS	NS
0.0014	13	AT5G05790 target	3277	3.8	AT5G05790	NS	NS	NS	NS	NS	NS	NS	NS	NS	NS
0.043	8	ABF2 target	2112	3.6	AT1G45249	-0.34824	NS	NS	NS	NS	NS	-0.656886	NS	NS	-0.499802
0.004	12	AT5G52660 target	3280	3.5	AT5G52660	NS	NS	NS	NS	NS	NS	NS	NS	NS	NS

## Sheet: Group III-OS
GO- and Transcription Factor- Enrichment analyses of group-IIIOS genes			DEG Expcression log2 FC (FL/GC)										TF enrichment
Gene Annotation			Root	adc1-R	OXPtADC-R	cdr7/cuao3-R	OXCuAO3-R	Shoot	adc1-S	OXPtADC-S	cdr7/cuao3-S	OXCuAO3-S		Annotation
Gene ID	Symbol	Description	Col	adc1	OXPtADC	cdr7/cuao3	OXCuAO3	Col	adc1	OXPtADC	cdr7/cuao3	OXCuAO3	BZIP50
AT1G19570	DHAR1	dehydroascorbate reductase [Source:NCBI gene (formerly Entrezgene);Acc:838544]	-0.668413	-0.647852	NS	NS	-0.592043	NS	NS	NS	NS	NS		dehydroascorbate reductase (DHAR1); FUNCTIONS IN: copper ion binding, glutathione dehydrogenase (ascorbate) activity; INVOLVED IN: in 6 processes; LOCATED IN: in 7 components; EXPRESSED IN: 7 plant structures; EXPRESSED DURING: seedling growth; CONTAINS InterPro DOMAIN/s: Thioredoxin fold (InterPro:IPR012335), Glutathione S-transferase, C-terminal (InterPro:IPR004046), Glutathione S-transferase, …
AT1G35910	TPPD	Haloacid dehalogenase-like hydrolase (HAD) superfamily protein [Source:NCBI gene (formerly Entrezgene);Acc:840493]	-0.793525	NS	-1.13844	NS	NS	NS	NS	NS	NS	NS	v	Haloacid dehalogenase-like hydrolase (HAD) superfamily protein; FUNCTIONS IN: catalytic activity, trehalose-phosphatase activity; INVOLVED IN: trehalose biosynthetic process, metabolic process; EXPRESSED IN: 14 plant structures; EXPRESSED DURING: 4 anthesis, C globular stage, F mature embryo stage, petal differentiation and expansion stage, E expanded cotyledon stage; CONTAINS InterPro DOMAIN/s: …
AT1G44970	AT1G44970	Peroxidase superfamily protein [Source:NCBI gene (formerly Entrezgene);Acc:841062]	-0.562692	NS	NS	NS	NS	NS	NS	NS	NS	NS		Peroxidase superfamily protein; FUNCTIONS IN: peroxidase activity, heme binding; INVOLVED IN: response to oxidative stress, oxidation reduction; LOCATED IN: endomembrane system; EXPRESSED IN: 17 plant structures; EXPRESSED DURING: 7 growth stages; CONTAINS InterPro DOMAIN/s: Haem peroxidase (InterPro:IPR010255), Plant peroxidase (InterPro:IPR000823), Peroxidases heam-ligand binding site (InterPro…
AT1G45145	TRX5	thioredoxin H-type 5 [Source:NCBI gene (formerly Entrezgene);Acc:841082]	-0.736741	NS	-1.08878	NS	NS	NS	0.752566	NS	NS	1.3631		thioredoxin H-type 5 (TRX5); FUNCTIONS IN: oxidoreductase activity, acting on sulfur group of donors, disulfide as acceptor; INVOLVED IN: response to oxidative stress, response to cadmium ion, defense response to fungus, response to microbial phytotoxin; LOCATED IN: cytosol, plasma membrane; EXPRESSED IN: 25 plant structures; EXPRESSED DURING: 15 growth stages; CONTAINS InterPro DOMAIN/s: Thiored…
AT1G68850	AT1G68850	Peroxidase superfamily protein [Source:NCBI gene (formerly Entrezgene);Acc:843218]	-0.417972	NS	NS	NS	NS	NS	NS	NS	NS	NS	v	Peroxidase superfamily protein; FUNCTIONS IN: peroxidase activity, heme binding; INVOLVED IN: oxidation reduction, response to oxidative stress; LOCATED IN: endomembrane system; EXPRESSED IN: hypocotyl, root; CONTAINS InterPro DOMAIN/s: Haem peroxidase (InterPro:IPR010255), Plant peroxidase (InterPro:IPR000823), Peroxidases heam-ligand binding site (InterPro:IPR019793), Haem peroxidase, plant/fun…
AT2G18150	AT2G18150	Peroxidase superfamily protein [Source:NCBI gene (formerly Entrezgene);Acc:816328]	-1.47465	-1.21119	NS	-1.11366	-1.21226	NS	-1.57129	-1.43377	-0.813428	-1.67769		Peroxidase superfamily protein; FUNCTIONS IN: peroxidase activity, heme binding; INVOLVED IN: response to oxidative stress, oxidation reduction, response to nematode; LOCATED IN: cell wall; CONTAINS InterPro DOMAIN/s: Haem peroxidase (InterPro:IPR010255), Plant peroxidase (InterPro:IPR000823), Peroxidases heam-ligand binding site (InterPro:IPR019793), Haem peroxidase, plant/fungal/bacterial (Inte…
AT2G18980	AT2G18980	Peroxidase superfamily protein [Source:NCBI gene (formerly Entrezgene);Acc:816415]	-0.575082	-0.69775	-0.655583	NS	-1.03928	NS	NS	NS	NS	NS		Peroxidase superfamily protein; FUNCTIONS IN: peroxidase activity, heme binding; INVOLVED IN: oxidation reduction, response to oxidative stress; LOCATED IN: endomembrane system; EXPRESSED IN: 6 plant structures; EXPRESSED DURING: LP.04 four leaves visible, petal differentiation and expansion stage; CONTAINS InterPro DOMAIN/s: Haem peroxidase (InterPro:IPR010255), Plant peroxidase (InterPro:IPR000…
AT2G38380	AT2G38380	Peroxidase superfamily protein [Source:NCBI gene (formerly Entrezgene);Acc:818419]	-0.547125	NS	NS	NS	NS	NS	-0.743831	NS	NS	NS	v	Peroxidase superfamily protein; FUNCTIONS IN: peroxidase activity, heme binding; INVOLVED IN: response to zinc ion, response to salt stress; LOCATED IN: plant-type cell wall; EXPRESSED IN: stem, root; CONTAINS InterPro DOMAIN/s: Haem peroxidase (InterPro:IPR010255), Plant peroxidase (InterPro:IPR000823), Peroxidases heam-ligand binding site (InterPro:IPR019793), Peroxidase, active site (InterPro:…
AT2G38390	AT2G38390	Peroxidase superfamily protein [Source:NCBI gene (formerly Entrezgene);Acc:818420]	-0.914759	-0.915206	-0.525975	NS	NS	NS	-1.19973	NS	NS	-1.29139	v	Peroxidase superfamily protein; FUNCTIONS IN: peroxidase activity, heme binding; INVOLVED IN: response to salt stress; LOCATED IN: endomembrane system; EXPRESSED IN: root; CONTAINS InterPro DOMAIN/s: Haem peroxidase (InterPro:IPR010255), Plant peroxidase (InterPro:IPR000823), Peroxidases heam-ligand binding site (InterPro:IPR019793), Peroxidase, active site (InterPro:IPR019794), Haem peroxidase, …
AT2G39800	P5CS1	delta1-pyrroline-5-carboxylate synthase 1 [Source:NCBI gene (formerly Entrezgene);Acc:818566]	-0.608471	NS	NS	NS	NS	NS	NS	NS	NS	NS	v	delta1-pyrroline-5-carboxylate synthase 1 (P5CS1); FUNCTIONS IN: delta1-pyrroline-5-carboxylate synthetase activity; INVOLVED IN: in 9 processes; LOCATED IN: chloroplast, membrane, cytoplasm; EXPRESSED IN: 6 plant structures; EXPRESSED DURING: C globular stage, D bilateral stage, E expanded cotyledon stage; CONTAINS InterPro DOMAIN/s: Glutamate 5-kinase (InterPro:IPR001057), Aspartate/glutamate/u…
AT2G40000	HSPRO2	ortholog of sugar beet HS1 PRO-1 2 [Source:NCBI gene (formerly Entrezgene);Acc:818588]	-0.906802	NS	NS	NS	NS	NS	0.77457	NS	NS	1.16558		ortholog of sugar beet HS1 PRO-1 2 (HSPRO2); CONTAINS InterPro DOMAIN/s: Hs1pro-1, C-terminal (InterPro:IPR009743), Hs1pro-1, N-terminal (InterPro:IPR009869); BEST Arabidopsis thaliana protein match is: Hs1pro-1 protein (TAIR:AT3G55840.1); Has 71 Blast hits to 71 proteins in 18 species: Archae - 0; Bacteria - 0; Metazoa - 0; Fungi - 0; Plants - 60; Viruses - 0; Other Eukaryotes - 11 (source: NCBI…
AT2G47180	GolS1	galactinol synthase 1 [Source:NCBI gene (formerly Entrezgene);Acc:819331]	-1.5791	-0.816106	NS	-1.42938	-1.25446	NS	NS	NS	NS	NS	v	galactinol synthase 1 (GolS1); FUNCTIONS IN: transferase activity, transferring hexosyl groups, transferase activity, transferring glycosyl groups; INVOLVED IN: response to high light intensity, carbohydrate biosynthetic process, response to hydrogen peroxide, response to heat; LOCATED IN: cellular_component unknown; EXPRESSED IN: 19 plant structures; EXPRESSED DURING: 11 growth stages; CONTAINS …
AT3G02840	AT3G02840	ARM repeat superfamily protein [Source:NCBI gene (formerly Entrezgene);Acc:821225]	-2.28647	NS	NS	NS	NS	NS	NS	NS	NS	1.30971	v	ARM repeat superfamily protein; FUNCTIONS IN: binding; INVOLVED IN: response to other organism, response to ozone; EXPRESSED IN: 16 plant structures; EXPRESSED DURING: 8 growth stages; CONTAINS InterPro DOMAIN/s: Armadillo-like helical (InterPro:IPR011989), Armadillo-type fold (InterPro:IPR016024); BEST Arabidopsis thaliana protein match is: ARM repeat superfamily protein (TAIR:AT5G37490.1); Has …
AT3G10930	AT3G10930		-0.726074	NS	NS	NS	NS	NS	0.88471	NS	NS	1.34599		unknown protein; FUNCTIONS IN: molecular_function unknown; INVOLVED IN: biological_process unknown; LOCATED IN: mitochondrion; EXPRESSED IN: 18 plant structures; EXPRESSED DURING: 9 growth stages; Has 1 Blast hits to 1 proteins in 1 species: Archae - 0; Bacteria - 0; Metazoa - 0; Fungi - 0; Plants - 1; Viruses - 0; Other Eukaryotes - 0 (source: NCBI BLink).
AT3G25250	AGC2-1	AGC (cAMP-dependent, cGMP-dependent and protein kinase C) kinase family protein [Source:NCBI gene (formerly Entrezgene);Acc:822119]	-0.86217	NS	NS	NS	NS	NS	NS	NS	NS	NS	v	AGC2-1; FUNCTIONS IN: kinase activity; INVOLVED IN: protein amino acid phosphorylation; LOCATED IN: cellular_component unknown; EXPRESSED IN: hypocotyl, root, stamen, pollen tube; EXPRESSED DURING: 4 anthesis, petal differentiation and expansion stage; CONTAINS InterPro DOMAIN/s: Protein kinase, catalytic domain (InterPro:IPR000719), Serine/threonine-protein kinase domain (InterPro:IPR002290), Se…
AT4G08780	AT4G08780	Peroxidase superfamily protein [Source:NCBI gene (formerly Entrezgene);Acc:826448]	-0.619125	NS	NS	NS	NS	NS	NS	NS	NS	NS		Peroxidase superfamily protein; FUNCTIONS IN: peroxidase activity, heme binding; INVOLVED IN: oxidation reduction, response to oxidative stress; LOCATED IN: vacuole; EXPRESSED IN: embryo, hypocotyl, root, flower, seed; EXPRESSED DURING: F mature embryo stage, petal differentiation and expansion stage, E expanded cotyledon stage, D bilateral stage; CONTAINS InterPro DOMAIN/s: Haem peroxidase (Inte…
AT4G11280	ACS6	1-aminocyclopropane-1-carboxylic acid (acc) synthase 6 [Source:NCBI gene (formerly Entrezgene);Acc:826730]	-1.65859	NS	NS	NS	-0.627488	NS	NS	NS	NS	-0.521873		1-aminocyclopropane-1-carboxylic acid (acc) synthase 6 (ACS6); CONTAINS InterPro DOMAIN/s: 1-aminocyclopropane-1-carboxylate synthase (InterPro:IPR001176), Aminotransferase, class I/classII (InterPro:IPR004839), Pyridoxal phosphate-dependent transferase, major domain (InterPro:IPR015424), Aminotransferases, class-I, pyridoxal-phosphate-binding site (InterPro:IPR004838), Pyridoxal phosphate-depend…
AT4G12720	NUDT7	MutT/nudix family protein [Source:NCBI gene (formerly Entrezgene);Acc:826884]	-0.752344	NS	NS	NS	NS	NS	NS	NS	NS	NS		NUDT7; FUNCTIONS IN: in 6 functions; INVOLVED IN: in 8 processes; LOCATED IN: cytosol; EXPRESSED IN: 23 plant structures; EXPRESSED DURING: 14 growth stages; CONTAINS InterPro DOMAIN/s: NUDIX hydrolase domain-like (InterPro:IPR015797), NUDIX hydrolase, conserved site (InterPro:IPR020084), Nudix hydrolase 6-like (InterPro:IPR003293), NUDIX hydrolase domain (InterPro:IPR000086); BEST Arabidopsis th…
AT4G17490	ERF6	ethylene responsive element binding factor 6 [Source:NCBI gene (formerly Entrezgene);Acc:827463]	-0.502186	NS	NS	NS	NS	NS	0.84802	NS	NS	1.01029	v	ethylene responsive element binding factor 6 (ERF6); CONTAINS InterPro DOMAIN/s: DNA-binding, integrase-type (InterPro:IPR016177), Pathogenesis-related transcriptional factor/ERF, DNA-binding (InterPro:IPR001471); BEST Arabidopsis thaliana protein match is: ethylene responsive element binding factor 5 (TAIR:AT5G47230.1); Has 30201 Blast hits to 17322 proteins in 780 species: Archae - 12; Bacteria…
AT4G20830	AT4G20830	FAD-binding Berberine family protein [Source:NCBI gene (formerly Entrezgene);Acc:827831]	-1.07816	NS	NS	NS	NS	NS	NS	NS	NS	NS	v	FAD-binding Berberine family protein; FUNCTIONS IN: electron carrier activity, oxidoreductase activity, FAD binding, catalytic activity; INVOLVED IN: response to oxidative stress; LOCATED IN: mitochondrion, apoplast, plasma membrane, vacuole, plant-type cell wall; EXPRESSED IN: 26 plant structures; EXPRESSED DURING: 14 growth stages; CONTAINS InterPro DOMAIN/s: FAD-binding, type 2 (InterPro:IPR01…
AT4G34710	ADC2	arginine decarboxylase 2 [Source:NCBI gene (formerly Entrezgene);Acc:829623]	-0.501972	NS	NS	-0.461606	NS	NS	NS	NS	NS	NS		arginine decarboxylase 2 (ADC2); CONTAINS InterPro DOMAIN/s: Orn/DAP/Arg decarboxylase 2, C-terminal (InterPro:IPR022643), Orn/DAP/Arg decarboxylase 2, conserved site (InterPro:IPR022657), Orn/DAP/Arg decarboxylase 2, pyridoxal-phosphate binding site (InterPro:IPR022653), Ornithine/DAP/Arg decarboxylase (InterPro:IPR000183), Arginine decarboxylase (InterPro:IPR002985), Orn/DAP/Arg decarboxylase 2…
AT4G36430	AT4G36430	Peroxidase superfamily protein [Source:NCBI gene (formerly Entrezgene);Acc:829795]	-0.826291	-0.586988	NS	NS	NS	NS	-0.876453	-1.22289	NS	NS		Peroxidase superfamily protein; FUNCTIONS IN: peroxidase activity, heme binding; INVOLVED IN: response to other organism; LOCATED IN: cell wall; EXPRESSED IN: 8 plant structures; EXPRESSED DURING: 4 anthesis, C globular stage, 4 leaf senescence stage; CONTAINS InterPro DOMAIN/s: Haem peroxidase (InterPro:IPR010255), Plant peroxidase (InterPro:IPR000823), Peroxidases heam-ligand binding site (Inte…
AT5G05340	PRX52	Peroxidase superfamily protein [Source:NCBI gene (formerly Entrezgene);Acc:830416]	-1.23967	NS	NS	NS	1.94199	NS	NS	NS	NS	NS		Peroxidase superfamily protein; FUNCTIONS IN: protein binding, peroxidase activity; INVOLVED IN: response to oxidative stress, oxidation reduction; LOCATED IN: apoplast, cell wall; EXPRESSED IN: 9 plant structures; EXPRESSED DURING: LP.04 four leaves visible, 4 anthesis, C globular stage, petal differentiation and expansion stage; CONTAINS InterPro DOMAIN/s: Haem peroxidase (InterPro:IPR010255), …
AT5G06290	2-Cys Prx B	2-cysteine peroxiredoxin B [Source:NCBI gene (formerly Entrezgene);Acc:830517]	-0.607446	NS	NS	NS	NS	NS	NS	NS	NS	-0.621762		2-cysteine peroxiredoxin B (2-Cys Prx B); FUNCTIONS IN: peroxiredoxin activity, antioxidant activity; INVOLVED IN: response to cold, defense response to bacterium; LOCATED IN: apoplast, stromule, chloroplast stroma, chloroplast; EXPRESSED IN: 23 plant structures; EXPRESSED DURING: 13 growth stages; CONTAINS InterPro DOMAIN/s: Peroxiredoxin, C-terminal (InterPro:IPR019479), Thioredoxin fold (Inter…
AT5G06720	PA2	peroxidase 2 [Source:NCBI gene (formerly Entrezgene);Acc:830561]	-1.20101	NS	NS	NS	NS	NS	NS	NS	NS	NS		peroxidase 2 (PA2); FUNCTIONS IN: peroxidase activity, heme binding; INVOLVED IN: oxidation reduction, response to oxidative stress; LOCATED IN: endomembrane system; EXPRESSED IN: 21 plant structures; EXPRESSED DURING: 11 growth stages; CONTAINS InterPro DOMAIN/s: Haem peroxidase (InterPro:IPR010255), Plant peroxidase (InterPro:IPR000823), Peroxidases heam-ligand binding site (InterPro:IPR019793)…
AT5G18100	CSD3	copper/zinc superoxide dismutase 3 [Source:NCBI gene (formerly Entrezgene);Acc:831928]	-0.476715	NS	NS	NS	NS	NS	NS	NS	NS	NS		copper/zinc superoxide dismutase 3 (CSD3); FUNCTIONS IN: superoxide dismutase activity; INVOLVED IN: response to oxidative stress, oxygen and reactive oxygen species metabolic process, removal of superoxide radicals; LOCATED IN: peroxisome, vacuole; EXPRESSED IN: 22 plant structures; EXPRESSED DURING: 13 growth stages; CONTAINS InterPro DOMAIN/s: Superoxide dismutase, copper/zinc, binding site (I…
AT5G19875	AT5G19875	transmembrane protein [Source:NCBI gene (formerly Entrezgene);Acc:832109]	-1.1011	NS	NS	NS	NS	NS	-1.77588	NS	-1.78957	-1.28912		unknown protein; FUNCTIONS IN: molecular_function unknown; INVOLVED IN: response to oxidative stress; LOCATED IN: endomembrane system; EXPRESSED IN: 21 plant structures; EXPRESSED DURING: 13 growth stages; BEST Arabidopsis thaliana protein match is: unknown protein (TAIR:AT2G31940.1); Has 30201 Blast hits to 17322 proteins in 780 species: Archae - 12; Bacteria - 1396; Metazoa - 17338; Fungi - 342…
AT5G37980	AT5G37980	Zinc-binding dehydrogenase family protein [Source:NCBI gene (formerly Entrezgene);Acc:833777]	-1.25572	NS	NS	-2.01589	NS	NS	NS	NS	NS	NS	v	Zinc-binding dehydrogenase family protein; FUNCTIONS IN: oxidoreductase activity, binding, catalytic activity, zinc ion binding; INVOLVED IN: response to oxidative stress, response to cyclopentenone; EXPRESSED IN: inflorescence meristem, leaf whorl, root; CONTAINS InterPro DOMAIN/s: GroES-like (InterPro:IPR011032), NAD(P)-binding domain (InterPro:IPR016040), Alcohol dehydrogenase, C-terminal (Int…
AT5G38000	AT5G38000	Zinc-binding dehydrogenase family protein [Source:NCBI gene (formerly Entrezgene);Acc:833779]	-0.602913	NS	NS	NS	NS	NS	NS	NS	NS	NS	v	Zinc-binding dehydrogenase family protein; FUNCTIONS IN: oxidoreductase activity, binding, zinc ion binding, catalytic activity; INVOLVED IN: response to oxidative stress; CONTAINS InterPro DOMAIN/s: GroES-like (InterPro:IPR011032), NAD(P)-binding domain (InterPro:IPR016040), Alcohol dehydrogenase, C-terminal (InterPro:IPR013149), Alcohol dehydrogenase superfamily, zinc-containing (InterPro:IPR00…
AT5G46350	WRKY8	WRKY DNA-binding protein 8 [Source:NCBI gene (formerly Entrezgene);Acc:834678]	-2.70408	NS	NS	NS	NS	NS	NS	NS	NS	NS		WRKY DNA-binding protein 8 (WRKY8); CONTAINS InterPro DOMAIN/s: DNA-binding WRKY (InterPro:IPR003657), Transcription factor, WRKY group IIc (InterPro:IPR017396); BEST Arabidopsis thaliana protein match is: WRKY DNA-binding protein 28 (TAIR:AT4G18170.1); Has 1807 Blast hits to 1807 proteins in 277 species: Archae - 0; Bacteria - 0; Metazoa - 736; Fungi - 347; Plants - 385; Viruses - 0; Other Eukar…
AT5G59720	HSP18.2	heat shock protein 18.2 [Source:NCBI gene (formerly Entrezgene);Acc:836093]	-1.16556	NS	NS	NS	NS	NS	-0.98728	NS	NS	NS		heat shock protein 18.2 (HSP18.2); CONTAINS InterPro DOMAIN/s: Heat shock protein Hsp20 (InterPro:IPR002068), HSP20-like chaperone (InterPro:IPR008978); BEST Arabidopsis thaliana protein match is: HSP20-like chaperones superfamily protein (TAIR:AT1G53540.1); Has 1807 Blast hits to 1807 proteins in 277 species: Archae - 0; Bacteria - 0; Metazoa - 736; Fungi - 347; Plants - 385; Viruses - 0; Other …
GO enrichment analysis
GO-BP
Enrichment FDR	nGenes	Biological Process (BP)	Pathway Genes	Fold Enrichment
3.2e-18	11	Hydrogen peroxide catabolic proc.	99	99
2.7e-17	11	Hydrogen peroxide metabolic proc.	122	80.4
4.5e-19	13	Cellular oxidant detoxification	176	65.8
1.1e-18	13	Cellular detoxification	194	59.7
1.1e-18	13	Cellular response to toxic substance	195	59.4
1.4e-50	30	Response to oxidative stress	454	58.9
7e-17	12	Reactive oxygen species metabolic proc.	199	53.7
2.4e-10	8	Response to reactive oxygen species	161	44.3
1.4e-16	13	Detoxification	299	38.7
1.5e-17	14	Response to toxic substance	340	36.7
4.6e-08	9	Response to salt stress	474	16.9
1.6e-07	9	Response to osmotic stress	557	14.4
2e-07	10	Response to inorganic substance	790	11.3
1.1e-12	18	Cellular response to chemical stimulus	1791	9
5.8e-08	13	Cellular catabolic proc.	1478	7.8
1.1e-18	26	Response to chemical	3091	7.5
1.2e-24	31	Response to stress	3953	7
2.3e-07	13	Response to oxygen-containing compound	1679	6.9
4.8e-07	14	Response to abiotic stimulus	2170	5.7
GO-MF
Enrichment FDR	nGenes	Molecular Function (MF)	Pathway Genes	Fold Enrichment
0.04	1	Oxidoreductase activity acting on a sulfur group of donors quinone or	4	222.8
0.04	1	Glutathione dehydrogenase (ascorbate) activity	4	222.8
0.0012	2	2-alkenal reductase [NAD(P)+] activity	13	137.1
1.2e-16	11	Peroxidase activity	136	72.1
1.9e-19	13	Antioxidant activity	167	69.4
1.4e-16	11	Oxidoreductase activity acting on peroxide as acceptor	143	68.6
0.015	2	Oxidoreductase activity acting on the CH-CH group of donors NAD or NA	48	37.1
5.1e-12	11	Heme binding	385	25.5
1.1e-11	11	Tetrapyrrole binding	421	23.3
1.4e-13	18	Oxidoreductase activity	1598	10
6.1e-05	15	Metal ion binding	3803	3.5
6.1e-05	15	Cation binding	3824	3.5
GO-CC
Enrichment FDR	nGenes	Cellular Component (CC)	Pathway Genes	Fold Enrichment
6.2e-08	12	Vacuole	1188	9
0.018	4	Apoplast	457	7.8
6.2e-08	14	Extracellular region	1876	6.7
Transcription factor enrichment analysis					TF Expression Log2 FC (FL/GC)
TF-AGRIS						Root					Shoot
Enrichment FDR	nGenes	Transcription Factor Binding Motif	Pathway Genes	Fold Enrichment		Col	adc1	OXPtADC	cdr7/cuao3	OXCuAO3	Col	adc1	OXPtADC	cdr7/cuao3	OXCuAO3
0.02	12	BZIP50 target	3324	3.2	AT1G77920	0.707172	NS	NS	NS	NS	NS	NS	NS	NS	NS

## Sheet: Group IV-OS
GO- and Transcription Factor- Enrichment analyses of group-IVOS genes			DEG Expcression log2 FC (FL/GC)
Gene Annotation			Root	adc1-R	OXPtADC-R	cdr7/cuao3-R	OXCuAO3-R	Shoot	adc1-S	OXPtADC-S	cdr7/cuao3-S	OXCuAO3-S	Annotation
Gene ID	Symbol	Description	Col	adc1	OXPtADC	cdr7/cuao3	OXCuAO3	Col	adc1	OXPtADC	cdr7/cuao3	OXCuAO3
AT1G03680	THM1	thioredoxin M-type 1 [Source:NCBI gene (formerly Entrezgene);Acc:839436]	NS	NS	NS	NS	NS	-0.638765	-0.378021	NS	-0.651587	-0.415455	thioredoxin M-type 1 (THM1); FUNCTIONS IN: enzyme activator activity; INVOLVED IN: response to oxidative stress, response to cold, positive regulation of catalytic activity; LOCATED IN: thylakoid, apoplast, stromule, chloroplast, chloroplast stroma; EXPRESSED IN: 24 plant structures; EXPRESSED DURING: 14 growth stages; CONTAINS InterPro DOMAIN/s: Thioredoxin fold (InterPro:IPR012335), Thioredoxin…
AT1G05680	UGT74E2	Uridine diphosphate glycosyltransferase 74E2 [Source:NCBI gene (formerly Entrezgene);Acc:837075]	NS	NS	-0.887074	NS	NS	-2.13856	NS	NS	NS	NS	Uridine diphosphate glycosyltransferase 74E2 (UGT74E2); CONTAINS InterPro DOMAIN/s: UDP-glucuronosyl/UDP-glucosyltransferase (InterPro:IPR002213); BEST Arabidopsis thaliana protein match is: UDP-Glycosyltransferase superfamily protein (TAIR:AT1G05675.1); Has 8397 Blast hits to 8309 proteins in 513 species: Archae - 0; Bacteria - 605; Metazoa - 2499; Fungi - 31; Plants - 5061; Viruses - 123; Other…
AT1G05690	BT3	BTB and TAZ domain protein 3 [Source:NCBI gene (formerly Entrezgene);Acc:837076]	NS	NS	NS	NS	NS	-0.935758	NS	NS	NS	-1.2158	BTB and TAZ domain protein 3 (BT3); FUNCTIONS IN: transcription regulator activity; INVOLVED IN: embryo sac development, pollen development; LOCATED IN: nucleus, chloroplast; EXPRESSED IN: 15 plant structures; EXPRESSED DURING: 8 growth stages; CONTAINS InterPro DOMAIN/s: BTB/POZ (InterPro:IPR013069), Zinc finger, TAZ-type (InterPro:IPR000197), BTB/POZ fold (InterPro:IPR011333), Kelch related (In…
AT1G07890	APX1	ascorbate peroxidase 1 [Source:NCBI gene (formerly Entrezgene);Acc:837304]	NS	NS	NS	NS	NS	-1.00864	NS	NS	-1.28194	-0.573528	ascorbate peroxidase 1 (APX1); FUNCTIONS IN: L-ascorbate peroxidase activity; INVOLVED IN: in 6 processes; LOCATED IN: cytosol, cell wall, chloroplast, plasma membrane, chloroplast stroma; EXPRESSED IN: 27 plant structures; EXPRESSED DURING: 16 growth stages; CONTAINS InterPro DOMAIN/s: Haem peroxidase (InterPro:IPR010255), Plant ascorbate peroxidase (InterPro:IPR002207), Peroxidases heam-ligand …
AT1G12480	OZS1	C4-dicarboxylate transporter/malic acid transport protein [Source:NCBI gene (formerly Entrezgene);Acc:837805]	NS	NS	NS	NS	NS	-0.972343	NS	NS	NS	NS	OZONE-SENSITIVE 1 (OZS1); CONTAINS InterPro DOMAIN/s: C4-dicarboxylate transporter/malic acid transport protein (InterPro:IPR004695); BEST Arabidopsis thaliana protein match is: SLAC1 homologue 3 (TAIR:AT5G24030.1); Has 903 Blast hits to 900 proteins in 365 species: Archae - 17; Bacteria - 650; Metazoa - 0; Fungi - 31; Plants - 165; Viruses - 0; Other Eukaryotes - 40 (source: NCBI BLink).
AT1G27350	AT1G27350	Ribosome associated membrane protein RAMP4 [Source:NCBI gene (formerly Entrezgene);Acc:839624]	NS	NS	NS	-0.5087	NS	-0.772974	NS	NS	NS	NS	Ribosome associated membrane protein RAMP4; CONTAINS InterPro DOMAIN/s: Ribosome associated membrane RAMP4 (InterPro:IPR010580); BEST Arabidopsis thaliana protein match is: Ribosome associated membrane protein RAMP4 (TAIR:AT1G27330.1); Has 348 Blast hits to 348 proteins in 106 species: Archae - 0; Bacteria - 0; Metazoa - 210; Fungi - 0; Plants - 100; Viruses - 0; Other Eukaryotes - 38 (source: NC…
AT1G32220	AT1G32220	NAD(P)-binding Rossmann-fold superfamily protein [Source:NCBI gene (formerly Entrezgene);Acc:840114]	NS	NS	NS	NS	NS	-1.10134	-0.589126	-0.738614	-0.662684	-0.857664	NAD(P)-binding Rossmann-fold superfamily protein; FUNCTIONS IN: coenzyme binding, binding, catalytic activity; INVOLVED IN: response to oxidative stress; LOCATED IN: thylakoid, chloroplast, plastoglobule; EXPRESSED IN: 24 plant structures; EXPRESSED DURING: 15 growth stages; CONTAINS InterPro DOMAIN/s: NAD-dependent epimerase/dehydratase (InterPro:IPR001509), NAD(P)-binding domain (InterPro:IPR01…
AT1G54050	AT1G54050	HSP20-like chaperones superfamily protein [Source:NCBI gene (formerly Entrezgene);Acc:841843]	NS	NS	NS	NS	NS	-1.56263	-1.56044	-1.68799	-2.04272	-1.21066	HSP20-like chaperones superfamily protein; CONTAINS InterPro DOMAIN/s: Heat shock protein Hsp20 (InterPro:IPR002068), HSP20-like chaperone (InterPro:IPR008978); BEST Arabidopsis thaliana protein match is: heat shock protein 17.6A (TAIR:AT5G12030.1); Has 4491 Blast hits to 4491 proteins in 1181 species: Archae - 166; Bacteria - 2520; Metazoa - 2; Fungi - 140; Plants - 1242; Viruses - 0; Other Euka…
AT1G72520	LOX4	PLAT/LH2 domain-containing lipoxygenase family protein [Source:NCBI gene (formerly Entrezgene);Acc:843584]	NS	NS	NS	NS	NS	-0.640933	NS	NS	NS	NS	PLAT/LH2 domain-containing lipoxygenase family protein; FUNCTIONS IN: oxidoreductase activity, acting on single donors with incorporation of molecular oxygen, incorporation of two atoms of oxygen, lipoxygenase activity, iron ion binding, metal ion binding; INVOLVED IN: growth, jasmonic acid biosynthetic process, response to wounding, defense response; LOCATED IN: chloroplast; EXPRESSED IN: 17 pla…
AT1G75100	JAC1	J-domain protein required for chloroplast accumulation response 1 [Source:NCBI gene (formerly Entrezgene);Acc:843847]	NS	NS	NS	NS	NS	-0.772374	-0.792614	-0.72242	NS	-0.641012	J-domain protein required for chloroplast accumulation response 1 (JAC1); FUNCTIONS IN: heat shock protein binding; INVOLVED IN: chloroplast accumulation movement; LOCATED IN: cytoplasm; EXPRESSED IN: 21 plant structures; EXPRESSED DURING: 13 growth stages; CONTAINS InterPro DOMAIN/s: Heat shock protein DnaJ, N-terminal (InterPro:IPR001623); BEST Arabidopsis thaliana protein match is: Chaperone D…
AT1G75280	AT1G75280	NmrA-like negative transcriptional regulator family protein [Source:NCBI gene (formerly Entrezgene);Acc:843865]	NS	NS	NS	NS	NS	-0.978399	NS	NS	-0.808105	NS	NmrA-like negative transcriptional regulator family protein; FUNCTIONS IN: binding, catalytic activity; INVOLVED IN: response to oxidative stress, response to cadmium ion, response to cyclopentenone; LOCATED IN: plasma membrane; EXPRESSED IN: 26 plant structures; EXPRESSED DURING: 13 growth stages; CONTAINS InterPro DOMAIN/s: NAD(P)-binding domain (InterPro:IPR016040), NmrA-like (InterPro:IPR0080…
AT1G77490	TAPX	thylakoidal ascorbate peroxidase [Source:NCBI gene (formerly Entrezgene);Acc:844085]	NS	NS	NS	NS	NS	-0.551902	-0.48778	-0.565117	NS	-0.698817	thylakoidal ascorbate peroxidase (TAPX); FUNCTIONS IN: L-ascorbate peroxidase activity; INVOLVED IN: oxidation reduction, response to oxidative stress; LOCATED IN: thylakoid, chloroplast thylakoid membrane, chloroplast; EXPRESSED IN: 21 plant structures; EXPRESSED DURING: 13 growth stages; CONTAINS InterPro DOMAIN/s: Haem peroxidase (InterPro:IPR010255), Plant ascorbate peroxidase (InterPro:IPR00…
AT2G16500	ADC1	arginine decarboxylase 1 [Source:NCBI gene (formerly Entrezgene);Acc:816149]	NS	NS	NS	NS	NS	-1.15711	NS	-0.733565	-0.800787	-0.979962	arginine decarboxylase 1 (ADC1); CONTAINS InterPro DOMAIN/s: Orn/DAP/Arg decarboxylase 2, C-terminal (InterPro:IPR022643), Orn/DAP/Arg decarboxylase 2, conserved site (InterPro:IPR022657), Orn/DAP/Arg decarboxylase 2, pyridoxal-phosphate binding site (InterPro:IPR022653), Ornithine/DAP/Arg decarboxylase (InterPro:IPR000183), Arginine decarboxylase (InterPro:IPR002985), Orn/DAP/Arg decarboxylase 2…
AT2G19310	AT2G19310	HSP20-like chaperones superfamily protein [Source:NCBI gene (formerly Entrezgene);Acc:816448]	NS	NS	NS	NS	NS	-1.54624	-1.02281	NS	NS	-0.735314	HSP20-like chaperones superfamily protein; CONTAINS InterPro DOMAIN/s: HSP20-like chaperone (InterPro:IPR008978); BEST Arabidopsis thaliana protein match is: HSP20-like chaperones superfamily protein (TAIR:AT1G07400.1); Has 749 Blast hits to 749 proteins in 86 species: Archae - 0; Bacteria - 0; Metazoa - 0; Fungi - 34; Plants - 701; Viruses - 0; Other Eukaryotes - 14 (source: NCBI BLink).
AT2G20270	AT2G20270	Thioredoxin superfamily protein [Source:NCBI gene (formerly Entrezgene);Acc:816546]	NS	NS	NS	NS	NS	-0.562788	NS	NS	NS	NS	Thioredoxin superfamily protein; FUNCTIONS IN: electron carrier activity, arsenate reductase (glutaredoxin) activity, protein disulfide oxidoreductase activity; INVOLVED IN: cell redox homeostasis; LOCATED IN: chloroplast, chloroplast stroma; EXPRESSED IN: 24 plant structures; EXPRESSED DURING: 13 growth stages; CONTAINS InterPro DOMAIN/s: Glutaredoxin (InterPro:IPR002109), Glutaredoxin subgroup …
AT2G31570	GPX2	glutathione peroxidase 2 [Source:NCBI gene (formerly Entrezgene);Acc:817715]	NS	NS	NS	-0.497945	NS	-0.414533	NS	NS	NS	NS	glutathione peroxidase 2 (GPX2); FUNCTIONS IN: glutathione peroxidase activity; INVOLVED IN: oxidation reduction, response to oxidative stress; LOCATED IN: cytosol; EXPRESSED IN: 24 plant structures; EXPRESSED DURING: 13 growth stages; CONTAINS InterPro DOMAIN/s: Thioredoxin fold (InterPro:IPR012335), Thioredoxin-like fold (InterPro:IPR012336), Glutathione peroxidase (InterPro:IPR000889); BEST Ar…
AT2G37860	LCD1	reticulata-like protein, putative (DUF3411) [Source:NCBI gene (formerly Entrezgene);Acc:818362]	NS	NS	NS	NS	NS	-0.854017	-0.632125	NS	NS	-0.669156	LOWER CELL DENSITY 1 (LCD1); FUNCTIONS IN: molecular_function unknown; INVOLVED IN: leaf development; LOCATED IN: chloroplast, membrane; EXPRESSED IN: 24 plant structures; EXPRESSED DURING: 13 growth stages; CONTAINS InterPro DOMAIN/s: Protein of unknown function DUF3411 (InterPro:IPR021825); BEST Arabidopsis thaliana protein match is: reticulata-related 1 (TAIR:AT5G22790.1); Has 533 Blast hits t…
AT2G39460	RPL23AA	ribosomal protein L23AA [Source:NCBI gene (formerly Entrezgene);Acc:818531]	NS	NS	NS	NS	NS	-0.595825	-0.438447	NS	NS	-0.611954	ribosomal protein L23AA (RPL23AA); FUNCTIONS IN: structural constituent of ribosome, RNA binding, nucleotide binding; INVOLVED IN: response to oxidative stress, response to high light intensity, response to cold, translation, ribosome biogenesis; LOCATED IN: in 6 components; EXPRESSED IN: 25 plant structures; EXPRESSED DURING: 13 growth stages; CONTAINS InterPro DOMAIN/s: Ribosomal protein L23/L2…
AT2G40750	WRKY54	WRKY DNA-binding protein 54 [Source:NCBI gene (formerly Entrezgene);Acc:818670]	NS	NS	NS	NS	NS	-1.07525	-2.72334	NS	-2.73215	NS	WRKY DNA-binding protein 54 (WRKY54); CONTAINS InterPro DOMAIN/s: DNA-binding WRKY (InterPro:IPR003657); BEST Arabidopsis thaliana protein match is: WRKY DNA-binding protein 70 (TAIR:AT3G56400.1); Has 3183 Blast hits to 2752 proteins in 165 species: Archae - 0; Bacteria - 0; Metazoa - 0; Fungi - 0; Plants - 3171; Viruses - 0; Other Eukaryotes - 12 (source: NCBI BLink).
AT2G41090	AT2G41090	Calcium-binding EF-hand family protein [Source:NCBI gene (formerly Entrezgene);Acc:818708]	NS	NS	NS	NS	NS	-1.01028	-0.698447	-0.849569	-0.657323	NS	Calcium-binding EF-hand family protein; FUNCTIONS IN: calcium ion binding; LOCATED IN: cellular_component unknown; EXPRESSED IN: 21 plant structures; EXPRESSED DURING: 14 growth stages; CONTAINS InterPro DOMAIN/s: EF-Hand 1, calcium-binding site (InterPro:IPR018247), EF-HAND 2 (InterPro:IPR018249), EF-hand-like domain (InterPro:IPR011992), Calcium-binding EF-hand (InterPro:IPR002048), EF-hand (In…
AT2G41680	NTRC	NADPH-dependent thioredoxin reductase C [Source:NCBI gene (formerly Entrezgene);Acc:818766]	NS	NS	NS	NS	NS	-0.707193	-0.773589	NS	NS	-0.951543	NADPH-dependent thioredoxin reductase C (NTRC); FUNCTIONS IN: thioredoxin-disulfide reductase activity; INVOLVED IN: hydrogen peroxide catabolic process; LOCATED IN: chloroplast stroma, chloroplast; EXPRESSED IN: 23 plant structures; EXPRESSED DURING: 13 growth stages; CONTAINS InterPro DOMAIN/s: Pyridine nucleotide-disulphide oxidoreductase, class-II (InterPro:IPR000103), FAD-dependent pyridine …
AT3G04120	GAPC1	glyceraldehyde-3-phosphate dehydrogenase C subunit 1 [Source:NCBI gene (formerly Entrezgene);Acc:819567]	NS	NS	-0.754332	NS	NS	-0.859823	-0.525693	NS	-0.900276	-0.660205	glyceraldehyde-3-phosphate dehydrogenase C subunit 1 (GAPC1); FUNCTIONS IN: glyceraldehyde-3-phosphate dehydrogenase (phosphorylating) activity, copper ion binding, glyceraldehyde-3-phosphate dehydrogenase activity; INVOLVED IN: in 11 processes; LOCATED IN: in 8 components; EXPRESSED IN: 28 plant structures; EXPRESSED DURING: 16 growth stages; CONTAINS InterPro DOMAIN/s: Glyceraldehyde 3-phosphat…
AT3G06050	PRXIIF	peroxiredoxin IIF [Source:NCBI gene (formerly Entrezgene);Acc:819778]	NS	NS	NS	NS	NS	-0.639353	-0.477369	NS	NS	NS	peroxiredoxin IIF (PRXIIF); FUNCTIONS IN: peroxidase activity, antioxidant activity; INVOLVED IN: response to oxidative stress, response to cadmium ion; LOCATED IN: mitochondrion, mitochondrial matrix; EXPRESSED IN: 27 plant structures; EXPRESSED DURING: 17 growth stages; CONTAINS InterPro DOMAIN/s: Thioredoxin fold (InterPro:IPR012335), Thioredoxin-like (InterPro:IPR017936), Thioredoxin-like fol…
AT3G10920	MSD1	manganese superoxide dismutase 1 [Source:NCBI gene (formerly Entrezgene);Acc:820263]	NS	NS	NS	NS	NS	-0.496194	NS	NS	NS	NS	manganese superoxide dismutase 1 (MSD1); FUNCTIONS IN: superoxide dismutase activity, copper ion binding, metal ion binding; INVOLVED IN: response to zinc ion, response to salt stress, defense response to bacterium, removal of superoxide radicals, embryo development ending in seed dormancy; LOCATED IN: mitochondrion; EXPRESSED IN: 25 plant structures; EXPRESSED DURING: 14 growth stages; CONTAINS …
AT3G11630	AT3G11630	Thioredoxin superfamily protein [Source:NCBI gene (formerly Entrezgene);Acc:820335]	NS	NS	NS	NS	NS	-0.709013	-0.755754	NS	NS	-0.872731	Thioredoxin superfamily protein; FUNCTIONS IN: peroxiredoxin activity, antioxidant activity; INVOLVED IN: response to cold, defense response to bacterium; LOCATED IN: in 6 components; EXPRESSED IN: 26 plant structures; EXPRESSED DURING: 15 growth stages; CONTAINS InterPro DOMAIN/s: Peroxiredoxin, C-terminal (InterPro:IPR019479), Thioredoxin fold (InterPro:IPR012335), Alkyl hydroperoxide reductase…
AT3G12260	AT3G12260	LYR family of Fe/S cluster biosis protein [Source:NCBI gene (formerly Entrezgene);Acc:820406]	NS	NS	NS	NS	NS	-0.457968	-0.468421	NS	NS	NS	LYR family of Fe/S cluster biogenesis protein; FUNCTIONS IN: catalytic activity; LOCATED IN: mitochondrion, respiratory chain complex I, membrane; EXPRESSED IN: 23 plant structures; EXPRESSED DURING: 14 growth stages; Has 252 Blast hits to 252 proteins in 114 species: Archae - 0; Bacteria - 0; Metazoa - 119; Fungi - 50; Plants - 50; Viruses - 0; Other Eukaryotes - 33 (source: NCBI BLink).
AT3G15360	TRX-M4	thioredoxin M-type 4 [Source:NCBI gene (formerly Entrezgene);Acc:820775]	NS	NS	NS	NS	NS	-1.12294	-0.905126	NS	-0.945272	-0.875946	thioredoxin M-type 4 (TRX-M4); FUNCTIONS IN: enzyme activator activity; INVOLVED IN: response to oxidative stress, positive regulation of catalytic activity; LOCATED IN: thylakoid, chloroplast thylakoid membrane, cell wall, chloroplast, chloroplast envelope; EXPRESSED IN: 24 plant structures; EXPRESSED DURING: 13 growth stages; CONTAINS InterPro DOMAIN/s: Thioredoxin fold (InterPro:IPR012335), Th…
AT3G16670	AT3G16670	Pollen Ole e 1 allergen and extensin family protein [Source:NCBI gene (formerly Entrezgene);Acc:820919]	NS	NS	NS	NS	NS	-1.23672	NS	-1.28342	-0.922802	-0.649444	Pollen Ole e 1 allergen and extensin family protein; FUNCTIONS IN: molecular_function unknown; INVOLVED IN: response to oxidative stress; LOCATED IN: endomembrane system; EXPRESSED IN: 9 plant structures; EXPRESSED DURING: 7 growth stages; CONTAINS InterPro DOMAIN/s: Pollen Ole e 1 allergen/extensin (InterPro:IPR006041); BEST Arabidopsis thaliana protein match is: Pollen Ole e 1 allergen and exte…
AT3G17070	AT3G17070	Peroxidase family protein [Source:NCBI gene (formerly Entrezgene);Acc:820964]	NS	NS	NS	NS	NS	-0.657309	0.698647	NS	NS	NS	Peroxidase family protein; FUNCTIONS IN: peroxidase activity, heme binding; INVOLVED IN: response to oxidative stress, oxidation reduction; LOCATED IN: endomembrane system; EXPRESSED IN: guard cell; CONTAINS InterPro DOMAIN/s: Haem peroxidase (InterPro:IPR010255), Plant peroxidase (InterPro:IPR000823), Haem peroxidase, plant/fungal/bacterial (InterPro:IPR002016); BEST Arabidopsis thaliana protein…
AT3G17800	AT3G17800	alanine-tRNA ligase, putative (DUF760) [Source:NCBI gene (formerly Entrezgene);Acc:821048]	NS	NS	NS	NS	NS	-0.592071	NS	NS	NS	-0.486177	FUNCTIONS IN: molecular_function unknown; INVOLVED IN: response to UV-B; LOCATED IN: chloroplast; EXPRESSED IN: 23 plant structures; EXPRESSED DURING: 13 growth stages; CONTAINS InterPro DOMAIN/s: Protein of unknown function DUF760 (InterPro:IPR008479); BEST Arabidopsis thaliana protein match is: Protein of unknown function (DUF760) (TAIR:AT1G48450.1); Has 157 Blast hits to 157 proteins in 32 spe…
AT3G25530	GLYR1	glyoxylate reductase 1 [Source:NCBI gene (formerly Entrezgene);Acc:822139]	NS	NS	NS	NS	NS	-0.850096	-0.450767	NS	NS	-0.428531	glyoxylate reductase 1 (GLYR1); FUNCTIONS IN: 3-hydroxybutyrate dehydrogenase activity, phosphogluconate dehydrogenase (decarboxylating) activity; INVOLVED IN: response to oxidative stress; LOCATED IN: cytosol; EXPRESSED IN: 23 plant structures; EXPRESSED DURING: 15 growth stages; CONTAINS InterPro DOMAIN/s: 6-phosphogluconate dehydrogenase, NAD-binding (InterPro:IPR006115), 6-phosphogluconate de…
AT3G47860	CHL	chloroplastic lipocalin [Source:NCBI gene (formerly Entrezgene);Acc:823942]	NS	NS	NS	NS	NS	-0.380253	NS	NS	NS	NS	chloroplastic lipocalin (CHL); FUNCTIONS IN: binding; INVOLVED IN: response to oxidative stress; LOCATED IN: thylakoid lumen, chloroplast thylakoid membrane, chloroplast; EXPRESSED IN: 22 plant structures; EXPRESSED DURING: 13 growth stages; CONTAINS InterPro DOMAIN/s: Lipocalin-like (InterPro:IPR013208), Lipocalin conserved site (InterPro:IPR022272), Calycin (InterPro:IPR012674), Calycin-like (I…
AT3G49260	iqd21	IQ-domain 21 [Source:NCBI gene (formerly Entrezgene);Acc:824087]	NS	NS	NS	NS	NS	-0.607643	-0.626157	-0.639454	NS	-0.753208	IQ-domain 21 (iqd21); CONTAINS InterPro DOMAIN/s: IQ calmodulin-binding region (InterPro:IPR000048); BEST Arabidopsis thaliana protein match is: IQ-domain 2 (TAIR:AT5G03040.3); Has 906 Blast hits to 903 proteins in 65 species: Archae - 0; Bacteria - 4; Metazoa - 85; Fungi - 8; Plants - 792; Viruses - 0; Other Eukaryotes - 17 (source: NCBI BLink).
AT3G53990	AT3G53990	Adenine nucleotide alpha hydrolases-like superfamily protein [Source:NCBI gene (formerly Entrezgene);Acc:824566]	NS	NS	NS	NS	NS	-0.502299	NS	NS	NS	NS	Adenine nucleotide alpha hydrolases-like superfamily protein; FUNCTIONS IN: molecular_function unknown; INVOLVED IN: response to cold, response to stress; LOCATED IN: cellular_component unknown; EXPRESSED IN: 23 plant structures; EXPRESSED DURING: 14 growth stages; CONTAINS InterPro DOMAIN/s: UspA (InterPro:IPR006016), Rossmann-like alpha/beta/alpha sandwich fold (InterPro:IPR014729), Universal s…
AT3G55280	RPL23AB	ribosomal protein L23AB [Source:NCBI gene (formerly Entrezgene);Acc:824694]	NS	NS	NS	NS	NS	-0.640518	NS	NS	-0.605413	-0.674804	ribosomal protein L23AB (RPL23AB); FUNCTIONS IN: structural constituent of ribosome, RNA binding, nucleotide binding; INVOLVED IN: response to oxidative stress, response to high light intensity, response to cold, translation, ribosome biogenesis; LOCATED IN: cytosolic ribosome, cytosolic large ribosomal subunit, intracellular, membrane; EXPRESSED IN: 24 plant structures; EXPRESSED DURING: 13 grow…
AT3G56400	WRKY70	WRKY DNA-binding protein 70 [Source:NCBI gene (formerly Entrezgene);Acc:824807]	NS	NS	NS	NS	NS	-1.38728	NS	NS	NS	NS	WRKY DNA-binding protein 70 (WRKY70); CONTAINS InterPro DOMAIN/s: DNA-binding WRKY (InterPro:IPR003657); BEST Arabidopsis thaliana protein match is: WRKY DNA-binding protein 54 (TAIR:AT2G40750.1); Has 3203 Blast hits to 2772 proteins in 182 species: Archae - 0; Bacteria - 0; Metazoa - 0; Fungi - 0; Plants - 3190; Viruses - 0; Other Eukaryotes - 13 (source: NCBI BLink).
AT4G00860	ATOZI1	monopolar spindle protein (DUF1138) [Source:NCBI gene (formerly Entrezgene);Acc:826213]	NS	NS	NS	NS	NS	-0.576453	NS	NS	NS	NS	ATOZI1; FUNCTIONS IN: molecular_function unknown; INVOLVED IN: response to reactive oxygen species, response to bacterium, response to ozone; LOCATED IN: mitochondrion, peroxisome, plastid, membrane; EXPRESSED IN: 25 plant structures; EXPRESSED DURING: 15 growth stages; CONTAINS InterPro DOMAIN/s: Protein of unknown function DUF1138 (InterPro:IPR009515); BEST Arabidopsis thaliana protein match is…
AT4G08390	SAPX	stromal ascorbate peroxidase [Source:NCBI gene (formerly Entrezgene);Acc:826396]	NS	NS	NS	NS	NS	-0.58552	-0.761567	NS	NS	-0.68515	stromal ascorbate peroxidase (SAPX); FUNCTIONS IN: L-ascorbate peroxidase activity; INVOLVED IN: response to oxidative stress, oxidation reduction; LOCATED IN: mitochondrion, chloroplast stroma, chloroplast, membrane; EXPRESSED IN: 22 plant structures; EXPRESSED DURING: 15 growth stages; CONTAINS InterPro DOMAIN/s: Haem peroxidase (InterPro:IPR010255), Plant ascorbate peroxidase (InterPro:IPR0022…
AT4G09320	NDPK1	nucleoside diphosphate kinase [Source:NCBI gene (formerly Entrezgene);Acc:826515]	NS	NS	NS	NS	NS	-0.604755	NS	NS	NS	NS	NDPK1; FUNCTIONS IN: nucleoside diphosphate kinase activity, ATP binding; INVOLVED IN: response to cadmium ion, response to salt stress; LOCATED IN: apoplast, peroxisome, chloroplast, plasma membrane, vacuole; EXPRESSED IN: 30 plant structures; EXPRESSED DURING: 15 growth stages; CONTAINS InterPro DOMAIN/s: Nucleoside diphosphate kinase, core (InterPro:IPR001564); BEST Arabidopsis thaliana protei…
AT4G12000	AT4G12000	SNARE associated Golgi protein family [Source:NCBI gene (formerly Entrezgene);Acc:826807]	NS	NS	NS	NS	NS	-1.46507	-1.5047	NS	-1.98733	-1.1959	SNARE associated Golgi protein family; CONTAINS InterPro DOMAIN/s: SNARE associated Golgi protein (InterPro:IPR015414); BEST Arabidopsis thaliana protein match is: SNARE associated Golgi protein family (TAIR:AT4G22850.1); Has 1565 Blast hits to 1562 proteins in 407 species: Archae - 8; Bacteria - 720; Metazoa - 121; Fungi - 35; Plants - 266; Viruses - 0; Other Eukaryotes - 415 (source: NCBI BLink…
AT4G17040	CLPR4	CLP protease R subunit 4 [Source:NCBI gene (formerly Entrezgene);Acc:827412]	NS	NS	NS	NS	NS	-0.443062	NS	NS	NS	NS	CLP protease R subunit 4 (CLPR4); FUNCTIONS IN: serine-type endopeptidase activity; INVOLVED IN: proteolysis; LOCATED IN: plastid stroma, chloroplast, chloroplast stroma, chloroplast envelope; EXPRESSED IN: 22 plant structures; EXPRESSED DURING: 13 growth stages; CONTAINS InterPro DOMAIN/s: Peptidase S14, ClpP (InterPro:IPR001907); BEST Arabidopsis thaliana protein match is: ATP-dependent caseino…
AT4G28730	GrxC5	Glutaredoxin family protein [Source:NCBI gene (formerly Entrezgene);Acc:828994]	NS	NS	NS	NS	NS	-0.622329	NS	NS	NS	-0.541117	Glutaredoxin family protein; FUNCTIONS IN: electron carrier activity, protein disulfide oxidoreductase activity; INVOLVED IN: cell redox homeostasis; LOCATED IN: chloroplast; CONTAINS InterPro DOMAIN/s: Thioredoxin fold (InterPro:IPR012335), Glutaredoxin (InterPro:IPR002109), Glutaredoxin subgroup (InterPro:IPR014025), Glutaredoxin, eukaryotic/virial (InterPro:IPR011899), Thioredoxin-like fold (I…
AT4G31870	GPX7	glutathione peroxidase 7 [Source:NCBI gene (formerly Entrezgene);Acc:829316]	NS	NS	NS	NS	NS	-2.36581	-1.6643	-2.19266	NS	-2.07518	glutathione peroxidase 7 (GPX7); FUNCTIONS IN: glutathione peroxidase activity; INVOLVED IN: response to karrikin; LOCATED IN: chloroplast; EXPRESSED IN: 23 plant structures; EXPRESSED DURING: 13 growth stages; CONTAINS InterPro DOMAIN/s: Thioredoxin fold (InterPro:IPR012335), Thioredoxin-like fold (InterPro:IPR012336), Glutathione peroxidase (InterPro:IPR000889); BEST Arabidopsis thaliana protei…
AT4G35460	NTRB	NADPH-dependent thioredoxin reductase B [Source:NCBI gene (formerly Entrezgene);Acc:829698]	NS	NS	NS	NS	NS	-0.881473	NS	NS	NS	NS	NADPH-dependent thioredoxin reductase B (NTRB); FUNCTIONS IN: thioredoxin-disulfide reductase activity; INVOLVED IN: pollen germination, thioredoxin biosynthetic process, cell growth, seed development, cell redox homeostasis; LOCATED IN: cytosol, mitochondrion, chloroplast envelope; CONTAINS InterPro DOMAIN/s: Pyridine nucleotide-disulphide oxidoreductase, class-II, active site (InterPro:IPR00825…
AT5G01410	RSR4	Aldolase-type TIM barrel family protein [Source:NCBI gene (formerly Entrezgene);Acc:831738]	NS	NS	NS	NS	NS	-0.545409	NS	NS	-0.825617	-0.644657	REDUCED SUGAR RESPONSE 4 (RSR4); FUNCTIONS IN: protein homodimerization activity, protein heterodimerization activity; INVOLVED IN: in 12 processes; LOCATED IN: cytosol, endomembrane system, plasma membrane; EXPRESSED IN: 26 plant structures; EXPRESSED DURING: 15 growth stages; CONTAINS InterPro DOMAIN/s: Vitamin B6 biosynthesis protein (InterPro:IPR001852), Ribulose-phosphate binding barrel (Int…
AT5G01820	SR1	serine/threonine protein kinase 1 [Source:NCBI gene (formerly Entrezgene);Acc:831765]	NS	NS	NS	NS	NS	-0.991161	-1.24497	NS	NS	-1.32312	serine/threonine protein kinase 1 (SR1); FUNCTIONS IN: protein serine/threonine kinase activity, protein kinase activity, kinase activity, ATP binding; INVOLVED IN: signal transduction, protein amino acid phosphorylation; LOCATED IN: vacuole; EXPRESSED IN: 23 plant structures; EXPRESSED DURING: 15 growth stages; CONTAINS InterPro DOMAIN/s: Protein kinase, ATP binding site (InterPro:IPR017441), Se…
AT5G07460	PMSR2	peptidemethionine sulfoxide reductase 2 [Source:NCBI gene (formerly Entrezgene);Acc:830637]	NS	NS	NS	NS	NS	-0.506957	NS	NS	-0.83676	NS	peptidemethionine sulfoxide reductase 2 (PMSR2); CONTAINS InterPro DOMAIN/s: Peptide methionine sulphoxide reductase MsrA (InterPro:IPR002569); BEST Arabidopsis thaliana protein match is: peptidemethionine sulfoxide reductase 3 (TAIR:AT5G07470.1); Has 1807 Blast hits to 1807 proteins in 277 species: Archae - 0; Bacteria - 0; Metazoa - 736; Fungi - 347; Plants - 385; Viruses - 0; Other Eukaryotes …
AT5G12080	MSL10	mechanosensitive channel of small conductance-like 10 [Source:NCBI gene (formerly Entrezgene);Acc:831081]	NS	NS	NS	NS	NS	-1.02185	-0.748462	NS	-0.964119	-0.843255	mechanosensitive channel of small conductance-like 10 (MSL10); FUNCTIONS IN: mechanically-gated ion channel activity; INVOLVED IN: detection of mechanical stimulus; LOCATED IN: plasma membrane, membrane; EXPRESSED IN: 26 plant structures; EXPRESSED DURING: 13 growth stages; CONTAINS InterPro DOMAIN/s: Membrane protein, At2g17000, predicted (InterPro:IPR016688), Mechanosensitive ion channel MscS (…
AT5G13650	SVR3	elongation factor family protein [Source:NCBI gene (formerly Entrezgene);Acc:831209]	NS	NS	NS	NS	NS	-0.589154	-0.667405	NS	NS	-0.861912	elongation factor family protein; FUNCTIONS IN: GTP binding, translation elongation factor activity, GTPase activity; LOCATED IN: chloroplast, chloroplast stroma; EXPRESSED IN: 22 plant structures; EXPRESSED DURING: 13 growth stages; CONTAINS InterPro DOMAIN/s: Small GTP-binding protein (InterPro:IPR005225), Translation elongation factor EFTu/EF1A, domain 2 (InterPro:IPR004161), Translation elong…
AT5G16990	AT5G16990	Zinc-binding dehydrogenase family protein [Source:NCBI gene (formerly Entrezgene);Acc:831562]	NS	NS	NS	NS	NS	-1.00292	-0.737963	-0.729384	NS	NS	Zinc-binding dehydrogenase family protein; FUNCTIONS IN: oxidoreductase activity, binding, zinc ion binding, catalytic activity; INVOLVED IN: response to oxidative stress; LOCATED IN: plasma membrane; EXPRESSED IN: 26 plant structures; EXPRESSED DURING: 13 growth stages; CONTAINS InterPro DOMAIN/s: GroES-like (InterPro:IPR011032), NAD(P)-binding domain (InterPro:IPR016040), Alcohol dehydrogenase,…
AT5G17000	AT5G17000	Zinc-binding dehydrogenase family protein [Source:NCBI gene (formerly Entrezgene);Acc:831563]	NS	NS	NS	NS	NS	-0.583239	NS	NS	NS	NS	Zinc-binding dehydrogenase family protein; FUNCTIONS IN: oxidoreductase activity, binding, catalytic activity, zinc ion binding; INVOLVED IN: response to oxidative stress; EXPRESSED IN: cultured cell, leaf; CONTAINS InterPro DOMAIN/s: GroES-like (InterPro:IPR011032), NAD(P)-binding domain (InterPro:IPR016040), Alcohol dehydrogenase, C-terminal (InterPro:IPR013149), Alcohol dehydrogenase superfami…
AT5G20140	HBP5	SOUL heme-binding family protein [Source:NCBI gene (formerly Entrezgene);Acc:832136]	NS	NS	NS	NS	NS	-1.02279	-0.663131	-0.724831	-0.978175	-0.869425	SOUL heme-binding family protein; FUNCTIONS IN: binding; INVOLVED IN: biological_process unknown; LOCATED IN: chloroplast thylakoid membrane, chloroplast; EXPRESSED IN: 21 plant structures; EXPRESSED DURING: 13 growth stages; CONTAINS InterPro DOMAIN/s: Protein of unknown function DUF2358 (InterPro:IPR018790), SOUL haem-binding protein (InterPro:IPR006917); BEST Arabidopsis thaliana protein match…
AT5G23310	FSD3	Fe superoxide dismutase 3 [Source:NCBI gene (formerly Entrezgene);Acc:832395]	NS	NS	NS	NS	NS	-0.968086	-0.660739	-0.812128	-1.09877	-1.12029	Fe superoxide dismutase 3 (FSD3); FUNCTIONS IN: superoxide dismutase activity; INVOLVED IN: removal of superoxide radicals; LOCATED IN: chloroplast, nucleoid; EXPRESSED IN: 21 plant structures; EXPRESSED DURING: 13 growth stages; CONTAINS InterPro DOMAIN/s: Manganese/iron superoxide dismutase, N-terminal (InterPro:IPR019831), Manganese/iron superoxide dismutase (InterPro:IPR001189), Manganese/iro…
AT5G28030	DES1	L-cysteine desulfhydrase 1 [Source:NCBI gene (formerly Entrezgene);Acc:832873]	NS	NS	NS	NS	NS	-2.29184	-1.97699	NS	-2.23573	-1.3927	L-cysteine desulfhydrase 1 (DES1); FUNCTIONS IN: pyridoxal phosphate binding, cysteine synthase activity, catalytic activity; INVOLVED IN: cysteine biosynthetic process from serine, cysteine biosynthetic process, metabolic process; EXPRESSED IN: 11 plant structures; EXPRESSED DURING: LP.04 four leaves visible, 4 anthesis, LP.02 two leaves visible, petal differentiation and expansion stage, E expa…
AT5G42980	TRX3	thioredoxin 3 [Source:NCBI gene (formerly Entrezgene);Acc:834313]	NS	NS	NS	NS	NS	-0.506737	NS	NS	NS	NS	thioredoxin 3 (TRX3); FUNCTIONS IN: oxidoreductase activity, acting on sulfur group of donors, disulfide as acceptor; INVOLVED IN: response to hydrogen peroxide, defense response to fungus, response to microbial phytotoxin; LOCATED IN: in 8 components; EXPRESSED IN: 27 plant structures; EXPRESSED DURING: 16 growth stages; CONTAINS InterPro DOMAIN/s: Thioredoxin fold (InterPro:IPR012335), Thioredo…
AT5G43750	PnsB5	NAD(P)H dehydrogenase 18 [Source:NCBI gene (formerly Entrezgene);Acc:834396]	NS	NS	NS	NS	NS	-1.71761	-1.36569	-1.18046	-1.43994	-1.4186	NAD(P)H dehydrogenase 18 (NDH18); FUNCTIONS IN: molecular_function unknown; INVOLVED IN: response to oxidative stress; LOCATED IN: chloroplast thylakoid membrane, chloroplast; EXPRESSED IN: 22 plant structures; EXPRESSED DURING: 13 growth stages; Has 30201 Blast hits to 17322 proteins in 780 species: Archae - 12; Bacteria - 1396; Metazoa - 17338; Fungi - 3422; Plants - 5037; Viruses - 0; Other Eu…
AT5G44650	CEST	death domain associated protein [Source:NCBI gene (formerly Entrezgene);Acc:834494]	NS	NS	NS	NS	NS	-1.028	-1.11572	-0.545095	-0.756934	-1.0297	CHLOROPLAST PROTEIN-ENHANCING STRESS TOLERANCE (CEST); FUNCTIONS IN: molecular_function unknown; INVOLVED IN: response to water deprivation, chloroplast organization, hyperosmotic salinity response, response to photooxidative stress, heat acclimation; LOCATED IN: thylakoid, chloroplast thylakoid membrane, chloroplast; EXPRESSED IN: 23 plant structures; EXPRESSED DURING: 13 growth stages; Has 3020…
AT5G55120	VTC5	GDP-L-galactose phosphorylase VITAMIN C DEFECTIVE 5 (VTC5) [Source:NCBI gene (formerly Entrezgene);Acc:835603]	NS	NS	NS	NS	NS	-0.452634	NS	NS	NS	-0.406233	VITAMIN C DEFECTIVE 5 (VTC5); BEST Arabidopsis thaliana protein match is: mannose-1-phosphate guanylyltransferase (GDP)s;GDP-galactose:mannose-1-phosphate guanylyltransferases;GDP-galactose:glucose-1-phosphate guanylyltransferases;GDP-galactose:myoinositol-1-phosphate guanylyltransferases;glucose-1-phosphate guanylyltransferase (GDP)s;galactose-1-phosphate guanylyltransferase (GDP)s;GDP-D-glucose…
AT5G57345	AT5G57345	transmembrane protein [Source:NCBI gene (formerly Entrezgene);Acc:835840]	NS	NS	NS	NS	NS	-0.944897	-0.536892	NS	NS	-0.405422	unknown protein; Has 30201 Blast hits to 17322 proteins in 780 species: Archae - 12; Bacteria - 1396; Metazoa - 17338; Fungi - 3422; Plants - 5037; Viruses - 0; Other Eukaryotes - 2996 (source: NCBI BLink).
AT5G63310	NDPK2	nucleoside diphosphate kinase 2 [Source:NCBI gene (formerly Entrezgene);Acc:836451]	NS	NS	NS	NS	NS	-0.942189	-0.730247	-0.779822	-1.13124	-0.818341	nucleoside diphosphate kinase 2 (NDPK2); FUNCTIONS IN: nucleoside diphosphate kinase activity, protein binding, ATP binding; INVOLVED IN: response to UV, auxin mediated signaling pathway, response to hydrogen peroxide, red, far-red light phototransduction; LOCATED IN: in 6 components; EXPRESSED IN: 25 plant structures; EXPRESSED DURING: 14 growth stages; CONTAINS InterPro DOMAIN/s: Nucleoside dip…
AT5G63980	SAL1	SAL1 phosphatase-like protein [Source:NCBI gene (formerly Entrezgene);Acc:836519]	NS	NS	NS	NS	NS	-1.15827	-0.992441	-0.664478	-1.51478	-0.819737	SAL1; FUNCTIONS IN: 3'(2'),5'-bisphosphate nucleotidase activity, nucleotide phosphatase activity, inositol or phosphatidylinositol phosphatase activity; INVOLVED IN: in 15 processes; LOCATED IN: nucleus, chloroplast, chloroplast stroma, cytoplasm; EXPRESSED IN: 23 plant structures; EXPRESSED DURING: 13 growth stages; CONTAINS InterPro DOMAIN/s: Inositol monophosphatase (InterPro:IPR000760), 3(2)…
AT5G64110	AT5G64110	Peroxidase superfamily protein [Source:NCBI gene (formerly Entrezgene);Acc:836532]	NS	NS	NS	NS	1.45598	-1.01024	NS	NS	NS	NS	Peroxidase superfamily protein; FUNCTIONS IN: peroxidase activity, heme binding; INVOLVED IN: response to oxidative stress, oxidation reduction; LOCATED IN: membrane; EXPRESSED IN: shoot apex, shoot, stamen, leaf; EXPRESSED DURING: 4 anthesis; CONTAINS InterPro DOMAIN/s: Haem peroxidase (InterPro:IPR010255), Plant peroxidase (InterPro:IPR000823), Peroxidases heam-ligand binding site (InterPro:IPR…
GO enrichment analysis
GO-BP
Enrichment FDR	nGenes	Biological Process (BP)	Pathway Genes	Fold Enrichment
2.5958e-25	16	cellular response to oxidative stress	82	86.9489
7.58329e-11	7	cellular response to reactive oxygen species	37	84.3051
3.90264e-40	26	response to reactive oxygen species	161	71.9623
2.2191e-94	57	response to oxidative stress	454	55.947
5.83973e-22	16	cellular response to chemical stress	130	54.8447
1.75762e-10	8	response to hydrogen peroxide	73	48.8343
7.23441e-15	13	cellular oxidant detoxification	176	32.9146
2.35296e-14	13	cellular detoxification	194	29.8607
2.35296e-14	13	cellular response to toxic substance	195	29.7075
4.81328e-12	13	detoxification	299	19.3745
1.10193e-12	14	response to toxic substance	340	18.3488
4.10949e-18	23	response to inorganic substance	790	12.9735
1.27814e-13	18	response to temperature stimulus	648	12.3781
1.10141e-19	31	response to oxygen-containing compound	1679	8.22752
1.08207e-16	29	cellular response to chemical stimulus	1791	7.2154
7.12718e-46	60	response to stress	3953	6.76367
7.66379e-10	19	cellular response to stress	1272	6.65617
2.15138e-27	45	response to chemical	3091	6.48741
1.52662e-15	30	response to abiotic stimulus	2170	6.16055
1.07288e-11	31	cellular response to stimulus	3315	4.16712
GO-MF
Enrichment FDR	nGenes	Molecular Function (MF)	Pathway Genes	Fold Enrichment
1.10599e-05	3	L-ascorbate peroxidase activity	8	167.105
0.0021778	2	nucleoside diphosphate kinase activity	9	99.0251
0.0021778	2	thioredoxin-disulfide reductase activity	9	99.0251
0.00218323	2	glutathione peroxidase activity	10	89.1226
0.00218323	2	superoxide dismutase activity	10	89.1226
0.00218323	2	oxidoreductase activity acting on superoxide radicals as	10	89.1226
0.00248819	2	peroxiredoxin activity	11	81.0205
9.29095e-06	4	salicylic acid binding	28	63.659
1.27275e-06	5	oxidoreductase activity acting on a sulfur group of dono	45	49.5125
1.06433e-14	13	antioxidant activity	167	34.6884
7.51697e-07	6	protein-disulfide reductase activity	79	33.844
9.34061e-07	6	disulfide oxidoreductase activity	84	31.8295
1.30217e-09	9	peroxidase activity	136	29.4891
1.5364e-09	9	oxidoreductase activity acting on peroxide as acceptor	143	28.0456
1.83659e-08	8	oxidoreductase activity acting on a sulfur group of dono	129	27.6349
0.000317247	4	monocarboxylic acid binding	70	25.4636
0.00148338	4	organic acid binding	106	16.8156
0.00163702	4	carboxylic acid binding	111	16.0581
1.61622e-13	25	oxidoreductase activity	1598	6.97142
0.00218323	6	heme binding	385	6.94462
GO-CC
Enrichment FDR	nGenes	Cellular Component (CC)	Pathway Genes	Fold Enrichment
0.0153141	2	stromule	39	22.8519
1.30782e-06	11	thylakoid	602	8.14243
2.44427e-07	13	chloroplast stroma	767	7.55276
2.44427e-07	13	plastid stroma	774	7.48445
0.00222911	6	chloroplast thylakoid membrane	423	6.32075
0.00222911	6	plastid thylakoid membrane	425	6.29101
0.00253729	6	thylakoid membrane	445	6.00826
0.00121294	7	chloroplast thylakoid	520	5.99864
0.00253729	6	photosynthetic membrane	446	5.99479
0.00121294	7	plastid thylakoid	522	5.97565
0.000222418	9	chloroplast envelope	701	5.72114
2.2989e-05	12	plastid envelope	995	5.37423
1.59001e-10	26	chloroplast	2403	4.82145
0.00401274	7	plastid membrane	682	4.57374
1.59001e-10	28	plastid	2910	4.28768
4.97287e-05	14	organelle envelope	1515	4.11788
4.97287e-05	14	envelope	1515	4.11788
7.08116e-08	24	cytosol	2789	3.8346
0.00150867	13	mitochondrion	1874	3.09123
0.00443124	17	cell periphery	3381	2.24059
Transcription factor enrichment analysis
TF-AGRIS
Enrichment FDR	nGenes	Transcription Factor Binding Motif	Pathway Genes	Fold Enrichment
NS

## Sheet: Group V-OS
GO- and Transcription Factor- Enrichment analyses of group-VOS genes			DEG Expcression log2 FC (FL/GC)
Gene Annotation			Root	adc1-R	OXPtADC-R	cdr7/cuao3-R	OXCuAO3-R	Shoot	adc1-S	OXPtADC-S	cdr7/cuao3-S	OXCuAO3-S	Annotation
Gene ID	Symbol	Description	Col	adc1	OXPtADC	cdr7/cuao3	OXCuAO3	Col	adc1	OXPtADC	cdr7/cuao3	OXCuAO3
AT1G15520	ABCG40	pleiotropic drug resistance 12 [Source:NCBI gene (formerly Entrezgene);Acc:838122]	0.971127	NS	NS	NS	1.28927	NS	NS	NS	NS	1.75687	pleiotropic drug resistance 12 (PDR12); CONTAINS InterPro DOMAIN/s: ATPase, AAA+ type, core (InterPro:IPR003593), ABC transporter-like (InterPro:IPR003439), Plant PDR ABC transporter associated (InterPro:IPR013581), ABC-2 type transporter (InterPro:IPR013525); BEST Arabidopsis thaliana protein match is: pleiotropic drug resistance 11 (TAIR:AT1G66950.1); Has 377983 Blast hits to 279992 proteins in…
AT1G34510	AT1G34510	Peroxidase superfamily protein [Source:NCBI gene (formerly Entrezgene);Acc:840353]	1.84256	NS	2.19683	NS	2.37861	NS	NS	NS	NS	NS	Peroxidase superfamily protein; FUNCTIONS IN: peroxidase activity, heme binding; INVOLVED IN: oxidation reduction, response to oxidative stress; LOCATED IN: endomembrane system; EXPRESSED IN: root; CONTAINS InterPro DOMAIN/s: Haem peroxidase (InterPro:IPR010255), Plant peroxidase (InterPro:IPR000823), Peroxidase, active site (InterPro:IPR019794), Haem peroxidase, plant/fungal/bacterial (InterPro:…
AT1G60740	AT1G60740	Thioredoxin superfamily protein [Source:NCBI gene (formerly Entrezgene);Acc:842368]	1.32175	NS	NS	NS	NS	NS	NS	NS	NS	NS	Thioredoxin superfamily protein; FUNCTIONS IN: oxidoreductase activity, antioxidant activity; INVOLVED IN: cell redox homeostasis; LOCATED IN: plasma membrane; EXPRESSED IN: male gametophyte, cultured cell, pollen tube, leaf; EXPRESSED DURING: L mature pollen stage, M germinated pollen stage; CONTAINS InterPro DOMAIN/s: Thioredoxin fold (InterPro:IPR012335), Thioredoxin-like (InterPro:IPR017936),…
AT1G71695	AT1G71695	Peroxidase superfamily protein [Source:NCBI gene (formerly Entrezgene);Acc:843498]	0.745981	0.94099	NS	NS	NS	NS	NS	NS	NS	-0.414532	Peroxidase superfamily protein; FUNCTIONS IN: peroxidase activity, heme binding; INVOLVED IN: response to oxidative stress, oxidation reduction; LOCATED IN: cell wall, vacuole, membrane, plant-type cell wall; EXPRESSED IN: 23 plant structures; EXPRESSED DURING: 13 growth stages; CONTAINS InterPro DOMAIN/s: Haem peroxidase (InterPro:IPR010255), Plant peroxidase (InterPro:IPR000823), Peroxidases he…
AT3G01420	DOX1	Peroxidase superfamily protein [Source:NCBI gene (formerly Entrezgene);Acc:821135]	0.910521	1.19252	-0.716495	NS	0.947792	NS	0.980253	-1.07888	NS	NS	DOX1; FUNCTIONS IN: lipoxygenase activity; INVOLVED IN: in 6 processes; LOCATED IN: endomembrane system; EXPRESSED IN: 9 plant structures; EXPRESSED DURING: 4 anthesis; CONTAINS InterPro DOMAIN/s: Haem peroxidase (InterPro:IPR010255), Haem peroxidase, animal (InterPro:IPR002007); BEST Arabidopsis thaliana protein match is: alpha dioxygenase (TAIR:AT1G73680.1); Has 1465 Blast hits to 1381 proteins…
AT3G13610	AT3G13610	2-oxoglutarate (2OG) and Fe(II)-dependent oxygenase superfamily protein [Source:NCBI gene (formerly Entrezgene);Acc:820564]	0.643669	NS	NS	NS	NS	NS	NS	NS	NS	NS	2-oxoglutarate (2OG) and Fe(II)-dependent oxygenase superfamily protein; CONTAINS InterPro DOMAIN/s: Oxoglutarate/iron-dependent oxygenase (InterPro:IPR005123); BEST Arabidopsis thaliana protein match is: 2-oxoglutarate (2OG) and Fe(II)-dependent oxygenase superfamily protein (TAIR:AT1G55290.1); Has 8779 Blast hits to 8731 proteins in 1013 species: Archae - 0; Bacteria - 1145; Metazoa - 121; Fung…
AT3G17790	PAP17	purple acid phosphatase 17 [Source:NCBI gene (formerly Entrezgene);Acc:821047]	1.84559	1.92268	1.36878	NS	2.15472	NS	NS	0.752529	NS	0.63644	purple acid phosphatase 17 (PAP17); CONTAINS InterPro DOMAIN/s: Metallophosphoesterase (InterPro:IPR004843); BEST Arabidopsis thaliana protein match is: purple acid phosphatase 3 (TAIR:AT1G14700.1); Has 1229 Blast hits to 1218 proteins in 312 species: Archae - 4; Bacteria - 345; Metazoa - 336; Fungi - 8; Plants - 191; Viruses - 0; Other Eukaryotes - 345 (source: NCBI BLink).
AT4G11170	AT4G11170	Disease resistance protein (TIR-NBS-LRR class) family [Source:NCBI gene (formerly Entrezgene);Acc:826718]	1.27083	2.63359	NS	NS	1.584	NS	NS	NS	NS	NS	Disease resistance protein (TIR-NBS-LRR class) family; FUNCTIONS IN: transmembrane receptor activity, nucleoside-triphosphatase activity, nucleotide binding, ATP binding; INVOLVED IN: defense response, response to ozone; LOCATED IN: mitochondrion; EXPRESSED IN: stem, root, stamen; EXPRESSED DURING: 4 anthesis; CONTAINS InterPro DOMAIN/s: ATPase, AAA+ type, core (InterPro:IPR003593), NB-ARC (Inter…
AT4G11290	AT4G11290	Peroxidase superfamily protein [Source:NCBI gene (formerly Entrezgene);Acc:826731]	0.57277	NS	0.892539	NS	0.645692	NS	NS	NS	NS	NS	Peroxidase superfamily protein; FUNCTIONS IN: peroxidase activity, heme binding; INVOLVED IN: response to oxidative stress, oxidation reduction; LOCATED IN: endomembrane system; EXPRESSED IN: 11 plant structures; EXPRESSED DURING: 7 growth stages; CONTAINS InterPro DOMAIN/s: Haem peroxidase (InterPro:IPR010255), Plant peroxidase (InterPro:IPR000823), Peroxidases heam-ligand binding site (InterPro…
AT4G14030	SBP1	selenium-binding protein 1 [Source:NCBI gene (formerly Entrezgene);Acc:827039]	0.3139	NS	NS	NS	NS	NS	NS	NS	NS	NS	selenium-binding protein 1 (SBP1); FUNCTIONS IN: selenium binding; INVOLVED IN: response to cadmium ion, response to hydrogen peroxide, cellular response to selenium ion, sulfate assimilation; LOCATED IN: cellular_component unknown; EXPRESSED IN: guard cell, cultured cell, leaf; EXPRESSED DURING: seedling growth; CONTAINS InterPro DOMAIN/s: Cytochrome cd1-nitrite reductase-like, C-terminal haem d…
AT5G19890	AT5G19890	Peroxidase superfamily protein [Source:NCBI gene (formerly Entrezgene);Acc:832111]	2.10315	NS	2.14623	NS	1.16867	NS	NS	NS	NS	NS	Peroxidase superfamily protein; FUNCTIONS IN: peroxidase activity, heme binding; INVOLVED IN: oxidation reduction, response to oxidative stress; LOCATED IN: nucleus, cytoplasm; EXPRESSED IN: 17 plant structures; EXPRESSED DURING: 10 growth stages; CONTAINS InterPro DOMAIN/s: Haem peroxidase (InterPro:IPR010255), Plant peroxidase (InterPro:IPR000823), Peroxidases heam-ligand binding site (InterPro…
AT5G21940	AT5G21940	hybrid signal transduction histidine kinase M-like protein [Source:NCBI gene (formerly Entrezgene);Acc:832254]	0.858364	1.39012	0.915825	NS	1.31121	NS	1.90615	NS	1.35037	1.87718	unknown protein; BEST Arabidopsis thaliana protein match is: unknown protein (TAIR:AT3G43850.1); Has 30201 Blast hits to 17322 proteins in 780 species: Archae - 12; Bacteria - 1396; Metazoa - 17338; Fungi - 3422; Plants - 5037; Viruses - 0; Other Eukaryotes - 2996 (source: NCBI BLink).
AT5G25620	YUC6	Flavin-binding monooxygenase family protein [Source:NCBI gene (formerly Entrezgene);Acc:832638]	0.447934	NS	NS	0.531655	NS	NS	NS	NS	NS	-1.06174	YUCCA6 (YUC6); FUNCTIONS IN: NADP or NADPH binding, oxidoreductase activity, monooxygenase activity, FAD binding, flavin-containing monooxygenase activity; INVOLVED IN: auxin biosynthetic process; EXPRESSED IN: sepal; EXPRESSED DURING: petal differentiation and expansion stage; CONTAINS InterPro DOMAIN/s: Pyridine nucleotide-disulphide oxidoreductase, class-II (InterPro:IPR000103), FAD-dependent …
AT5G58940	CRCK1	calmodulin-binding receptor-like cytoplasmic kinase 1 [Source:NCBI gene (formerly Entrezgene);Acc:836011]	0.552527	NS	NS	NS	NS	NS	NS	NS	NS	NS	calmodulin-binding receptor-like cytoplasmic kinase 1 (CRCK1); FUNCTIONS IN: protein serine/threonine kinase activity, protein kinase activity, kinase activity, ATP binding; INVOLVED IN: protein amino acid phosphorylation; LOCATED IN: cellular_component unknown; EXPRESSED IN: 7 plant structures; EXPRESSED DURING: LP.06 six leaves visible, LP.04 four leaves visible, 4 anthesis; CONTAINS InterPro D…
GO enrichment analysis
GO-BP
Enrichment FDR	nGenes	Biological Process (BP)	Pathway Genes	Fold Enrichment
6.4e-07	4	Response to hydrogen peroxide	73	108.1
2.5e-08	5	Hydrogen peroxide catabolic proc.	99	99.7
4.8e-11	7	Response to reactive oxygen species	161	85.8
6.5e-08	5	Hydrogen peroxide metabolic proc.	122	80.9
0.00011	3	Cellular response to oxidative stress	82	72.2
6.4e-09	6	Cellular oxidant detoxification	176	67.3
8.9e-09	6	Cellular detoxification	194	61
1.9e-23	14	Response to oxidative stress	454	60.9
8.9e-09	6	Cellular response to toxic substance	195	60.7
5.4e-07	5	Reactive oxygen species metabolic proc.	199	49.6
0.00041	3	Cellular response to chemical stress	130	45.5
8.4e-08	6	Detoxification	299	39.6
9.3e-10	9	Response to inorganic substance	790	22.5
4.9e-07	9	Cellular response to chemical stimulus	1791	9.9
5e-06	8	Response to oxygen-containing compound	1679	9.4
5.1e-12	14	Response to chemical	3091	8.9
0.00052	6	Cellular catabolic proc.	1478	8
8e-11	14	Response to stress	3953	7
5e-06	10	Cellular response to stimulus	3315	6
GO-MF
Enrichment FDR	nGenes	Molecular Function (MF)	Pathway Genes	Fold Enrichment
0.012	1	Selenium binding	3	657.8
0.026	1	Thioredoxin peroxidase activity	8	246.7
0.029	1	Ferric iron binding	11	179.4
0.029	1	Peroxiredoxin activity	11	179.4
0.029	1	Indole-3-pyruvate monooxygenase activity	11	179.4
0.032	1	Efflux transmembrane transporter activity	13	151.8
0.041	1	Protein-disulfide reductase (NAD(P)) activity	18	109.6
0.043	1	Ferrous iron binding	20	98.7
0.044	1	Oxidoreductase activity acting on a sulfur group of donors NAD(P) as	22	89.7
1.8e-09	6	Peroxidase activity	136	87.1
1.8e-09	6	Oxidoreductase activity acting on peroxide as acceptor	143	82.8
0.049	1	N,N-dimethylaniline monooxygenase activity	27	73.1
3.1e-09	6	Antioxidant activity	167	70.9
0.049	1	NAD+ nucleosidase activity	30	65.8
0.018	2	Dioxygenase activity	147	26.8
1.3e-05	5	Heme binding	385	25.6
1.7e-05	5	Tetrapyrrole binding	421	23.4
2e-07	9	Oxidoreductase activity	1598	11.1
0.012	7	Metal ion binding	3803	3.6
0.012	7	Cation binding	3824	3.6
GO-CC
Enrichment FDR	nGenes	Cellular Component (CC)	Pathway Genes	Fold Enrichment
0.027	1	Cell surface	11	179.4
0.044	1	Monolayer-surrounded lipid storage body	22	89.7
0.01	3	Plant-type cell wall	386	15.3
0.01	3	Cell wall	421	14.1
0.01	3	External encapsulating structure	450	13.2
0.01	5	Extracellular region	1876	5.3
Transcription factor enrichment analysis
TF-AGRIS
Enrichment FDR	nGenes	Transcription Factor Binding Motif	Pathway Genes	Fold Enrichment
NS

## Sheet: Group VI-OS
GO- and Transcription Factor- Enrichment analyses of group-VIOS genes			DEG Expcression log2 FC (FL/GC)
Gene Annotation			Root	adc1-R	OXPtADC-R	cdr7/cuao3-R	OXCuAO3-R	Shoot	adc1-S	OXPtADC-S	cdr7/cuao3-S	OXCuAO3-S	Annotation
Gene ID	Symbol	Description	Col	adc1	OXPtADC	cdr7/cuao3	OXCuAO3	Col	adc1	OXPtADC	cdr7/cuao3	OXCuAO3
AT1G07530	SCL14	SCARECROW-like 14 [Source:NCBI gene (formerly Entrezgene);Acc:837267]	NS	NS	NS	NS	NS	0.590837	0.553014	NS	0.714186	0.776592	SCARECROW-like 14 (SCL14); CONTAINS InterPro DOMAIN/s: Transcription factor GRAS (InterPro:IPR005202); BEST Arabidopsis thaliana protein match is: GRAS family transcription factor (TAIR:AT2G29060.1); Has 2535 Blast hits to 2449 proteins in 301 species: Archae - 0; Bacteria - 12; Metazoa - 27; Fungi - 4; Plants - 2483; Viruses - 0; Other Eukaryotes - 9 (source: NCBI BLink).
AT1G09970	LRR XI-23	Leucine-rich receptor-like protein kinase family protein [Source:NCBI gene (formerly Entrezgene);Acc:837531]	NS	NS	NS	NS	NS	0.794763	0.77732	NS	0.813788	0.891105	LRR XI-23; FUNCTIONS IN: protein serine/threonine kinase activity, protein kinase activity, kinase activity, ATP binding; INVOLVED IN: protein amino acid phosphorylation, transmembrane receptor protein tyrosine kinase signaling pathway, protein amino acid autophosphorylation; LOCATED IN: plasma membrane; EXPRESSED IN: 22 plant structures; EXPRESSED DURING: 14 growth stages; CONTAINS InterPro DOMA…
AT1G15380	GLYI4	Lactoylglutathione lyase / glyoxalase I family protein [Source:NCBI gene (formerly Entrezgene);Acc:838107]	NS	NS	NS	NS	NS	1.23081	1.14533	NS	1.33001	1.29319	Lactoylglutathione lyase / glyoxalase I family protein; CONTAINS InterPro DOMAIN/s: Glyoxalase/bleomycin resistance protein/dioxygenase (InterPro:IPR004360); BEST Arabidopsis thaliana protein match is: Lactoylglutathione lyase / glyoxalase I family protein (TAIR:AT1G80160.1); Has 780 Blast hits to 780 proteins in 276 species: Archae - 1; Bacteria - 484; Metazoa - 4; Fungi - 2; Plants - 222; Virus…
AT1G27510	EX2	UvrB/UvrC domain protein (DUF3506) [Source:NCBI gene (formerly Entrezgene);Acc:839642]	NS	NS	NS	NS	NS	0.428431	0.403558	NS	0.416719	NS	FUNCTIONS IN: DNA binding, nuclease activity; INVOLVED IN: response to singlet oxygen; LOCATED IN: thylakoid membrane; EXPRESSED IN: 22 plant structures; EXPRESSED DURING: 13 growth stages; CONTAINS InterPro DOMAIN/s: Protein of unknown function DUF3506 (InterPro:IPR021894), UvrB/UvrC protein (InterPro:IPR001943); BEST Arabidopsis thaliana protein match is: Protein of unknown function (DUF3506) (…
AT1G34370	STOP1	C2H2 and C2HC zinc fingers superfamily protein [Source:NCBI gene (formerly Entrezgene);Acc:840339]	NS	NS	NS	NS	NS	1.22001	1.28372	1.02746	1.25004	1.17276	sensitive to proton rhizotoxicity 1 (STOP1); CONTAINS InterPro DOMAIN/s: Zinc finger, C2H2-like (InterPro:IPR015880), Zinc finger, C2H2-type (InterPro:IPR007087); BEST Arabidopsis thaliana protein match is: C2H2 and C2HC zinc fingers superfamily protein (TAIR:AT5G22890.1); Has 25295 Blast hits to 14002 proteins in 194 species: Archae - 0; Bacteria - 2; Metazoa - 23814; Fungi - 97; Plants - 697; V…
AT1G49540	ELP2	elongator protein 2 [Source:NCBI gene (formerly Entrezgene);Acc:841378]	NS	NS	NS	NS	NS	0.775006	0.456854	NS	NS	NS	elongator protein 2 (ELP2); CONTAINS InterPro DOMAIN/s: WD40 repeat 2 (InterPro:IPR019782), WD40 repeat, conserved site (InterPro:IPR019775), WD40 repeat (InterPro:IPR001680), G-protein beta WD-40 repeat, region (InterPro:IPR020472), WD40 repeat-like-containing domain (InterPro:IPR011046), WD40-repeat-containing domain (InterPro:IPR017986), WD40/YVTN repeat-like-containing domain (InterPro:IPR015…
AT1G52200	AT1G52200	PLAC8 family protein [Source:NCBI gene (formerly Entrezgene);Acc:841650]	NS	NS	NS	NS	NS	1.86607	2.33984	1.72384	2.47363	2.74453	PLAC8 family protein; FUNCTIONS IN: molecular_function unknown; INVOLVED IN: response to oxidative stress; LOCATED IN: plasma membrane; EXPRESSED IN: 10 plant structures; EXPRESSED DURING: 6 growth stages; CONTAINS InterPro DOMAIN/s: Protein of unknown function Cys-rich (InterPro:IPR006461); BEST Arabidopsis thaliana protein match is: PLAC8 family protein (TAIR:AT3G18450.1); Has 632 Blast hits to…
AT1G73120	AT1G73120	F-box/RNI superfamily protein [Source:NCBI gene (formerly Entrezgene);Acc:843643]	NS	NS	NS	NS	NS	2.14767	2.71315	2.15777	NS	NS	unknown protein; FUNCTIONS IN: molecular_function unknown; INVOLVED IN: response to oxidative stress; EXPRESSED IN: root, cultured cell; Has 36 Blast hits to 36 proteins in 8 species: Archae - 0; Bacteria - 0; Metazoa - 0; Fungi - 0; Plants - 36; Viruses - 0; Other Eukaryotes - 0 (source: NCBI BLink).
AT2G19810	OZF1	CCCH-type zinc finger family protein [Source:NCBI gene (formerly Entrezgene);Acc:816500]	NS	NS	NS	NS	0.946397	1.18757	1.88959	NS	1.03583	1.65415	CCCH-type zinc finger family protein; CONTAINS InterPro DOMAIN/s: Zinc finger, CCCH-type (InterPro:IPR000571); BEST Arabidopsis thaliana protein match is: Zinc finger C-x8-C-x5-C-x3-H type family protein (TAIR:AT4G29190.1); Has 721 Blast hits to 690 proteins in 126 species: Archae - 0; Bacteria - 0; Metazoa - 152; Fungi - 6; Plants - 412; Viruses - 0; Other Eukaryotes - 151 (source: NCBI BLink).
AT2G23140	PUB4	RING/U-box superfamily protein with ARM repeat domain-containing protein [Source:NCBI gene (formerly Entrezgene);Acc:816846]	NS	NS	NS	NS	NS	0.633303	0.695045	NS	0.525821	0.465569	RING/U-box superfamily protein with ARM repeat domain; FUNCTIONS IN: ubiquitin-protein ligase activity, binding; INVOLVED IN: protein ubiquitination; LOCATED IN: ubiquitin ligase complex; EXPRESSED IN: male gametophyte, cultured cell, pollen tube; EXPRESSED DURING: L mature pollen stage, M germinated pollen stage; CONTAINS InterPro DOMAIN/s: U box domain (InterPro:IPR003613), Armadillo-like helic…
AT2G37130	AT2G37130	Peroxidase superfamily protein [Source:NCBI gene (formerly Entrezgene);Acc:818289]	NS	NS	NS	NS	NS	2.29342	1.55337	2.35144	2.13301	2.52115	Peroxidase superfamily protein; FUNCTIONS IN: peroxidase activity, heme binding; INVOLVED IN: defense response to fungus; LOCATED IN: endomembrane system; EXPRESSED IN: 15 plant structures; EXPRESSED DURING: 7 growth stages; CONTAINS InterPro DOMAIN/s: Haem peroxidase (InterPro:IPR010255), Plant peroxidase (InterPro:IPR000823), Haem peroxidase, plant/fungal/bacterial (InterPro:IPR002016); BEST Ar…
AT2G43790	MPK6	MAP kinase 6 [Source:NCBI gene (formerly Entrezgene);Acc:818982]	NS	NS	NS	NS	NS	0.746023	0.5545	NS	0.445561	0.469723	MAP kinase 6 (MPK6); FUNCTIONS IN: MAP kinase activity, kinase activity; INVOLVED IN: in 20 processes; LOCATED IN: trans-Golgi network, preprophase band, phragmoplast; EXPRESSED IN: 27 plant structures; EXPRESSED DURING: 15 growth stages; CONTAINS InterPro DOMAIN/s: Protein kinase, ATP binding site (InterPro:IPR017441), JNK MAP kinase (InterPro:IPR008351), Serine/threonine-protein kinase domain (…
AT3G02860	AT3G02860	zinc ion binding protein [Source:NCBI gene (formerly Entrezgene);Acc:821212]	NS	NS	NS	NS	NS	0.565218	NS	NS	NS	NS	zinc ion binding; FUNCTIONS IN: zinc ion binding; INVOLVED IN: biological_process unknown; LOCATED IN: intracellular; EXPRESSED IN: 13 plant structures; EXPRESSED DURING: 4 anthesis, F mature embryo stage, petal differentiation and expansion stage, E expanded cotyledon stage, D bilateral stage; CONTAINS InterPro DOMAIN/s: Zinc finger, C2H2-like (InterPro:IPR015880); Has 2320 Blast hits to 1846 pr…
AT3G05970	LACS6	long-chain acyl-CoA synthetase 6 [Source:NCBI gene (formerly Entrezgene);Acc:819767]	NS	NS	NS	NS	NS	0.446896	NS	NS	NS	0.394979	long-chain acyl-CoA synthetase 6 (LACS6); FUNCTIONS IN: long-chain fatty acid-CoA ligase activity; INVOLVED IN: long-chain fatty acid metabolic process; LOCATED IN: membrane; EXPRESSED IN: 24 plant structures; EXPRESSED DURING: 16 growth stages; CONTAINS InterPro DOMAIN/s: AMP-binding, conserved site (InterPro:IPR020845), AMP-dependent synthetase/ligase (InterPro:IPR000873); BEST Arabidopsis thal…
AT3G06590	AT3G06590	basic helix-loop-helix (bHLH) DNA-binding superfamily protein [Source:NCBI gene (formerly Entrezgene);Acc:819838]	NS	NS	NS	NS	NS	0.775967	0.492293	0.608282	0.396126	NS	basic helix-loop-helix (bHLH) DNA-binding superfamily protein; FUNCTIONS IN: sequence-specific DNA binding transcription factor activity; INVOLVED IN: regulation of transcription; LOCATED IN: nucleus, chloroplast; EXPRESSED IN: 22 plant structures; EXPRESSED DURING: 13 growth stages; CONTAINS InterPro DOMAIN/s: Helix-loop-helix DNA-binding domain (InterPro:IPR001092), Helix-loop-helix DNA-binding…
AT3G08670	AT3G08670	serine/arginine repetitive matrix-like protein [Source:NCBI gene (formerly Entrezgene);Acc:820014]	NS	NS	NS	NS	NS	0.896817	NS	0.734146	NS	NS	unknown protein; BEST Arabidopsis thaliana protein match is: unknown protein (TAIR:AT3G51540.1); Has 48380 Blast hits to 29827 proteins in 1356 species: Archae - 46; Bacteria - 5589; Metazoa - 17361; Fungi - 13192; Plants - 2237; Viruses - 905; Other Eukaryotes - 9050 (source: NCBI BLink).
AT3G10020	AT3G10020	plant/protein [Source:NCBI gene (formerly Entrezgene);Acc:820163]	NS	NS	NS	0.783355	NS	1.00945	1.57589	1.19144	1.02209	1.88279	unknown protein; FUNCTIONS IN: molecular_function unknown; INVOLVED IN: response to oxidative stress, anaerobic respiration; LOCATED IN: cellular_component unknown; EXPRESSED IN: 23 plant structures; EXPRESSED DURING: 13 growth stages; Has 47 Blast hits to 47 proteins in 12 species: Archae - 0; Bacteria - 0; Metazoa - 1; Fungi - 0; Plants - 46; Viruses - 0; Other Eukaryotes - 0 (source: NCBI BLin…
AT3G21650	AT3G21650	Protein phosphatase 2A regulatory B subunit family protein [Source:NCBI gene (formerly Entrezgene);Acc:821719]	NS	NS	NS	NS	NS	0.616177	NS	NS	NS	0.537856	Protein phosphatase 2A regulatory B subunit family protein; FUNCTIONS IN: protein phosphatase type 2A regulator activity; INVOLVED IN: signal transduction; LOCATED IN: mitochondrion, protein phosphatase type 2A complex; EXPRESSED IN: 22 plant structures; EXPRESSED DURING: 14 growth stages; CONTAINS InterPro DOMAIN/s: Protein phosphatase 2A, regulatory B subunit, B56 (InterPro:IPR002554); BEST Ara…
AT3G22380	TIC	time for coffee [Source:NCBI gene (formerly Entrezgene);Acc:821807]	NS	NS	NS	NS	NS	0.730964	0.387915	NS	NS	NS	TIME FOR COFFEE (TIC); BEST Arabidopsis thaliana protein match is: TIC-like (TAIR:AT3G63180.1); Has 35078 Blast hits to 21616 proteins in 942 species: Archae - 10; Bacteria - 2414; Metazoa - 18018; Fungi - 6283; Plants - 1621; Viruses - 189; Other Eukaryotes - 6543 (source: NCBI BLink).
AT3G29035	NAC3	NAC domain containing protein 3 [Source:NCBI gene (formerly Entrezgene);Acc:822547]	NS	NS	NS	NS	NS	1.44517	1.846	2.00211	1.16057	1.8265	NAC domain containing protein 3 (NAC3); CONTAINS InterPro DOMAIN/s: No apical meristem (NAM) protein (InterPro:IPR003441); BEST Arabidopsis thaliana protein match is: NAC domain containing protein 6 (TAIR:AT5G39610.1); Has 2988 Blast hits to 2981 proteins in 79 species: Archae - 0; Bacteria - 0; Metazoa - 0; Fungi - 0; Plants - 2988; Viruses - 0; Other Eukaryotes - 0 (source: NCBI BLink).
AT3G30775	ERD5	Methylenetetrahydrofolate reductase family protein [Source:NCBI gene (formerly Entrezgene);Acc:822833]	NS	0.56469	NS	0.950869	0.717196	1.58913	1.45643	0.994224	1.68695	1.21063	EARLY RESPONSIVE TO DEHYDRATION 5 (ERD5); CONTAINS InterPro DOMAIN/s: Proline dehydrogenase (InterPro:IPR002872), Proline oxidase (InterPro:IPR015659); BEST Arabidopsis thaliana protein match is: Methylenetetrahydrofolate reductase family protein (TAIR:AT5G38710.1); Has 2269 Blast hits to 2250 proteins in 878 species: Archae - 1; Bacteria - 1355; Metazoa - 205; Fungi - 217; Plants - 85; Viruses -…
AT3G49120	PRXCB	peroxidase CB [Source:NCBI gene (formerly Entrezgene);Acc:824073]	NS	NS	NS	NS	NS	0.486394	NS	NS	NS	0.668664	peroxidase CB (PRXCB); FUNCTIONS IN: peroxidase activity; INVOLVED IN: oxygen and reactive oxygen species metabolic process, response to light stimulus, defense response to bacterium, defense response to fungus, unidimensional cell growth; LOCATED IN: apoplast, cell wall, plasma membrane, vacuole, plant-type cell wall; EXPRESSED IN: stem, root, guard cell, cultured cell, leaf; EXPRESSED DURING: s…
AT3G56090	FER3	ferritin 3 [Source:NCBI gene (formerly Entrezgene);Acc:824775]	NS	NS	NS	NS	NS	0.674996	0.573785	NS	NS	NS	ferritin 3 (FER3); FUNCTIONS IN: oxidoreductase activity, ferric iron binding, binding, transition metal ion binding; INVOLVED IN: in 8 processes; LOCATED IN: chloroplast, membrane, chloroplast envelope; EXPRESSED IN: 23 plant structures; EXPRESSED DURING: 14 growth stages; CONTAINS InterPro DOMAIN/s: Ferritin, N-terminal (InterPro:IPR001519), Ferritin-related (InterPro:IPR012347), Ferritin-like …
AT3G60980	AT3G60980	Tetratricopeptide repeat (TPR)-like superfamily protein [Source:NCBI gene (formerly Entrezgene);Acc:825270]	NS	NS	NS	NS	NS	0.701114	NS	NS	0.728613	0.597763	Tetratricopeptide repeat (TPR)-like superfamily protein; CONTAINS InterPro DOMAIN/s: Pentatricopeptide repeat (InterPro:IPR002885); BEST Arabidopsis thaliana protein match is: glutamine-rich protein 23 (TAIR:AT1G10270.1); Has 2028 Blast hits to 1422 proteins in 60 species: Archae - 0; Bacteria - 0; Metazoa - 0; Fungi - 0; Plants - 2019; Viruses - 0; Other Eukaryotes - 9 (source: NCBI BLink).
AT3G62770	AtATG18a	Transducin/WD40 repeat-like superfamily protein [Source:NCBI gene (formerly Entrezgene);Acc:825452]	NS	NS	NS	NS	NS	1.1915	0.630776	0.824471	0.86677	1.05388	AtATG18a; FUNCTIONS IN: molecular_function unknown; INVOLVED IN: autophagy, leaf senescence, response to starvation; LOCATED IN: chloroplast; EXPRESSED IN: 23 plant structures; EXPRESSED DURING: 15 growth stages; CONTAINS InterPro DOMAIN/s: WD40 repeat-like-containing domain (InterPro:IPR011046), WD40 repeat (InterPro:IPR001680), WD40/YVTN repeat-like-containing domain (InterPro:IPR015943), WD40 …
AT3G63080	GPX5	glutathione peroxidase 5 [Source:NCBI gene (formerly Entrezgene);Acc:825483]	NS	NS	NS	NS	NS	0.567475	NS	NS	0.733893	0.79426	glutathione peroxidase 5 (GPX5); FUNCTIONS IN: glutathione peroxidase activity; INVOLVED IN: N-terminal protein myristoylation, embryo development ending in seed dormancy; LOCATED IN: endoplasmic reticulum, plasma membrane; EXPRESSED IN: 24 plant structures; EXPRESSED DURING: 15 growth stages; CONTAINS InterPro DOMAIN/s: Thioredoxin fold (InterPro:IPR012335), Thioredoxin-like fold (InterPro:IPR01…
AT4G08920	CRY1	cryptochrome 1 [Source:NCBI gene (formerly Entrezgene);Acc:826470]	NS	NS	NS	NS	NS	0.384196	0.441159	NS	NS	0.67171	cryptochrome 1 (CRY1); CONTAINS InterPro DOMAIN/s: Rossmann-like alpha/beta/alpha sandwich fold (InterPro:IPR014729), Cryptochrome/DNA photolyase, class 1 conserved site, C-terminal (InterPro:IPR018394), DNA photolyase, N-terminal (InterPro:IPR006050), Cryptochrome C-terminal (InterPro:IPR020978), DNA photolyase, FAD-binding/Cryptochrome, C-terminal (InterPro:IPR005101), Cryptochrome, plant (Inte…
AT4G11830	PLDGAMMA2	phospholipase D gamma 2 [Source:NCBI gene (formerly Entrezgene);Acc:826789]	NS	NS	NS	NS	NS	0.591633	NS	NS	0.611235	NS	phospholipase D gamma 2 (PLDGAMMA2); FUNCTIONS IN: phospholipase D activity; INVOLVED IN: phospholipid catabolic process; LOCATED IN: cytosolic ribosome, chloroplast; EXPRESSED IN: 23 plant structures; EXPRESSED DURING: 13 growth stages; CONTAINS InterPro DOMAIN/s: C2 membrane targeting protein (InterPro:IPR018029), C2 calcium/lipid-binding domain, CaLB (InterPro:IPR008973), Phospholipase D (Inte…
AT4G13540	AT4G13540	golgin family A protein [Source:NCBI gene (formerly Entrezgene);Acc:826986]	NS	NS	NS	NS	NS	1.17841	NS	NS	NS	NS	unknown protein; INVOLVED IN: N-terminal protein myristoylation; BEST Arabidopsis thaliana protein match is: unknown protein (TAIR:AT3G23930.1); Has 4658 Blast hits to 3455 proteins in 431 species: Archae - 39; Bacteria - 387; Metazoa - 1842; Fungi - 436; Plants - 133; Viruses - 38; Other Eukaryotes - 1783 (source: NCBI BLink).
AT4G17070	AT4G17070	peptidyl-prolyl cis-trans isomerase [Source:NCBI gene (formerly Entrezgene);Acc:827415]	NS	NS	NS	NS	NS	1.37951	1.35253	0.813482	1.3911	1.41319	peptidyl-prolyl cis-trans isomerases; FUNCTIONS IN: peptidyl-prolyl cis-trans isomerase activity; INVOLVED IN: response to oxidative stress; EXPRESSED IN: 24 plant structures; EXPRESSED DURING: 15 growth stages; CONTAINS InterPro DOMAIN/s: Cyclophilin-like (InterPro:IPR015891), Peptidyl-prolyl cis-trans isomerase, cyclophilin-type (InterPro:IPR002130); Has 214 Blast hits to 208 proteins in 48 spe…
AT4G20380	LSD1	LSD1 zinc finger family protein [Source:NCBI gene (formerly Entrezgene);Acc:827786]	NS	NS	NS	NS	NS	0.719461	NS	NS	0.663228	0.611183	LESION SIMULATING DISEASE (LSD1); CONTAINS InterPro DOMAIN/s: Zinc finger, LSD1-type (InterPro:IPR005735); BEST Arabidopsis thaliana protein match is: lsd one like 1 (TAIR:AT1G32540.1); Has 361 Blast hits to 293 proteins in 54 species: Archae - 0; Bacteria - 0; Metazoa - 49; Fungi - 0; Plants - 249; Viruses - 0; Other Eukaryotes - 63 (source: NCBI BLink).
AT4G24520	ATR1	P450 reductase 1 [Source:NCBI gene (formerly Entrezgene);Acc:828554]	NS	NS	NS	NS	NS	0.578397	0.453462	NS	0.620319	0.615961	P450 reductase 1 (ATR1); FUNCTIONS IN: NADPH-hemoprotein reductase activity; INVOLVED IN: response to oxidative stress, phenylpropanoid metabolic process; LOCATED IN: endoplasmic reticulum; EXPRESSED IN: 24 plant structures; EXPRESSED DURING: 15 growth stages; CONTAINS InterPro DOMAIN/s: Ferredoxin reductase-type FAD-binding domain (InterPro:IPR017927), Flavodoxin/nitric oxide synthase (InterPro:…
AT4G31510	AT4G31510	major centromere autoantigen B-like protein [Source:NCBI gene (formerly Entrezgene);Acc:829278]	NS	NS	NS	0.621748	NS	0.697508	0.882046	0.692365	0.879826	1.22046	unknown protein; BEST Arabidopsis thaliana protein match is: unknown protein (TAIR:AT2G24550.1); Has 205 Blast hits to 205 proteins in 31 species: Archae - 0; Bacteria - 0; Metazoa - 5; Fungi - 3; Plants - 187; Viruses - 0; Other Eukaryotes - 10 (source: NCBI BLink).
AT4G34890	XDH1	xanthine dehydrogenase 1 [Source:NCBI gene (formerly Entrezgene);Acc:829641]	NS	NS	NS	NS	NS	0.800282	0.496335	NS	0.677212	0.479695	xanthine dehydrogenase 1 (XDH1); CONTAINS InterPro DOMAIN/s: Aldehyde oxidase/xanthine dehydrogenase (InterPro:IPR016208), Ferredoxin (InterPro:IPR001041), Molybdopterin dehydrogenase, FAD-binding (InterPro:IPR002346), [2Fe-2S]-binding (InterPro:IPR002888), FAD-binding, type 2, subdomain 1 (InterPro:IPR016167), FAD-binding, type 2 (InterPro:IPR016166), CO dehydrogenase flavoprotein, C-terminal (I…
AT4G37530	AT4G37530	Peroxidase superfamily protein [Source:NCBI gene (formerly Entrezgene);Acc:829908]	NS	NS	NS	NS	NS	0.724903	NS	1.21976	1.1638	0.977586	Peroxidase superfamily protein; FUNCTIONS IN: protein binding, peroxidase activity; INVOLVED IN: response to salt stress; LOCATED IN: endomembrane system; EXPRESSED IN: root; CONTAINS InterPro DOMAIN/s: Haem peroxidase (InterPro:IPR010255), Plant peroxidase (InterPro:IPR000823), Peroxidases heam-ligand binding site (InterPro:IPR019793), Haem peroxidase, plant/fungal/bacterial (InterPro:IPR002016)…
AT5G03280	EIN2	NRAMP metal ion transporter family protein [Source:NCBI gene (formerly Entrezgene);Acc:831889]	NS	NS	NS	NS	NS	0.495792	0.50099	NS	0.386952	0.501368	ETHYLENE INSENSITIVE 2 (EIN2); FUNCTIONS IN: transporter activity; INVOLVED IN: in 22 processes; LOCATED IN: membrane; EXPRESSED IN: 23 plant structures; EXPRESSED DURING: 13 growth stages; CONTAINS InterPro DOMAIN/s: Natural resistance-associated macrophage protein (InterPro:IPR001046), Ethylene-insensitive 2 (InterPro:IPR017187); BEST Arabidopsis thaliana protein match is: natural resistance-as…
AT5G13240	AT5G13240	transcription regulator [Source:NCBI gene (formerly Entrezgene);Acc:831164]	NS	NS	NS	NS	NS	0.563075	NS	NS	NS	NS	transcription regulators; FUNCTIONS IN: transcription regulator activity; INVOLVED IN: negative regulation of transcription from RNA polymerase III promoter; LOCATED IN: nucleus; EXPRESSED IN: 25 plant structures; EXPRESSED DURING: 14 growth stages; CONTAINS InterPro DOMAIN/s: Maf1 regulator (InterPro:IPR015257), RNA polymerase III transcriptional repressor, MAF1 (InterPro:IPR017152); Has 30201 B…
AT5G16470	AT5G16470	zinc finger (C2H2 type) family protein [Source:NCBI gene (formerly Entrezgene);Acc:831508]	NS	NS	NS	NS	NS	0.441147	0.57451	NS	NS	0.61242	zinc finger (C2H2 type) family protein; FUNCTIONS IN: sequence-specific DNA binding transcription factor activity, zinc ion binding, nucleic acid binding; INVOLVED IN: regulation of transcription; LOCATED IN: intracellular; EXPRESSED IN: 24 plant structures; EXPRESSED DURING: 15 growth stages; CONTAINS InterPro DOMAIN/s: Zinc finger, C2H2-like (InterPro:IPR015880); BEST Arabidopsis thaliana prote…
AT5G20230	BCB	blue-copper-binding protein [Source:NCBI gene (formerly Entrezgene);Acc:832145]	NS	NS	NS	NS	NS	1.80014	2.29152	0.963234	1.84133	2.86067	blue-copper-binding protein (BCB); FUNCTIONS IN: electron carrier activity, copper ion binding; INVOLVED IN: response to oxidative stress, response to salt stress, aluminum ion transport, response to wounding, response to absence of light; LOCATED IN: anchored to plasma membrane, plasma membrane, vacuole, anchored to membrane; EXPRESSED IN: 24 plant structures; EXPRESSED DURING: 12 growth stages;…
AT5G24890	AT5G24890	stress response NST1-like protein [Source:NCBI gene (formerly Entrezgene);Acc:832558]	NS	NS	NS	NS	NS	1.00506	1.18095	0.930192	1.23557	1.28005	unknown protein; FUNCTIONS IN: molecular_function unknown; INVOLVED IN: biological_process unknown; LOCATED IN: cellular_component unknown; EXPRESSED IN: 24 plant structures; EXPRESSED DURING: 13 growth stages; BEST Arabidopsis thaliana protein match is: unknown protein (TAIR:AT2G24550.1); Has 1807 Blast hits to 1807 proteins in 277 species: Archae - 0; Bacteria - 0; Metazoa - 736; Fungi - 347; P…
AT5G39580	AT5G39580	Peroxidase superfamily protein [Source:NCBI gene (formerly Entrezgene);Acc:833954]	NS	NS	NS	NS	NS	2.1456	3.53109	2.34928	NS	3.3053	Peroxidase superfamily protein; FUNCTIONS IN: peroxidase activity, heme binding; INVOLVED IN: defense response to fungus, N-terminal protein myristoylation; LOCATED IN: endomembrane system; EXPRESSED IN: 17 plant structures; EXPRESSED DURING: 12 growth stages; CONTAINS InterPro DOMAIN/s: Haem peroxidase (InterPro:IPR010255), Plant peroxidase (InterPro:IPR000823), Haem peroxidase, plant/fungal/bac…
AT5G39610	NAC6	NAC domain containing protein 6 [Source:NCBI gene (formerly Entrezgene);Acc:833957]	NS	1.25938	NS	NS	NS	2.82689	3.18437	3.3374	2.90123	3.53368	NAC domain containing protein 6 (NAC6); CONTAINS InterPro DOMAIN/s: No apical meristem (NAM) protein (InterPro:IPR003441); BEST Arabidopsis thaliana protein match is: NAC domain containing protein 3 (TAIR:AT3G29035.1); Has 3041 Blast hits to 3034 proteins in 79 species: Archae - 0; Bacteria - 0; Metazoa - 0; Fungi - 0; Plants - 3041; Viruses - 0; Other Eukaryotes - 0 (source: NCBI BLink).
AT5G41150	UVH1	Restriction endonuclease, type II-like superfamily protein [Source:NCBI gene (formerly Entrezgene);Acc:834117]	NS	NS	NS	NS	NS	0.551089	NS	NS	NS	NS	ULTRAVIOLET HYPERSENSITIVE 1 (UVH1); CONTAINS InterPro DOMAIN/s: ERCC4 domain (InterPro:IPR006166), Restriction endonuclease, type II-like (InterPro:IPR011335), DNA repair nuclease, XPF-type/Helicase (InterPro:IPR020819); Has 1807 Blast hits to 1807 proteins in 277 species: Archae - 0; Bacteria - 0; Metazoa - 736; Fungi - 347; Plants - 385; Viruses - 0; Other Eukaryotes - 339 (source: NCBI BLink).
AT5G44660	AT5G44660		NS	NS	NS	NS	NS	0.701159	NS	NS	NS	NS	unknown protein; BEST Arabidopsis thaliana protein match is: unknown protein (TAIR:AT4G20190.1); Has 944 Blast hits to 462 proteins in 141 species: Archae - 2; Bacteria - 370; Metazoa - 161; Fungi - 102; Plants - 64; Viruses - 6; Other Eukaryotes - 239 (source: NCBI BLink).
AT5G54500	FQR1	flavodoxin-like quinone reductase 1 [Source:NCBI gene (formerly Entrezgene);Acc:835538]	NS	NS	NS	NS	NS	0.95093	0.927782	0.594064	0.907755	1.02806	flavodoxin-like quinone reductase 1 (FQR1); FUNCTIONS IN: FMN binding, oxidoreductase activity, acting on NADH or NADPH, quinone or similar compound as acceptor; INVOLVED IN: oxidation reduction, response to auxin stimulus; LOCATED IN: plasma membrane, vacuole, membrane; EXPRESSED IN: 25 plant structures; EXPRESSED DURING: 15 growth stages; CONTAINS InterPro DOMAIN/s: Flavoprotein WrbA (InterPro:…
AT5G54810	TSB1	tryptophan synthase beta-subunit 1 [Source:NCBI gene (formerly Entrezgene);Acc:835571]	NS	NS	NS	NS	NS	0.477527	0.390202	NS	NS	0.705494	tryptophan synthase beta-subunit 1 (TSB1); FUNCTIONS IN: tryptophan synthase activity; INVOLVED IN: response to oxidative stress, tryptophan biosynthetic process, response to salt stress, indoleacetic acid biosynthetic process; LOCATED IN: chloroplast stroma, chloroplast; EXPRESSED IN: guard cell, root; CONTAINS InterPro DOMAIN/s: Tryptophan synthase, beta chain (InterPro:IPR006654), Tryptophan s…
GO enrichment analysis
GO-BP
Enrichment FDR	nGenes	Biological Process (BP)	Pathway Genes	Fold Enrichment
2.69759e-07	4	response to photooxidative stress	13	184.803
2.60338e-07	5	cellular response to reactive oxygen species	37	81.1633
3.18275e-74	44	response to oxidative stress	454	58.2088
1.27084e-18	14	response to reactive oxygen species	161	52.2268
1.55575e-07	6	response to hydrogen peroxide	73	49.3651
9.87617e-08	7	hydrogen peroxide metabolic proc.	122	34.4612
3.81213e-09	9	reactive oxygen species metabolic proc.	199	27.1632
1.57032e-06	7	cellular detoxification	194	21.6714
1.57032e-06	7	cellular response to toxic substance	195	21.5603
5.00181e-17	20	response to inorganic substance	790	15.2053
8.37084e-07	9	leaf development	395	13.6848
1.05179e-07	11	phyllome development	559	11.8188
4.152e-13	22	response to oxygen-containing compound	1679	7.8698
9.24412e-08	15	cellular response to stress	1272	7.08265
1.73978e-11	21	cellular response to chemical stimulus	1791	7.04231
4.87067e-37	46	response to stress	3953	6.98912
1.76813e-06	13	defense response to other organism	1178	6.62811
1.08868e-20	34	response to chemical	3091	6.6065
2.31284e-06	15	defense response	1704	5.28705
3.81213e-09	24	cellular response to stimulus	3315	4.3483
GO-MF
Enrichment FDR	nGenes	Molecular Function (MF)	Pathway Genes	Fold Enrichment
0.022	2	FMN binding	29	41.4
0.0078	3	FAD binding	80	22.5
0.00029	5	Peroxidase activity	136	22.1
0.00029	5	Oxidoreductase activity acting on peroxide as acceptor	143	21
0.00041	5	Antioxidant activity	167	18
0.0047	4	Flavin adenine dinucleotide binding	165	14.6
0.0017	11	Oxidoreductase activity	1598	4.1
GO-CC
Enrichment FDR	nGenes	Cellular Component (CC)	Pathway Genes	Fold Enrichment
0.0026	15	Cytosol	2789	3.2
0.012	15	Cell periphery	3381	2.7
Transcription factor enrichment analysis
TF-AGRIS
Enrichment FDR	nGenes	Transcription Factor Binding Motif	Pathway Genes	Fold Enrichment
NS

## Sheet: Group VII-OS
GO- and Transcription Factor- Enrichment analyses of group-VIIOS genes			DEG Expcression log2 FC (FL/GC)
Gene Annotation			Root	adc1-R	OXPtADC-R	cdr7/cuao3-R	OXCuAO3-R	Shoot	adc1-S	OXPtADC-S	cdr7/cuao3-S	OXCuAO3-S	Annotation
Gene ID	Symbol	Description	Col	adc1	OXPtADC	cdr7/cuao3	OXCuAO3	Col	adc1	OXPtADC	cdr7/cuao3	OXCuAO3
AT4G02380	SAG21	senescence-associated 21 [Source:NCBI gene (formerly Entrezgene);Acc:828053]	-0.885489	NS	-0.954099	NS	-0.861453	2.19056	2.2603	1.92948	2.49765	2.52635	senescence-associated gene 21 (SAG21); CONTAINS InterPro DOMAIN/s: Late embryogenesis abundant protein, group 3 (InterPro:IPR004926); BEST Arabidopsis thaliana protein match is: Late embryogenesis abundant 3 (LEA3) family protein (TAIR:AT1G02820.1); Has 181 Blast hits to 176 proteins in 36 species: Archae - 0; Bacteria - 0; Metazoa - 0; Fungi - 0; Plants - 181; Viruses - 0; Other Eukaryotes - 0 (…
AT4G33420	AT4G33420	Peroxidase superfamily protein [Source:NCBI gene (formerly Entrezgene);Acc:829479]	-0.833653	NS	-1.10452	NS	NS	0.556833	1.55079	0.78718	0.769142	0.953224	Peroxidase superfamily protein; FUNCTIONS IN: peroxidase activity, heme binding; INVOLVED IN: response to oxidative stress, oxidation reduction; EXPRESSED IN: 20 plant structures; EXPRESSED DURING: 10 growth stages; CONTAINS InterPro DOMAIN/s: Haem peroxidase (InterPro:IPR010255), Plant peroxidase (InterPro:IPR000823), Peroxidases heam-ligand binding site (InterPro:IPR019793), Haem peroxidase, pl…
AT5G01600	FER1	ferretin 1 [Source:NCBI gene (formerly Entrezgene);Acc:831720]	-0.440995	NS	NS	NS	NS	1.38444	1.23486	1.59266	1.17853	1.48805	ferretin 1 (FER1); FUNCTIONS IN: ferric iron binding, iron ion binding; INVOLVED IN: in 12 processes; LOCATED IN: thylakoid, chloroplast thylakoid membrane, chloroplast stroma, chloroplast, membrane; EXPRESSED IN: 25 plant structures; EXPRESSED DURING: 15 growth stages; CONTAINS InterPro DOMAIN/s: Ferritin, N-terminal (InterPro:IPR001519), Ferritin-related (InterPro:IPR012347), Ferritin-like (Int…
AT5G66390	AT5G66390	Peroxidase superfamily protein [Source:NCBI gene (formerly Entrezgene);Acc:836771]	-0.385349	NS	NS	NS	NS	1.28996	NS	NS	NS	NS	Peroxidase superfamily protein; FUNCTIONS IN: peroxidase activity, heme binding; INVOLVED IN: response to oxidative stress, oxidation reduction; LOCATED IN: endomembrane system; EXPRESSED IN: leaf apex, hypocotyl, root, flower; EXPRESSED DURING: 4 anthesis, petal differentiation and expansion stage; CONTAINS InterPro DOMAIN/s: Haem peroxidase (InterPro:IPR010255), Plant peroxidase (InterPro:IPR00…
AT5G67480	BT4	BTB and TAZ domain protein 4 [Source:NCBI gene (formerly Entrezgene);Acc:836884]	-0.622453	NS	NS	NS	NS	1.91528	1.85305	1.86095	1.76047	2.2299	BTB and TAZ domain protein 4 (BT4); FUNCTIONS IN: transcription regulator activity; INVOLVED IN: response to auxin stimulus, response to gibberellin stimulus; LOCATED IN: plasma membrane, cytoplasm; EXPRESSED IN: 27 plant structures; EXPRESSED DURING: 15 growth stages; CONTAINS InterPro DOMAIN/s: BTB/POZ (InterPro:IPR013069), Zinc finger, TAZ-type (InterPro:IPR000197), BTB/POZ fold (InterPro:IPR0…
GO enrichment analysis
GO-BP
Enrichment FDR	nGenes	Biological Process (BP)	Pathway Genes	Fold Enrichment
0.024	1	Intracellular sequestering of iron ion	15	368.4
1.6e-05	3	Response to hydrogen peroxide	73	227.1
0.0038	2	Hydrogen peroxide catabolic proc.	99	111.6
0.00011	3	Response to reactive oxygen species	161	103
0.0049	2	Hydrogen peroxide metabolic proc.	122	90.6
0.0076	2	Cellular oxidant detoxification	176	62.8
2.1e-07	5	Response to oxidative stress	454	60.9
0.0076	2	Cellular detoxification	194	57
0.0076	2	Cellular response to toxic substance	195	56.7
0.0076	2	Reactive oxygen species metabolic proc.	199	55.5
0.0096	2	Response to wounding	233	47.4
0.015	2	Detoxification	299	37
0.02	2	Leaf development	395	28
0.02	2	Response to cold	400	27.6
0.005	3	Response to inorganic substance	790	21
0.02	3	Response to oxygen-containing compound	1679	9.9
0.023	3	Cellular response to chemical stimulus	1791	9.3
0.00078	5	Response to chemical	3091	8.9
0.0021	5	Response to stress	3953	7
GO-MF
Enrichment FDR	nGenes	Molecular Function (MF)	Pathway Genes	Fold Enrichment
0.0033	1	Ferroxidase activity	5	1105.1
0.0033	1	Oxidoreductase activity acting on metal ions oxygen as acceptor	5	1105.1
0.0036	1	Ferric iron binding	11	502.3
0.0054	1	Ferrous iron binding	20	276.3
0.0022	2	Peroxidase activity	136	81.3
0.016	1	Protein domain specific binding	68	81.3
0.0022	2	Oxidoreductase activity acting on peroxide as acceptor	143	77.3
0.0022	2	Antioxidant activity	167	66.2
0.0036	2	Heme binding	385	28.7
0.0037	2	Tetrapyrrole binding	421	26.2
0.0036	3	Oxidoreductase activity	1598	10.4
0.0036	4	Metal ion binding	3803	5.8
0.0036	4	Cation binding	3824	5.8
GO-CC
Enrichment FDR	nGenes	Cellular Component (CC)	Pathway Genes	Fold Enrichment
0.017	2	Plant-type cell wall	386	28.6
0.017	2	Cell wall	421	26.2
0.017	2	External encapsulating structure	450	24.6
0.017	3	Vacuole	1188	14
Transcription factor enrichment analysis
TF-AGRIS
Enrichment FDR	nGenes	Transcription Factor Binding Motif	Pathway Genes	Fold Enrichment
NS
